# Supplementary material for: Smarca4 Inactivation Promotes Lineage-Specific Transformation and Early Metastatic Features in the Lung
Source: Oxford University Press journal article supplement (doi:10.1158/2159-8290.cd-21-0248), 2021-09-24
Supplement: 21598290cd210248-sup-261127_2_supp_7390479_qzc04x.xlsx [file 21598290cd210248-sup-261127_2_supp_7390479_qzc04x.xlsx]

## Sheet: SMARCA2_DiffBind_results
Chr	Start	End	Conc	Conc_KO	Conc_WT	Fold(KO/WT)	p-value	FDR	KO_M	KO_23	WT_T2	WT_36
chr2	96575199	96578805	7.1	7.85	5.41	2.44	9.28e-09	3.53e-05	195.9	266	56.23	28.8
chr6	122638821	122640782	7.22	7.96	5.59	2.37	1.23e-08	3.53e-05	223.13	275	64.94	31.42
chr1	130294539	130298016	7.29	7.96	6.03	1.92	1.17e-07	0.000221	215.56	281	68.9	61.96
chr7	124921480	124923559	5.79	6.57	3.98	2.59	1.44e-07	1	99.84	90	15.84	15.71
chr5	101050961	101052986	7.43	8.07	6.25	1.83	1.53e-07	0.000221	263.97	275	86.33	65.45
chr2	120804459	120807527	6.9	7.59	5.53	2.06	2.05e-07	0.000237	183.79	201	53.06	39.27
chr2	13325517	13333809	8.71	9.28	7.77	1.51	1.77e-06	0.00147	471.21	771	270.07	166.68
chrX	91413309	91418076	7.37	8.02	6.14	1.88	1.93e-06	0.00147	283.63	237	93.46	48
chr8	55356921	55363018	7.26	7.91	6.06	1.84	2.05e-06	0.00147	184.55	296	73.66	60.22
chrX	152015933	152017847	5.06	5.91	2.78	3.13	2.08e-06	1	46.14	74	11.09	2.62
chr15	80745424	80747342	5.94	6.67	4.36	2.31	2.52e-06	1	86.98	117	24.55	16.58
chr15	59277560	59281854	7.97	8.58	6.91	1.67	3.26e-06	0.00205	286.66	478	147.31	93.38
chr13	17602457	17604357	7.19	7.91	5.7	2.21	3.56e-06	0.00205	140.68	341	68.11	35.78
chr3	56065141	56067998	7.03	7.68	5.82	1.87	4.42e-06	0.00211	156.57	255	50.69	61.96
chr12	14307448	14310799	7.4	8.02	6.27	1.75	4.53e-06	0.00211	204.97	315	62.57	91.63
chr2	78232555	78239944	7.67	8.25	6.69	1.57	4.76e-06	0.00211	258.67	352	117.22	89.01
chr15	81185586	81188022	5.98	6.68	4.53	2.15	5.33e-06	1	91.52	114	25.34	20.94
chr17	54293063	54299518	7.82	8.45	6.66	1.79	5.75e-06	0.00221	227.66	472	121.97	80.29
chr5	108259844	108262413	6.79	7.48	5.41	2.07	5.75e-06	0.00221	117.24	241	46.73	38.4
chr4	80593933	80597181	6.92	7.63	5.44	2.19	6.55e-06	0.00236	114.21	283	53.06	34.04
chr3	133286322	133291044	7.44	8.03	6.41	1.62	8.06e-06	0.00265	245.82	277	103.75	66.32
chr17	93716275	93722194	7.79	8.42	6.64	1.78	8.29e-06	0.00265	208.75	477	109.3	90.76
chr2	109245347	109248466	6.83	7.47	5.66	1.8	9.01e-06	0.00273	156.57	197	58.61	42.76
chr11	102436347	102438542	6.63	7.32	5.3	2.02	1.13e-05	0.00322	121.77	197	49.9	28.8
chr17	88859183	88863369	7.4	8.01	6.34	1.67	1.17e-05	0.00322	195.9	319	70.49	91.63
chr12	75924260	75928031	7.38	8.04	6.12	1.92	1.24e-05	0.00325	156.57	370	81.58	57.6
chr14	90009299	90011733	5.74	6.46	4.25	2.22	1.43e-05	1	67.32	109	21.38	16.58
chr9	124059398	124063098	7.16	7.79	5.99	1.81	1.59e-05	0.00377	288.93	155	73.66	53.23
chr2	65582341	65584449	6.25	6.93	4.92	2.01	1.64e-05	0.00377	108.92	135	38.02	22.69
chr19	20465731	20470067	7.6	8.21	6.54	1.67	1.67e-05	0.00377	319.18	272	125.93	60.22
chr8	68168586	68171297	7.26	7.85	6.25	1.6	1.7e-05	0.00377	197.41	263	86.33	65.45
chr8	58560824	58563596	6.12	6.81	4.78	2.03	1.77e-05	1	86.98	137	26.93	27.93
chr1	173399223	173401884	7.38	8.01	6.22	1.8	1.93e-05	0.00392	159.59	357	74.45	74.18
chr19	32390391	32397463	8.14	8.64	7.38	1.25	1.95e-05	0.00392	405.41	391	191.66	142.25
chr1	51121084	51124062	7.27	7.85	6.27	1.59	1.99e-05	0.00392	189.09	273	81.58	72.43
chr5	127017418	127019984	6.81	7.44	5.68	1.76	2.04e-05	0.00392	138.41	209	53.86	48.87
chr2	142605297	142606114	4.98	5.74	3.24	2.51	2.14e-05	1	52.19	55	11.88	6.98
chr5	12218747	12220553	5.78	6.54	4.11	2.42	2.18e-05	1	50.68	135	19.8	14.84
chr1	164882856	164884729	6.47	7.17	5.06	2.11	2.19e-05	0.00401	85.47	202	32.47	34.04
chr15	23509668	23512493	7.46	8.08	6.36	1.72	2.32e-05	0.00401	194.38	347	102.96	61.09
chr15	58311494	58313280	6.68	7.3	5.55	1.75	2.36e-05	0.00401	167.15	148	54.65	39.27
chr2	66345292	66346952	6.87	7.58	5.4	2.19	2.4e-05	0.00401	103.62	280	56.23	27.93
chr7	68483828	68487385	6.19	6.85	4.92	1.93	2.44e-05	0.00401	96.06	135	29.3	31.42
chr10	35763832	35766331	5.81	6.52	4.38	2.14	2.91e-05	1	94.54	89	28.51	13.09
chr1	84877385	84879102	6.01	6.68	4.75	1.93	2.97e-05	1	97.57	107	30.1	23.56
chr5	101678433	101681154	7.35	7.98	6.18	1.8	2.99e-05	0.00474	150.51	355	72.07	73.31
chr10	99613609	99617258	7.42	8.04	6.3	1.74	3.06e-05	0.00474	162.62	365	78.41	79.42
chr12	51067334	51073598	8.1	8.63	7.24	1.39	3.13e-05	0.00474	331.28	463	187.7	114.32
chr2	108073742	108077530	6.43	7.05	5.3	1.75	3.26e-05	0.00482	128.58	137	39.6	39.27
chrX	153462925	153464416	5.66	6.41	4.05	2.35	3.43e-05	1	100.6	69	25.34	7.85
chr2	46225555	46228237	5.84	6.54	4.42	2.12	3.45e-05	1	67.32	119	24.55	18.33
chr1	164721265	164724580	6.64	7.25	5.54	1.71	3.53e-05	0.00509	142.95	162	53.06	40.14
chr8	41008556	41010133	5.41	6.16	3.73	2.43	3.66e-05	1	40.09	103	13.46	13.09
chr11	3380418	3382926	7.25	7.81	6.33	1.48	3.89e-05	0.00544	218.59	230	68.9	91.63
chr2	60738260	60741602	6.94	7.55	5.87	1.68	3.97e-05	0.00544	152.78	221	68.11	48.87
chr6	149208639	149210912	6.62	7.33	5.17	2.16	4.09e-05	0.00548	78.66	244	38.81	33.16
chr13	4660875	4662365	5.54	6.25	4.09	2.16	4.38e-05	1	55.21	97	15.84	18.33
chr10	4376822	4380824	6.81	7.46	5.6	1.86	4.42e-05	0.0057	199.68	153	67.32	29.67
chr16	55537804	55542283	7.38	8	6.25	1.75	4.47e-05	0.0057	167.15	345	94.25	58.47
chr13	26308226	26310999	6.49	7.16	5.19	1.98	4.59e-05	0.0057	90.01	197	39.6	33.16
chr10	26968494	26970826	6.67	7.38	5.23	2.15	4.65e-05	0.0057	80.17	253	41.18	34.04
chr11	104219703	104230250	8.32	8.83	7.53	1.3	5.05e-05	0.00595	468.18	441	239.18	130.9
chr19	37588754	37591369	7.24	7.79	6.33	1.46	5.06e-05	0.00595	248.08	195	84.74	75.92
chrX	66550078	66551302	5.09	5.86	3.38	2.48	5.06e-05	1	34.79	81	10.3	10.47
chrX	49167075	49169415	5.28	5.99	3.85	2.14	5.27e-05	1	62.02	65	17.42	11.35
chr2	125856142	125860298	7.55	8.16	6.5	1.65	6.16e-05	0.00706	222.37	348	123.55	57.6
chr13	90371438	90376035	7.06	7.65	6.03	1.63	6.25e-05	0.00706	221.61	181	83.16	47.13
chr15	98494505	98496417	5.8	6.49	4.43	2.05	6.58e-05	1	80.17	99	13.46	29.67
chr5	91178419	91184151	7.48	8.01	6.64	1.37	6.67e-05	0.00739	239.76	277	113.26	86.4
chrX	153706808	153713881	7.47	8.06	6.43	1.64	6.92e-05	0.00752	340.36	195	111.67	60.22
chr3	9144549	9147437	6.69	7.3	5.62	1.68	8.1e-05	0.00864	151.27	163	36.43	61.96
chr1	23651592	23652488	4.95	5.77	2.87	2.89	8.5e-05	1	21.93	87	10.3	4.36
chr15	40788225	40790868	6.73	7.35	5.6	1.75	8.65e-05	0.00894	111.94	215	50.69	46.25
chr17	88593586	88596412	6.75	7.34	5.72	1.62	8.69e-05	0.00894	136.9	188	59.4	46.25
chrX	16602195	16604673	5.97	6.67	4.54	2.12	8.71e-05	1	64.29	139	30.1	16.58
chr2	44874730	44876362	5.63	6.33	4.2	2.13	9.34e-05	1	58.24	103	24.55	12.22
chrX	9385533	9388379	6.43	7.06	5.3	1.76	9.4e-05	0.00944	121.02	146	49.9	28.8
chr19	38157077	38159663	7.37	7.92	6.45	1.46	9.51e-05	0.00944	294.98	189	76.82	98.61
chr1	162449764	162452661	7.15	7.73	6.16	1.57	0.000103	0.01	155.05	269	78.41	64.58
chr7	150851583	150854149	6.39	5.21	7.03	-1.82	0.000111	0.0107	49.92	24	129.1	131.78
chr15	20572310	20573414	5.15	5.92	3.37	2.56	0.000113	1	26.47	95	11.88	8.73
chrX	153513537	153515302	5.1	5.81	3.64	2.16	0.000114	1	68.83	43	11.88	13.09
chr8	63429191	63435486	7.78	8.29	6.98	1.31	0.000115	0.0109	248.84	378	114.05	138.76
chr14	82464622	82465922	4.85	5.6	3.18	2.43	0.000118	1	36.31	61	11.09	6.98
chr8	55174794	55176314	5.48	6.15	4.18	1.97	0.000119	1	80.93	61	21.38	14.84
chr14	79514404	79516018	6.04	6.69	4.82	1.87	0.000125	1	74.88	131	28.51	27.93
chr5	64922353	64924891	6.33	6.98	5.09	1.89	0.000127	0.0118	83.96	169	40.39	27.93
chr19	19319717	19322546	7.57	8.16	6.57	1.58	0.000131	0.012	191.36	379	120.38	69.82
chr11	87122976	87124985	6.8	7.43	5.66	1.77	0.000135	0.0121	109.67	236	58.61	42.76
chr4	43024396	43026296	5.46	6.15	4.1	2.05	0.00014	1	59.75	82	22.97	11.35
chr9	77704052	77706192	5.1	5.82	3.56	2.26	0.000142	1	40.09	73	7.92	15.71
chr15	64088013	64091737	6.97	7.53	6.05	1.48	0.000144	0.0128	181.53	188	78.41	54.11
chr10	112048366	112052170	6.95	7.57	5.84	1.73	0.000152	0.0132	114.21	265	59.4	54.98
chr16	22967150	22968404	5.88	6.55	4.58	1.97	0.000153	1	62.02	125	26.93	20.94
chr13	117324066	117326294	5.8	6.44	4.6	1.85	0.000156	1	71.1	103	21.38	27.05
chr10	109311939	109313317	5.03	5.76	3.51	2.25	0.000158	1	64.29	44	15.84	6.98
chr11	10002100	10004010	5.98	6.62	4.8	1.82	0.000159	1	111.18	86	34.85	20.94
chrX	18742645	18750724	7.26	7.82	6.33	1.5	0.00016	0.0138	250.35	202	103.75	56.73
chr1	50537261	50538588	4.88	5.61	3.29	2.32	0.000161	1	52.94	45	13.46	6.11
chr13	83743179	83744391	5.42	6.15	3.86	2.29	0.000161	1	34.79	107	14.26	14.84
chr2	46054117	46055668	5.03	5.72	3.64	2.08	0.000165	1	50.68	55	11.88	13.09
chr10	54558055	54561000	6.91	7.52	5.81	1.71	0.000167	0.0141	112.7	255	55.44	56.73
chr2	81731452	81735188	6.48	7.12	5.3	1.83	0.000172	0.0143	96.06	183	49.9	28.8
chr4	15407947	15409463	4.57	5.38	2.6	2.78	0.000176	1	34.04	49	9.5	2.62
chrX	5991648	5993773	4.99	5.74	3.33	2.41	0.000187	1	52.19	55	16.63	3.49
chr13	17694174	17699358	7.16	7.75	6.14	1.61	0.0002	0.0162	158.08	273	91.87	48.87
chr16	52437484	52439376	6.24	6.87	5.08	1.79	0.000201	0.0162	81.69	153	37.22	30.54
chr13	98697287	98698903	5.88	6.51	4.75	1.76	0.000203	1	93.03	89	21.38	32.29
chr13	18066639	18068662	6.87	7.43	5.95	1.48	0.000203	0.0162	149.76	195	53.86	69.82
chr14	100646359	100647505	5.21	5.93	3.7	2.22	0.000207	1	40.84	81	18.22	7.85
chr16	79877939	79879785	6.4	7.11	4.98	2.12	0.000207	0.0164	76.39	199	46.73	16.58
chr17	92863063	92866511	6.41	7.09	5.1	1.98	0.000211	0.0164	67.32	205	35.64	33.16
chr19	9143793	9158918	8.98	9.38	8.42	0.95	0.000222	0.017	582.39	748	397.58	289.73
chr10	51136009	51137711	5.36	6.04	4.02	2.02	0.000236	1	44.63	87	15.05	17.45
chr9	42822288	42824543	6.8	7.4	5.78	1.62	0.000239	0.0178	120.26	217	64.15	45.38
chr11	86435792	86439918	7.14	7.66	6.31	1.35	0.00024	0.0178	198.92	205	89.5	68.94
chr19	19770095	19776010	7.56	8.07	6.75	1.32	0.000241	0.0178	232.2	307	130.68	84.65
chr13	97450153	97452377	6.85	7.4	5.96	1.44	0.000245	0.0178	164.89	173	53.06	71.56
chr2	28446374	28447642	6.43	7.06	5.28	1.78	0.000247	0.0178	85.47	181	43.56	34.04
chr1	54656805	54658770	6.07	6.73	4.85	1.88	0.000255	1	65.8	146	26.14	31.42
chr18	39483393	39486140	5.13	3.7	5.84	-2.14	0.000271	1	18.91	7	52.27	61.96
chr14	102277030	102279311	6.87	7.42	5.96	1.47	0.000271	0.0189	155.05	188	49.9	74.18
chr7	68022945	68024136	5.11	5.79	3.79	2	0.000272	1	63.53	47	11.09	16.58
chr15	85249357	85255789	7.52	8	6.79	1.21	0.000273	0.0189	262.46	250	99	122.18
chr8	126156385	126159732	6.68	7.25	5.75	1.49	0.000275	0.0189	150.51	153	63.36	44.51
chr2	46297989	46300146	6.12	6.75	4.95	1.8	0.000278	1	100.6	115	42.77	19.2
chr17	16617524	16622294	7.49	8.05	6.57	1.48	0.000279	0.0189	165.64	365	91.87	97.74
chr1	153522405	153528658	7.53	8.04	6.76	1.28	0.00028	0.0189	216.32	309	95.83	120.43
chr7	80695952	80700052	6.68	7.25	5.73	1.52	0.000283	0.0189	127.82	176	45.94	60.22
chr15	102553379	102554499	5.36	6.11	3.71	2.4	0.000289	1	27.23	111	16.63	9.6
chr2	76341422	76343554	5.91	6.54	4.77	1.77	0.000294	1	71.1	115	30.1	24.44
chr7	69213050	69214369	5.9	6.59	4.51	2.08	0.000299	1	46.14	147	23.76	21.82
chr16	20799588	20801204	5.62	6.26	4.41	1.85	0.000307	1	56.73	97	19.01	23.56
chr8	126150192	126154420	7.34	7.9	6.42	1.48	0.000308	0.0202	161.1	317	72.86	98.61
chr19	36201202	36207807	7.99	8.46	7.29	1.17	0.000315	0.0202	333.55	370	192.45	120.43
chr19	20488821	20501482	8.45	8.87	7.85	1.02	0.000316	0.0202	417.51	519	266.9	194.61
chr3	145133189	145134793	6.27	6.9	5.14	1.77	0.000316	0.0202	80.17	159	29.3	41.02
chr17	23682345	23688410	7.58	8.07	6.85	1.22	0.00032	0.0202	229.18	308	105.34	124.8
chr13	5843097	5847135	7.4	7.91	6.61	1.3	0.000323	0.0202	198.92	283	86.33	109.09
chr4	129001065	129003027	6	6.61	4.9	1.71	0.000324	1	76.39	119	30.1	29.67
chr5	104165245	104168452	6.43	7.03	5.38	1.65	0.000332	0.0206	94.54	167	45.14	38.4
chr2	44772578	44777432	7.25	7.8	6.34	1.46	0.000339	0.0208	161.86	283	95.83	66.32
chr7	35112180	35113759	5.29	6.03	3.69	2.34	0.000356	1	37.06	94	20.59	5.24
chr19	27975530	27983710	7.9	8.4	7.12	1.28	0.000375	0.0228	236.74	441	156.02	122.18
chr7	5557373	5560227	5.79	6.41	4.67	1.74	0.000379	1	74.88	95	30.89	20.07
chr12	71096631	71100446	7.6	8.11	6.79	1.32	0.000381	0.0229	229.18	324	138.6	82.91
chr14	17789865	17791063	5.31	5.96	4.13	1.83	0.000382	1	71.1	53	16.63	18.33
chr7	124232777	124235638	6.09	6.68	5.05	1.63	0.000385	1	85.47	120	34.06	32.29
chr1	64646696	64650071	7.05	7.63	6.08	1.55	0.000388	0.023	139.93	255	50.69	84.65
chrX	137967729	137970079	5.77	6.44	4.48	1.96	0.000395	1	105.13	69	33.26	11.35
chr4	116349657	116352932	6.57	7.18	5.49	1.68	0.000395	0.0232	91.52	198	49.1	41.02
chr3	136263703	136265869	6.16	6.74	5.17	1.58	0.000405	1	111.18	103	40.39	31.42
chr11	40713956	40715620	5.79	6.48	4.41	2.07	0.000413	1	46.14	133	27.72	14.84
chr8	23989261	23997518	7.86	8.41	6.95	1.46	0.000421	0.0245	185.31	497	122.76	124.8
chr1	153535612	153538366	6.06	6.69	4.91	1.77	0.000428	1	68.83	137	34.06	26.18
chr5	90411318	90413122	5.21	5.97	3.55	2.42	0.000437	1	21.18	104	10.3	13.09
chr4	22347118	22348679	6.09	6.77	4.77	1.99	0.000448	1	50.68	167	28.51	26.18
chr13	90476722	90478647	5.96	6.58	4.86	1.73	0.000457	1	68.83	123	30.89	27.05
chr16	70329895	70331478	4.76	5.52	3.1	2.41	0.00046	1	26.47	65	11.09	6.11
chr17	74921339	74924876	6.75	7.3	5.85	1.45	0.000471	0.0264	130.09	185	49.9	65.45
chr11	86409764	86419828	7.89	8.33	7.26	1.08	0.000472	0.0264	300.27	344	168.7	137.01
chr16	31591590	31594801	6.32	6.95	5.17	1.78	0.000478	0.0264	80.93	167	46.73	25.31
chrX	13417510	13419356	4.52	5.28	2.8	2.48	0.000479	1	47.65	30	8.71	5.24
chr14	99947359	99950749	6.33	6.91	5.34	1.56	0.00048	0.0264	95.3	145	41.98	39.27
chr17	59214147	59218147	7.21	7.73	6.39	1.34	0.000481	0.0264	169.42	255	94.25	73.31
chr14	120721874	120724288	6.44	7.03	5.44	1.59	0.000482	0.0264	119.5	141	56.23	30.54
chr14	110411900	110413816	5.74	6.35	4.65	1.7	0.000484	1	71.85	91	29.3	20.94
chr11	40602868	40605074	6.32	6.9	5.34	1.56	0.000486	0.0264	97.57	142	35.64	45.38
chr8	61393407	61396736	6.47	7.15	5.16	1.99	0.000501	0.027	56.73	227	34.85	36.65
chr14	96898994	96900112	4.97	5.69	3.46	2.23	0.000506	1	34.04	69	15.84	6.11
chr13	22026393	22029169	6.27	6.83	5.32	1.51	0.000517	0.0276	114.97	113	35.64	44.51
chr16	45037679	45039728	5.59	6.2	4.51	1.68	0.000527	1	65.8	81	22.97	22.69
chr5	91669999	91672964	6.83	7.36	5.98	1.38	0.00053	0.028	139.17	189	66.53	59.34
chr14	49682145	49684423	5.38	6.02	4.18	1.85	0.000548	1	49.16	81	21.38	14.84
chr15	99682018	99684238	6.05	6.63	5.06	1.57	0.000556	1	86.98	111	31.68	34.91
chr18	55019710	55021934	6.73	7.27	5.84	1.43	0.000562	0.0294	136.14	173	46.73	68.07
chr2	13492979	13499804	7.72	8.16	7.06	1.1	0.000582	0.0302	260.94	313	144.14	123.05
chr15	90933762	90935656	5.07	5.72	3.87	1.85	0.000585	1	52.19	53	13.46	15.71
chr11	56186400	56189537	6.4	6.97	5.42	1.55	0.000586	0.0302	152.03	99	49.9	35.78
chr2	101095650	101098175	5.85	6.45	4.78	1.67	0.000595	1	108.16	67	25.34	29.67
chr18	70548614	70552508	7.3	7.85	6.4	1.45	0.000602	0.0306	144.46	317	91.08	77.67
chr13	6191140	6193475	6.65	7.19	5.8	1.38	0.000606	0.0306	136.14	155	51.48	60.22
chr2	11319232	11321418	6.06	6.66	5.01	1.65	0.000615	1	74.88	127	34.85	29.67
chr2	80689654	80691762	5.98	6.66	4.66	2.01	0.000618	1	44.63	158	27.72	22.69
chr1	51306559	51308384	5.53	6.17	4.33	1.84	0.000637	1	49.16	95	15.84	24.44
chr9	47482609	47484155	5.7	6.35	4.49	1.86	0.000664	1	55.97	107	30.1	14.84
chr15	31402193	31404066	5.69	6.29	4.66	1.64	0.00067	1	87.74	69	27.72	22.69
chr15	37827111	37830828	6.86	7.38	6.03	1.36	0.000681	0.0341	142.95	191	57.02	73.31
chr1	195239224	195241931	7.19	7.72	6.35	1.36	0.000698	0.0347	152.03	269	90.29	73.31
chr9	34086445	34088337	6.93	7.52	5.92	1.59	0.000707	0.0348	114.97	251	76.82	44.51
chr12	51139120	51140705	5.79	6.48	4.45	2.03	0.000727	1	39.33	139	17.42	26.18
chr11	42718383	42720623	6.05	6.63	5.04	1.6	0.000738	1	91.52	107	41.18	24.44
chr17	66085696	66088120	6.42	7	5.41	1.59	0.000739	0.0361	85.47	171	40.39	44.51
chr15	15291244	15292592	5.54	6.25	4.06	2.19	0.000741	1	27.23	125	15.05	18.33
chr5	98294440	98299061	7.28	7.82	6.4	1.42	0.000761	0.0369	145.98	307	95.83	73.31
chr5	12208605	12211474	6	6.6	4.97	1.62	0.000764	1	72.61	121	34.06	28.8
chr15	90821044	90823856	5.89	6.5	4.82	1.69	0.000779	1	100.6	81	38.02	18.33
chr9	71789004	71792636	6.48	7.06	5.5	1.56	0.000794	0.0381	94.54	173	53.06	37.53
chr5	145077307	145084268	7.68	8.14	7	1.14	0.000804	0.0383	226.15	339	130.68	125.67
chr4	59327023	59328979	5.99	6.61	4.9	1.71	0.00081	1	77.9	117	40.39	19.2
chr7	53574895	53578434	6.34	6.91	5.4	1.51	0.000815	0.0385	95.3	145	47.52	36.65
chr5	93724239	93728116	7.18	7.71	6.32	1.39	0.000827	0.0387	149	270	64.94	95.12
chr3	10385505	10388548	6.36	6.93	5.38	1.55	0.000839	0.0389	105.13	139	29.3	54.11
chr8	81292048	81295955	6.31	6.89	5.3	1.59	0.000844	0.0389	88.49	149	48.31	30.54
chr9	75870671	75873397	6.7	7.26	5.77	1.49	0.000856	0.0391	186.82	119	68.9	40.14
chr19	37338045	37343328	8.07	8.46	7.52	0.95	0.000861	0.0391	362.29	344	186.12	180.65
chr7	111366044	111368621	5.29	5.95	4.04	1.91	0.000868	1	38.57	85	19.8	13.09
chr19	30014697	30026596	8.38	8.75	7.88	0.87	0.000874	0.0393	443.98	417	228.89	241.74
chr1	7382486	7384676	4.37	5.13	2.67	2.47	0.000921	1	37.06	33	3.96	8.73
chr17	93921275	93926566	7.5	8.05	6.6	1.45	0.000929	0.0415	144.46	385	101.38	92.51
chr13	4710675	4712878	6.4	6.95	5.51	1.44	0.000939	0.0416	108.16	139	38.81	52.36
chr12	10416537	10419058	5.95	6.53	4.95	1.58	0.000946	1	71.85	113	28.51	33.16
chr12	82535097	82537086	5.16	5.79	4.02	1.77	0.000955	1	45.38	65	15.84	16.58
chr10	98709473	98711335	5.31	5.92	4.25	1.67	0.000988	1	59.75	61	20.59	17.45
chr2	75474011	75483297	7.38	7.84	6.71	1.13	0.000995	0.0436	224.64	233	114.84	94.25
chr5	64460962	64463703	6.32	6.85	5.45	1.41	0.000999	0.0436	110.43	121	41.98	45.38
chr1	180146891	180149361	6.41	7.02	5.34	1.69	0.00102	0.0444	71.1	189	37.22	43.63
chr3	19856412	19858931	5.94	6.55	4.85	1.7	0.00104	1	117.24	70	18.22	39.27
chr8	40826857	40828265	5.4	6.08	4.07	2.01	0.00104	1	32.52	103	20.59	13.09
chr9	3636632	3637705	4.98	5.7	3.48	2.22	0.00105	1	21.93	82	11.88	10.47
chr13	54196222	54197693	5.26	5.9	4.08	1.81	0.00107	1	58.24	61	9.5	24.44
chrX	138500620	138502288	4.66	5.38	3.16	2.22	0.00107	1	33.28	50	12.67	5.24
chr4	55338175	55340368	5.81	6.4	4.8	1.6	0.00112	1	96.06	73	34.85	20.94
chr1	108296927	108298457	6.42	6.96	5.53	1.43	0.00112	0.0476	102.86	146	41.18	51.49
chr19	9054405	9065308	8.99	9.35	8.51	0.84	0.00112	0.0476	554.41	754	414.21	315.04
chr9	69301902	69307278	7.47	7.94	6.78	1.16	0.00112	0.0476	206.49	285	125.14	94.25
chr2	59474801	59476899	5.21	5.87	3.99	1.87	0.00113	1	41.6	75	21.38	10.47
chrX	103379455	103383419	6.85	7.35	6.09	1.26	0.00115	0.0484	148.25	177	67.32	68.94
chr2	146409043	146410211	5.88	6.5	4.77	1.73	0.00116	1	65.8	115	37.22	17.45
chr6	143635859	143638839	5.25	4.01	5.9	-1.89	0.00116	1	8.32	24	75.24	44.51
chr8	4580361	4583761	6.35	6.96	5.27	1.68	0.00117	0.0487	67.32	181	37.22	40.14
chr9	85060719	85061874	4.67	5.38	3.18	2.2	0.00119	1	26.47	57	10.3	7.85
chr14	61564802	61566844	5.31	5.92	4.24	1.68	0.0012	1	53.7	67	15.05	22.69
chrX	73078005	73082214	6.64	7.25	5.56	1.69	0.00123	0.0509	133.88	171	73.66	20.94
chr1	155145961	155148534	6.45	7.04	5.46	1.58	0.00124	0.0509	79.42	183	45.94	41.89
chr1	164062098	164064412	6.12	6.75	4.95	1.8	0.00124	1	52.94	163	35.64	26.18
chr17	71540399	71545842	7.8	8.33	6.97	1.36	0.00125	0.0512	179.26	463	145.73	104.72
chr13	45718543	45720100	5.83	6.39	4.9	1.49	0.00128	1	80.93	87	31.68	27.93
chr15	99675496	99681262	7	7.49	6.25	1.24	0.00128	0.0519	150.51	208	76.03	75.92
chr17	75511870	75513107	6.02	6.67	4.81	1.85	0.00129	1	46.14	157	30.89	25.31
chr4	5091778	5093236	4.8	5.5	3.38	2.12	0.00129	1	25.72	65	9.5	11.35
chr1	71050378	71052411	6.84	7.43	5.83	1.6	0.0013	0.0525	91.52	253	67.32	46.25
chrX	91397369	91398597	4.84	5.54	3.46	2.08	0.00131	1	59.75	33	15.84	6.11
chrX	161735437	161738467	6.41	6.95	5.55	1.4	0.00132	0.0527	132.36	115	56.23	37.53
chr11	42716213	42717793	5.26	5.88	4.15	1.73	0.00133	1	43.11	75	19.01	16.58
chr19	18826085	18834163	7.89	8.32	7.28	1.05	0.00134	0.053	356.24	285	184.53	125.67
chr19	29340493	29359313	8.95	9.28	8.54	0.74	0.00134	0.053	657.27	582	366.69	377.88
chr5	3150675	3153349	5.74	6.34	4.71	1.63	0.00136	1	80.93	81	35.64	16.58
chr17	51130157	51133342	6.26	6.84	5.28	1.56	0.00137	0.0534	74.12	155	36.43	41.02
chr13	5868256	5871555	6.8	7.3	6.02	1.29	0.00138	0.0534	130.85	185	65.74	63.71
chr7	135814555	135817344	6.09	6.64	5.2	1.44	0.00138	1	90.01	109	33.26	40.14
chr2	36423809	36425970	4.52	5.25	2.95	2.3	0.00138	1	31.01	45	11.09	4.36
chr11	87255901	87264618	7.92	8.36	7.28	1.08	0.00139	0.0534	245.82	411	151.27	159.7
chr2	61104498	61107169	5.76	6.35	4.76	1.58	0.00139	1	65.8	97	32.47	21.82
chr5	5176926	5182281	7.23	7.74	6.45	1.28	0.0014	0.0534	150.51	276	94.25	81.16
chr9	79060661	79064602	6.23	6.86	5.06	1.8	0.0014	0.0534	53.7	179	38.81	27.93
chr13	36294434	36295500	5.01	5.64	3.86	1.78	0.00141	1	40.84	59	15.05	13.96
chr2	101044080	101047171	6.8	7.31	6.01	1.3	0.00141	0.0534	185.31	132	72.86	55.85
chr2	125888321	125889751	5.09	5.76	3.81	1.95	0.00143	1	29.5	79	15.05	13.09
chr2	24417637	24419862	6.19	6.75	5.26	1.49	0.00143	0.0536	82.44	133	42.77	34.04
chr9	38672699	38675027	5.84	6.52	4.53	2	0.00143	1	34.79	149	27.72	18.33
chr4	93804132	93806108	5.53	6.22	4.19	2.03	0.00143	1	27.99	121	19.8	16.58
chr2	75506982	75511988	6.65	7.17	5.84	1.34	0.00143	0.0536	141.44	147	69.7	44.51
chr2	107862180	107864370	6.16	6.73	5.21	1.52	0.00143	1	83.2	129	45.14	28.8
chr11	80762135	80763942	6.05	6.63	5.07	1.56	0.00144	1	127.82	70	27.72	39.27
chr10	109305879	109307987	5.46	6.04	4.47	1.57	0.00144	1	65.8	66	19.01	25.31
chr3	126271992	126274559	6.85	7.37	6.02	1.35	0.00145	0.0536	120.26	211	69.7	60.22
chr4	137196594	137198573	6.23	6.78	5.32	1.46	0.00146	0.0536	88.49	131	45.14	34.91
chr19	7553388	7577184	9.3	9.63	8.87	0.76	0.00146	0.0536	864.52	721	544.1	390.09
chr19	20631718	20636439	7.37	7.81	6.72	1.09	0.00148	0.0541	212.54	236	110.88	100.36
chrX	98565729	98566810	4.68	5.4	3.2	2.2	0.0015	1	23.45	61	7.92	10.47
chr9	110712226	110713510	5.18	5.81	4.03	1.78	0.00151	1	67.32	45	22.18	10.47
chr2	22889435	22891317	5.6	6.23	4.47	1.76	0.00152	1	47.65	102	28.51	15.71
chr5	86672663	86674944	6.36	6.91	5.46	1.45	0.00155	0.0563	97.57	143	53.86	34.04
chr1	9936651	9938548	5.69	6.25	4.75	1.5	0.00157	1	71.1	81	27.72	26.18
chr2	63118289	63120122	5.03	5.72	3.64	2.09	0.0016	1	22.69	83	12.67	12.22
chr18	25917555	25919876	5.08	3.9	5.72	-1.82	0.00161	1	12.86	17	34.85	70.69
chr1	171568364	171569818	5.67	6.25	4.68	1.57	0.00163	1	58.24	94	26.14	25.31
chr15	62896772	62900154	6.77	7.32	5.87	1.46	0.00169	0.0607	103.62	217	69.7	47.13
chr11	86458832	86462269	6.89	7.43	6.01	1.42	0.00171	0.0607	169.42	175	91.08	37.53
chr2	52807999	52812459	7.12	7.59	6.43	1.15	0.00171	0.0607	179.26	205	95.83	76.8
chr19	22416926	22420968	6.72	7.25	5.87	1.39	0.00172	0.0607	201.19	104	61.78	54.98
chr15	102250220	102252875	6.54	7.15	5.44	1.72	0.00173	0.0607	62.02	223	41.18	45.38
chr10	99372336	99373550	5.92	6.52	4.87	1.65	0.00173	1	56.73	127	34.06	24.44
chr3	56776363	56778334	6.18	6.76	5.18	1.58	0.00174	1	65.8	151	35.64	36.65
chr3	97611293	97613597	4.92	3.76	5.55	-1.79	0.00174	1	12.1	15	40.39	53.23
chr9	7525617	7528358	5.82	6.48	4.54	1.95	0.00174	1	40.09	139	32.47	13.96
chr1	134930279	134931809	5.14	5.78	4	1.78	0.00176	1	38.57	71	11.88	20.07
chr1	179638809	179642494	7.31	7.82	6.51	1.3	0.00177	0.0615	144.46	307	99	83.78
chr4	86355852	86361823	7.12	7.62	6.33	1.29	0.00177	0.0615	148.25	246	97.42	63.71
chrX	18440251	18442847	5.52	6.16	4.38	1.78	0.00179	1	97.57	45	28.51	13.09
chrX	100847422	100849211	5.12	5.77	3.91	1.86	0.00179	1	43.11	66	22.18	7.85
chr17	35437463	35440150	6.39	6.93	5.53	1.39	0.0018	0.062	94.54	149	49.9	42.76
chr14	32581073	32583163	6.18	6.7	5.35	1.36	0.00181	0.062	103.62	105	40.39	41.02
chr5	37065642	37068790	6.68	7.19	5.89	1.3	0.00185	0.063	116.48	176	62.57	55.85
chr17	75675563	75679720	7.79	8.31	6.99	1.32	0.00191	0.0646	167.15	466	130.68	123.05
chr9	96135324	96137030	5.08	5.72	3.93	1.79	0.00192	1	36.31	69	18.22	12.22
chr5	104806607	104811139	7.02	7.54	6.21	1.33	0.00193	0.065	156.57	215	98.21	49.74
chrX	64518224	64521039	4.48	5.2	2.96	2.25	0.00194	1	47.65	26	10.3	5.24
chr1	147627939	147629853	4.95	5.63	3.61	2.02	0.00195	1	27.99	71	16.63	7.85
chr8	45540043	45541568	6.34	6.98	5.17	1.82	0.00195	0.0653	49.16	204	30.89	41.02
chr16	80009533	80011667	4.13	2.36	4.9	-2.54	0.00196	1	5.29	5	37.22	22.69
chr8	35079859	35081881	5.03	5.67	3.82	1.85	0.00199	1	31.01	71	13.46	14.84
chrX	152143662	152146229	4.61	5.32	3.17	2.15	0.00201	1	53.7	26	11.88	6.11
chr19	14727909	14734286	7.69	8.11	7.1	1.01	0.00207	0.069	300.27	253	156.02	118.69
chr2	80676318	80677451	4.85	5.55	3.45	2.1	0.00209	1	32.52	61	17.42	4.36
chr11	57726607	57728520	5.75	6.3	4.83	1.48	0.00209	1	77.9	80	34.06	22.69
chr3	9573162	9574488	4.56	5.25	3.21	2.04	0.00211	1	43.11	33	7.13	11.35
chr7	19884691	19886992	5.62	6.2	4.63	1.58	0.00213	1	55.21	92	29.3	20.07
chr7	73738171	73739830	5.92	6.49	4.98	1.51	0.00215	1	64.29	115	32.47	30.54
chr2	13443619	13448883	7.28	7.79	6.49	1.31	0.00215	0.0712	177.74	266	121.97	57.6
chr5	131725494	131727460	5.5	6.14	4.32	1.82	0.00215	1	34.04	107	18.22	21.82
chr17	67099116	67100941	5.7	6.26	4.79	1.47	0.00216	1	70.34	83	22.97	32.29
chr19	5443060	5478315	9.88	10.19	9.49	0.69	0.00218	0.0718	1097.47	1231	864.07	575.11
chr8	109493058	109498607	7.59	8.09	6.81	1.28	0.0022	0.072	175.47	369	140.18	84.65
chr17	76290129	76292632	6	6.56	5.07	1.5	0.0022	1	67.32	122	36.43	30.54
chrX	100845353	100847005	5.27	5.84	4.29	1.55	0.00221	1	62.78	52	19.01	20.07
chr19	41567025	41574640	8.08	8.45	7.59	0.86	0.00224	0.0727	348.68	351	197.21	187.63
chr19	37463673	37475460	8.53	8.87	8.09	0.77	0.00224	0.0727	454.57	479	258.98	287.12
chr4	61773251	61775222	5.66	6.31	4.43	1.88	0.00226	1	31.77	127	22.97	20.07
chr4	57810291	57812075	6.24	6.78	5.37	1.41	0.00226	0.0728	83.2	137	45.14	37.53
chr10	67817794	67820669	5.47	6.06	4.45	1.6	0.00226	1	86.98	46	23.76	20.07
chr10	9223175	9224372	6.09	6.71	4.99	1.73	0.00228	1	48.41	161	29.3	34.04
chr17	64147610	64150686	7.07	7.57	6.29	1.27	0.00228	0.073	130.09	249	77.62	79.42
chr2	78854953	78857858	5.66	6.22	4.74	1.47	0.00229	1	72.61	76	31.68	21.82
chr8	32482350	32486940	7.3	7.76	6.61	1.15	0.0023	0.0734	180.77	253	114.84	81.16
chr2	117764306	117765704	5.41	6.04	4.28	1.75	0.00235	1	42.36	89	11.88	27.05
chr5	3338037	3340230	6.06	6.6	5.21	1.39	0.00236	1	100.6	93	43.56	30.54
chr18	23351333	23354015	6.08	6.61	5.23	1.38	0.00237	1	86.98	109	32.47	42.76
chr10	32703821	32705790	6.21	6.79	5.22	1.57	0.00239	0.0757	70.34	151	47.52	27.05
chr19	16968502	16978676	8.3	8.69	7.75	0.94	0.0024	0.0757	468.18	360	263.73	166.68
chr12	8638927	8643329	6.2	6.73	5.34	1.39	0.00245	0.0767	89.25	123	33.26	48
chr14	97079609	97084918	7.09	7.57	6.37	1.2	0.00246	0.0767	144.46	235	86.33	79.42
chr13	45922303	45924561	6.5	7.05	5.58	1.47	0.00248	0.0768	82.44	183	55.44	40.14
chrX	94326465	94328684	5.21	5.81	4.18	1.63	0.0025	1	43.11	69	20.59	15.71
chr5	16944161	16946965	6.37	6.91	5.5	1.41	0.0025	0.0771	83.2	157	45.94	44.51
chr19	5304347	5307352	5.93	6.46	5.08	1.38	0.0025	1	88.49	88	37.22	30.54
chr9	36034971	36036933	5.25	5.89	4.07	1.82	0.00251	1	31.77	87	20.59	13.09
chr1	10246739	10248526	5.58	6.25	4.29	1.96	0.00253	1	25.72	127	18.22	20.94
chr11	9945169	9947945	6.12	6.7	5.15	1.55	0.00256	1	133.12	75	48.31	22.69
chr1	185601816	185603707	5.73	6.33	4.69	1.64	0.00257	1	46.89	114	22.97	28.8
chr2	50317314	50320517	6.33	6.91	5.34	1.57	0.00259	0.0793	65.05	175	43.56	37.53
chr16	8810252	8811717	6.12	6.72	5.07	1.65	0.0026	1	57.48	153	41.98	25.31
chr5	92794609	92798996	6.95	7.44	6.18	1.26	0.00262	0.0794	123.29	225	76.03	68.94
chr5	105734479	105736379	6.34	6.94	5.27	1.67	0.00262	0.0794	55.21	191	37.22	40.14
chr19	33400891	33403501	6.1	6.62	5.28	1.34	0.00265	1	97.57	99	34.06	43.63
chr10	68438461	68440367	5.62	6.21	4.6	1.6	0.00268	1	47.65	100	27.72	20.94
chr17	79395944	79398450	5.89	6.42	5.04	1.38	0.00271	1	77.9	93	32.47	33.16
chr12	36354566	36358215	7.02	7.55	6.18	1.38	0.00271	0.0818	108.92	267	79.99	64.58
chr7	134207935	134211581	6	6.52	5.17	1.35	0.00274	1	86.98	97	38.81	33.16
chr6	128544265	128548475	6.88	7.37	6.14	1.23	0.00275	0.0825	127.82	203	63.36	77.67
chr17	67498535	67500455	4.82	5.45	3.66	1.79	0.00276	1	44.63	43	8.71	16.58
chr7	95390139	95393460	6.11	6.66	5.2	1.46	0.00279	1	69.58	133	40.39	33.16
chr13	23537424	23539536	5.74	6.28	4.88	1.4	0.0028	1	77.9	77	31.68	27.05
chr10	108017492	108021011	6.34	6.86	5.52	1.34	0.0028	0.0837	143.71	89	48.31	43.63
chr2	59232552	59234443	5.82	6.38	4.9	1.48	0.0028	1	86.98	80	39.6	20.07
chr3	78956413	78957931	5.87	6.42	4.98	1.44	0.00286	1	65.8	105	32.47	30.54
chr14	84571102	84572461	4.27	5	2.73	2.27	0.00288	1	24.96	39	7.13	6.11
chr2	30771573	30776606	7	7.45	6.35	1.1	0.00289	0.0859	164.13	186	79.99	82.91
chr7	73742464	73744293	5.64	6.25	4.56	1.69	0.00292	1	47.65	105	32.47	14.84
chr2	79396529	79398365	5.33	6	4.06	1.94	0.00292	1	28.74	99	23.76	9.6
chr5	101548975	101552057	6.43	6.98	5.55	1.43	0.00292	0.0862	79.42	173	42.77	50.62
chr2	34597351	34600250	5.73	6.28	4.82	1.46	0.00293	1	68.83	87	34.85	21.82
chr10	54533541	54536556	6.41	6.94	5.57	1.37	0.00293	0.0862	86.98	158	44.35	50.62
chr4	26669132	26670134	4.76	5.5	3.17	2.33	0.00296	1	13.61	77	11.88	6.11
chr17	61366508	61368967	5.85	6.44	4.8	1.64	0.00299	1	49.16	125	34.06	21.82
chr5	81790354	81793878	6.97	7.49	6.15	1.34	0.00299	0.0874	132.36	227	94.25	48
chr15	6920391	6922264	5.57	6.11	4.68	1.43	0.00301	1	76.39	62	26.14	25.31
chr14	98511490	98512719	4.85	5.53	3.52	2.01	0.00306	1	23.45	69	15.05	7.85
chr17	71074952	71080149	7.59	8.06	6.9	1.16	0.00307	0.0886	189.85	344	91.87	146.61
chr2	56939661	56941833	4.25	4.97	2.74	2.23	0.00309	1	31.77	31	5.54	7.85
chr9	66835660	66839385	7.48	7.91	6.86	1.05	0.0031	0.0886	227.66	253	140.18	91.63
chr9	23497254	23500829	6.79	7.3	6.01	1.29	0.00313	0.0886	111.18	203	71.28	57.6
chrX	165382008	165385566	6.69	7.25	5.79	1.46	0.00314	0.0886	136.9	167	82.37	27.93
chr4	89173011	89175968	6.43	6.95	5.6	1.34	0.00314	0.0886	93.03	154	56.23	41.02
chr3	58113533	58115642	7	7.54	6.14	1.39	0.00315	0.0886	106.65	265	84.74	56.73
chr5	93191841	93194259	6.08	6.61	5.24	1.37	0.00315	1	85.47	110	45.14	30.54
chrX	162739743	162741769	6.37	6.93	5.43	1.5	0.00315	0.0886	86.98	157	59.4	27.05
chr14	106201018	106205123	6.82	7.28	6.14	1.14	0.00315	0.0886	147.49	163	74.45	66.32
chr2	38657582	38659774	4.83	5.45	3.73	1.73	0.00316	1	38.57	49	14.26	12.22
chr15	34948595	34954466	7.45	7.92	6.73	1.19	0.00318	0.0889	170.94	315	129.89	82.91
chr15	81089884	81091873	5.51	6.09	4.54	1.55	0.0032	1	62.78	73	31.68	14.84
chr17	75217920	75220615	6.4	6.92	5.57	1.35	0.00322	0.0896	87.74	154	43.56	51.49
chr18	7234897	7236807	5.41	5.97	4.48	1.48	0.00323	1	52.19	73	22.97	21.82
chr16	45070300	45072405	6.14	6.71	5.18	1.52	0.00324	1	71.85	137	48.31	24.44
chrX	156287194	156289038	4.97	5.57	3.93	1.65	0.00327	1	52.19	43	18.22	12.22
chr5	32048871	32050865	5.17	5.77	4.14	1.62	0.00328	1	40.84	68	21.38	13.96
chr6	65555919	65559739	7.14	7.66	6.33	1.33	0.00329	0.0911	121.02	283	95.83	64.58
chr2	43760452	43761652	4.23	4.96	2.73	2.23	0.0033	1	34.04	28	7.13	6.11
chr12	8187042	8190141	6.72	7.19	6.01	1.18	0.0033	0.0911	133.12	159	56.23	72.43
chr3	118790670	118793036	5.9	6.44	5.03	1.41	0.00334	1	72.61	101	26.14	39.27
chr8	47953334	47955828	6.34	6.85	5.53	1.32	0.00336	0.0917	91.52	139	51.48	41.02
chr11	58114417	58117787	6.42	6.92	5.66	1.26	0.00337	0.0917	101.35	141	51.48	49.74
chr19	24644346	24653010	8	8.41	7.44	0.96	0.00337	0.0917	300.27	378	213.05	135.27
chr2	96453571	96455611	5.78	6.34	4.84	1.5	0.00338	1	62.02	100	36.43	20.94
chr10	43798454	43799501	5.56	6.15	4.56	1.59	0.00341	1	62.78	79	34.06	13.09
chr13	89817869	89819477	4.71	5.37	3.45	1.92	0.00342	1	27.99	55	7.92	13.96
chr9	95523374	95525467	5.88	6.46	4.91	1.55	0.00342	1	52.94	123	26.14	34.04
chr11	50022282	50028947	7.92	8.3	7.4	0.9	0.00343	0.0928	273.04	358	175.03	162.32
chr19	18923084	18928192	7.4	7.9	6.65	1.25	0.00346	0.0929	139.93	337	106.13	94.25
chr1	82807759	82809171	4.71	5.37	3.42	1.95	0.00348	1	24.96	58	11.88	9.6
chr6	50204137	50205345	5.74	6.33	4.69	1.64	0.00349	1	42.36	119	22.97	28.8
chr6	124751116	124758578	7.92	8.37	7.26	1.11	0.00349	0.0929	210.27	453	135.43	171.92
chr2	5206003	5208692	6.93	7.41	6.2	1.21	0.0035	0.0929	148.25	192	92.66	54.11
chr1	133356850	133358504	5.36	5.99	4.25	1.74	0.0035	1	31.77	95	21.38	16.58
chr1	170526851	170530290	6.25	6.76	5.44	1.32	0.00351	0.0929	85.47	132	44.35	42.76
chr8	112273527	112276352	6.84	7.37	5.98	1.39	0.00351	0.0929	99.08	232	76.03	50.62
chr7	100402537	100403779	5.16	5.76	4.13	1.62	0.00352	1	37.06	71	15.84	19.2
chr2	142583533	142585215	5.82	6.37	4.94	1.42	0.00352	1	71.85	93	38.02	23.56
chr3	133821936	133823363	5.13	5.74	4.08	1.65	0.00356	1	35.55	71	19.01	14.84
chr12	79870106	79871906	6.44	6.95	5.63	1.32	0.00357	0.0939	97.57	150	38.81	60.22
chr3	95466802	95472213	7.52	7.92	6.96	0.96	0.00358	0.0939	255.65	228	121.18	128.29
chr7	20402384	20404346	5.57	6.11	4.7	1.41	0.00359	1	71.85	66	29.3	22.69
chr18	23664069	23666166	5.72	6.27	4.84	1.42	0.00359	1	71.1	83	35.64	21.82
chrX	127017044	127019067	5.35	5.93	4.34	1.59	0.00361	1	40.09	82	22.18	18.33
chr7	98739166	98741210	5.14	5.72	4.16	1.56	0.00361	1	41.6	64	17.42	18.33
chrX	161799548	161801657	5.33	5.96	4.18	1.78	0.00361	1	29.5	95	21.38	14.84
chr6	90847267	90849125	4.69	3.51	5.33	-1.81	0.00362	1	9.83	13	34.06	46.25
chr16	87347687	87349441	5.8	6.37	4.84	1.53	0.00362	1	50.68	115	28.51	28.8
chr16	84789032	84791299	5.37	5.94	4.42	1.52	0.00362	1	47.65	75	17.42	25.31
chr7	88326396	88329294	6.49	7.01	5.67	1.34	0.00362	0.0942	100.6	157	64.15	37.53
chr11	32243569	32247672	7.53	7.94	6.97	0.97	0.00363	0.0942	266.99	224	136.22	114.32
chr2	147569677	147570845	5.73	6.29	4.8	1.49	0.00363	1	61.26	95	35.64	20.07
chr14	65281627	65283681	5.14	5.71	4.19	1.52	0.00365	1	47.65	57	18.22	18.33
chr9	47397149	47399042	6.67	7.2	5.82	1.38	0.00366	0.0943	91.52	203	66.53	46.25
chrX	85369871	85371854	5.24	5.82	4.23	1.6	0.00366	1	58.24	55	26.14	11.35
chr10	66390184	66392198	6.7	7.19	5.96	1.23	0.00367	0.0943	111.18	181	65.74	58.47
chr7	148579917	148581472	4.65	3.24	5.35	-2.11	0.00369	1	15.88	3	38.81	42.76
chr7	25982137	25983488	5.11	5.69	4.13	1.56	0.0037	1	42.36	61	15.84	19.2
chr19	12078608	12088356	8.42	8.79	7.93	0.85	0.0037	0.0943	528.69	355	271.65	217.3
chr17	69845036	69846968	5.69	6.32	4.56	1.76	0.00371	1	36.31	123	16.63	30.54
chr1	13628473	13630933	6.44	7.01	5.48	1.53	0.00371	0.0943	65.05	193	49.9	39.27
chr19	53473385	53484432	8.17	8.54	7.68	0.86	0.00372	0.0943	388.01	355	169.49	239.99
chr5	81653683	81656801	6.47	7	5.63	1.37	0.00373	0.0943	85.47	170	56.23	42.76
chr15	99389794	99393108	6.29	6.81	5.47	1.34	0.00375	0.0944	93.03	131	54.65	34.04
chr13	88944637	88947095	5.9	6.46	4.97	1.49	0.00376	1	56.73	119	27.72	34.91
chr15	101845301	101849099	7.18	7.64	6.51	1.13	0.00377	0.0945	152.78	247	79.99	102.11
chr19	61302020	61304313	5.18	5.75	4.22	1.53	0.00378	1	44.63	63	20.59	16.58
chr16	26210381	26212404	6.14	6.72	5.16	1.56	0.00381	1	73.37	138	51.48	20.07
chr16	55242534	55244319	5.7	6.35	4.5	1.85	0.00383	1	27.99	135	19.8	25.31
chr17	76334701	76337430	6.71	7.19	6	1.19	0.00383	0.0954	118.75	173	62.57	65.45
chr8	58818638	58822613	7.11	7.61	6.33	1.27	0.00384	0.0954	117.99	272	78.41	82.91
chr9	71786750	71788893	5.82	6.35	4.98	1.37	0.00386	1	80.93	82	24.55	38.4
chr14	64986683	64988099	5.18	5.74	4.25	1.5	0.00386	1	52.19	55	21.38	16.58
chr17	71094878	71099285	7.57	7.98	7	0.98	0.00389	0.0954	210.27	295	129.1	126.54
chr15	64053691	64056027	6.64	7.14	5.86	1.29	0.00391	0.0954	106.65	176	69.7	46.25
chr17	44903486	44908821	7.57	8.02	6.93	1.09	0.00393	0.0954	179.26	339	121.97	121.3
chr7	104276831	104277949	4.97	5.6	3.81	1.79	0.00395	1	27.99	69	16.63	11.35
chr13	96409626	96412753	7.02	7.48	6.33	1.15	0.00395	0.0954	154.3	203	97.42	63.71
chr9	99619990	99621612	5.84	6.42	4.86	1.56	0.00396	1	47.65	124	29.3	28.8
chr3	132627039	132629905	6.78	7.28	6.01	1.27	0.00397	0.0954	112.7	199	51.48	77.67
chr5	15550982	15551846	4.28	5.06	2.41	2.65	0.00397	1	9.83	57	7.13	3.49
chr7	68558826	68561795	6.19	6.77	5.2	1.57	0.00398	0.0954	123.29	95	57.02	16.58
chr12	43049178	43052067	6.9	7.46	5.96	1.5	0.00398	0.0954	79.42	273	70.49	54.11
chr4	77879279	77882990	6.81	7.37	5.86	1.51	0.00398	0.0954	83.2	248	75.24	41.02
chr13	14588600	14590890	6.35	6.91	5.41	1.49	0.00399	0.0954	71.1	169	53.86	31.42
chrX	143868971	143870920	5.05	5.66	3.99	1.67	0.00399	1	52.19	49	22.97	8.73
chr7	63804585	63805740	4.88	5.53	3.66	1.86	0.00401	1	27.23	65	16.63	8.73
chr9	52523661	52526089	5	4.02	5.58	-1.56	0.00401	1	14.37	18	45.94	49.74
chr1	52310664	52311941	5.33	5.94	4.27	1.67	0.00405	1	35.55	87	23.76	14.84
chr5	104802957	104804894	5.84	6.4	4.92	1.48	0.00408	1	62.02	107	38.81	21.82
chr4	136125128	136126741	5.04	5.65	3.99	1.66	0.00408	1	33.28	67	14.26	17.45
chr17	75508863	75511266	7.65	8.11	6.95	1.16	0.0041	0.0964	167.15	386	121.18	126.54
chr13	23712679	23714653	5.21	5.77	4.3	1.47	0.0041	1	55.21	54	16.63	22.69
chr9	78470053	78472424	6.29	6.82	5.47	1.35	0.00411	0.0964	92.28	133	56.23	32.29
chr19	55055878	55059898	6.79	7.28	6.05	1.23	0.00411	0.0964	156.57	154	45.14	87.27
chr1	106746142	106747864	5.18	5.74	4.25	1.49	0.00412	1	59.75	47	19.8	18.33
chr14	47990670	47997055	7.63	8.02	7.11	0.91	0.00412	0.0964	251.87	266	140.98	134.4
chr9	62883952	62886402	6.32	6.9	5.36	1.54	0.00413	0.0964	64.29	174	51.48	30.54
chrX	16529428	16532724	6.4	6.92	5.58	1.34	0.00413	0.0964	105.13	137	63.36	32.29
chrX	137873037	137875363	5.82	6.36	4.92	1.45	0.00416	1	93.79	71	40.39	20.07
chr5	14077022	14078867	4.88	5.48	3.86	1.62	0.00417	1	43.11	46	15.05	13.96
chr15	80642710	80644555	5.3	5.85	4.4	1.44	0.00417	1	52.19	63	21.38	20.94
chr8	51167014	51168195	4.71	5.42	3.23	2.19	0.00418	1	18.91	67	3.96	14.84
chr3	136303057	136307070	6.77	7.32	5.87	1.45	0.0042	0.0976	86.98	233	73.66	43.63
chr14	76228901	76231539	5.67	6.21	4.81	1.41	0.0042	1	86.22	62	33.26	22.69
chr1	196734480	196736633	5.91	6.48	4.96	1.52	0.00422	1	55.97	123	22.97	39.27
chr3	151013678	151016738	6.93	7.42	6.18	1.24	0.00423	0.0978	113.45	230	75.24	69.82
chr3	126571948	126573406	5.87	6.41	4.98	1.43	0.00429	1	58.24	112	32.47	30.54
chr15	59310537	59314008	7.51	7.95	6.87	1.07	0.00429	0.0989	206.49	287	146.52	88.14
chr4	150172321	150175028	6.79	7.3	6	1.3	0.00431	0.099	108.16	207	78.41	49.74
chr19	37131297	37133536	5.94	6.46	5.11	1.35	0.00431	1	103.62	73	40.39	28.8
chr9	82994069	82998276	6.99	7.46	6.27	1.19	0.00433	0.0991	135.39	217	92.66	61.96
chr3	79618879	79620547	4.61	3.42	5.26	-1.84	0.00438	1	11.35	10	45.14	31.42
chr1	6613555	6615555	6.11	6.72	5.03	1.69	0.00439	1	42.36	169	26.93	38.4
chr11	17367741	17369757	6.21	6.77	5.26	1.51	0.00443	0.101	71.85	147	53.06	23.56
chr11	83084525	83087043	6.53	7	5.81	1.19	0.00444	0.101	115.72	141	63.36	48.87
chr2	32725173	32727116	6.11	6.61	5.32	1.29	0.00444	1	80.93	115	38.02	41.89
chr4	76070312	76072120	5.52	6.08	4.59	1.49	0.00444	1	46.14	89	24.55	23.56
chr11	33559592	33561467	5.86	6.38	5.06	1.32	0.00447	1	95.3	71	32.47	34.04
chr19	5515067	5518257	6.11	6.69	5.14	1.55	0.0045	1	86.98	119	53.86	16.58
chr2	62562863	62564885	5.35	5.98	4.19	1.8	0.00454	1	29.5	97	11.09	25.31
chrX	104355024	104357004	5.12	5.68	4.2	1.48	0.00464	1	47.65	55	16.63	20.07
chr15	54317878	54319042	5.16	5.77	4.09	1.69	0.00464	1	29.5	80	17.42	16.58
chr15	63231128	63233194	5.49	6.05	4.55	1.5	0.00465	1	47.65	85	28.51	18.33
chr1	63948681	63950522	5.01	5.59	4.04	1.54	0.00465	1	46.14	50	19.01	13.96
chr2	32313912	32315087	5.42	6.05	4.29	1.76	0.00467	1	27.23	105	19.8	19.2
chr13	23661192	23668710	7.28	7.69	6.71	0.98	0.00468	0.106	204.97	208	97.42	111.7
chr17	74616348	74618127	5.3	5.85	4.4	1.45	0.00468	1	48.41	67	22.97	19.2
chr13	109608708	109611293	6.23	6.75	5.42	1.32	0.00469	0.106	77.9	137	39.6	46.25
chr2	45569248	45570839	5.82	6.38	4.87	1.51	0.00471	1	49.92	117	33.26	25.31
chr2	124134348	124137590	7.58	8.06	6.84	1.22	0.00474	0.106	144.46	391	113.26	116.07
chr19	18964455	18966296	7.27	7.73	6.59	1.13	0.00477	0.107	157.32	267	115.63	77.67
chr10	67711080	67712760	5.87	6.41	5.01	1.4	0.00479	1	65.05	105	25.34	39.27
chr10	21520205	21522299	6.48	7.01	5.63	1.38	0.0048	0.107	83.2	175	60.98	38.4
chr18	73547274	73549096	4.61	3.42	5.25	-1.84	0.00482	1	11.35	10	30.1	46.25
chr9	75287938	75289874	5.31	5.87	4.38	1.49	0.00482	1	58.24	59	27.72	13.96
chr6	96536782	96538192	5.13	5.77	3.97	1.8	0.00484	1	24.2	85	18.22	13.09
chr1	122032432	122034034	6.46	7.04	5.5	1.54	0.00485	0.107	59.75	203	38.81	51.49
chr14	21742612	21745207	6.45	6.92	5.74	1.19	0.00486	0.107	112.7	130	59.4	47.13
chr10	57783409	57787740	7.66	8.1	7.04	1.06	0.00488	0.107	195.14	352	151.27	111.7
chr1	53776847	53778878	5.94	6.52	4.95	1.57	0.00489	1	46.14	137	27.72	34.04
chr3	12217359	12218565	4.88	5.57	3.54	2.03	0.0049	1	15.88	79	11.88	11.35
chr19	21848028	21848910	4.74	5.39	3.52	1.86	0.00492	1	25.72	58	14.26	8.73
chr12	8076790	8078603	5.58	6.12	4.71	1.41	0.00493	1	68.83	70	18.22	34.04
chr11	20165222	20168861	6.84	7.29	6.16	1.14	0.00494	0.108	127.07	187	64.94	77.67
chr10	27937097	27939206	4.4	3.07	5.08	-2.01	0.00494	1	9.83	7	38.81	28.8
chr1	186498737	186501271	6.24	6.82	5.25	1.57	0.00496	0.108	53.7	173	30.1	46.25
chr19	29897605	29903767	7.52	7.91	6.97	0.94	0.00499	0.108	249.6	232	110.88	140.5
chr3	65437114	65438716	5.87	6.39	5.06	1.33	0.00499	1	74.88	93	39.6	27.05
chr4	25812636	25814854	4.8	5.45	3.59	1.86	0.005	1	22.69	65	11.88	12.22
chr13	31609693	31612167	6.72	7.22	5.95	1.27	0.00501	0.108	128.58	169	39.6	83.78
chr2	65390667	65392622	5.15	5.72	4.17	1.56	0.00501	1	62.78	43	23.76	12.22
chr10	36202380	36204411	5.27	5.83	4.31	1.52	0.00501	1	49.16	65	12.67	27.05
chr14	99847933	99850109	5.37	5.92	4.47	1.46	0.00501	1	58.24	63	28.51	15.71
chr7	5491419	5494643	6.17	6.73	5.22	1.52	0.00502	1	93.03	120	57.02	17.45
chr5	12548289	12550979	5.93	6.55	4.81	1.73	0.00506	1	34.04	153	30.89	25.31
chr2	14199334	14201855	6.59	7.06	5.88	1.18	0.00506	0.109	108.16	159	59.4	58.47
chr12	16905785	16909036	6.47	6.95	5.74	1.21	0.00506	0.109	100.6	146	55.44	51.49
chr7	87930224	87936367	7.4	7.81	6.84	0.97	0.00509	0.109	195.9	253	108.5	120.43
chr2	29626553	29629190	6.08	6.6	5.23	1.37	0.00512	1	66.56	128	40.39	34.91
chr3	30159057	30160659	4.87	5.45	3.87	1.59	0.00513	1	44.63	43	13.46	15.71
chr1	50563461	50567446	5.94	6.49	5.07	1.42	0.00515	1	58.24	121	35.64	31.42
chr11	83828409	83830754	5.98	6.48	5.21	1.27	0.00515	1	80.93	97	36.43	37.53
chrX	70987942	70991279	5.4	5.95	4.48	1.47	0.00516	1	80.93	43	24.55	20.07
chr11	63272808	63274873	5.03	5.63	3.98	1.65	0.00519	1	70.34	29	15.05	16.58
chr13	81320047	81321908	5.3	5.84	4.42	1.42	0.00524	1	56.73	58	25.34	17.45
chr18	76050536	76051701	3.8	1.65	4.63	-2.98	0.00524	1	5.29	1	10.3	39.27
chr12	52982952	52984916	5.79	6.32	4.95	1.37	0.00525	1	64.29	95	36.43	25.31
chr6	52630230	52633614	6.35	6.88	5.51	1.37	0.00525	0.112	83.96	151	31.68	59.34
chr5	97825183	97827860	6.81	7.31	6.06	1.25	0.00527	0.112	121.77	195	86.33	47.13
chr17	16606502	16607740	5.27	5.86	4.23	1.63	0.00528	1	35.55	81	24.55	13.09
chr2	51769875	51771398	6.23	6.82	5.21	1.61	0.00529	0.112	46.14	180	36.43	37.53
chr4	149006605	149007938	4.56	5.22	3.29	1.93	0.00531	1	29.5	45	13.46	6.11
chr4	132031664	132032891	5.2	5.76	4.27	1.5	0.00534	1	47.65	61	24.55	13.96
chr5	10780279	10783542	6.13	6.66	5.29	1.37	0.00535	1	66.56	135	38.02	40.14
chr12	9373536	9377250	6.11	6.61	5.32	1.29	0.00537	1	80.93	115	46.73	33.16
chr2	132034270	132038876	7.32	7.73	6.72	1.01	0.00537	0.113	204.97	221	125.93	85.52
chr4	11916435	11917999	5.66	6.23	4.68	1.55	0.00537	1	49.16	101	34.85	16.58
chr16	76958212	76959829	5.34	5.99	4.15	1.84	0.0054	1	21.93	105	19.8	15.71
chr15	44242608	44245823	6.94	7.41	6.24	1.17	0.00541	0.113	127.07	213	87.91	63.71
chr17	17735866	17740518	6.66	7.17	5.88	1.29	0.00541	0.113	90.76	197	58.61	59.34
chr4	106904198	106905878	5.25	5.79	4.37	1.43	0.00544	1	49.92	61	22.97	18.33
chr15	64919746	64922252	4.97	5.53	4.02	1.52	0.00544	1	47.65	45	16.63	15.71
chr4	4561393	4564151	6.69	7.22	5.84	1.38	0.00544	0.113	90.01	208	73.66	41.02
chr18	32830659	32832596	4.33	2.89	5.04	-2.15	0.00546	1	3.78	11	22.97	42.76
chr5	13973547	13977864	7.06	7.55	6.32	1.23	0.00546	0.113	130.85	244	102.17	57.6
chr9	38387452	38390171	5.23	5.82	4.2	1.62	0.00547	1	36.31	77	24.55	12.22
chr17	27277608	27280040	6.43	5.73	6.9	-1.17	0.00548	0.113	55.21	51	108.5	130.03
chr17	63021129	63028509	7.57	7.96	7.04	0.91	0.00549	0.113	223.88	273	126.72	137.01
chr3	61018701	61022987	7.05	7.51	6.38	1.12	0.00553	0.114	230.69	133	75.24	91.63
chr10	123574431	123576397	5.53	6.11	4.56	1.55	0.00554	1	52.94	85	34.06	13.09
chr10	102121272	102124165	7.01	7.49	6.3	1.18	0.00556	0.114	120.26	239	84.74	73.31
chr7	150467645	150469488	4.57	3.24	5.25	-2.01	0.00558	1	12.86	6	22.97	53.23
chr5	118907806	118909718	5.41	6.03	4.3	1.73	0.00558	1	63.53	67	33.26	6.11
chr15	59806577	59807617	4.49	5.15	3.23	1.92	0.0056	1	34.04	37	12.67	6.11
chr18	68899068	68900874	4.62	3.43	5.26	-1.83	0.00563	1	10.59	11	26.93	49.74
chr13	92842028	92844418	5.78	6.3	4.98	1.32	0.00566	1	65.05	92	32.47	30.54
chr17	81170928	81173117	6.11	6.61	5.36	1.25	0.00566	1	86.98	108	34.85	47.13
chr15	70472835	70474846	4.92	5.51	3.92	1.59	0.00568	1	40.09	51	11.09	19.2
chr15	76634865	76636858	4.55	5.19	3.36	1.83	0.00571	1	40.09	33	12.67	7.85
chr3	103710696	103714051	7.23	7.69	6.55	1.14	0.00572	0.117	136.9	276	93.46	94.25
chr1	152169740	152172056	5.8	6.31	4.99	1.32	0.00577	1	65.8	93	27.72	35.78
chr1	53894373	53896016	5.35	5.88	4.5	1.39	0.00579	1	52.19	66	19.8	25.31
chr2	71380158	71382551	6.21	6.7	5.47	1.23	0.0058	0.118	86.98	121	44.35	44.51
chr5	22719385	22721313	5.54	6.1	4.6	1.51	0.0058	1	44.63	93	30.1	18.33
chr18	36716997	36721057	7.34	6.71	7.78	-1.07	0.00587	0.119	121.77	87	165.53	274.03
chrX	95463707	95464961	4.45	5.16	3.02	2.14	0.00587	1	20.42	51	11.88	4.36
chr3	59094220	59095744	5.74	6.3	4.81	1.48	0.00589	1	46.14	111	30.1	26.18
chr1	162480287	162481790	5.02	5.62	3.97	1.65	0.00591	1	29.5	69	17.42	13.96
chr12	91404176	91405410	5.55	6.16	4.45	1.71	0.00592	1	40.09	103	33.26	10.47
chr4	93547600	93548690	5.52	6.14	4.4	1.75	0.00593	1	26.47	115	23.76	18.33
chrX	124032084	124034371	4.1	4.82	2.56	2.26	0.00594	1	35.55	21	3.96	7.85
chr5	66590639	66592184	5.92	6.42	5.15	1.27	0.00595	1	77.9	93	38.81	32.29
chr13	5004316	5006662	5.61	6.17	4.68	1.49	0.00596	1	43.11	101	27.72	23.56
chr4	55591509	55593063	4.82	5.52	3.42	2.1	0.00598	1	12.86	79	11.88	9.6
chr9	41402662	41404400	5.34	5.9	4.4	1.5	0.00598	1	62.78	57	30.1	12.22
chr8	122209563	122212417	6.4	6.86	5.71	1.15	0.00598	0.12	113.45	119	49.9	54.98
chr4	9824018	9825863	4.88	5.53	3.67	1.85	0.006	1	21.18	71	15.05	10.47
chr15	80389243	80393564	6.81	7.28	6.09	1.19	0.00601	0.12	107.4	204	67.32	68.94
chr5	101032007	101038016	7.31	7.71	6.73	0.98	0.00602	0.12	192.87	227	120.38	92.51
chr9	33664192	33668051	6.58	7.08	5.81	1.26	0.00603	0.12	89.25	181	52.27	60.22
chr2	57033773	57034981	4.79	5.41	3.71	1.7	0.00605	1	31.77	53	9.5	16.58
chr10	97837035	97838101	5.13	5.75	4.03	1.72	0.00605	1	28.74	79	22.18	10.47
chr17	54305307	54308399	6.53	7.08	5.61	1.48	0.00606	0.12	62.02	209	45.94	51.49
chr6	13991569	13996038	7.24	7.75	6.44	1.31	0.00606	0.12	109.67	322	69.7	103.85
chr3	151108300	151109960	6	6.52	5.16	1.36	0.00609	1	62.78	121	32.47	39.27
chr19	5694918	5696662	5.16	5.7	4.28	1.43	0.0061	1	52.19	52	22.18	16.58
chr1	165041181	165045243	7.3	7.73	6.68	1.04	0.00612	0.121	164.89	259	115.63	89.89
chr8	61397256	61398881	4.76	5.36	3.73	1.63	0.00615	1	37.06	45	13.46	13.09
chr17	78790709	78792779	5.76	6.33	4.8	1.53	0.00616	1	45.38	116	34.85	20.94
chr15	90430657	90432903	4.7	5.31	3.62	1.69	0.00617	1	38.57	41	15.05	9.6
chr4	4914012	4915115	4.39	5.14	2.76	2.38	0.0062	1	11.35	59	3.96	9.6
chr11	42995506	42998066	6.38	6.95	5.44	1.51	0.0062	0.122	65.05	182	58.61	27.93
chr15	79764225	79766740	5.74	6.26	4.92	1.34	0.00623	1	59	94	30.1	30.54
chr1	46464982	46466831	5.66	6.26	4.64	1.62	0.00623	1	34.04	119	26.14	23.56
chr7	58949934	58952701	4.97	3.99	5.54	-1.55	0.00626	1	12.86	19	37.22	55.85
chr2	36328808	36330750	5.48	6.07	4.45	1.62	0.00626	1	35.55	99	15.05	28.8
chr9	58816521	58819259	5.63	6.18	4.75	1.43	0.0063	1	47.65	97	28.51	25.31
chrX	100704371	100707514	6.56	7.05	5.82	1.22	0.00631	0.124	111.18	153	72.07	41.02
chr2	47251847	47253514	5.82	6.41	4.82	1.59	0.00631	1	38.57	131	27.72	28.8
chr11	40785822	40786768	4.69	5.33	3.51	1.82	0.00634	1	33.28	47	16.63	6.11
chr8	113707829	113711084	6.88	7.31	6.26	1.05	0.00634	0.124	145.98	171	82.37	70.69
chr13	93521619	93525362	5.3	4.42	5.85	-1.42	0.00634	1	21.93	21	44.35	70.69
chr13	47307883	47310457	5.2	4.22	5.78	-1.56	0.0064	1	21.18	16	76.82	33.16
chr18	42925406	42928855	6.94	7.4	6.26	1.14	0.0064	0.125	120.26	217	73.66	79.42
chr9	66884117	66886108	5.3	5.83	4.43	1.4	0.00644	1	46.14	68	21.38	21.82
chr11	119836787	119838171	6.49	7	5.7	1.3	0.00645	0.125	101.35	155	33.26	70.69
chr3	70607031	70608900	5.96	6.52	5.02	1.5	0.00648	1	49.92	134	39.6	25.31
chr7	56588982	56591525	6.56	7.09	5.71	1.38	0.00648	0.125	121.77	150	78.41	26.18
chr13	23834571	23845542	7.88	8.24	7.41	0.82	0.00648	0.125	283.63	320	181.37	159.7
chr5	10792029	10793868	5.12	5.71	4.09	1.61	0.00649	1	29.5	75	15.84	18.33
chr3	9152995	9155244	5.46	6.03	4.52	1.51	0.00652	1	57.48	73	11.88	34.04
chr13	58755171	58756658	3.58	4.36	1.72	2.65	0.00653	1	21.18	20	3.96	2.62
chr4	116391770	116393922	5.67	6.22	4.78	1.44	0.00657	1	46.14	103	26.14	28.8
chr15	15802032	15805052	6.17	6.76	5.15	1.6	0.00658	1	43.11	173	30.1	41.02
chr7	50917686	50919934	5.39	5.93	4.52	1.41	0.00659	1	68.83	53	29.3	16.58
chr8	32553816	32556891	6.65	7.16	5.87	1.29	0.00663	0.127	85.47	200	60.98	55.85
chr8	109720880	109723093	5.97	6.46	5.22	1.23	0.00663	1	78.66	97	38.02	36.65
chr4	57817199	57818862	5.75	6.28	4.91	1.36	0.00663	1	55.97	99	33.26	27.05
chr15	72639334	72641405	5.12	5.69	4.19	1.5	0.00664	1	52.19	51	11.09	25.31
chr19	21176756	21187225	9	9.28	8.64	0.64	0.00664	0.127	565	679	426.89	370.9
chr6	89517294	89519168	4.83	3.83	5.42	-1.59	0.00665	1	14.37	14	35.64	49.74
chr15	5623190	5626938	6.85	7.33	6.13	1.2	0.00666	0.127	105.13	217	73.66	66.32
chr9	50621283	50625044	6.07	6.62	5.16	1.46	0.00667	1	55.97	141	44.35	27.05
chrX	107121266	107122879	3.97	4.73	2.28	2.44	0.0067	1	37.06	16	7.13	2.62
chr1	72272325	72273999	5.72	6.25	4.9	1.35	0.00673	1	55.97	96	32.47	27.05
chr2	77896429	77899296	6.22	6.7	5.51	1.19	0.00679	0.129	91.52	116	47.52	43.63
chr13	23633223	23638556	6.51	6.96	5.85	1.11	0.00679	0.129	124.04	125	54.65	61.09
chr8	41678339	41682482	6.83	7.29	6.17	1.12	0.00681	0.129	120.26	192	76.82	67.2
chr2	123101557	123104528	6.06	6.61	5.16	1.45	0.00683	1	52.19	143	34.85	36.65
chr13	49085540	49086389	4.06	2.36	4.82	-2.45	0.00684	1	5.29	5	11.88	44.51
chr2	44496365	44498976	5.94	6.47	5.08	1.38	0.00684	1	58.24	119	27.72	40.14
chr2	49664358	49672753	7.78	8.15	7.3	0.85	0.00685	0.129	253.38	313	154.44	160.58
chr5	93408638	93411184	6.62	7.06	5.98	1.08	0.0069	0.13	130.09	137	60.98	65.45
chr12	52948515	52952661	6.89	7.37	6.14	1.23	0.00691	0.13	108.92	223	86.33	54.98
chr11	97914083	97916767	5.19	4.34	5.73	-1.39	0.00691	1	20.42	20	57.82	48
chr2	69033022	69035365	5.46	5.99	4.63	1.36	0.00692	1	53.7	73	28.51	20.94
chr8	93477221	93479848	5.38	5.89	4.56	1.33	0.00695	1	62.78	56	23.76	23.56
chr1	159277368	159279007	5.1	5.67	4.17	1.49	0.00696	1	38.57	63	14.26	21.82
chr8	58805352	58806612	4.3	5	2.9	2.1	0.00697	1	18.91	45	7.92	6.98
chr17	66052529	66053547	4.78	5.4	3.67	1.72	0.00697	1	27.23	57	15.05	10.47
chr2	80558386	80559992	4.41	5.08	3.14	1.94	0.00698	1	44.63	23	7.13	10.47
chr4	44107090	44109355	5.16	5.75	4.13	1.62	0.00699	1	28.74	79	15.05	20.07
chr2	15067324	15069688	5.05	5.62	4.12	1.49	0.00699	1	37.06	61	17.42	17.45
chr3	66617403	66619004	4.56	3.42	5.18	-1.77	0.007	1	11.35	10	31.68	41.02
chrX	120777621	120779206	3.63	4.42	1.68	2.74	0.00706	1	21.93	21	5.54	0.87
chr19	54867297	54871164	6.43	6.9	5.73	1.16	0.00709	0.132	110.43	128	42.77	63.71
chr1	114644116	114646264	5.14	5.77	4.02	1.74	0.0071	1	21.93	87	15.05	17.45
chr13	4770165	4772358	6.46	6.91	5.78	1.13	0.00713	0.132	108.16	133	59.4	50.62
chr3	136093425	136096622	6.78	7.24	6.11	1.13	0.00713	0.132	114.21	188	72.86	65.45
chr5	101645826	101646466	4.73	5.39	3.5	1.89	0.00714	1	18.91	65	9.5	13.09
chr6	119341632	119344653	6.27	6.79	5.45	1.34	0.00714	0.132	68.83	153	49.9	37.53
chr19	29289603	29293166	6.86	7.31	6.18	1.13	0.00715	0.132	118.75	199	64.15	81.16
chr6	23896846	23898221	4.73	5.41	3.4	2.01	0.00718	1	15.88	69	7.13	13.96
chr4	93219258	93220919	5.68	6.29	4.62	1.67	0.00719	1	33.28	123	32.47	16.58
chr2	132817897	132820342	6.1	6.59	5.35	1.24	0.0072	1	88.49	104	49.9	31.42
chr4	53252150	53253291	4.74	5.36	3.62	1.74	0.00721	1	55.21	27	15.84	8.73
chr16	57524530	57526038	5.54	6.1	4.61	1.49	0.00721	1	49.92	87	34.06	14.84
chrX	73008781	73011110	4.32	5.03	2.89	2.14	0.00722	1	49.16	16	8.71	6.11
chr19	5480169	5508268	9.5	9.79	9.13	0.65	0.00723	0.133	859.98	905	685.08	437.22
chr2	11350304	11351876	5.76	6.3	4.91	1.39	0.00724	1	54.46	103	36.43	23.56
chr19	3826901	3836352	8.24	8.58	7.79	0.79	0.00724	0.133	337.33	429	252.65	189.37
chr11	16490460	16492591	5.88	6.39	5.09	1.3	0.00725	1	78.66	89	43.56	24.44
chr2	49350062	49353114	6	6.52	5.19	1.33	0.00727	1	62.02	121	38.81	34.04
chr8	67000530	67002648	6.34	6.9	5.38	1.52	0.00727	0.133	50.68	189	45.94	37.53
chr7	55920392	55922562	4.64	3.56	5.25	-1.69	0.00728	1	13.61	10	38.81	37.53
chr2	91249757	91252119	4.82	5.4	3.84	1.57	0.00728	1	44.63	40	11.09	17.45
chr19	24115818	24117921	3.86	4.62	2.18	2.44	0.00729	1	34.04	15	5.54	3.49
chr3	30807596	30810670	5.2	4.32	5.74	-1.42	0.00729	1	24.96	15	52.27	54.98
chrX	12536496	12537721	4.57	5.22	3.37	1.85	0.0073	1	23.45	51	11.09	9.6
chrX	106764267	106766504	4.1	4.84	2.53	2.3	0.00731	1	43.11	14	6.34	5.24
chr7	91800350	91801514	4.57	5.22	3.38	1.84	0.00732	1	23.45	51	10.3	10.47
chr9	81262639	81264405	5.31	5.93	4.21	1.72	0.00734	1	24.96	97	13.46	23.56
chr6	103302279	103304085	4.89	5.48	3.85	1.63	0.00737	1	61.26	28	15.84	13.09
chr13	58635481	58636575	5.71	6.21	4.92	1.29	0.00738	1	73.37	75	22.97	37.53
chr8	32628771	32633168	6.68	7.18	5.92	1.26	0.00742	0.135	90.01	200	68.11	53.23
chr11	62362165	62365919	7	7.41	6.42	0.99	0.00744	0.135	168.67	172	79.99	91.63
chr6	36357108	36359104	4.85	3.82	5.44	-1.62	0.00755	1	8.32	20	37.22	49.74
chr5	149775961	149778776	6.22	6.73	5.4	1.33	0.00757	0.137	103.62	109	60.19	24.44
chr8	86714862	86718512	7.36	7.76	6.8	0.96	0.00759	0.137	178.5	255	117.22	105.6
chr15	54216728	54219675	7	7.51	6.23	1.28	0.00763	0.137	106.65	257	95.83	54.11
chr8	109146435	109149232	5.82	6.32	5.04	1.29	0.00764	1	80.93	79	41.18	24.44
chr4	140092609	140094459	5.04	5.59	4.15	1.43	0.00766	1	43.11	53	19.01	16.58
chr4	82953361	82956177	5.78	6.29	5	1.29	0.00767	1	60.51	96	32.47	31.42
chr14	95151486	95152569	4.5	5.21	3.04	2.17	0.00769	1	12.86	61	10.3	6.11
chr1	162526196	162527995	5.73	6.3	4.8	1.5	0.00772	1	40.09	117	28.51	27.05
chr9	75773472	75776768	5.95	6.43	5.22	1.22	0.00772	1	86.98	86	31.68	42.76
chr1	64351676	64353001	4.84	5.44	3.8	1.64	0.00775	1	31.77	55	9.5	18.33
chr4	127003787	127006362	5.74	6.29	4.84	1.45	0.00778	1	51.43	105	38.02	19.2
chr4	46651898	46654199	5.4	6	4.37	1.63	0.00778	1	27.99	100	21.38	20.07
chr1	185963943	185965076	5.71	6.26	4.81	1.45	0.00778	1	43.87	109	24.55	31.42
chr2	3429546	3431813	5.6	6.13	4.78	1.35	0.00779	1	50.68	89	26.14	28.8
chr11	54235064	54236640	4.47	5.1	3.31	1.79	0.00779	1	31.77	37	10.3	9.6
chr19	34656416	34675199	8.79	9.07	8.44	0.63	0.0078	0.14	539.28	535	363.53	330.75
chr8	24495742	24497945	4.79	3.79	5.38	-1.59	0.00781	1	16.64	11	38.81	44.51
chr13	55283694	55287487	6.25	6.72	5.57	1.15	0.00782	0.14	94.54	116	46.73	48
chr12	80742001	80744221	5.63	6.13	4.86	1.27	0.00782	1	62.78	77	29.3	28.8
chr2	96330012	96331426	4.57	5.22	3.36	1.86	0.00782	1	23.45	51	12.67	7.85
chr14	102541279	102543381	4.11	4.89	2.33	2.56	0.00784	1	52.19	7	3.96	6.11
chr19	24600766	24604561	6.71	7.14	6.09	1.05	0.0079	0.14	155.05	128	64.94	71.56
chr17	62099666	62100982	5.47	6.06	4.46	1.59	0.00791	1	30.25	103	20.59	23.56
chr7	120737614	120739303	5.46	6.02	4.55	1.47	0.00792	1	41.6	88	29.3	17.45
chr3	116652884	116655962	7.04	7.46	6.44	1.02	0.00793	0.14	142.95	210	86.33	87.27
chr16	55610841	55613748	6.12	6.65	5.26	1.38	0.00793	1	57.48	143	41.98	34.91
chr19	43623975	43627942	7.67	8.08	7.1	0.98	0.00794	0.14	191.36	349	129.1	145.74
chr8	67203849	67208125	7.55	7.97	6.97	1	0.00794	0.14	184.55	317	144.94	105.6
chr17	75029092	75032187	6.42	6.9	5.71	1.18	0.00795	0.14	105.13	133	39.6	65.45
chr8	109163622	109166047	5.96	6.46	5.18	1.29	0.00796	1	69.58	107	43.56	28.8
chr3	57125008	57126007	5.4	5.93	4.55	1.38	0.00798	1	44.63	77	21.38	25.31
chrX	67436364	67440163	6.38	6.88	5.6	1.28	0.00801	0.14	112.7	123	68.11	28.8
chr18	42466829	42469253	6.6	7.05	5.94	1.11	0.00801	0.14	109.67	155	56.23	66.32
chr8	75727888	75729754	4.96	5.54	3.97	1.57	0.00801	1	31.77	61	18.22	13.09
chr7	151526078	151527158	5.03	5.62	4.03	1.6	0.00801	1	35.55	63	22.97	9.6
chr2	84473224	84474597	4.87	5.45	3.87	1.58	0.00807	1	32.52	55	11.88	17.45
chr7	48340216	48341730	3.56	4.34	1.75	2.59	0.00809	1	23.45	17	2.38	4.36
chr6	35558014	35559371	5.01	5.61	3.96	1.65	0.00812	1	26.47	71	11.88	19.2
chr17	75105548	75107166	5.19	5.72	4.34	1.38	0.00815	1	44.63	61	22.18	18.33
chr3	132873057	132875427	6.21	6.67	5.52	1.15	0.00816	0.142	96.81	107	49.1	42.76
chr7	130266334	130268271	5.31	5.85	4.44	1.41	0.00816	1	42.36	73	18.22	25.31
chr12	92266480	92268509	6.69	7.2	5.9	1.3	0.00818	0.142	80.93	214	52.27	67.2
chr9	75691329	75693158	5.37	5.9	4.54	1.36	0.00819	1	46.14	73	22.97	23.56
chr7	5563333	5565157	4.94	5.52	3.92	1.6	0.00822	1	31.01	61	19.01	11.35
chr5	99377957	99381091	5.93	6.42	5.2	1.22	0.00822	1	77.15	94	41.18	32.29
chr17	30186099	30192607	7.14	7.54	6.59	0.94	0.00824	0.143	186.06	185	99	94.25
chr2	44728420	44731472	5.8	6.3	5.03	1.27	0.00825	1	64.29	93	36.43	28.8
chrX	72918600	72920344	5.58	6.11	4.72	1.39	0.00826	1	45.38	93	22.97	29.67
chr1	155149577	155152842	6.01	6.49	5.26	1.23	0.00827	1	73.37	107	41.98	34.91
chr10	124545755	124547225	4.58	5.23	3.36	1.87	0.00828	1	21.93	53	12.67	7.85
chr8	58548633	58550606	5.42	5.98	4.51	1.47	0.00828	1	37.06	89	23.76	21.82
chr7	69222311	69224237	5.87	6.42	4.97	1.45	0.00832	1	46.14	125	34.85	27.93
chr5	20429937	20432210	5.6	6.14	4.75	1.39	0.00834	1	47.65	93	21.38	32.29
chr19	24163554	24167726	6.68	7.11	6.04	1.07	0.00834	0.144	130.85	146	75.24	56.73
chr1	71504278	71505476	4.27	5	2.69	2.31	0.00836	1	15.13	49	10.3	2.62
chr5	4325620	4327817	5.97	6.52	5.09	1.42	0.00837	1	52.94	130	41.98	26.18
chrX	149288970	149290812	4.64	5.28	3.46	1.82	0.00837	1	24.96	53	15.05	6.98
chr2	113461404	113462407	5.9	6.39	5.14	1.25	0.00839	1	80.93	87	43.56	27.05
chr1	185611460	185613203	5.3	5.86	4.37	1.49	0.00842	1	34.79	81	22.97	18.33
chr13	49676211	49680722	6.76	7.22	6.08	1.14	0.00843	0.145	171.69	126	86.33	48.87
chr16	95962753	95964588	5.52	6.1	4.55	1.55	0.00846	1	34.04	103	27.72	19.2
chr10	110002573	110004556	6.06	6.61	5.16	1.45	0.00847	1	136.9	59	49.9	21.82
chr8	10663260	10666476	7	7.47	6.32	1.15	0.00848	0.146	121.02	233	95.83	63.71
chrX	9485695	9488061	5.54	6.05	4.75	1.3	0.00851	1	53.7	79	28.51	25.31
chrX	137796898	137798739	5.59	6.14	4.7	1.43	0.00852	1	53.7	87	36.43	15.71
chr5	86668171	86670350	5.22	5.79	4.29	1.49	0.00853	1	39.33	71	26.14	13.09
chr9	101130506	101132250	5.61	6.11	4.82	1.29	0.00855	1	55.21	83	27.72	28.8
chr8	8486655	8488574	6.34	6.86	5.53	1.33	0.00857	0.147	79.42	153	61.78	30.54
chr4	118004062	118005669	4.64	5.26	3.52	1.74	0.00858	1	29.5	47	15.05	7.85
chr12	53919477	53921701	5.54	6.1	4.62	1.48	0.00861	1	96.06	41	32.47	16.58
chr10	107609266	107611994	5.89	6.42	5.06	1.36	0.00861	1	55.21	116	38.81	27.93
chr11	39458439	39460687	4.51	3.38	5.13	-1.75	0.00861	1	9.83	11	40.39	29.67
chr14	105987075	105989672	6.24	6.74	5.46	1.28	0.00866	0.148	85.47	129	58.61	29.67
chr9	99044272	99046642	5.44	5.96	4.61	1.35	0.00869	1	60.51	64	16.63	32.29
chr2	57411099	57413180	5.07	5.62	4.18	1.44	0.0087	1	58.24	40	22.18	13.96
chr19	5011393	5020538	8.48	8.84	8	0.84	0.0087	0.148	507.52	409	333.43	178.9
chr5	122424569	122426283	4.19	2.84	4.88	-2.04	0.00872	1	5.29	9	22.97	35.78
chr8	55207051	55208503	4.97	5.52	4.08	1.44	0.00872	1	44.63	47	19.01	14.84
chr13	21509129	21510311	4.8	5.38	3.82	1.57	0.00873	1	32.52	51	14.26	13.96
chr18	75741153	75742744	4.35	3.03	5.02	-2	0.00875	1	5.29	11	20.59	44.51
chr9	119174552	119176404	4.75	5.33	3.77	1.56	0.00876	1	39.33	41	15.05	12.22
chr2	126284444	126286344	4.99	5.56	4.03	1.53	0.0088	1	33.28	61	12.67	20.07
chr5	5290905	5291799	4.84	5.42	3.85	1.57	0.0088	1	32.52	53	16.63	12.22
chr2	52796785	52798015	4.99	5.53	4.12	1.41	0.0088	1	47.65	45	18.22	16.58
chr19	32157415	32159182	4.95	5.49	4.05	1.45	0.00881	1	49.16	41	18.22	14.84
chr3	34228475	34234382	7.21	7.6	6.68	0.92	0.00882	0.15	203.46	185	96.62	108.21
chr5	4954228	4955490	4.76	5.35	3.73	1.62	0.00884	1	29.5	52	13.46	13.09
chr11	66844445	66845456	4.69	3.54	5.32	-1.77	0.00886	1	8.32	15	22.97	56.73
chr17	17728891	17731954	6.07	6.59	5.25	1.35	0.00887	1	58.24	135	41.98	34.04
chr7	87032646	87034496	4.29	2.98	4.96	-1.98	0.00888	1	6.81	9	21.38	41.02
chr11	68271114	68273348	5.45	5.97	4.62	1.35	0.00889	1	64.29	61	32.47	16.58
chr9	71923402	71927081	6.69	7.17	5.95	1.22	0.00891	0.151	92.28	196	72.07	51.49
chr17	13202169	13204256	5.68	6.17	4.92	1.25	0.00891	1	61.26	83	30.1	30.54
chr17	75868342	75874200	7.75	8.18	7.12	1.06	0.00895	0.151	168.67	413	144.94	133.52
chr7	54285617	54288534	6.52	6.99	5.81	1.19	0.00897	0.151	93.79	161	65.74	46.25
chr12	11679481	11681106	4.6	5.24	3.41	1.83	0.00899	1	22.69	53	13.46	7.85
chr6	140457130	140458450	5.2	5.78	4.21	1.57	0.00899	1	31.01	79	12.67	24.44
chr1	61527349	61529360	5.49	6.06	4.55	1.51	0.00903	1	86.98	46	11.88	34.91
chrX	19263196	19265088	4.85	5.43	3.89	1.53	0.00905	1	34.04	52	16.63	13.09
chr2	66433846	66436810	6.32	6.81	5.58	1.23	0.00906	0.152	80.17	144	55.44	40.14
chr7	150254605	150256351	5.02	4.14	5.56	-1.41	0.00909	1	14.37	21	44.35	49.74
chr10	16272843	16274168	5.3	5.87	4.36	1.51	0.0091	1	34.04	83	25.34	15.71
chr17	91238241	91240804	6.14	6.72	5.15	1.57	0.00911	1	40.09	171	29.3	41.89
chr15	103050686	103052722	5.98	6.5	5.16	1.34	0.00913	1	55.97	125	33.26	38.4
chr2	45876404	45878275	4.95	5.5	4.05	1.44	0.00919	1	39.33	51	16.63	16.58
chr19	56070141	56071592	5.13	5.67	4.26	1.41	0.00922	1	38.57	63	18.22	20.07
chr13	101864685	101865903	4.67	5.26	3.63	1.63	0.00922	1	31.77	45	13.46	11.35
chr3	140444230	140446187	4.41	3.24	5.04	-1.81	0.00928	1	9.83	9	37.22	28.8
chr6	30647762	30649418	4.63	3.61	5.23	-1.62	0.00928	1	11.35	13	35.64	39.27
chr8	39435856	39438096	5.87	6.42	4.97	1.45	0.0093	1	53.7	118	43.56	19.2
chr3	121032772	121034806	4.96	4.06	5.51	-1.45	0.00932	1	17.4	16	38.02	53.23
chr17	35673377	35675633	5.99	6.58	4.98	1.6	0.00932	1	34.04	157	32.47	30.54
chr1	140411226	140412985	5.95	6.49	5.09	1.4	0.00933	1	53.7	126	42.77	25.31
chr13	94767853	94769280	5.25	5.79	4.39	1.4	0.00934	1	42.36	68	25.34	16.58
chr9	42156983	42158424	4.96	5.52	4.03	1.49	0.00935	1	50.68	41	21.38	11.35
chrX	32004604	32007193	2.62	3.52	-0.26	3.78	0.00937	1	15.88	7	0.79	0.87
chr11	86442146	86444329	6.06	6.55	5.3	1.25	0.00939	1	66.56	121	41.98	36.65
chr17	43640850	43641861	5.05	5.64	4.05	1.58	0.00943	1	26.47	73	16.63	16.58
chr9	22047668	22049596	4.34	4.98	3.13	1.85	0.00945	1	36.31	27	7.92	9.6
chr8	82819439	82821531	4.78	5.36	3.81	1.55	0.00946	1	49.16	33	15.84	12.22
chr3	19350432	19351743	5.78	6.37	4.77	1.6	0.00948	1	50.68	115	11.09	43.63
chr13	15894137	15896819	5.85	6.39	4.96	1.44	0.00948	1	43.87	124	33.26	28.8
chr2	65064224	65069604	7.14	7.56	6.56	1.01	0.00948	0.159	168.67	209	114.84	73.31
chr3	30717595	30721166	6.61	7.11	5.84	1.28	0.00951	0.159	77.15	200	52.27	61.96
chr2	125033892	125038096	6.78	7.26	6.04	1.23	0.00955	0.159	117.99	189	91.08	40.14
chr2	46085480	46087082	5.15	5.73	4.13	1.6	0.00955	1	29.5	77	23.76	11.35
chr8	43088226	43089929	5.13	5.74	4.04	1.7	0.00961	1	21.93	85	20.59	12.22
chr4	88161161	88162893	5	5.54	4.11	1.43	0.00962	1	49.16	44	21.38	13.09
chr11	98194239	98196174	4.69	3.67	5.28	-1.62	0.00974	1	14.37	11	31.68	46.25
chr5	92450380	92452638	4.83	5.39	3.9	1.5	0.00974	1	37.06	47	15.84	13.96
chr15	61970026	61972761	6.04	5.27	6.54	-1.27	0.00977	1	40.09	37	124.34	61.96
chr1	181899173	181901083	6.23	6.7	5.52	1.18	0.00977	0.161	80.17	128	47.52	44.51
chr18	76000239	76001706	4.19	2.79	4.89	-2.1	0.00978	1	6.81	7	16.63	42.76
chr15	8138767	8141433	6.62	7.13	5.83	1.3	0.00979	0.161	85.47	194	74.45	39.27
chr4	88694769	88698926	6.87	7.31	6.25	1.05	0.0098	0.161	127.82	189	87.12	65.45
chr9	70790053	70791328	5.21	5.77	4.3	1.47	0.00981	1	34.04	75	15.84	23.56
chr5	143582458	143586089	6.9	7.32	6.32	1	0.00981	0.161	144.46	175	89.5	69.82
chr18	26363345	26365230	5.84	6.41	4.89	1.52	0.00982	1	37.06	133	26.14	33.16
chr13	22119809	22122143	5.41	5.9	4.64	1.27	0.00983	1	65.8	54	26.14	23.56
chr4	35170327	35171794	4.9	5.48	3.93	1.55	0.00983	1	30.25	59	17.42	13.09
chr5	91958117	91960147	4.85	5.43	3.88	1.55	0.00984	1	49.16	37	19.8	9.6
chr9	37417526	37418745	4.9	5.49	3.87	1.62	0.00984	1	24.96	65	13.46	15.71
chr15	63171329	63173296	5.84	6.35	5.04	1.32	0.00985	1	53.7	110	30.89	34.91
chr18	81471595	81474284	5.16	4.32	5.69	-1.37	0.00986	1	21.93	18	42.77	60.22
chr9	116297747	116299041	4.6	5.22	3.5	1.72	0.00987	1	50.68	24	9.5	13.09
chr15	5076065	5078605	5.78	6.28	5	1.28	0.00987	1	62.78	93	39.6	24.44
chrX	63288745	63290186	3.7	4.44	2.07	2.37	0.0099	1	20.42	23	3.17	5.24
chr17	53006514	53008908	5.06	5.59	4.23	1.36	0.0099	1	49.16	47	17.42	20.07
chr8	32441590	32443027	4.83	5.38	3.9	1.48	0.0099	1	38.57	45	15.05	14.84
chr5	115937861	115944863	7.65	8.04	7.1	0.94	0.00993	0.163	210.27	317	166.32	108.21
chr9	40565793	40568014	5.38	5.89	4.57	1.32	0.00994	1	53.7	65	29.3	18.33
chr4	53239847	53241891	5.3	5.85	4.4	1.45	0.00995	1	52.19	63	30.89	11.35
chr11	28805433	28806843	5.23	5.77	4.33	1.44	0.00998	1	36.31	73	23.76	16.58
chr11	86463620	86470282	7.63	8.01	7.1	0.91	0.00999	0.163	211.78	304	159.19	116.07
chr17	35724515	35731055	7.99	8.42	7.39	1.03	0.01	0.163	193.63	490	182.16	153.59
chr7	87918402	87920546	5.93	6.41	5.21	1.2	0.01	1	93.03	77	29.3	44.51
chr4	20566139	20568033	5.21	5.83	4.11	1.71	0.01	1	20.42	93	20.59	13.96
chr12	99520569	99522638	5.69	6.25	4.76	1.49	0.01	1	59.75	92	41.98	12.22
chr7	89881109	89883196	5.38	5.91	4.53	1.39	0.0101	1	42.36	78	27.72	18.33
chr13	113108482	113109067	5.51	6.1	4.52	1.58	0.0101	1	27.99	109	22.18	23.56
chr4	29988013	29989017	4.2	4.96	2.5	2.45	0.0101	1	9.08	53	8.71	2.62
chr8	109112446	109115107	6.87	7.35	6.14	1.21	0.0101	0.165	95.3	231	58.61	82.03
chr3	132719183	132721335	4.77	3.78	5.36	-1.58	0.0101	1	17.4	10	35.64	46.25
chr9	23023118	23024610	5.73	6.26	4.86	1.41	0.0101	1	50.68	103	38.81	19.2
chr6	145660890	145663992	6.55	7.03	5.83	1.2	0.0102	0.165	83.2	179	56.23	57.6
chr17	17981976	17984260	6.16	6.67	5.35	1.33	0.0102	1	61.26	143	32.47	48.87
chr2	169318641	169320448	5.44	6.03	4.41	1.62	0.0102	1	27.99	103	27.72	14.84
chr15	66738903	66740738	4.58	5.19	3.5	1.69	0.0102	1	27.99	45	9.5	13.09
chr18	38793397	38795042	4.02	2.59	4.73	-2.14	0.0102	1	6.05	6	19.01	34.04
chr18	62362299	62364345	6.64	7.11	5.94	1.16	0.0103	0.166	93.03	183	67.32	55.85
chr15	89040461	89042236	5.65	6.17	4.83	1.34	0.0103	1	49.16	95	22.97	34.04
chr19	24235788	24243293	7.87	8.2	7.43	0.78	0.0103	0.166	300.27	289	185.33	158.83
chr10	92557209	92558309	5.32	5.9	4.33	1.58	0.0103	1	28.74	91	25.34	14.84
chr3	119658435	119660700	5.49	6	4.7	1.3	0.0103	1	50.68	77	29.3	22.69
chr15	64331683	64334250	6.23	6.7	5.52	1.18	0.0103	0.166	97.57	111	58.61	33.16
chr8	35087819	35089810	6.13	6.69	5.2	1.49	0.0104	1	42.36	164	34.06	39.27
chr2	4997145	4998616	5.21	5.81	4.16	1.65	0.0104	1	27.23	85	25.34	10.47
chr19	8115717	8118955	5.18	5.73	4.29	1.44	0.0104	1	43.87	62	26.93	12.22
chr13	32975969	32977501	5.33	5.88	4.44	1.45	0.0104	1	34.04	84	20.59	22.69
chr1	133022040	133024162	6.07	6.56	5.31	1.25	0.0104	1	68.07	121	32.47	47.13
chrX	127438542	127440200	4.76	5.38	3.66	1.71	0.0104	1	24.2	59	16.63	8.73
chr9	3866595	3868244	5.39	5.95	4.47	1.48	0.0104	1	32.52	91	19.8	24.44
chr10	99369097	99370434	4.72	5.33	3.67	1.66	0.0105	1	27.23	53	15.84	9.6
chr7	5349372	5351171	5.03	5.58	4.14	1.44	0.0105	1	42.36	53	22.97	12.22
chr3	45322361	45323927	5.18	5.74	4.25	1.49	0.0105	1	34.04	73	12.67	25.31
chr11	120368061	120370863	6.75	7.17	6.15	1.02	0.0105	0.168	124.04	164	66.53	75.05
chr3	115536742	115541969	6.77	7.18	6.19	0.99	0.0105	0.168	142.95	147	72.86	73.31
chr8	25776510	25779120	6.26	6.78	5.45	1.33	0.0106	0.169	68.83	151	57.02	30.54
chr12	9985289	9987783	6.02	6.54	5.22	1.32	0.0106	1	62.78	123	47.52	27.05
chr14	90155163	90156118	5.14	5.97	2.96	3.01	0.0106	1	20.42	105	10.3	5.24
chr2	28609913	28611887	4.89	5.44	3.96	1.48	0.0107	1	40.09	47	19.8	11.35
chr13	96612975	96614426	4.89	5.48	3.86	1.62	0.0107	1	24.2	65	15.05	13.96
chr11	4233718	4238040	6.97	7.38	6.39	0.98	0.0107	0.17	182.28	150	95.83	72.43
chr19	29549359	29553743	6.85	7.3	6.18	1.12	0.0107	0.17	118.75	196	90.29	54.98
chr14	14105275	14107480	2.59	-0.19	3.48	-3.66	0.0107	1	0.76	1	12.67	9.6
chr17	23210884	23212699	2.59	-0.19	3.48	-3.66	0.0107	1	0.76	1	12.67	9.6
chr15	85175478	85180649	7.06	7.47	6.49	0.98	0.0107	0.17	149	205	79.2	100.36
chr2	38137130	38139877	5.92	6.4	5.2	1.2	0.0108	1	73.37	95	42.77	30.54
chr14	102196464	102199738	6.46	6.9	5.81	1.09	0.0108	0.17	98.33	141	54.65	57.6
chr2	78419956	78421126	4.83	5.39	3.9	1.5	0.0108	1	34.04	50	15.84	13.96
chr11	86403481	86409435	7.5	7.86	7.02	0.84	0.0108	0.17	217.83	246	129.89	129.16
chr2	54418910	54420715	5.67	6.26	4.67	1.59	0.0108	1	46.14	107	40.39	10.47
chr10	56206036	56206944	4.67	5.32	3.46	1.86	0.0108	1	18.91	61	15.05	6.98
chr17	43126256	43127413	5.39	5.95	4.45	1.5	0.0108	1	31.01	93	24.55	19.2
chr8	35585820	35588290	6.91	7.35	6.28	1.07	0.0109	0.171	117.99	209	86.33	68.94
chr8	77919277	77922562	5.98	6.51	5.13	1.38	0.0109	1	49.16	133	30.89	39.27
chr7	99406996	99408481	4.89	5.49	3.81	1.68	0.0109	1	21.18	69	15.05	13.09
chr6	39396880	39398698	5.52	6.05	4.69	1.35	0.0109	1	43.11	89	22.97	28.8
chr18	71043456	71045667	4.93	4.03	5.48	-1.45	0.0109	1	19.67	13	39.6	49.74
chr2	58398416	58399838	5.32	5.86	4.45	1.41	0.0109	1	36.31	80	23.76	20.07
chr11	120946329	120948628	6.62	7.06	5.98	1.08	0.011	0.172	109.67	157	53.86	72.43
chr18	5704340	5706753	4.9	3.97	5.46	-1.49	0.011	1	17.4	14	32.47	55.85
chr18	41491610	41494879	4.71	3.67	5.31	-1.65	0.011	1	14.37	11	26.14	53.23
chr17	83735159	83738229	6.22	6.68	5.54	1.14	0.0111	0.173	82.44	123	45.14	48
chr1	20059515	20061500	5.22	5.83	4.16	1.67	0.0111	1	20.42	93	18.22	17.45
chr5	4322563	4325056	6.41	6.93	5.6	1.34	0.0111	0.173	67.32	177	60.98	35.78
chr2	37479217	37481021	5.12	5.68	4.21	1.47	0.0112	1	33.28	69	22.97	13.96
chr5	97047694	97050255	6.41	6.87	5.71	1.17	0.0112	0.174	87.74	147	61.78	42.76
chr6	105920595	105922279	4.46	3.35	5.08	-1.74	0.0112	1	11.35	9	28.51	39.27
chrX	136041323	136043648	4.43	5.08	3.23	1.85	0.0113	1	44.63	23	12.67	6.11
chr3	26824865	26826974	4.74	3.8	5.31	-1.51	0.0113	1	12.86	15	36.43	42.76
chr1	72511025	72512127	4.76	5.39	3.63	1.76	0.0113	1	18.91	65	14.26	10.47
chr2	48867945	48870032	6.27	6.75	5.52	1.24	0.0114	0.176	80.93	135	59.4	32.29
chr5	13404157	13405615	5.04	5.57	4.18	1.4	0.0114	1	39.33	56	21.38	14.84
chr5	146534073	146536798	3.72	1.96	4.49	-2.53	0.0114	1	6.81	1	21.38	23.56
chr2	82336594	82338101	4.62	5.24	3.54	1.7	0.0114	1	23.45	52	11.88	11.35
chr8	35287163	35289352	5.83	6.39	4.9	1.5	0.0114	1	43.11	125	41.18	18.33
chr19	7672359	7674179	5.49	5.97	4.75	1.22	0.0115	1	60.51	65	26.93	27.05
chr1	90369961	90373032	6.8	7.26	6.13	1.13	0.0115	0.177	101.35	205	62.57	77.67
chr11	51816197	51817670	4.98	5.52	4.12	1.4	0.0115	1	37.82	54	19.01	15.71
chr19	23441484	23443472	4.87	5.42	3.98	1.44	0.0115	1	50.68	35	15.84	15.71
chr3	27052000	27056320	7.33	7.71	6.82	0.89	0.0115	0.177	183.04	235	110.09	116.07
chr5	32510977	32512919	6.24	6.75	5.45	1.3	0.0115	0.177	63.53	151	51.48	35.78
chr15	79913519	79915694	5.6	6.08	4.86	1.23	0.0116	1	56.73	79	30.89	27.05
chr5	148072306	148076512	6.17	6.64	5.47	1.17	0.0116	1	74.88	125	44.35	44.51
chr2	8654213	8657008	6.12	6.68	5.21	1.47	0.0117	1	41.6	163	38.02	35.78
chr3	94869724	94871164	6.3	6.78	5.57	1.21	0.0117	0.179	73.37	146	51.48	43.63
chr9	102979770	102982585	6.22	6.7	5.49	1.21	0.0117	0.179	69.58	139	42.77	47.13
chr2	19246049	19250530	6.83	7.33	6.08	1.25	0.0118	0.179	92.28	229	87.12	48
chr18	14663745	14665865	4.57	3.5	5.18	-1.68	0.0118	1	10.59	12	25.34	47.13
chr12	71895711	71897359	5.66	6.15	4.91	1.24	0.0118	1	56.73	85	26.14	34.04
chr8	14435268	14437222	4.47	3.38	5.08	-1.7	0.0118	1	9.83	11	38.81	28.8
chr19	21299345	21307092	7.48	7.85	7	0.85	0.0118	0.18	247.33	213	140.98	114.32
chr15	23833143	23834575	5.17	5.76	4.17	1.59	0.0118	1	27.23	81	24.55	11.35
chr8	39819717	39821297	5.38	5.88	4.6	1.28	0.0118	1	47.65	70	21.38	27.05
chr5	13385560	13388014	5.34	5.87	4.49	1.39	0.0118	1	36.31	81	22.18	22.69
chr5	19475597	19477248	5.34	5.94	4.31	1.63	0.0119	1	35.55	87	31.68	7.85
chr2	60713571	60716927	6.03	6.48	5.35	1.13	0.0119	1	90.01	89	45.94	35.78
chr9	75801952	75803850	6.05	6.54	5.29	1.26	0.0119	1	59.75	127	38.81	39.27
chr15	5574545	5576359	5.11	5.64	4.28	1.36	0.0119	1	48.41	51	13.46	25.31
chr11	67709579	67712217	6.47	6.92	5.83	1.09	0.0119	0.181	139.17	103	67.32	46.25
chr7	79287394	79289151	4.68	5.28	3.61	1.67	0.012	1	24.96	53	8.71	15.71
chr8	55693142	55696544	7.08	7.55	6.39	1.16	0.012	0.181	139.17	235	117.22	50.62
chr9	58461960	58463855	5.38	5.87	4.64	1.23	0.012	1	59.75	57	26.14	23.56
chr5	95500738	95507379	2.94	3.77	0.7	3.07	0.012	1	11.35	16	2.38	0.87
chr5	91307821	91312025	6.55	7.04	5.79	1.25	0.0121	0.182	78.66	185	68.11	42.76
chr6	146841793	146843830	5.15	5.7	4.26	1.44	0.0121	1	52.19	52	9.5	28.8
chr11	63594263	63596614	5.74	6.25	4.92	1.33	0.0121	1	100.6	52	20.59	40.14
chr2	109595393	109597048	4.55	5.15	3.49	1.66	0.0121	1	27.99	43	10.3	12.22
chr8	63956643	63958584	5.66	6.19	4.83	1.35	0.0121	1	44.63	101	22.97	34.04
chr18	26180803	26184599	5.43	4.66	5.94	-1.28	0.0121	1	20.42	30	48.31	74.18
chr2	117462677	117465134	6.62	7.11	5.88	1.23	0.0121	0.182	77.15	199	59.4	58.47
chr1	143360140	143362236	5.93	6.45	5.1	1.35	0.0122	1	57.48	117	45.94	22.69
chr13	91864035	91864956	4.3	4.97	2.98	2	0.0122	1	15.88	47	7.92	7.85
chr13	74907593	74911428	6.61	7.07	5.93	1.14	0.0122	0.183	94.54	174	71.28	50.62
chr7	87442878	87444975	5.67	6.18	4.87	1.31	0.0123	1	49.92	95	35.64	22.69
chr5	150409250	150410325	4.92	5.49	3.96	1.53	0.0123	1	31.01	59	20.59	10.47
chrX	63916110	63917362	4.79	5.43	3.61	1.82	0.0123	1	17.4	69	16.63	7.85
chr17	8105093	8108327	4.86	5.4	3.98	1.42	0.0123	1	47.65	37	15.05	16.58
chr3	63509911	63512009	4.98	4.15	5.51	-1.36	0.0123	1	17.4	18	49.9	41.02
chr2	37267114	37269082	4.78	5.34	3.85	1.49	0.0123	1	43.87	37	17.42	11.35
chr18	89014803	89016114	5.02	5.56	4.14	1.42	0.0123	1	35.55	59	13.46	21.82
chr5	32337257	32339024	6.09	6.56	5.38	1.18	0.0123	1	73.37	115	47.52	35.78
chr2	87270716	87272553	4.97	5.53	4.05	1.48	0.0123	1	29.5	63	18.22	14.84
chr2	114908099	114909510	4.85	5.41	3.92	1.49	0.0124	1	34.04	51	11.09	19.2
chr5	91844840	91846576	3.96	4.66	2.56	2.09	0.0124	1	23.45	27	3.96	7.85
chr9	11379638	11381371	5.47	6.02	4.57	1.45	0.0124	1	32.52	97	22.97	24.44
chr18	53891754	53893043	4.17	2.79	4.86	-2.07	0.0124	1	9.83	4	19.8	38.4
chr3	126550235	126551789	5.15	5.67	4.31	1.36	0.0125	1	37.06	65	20.59	19.2
chr19	5641152	5650933	7.82	8.17	7.36	0.81	0.0125	0.186	307.84	268	192.45	137.01
chr19	55621418	55623740	5.27	5.81	4.4	1.41	0.0125	1	76.39	36	14.26	27.93
chr9	25049637	25054695	7.21	7.69	6.5	1.18	0.0125	0.186	105.89	306	103.75	77.67
chr3	121491495	121496242	6.61	7.02	6.01	1.01	0.0125	0.186	144.46	116	60.98	68.07
chr13	6228942	6231140	6.05	6.6	5.15	1.44	0.0125	1	41.6	152	37.22	34.04
chr4	82156039	82157835	5.5	6.01	4.71	1.29	0.0125	1	54.46	74	34.06	18.33
chr19	18838859	18843052	7.08	7.46	6.55	0.91	0.0125	0.186	182.28	171	102.17	85.52
chr1	131149657	131150861	4.78	5.44	3.56	1.88	0.0126	1	13.61	73	8.71	14.84
chr7	77574020	77574674	4.6	5.25	3.37	1.89	0.0126	1	15.13	61	11.88	8.73
chr19	29254643	29263277	7.58	7.99	7.01	0.98	0.0126	0.187	316.91	190	163.94	93.38
chr2	86997264	86997989	4.3	5.03	2.77	2.26	0.0127	1	14.37	51	11.88	1.75
chr3	13496178	13497808	4.54	5.16	3.4	1.77	0.0127	1	22.69	49	7.13	13.96
chr15	63983546	63988569	7.02	7.41	6.47	0.94	0.0127	0.187	161.1	180	101.38	75.92
chr3	57054633	57057653	6.6	7.02	6	1.02	0.0127	0.187	127.82	131	72.07	55.85
chrX	20446307	20447952	4.75	5.31	3.81	1.49	0.0127	1	46.14	33	15.05	13.09
chr2	20366600	20368890	5.71	6.22	4.9	1.32	0.0127	1	45.38	104	29.3	30.54
chr9	75848868	75852333	6.63	7.08	5.98	1.1	0.0127	0.187	99.84	171	72.86	53.23
chr1	51005441	51007234	4.33	5.04	2.89	2.15	0.0127	1	10.59	55	8.71	6.11
chr6	119408749	119410773	5.07	4.19	5.61	-1.42	0.0127	1	13.61	23	34.06	63.71
chrX	98321760	98322843	4.98	5.52	4.11	1.42	0.0127	1	37.06	55	12.67	21.82
chrX	20600116	20602304	4.33	4.98	3.11	1.87	0.0128	1	43.11	20	10.3	6.98
chr5	99372095	99374712	6.24	6.72	5.53	1.19	0.0129	0.187	76.39	134	55.44	36.65
chr5	93532965	93536260	6.33	6.82	5.57	1.25	0.0129	0.187	77.15	149	62.57	32.29
chr1	166312011	166313845	4.68	3.53	5.31	-1.77	0.0129	1	18.15	5	27.72	51.49
chr1	180254569	180256786	5.46	5.94	4.73	1.21	0.0129	1	55.97	67	26.93	26.18
chr12	118965134	118966802	5.6	6.13	4.76	1.37	0.0129	1	43.11	97	34.06	20.07
chr3	82142993	82144931	4.83	3.91	5.38	-1.47	0.0129	1	18.15	12	37.22	46.25
chr4	131909134	131911177	5.74	6.25	4.94	1.31	0.0129	1	46.89	105	30.89	30.54
chr9	37593845	37595159	4.68	5.32	3.48	1.85	0.0129	1	15.13	65	12.67	9.6
chr19	4475904	4485330	8.02	8.37	7.57	0.8	0.0129	0.187	342.63	318	233.64	146.61
chr19	3846755	3855768	8.1	8.42	7.7	0.72	0.0129	0.187	329.77	355	232.05	182.39
chr2	79436262	79438090	4.98	5.54	4.07	1.47	0.0129	1	34.04	59	22.18	11.35
chr7	79241087	79244070	6.35	6.79	5.71	1.08	0.0129	0.187	91.52	130	52.27	52.36
chr14	47253608	47256841	6.81	7.27	6.13	1.14	0.013	0.187	115.72	192	92.66	47.13
chr9	35274213	35275586	5.16	5.66	4.38	1.28	0.013	1	46.14	55	19.8	21.82
chr3	150747156	150749506	6.11	6.66	5.22	1.44	0.013	1	50.68	151	22.97	51.49
chr9	15119457	15124851	6.56	6.98	5.97	1.01	0.013	0.187	118.75	133	62.57	62.83
chr7	71420677	71424086	6.97	7.44	6.26	1.18	0.013	0.187	104.38	243	97.42	55.85
chr14	18750966	18752321	4.94	5.49	4.03	1.47	0.013	1	49.16	41	22.97	9.6
chr15	69211570	69214127	5.14	5.68	4.28	1.4	0.013	1	39.33	63	12.67	26.18
chr19	30179809	30184159	6.93	7.34	6.36	0.97	0.0131	0.187	173.21	150	97.42	67.2
chr5	144398202	144402655	6.35	6.79	5.69	1.1	0.0131	0.187	118.75	103	63.36	40.14
chr5	29538381	29539792	4.89	5.43	4.02	1.41	0.0131	1	52.19	34	16.63	15.71
chr15	69247428	69249628	4.67	5.24	3.73	1.51	0.0131	1	38.57	37	14.26	12.22
chr8	114269214	114273103	7.49	7.91	6.89	1.02	0.0131	0.187	148.25	332	128.3	108.21
chr2	11315418	11317521	5.22	5.71	4.46	1.25	0.0131	1	53.7	51	22.97	20.94
chr2	50818273	50820554	6.19	6.71	5.35	1.36	0.0131	0.187	50.68	159	37.22	44.51
chr19	16363285	16365236	4.92	5.46	4.05	1.41	0.0132	1	55.21	33	17.42	15.71
chr19	24369318	24371401	5.15	5.65	4.37	1.29	0.0132	1	47.65	53	22.97	18.33
chr4	149725730	149728288	5.32	5.82	4.56	1.25	0.0132	1	47.65	65	24.55	22.69
chr9	99345724	99348081	5.6	6.08	4.85	1.23	0.0132	1	53.7	82	32.47	25.31
chr2	80527755	80530845	6.09	6.59	5.3	1.29	0.0132	1	58.24	135	30.89	48
chr19	19191781	19193404	5.03	5.57	4.18	1.39	0.0132	1	59.75	35	21.38	14.84
chr3	123951875	123954566	4.51	3.35	5.15	-1.8	0.0132	1	14.37	6	24.55	46.25
chr10	65301220	65303649	6.37	6.89	5.55	1.34	0.0132	0.187	58.24	179	54.65	39.27
chr9	69278345	69284048	7.1	7.48	6.58	0.91	0.0132	0.187	164.89	193	87.91	102.98
chr2	113479307	113482136	6.4	6.85	5.73	1.12	0.0133	0.187	147.49	83	53.06	53.23
chr10	111017515	111022210	7.01	7.43	6.43	1	0.0133	0.187	127.82	217	82.37	89.89
chr5	93182001	93184047	5.26	5.76	4.5	1.27	0.0133	1	63.53	45	19.8	25.31
chr10	25707468	25709344	4.44	3.31	5.07	-1.76	0.0133	1	6.81	13	43.56	23.56
chr9	96133481	96134756	4.74	5.34	3.69	1.65	0.0133	1	21.93	59	11.88	13.96
chr9	53095789	53099303	6.14	6.69	5.25	1.44	0.0133	1	47.65	159	49.9	26.18
chr11	70002248	70003687	6.02	6.51	5.27	1.24	0.0133	1	59	123	41.18	35.78
chr12	89483666	89484964	4.69	5.37	3.37	2.01	0.0133	1	9.83	73	11.88	8.73
chr17	93778214	93781443	6.89	7.39	6.13	1.26	0.0134	0.189	80.93	255	82.37	57.6
chr6	63296380	63298379	5.62	6.2	4.63	1.58	0.0134	1	26.47	121	19.8	29.67
chr11	112819150	112822101	5.28	4.52	5.77	-1.25	0.0134	1	21.93	24	60.98	48
chr8	35592494	35593690	5.28	5.82	4.42	1.4	0.0134	1	34.04	79	24.55	18.33
chr2	13477513	13481436	7.51	7.93	6.94	0.99	0.0135	0.189	181.53	305	156.82	88.14
chrX	73022608	73025712	5.7	6.21	4.92	1.28	0.0135	1	94.54	53	38.81	21.82
chr15	17009831	17011443	3.72	4.44	2.2	2.24	0.0135	1	26.47	17	3.96	5.24
chrX	98963039	98965958	4.6	5.23	3.46	1.77	0.0135	1	55.21	20	15.05	6.98
chr18	22050364	22052483	6.41	6.88	5.71	1.17	0.0135	0.189	76.39	159	53.06	51.49
chr17	54278686	54280980	5.74	6.32	4.77	1.55	0.0135	1	28.74	131	30.89	23.56
chr9	41287712	41290669	6.89	7.35	6.21	1.14	0.0135	0.189	105.13	221	91.87	55.85
chr9	70066511	70068589	4.9	5.46	3.97	1.48	0.0135	1	40.84	47	8.71	22.69
chr2	18912757	18915050	5.45	5.94	4.69	1.25	0.0135	1	47.65	75	24.55	27.05
chr4	136005529	136008161	6.23	6.72	5.46	1.26	0.0136	0.189	64.29	147	53.06	34.91
chr10	34513674	34514941	5.07	5.67	4.02	1.65	0.0136	1	18.91	83	15.05	17.45
chr17	61633874	61635352	4.71	5.29	3.75	1.54	0.0136	1	31.01	47	10.3	16.58
chr2	29384053	29386514	5.03	5.54	4.21	1.33	0.0136	1	49.16	44	21.38	15.71
chr13	29594104	29598523	7.1	7.54	6.48	1.06	0.0136	0.19	120.26	251	96.62	82.03
chr1	143189450	143191202	5.12	5.67	4.24	1.43	0.0137	1	32.52	69	22.97	14.84
chr13	48888026	48889942	4.46	3.18	5.13	-1.95	0.0137	1	15.13	3	25.34	44.51
chr18	54747926	54749841	4.34	3.18	4.98	-1.81	0.0137	1	9.08	9	22.18	41.02
chr17	65032770	65034768	5.64	6.11	4.94	1.17	0.0137	1	61.26	77	31.68	29.67
chr16	21861653	21863427	4.87	5.42	3.97	1.45	0.0137	1	32.52	53	17.42	13.96
chr2	79461788	79463361	5.04	5.62	4.04	1.59	0.0138	1	23.45	75	20.59	12.22
chr5	69588951	69591075	4.68	5.3	3.6	1.7	0.0138	1	19.67	59	11.09	13.09
chr8	82201593	82204233	5.93	6.4	5.23	1.17	0.0138	1	71.85	97	45.14	29.67
chr18	82055255	82057176	4.5	3.37	5.13	-1.76	0.0138	1	13.61	7	23.76	46.25
chr11	42420941	42426235	6.56	6.99	5.92	1.07	0.0138	0.192	142.95	112	75.24	46.25
chr2	118122541	118124103	5	5.52	4.19	1.33	0.0139	1	40.84	51	18.22	18.33
chr4	135231725	135233638	5.51	6.01	4.76	1.25	0.0139	1	53.7	75	33.26	20.94
chr5	5292388	5294063	5.3	5.82	4.5	1.32	0.0139	1	41.6	71	26.93	18.33
chr8	109677806	109679462	4.62	5.2	3.62	1.58	0.014	1	35.55	38	15.84	8.73
chr13	91345697	91346901	4.79	5.34	3.87	1.47	0.014	1	34.04	47	11.88	17.45
chr1	142202653	142203787	4.25	4.97	2.78	2.19	0.014	1	13.61	49	2.38	11.35
chr1	183914739	183916405	4.98	5.53	4.07	1.46	0.014	1	29.5	63	13.46	20.07
chr3	38393941	38396615	5.8	6.25	5.12	1.13	0.014	1	76.39	76	34.85	34.91
chrX	17852875	17854511	3.89	4.68	2	2.68	0.014	1	45.38	6	7.13	0.87
chr11	87274753	87278827	6.64	7.06	6.06	1	0.014	0.194	149	117	72.07	61.09
chr5	66436671	66438586	6.15	6.68	5.28	1.4	0.014	1	44.63	161	41.98	35.78
chr15	85800717	85802509	5.07	5.6	4.22	1.38	0.0141	1	33.28	64	19.01	18.33
chr7	69227357	69229086	5.13	5.7	4.19	1.51	0.0141	1	24.96	79	19.01	17.45
chr5	44889882	44891786	4.64	3.69	5.21	-1.52	0.0141	1	12.86	13	34.85	39.27
chr16	62577980	62580164	3.23	4.03	1.27	2.75	0.0141	1	13.61	19	3.96	0.87
chr2	19568161	19569422	5.39	5.91	4.56	1.35	0.0141	1	37.06	83	24.55	22.69
chr1	164902155	164903517	2.96	3.8	0.7	3.1	0.0141	1	21.93	6	2.38	0.87
chr2	34923213	34925461	5.73	6.19	5.06	1.14	0.0141	1	70.34	76	32.47	34.04
chr12	56540341	56541715	4.18	2.94	4.83	-1.9	0.0141	1	8.32	7	22.97	34.04
chr19	16398909	16406410	7.42	7.78	6.96	0.82	0.0142	0.195	222.37	216	128.3	120.43
chr7	72490453	72492050	4.21	4.87	2.95	1.92	0.0142	1	32.52	26	11.09	4.36
chr11	68259234	68260818	5.36	5.9	4.51	1.39	0.0142	1	34.04	85	25.34	20.07
chr3	145773281	145774330	4.93	5.52	3.92	1.6	0.0142	1	22.69	69	11.09	19.2
chr14	22097531	22099063	5.22	5.78	4.31	1.47	0.0142	1	41.6	68	30.1	9.6
chr17	6171396	6173589	6.81	7.25	6.17	1.07	0.0142	0.195	106.65	197	82.37	61.96
chr2	11297953	11301224	6.14	6.61	5.42	1.19	0.0142	1	66.56	129	39.6	46.25
chr2	83897611	83901068	6.61	7.08	5.92	1.16	0.0142	0.195	81.69	189	57.02	63.71
chr5	116458654	116460833	6.22	6.7	5.49	1.2	0.0142	0.195	67.32	140	49.9	40.14
chrX	136308850	136311065	5.63	6.19	4.72	1.47	0.0142	1	32.52	113	30.89	21.82
chr17	90856632	90858954	5.6	6.08	4.86	1.21	0.0142	1	52.19	83	27.72	30.54
chr19	9673772	9678438	2.43	3.31	-0.26	3.57	0.0143	1	9.83	10	0.79	0.87
chr7	62794818	62797702	5.95	6.44	5.18	1.26	0.0143	1	55.21	119	41.98	30.54
chr8	130762378	130765553	6.81	7.26	6.13	1.13	0.0143	0.195	94.54	213	78.41	61.96
chr4	137911625	137913619	5.49	6.02	4.66	1.36	0.0143	1	44.63	85	34.06	16.58
chr1	159271830	159275779	6.69	7.11	6.1	1.01	0.0143	0.196	112.7	163	66.53	70.69
chr19	19305840	19308730	6.1	6.54	5.45	1.09	0.0144	1	93.03	93	49.1	38.4
chr3	57212647	57218827	7.63	8.03	7.06	0.97	0.0144	0.196	164.13	359	140.18	126.54
chr1	68547920	68549340	4.08	4.81	2.52	2.29	0.0144	1	9.08	47	7.13	4.36
chrX	159532059	159535048	5.57	6.07	4.78	1.29	0.0144	1	88.49	46	34.06	20.94
chr10	97832813	97834399	4.43	5.09	3.19	1.9	0.0144	1	15.13	53	8.71	9.6
chr16	3722899	3723825	5.07	5.62	4.16	1.46	0.0145	1	35.55	63	25.34	10.47
chr2	5187396	5190363	5.58	6.11	4.72	1.4	0.0145	1	35.55	103	22.97	29.67
chr19	58624756	58625761	4.45	5.06	3.37	1.69	0.0145	1	41.6	25	11.88	8.73
chr8	130137666	130139550	4.41	5.02	3.33	1.69	0.0145	1	31.77	33	7.92	12.22
chr1	161817688	161821487	6.77	7.21	6.13	1.08	0.0145	0.198	112.7	183	51.48	88.14
chr11	41533552	41536162	5.09	5.59	4.29	1.3	0.0146	1	41.6	55	17.42	21.82
chr2	13220106	13221684	5.41	5.94	4.55	1.38	0.0146	1	63.53	59	35.64	11.35
chr11	51409366	51410875	4.32	3.17	4.94	-1.77	0.0146	1	6.05	12	29.3	32.29
chr17	21701513	21705619	6.54	6.96	5.95	1.01	0.0146	0.198	114.21	134	55.44	68.07
chr6	91396804	91399254	5.24	4.49	5.73	-1.24	0.0146	1	18.91	26	56.23	49.74
chr13	23591729	23593835	5.52	5.99	4.81	1.18	0.0146	1	62.02	65	30.89	25.31
chr1	82027317	82029015	4.62	5.25	3.47	1.78	0.0146	1	21.18	55	5.54	16.58
chr6	55568340	55571462	6.45	6.95	5.69	1.25	0.0146	0.198	65.8	181	45.94	57.6
chr15	99230709	99232161	5.42	5.94	4.62	1.32	0.0147	1	38.57	84	23.76	25.31
chr8	109777524	109780955	7.11	7.5	6.58	0.92	0.0147	0.198	149	212	97.42	93.38
chr2	16904199	16905474	5.3	5.9	4.27	1.63	0.0148	1	20.42	99	23.76	14.84
chr2	100923332	100925501	5.8	6.27	5.11	1.16	0.0148	1	82.44	72	41.98	27.05
chr10	45454349	45455548	4.89	5.51	3.78	1.73	0.0148	1	24.96	66	22.18	5.24
chr6	147664945	147666459	2.83	0.46	3.68	-3.22	0.0148	1	0.76	2	5.54	20.07
chr8	32517584	32519879	5.3	5.8	4.53	1.27	0.0148	1	46.14	65	27.72	18.33
chr2	29983789	29985353	4.82	5.37	3.91	1.46	0.0148	1	53.7	29	13.46	16.58
chr10	110010391	110012500	5.32	5.8	4.59	1.2	0.0149	1	58.24	53	22.97	25.31
chr15	34954732	34956673	5.36	5.86	4.57	1.29	0.0149	1	73.37	43	29.3	18.33
chr2	138030780	138033238	4.96	4.1	5.49	-1.39	0.015	1	17.4	17	57.82	32.29
chr17	93583947	93585809	5.14	5.63	4.37	1.26	0.015	1	46.14	53	21.38	20.07
chr13	5839270	5841082	4.87	5.43	3.93	1.5	0.015	1	27.23	59	17.42	13.09
chr9	65047292	65050260	6.53	6.97	5.88	1.1	0.015	0.202	88.49	163	62.57	54.98
chr9	95713374	95717088	6.25	6.74	5.53	1.21	0.015	0.202	68.07	145	53.86	38.4
chr2	61133108	61135023	5.68	6.15	5	1.15	0.015	1	62.78	79	31.68	32.29
chr6	143592377	143594788	5.07	4.29	5.58	-1.29	0.0151	1	18.15	21	54.65	41.02
chr12	6848609	6850011	4.64	5.22	3.64	1.58	0.0151	1	25.72	49	11.88	13.09
chr14	95316822	95318930	4.78	5.38	3.71	1.67	0.0151	1	20.42	63	16.63	9.6
chrX	72654162	72655765	4.64	5.26	3.55	1.71	0.0152	1	41.6	35	19.01	4.36
chr3	29777848	29781698	6.41	6.86	5.74	1.12	0.0152	0.203	81.69	151	47.52	59.34
chr11	99415016	99417114	5.73	6.25	4.9	1.35	0.0152	1	40.09	112	32.47	27.05
chr6	117027512	117029334	4.55	3.55	5.14	-1.59	0.0152	1	11.35	12	27.72	42.76
chr5	93172793	93176926	6.55	6.97	5.94	1.03	0.0152	0.204	105.89	145	68.9	54.11
chrX	162680689	162683019	4.71	5.33	3.6	1.72	0.0152	1	58.24	22	18.22	6.11
chr5	104835905	104838484	6.56	7.03	5.87	1.16	0.0153	0.204	84.71	176	70.49	46.25
chr3	50999000	51000594	5.74	6.2	5.06	1.13	0.0153	1	77.9	69	37.22	29.67
chr4	66488725	66490416	5.54	6.04	4.77	1.27	0.0153	1	44.63	87	30.89	23.56
chr10	94175087	94176689	4.7	5.31	3.62	1.69	0.0153	1	20.42	59	15.84	8.73
chr7	147306261	147309790	6.65	7.09	6.03	1.05	0.0154	0.205	174.72	97	67.32	63.71
chr9	79904981	79906268	4.62	5.22	3.58	1.64	0.0154	1	23.45	51	14.26	9.6
chr3	105494345	105496063	4.54	3.46	5.15	-1.69	0.0154	1	9.08	13	21.38	49.74
chr17	5969799	5971417	5.4	5.91	4.6	1.32	0.0155	1	41.6	79	30.1	18.33
chr12	74263211	74265879	4.73	3.8	5.29	-1.49	0.0155	1	15.88	12	46.73	31.42
chr3	29666597	29668270	5.25	5.78	4.38	1.4	0.0155	1	31.01	79	18.22	23.56
chr5	13414893	13420120	6.88	7.33	6.22	1.11	0.0155	0.206	104.38	218	91.08	58.47
chr2	51231562	51233217	4.84	5.42	3.85	1.57	0.0156	1	22.69	63	15.84	13.09
chr2	48296150	48298539	5.81	6.32	4.99	1.33	0.0156	1	43.11	117	35.64	27.93
chr4	123264696	123266943	5.7	6.17	4.99	1.19	0.0156	1	55.21	89	29.3	34.04
chr2	115223992	115227423	6.29	6.8	5.49	1.31	0.0156	0.207	62.02	161	59.4	30.54
chr4	91630156	91632283	4.06	2.79	4.72	-1.93	0.0157	1	6.81	7	22.18	30.54
chr15	64102731	64104898	5.8	6.26	5.11	1.15	0.0157	1	70.34	83	41.18	27.93
chr8	109084761	109086676	6.06	6.56	5.29	1.28	0.0157	1	55.97	133	47.52	30.54
chr17	81163366	81166716	6.5	6.93	5.88	1.04	0.0158	0.208	98.33	145	64.94	53.23
chr12	36340871	36342373	5.65	6.15	4.87	1.28	0.0158	1	45.38	97	34.06	24.44
chr10	7229210	7235781	2.46	-0.19	3.34	-3.53	0.0158	1	0.76	1	7.13	13.09
chr3	104099087	104103547	7.31	7.68	6.8	0.88	0.0158	0.208	174.72	236	125.93	96.87
chr3	156893385	156894855	4.36	3.25	4.98	-1.72	0.0158	1	9.08	10	24.55	38.4
chr19	23165724	23168151	5.59	6.05	4.91	1.14	0.0159	1	65.8	67	26.93	33.16
chr6	128785479	128796555	8.18	8.54	7.7	0.84	0.0159	0.209	273.04	473	159.19	256.57
chr2	117469296	117471755	5.88	6.37	5.13	1.24	0.0159	1	54.46	111	41.18	28.8
chr8	79435673	79437861	6.18	6.72	5.31	1.41	0.016	0.21	41.6	169	36.43	42.76
chr4	109132668	109133852	5.22	5.79	4.25	1.54	0.016	1	21.93	89	19.8	18.33
chrX	165543111	165546441	5.49	5.99	4.73	1.26	0.0161	1	71.85	55	35.64	17.45
chr3	8928969	8931467	5.33	5.81	4.6	1.21	0.0161	1	55.21	57	19.8	28.8
chr18	40030991	40032480	4.22	2.96	4.89	-1.93	0.0161	1	4.54	11	18.22	41.02
chr5	137536935	137538071	4.77	5.31	3.9	1.4	0.0161	1	40.09	39	15.05	14.84
chr18	84977166	84979830	5.14	4.34	5.65	-1.32	0.0161	1	14.37	26	38.81	61.96
chr13	91080495	91082056	5.57	6.04	4.88	1.16	0.0161	1	56.73	75	30.89	27.93
chr19	33587681	33589258	4.35	4.97	3.26	1.71	0.0162	1	38.57	24	9.5	9.6
chr2	173277039	173278410	5.6	6.13	4.76	1.37	0.0162	1	77.9	62	41.98	12.22
chr12	85327743	85329524	5.44	5.93	4.68	1.24	0.0162	1	43.87	78	26.14	25.31
chr4	82493605	82495828	5.95	6.43	5.22	1.22	0.0162	1	55.97	117	39.6	34.91
chr2	30054420	30056636	5.36	5.84	4.63	1.21	0.0162	1	50.68	64	28.51	20.94
chr2	38118998	38120116	4.56	5.15	3.55	1.6	0.0162	1	46.14	25	9.5	13.96
chr18	61005210	61006986	4.55	3.48	5.15	-1.67	0.0162	1	11.35	11	21.38	49.74
chr3	131732108	131732836	4.49	5.12	3.35	1.76	0.0162	1	20.42	49	13.46	6.98
chr6	97159144	97162793	7.01	7.46	6.33	1.13	0.0163	0.213	96.06	257	72.86	88.14
chr12	42252417	42254202	4.3	3.12	4.94	-1.82	0.0163	1	11.35	6	23.76	37.53
chr19	23327210	23332862	6.67	7.08	6.08	1	0.0164	0.213	161.86	109	73.66	61.96
chr8	42638110	42639408	5.14	5.72	4.15	1.57	0.0164	1	20.42	85	19.8	15.71
chr17	84473196	84475826	6.25	6.71	5.57	1.15	0.0164	0.213	71.1	139	44.35	50.62
chr8	38850843	38852305	4.97	5.55	3.96	1.6	0.0164	1	21.93	72	20.59	10.47
chr2	32721888	32724521	6.45	6.92	5.74	1.18	0.0164	0.213	86.98	155	71.28	35.78
chr2	109081292	109082750	5.35	5.88	4.51	1.37	0.0165	1	32.52	85	23.76	21.82
chr6	142057409	142059310	4.31	3.2	4.94	-1.74	0.0165	1	8.32	10	23.76	37.53
chr2	60976360	60978541	5.97	6.42	5.3	1.11	0.0166	1	77.9	93	46.73	32.29
chr4	26367773	26369406	5.06	5.62	4.12	1.5	0.0166	1	23.45	75	18.22	16.58
chr8	55052276	55054748	5.58	6.04	4.91	1.14	0.0166	1	71.85	60	28.51	31.42
chr1	28667420	28668967	4.34	4.96	3.25	1.71	0.0166	1	37.06	25	10.3	8.73
chr5	16785141	16787277	5.43	5.93	4.65	1.28	0.0166	1	40.84	81	21.38	28.8
chr13	31153795	31155264	5.11	5.64	4.29	1.35	0.0166	1	32.52	67	19.01	20.07
chr1	147191076	147192973	4.95	5.47	4.13	1.34	0.0167	1	35.55	53	16.63	18.33
chr18	65838401	65840307	4.11	2.84	4.78	-1.94	0.0167	1	5.29	9	18.22	36.65
chr10	107736485	107739563	5.87	6.32	5.23	1.09	0.0167	1	76.39	83	35.64	39.27
chr19	5420718	5439249	9.05	9.33	8.69	0.65	0.0168	0.218	566.51	725	502.92	322.02
chr12	51091115	51093730	5.06	4.25	5.58	-1.34	0.0168	1	21.93	16	35.64	60.22
chr2	60537900	60539966	6.3	6.77	5.61	1.16	0.0168	0.218	77.9	140	60.98	36.65
chr11	78073214	78075837	6.49	6.93	5.85	1.08	0.0168	0.218	85.47	159	58.61	56.73
chr3	37876565	37879355	5.94	6.39	5.29	1.1	0.0169	1	99.08	69	37.22	41.02
chr8	24706654	24708031	4.66	5.24	3.67	1.57	0.0169	1	26.47	49	15.84	9.6
chr14	31881356	31883586	4.24	3.07	4.87	-1.8	0.0169	1	9.83	7	25.34	33.16
chr9	98196711	98197835	4.84	5.38	3.95	1.43	0.0169	1	30.25	53	13.46	17.45
chr6	122818885	122822405	6.63	7.13	5.86	1.27	0.0169	0.218	63.53	216	59.4	56.73
chr14	102193308	102195138	5.63	6.1	4.94	1.16	0.0169	1	55.97	81	30.89	30.54
chr9	96654128	96655268	4.93	4	5.48	-1.48	0.0169	1	12.1	20	64.15	25.31
chr1	142782102	142783224	4.67	5.32	3.46	1.86	0.017	1	12.86	67	7.13	14.84
chr4	116861771	116863650	5.67	6.13	4.99	1.13	0.017	1	62.78	77	34.85	28.8
chr19	24297245	24300865	6.96	7.35	6.44	0.91	0.017	0.218	173.21	152	97.42	75.92
chr3	92259837	92261727	4.69	3.79	5.25	-1.46	0.017	1	10.59	17	34.85	41.02
chr17	22753203	22754783	4.69	5.26	3.73	1.53	0.017	1	25.72	51	13.46	13.09
chr11	52467334	52470725	6.91	7.37	6.23	1.15	0.017	0.218	104.38	227	99	50.62
chr7	103063684	103066354	4.86	4.02	5.38	-1.37	0.017	1	17.4	15	37.22	46.25
chr8	76938947	76941467	4.86	5.39	4	1.39	0.017	1	37.06	47	19.8	12.22
chr19	10567767	10573123	7.92	8.25	7.48	0.77	0.017	0.218	327.5	283	215.42	141.38
chr1	63962972	63964118	4.78	5.42	3.61	1.8	0.017	1	14.37	71	16.63	7.85
chr6	89816377	89821179	6.68	7.17	5.93	1.24	0.017	0.218	69.58	219	68.9	53.23
chr12	19760410	19762241	3.02	1.09	3.82	-2.72	0.0171	1	2.27	2	14.26	13.96
chr16	31764090	31767300	6.05	6.52	5.37	1.14	0.0171	1	68.07	115	34.85	48
chr11	88499357	88501259	5.38	4.67	5.85	-1.19	0.0171	1	28.74	22	57.02	58.47
chr11	86420403	86422302	6.1	6.55	5.43	1.12	0.0171	1	69.58	118	43.56	42.76
chr9	44398301	44400214	4.8	5.33	3.94	1.4	0.0172	1	47.65	33	16.63	13.96
chr7	96707760	96710633	6.53	7.03	5.76	1.27	0.0172	0.219	61.26	200	59.4	48.87
chr13	104766957	104769302	6.45	6.9	5.81	1.09	0.0172	0.219	83.2	155	55.44	56.73
chr9	33897319	33899707	5.98	6.48	5.21	1.27	0.0172	1	49.16	129	36.43	37.53
chr15	23771225	23773035	4.59	5.17	3.59	1.58	0.0172	1	24.96	47	11.88	12.22
chr13	95806931	95809102	5.67	6.15	4.94	1.22	0.0172	1	49.16	93	33.26	27.93
chr2	120793364	120795720	5.58	6.05	4.89	1.16	0.0172	1	61.26	71	34.85	24.44
chr19	16698621	16700370	5.26	5.73	4.54	1.19	0.0173	1	51.43	55	22.18	24.44
chrX	30980709	30982822	2.39	3.28	-0.26	3.54	0.0173	1	14.37	5	0.79	0.87
chr13	20251700	20256794	6.8	7.19	6.27	0.92	0.0173	0.22	138.41	153	80.78	73.31
chr2	140588431	140589859	5.01	5.52	4.22	1.3	0.0173	1	38.57	53	19.8	17.45
chr19	25397041	25399446	5.36	5.84	4.64	1.19	0.0173	1	67.32	47	22.97	27.05
chr3	75301417	75304890	6.66	7.08	6.08	1	0.0173	0.22	118.75	151	53.86	81.16
chr1	24618096	24623526	5.96	5.24	6.44	-1.2	0.0174	1	29.5	46	114.84	58.47
chrX	91457615	91459907	5.51	6.02	4.72	1.29	0.0174	1	73.37	56	38.02	14.84
chr5	81592602	81594949	5.42	5.91	4.67	1.24	0.0174	1	43.11	77	22.97	27.93
chr1	175884758	175887413	5.8	6.34	4.92	1.42	0.0174	1	33.28	129	30.89	29.67
chr17	93880929	93885237	6.52	6.97	5.86	1.11	0.0174	0.22	80.93	170	61.78	54.11
chr13	23777860	23779430	5.33	5.82	4.58	1.24	0.0174	1	43.11	70	26.93	20.94
chr17	22066573	22068838	5.09	5.59	4.33	1.26	0.0174	1	51.43	45	15.84	24.44
chr5	16959145	16961389	5.75	6.21	5.06	1.16	0.0175	1	57.48	91	30.89	35.78
chr7	3149388	3151565	6.11	6.61	5.33	1.29	0.0175	1	56.73	139	52.27	27.93
chr4	88683237	88686106	6.14	6.58	5.5	1.08	0.0176	1	76.39	115	47.52	42.76
chr5	91106043	91107840	6.05	6.5	5.38	1.13	0.0176	1	73.37	108	49.9	33.16
chr15	7880895	7882961	5.98	6.44	5.29	1.15	0.0176	1	65.8	108	45.94	32.29
chr11	76098216	76100569	5.79	6.24	5.13	1.11	0.0176	1	82.44	69	39.6	30.54
chr1	59967387	59969274	4.52	5.11	3.52	1.59	0.0176	1	37.06	32	15.05	7.85
chr19	5405947	5408956	6.11	6.59	5.39	1.2	0.0176	1	96.06	97	60.19	23.56
chr6	22072119	22073595	4.9	5.42	4.09	1.32	0.0176	1	38.57	47	15.84	18.33
chr3	58686379	58688763	5.63	6.1	4.94	1.16	0.0176	1	64.29	73	22.97	38.4
chr1	146152716	146154416	4.94	5.51	3.98	1.52	0.0177	1	21.93	69	15.05	16.58
chr8	46682485	46684420	5.96	6.48	5.14	1.34	0.0177	1	45.38	133	43.56	27.05
chr2	79411589	79414932	5.99	6.44	5.33	1.11	0.0177	1	74.88	99	47.52	33.16
chr18	81508962	81511478	4.86	4.03	5.39	-1.36	0.0178	1	13.61	19	35.64	48
chr2	124147579	124151452	6.11	6.6	5.38	1.22	0.0178	1	59	135	49.1	34.04
chr15	96968438	96970283	4.86	5.39	4	1.39	0.0178	1	37.06	47	11.09	20.94
chr6	17647363	17649546	5.39	4.63	5.89	-1.26	0.0179	1	17.4	32	43.56	75.05
chr14	96915999	96919136	6.03	6.51	5.32	1.18	0.0179	1	78.66	103	54.65	25.31
chr3	63358912	63360959	5.1	5.64	4.25	1.39	0.0179	1	32.52	67	12.67	25.31
chr1	96485449	96486552	4.01	4.72	2.52	2.2	0.0179	1	9.83	43	7.13	4.36
chr3	65406518	65409235	6.14	6.59	5.47	1.13	0.018	1	68.83	124	40.39	48
chr11	41168704	41169562	4.56	5.17	3.48	1.69	0.0181	1	18.91	53	11.88	10.47
chr18	58619922	58621890	4.05	2.56	4.76	-2.2	0.0181	1	9.83	2	15.05	39.27
chr5	14029941	14033568	6.91	7.3	6.38	0.91	0.0181	0.228	141.44	173	92.66	74.18
chr2	87782031	87782836	4.52	5.18	3.27	1.91	0.0181	1	11.35	61	7.92	11.35
chr17	50537432	50540578	5.58	6.08	4.83	1.25	0.0182	1	43.87	91	24.55	32.29
chr11	86921325	86924339	7.08	6.59	7.45	-0.86	0.0182	0.229	104.38	88	167.9	182.39
chr6	113741591	113744208	5.27	4.5	5.76	-1.26	0.0183	1	14.37	31	48.31	60.22
chr1	158544705	158548565	7.44	7.84	6.89	0.95	0.0183	0.229	148.25	310	112.46	124.8
chr12	42170342	42174307	6.13	6.59	5.43	1.16	0.0183	1	102.11	91	26.14	60.22
chr15	80026435	80028140	4.42	5.04	3.34	1.69	0.0183	1	41.6	24	6.34	13.96
chr16	77295933	77297444	4.2	4.88	2.86	2.02	0.0183	1	15.88	43	3.17	11.35
chr6	122707413	122711075	6.54	6.97	5.91	1.06	0.0183	0.229	91.52	159	67.32	53.23
chr19	59954546	59958939	6.6	7.02	5.99	1.03	0.0183	0.229	121.77	138	45.14	82.03
chr13	21840910	21843782	5.99	6.43	5.37	1.05	0.0183	1	83.96	88	41.98	41.02
chr2	11830415	11832700	4.87	5.4	4	1.4	0.0184	1	53.7	31	19.8	12.22
chr8	109829793	109832805	5.78	6.23	5.13	1.1	0.0184	1	65.8	84	34.06	35.78
chr13	36787207	36789245	6.24	6.75	5.44	1.31	0.0184	0.229	55.97	159	57.02	29.67
chr12	120502418	120505082	5.36	5.86	4.6	1.26	0.0184	1	43.11	73	30.1	18.33
chr8	38308336	38310428	4.96	5.48	4.14	1.34	0.0185	1	36.31	53	21.38	13.96
chr15	7525435	7528230	5.1	5.61	4.33	1.28	0.0186	1	48.41	49	26.14	13.96
chr5	87241184	87242240	4.74	5.33	3.7	1.64	0.0186	1	25.72	55	19.8	6.11
chr3	121389035	121393348	6.86	7.24	6.33	0.91	0.0186	0.231	139.93	163	72.07	89.01
chr1	46940859	46943014	5.68	6.15	4.96	1.19	0.0186	1	57.48	85	22.18	40.14
chr15	70893831	70895386	4.47	5.06	3.47	1.58	0.0186	1	35.55	31	13.46	8.73
chr14	19609879	19612208	5.13	5.65	4.29	1.36	0.0186	1	35.55	65	26.14	13.09
chr12	111895468	111897356	4.6	3.67	5.16	-1.5	0.0186	1	14.37	11	32.47	39.27
chr19	25651849	25654234	6.21	6.68	5.51	1.18	0.0187	0.231	62.78	143	48.31	42.76
chr7	59425010	59426966	5.11	5.61	4.34	1.27	0.0187	1	44.63	53	14.26	26.18
chr19	55848637	55850918	5.44	5.93	4.69	1.24	0.0187	1	71.85	50	16.63	34.91
chr7	88010714	88012391	6.4	6.83	5.77	1.06	0.0187	0.231	83.2	145	51.48	57.6
chr13	23557754	23559352	5.43	5.9	4.74	1.16	0.0187	1	54.46	65	22.97	30.54
chr1	193214874	193218804	6.24	6.69	5.57	1.12	0.0187	0.231	71.85	135	41.98	53.23
chr3	144633212	144635426	6.43	6.91	5.71	1.2	0.0187	0.231	77.15	164	34.06	70.69
chr2	71480985	71483362	6.13	6.57	5.5	1.07	0.0187	1	77.15	113	42.77	48
chr6	84817064	84819954	5.44	5.92	4.72	1.2	0.0187	1	46.14	75	22.97	29.67
chr19	5382426	5384240	5.16	5.64	4.44	1.2	0.0187	1	51.43	48	20.59	22.69
chr7	103000941	103002557	5.47	6.01	4.61	1.39	0.0188	1	35.55	93	33.26	15.71
chr4	92891844	92892979	4.06	4.8	2.47	2.32	0.0188	1	7.56	48	2.38	8.73
chr9	71948571	71951135	5.84	6.28	5.2	1.08	0.0188	1	84.71	71	38.81	34.91
chr2	70613615	70615934	5.3	5.77	4.6	1.17	0.0188	1	52.19	57	21.38	27.05
chr2	37231188	37233126	5.55	6.03	4.83	1.19	0.0188	1	47.65	83	30.89	26.18
chr15	5443377	5447230	6.84	7.27	6.23	1.04	0.0188	0.232	100.6	208	79.2	70.69
chr15	67764488	67767166	5.1	5.6	4.34	1.27	0.0188	1	52.19	45	14.26	26.18
chr11	28731308	28736115	7.03	7.46	6.42	1.04	0.0189	0.232	108.16	243	83.16	88.14
chr13	25401484	25402883	5.54	6.07	4.69	1.39	0.0189	1	35.55	99	34.06	17.45
chr19	27892744	27894832	5.97	6.44	5.28	1.16	0.0189	1	70.34	103	49.9	27.93
chr18	73973813	73975367	4.38	3.33	4.99	-1.66	0.0189	1	12.1	8	28.51	34.91
chr15	90437393	90438933	5.03	5.59	4.11	1.48	0.019	1	23.45	73	19.8	14.84
chr18	40164170	40166029	4.42	3.38	5.02	-1.63	0.019	1	9.83	11	24.55	40.14
chr4	88947455	88950065	5.98	6.47	5.24	1.23	0.019	1	75.64	102	54.65	20.94
chr16	87091168	87092726	5.17	5.68	4.38	1.3	0.019	1	41.6	61	27.72	13.96
chr19	24580461	24590713	8.09	8.4	7.68	0.72	0.019	0.233	329.77	347	244.73	166.68
chr8	125511896	125514490	5.66	6.13	4.95	1.18	0.019	1	51.43	89	34.85	27.05
chr5	86655114	86657183	5.68	6.16	4.94	1.22	0.019	1	46.14	97	30.1	31.42
chr17	59697089	59698792	5.2	5.7	4.43	1.27	0.019	1	68.83	35	21.38	21.82
chr18	89347554	89350239	5.04	4.19	5.57	-1.38	0.019	1	10.59	26	34.85	60.22
chr2	86022276	86023902	4.74	5.36	3.61	1.75	0.019	1	15.13	67	7.92	16.58
chr15	59349541	59354439	6.87	7.29	6.29	1	0.0191	0.233	131.61	181	99.79	56.73
chr12	83423449	83424884	5.13	5.63	4.36	1.26	0.0191	1	59.75	39	15.84	25.31
chr4	36600797	36602093	4.84	5.45	3.74	1.71	0.0191	1	14.37	73	11.09	15.71
chr11	96001912	96003454	5.73	6.22	5	1.22	0.0191	1	46.89	102	32.47	31.42
chr17	15013829	15015621	5.05	5.55	4.29	1.26	0.0191	1	38.57	55	19.8	19.2
chr3	79847902	79849509	4.36	3.31	4.97	-1.66	0.0192	1	6.81	13	28.51	34.04
chr18	41959432	41960824	3.86	2.4	4.56	-2.16	0.0192	1	7.56	3	15.05	32.29
chr13	107749637	107753409	6.28	6.74	5.6	1.14	0.0192	0.234	69.58	144	41.98	54.98
chr2	83549605	83551363	5.51	6	4.76	1.24	0.0193	1	46.14	82	34.06	20.07
chr3	131530536	131532190	5.16	4.41	5.65	-1.23	0.0193	1	19.67	23	60.98	39.27
chr2	68820267	68822729	5.71	6.25	4.85	1.4	0.0194	1	33.28	119	34.85	22.69
chr19	20111976	20114098	5.39	5.86	4.7	1.16	0.0194	1	65.05	51	28.51	23.56
chr12	101343119	101344748	4.69	3.77	5.25	-1.48	0.0194	1	8.32	19	33.26	42.76
chr9	82853706	82856157	4.86	5.37	4.05	1.31	0.0194	1	41.6	41	16.63	16.58
chr1	109715138	109717592	4.78	3.92	5.31	-1.38	0.0194	1	11.35	19	36.43	42.76
chr5	152115575	152119750	6.91	7.33	6.31	1.02	0.0195	0.237	128.58	194	103.75	54.98
chr10	16296708	16300270	6.47	6.96	5.72	1.24	0.0195	0.237	63.53	185	64.15	41.02
chr15	102240867	102242552	4.71	5.26	3.81	1.44	0.0195	1	29.5	47	15.05	13.09
chr2	44823769	44826501	6.49	6.94	5.84	1.09	0.0195	0.237	90.01	155	72.07	42.76
chr5	82322713	82324616	5.14	5.68	4.29	1.39	0.0196	1	27.23	75	19.01	20.07
chr9	38108664	38109851	4.32	4.95	3.18	1.77	0.0196	1	18.91	43	10.3	7.85
chr8	26278029	26280429	5.04	5.53	4.29	1.23	0.0196	1	49.16	43	18.22	20.94
chr18	89279155	89281304	4.82	3.99	5.34	-1.34	0.0196	1	15.88	16	36.43	44.51
chr2	75116248	75118463	4.8	5.36	3.87	1.49	0.0196	1	33.28	49	21.38	7.85
chr15	60699751	60702025	5.22	4.46	5.72	-1.26	0.0196	1	18.91	25	69.7	35.78
chr11	73130752	73133779	6.39	6.81	5.81	1	0.0196	0.238	111.18	113	65.74	46.25
chr19	20674304	20677789	6.12	6.55	5.48	1.07	0.0197	1	93.03	95	55.44	34.04
chr3	39615168	39616936	4.45	3.45	5.04	-1.59	0.0197	1	12.86	9	32.47	33.16
chr7	108404549	108407250	5.22	5.7	4.52	1.18	0.0197	1	53.7	50	20.59	25.31
chr6	120568203	120570140	4.8	3.9	5.35	-1.45	0.0197	1	9.83	20	28.51	53.23
chrX	17649083	17652163	5.38	5.89	4.58	1.31	0.0197	1	71.85	47	34.85	13.09
chr2	144277469	144279077	5.28	5.75	4.57	1.18	0.0197	1	46.89	61	21.38	26.18
chr2	80179321	80181002	5.63	6.12	4.88	1.24	0.0197	1	42.36	97	30.1	28.8
chr2	84478269	84480101	5.09	5.59	4.33	1.26	0.0198	1	46.14	50	25.34	14.84
chr2	95477168	95478248	4.65	5.27	3.51	1.77	0.0199	1	14.37	63	7.92	14.84
chr3	30547878	30550199	5.01	4.22	5.51	-1.29	0.0199	1	17.4	20	56.23	34.91
chrX	94442122	94443827	4.44	5.05	3.35	1.71	0.0199	1	23.45	43	14.26	6.11
chr15	80472081	80472795	4.7	5.35	3.5	1.85	0.0199	1	10.59	71	8.71	13.96
chr16	71639665	71641434	4.97	5.57	3.92	1.65	0.0199	1	15.88	79	11.09	19.2
chr6	135461935	135463971	5	4.24	5.49	-1.26	0.0199	1	19.67	18	41.98	48
chr14	44902395	44904873	2.87	3.69	0.77	2.92	0.0199	1	6.81	19	0.79	2.62
chr15	63242403	63248173	7.15	7.51	6.66	0.85	0.0199	0.241	161.1	203	103.75	98.61
chr2	148681311	148684021	6.57	7.03	5.9	1.13	0.02	0.241	90.01	171	78.41	41.02
chr11	100834951	100836216	5.43	5.91	4.72	1.19	0.02	1	49.16	71	31.68	20.94
chr2	104694978	104697274	5.73	6.19	5.04	1.14	0.02	1	56.73	89	37.22	28.8
chr17	4768958	4770720	5.72	6.18	5.04	1.14	0.02	1	65.8	79	23.76	41.89
chr8	94052923	94054428	5.89	6.42	5.06	1.36	0.0201	1	36.31	135	32.47	34.04
chr19	21151471	21154108	6.76	7.14	6.25	0.9	0.0201	0.242	139.93	143	78.41	73.31
chr4	11249075	11251490	5.7	6.18	4.98	1.2	0.0202	1	47.65	97	30.89	32.29
chr6	137174325	137176033	4.8	3.93	5.34	-1.42	0.0202	1	20.42	10	41.98	39.27
chr8	93686886	93690186	6.38	6.8	5.79	1.01	0.0202	0.242	96.06	127	63.36	47.13
chr1	154975589	154979027	7.81	8.2	7.29	0.9	0.0202	0.242	187.58	399	132.26	181.52
chr2	21126072	21128711	6.31	6.74	5.69	1.05	0.0202	0.242	82.44	131	47.52	55.85
chr4	31330917	31332486	5.38	5.86	4.65	1.21	0.0202	1	43.11	73	21.38	28.8
chr7	87928593	87929987	4.66	5.23	3.7	1.53	0.0202	1	24.2	51	10.3	15.71
chr12	85063478	85065116	4.61	3.59	5.2	-1.6	0.0202	1	18.15	6	34.06	39.27
chr2	17898808	17900253	5.19	5.7	4.39	1.31	0.0203	1	33.28	71	24.55	17.45
chr10	95650400	95651936	4.49	5.09	3.45	1.64	0.0203	1	21.18	47	8.71	13.09
chr8	25783198	25785172	5.64	6.09	4.98	1.12	0.0203	1	57.48	79	33.26	29.67
chr1	184069182	184071056	4.86	4.06	5.37	-1.31	0.0203	1	17.4	16	43.56	39.27
chr2	102667727	102669829	5.77	6.25	5.04	1.2	0.0204	1	49.16	103	37.22	28.8
chr11	43732352	43734326	5.64	6.15	4.84	1.31	0.0204	1	41.6	100	37.22	20.07
chr13	63188912	63191754	6.28	6.7	5.68	1.02	0.0204	0.243	123.29	85	52.27	50.62
chr4	131824634	131826961	6.04	6.48	5.39	1.09	0.0204	1	73.37	105	49.1	34.91
chr13	32260866	32262256	4.63	5.21	3.64	1.58	0.0205	1	21.18	53	12.67	12.22
chr10	48280206	48281748	4.09	2.79	4.76	-1.97	0.0205	1	6.81	7	41.18	13.09
chr10	26106438	26108521	4.52	3.51	5.1	-1.59	0.0205	1	12.86	10	45.14	23.56
chr12	101591512	101593321	6.23	6.7	5.55	1.15	0.0205	0.244	64.29	143	49.9	43.63
chr19	21351183	21357993	7.17	7.53	6.69	0.83	0.0206	0.244	204.22	165	107.71	99.49
chr5	22928547	22930379	5.6	6.05	4.94	1.11	0.0206	1	58.24	74	31.68	29.67
chr9	42290951	42293562	5.97	6.4	5.35	1.06	0.0206	1	73.37	96	39.6	41.89
chrX	142526450	142529671	5.72	6.25	4.88	1.37	0.0206	1	37.82	114	38.81	20.07
chr5	104134533	104136771	6.08	6.56	5.36	1.19	0.0206	1	57.48	131	48.31	34.04
chr10	102077894	102080229	5.41	5.89	4.7	1.18	0.0206	1	70.34	48	19.8	32.29
chr2	65457516	65459037	5.15	5.64	4.41	1.23	0.0207	1	38.57	61	20.59	21.82
chr10	84624294	84625349	4.95	5.46	4.17	1.29	0.0207	1	37.06	51	15.05	20.94
chr16	60177155	60178720	4.85	5.45	3.8	1.66	0.0207	1	16.64	71	18.22	9.6
chr14	99604077	99605691	5.06	5.55	4.32	1.23	0.0207	1	53.7	40	18.22	21.82
chr17	43074589	43077865	7.11	7.5	6.56	0.94	0.0207	0.245	128.58	234	95.83	93.38
chr2	71531883	71535617	5.86	6.3	5.22	1.08	0.0207	1	73.37	84	30.89	43.63
chr15	96833643	96835490	4.84	5.36	4.01	1.35	0.0207	1	33.28	49	18.22	13.96
chr2	60420234	60423158	6.16	6.59	5.55	1.04	0.0208	1	79.42	113	48.31	45.38
chr4	134037997	134039107	4.49	5.06	3.54	1.52	0.0208	1	35.55	31	11.88	11.35
chrX	96901252	96903365	3.22	4.02	1.27	2.75	0.0208	1	26.47	6	3.96	0.87
chr13	22031614	22034107	5.47	5.93	4.77	1.16	0.0208	1	61.26	61	19.8	34.91
chr6	79743706	79745616	4.47	5.06	3.44	1.62	0.0209	1	21.93	45	9.5	12.22
chr2	60951851	60953970	4.82	5.34	4.02	1.32	0.0209	1	37.82	43	16.63	15.71
chr6	124434235	124437747	7.08	7.51	6.45	1.07	0.0209	0.248	106.65	259	104.54	69.82
chr2	72203321	72204968	4.5	5.08	3.52	1.56	0.0209	1	35.55	32	15.05	7.85
chr10	57717356	57719156	4.99	4.22	5.48	-1.26	0.021	1	17.4	20	38.02	51.49
chr11	86303356	86305804	5.5	5.96	4.8	1.16	0.021	1	62.78	62	35.64	20.07
chr15	66467569	66470431	5.24	5.71	4.53	1.18	0.021	1	50.68	54	18.22	27.93
chr6	26067736	26069794	4.51	3.51	5.09	-1.58	0.0211	1	9.83	13	22.97	45.38
chr12	120623954	120627316	6.39	6.89	5.63	1.26	0.0211	0.248	54.46	183	54.65	44.51
chrX	16654181	16655323	4.84	5.41	3.87	1.54	0.0211	1	24.2	61	20.59	8.73
chr15	99695210	99699667	6.97	7.34	6.47	0.87	0.0211	0.248	144.46	180	83.95	93.38
chr9	69872324	69874979	5.9	6.35	5.23	1.12	0.0211	1	62.02	101	32.47	42.76
chr9	78305597	78308508	5.26	5.73	4.56	1.17	0.0211	1	61.26	45	26.14	20.94
chr3	5816406	5819142	5.18	5.69	4.38	1.31	0.0211	1	46.14	57	11.09	30.54
chr2	126128032	126129741	7.3	7.99	5.95	2.04	0.0211	0.248	148.25	360	90.29	33.16
chr19	32142753	32146075	6.54	6.94	5.98	0.96	0.0212	0.248	118.75	127	73.66	52.36
chr8	35040850	35044277	6.37	6.79	5.79	1	0.0212	0.248	100.6	120	64.15	46.25
chr18	61041652	61043856	4.74	3.9	5.27	-1.37	0.0212	1	15.88	14	40.39	36.65
chr17	58901687	58904134	2.32	-0.19	3.18	-3.37	0.0213	1	0.76	1	10.3	7.85
chr15	34938902	34941806	5.56	6.01	4.9	1.1	0.0213	1	57.48	71	30.1	29.67
chr18	27777902	27780455	4.55	3.57	5.13	-1.56	0.0213	1	6.81	17	41.18	28.8
chr10	102102028	102104157	4.99	5.55	4.06	1.49	0.0213	1	26.47	67	23.76	9.6
chrX	96011350	96013049	3.87	4.59	2.4	2.19	0.0213	1	37.06	11	7.92	2.62
chr15	63696602	63698286	2.32	3.2	-0.26	3.46	0.0213	1	14.37	4	0.79	0.87
chrX	97881326	97883078	4.21	4.87	2.94	1.93	0.0214	1	41.6	17	11.88	3.49
chr8	61798558	61802366	6.33	6.81	5.59	1.22	0.0214	0.249	55.97	169	47.52	48.87
chr19	7243153	7247065	6.25	6.72	5.57	1.14	0.0214	0.249	117.24	93	67.32	27.93
chr7	99769362	99770483	5.05	5.64	4.04	1.6	0.0214	1	16.64	83	11.88	20.94
chr4	83021065	83023135	5.4	5.87	4.7	1.17	0.0215	1	47.65	69	29.3	22.69
chr2	4987758	4989435	4.47	5.08	3.4	1.68	0.0215	1	20.42	47	7.13	13.96
chr11	101464748	101467980	6.38	6.78	5.82	0.96	0.0215	0.249	113.45	107	53.06	60.22
chr12	70488124	70492154	7.07	7.47	6.51	0.97	0.0215	0.249	138.41	217	114.84	67.2
chr19	34995723	34998935	6.29	6.72	5.68	1.04	0.0215	0.249	129.34	81	57.02	45.38
chr6	58775430	58779378	6.52	7	5.8	1.2	0.0215	0.249	62.78	193	54.65	56.73
chr3	142592365	142594317	4.64	3.76	5.18	-1.42	0.0216	1	12.1	15	34.85	37.53
chr2	39081234	39082811	4.64	5.19	3.73	1.46	0.0216	1	27.99	45	13.46	13.09
chr10	17303393	17305502	5.48	5.97	4.73	1.24	0.0216	1	38.57	87	27.72	25.31
chr17	61343241	61344565	4.73	5.3	3.76	1.54	0.0216	1	21.93	57	16.63	10.47
chr10	120901598	120904357	5.56	6	4.91	1.1	0.0216	1	70.34	58	27.72	32.29
chr13	78557762	78559538	3.99	2.79	4.64	-1.85	0.0216	1	6.81	7	24.55	25.31
chr5	58159794	58161158	5.12	5.64	4.3	1.34	0.0216	1	31.01	69	24.55	14.84
chr5	147514863	147516067	5.11	5.61	4.37	1.24	0.0217	1	42.36	55	15.05	26.18
chr10	67552612	67554743	5.58	6.1	4.74	1.37	0.0217	1	47.65	90	41.18	12.22
chr12	52225540	52227027	4.31	3.27	4.91	-1.64	0.0218	1	8.32	11	27.72	32.29
chr11	48629175	48638100	7.72	8.03	7.32	0.71	0.0218	0.252	254.89	268	163.94	155.34
chr17	66309620	66312597	7.8	8.49	6.43	2.06	0.0218	0.252	147.49	571	86.33	86.4
chr6	119784681	119786545	4.92	4.16	5.42	-1.27	0.0219	1	16.64	19	48.31	37.53
chrX	140146163	140147628	3.78	4.49	2.28	2.21	0.0219	1	34.04	11	7.13	2.62
chr10	28816359	28817351	4.06	4.78	2.54	2.24	0.0219	1	6.05	49	5.54	6.11
chr19	32747510	32756594	7.54	7.88	7.1	0.78	0.022	0.252	250.35	221	159.19	115.2
chr15	42437522	42440035	5.69	6.13	5.04	1.09	0.022	1	64.29	76	37.22	28.8
chr19	25053498	25054713	4.73	5.28	3.85	1.43	0.022	1	28.74	49	17.42	11.35
chr5	4221871	4223164	5.28	5.79	4.48	1.3	0.022	1	41.6	69	31.68	13.09
chr2	78217524	78221901	6.47	6.88	5.91	0.96	0.022	0.253	105.89	129	66.53	54.11
chr18	6232127	6234357	4.76	3.91	5.29	-1.38	0.022	1	18.15	12	35.64	42.76
chr6	28741181	28743704	4.97	4.16	5.49	-1.33	0.0221	1	22.69	13	34.85	54.98
chr13	6263589	6265851	4.48	3.38	5.09	-1.71	0.0221	1	15.88	5	25.34	42.76
chr14	74132846	74135488	4.61	5.16	3.7	1.47	0.0221	1	44.63	27	11.09	14.84
chr17	61728153	61729568	4.6	5.22	3.48	1.74	0.0221	1	13.61	61	11.88	10.47
chr7	121622949	121624154	5.27	5.74	4.54	1.2	0.0222	1	58.24	49	30.1	16.58
chr2	118871894	118873737	5.81	6.3	5.04	1.26	0.0222	1	43.11	115	38.81	27.05
chrX	12667775	12669636	4.13	4.78	2.88	1.9	0.0223	1	40.09	15	9.5	5.24
chr6	126075869	126077716	4.64	3.75	5.18	-1.44	0.0223	1	9.83	17	32.47	40.14
chr2	58336462	58338829	5.93	6.4	5.24	1.16	0.0223	1	53.7	115	39.6	35.78
chr2	80105351	80107354	4.99	5.48	4.25	1.23	0.0223	1	46.14	43	20.59	17.45
chr2	81572826	81577760	6.73	7.12	6.21	0.91	0.0223	0.256	121.77	156	72.07	75.92
chr6	118431463	118434021	5.25	4.55	5.71	-1.16	0.0223	1	18.91	28	48.31	56.73
chr1	12647535	12648890	4.87	5.43	3.93	1.5	0.0224	1	21.18	65	17.42	13.09
chr16	43697475	43700283	6.2	6.64	5.57	1.07	0.0224	0.256	90.01	109	60.98	34.04
chr12	34760449	34762044	5.44	5.9	4.75	1.16	0.0224	1	47.65	72	30.1	23.56
chr3	117957078	117958953	4.64	3.73	5.19	-1.46	0.0224	1	13.61	13	26.93	46.25
chr5	77679086	77682341	6.35	6.76	5.76	1	0.0224	0.256	108.16	109	65.74	42.76
chr10	99623161	99625031	5.11	5.62	4.33	1.29	0.0224	1	37.06	61	26.14	13.96
chr19	24576675	24579777	6.02	6.45	5.41	1.04	0.0224	1	93.79	81	49.9	34.91
chr1	107822238	107823286	5.29	5.81	4.47	1.34	0.0225	1	30.25	82	26.14	18.33
chr6	126989228	126991453	5.05	4.32	5.54	-1.22	0.0225	1	18.91	21	39.6	53.23
chr8	34981443	34983435	5.09	5.57	4.37	1.2	0.0225	1	55.21	40	21.38	20.07
chr11	86389513	86396801	8.1	8.39	7.73	0.66	0.0225	0.256	307.84	364	226.51	198.97
chr13	22131565	22136968	7.02	7.38	6.53	0.85	0.0225	0.256	188.33	145	91.08	93.38
chr2	49690123	49691653	4.3	4.91	3.24	1.66	0.0225	1	37.06	23	11.09	7.85
chr15	98424539	98426463	5.1	5.6	4.33	1.27	0.0226	1	36.31	61	15.05	25.31
chrX	97989485	97990871	4.56	5.12	3.62	1.5	0.0226	1	41.6	28	15.05	9.6
chr3	148574961	148577180	4.8	3.95	5.34	-1.39	0.0226	1	12.86	18	27.72	53.23
chrX	135586056	135587965	5.42	5.91	4.68	1.23	0.0226	1	52.19	68	35.64	15.71
chrX	18736140	18738811	4.93	5.47	4.04	1.43	0.0227	1	65.8	23	19.8	13.09
chr9	7269363	7272874	6.21	6.7	5.46	1.24	0.0227	0.257	52.94	155	52.27	35.78
chrX	142808216	142810272	4.31	4.95	3.17	1.78	0.0227	1	44.63	17	11.88	6.11
chr6	75139380	75141890	5.08	4.33	5.57	-1.24	0.0227	1	21.18	19	36.43	58.47
chr9	27789581	27791168	5.13	5.65	4.3	1.35	0.0227	1	28.74	72	23.76	15.71
chr18	5389279	5390471	3.95	2.71	4.61	-1.9	0.0227	1	6.05	7	18.22	30.54
chr13	94920443	94925344	6.7	7.1	6.15	0.95	0.0227	0.257	109.67	164	64.15	77.67
chr5	95052640	95058765	2.3	-0.19	3.17	-3.36	0.0228	1	0.76	1	11.88	6.11
chr12	82224506	82225518	4.97	5.56	3.95	1.61	0.0228	1	15.13	79	13.46	17.45
chr11	120661145	120663263	5.73	6.17	5.1	1.07	0.0228	1	68.83	75	29.3	39.27
chr17	74580403	74583018	5.4	5.85	4.74	1.11	0.0228	1	61.26	54	24.55	28.8
chr3	85466284	85468329	4.64	3.72	5.2	-1.48	0.0229	1	17.4	9	31.68	41.89
chr8	109833794	109837034	5.93	6.36	5.33	1.04	0.0229	1	76.39	88	43.56	36.65
chr11	102504231	102507491	6.43	6.84	5.86	0.98	0.0229	0.259	100.6	129	67.32	48.87
chr2	61416589	61418753	5.39	5.86	4.68	1.18	0.0229	1	45.38	71	19.8	31.42
chr1	163256830	163258821	5.46	5.93	4.77	1.16	0.023	1	77.9	44	29.3	25.31
chr18	29440546	29442383	4.21	3.05	4.85	-1.8	0.023	1	7.56	9	16.63	41.02
chr11	53295546	53300550	6.84	7.21	6.33	0.88	0.0231	0.26	156.57	140	71.28	89.89
chr2	169964903	169966756	5.99	6.45	5.32	1.13	0.0231	1	62.02	113	48.31	31.42
chr9	76074048	76076338	5.01	5.5	4.27	1.23	0.0231	1	44.63	46	15.05	23.56
chr11	35650216	35653090	7.05	7.45	6.5	0.95	0.0231	0.26	136.9	212	113.26	67.2
chr2	13371890	13373795	6.25	6.7	5.58	1.12	0.0232	0.26	74.12	134	60.98	34.91
chr7	34432187	34435169	3.1	1.26	3.89	-2.63	0.0232	1	3.78	1	18.22	11.35
chrX	137437980	137439493	5.82	6.29	5.14	1.15	0.0232	1	52.19	104	38.02	32.29
chr10	107452074	107453975	5.63	6.12	4.88	1.24	0.0232	1	46.14	93	19.8	39.27
chr15	81139423	81142939	6.06	6.49	5.45	1.03	0.0232	1	76.39	103	48.31	39.27
chr1	159562534	159565028	6.07	6.53	5.4	1.13	0.0232	1	65.8	119	52.27	32.29
chr5	101343736	101345204	4.94	5.43	4.19	1.24	0.0233	1	43.11	43	19.8	16.58
chr6	117491801	117493694	4.07	2.78	4.74	-1.96	0.0233	1	3.78	10	14.26	39.27
chr7	99959412	99961051	5.25	5.77	4.43	1.34	0.0233	1	27.99	81	22.97	20.07
chr2	106885880	106887115	5	5.55	4.1	1.45	0.0233	1	22.69	71	13.46	20.94
chr15	53633023	53634572	4.73	5.26	3.89	1.37	0.0234	1	41.6	35	18.22	11.35
chrX	154318310	154320833	4.43	5.1	3.14	1.95	0.0234	1	54.46	14	15.05	2.62
chr15	76983195	76986539	6.36	6.8	5.72	1.09	0.0234	0.262	72.61	151	46.73	58.47
chr15	69283253	69284798	4.86	5.41	3.95	1.46	0.0234	1	21.93	63	14.26	16.58
chr6	65561428	65562836	5.58	6.08	4.8	1.28	0.0234	1	35.55	100	25.34	30.54
chr2	19121418	19124566	6	6.5	5.23	1.27	0.0234	1	52.19	129	51.48	23.56
chr8	33016535	33019781	6.3	6.74	5.69	1.05	0.0235	0.263	96.06	117	66.53	36.65
chr10	14673047	14675197	4.56	3.66	5.11	-1.44	0.0235	1	11.35	14	34.85	34.04
chr10	69707203	69709285	4.41	3.24	5.05	-1.81	0.0235	1	15.88	3	41.98	24.44
chr8	35015313	35018054	5.89	6.33	5.26	1.07	0.0235	1	63.53	97	38.02	38.4
chr8	34098294	34101644	6.81	7.27	6.11	1.16	0.0235	0.263	72.61	237	72.86	65.45
chr2	48311736	48312604	4.59	5.16	3.63	1.54	0.0236	1	22.69	49	14.26	10.47
chr8	9975548	9978620	6.06	6.48	5.46	1.02	0.0236	1	77.15	101	45.94	41.89
chr2	22851018	22852138	5.13	5.64	4.33	1.31	0.0236	1	32.52	67	25.34	14.84
chr3	48761229	48764545	3.24	1.53	4	-2.48	0.0236	1	0.76	5	19.8	12.22
chr2	49058457	49060478	5.6	6.05	4.93	1.13	0.0236	1	56.73	76	37.22	23.56
chr10	105243741	105245608	4.5	3.54	5.07	-1.52	0.0236	1	8.32	15	27.72	39.27
chr3	88966615	88969456	6.15	6.57	5.56	1.02	0.0236	1	83.2	107	53.06	41.02
chr10	53917257	53919046	4.36	3.31	4.96	-1.65	0.0237	1	6.81	13	40.39	21.82
chr8	114165795	114169339	7.14	7.54	6.6	0.93	0.0237	0.264	127.07	244	102.96	91.63
chr3	5228399	5229910	4.74	5.3	3.82	1.48	0.0237	1	21.93	57	14.26	13.96
chrX	153103236	153104938	3.78	4.53	2.14	2.39	0.0237	1	37.06	9	7.92	0.87
chr11	97169216	97174720	7.4	7.74	6.96	0.78	0.0237	0.264	230.69	196	137.02	111.7
chr7	53174301	53177107	5.71	6.15	5.07	1.07	0.0237	1	59.75	82	33.26	34.04
chr7	128188452	128190337	5.11	5.62	4.3	1.32	0.0237	1	29.5	69	15.84	23.56
chr1	68788450	68790874	5.44	5.94	4.67	1.26	0.0238	1	35.55	87	21.38	29.67
chr11	120996794	120998942	5.69	6.12	5.06	1.07	0.0238	1	79.42	60	31.68	34.91
chr19	18804286	18808149	6.75	7.15	6.22	0.93	0.0238	0.264	130.09	153	89.5	59.34
chr5	110757252	110759675	5.24	5.71	4.55	1.15	0.0238	1	47.65	57	26.93	20.07
chr3	8927331	8928866	5.14	5.63	4.38	1.25	0.0238	1	34.04	65	19.01	22.69
chr19	21342134	21350201	7.62	7.94	7.21	0.73	0.0238	0.264	256.4	236	162.36	134.4
chr1	39817769	39819491	5.44	5.9	4.78	1.12	0.0239	1	49.16	70	27.72	27.05
chr5	91337502	91338680	4.99	5.53	4.12	1.41	0.0239	1	23.45	69	19.01	15.71
chr2	81604430	81606840	5.86	6.37	5.06	1.31	0.024	1	36.31	129	32.47	34.04
chr15	78684975	78687441	5.5	5.99	4.77	1.22	0.024	1	40.09	87	22.18	32.29
chr19	23259084	23261434	5.68	6.11	5.06	1.06	0.024	1	76.39	62	32.47	34.04
chr17	17370927	17373473	5.34	5.79	4.67	1.12	0.024	1	49.92	61	22.97	27.93
chr18	35034262	35036439	4.6	3.72	5.15	-1.43	0.024	1	14.37	12	31.68	39.27
chr9	51076715	51078868	5.49	5.99	4.71	1.28	0.024	1	34.04	93	24.55	27.93
chr17	16187727	16192924	7.1	7.52	6.51	1.01	0.024	0.266	111.18	256	105.34	76.8
chr12	56397910	56400896	5.15	4.42	5.63	-1.21	0.0241	1	21.93	21	62.57	36.65
chr5	150309983	150312279	6.41	6.87	5.74	1.13	0.0241	0.266	66.56	167	54.65	52.36
chr17	51498684	51500686	4.94	5.45	4.14	1.31	0.0241	1	32.52	55	13.46	21.82
chr5	108221524	108223929	5.89	6.36	5.2	1.16	0.0241	1	52.94	111	41.98	31.42
chr18	49873874	49875860	4.55	3.52	5.15	-1.64	0.0241	1	15.88	7	21.38	49.74
chr5	89704750	89708251	7.2	7.63	6.59	1.05	0.0241	0.266	112.7	284	118.01	74.18
chr10	62780994	62782454	4.21	3.11	4.82	-1.71	0.0241	1	5.29	12	26.14	30.54
chr3	131700141	131701797	4.4	3.37	4.99	-1.63	0.0241	1	13.61	7	26.14	37.53
chr2	32772173	32774736	5.75	6.18	5.14	1.04	0.0242	1	74.88	70	36.43	34.04
chr5	136097510	136098273	4.38	5	3.25	1.75	0.0242	1	15.13	49	10.3	8.73
chr10	111212324	111214231	5.17	5.69	4.37	1.32	0.0242	1	30.25	73	15.05	26.18
chr4	150346646	150348306	5.34	5.86	4.53	1.34	0.0243	1	29.5	87	27.72	18.33
chr4	135475697	135477206	4.83	5.34	4.04	1.3	0.0243	1	40.09	41	19.8	13.09
chr10	93211216	93213067	5.5	5.95	4.85	1.09	0.0243	1	58.24	65	32.47	25.31
chr18	47817968	47819785	4.1	2.82	4.77	-1.95	0.0243	1	9.08	5	13.46	41.02
chr5	108711109	108712040	4.2	4.88	2.89	1.99	0.0244	1	9.83	49	8.71	6.11
chr10	16753991	16755622	5.74	6.19	5.07	1.12	0.0244	1	52.19	94	34.06	33.16
chr12	58591258	58592383	5.04	5.53	4.29	1.24	0.0244	1	35.55	57	17.42	21.82
chr13	90028149	90029793	5.28	5.74	4.6	1.13	0.0245	1	53.7	53	19.8	28.8
chr19	9132208	9141749	8.4	8.75	7.94	0.81	0.0245	0.269	339.6	519	333.43	157.09
chr16	60233322	60235415	5.4	5.96	4.49	1.46	0.0245	1	21.18	103	20.59	24.44
chr18	84728576	84730678	4.71	3.88	5.23	-1.36	0.0245	1	14.37	15	32.47	42.76
chr3	137575418	137576745	5.05	4.32	5.54	-1.22	0.0245	1	15.88	24	38.02	54.98
chr12	15626080	15628029	4.66	5.19	3.82	1.37	0.0245	1	37.82	35	14.26	13.96
chr3	130588640	130591707	6.65	7.07	6.05	1.02	0.0246	0.269	94.54	174	78.41	54.11
chr19	57402512	57404126	5.21	5.71	4.44	1.27	0.0246	1	53.7	51	11.09	32.29
chr10	57677984	57680652	6.02	5.39	6.45	-1.06	0.0246	1	52.94	31	87.12	88.14
chr17	37411122	37414020	6.23	6.74	5.44	1.3	0.0246	0.269	43.11	171	46.73	40.14
chr19	54098967	54100239	4.52	5.07	3.6	1.47	0.0246	1	30.25	37	10.3	13.96
chr18	40249098	40251487	4.75	3.92	5.27	-1.34	0.0246	1	14.37	16	31.68	45.38
chr15	15830067	15831539	4.91	5.41	4.14	1.27	0.0246	1	40.09	45	21.38	13.96
chr12	53647968	53651418	5.67	6.13	5	1.14	0.0247	1	49.16	91	33.26	30.54
chr15	11693041	11694409	4.66	3.8	5.2	-1.4	0.0247	1	9.83	18	34.06	39.27
chr11	99440994	99444268	6.98	7.36	6.47	0.88	0.0247	0.27	168.67	159	108.5	68.94
chr15	77711382	77717008	6.91	7.28	6.41	0.88	0.0247	0.27	130.85	181	87.91	82.03
chr15	95105943	95109363	6.15	6.62	5.45	1.18	0.0248	1	55.97	141	35.64	51.49
chr17	47753199	47757921	6.14	6.56	5.56	1	0.0249	1	86.22	102	41.18	53.23
chr1	175696784	175698025	4.91	5.43	4.11	1.31	0.0249	1	31.01	55	19.8	14.84
chr4	24475112	24476203	4.25	4.94	2.87	2.06	0.0249	1	8.32	53	10.3	4.36
chr18	80245866	80247531	4.27	3.24	4.87	-1.64	0.025	1	9.83	9	24.55	34.04
chr8	88977728	88978910	4.85	5.37	4	1.37	0.025	1	27.99	55	19.01	13.09
chr8	125544453	125548869	6.63	7.01	6.11	0.9	0.025	0.271	120.26	138	74.45	63.71
chr17	91560374	91562195	5.24	5.79	4.33	1.47	0.025	1	21.93	89	26.14	13.96
chr6	54925627	54928896	3.87	2.62	4.53	-1.91	0.025	1	5.29	7	18.22	27.93
chr18	14596123	14598711	4.37	3.38	4.96	-1.58	0.0251	1	9.83	11	24.55	37.53
chr2	83567503	83570362	6.53	6.93	5.97	0.96	0.0251	0.271	99.84	144	54.65	70.69
chr5	8052333	8056562	6.74	7.18	6.12	1.06	0.0251	0.271	105.13	184	93.46	45.38
chr2	58893266	58896770	5.84	6.28	5.2	1.08	0.0251	1	59.75	96	39.6	34.04
chr1	72290822	72292470	5.59	6.06	4.89	1.17	0.0251	1	56.73	77	18.22	41.02
chr5	21847314	21849141	4.9	5.42	4.08	1.34	0.0251	1	28.74	57	19.8	13.96
chr12	112802095	112804497	5.3	5.77	4.6	1.17	0.0251	1	43.11	66	19.8	28.8
chr19	35038721	35043971	6.71	7.09	6.18	0.91	0.0251	0.271	149	124	84.74	60.22
chr19	42618287	42620383	5.39	5.84	4.74	1.11	0.0252	1	65.8	49	24.55	28.8
chr19	20527703	20529634	6.78	7.24	6.1	1.14	0.0252	0.271	90.76	211	94.25	42.76
chr16	45945207	45947741	6.61	7.06	5.95	1.11	0.0252	0.271	72.61	194	66.53	56.73
chr10	116432300	116434092	5.58	6.09	4.8	1.29	0.0252	1	37.06	99	35.64	20.07
chr19	5620500	5628091	7.35	7.7	6.91	0.79	0.0252	0.271	195.9	219	137.81	102.11
chr10	23583713	23585643	5.16	5.65	4.42	1.23	0.0252	1	35.55	65	24.55	18.33
chr13	4706042	4707910	5.64	6.16	4.84	1.32	0.0252	1	31.77	111	30.1	27.05
chr7	30176110	30177460	4.91	4.15	5.4	-1.26	0.0252	1	17.4	18	35.64	48.87
chr17	48321826	48323768	5.92	6.43	5.12	1.31	0.0252	1	37.06	135	30.1	39.27
chr5	123989501	123996837	5.26	5.76	4.51	1.25	0.0252	1	33.28	75	25.34	20.07
chr2	58563312	58565467	5.22	5.68	4.53	1.15	0.0253	1	45.38	57	25.34	20.94
chr2	109994913	109997127	6.12	6.55	5.49	1.06	0.0253	1	69.58	118	50.69	39.27
chr12	35876289	35879116	5.98	6.44	5.3	1.14	0.0253	1	58.24	116	48.31	30.54
chr6	89396343	89397617	4.35	3.31	4.95	-1.64	0.0253	1	9.83	10	20.59	41.02
chr17	67503408	67505601	4.88	5.39	4.11	1.28	0.0254	1	44.63	39	21.38	13.09
chr15	70464715	70466434	4.47	5.09	3.36	1.73	0.0254	1	21.18	47	3.96	16.58
chr1	161990280	161991051	4.14	4.83	2.79	2.04	0.0254	1	9.83	47	9.5	4.36
chr13	54709409	54711331	5.73	6.17	5.1	1.08	0.0254	1	58.24	86	30.89	37.53
chr15	10745447	10750387	7.72	8.09	7.22	0.86	0.0254	0.272	173.21	370	154.44	143.99
chr11	86664791	86667378	6.06	6.51	5.41	1.1	0.0254	1	61.26	121	45.14	40.14
chr17	42953716	42955163	4.79	5.3	3.99	1.31	0.0255	1	34.79	44	13.46	18.33
chr5	143680270	143683518	6.36	6.79	5.75	1.05	0.0255	0.272	74.88	147	51.48	55.85
chr8	67878563	67880813	5.31	5.78	4.61	1.17	0.0255	1	40.84	69	26.93	21.82
chr10	47696240	47697772	4.08	2.89	4.73	-1.84	0.0255	1	9.83	5	19.8	33.16
chr4	89092530	89095582	6.7	7.12	6.1	1.02	0.0255	0.272	98.33	179	83.95	53.23
chr4	88584514	88586746	5.23	5.69	4.54	1.16	0.0255	1	41.6	62	24.55	21.82
chr13	37806094	37808628	5.54	4.89	5.99	-1.09	0.0255	1	23.45	36	56.23	70.69
chr1	165442876	165444071	4.89	5.48	3.87	1.61	0.0256	1	14.37	75	11.88	17.45
chr15	40318947	40320743	5.64	6.14	4.88	1.27	0.0256	1	42.36	99	39.6	19.2
chr19	4662740	4673546	8.12	8.44	7.72	0.71	0.0256	0.272	331.28	361	262.94	159.7
chr2	75446025	75449853	6.63	7	6.11	0.89	0.0256	0.272	121.77	135	71.28	67.2
chr18	24515791	24520178	5.5	4.81	5.97	-1.16	0.0256	1	34.04	22	47.52	77.67
chr2	24150098	24151517	4.61	5.18	3.67	1.51	0.0257	1	23.45	49	15.84	9.6
chr17	87500333	87503779	6.19	6.63	5.55	1.07	0.0257	0.272	66.56	131	45.94	48
chr2	177937917	177940028	4.55	3.62	5.11	-1.48	0.0257	1	13.61	11	43.56	25.31
chr3	107886463	107890951	6.87	6.36	7.24	-0.89	0.0257	0.272	96.81	67	141.77	161.45
chr6	79175302	79177201	3.37	1.86	4.09	-2.23	0.0257	1	2.27	5	15.84	18.33
chr8	90640773	90644163	6.67	7.07	6.13	0.94	0.0257	0.272	105.13	163	64.94	75.05
chr1	123998405	124000649	5.45	5.97	4.61	1.36	0.0257	1	28.74	97	17.42	31.42
chr16	32803273	32804903	4.94	5.45	4.13	1.31	0.0257	1	36.31	51	23.76	11.35
chr10	107098942	107100705	5.07	5.54	4.38	1.16	0.0257	1	46.14	47	19.8	21.82
chr19	10391509	10398793	7.57	7.95	7.05	0.89	0.0258	0.272	316.91	176	168.7	96.87
chr2	45543251	45545930	5.54	5.98	4.91	1.07	0.0258	1	64.29	62	33.26	27.05
chr3	142019896	142023198	6.59	7	6.01	1	0.0258	0.272	94.54	162	75.24	53.23
chr6	117810830	117812967	5.27	5.78	4.46	1.33	0.0258	1	27.23	83	22.18	21.82
chr2	181259248	181261317	6.01	6.5	5.26	1.24	0.0258	1	43.87	137	35.64	41.02
chr11	101275097	101277165	5.75	6.18	5.13	1.04	0.0258	1	69.58	75	39.6	30.54
chr7	88324092	88325259	4.77	5.37	3.73	1.64	0.0258	1	29.5	53	22.97	3.49
chr5	5685861	5690843	6.99	7.42	6.37	1.05	0.0258	0.272	109.67	233	109.3	55.85
chr8	79655652	79657995	5.55	6.03	4.82	1.21	0.0259	1	45.38	85	19.01	37.53
chr17	71339881	71349885	7.88	8.18	7.51	0.67	0.0259	0.272	273.8	306	182.16	183.27
chr7	119788829	119791506	6.16	6.59	5.53	1.06	0.0259	1	69.58	123	51.48	41.02
chr15	66187640	66189531	4.15	4.76	3.05	1.71	0.0259	1	33.28	21	8.71	7.85
chr1	14474137	14475530	5.82	6.27	5.17	1.1	0.0259	1	64.29	90	45.14	27.05
chr2	19573426	19574980	4.3	4.9	3.27	1.63	0.0259	1	22.69	37	7.92	11.35
chrX	99862135	99863127	4.64	5.27	3.5	1.77	0.0259	1	14.37	63	17.42	5.24
chr13	110484171	110485198	4.89	5.47	3.91	1.56	0.0259	1	15.88	73	12.67	17.45
chr8	46612715	46615731	6.73	7.14	6.15	0.99	0.026	0.273	94.54	187	72.86	68.94
chr4	40723221	40724539	4.73	5.26	3.9	1.36	0.026	1	29.5	47	15.05	14.84
chr15	39379882	39381380	5.2	5.69	4.47	1.22	0.026	1	40.09	63	28.51	15.71
chr3	159545547	159549200	6.74	7.11	6.23	0.88	0.026	0.273	129.34	147	80.78	69.82
chr1	81632207	81633845	5.4	5.86	4.73	1.13	0.0261	1	55.21	61	19.01	34.04
chr1	69413649	69414328	4	4.72	2.5	2.21	0.0261	1	7.56	45	8.71	2.62
chr2	141533122	141536158	5.9	6.34	5.26	1.08	0.0261	1	61.26	101	43.56	33.16
chr11	42999542	43001706	5.85	6.33	5.12	1.2	0.0261	1	47.65	113	26.14	43.63
chr18	23963501	23965634	4.97	4.22	5.46	-1.23	0.0262	1	14.37	23	38.02	49.74
chr13	23529383	23531133	5.29	5.75	4.62	1.13	0.0262	1	44.63	63	22.97	26.18
chr3	126087441	126089008	5.6	6.05	4.95	1.1	0.0262	1	51.43	81	27.72	34.04
chr17	75266103	75267502	5.01	5.55	4.15	1.4	0.0262	1	26.47	67	11.09	24.44
chr6	86742439	86744215	4.75	3.9	5.28	-1.38	0.0262	1	12.86	17	26.93	50.62
chr11	75488924	75493727	7.04	7.43	6.5	0.93	0.0262	0.275	122.53	222	103.75	76.8
chr8	12758221	12759359	4.85	5.4	3.94	1.46	0.0262	1	20.42	64	15.84	14.84
chr12	10122478	10124211	4.59	3.72	5.13	-1.41	0.0263	1	14.37	12	32.47	37.53
chr9	59315642	59318159	5.47	5.95	4.75	1.2	0.0263	1	48.41	75	36.43	17.45
chr19	42240272	42248836	7.97	8.26	7.61	0.65	0.0263	0.275	294.98	317	183.74	205.96
chr11	121558886	121560965	5.22	5.69	4.52	1.17	0.0264	1	46.14	57	28.51	17.45
chrX	144147440	144149363	4.54	5.09	3.62	1.47	0.0264	1	40.09	28	15.05	9.6
chrX	14358858	14361388	4.44	5.03	3.42	1.61	0.0265	1	46.14	19	12.67	8.73
chr7	146067546	146069541	4.34	3.22	4.97	-1.75	0.0265	1	13.61	5	19.8	42.76
chr9	96550046	96551369	5.21	5.76	4.31	1.45	0.0265	1	19.67	89	20.59	19.2
chr12	57931067	57932634	5.96	6.44	5.23	1.2	0.0265	1	46.14	127	40.39	34.91
chr19	9253056	9256702	6.22	6.65	5.61	1.04	0.0265	0.276	115.72	85	62.57	34.91
chr18	34613203	34615176	4.19	2.98	4.84	-1.85	0.0265	1	6.81	9	12.67	44.51
chr1	71522097	71526189	6.43	6.89	5.75	1.14	0.0265	0.276	62.78	175	48.31	59.34
chr15	88339448	88341239	4.88	5.37	4.13	1.24	0.0265	1	38.57	44	16.63	18.33
chr2	65982219	65983235	5.22	5.76	4.36	1.4	0.0265	1	23.45	85	15.84	25.31
chr2	11379292	11380986	5.83	6.27	5.18	1.1	0.0266	1	59.75	95	43.56	28.8
chr2	65282782	65285035	5.05	5.52	4.35	1.17	0.0266	1	44.63	47	19.01	21.82
chr3	151804148	151807046	6.46	6.86	5.91	0.95	0.0266	0.277	95.3	137	59.4	61.09
chr1	88519710	88521200	5.12	5.66	4.23	1.43	0.0266	1	20.42	81	16.63	20.94
chr9	3402394	3405029	6.09	6.54	5.44	1.1	0.0266	1	60.51	125	39.6	47.13
chr12	76802606	76804536	6.56	7	5.93	1.07	0.0267	0.277	79.42	177	72.86	48.87
chr7	132467124	132468209	4.69	5.3	3.6	1.7	0.0267	1	15.88	63	18.22	6.11
chr3	108900632	108902243	5	5.47	4.29	1.18	0.0267	1	47.65	41	19.8	19.2
chr14	21116690	21118644	5.84	6.29	5.18	1.1	0.0267	1	55.21	101	40.39	32.29
chr13	81382861	81384796	4.14	2.79	4.82	-2.03	0.0267	1	12.86	1	27.72	28.8
chr14	76878317	76880237	5.32	5.79	4.61	1.17	0.0267	1	38.57	72	24.55	24.44
chr15	93573821	93576204	6.08	6.55	5.36	1.18	0.0267	1	61.26	126	56.23	26.18
chr8	113153312	113154980	5.12	5.61	4.38	1.23	0.0268	1	40.84	57	27.72	13.96
chr12	36417797	36421950	7.19	7.59	6.64	0.95	0.0268	0.277	149	237	133.06	66.32
chr13	41011497	41013373	5.7	6.15	5.04	1.1	0.0268	1	53.7	88	38.02	27.93
chr9	43092587	43094216	4.23	3.2	4.83	-1.63	0.0268	1	8.32	10	24.55	32.29
chr3	88447522	88449367	4.84	3.95	5.38	-1.43	0.0269	1	21.93	9	28.51	54.98
chr18	24015775	24018084	4.62	3.63	5.19	-1.56	0.0269	1	9.83	15	18.22	54.98
chr1	175841863	175844039	5.17	5.71	4.32	1.38	0.0269	1	26.47	78	26.93	13.09
chr12	36360583	36362439	5.05	5.54	4.31	1.23	0.0269	1	34.04	59	21.38	18.33
chr15	3196628	3199130	5.99	6.46	5.29	1.17	0.0269	1	49.16	127	37.22	41.02
chr6	131289114	131291880	7.4	8.06	6.13	1.94	0.0269	0.277	114.21	421	65.74	74.18
chr18	84321330	84324492	5.25	4.52	5.73	-1.21	0.0269	1	21.93	24	34.06	72.43
chr19	60113095	60119665	7.04	7.42	6.52	0.9	0.0269	0.277	153.54	188	66.53	116.94
chr11	51076021	51079046	6.32	6.72	5.75	0.97	0.0269	0.277	86.22	125	49.9	57.6
chr2	79405434	79408218	6.57	6.97	6.01	0.96	0.027	0.277	94.54	157	60.19	68.94
chr1	45731425	45733335	4.94	5.46	4.11	1.34	0.027	1	62.78	25	19.8	14.84
chr3	100086371	100088636	5.25	4.55	5.72	-1.17	0.027	1	28.74	18	43.56	61.96
chr15	62330282	62333520	6.13	6.58	5.46	1.12	0.027	1	59.75	132	50.69	37.53
chr6	133503406	133505075	5.27	5.82	4.37	1.44	0.027	1	25.72	87	30.1	11.35
chr11	100085583	100087664	4.95	5.43	4.23	1.2	0.027	1	43.11	43	17.42	20.07
chr4	39034577	39036014	4.67	5.2	3.81	1.4	0.0271	1	28.74	45	16.63	11.35
chr19	53071943	53074172	5.41	5.87	4.73	1.15	0.0271	1	70.34	47	19.01	34.04
chr2	13400264	13404906	6.84	7.23	6.3	0.92	0.0271	0.278	120.26	179	93.46	64.58
chr5	34877251	34879701	6.32	6.79	5.63	1.16	0.0271	0.278	64.29	157	63.36	35.78
chr3	125994237	125996174	5.91	6.35	5.29	1.05	0.0272	1	62.78	100	35.64	42.76
chr3	126624118	126625539	5.75	6.18	5.12	1.06	0.0272	1	58.24	87	37.22	32.29
chr2	5223481	5224988	4.64	5.19	3.75	1.43	0.0272	1	31.77	41	18.22	8.73
chr17	81232079	81233432	5.01	5.53	4.2	1.32	0.0272	1	27.23	65	15.05	21.82
chr2	133691257	133694883	6.5	6.94	5.87	1.07	0.0272	0.279	86.22	159	76.03	41.02
chr19	25291623	25293277	5.07	5.53	4.38	1.15	0.0272	1	45.38	47	20.59	20.94
chr2	84509899	84512426	5.14	5.62	4.4	1.22	0.0273	1	41.6	57	13.46	28.8
chr4	43454969	43456506	4.74	5.25	3.93	1.32	0.0274	1	43.11	33	17.42	13.09
chr15	76716271	76717985	5.41	5.86	4.74	1.12	0.0274	1	49.16	67	31.68	21.82
chr5	32164809	32165927	4.59	5.19	3.55	1.64	0.0274	1	21.93	51	18.22	5.24
chr5	74555639	74557329	5.56	6.01	4.92	1.09	0.0275	1	50.68	78	31.68	28.8
chr1	82521938	82523637	4.54	5.13	3.52	1.61	0.0275	1	18.91	51	15.05	7.85
chr16	33836286	33837480	5.25	5.78	4.41	1.38	0.0275	1	27.99	82	29.3	13.09
chr6	143314272	143316821	6.1	6.54	5.45	1.09	0.0275	1	64.29	122	34.06	53.23
chr6	65534321	65536048	5.01	5.49	4.27	1.22	0.0275	1	55.97	34	15.84	22.69
chr2	158239382	158243756	7.14	7.54	6.6	0.94	0.0276	0.281	128.58	243	117.22	76.8
chr4	148423496	148424146	5.32	5.86	4.42	1.44	0.0276	1	20.42	96	23.76	19.2
chr1	145383689	145385140	5.12	5.67	4.22	1.45	0.0276	1	18.91	83	19.8	17.45
chr16	45124030	45125983	5.61	6.07	4.94	1.13	0.0276	1	76.39	58	41.18	20.07
chr1	65435798	65437863	5.45	5.92	4.75	1.17	0.0276	1	48.41	73	35.64	18.33
chr19	33227979	33229998	5.08	5.55	4.39	1.16	0.0276	1	48.41	45	17.42	24.44
chr17	51062706	51064170	4.67	5.19	3.86	1.33	0.0276	1	37.06	36	14.26	14.84
chr8	120917152	120919515	5.77	6.2	5.17	1.03	0.0276	1	69.58	77	30.89	41.02
chr13	20397615	20398670	5.2	5.65	4.54	1.11	0.0277	1	47.65	53	22.97	23.56
chr7	137899532	137900622	4.64	5.21	3.7	1.5	0.0277	1	24.96	49	18.22	7.85
chr14	102251533	102253830	5.92	6.36	5.29	1.07	0.0277	1	59.75	104	37.22	41.02
chr5	110876521	110878014	5.14	4.44	5.6	-1.16	0.0277	1	17.4	26	57.02	40.14
chr17	26144158	26146985	5.59	6.03	4.97	1.05	0.0277	1	64.29	66	26.14	36.65
chr13	115523746	115526921	6.46	6.92	5.8	1.12	0.0277	0.283	72.61	169	70.49	41.02
chr5	139565208	139566647	5.03	5.58	4.16	1.42	0.0278	1	20.42	75	18.22	17.45
chr5	64977513	64980374	5.83	6.26	5.23	1.03	0.0278	1	70.34	83	43.56	31.42
chr16	22261017	22262704	4.6	5.15	3.71	1.44	0.0278	1	31.01	40	17.42	8.73
chr17	72688272	72689120	4.32	4.98	3.05	1.93	0.0279	1	8.32	55	8.71	7.85
chr2	30319357	30321219	5.59	6.01	4.98	1.04	0.0279	1	67.32	62	33.26	29.67
chr3	131464539	131468813	7.37	7.72	6.93	0.79	0.0279	0.283	184.55	236	140.18	102.98
chr4	110740322	110742473	4.7	3.86	5.23	-1.37	0.0279	1	9.08	20	35.64	39.27
chr19	31785104	31789176	6.28	6.68	5.73	0.95	0.0279	0.283	114.97	90	57.82	48
chr9	75254635	75258260	6.39	6.79	5.84	0.95	0.0279	0.283	90.76	131	56.23	58.47
chr1	164703376	164704706	5.07	5.57	4.3	1.26	0.0279	1	31.77	63	23.76	15.71
chr11	78174607	78178292	6.55	6.96	5.98	0.98	0.028	0.283	139.93	109	81.58	44.51
chr12	79376576	79379659	5.79	6.25	5.13	1.12	0.028	1	52.94	99	41.18	28.8
chr7	94478725	94480536	5.46	5.94	4.75	1.19	0.028	1	59.75	63	38.81	14.84
chr5	20207384	20209080	4.8	5.33	3.96	1.37	0.028	1	29.5	51	20.59	10.47
chr11	80230171	80235601	6.67	7.06	6.14	0.92	0.028	0.283	161.1	105	64.15	76.8
chr11	72522969	72525231	5.03	4.29	5.52	-1.22	0.0281	1	24.2	15	53.06	38.4
chr19	28085461	28092167	7.31	7.65	6.88	0.76	0.0281	0.284	222.37	178	119.59	116.07
chr5	64569450	64572019	4.98	5.48	4.21	1.27	0.0281	1	58.24	31	22.97	13.96
chr1	23083903	23086465	4.98	4.26	5.45	-1.19	0.0281	1	17.4	21	38.81	48.87
chr18	25630990	25632916	4.83	4.05	5.33	-1.28	0.0282	1	18.15	15	34.06	46.25
chr3	31597103	31599022	4.48	3.53	5.04	-1.51	0.0282	1	15.13	8	37.22	28.8
chr3	155537419	155540102	5.87	6.32	5.21	1.1	0.0282	1	53.7	106	33.26	41.02
chr2	19637699	19639532	5.57	6.01	4.93	1.07	0.0283	1	53.7	75	34.06	27.05
chr19	23684783	23686693	5.08	5.57	4.33	1.25	0.0283	1	61.26	34	26.14	13.96
chr6	134563724	134566260	6.62	7.08	5.93	1.15	0.0283	0.285	64.29	206	54.65	67.2
chr15	99213022	99214349	5.81	6.55	4.25	2.29	0.0283	1	31.77	155	19.8	18.33
chr19	14758677	14761931	7	7.39	6.45	0.95	0.0283	0.285	111.18	225	95.83	78.54
chr3	116021574	116023460	4.87	4.09	5.37	-1.27	0.0284	1	21.18	13	45.14	37.53
chr1	161525461	161526641	5.64	6.14	4.85	1.3	0.0284	1	32.52	109	34.06	23.56
chr5	103721058	103723363	4.64	3.79	5.17	-1.38	0.0285	1	16.64	11	38.81	33.16
chr8	30856830	30858829	4.52	3.58	5.08	-1.51	0.0285	1	12.86	11	45.94	21.82
chr1	58818093	58820044	5.56	6.03	4.85	1.18	0.0286	1	40.09	91	32.47	25.31
chr1	56953043	56955316	5.12	5.64	4.3	1.34	0.0286	1	26.47	73	24.55	14.84
chr17	63434234	63436892	5.21	5.68	4.49	1.19	0.0286	1	35.55	67	20.59	24.44
chr5	3782050	3783806	4.76	5.28	3.96	1.32	0.0286	1	32.52	45	11.88	19.2
chr19	32591590	32593309	4.99	5.46	4.28	1.19	0.0286	1	46.14	42	22.18	16.58
chr14	106061241	106062873	4.99	5.48	4.25	1.23	0.0286	1	34.04	55	21.38	16.58
chr6	138017791	138020500	5.22	4.49	5.7	-1.21	0.0286	1	12.86	32	43.56	60.22
chr11	94182239	94185719	5.94	6.36	5.34	1.01	0.0286	1	68.83	95	43.56	37.53
chr19	15368635	15372390	6.64	7.02	6.13	0.88	0.0287	0.288	136.9	122	78.41	61.96
chr1	65291237	65294142	6.08	6.54	5.4	1.14	0.0287	1	60.51	125	29.3	54.98
chr5	20433807	20437855	6.46	6.85	5.94	0.91	0.0287	0.288	104.38	126	62.57	60.22
chr6	147707791	147711050	6.01	6.51	5.23	1.28	0.0287	1	41.6	141	26.14	48.87
chr17	32874187	32876894	6.03	6.48	5.36	1.12	0.0287	1	53.7	125	41.18	41.02
chr11	93799949	93801364	4.58	5.11	3.74	1.37	0.0288	1	37.06	32	12.67	13.96
chr2	44781644	44783662	5.76	6.22	5.1	1.12	0.0288	1	50.68	98	39.6	28.8
chr18	78880906	78882800	4.46	3.46	5.04	-1.58	0.0288	1	6.05	16	22.97	42.76
chr13	42643169	42645243	5.17	5.64	4.47	1.17	0.0288	1	40.84	59	26.93	17.45
chr2	101460052	101462107	4.27	3.14	4.9	-1.76	0.0288	1	13.61	4	22.18	37.53
chr17	22400150	22402246	4.64	5.16	3.81	1.35	0.0288	1	38.57	33	15.84	12.22
chr2	50104538	50105862	5.64	6.16	4.81	1.35	0.0288	1	34.04	109	39.6	16.58
chr13	30200608	30202486	6.16	6.63	5.46	1.17	0.0289	1	52.94	145	50.69	37.53
chr8	129073711	129076245	6.31	6.72	5.73	1	0.0289	0.289	79.42	132	47.52	58.47
chr2	16850207	16851878	5.29	5.82	4.43	1.39	0.0289	1	21.93	91	21.38	21.82
chr14	77185782	77188080	6.07	6.49	5.47	1.02	0.0289	1	68.83	111	44.35	44.51
chr8	37465508	37467658	4.76	5.26	3.98	1.28	0.029	1	35.55	41	16.63	14.84
chr12	31741066	31742527	5.36	4.7	5.81	-1.12	0.029	1	21.93	30	68.9	43.63
chr8	59907336	59908523	4.87	5.38	4.06	1.33	0.029	1	26.47	57	15.84	17.45
chrX	161370925	161372556	4.09	4.77	2.74	2.03	0.029	1	47.65	7	5.54	7.85
chr12	35784680	35786768	4.89	4.17	5.37	-1.21	0.029	1	15.88	20	41.98	41.02
chr1	162459407	162463471	6.24	6.63	5.69	0.95	0.029	0.29	87.74	111	51.48	51.49
chr1	165219418	165221222	4.7	5.23	3.87	1.36	0.029	1	27.99	47	12.67	16.58
chr11	3732115	3733135	5.05	5.62	4.1	1.52	0.0291	1	17.4	81	22.97	11.35
chr2	145673661	145675615	5	5.5	4.23	1.28	0.0291	1	37.82	53	26.14	11.35
chr1	7387097	7388731	5.78	6.24	5.1	1.14	0.0291	1	49.16	102	27.72	41.02
chr6	138711599	138713941	4.86	4.11	5.35	-1.24	0.0292	1	13.61	21	38.81	42.76
chr3	30917658	30919434	5.25	5.69	4.6	1.09	0.0292	1	54.46	49	21.38	27.05
chr18	79304775	79308281	5.21	4.5	5.68	-1.19	0.0292	1	18.15	27	35.64	67.2
chr3	104344483	104345651	5.08	5.54	4.4	1.14	0.0292	1	42.36	51	22.18	20.07
chr4	116344775	116346907	6.49	6.93	5.85	1.08	0.0292	0.291	68.83	175	53.06	61.96
chr3	93059453	93061618	4.97	4.24	5.45	-1.22	0.0292	1	22.69	15	48.31	39.27
chr6	121344821	121347255	4.87	4.1	5.37	-1.26	0.0292	1	11.35	23	38.81	43.63
chr1	167937586	167940170	6.4	6.86	5.72	1.14	0.0292	0.291	59	173	54.65	50.62
chr12	71821085	71822993	6.09	6.5	5.52	0.98	0.0292	1	82.44	98	51.48	40.14
chr4	122667367	122668674	4.44	5.03	3.43	1.6	0.0292	1	18.15	47	11.09	10.47
chr13	89849233	89850709	4.87	5.43	3.93	1.51	0.0293	1	17.4	69	18.22	12.22
chr17	73184629	73189406	7.37	7.73	6.9	0.83	0.0293	0.291	155.05	269	121.97	116.94
chr18	57433798	57435664	4.19	3.07	4.81	-1.74	0.0294	1	6.81	10	40.39	15.71
chr13	102959234	102961397	3.79	2.5	4.46	-1.96	0.0294	1	5.29	6	13.46	30.54
chr4	132909169	132910248	5.31	5.76	4.64	1.13	0.0294	1	41.6	67	26.14	23.56
chr5	94678762	94682569	2.13	2.98	-0.26	3.25	0.0294	1	6.81	9	0.79	0.87
chrX	30984034	30987676	2.13	2.98	-0.26	3.25	0.0294	1	6.81	9	0.79	0.87
chr3	107477854	107479503	4.7	3.89	5.21	-1.32	0.0294	1	16.64	13	34.06	40.14
chr15	33835886	33839518	6.72	7.14	6.13	1.01	0.0294	0.292	139.93	142	99	41.02
chr3	68480260	68481633	5.02	5.5	4.28	1.22	0.0295	1	41.6	49	12.67	26.18
chrX	151558725	151561594	4.38	4.97	3.38	1.59	0.0295	1	44.63	18	10.3	10.47
chr2	78252483	78253883	4.71	5.25	3.85	1.4	0.0295	1	24.96	51	16.63	12.22
chr12	66213755	66215895	4.52	5.07	3.64	1.42	0.0295	1	27.99	39	11.88	13.09
chr6	142501676	142503434	4.27	3.25	4.86	-1.6	0.0295	1	9.08	10	22.18	35.78
chr19	58444164	58447190	5.56	6.04	4.82	1.23	0.0296	1	68.83	63	12.67	43.63
chr1	96691988	96693266	4.36	5.02	3.09	1.93	0.0296	1	9.83	55	3.96	13.09
chr2	16830763	16832087	4.56	5.19	3.4	1.79	0.0297	1	12.1	61	15.84	5.24
chr18	21438199	21440496	4.67	3.77	5.22	-1.45	0.0297	1	11.35	16	21.38	53.23
chrX	100561217	100562637	5.2	5.73	4.36	1.37	0.0298	1	61.26	45	34.06	6.98
chr2	62171708	62172793	4.47	5.08	3.38	1.7	0.0298	1	12.86	55	9.5	11.35
chr12	74856072	74858446	5.19	4.52	5.65	-1.13	0.0298	1	18.91	27	41.98	58.47
chr3	120731562	120733913	4.52	3.59	5.08	-1.49	0.0299	1	9.08	15	22.97	44.51
chr11	120214840	120216456	5.6	6.02	4.99	1.03	0.0299	1	65.8	64	34.85	28.8
chr2	157000928	157002330	4.32	3.34	4.89	-1.55	0.0299	1	8.32	12	34.06	25.31
chr17	5116733	5118770	5.02	5.49	4.31	1.17	0.0299	1	38.57	51	20.59	19.2
chr2	52813030	52815625	6.13	6.54	5.57	0.97	0.0299	1	93.03	93	38.02	56.73
chr9	15612317	15614367	3.61	2.29	4.28	-1.99	0.03	1	3.78	6	20.59	18.33
chr3	109075431	109077537	6.03	6.45	5.44	1.02	0.03	1	82.44	93	31.68	54.98
chrX	165582311	165584518	4.6	5.19	3.6	1.58	0.03	1	52.94	20	18.22	6.11
chr17	77060037	77062239	4.83	5.32	4.09	1.23	0.03	1	37.06	43	16.63	17.45
chr2	146667329	146668870	4.56	3.71	5.1	-1.39	0.03	1	12.1	14	39.6	28.8
chr8	46619657	46627221	7.06	7.44	6.53	0.91	0.0301	0.297	120.26	227	102.17	82.91
chr8	70605194	70606517	4.74	5.28	3.87	1.41	0.0301	1	31.77	46	21.38	7.85
chr14	106191145	106193070	5.05	5.55	4.27	1.28	0.0301	1	28.74	65	15.05	23.56
chr2	6299372	6302964	6.95	7.35	6.41	0.94	0.0301	0.297	116.48	209	102.17	68.07
chr14	115436222	115437563	5.25	5.76	4.46	1.29	0.0301	1	31.01	77	29.3	14.84
chr18	48808737	48810336	3.82	2.5	4.5	-2	0.0301	1	5.29	6	11.09	34.04
chr18	20773401	20787622	4.68	3.75	5.24	-1.5	0.0301	1	9.83	17	19.01	56.73
chr12	57350692	57353482	6.49	6.88	5.95	0.93	0.0301	0.297	96.06	139	56.23	67.2
chr2	26519832	26523108	5.82	6.28	5.15	1.13	0.0302	1	60.51	95	48.31	22.69
chr9	69288739	69292262	6.74	7.13	6.22	0.91	0.0302	0.297	112.7	167	85.54	63.71
chr19	32911940	32916216	6.88	7.25	6.36	0.89	0.0302	0.297	120.26	185	70.49	94.25
chr18	64732180	64733611	4.27	3.27	4.85	-1.58	0.0302	1	8.32	11	23.76	34.04
chr8	25663962	25666422	5.65	6.07	5.04	1.02	0.0302	1	67.32	67	37.22	28.8
chr2	140615709	140617912	6.34	6.77	5.72	1.05	0.0303	0.297	87.74	131	71.28	34.04
chr11	20993341	20996091	5.28	5.74	4.62	1.12	0.0303	1	53.7	53	30.89	18.33
chr8	70067036	70069110	4.96	5.43	4.25	1.18	0.0303	1	39.33	47	19.8	18.33
chr15	37174061	37175592	4.87	5.39	4.06	1.33	0.0304	1	24.96	59	15.84	17.45
chr11	46454874	46456872	4.44	4.99	3.53	1.46	0.0304	1	35.55	28	12.67	10.47
chr9	36534288	36535748	5.45	5.9	4.79	1.11	0.0304	1	44.63	75	30.89	24.44
chr5	86491990	86496650	6.71	7.1	6.16	0.94	0.0304	0.298	111.94	163	53.06	89.89
chr19	21852431	21859648	7.69	8.02	7.27	0.76	0.0305	0.298	206.49	313	174.24	133.52
chr11	106344240	106354666	7.99	8.3	7.6	0.7	0.0305	0.298	292.71	338	236.81	151.85
chr10	61847197	61850243	4.63	3.79	5.15	-1.37	0.0305	1	16.64	11	37.22	34.04
chr17	61878296	61879813	5.28	5.76	4.55	1.21	0.0305	1	32.52	76	20.59	26.18
chrX	9315381	9316976	4.37	4.96	3.35	1.61	0.0305	1	40.09	22	14.26	6.11
chr4	80566536	80568447	5.4	5.92	4.59	1.33	0.0306	1	31.77	89	34.06	13.96
chr8	40937930	40941553	7.18	7.87	5.81	2.06	0.0306	0.298	95.3	373	68.9	43.63
chr11	56153068	56156269	6.43	6.85	5.85	1	0.0306	0.298	101.35	129	76.03	39.27
chr16	17732949	17734601	5.98	6.49	5.19	1.3	0.0307	1	49.16	130	54.65	18.33
chr4	30756095	30757001	4.56	5.15	3.55	1.59	0.0307	1	15.88	55	9.5	13.96
chr4	20016249	20017771	4.52	5.13	3.44	1.7	0.0307	1	12.1	58	10.3	11.35
chrX	72381708	72383301	5.46	5.91	4.78	1.13	0.0307	1	44.63	76	33.26	21.82
chr12	9244243	9245677	4.24	3.16	4.85	-1.69	0.0307	1	12.86	5	23.76	34.04
chr2	117423435	117425482	5.34	5.83	4.59	1.24	0.0308	1	37.82	76	33.26	14.84
chr2	13650960	13652517	4.47	5.02	3.58	1.45	0.0308	1	37.06	28	14.26	9.6
chr9	56206391	56208061	4.83	5.34	4.03	1.31	0.0309	1	27.99	53	13.46	19.2
chr19	32282852	32288807	6.99	7.34	6.54	0.8	0.0309	0.3	170.18	153	91.08	95.12
chr3	121287314	121288912	6.12	6.52	5.56	0.96	0.0309	1	80.93	103	51.48	42.76
chr13	118696362	118697730	4.81	5.36	3.92	1.44	0.0309	1	21.18	61	19.01	11.35
chr17	88014370	88015951	4.82	5.31	4.06	1.26	0.0309	1	32.52	47	15.84	17.45
chr2	145668179	145671257	6.39	6.78	5.86	0.92	0.0309	0.3	102.86	117	65.74	50.62
chr18	48719442	48721289	4.07	2.84	4.73	-1.89	0.031	1	8.32	6	11.88	41.02
chr19	22588538	22590908	5.55	5.98	4.94	1.04	0.031	1	71.85	54	32.47	28.8
chr18	20432864	20434948	4.24	3.24	4.83	-1.6	0.031	1	9.83	9	22.97	34.04
chr17	22383937	22386285	4.6	5.13	3.76	1.37	0.031	1	37.06	33	16.63	10.47
chr14	70009786	70012104	6.22	6.68	5.55	1.12	0.031	0.3	66.56	138	62.57	31.42
chr10	26573885	26575741	6.35	6.85	5.58	1.26	0.0311	0.3	43.11	187	51.48	44.51
chr6	127677500	127679994	5.29	4.6	5.75	-1.15	0.0311	1	17.4	31	40.39	67.2
chr8	41005829	41008226	5.89	6.32	5.25	1.08	0.0311	1	67.32	93	49.9	26.18
chr3	33837524	33838997	2.42	0.33	3.24	-2.91	0.0311	1	1.51	1	11.09	7.85
chr2	6270378	6272913	5.79	6.2	5.21	0.99	0.0312	1	73.37	74	34.06	40.14
chr2	66108972	66111061	4.95	5.42	4.25	1.17	0.0312	1	44.63	41	19.8	18.33
chr18	54061409	54064544	5.84	6.28	5.21	1.06	0.0312	1	55.97	99	33.26	41.02
chr3	34321478	34324033	4.88	5.36	4.16	1.2	0.0312	1	43.11	39	16.63	19.2
chr18	45122093	45124714	4.68	3.75	5.24	-1.49	0.0313	1	15.88	11	19.01	56.73
chr11	105683347	105686944	6.76	7.12	6.28	0.84	0.0313	0.302	133.12	145	81.58	74.18
chr9	118072308	118074497	4.83	4.08	5.32	-1.24	0.0313	1	18.91	15	37.22	42.76
chr1	140500759	140501745	4.47	5.05	3.49	1.56	0.0313	1	18.15	48	11.09	11.35
chr17	71512196	71516919	6.85	7.25	6.3	0.95	0.0313	0.302	100.6	204	71.28	86.4
chr19	22974701	22976475	5.02	5.49	4.31	1.18	0.0314	1	55.97	34	21.38	18.33
chr9	41758383	41759684	4.77	5.28	3.98	1.3	0.0314	1	28.74	49	15.84	15.71
chr9	64581777	64583022	4.6	5.18	3.62	1.55	0.0314	1	17.4	55	15.05	9.6
chr6	79987647	79990040	4.65	3.83	5.17	-1.35	0.0314	1	11.35	17	29.3	42.76
chr10	95800499	95802228	5.82	6.3	5.09	1.21	0.0314	1	38.57	119	34.85	33.16
chr7	116744536	116746652	5.5	5.98	4.75	1.23	0.0314	1	32.52	94	26.93	27.05
chr2	60526957	60528275	5.5	5.97	4.81	1.16	0.0314	1	40.09	85	32.47	23.56
chr2	80700077	80701845	4.66	5.17	3.85	1.32	0.0314	1	40.09	32	15.84	13.09
chr10	119383172	119384919	4.43	3.5	4.99	-1.49	0.0314	1	13.61	9	26.93	36.65
chr17	50683651	50685413	5.68	6.18	4.91	1.27	0.0314	1	31.77	113	27.72	32.29
chr3	131892812	131894712	4.68	3.84	5.21	-1.37	0.0314	1	16.64	12	26.93	47.13
chr19	54695243	54697386	5.3	5.74	4.65	1.09	0.0314	1	55.97	51	19.8	30.54
chr2	56972092	56974377	5.31	5.75	4.69	1.06	0.0314	1	50.68	57	25.34	26.18
chr7	107754138	107756134	5.08	5.53	4.4	1.13	0.0314	1	41.6	51	22.18	20.07
chr14	105996295	105997665	4.34	4.93	3.3	1.63	0.0315	1	18.15	43	11.88	7.85
chrX	162604821	162606429	4.41	4.99	3.4	1.59	0.0315	1	41.6	22	15.05	6.11
chr18	76804216	76805664	4.07	2.89	4.71	-1.82	0.0315	1	9.83	5	15.84	36.65
chr6	119344939	119347286	6.59	7.05	5.91	1.15	0.0315	0.303	70.34	195	39.6	80.29
chr11	38494204	38496635	4.69	5.2	3.9	1.3	0.0316	1	32.52	41	15.05	14.84
chr17	71085697	71092183	8.11	8.44	7.68	0.76	0.0316	0.303	230.69	465	221.76	188.5
chr17	63203265	63205696	4.98	5.44	4.29	1.15	0.0316	1	43.87	43	19.01	20.07
chr2	122607719	122610569	6.01	6.42	5.42	1.01	0.0316	1	66.56	105	43.56	41.89
chr1	153461922	153464875	6.02	6.47	5.38	1.09	0.0316	1	58.24	119	32.47	50.62
chr18	53561871	53563833	4.55	3.68	5.09	-1.41	0.0316	1	10.59	15	26.14	41.89
chr18	79580359	79582375	4.54	3.64	5.1	-1.46	0.0317	1	12.86	12	22.18	46.25
chr10	68648132	68649739	5.9	6.38	5.17	1.21	0.0317	1	41.6	125	29.3	42.76
chr17	16473993	16479027	6.97	7.4	6.34	1.07	0.0317	0.304	81.69	257	82.37	79.42
chr12	35948223	35950109	4.9	4.11	5.4	-1.3	0.0317	1	23.45	11	34.85	49.74
chr8	26580091	26581980	4.98	5.47	4.23	1.24	0.0317	1	37.82	51	25.34	12.22
chr5	17196308	17198179	5.54	6.03	4.8	1.22	0.0317	1	35.55	95	34.06	21.82
chr15	102400763	102404754	6.69	7.08	6.15	0.93	0.0317	0.304	97.57	173	69.7	72.43
chr11	106341305	106343036	5.8	6.23	5.19	1.04	0.0318	1	64.29	86	44.35	28.8
chr18	25167225	25169513	4.59	3.73	5.12	-1.39	0.0318	1	13.61	13	26.14	43.63
chr6	3250419	3252215	3.05	3.8	1.37	2.44	0.0318	1	15.88	12	0.79	4.36
chr7	57017307	57019176	5.77	6.18	5.19	0.99	0.0318	1	77.9	67	37.22	35.78
chr12	72068940	72072363	6.15	6.55	5.6	0.95	0.0319	1	82.44	105	43.56	53.23
chr8	108527999	108532628	7.08	7.42	6.64	0.79	0.0319	0.304	162.62	181	108.5	90.76
chr19	20418771	20420425	5.32	5.75	4.69	1.06	0.0319	1	50.68	57	24.55	27.05
chr2	14770441	14772577	4.94	5.45	4.16	1.29	0.0319	1	36.31	51	25.34	10.47
chr5	81703178	81711411	8.07	8.66	7.05	1.61	0.0319	0.304	217.07	591	161.57	102.98
chr1	101803660	101805402	4.59	5.12	3.73	1.39	0.0319	1	26.47	43	13.46	13.09
chr18	68212246	68213326	4.57	5.11	3.67	1.44	0.0319	1	24.2	45	15.05	10.47
chr15	64015179	64017547	5.89	6.36	5.19	1.16	0.032	1	43.87	120	35.64	37.53
chr1	43184262	43185528	4.94	4.23	5.41	-1.18	0.032	1	16.64	21	38.02	47.13
chr17	95024732	95026700	4.61	5.16	3.72	1.44	0.032	1	29.5	42	7.13	19.2
chr3	153905146	153907691	5.32	4.69	5.77	-1.08	0.032	1	23.45	28	45.14	63.71
chr5	33273253	33274611	5.35	5.79	4.72	1.07	0.032	1	50.68	60	29.3	23.56
chr8	25677191	25681171	6.61	7.01	6.04	0.98	0.032	0.305	89.25	169	55.44	75.92
chr2	165793507	165794663	4.87	5.37	4.08	1.3	0.032	1	27.99	55	19.8	13.96
chr6	136655757	136657968	5.37	4.73	5.81	-1.09	0.0321	1	18.91	34	53.06	59.34
chr19	24573015	24574760	5.18	5.62	4.54	1.09	0.0321	1	47.65	51	23.76	22.69
chr17	63132015	63134131	5.79	6.27	5.06	1.21	0.0321	1	37.82	117	30.1	36.65
chr3	29999658	30002179	6.56	6.98	5.97	1.01	0.0321	0.305	80.17	173	70.49	54.98
chr1	158991084	158993961	6.15	6.56	5.59	0.97	0.0321	1	85.47	103	38.81	57.6
chr19	41920839	41925608	7.8	8.11	7.42	0.69	0.0321	0.305	298.76	253	197.21	144.87
chr3	104092554	104093632	5.4	5.83	4.78	1.06	0.0321	1	49.16	65	27.72	27.05
chr14	75444403	75445697	4.58	5.12	3.69	1.44	0.0321	1	22.69	47	12.67	13.09
chr4	89111055	89113930	5.5	6.01	4.72	1.29	0.0322	1	27.99	101	22.97	29.67
chr1	43224544	43227528	6.46	6.88	5.88	1	0.0322	0.306	77.9	157	60.98	56.73
chr8	83379711	83382616	5.89	6.36	5.19	1.17	0.0323	1	43.11	121	38.02	34.91
chr5	93202424	93204174	5.11	5.58	4.42	1.16	0.0323	1	38.57	57	16.63	26.18
chrX	45265149	45267413	4.77	5.28	3.97	1.31	0.0323	1	50.68	27	18.22	13.09
chr5	99669868	99672634	6.86	7.26	6.31	0.95	0.0323	0.306	99.08	207	76.82	82.03
chr1	81667247	81669775	5.83	6.27	5.19	1.08	0.0323	1	51.43	103	36.43	36.65
chr19	25877235	25879121	4.87	5.35	4.15	1.2	0.0324	1	44.63	37	19.01	16.58
chr10	32995259	32997650	4.54	3.67	5.08	-1.41	0.0324	1	14.37	11	40.39	27.05
chr19	32830173	32841294	7.93	8.21	7.58	0.63	0.0324	0.306	300.27	293	204.33	178.03
chr4	81555826	81558214	5.16	5.67	4.37	1.31	0.0324	1	24.96	77	23.76	17.45
chr8	82158789	82164224	7.39	7.73	6.95	0.78	0.0325	0.306	173.96	251	139.39	108.21
chr4	65759601	65761179	4.65	5.21	3.7	1.51	0.0325	1	21.18	53	18.22	7.85
[truncated: 62,901 more rows]
