# Supplementary material for: Smarca4 Inactivation Promotes Lineage-Specific Transformation and Early Metastatic Features in the Lung
Source: Oxford University Press journal article supplement (doi:10.1158/2159-8290.cd-21-0248), 2021-09-24
Supplement: 21598290cd210248-sup-261127_2_supp_7390480_qzc0bx.xlsx [file 21598290cd210248-sup-261127_2_supp_7390480_qzc0bx.xlsx]

## Sheet: RNAseq_UQ_norm_counts
Gene	KO_23	KO_M	WT_36	WT_T2
0610005C13Rik	2.45953	2.22978	0.989741	2.37812
0610007C21Rik	335.316	412.509	166.277	281.023
0610007L01Rik	1847.09	1532.32	2766.39	1843.04
0610007N19Rik	2.45953	35.6765	0	13.0797
0610007P08Rik	531.259	1089.25	1196.6	392.39
0610007P14Rik	1063.34	852.924	631.455	908.442
0610007P22Rik	630.591	470.439	405.645	404.768
0610008F07Rik	4.91906	1.11489	1.97948	0
0610009B14Rik	0	0	0	0
0610009B22Rik	323.272	438.988	318.321	299.405
0610009D07Rik	1053.45	1137.52	1210.1	1222.66
0610009L18Rik	5.7389	14.4936	0	3.56718
0610009O20Rik	636.174	801.539	1141.23	560.048
0610010B08Rik	590.058	705.692	587.352	1083.52
0610010F05Rik	970.686	820.559	1205.5	714.625
0610010K14Rik	432.877	905.324	515.774	478.002
0610010O12Rik	1116	423.167	1928.02	506.564
0610011F06Rik	623.934	590.891	293.953	417.36
0610011L14Rik	535.358	595.351	495.86	749.108
0610012G03Rik	378.423	612.922	374.211	572.473
0610012H03Rik	0	0	0	0
0610030E20Rik	673.624	277.039	497.583	258.359
0610031J06Rik	2043.05	1721.39	1234.21	1110.58
0610031O16Rik	0	0	0	0
0610037L13Rik	254.151	246.391	216.753	218.787
0610037P05Rik	348.999	383.422	295.606	456.48
0610038B21Rik	15.3311	12.208	2.14774	5.07729
0610038L08Rik	0.828042	2.24093	1.97948	0
0610039K10Rik	6.55875	2.22978	0	1.18906
0610040B10Rik	3.27937	7.80423	5.93845	3.56718
0610040F04Rik	13.7488	4.45956	19.9532	8.75149
0610040J01Rik	0	113.719	0.989741	1.18906
0610043K17Rik	0	0	0	0
0910001L09Rik	351.672	541.836	362.245	455.41
100043387	8.82971	85.3225	36.6897	20.8323
1100001G20Rik	0.819843	0	0	4.75624
1110001A16Rik	424.638	244.551	201.957	356.885
1110001J03Rik	158.23	200.68	119.759	152.2
1110002B05Rik	801.807	946.82	935.306	816.849
1110002L01Rik	564.766	383.6	382.842	190.226
1110002N22Rik	213.159	215.185	161.328	224.732
1110003E01Rik	3353.98	1159.57	1602.56	882.283
1110004E09Rik	170.527	431.462	366.036	605.22
1110004F10Rik	1443.12	2203.02	2443.67	2518.45
1110005A03Rik	200.042	473.962	210.815	281.807
1110006O24Rik	24.5953	35.6765	19.7948	22.5922
1110007C09Rik	552.575	629.912	1166.01	466.112
1110008F13Rik	1620.86	2012.17	2472.24	2800.83
1110008J03Rik	199.222	182.842	129.656	120.095
1110008L16Rik	433.427	420.581	484.795	489.964
1110008P14Rik	241.854	325.548	232.589	293.698
1110012J17Rik	12384.2	6318.81	6178.14	4040.55
1110012L19Rik	356.632	191.761	93.0357	195.006
1110014N23Rik	900.188	1185.14	732.409	623.068
1110015O18Rik	0	0	0	0
1110017D15Rik	1.63969	0	0	0
1110017F19Rik	13.1175	11.1489	100.954	16.6468
1110018G07Rik	1193.69	1449.28	926.398	1013.08
1110018J18Rik	235.295	201.795	491.901	209.275
1110019D14Rik	88.5431	64.6636	43.5486	20.214
1110020A21Rik	8.19843	7.80423	0	9.51249
1110020G09Rik	1073.99	691.243	861.689	1409.04
1110021J02Rik	892.998	585.718	317.539	343.068
1110021L09Rik	592.558	326.127	349.735	456.445
1110028C15Rik	236.099	69.0117	299.803	83.7931
1110028F11Rik	2.45953	2.22978	0	1.18906
1110028F18Rik	0	1.4828	1.43512	2.34245
1110031I02Rik	282.969	632.142	116.097	258.312
1110032A03Rik	144.251	129.784	81.6932	47.503
1110032A04Rik	637.838	6.68934	337.502	2.37812
1110032F04Rik	1.63969	0	0	0
1110034A24Rik	373.422	771.28	680.863	877.907
1110034B05Rik	301.366	195.953	295.527	217.598
1110034G24Rik	56.5692	65.7785	17.8153	24.9703
1110035M17Rik	0.819843	2.22978	0	2.37812
1110036E04Rik	0	0	0	0
1110037F02Rik	2003.69	1867.42	1306.46	1939.36
1110038B12Rik	3208.96	1485.03	1577.59	1282.88
1110038D17Rik	357.452	257.539	345.42	274.673
1110038F14Rik	436.936	327.777	349.379	380.499
1110046J04Rik	301.456	96.1815	47.1513	20.7134
1110049F12Rik	311.541	440.381	241.497	430.63
1110050K14Rik	0.819843	0	0	0
1110051M20Rik	554.214	343.386	48.4973	60.6421
1110054M08Rik	63.2509	70.7955	25.7333	31.9263
1110054O05Rik	439.108	507.654	324.002	396.147
1110057K04Rik	1444.66	1731.46	1478.42	1146.36
1110058L19Rik	207.42	100.34	150.441	70.1546
1110059E24Rik	464.687	966.576	516.645	855.969
1110059G10Rik	168.888	186.187	163.307	151.011
1110059M19Rik	0	0	2.96922	2.37812
1110065P20Rik	223.547	280.161	91.9767	185.279
1110067D22Rik	1725.98	354.145	3081.82	1069.39
1190002F15Rik	186.924	284.297	128.666	136.742
1190002H23Rik	0.819843	30.102	0	1.18906
1190002N15Rik	305.802	666.704	313.748	32.1046
1190003J15Rik	0.819843	0	0	1.18906
1190003K10Rik	0	0	0	0
1190005F20Rik	960.857	622.365	1098.6	676.576
1190005I06Rik	65.5875	11.1489	33.6512	21.4031
1190007F08Rik	434.099	13.6351	14.8164	55.434
1190007I07Rik	213.799	212.041	136.832	184.946
1200009I06Rik	86.0836	42.3658	15.8359	205.696
1200011I18Rik	607.135	940.242	856.918	766.468
1200011M11Rik	801.807	1002.29	1077.83	938.169
1200014J11Rik	534.39	1047.55	1248.47	1259.22
1200016B10Rik	639.478	286.527	445.384	290.131
1300001I01Rik	2603.9	4378.69	4199.45	4488.53
1300002E11Rik	104.817	83.6056	60.681	89.1795
1300002K09Rik	0	0	0	0
1300010F03Rik	809.186	509.504	809.608	417.36
1300014I06Rik	695.235	583.098	557.224	432.818
1300015D01Rik	0.770653	0	0	0
1300017J02Rik	0	1.11489	0.989741	0
1300018I17Rik	445.191	333.352	187.061	277.051
1300018J18Rik	356.665	208.061	306.691	284.78
1500001M20Rik	577.17	430.347	808.619	717.004
1500002O10Rik	1.63969	0	0	0
1500002O20Rik	668.172	636.602	508.727	444.756
1500003O03Rik	9558.32	4329.12	5216.01	3414.98
1500004A13Rik	75.6716	81.1416	74.0722	100.88
1500009C09Rik	0	0	0	0
1500009L16Rik	0	0	0	0
1500010J02Rik	666.533	1411.45	899.794	1147.44
1500011B03Rik	96.3152	148.358	80.1789	99.2866
1500011H22Rik	596.862	731.501	705.072	753.829
1500011K16Rik	429.598	187.301	348.389	179.548
1500012F01Rik	2704.66	1189.59	612.561	939.417
1500012K07Rik	0	5.40721	2.60302	3.24614
1500015A07Rik	31.9739	43.4807	48.4973	47.5624
1500015L24Rik	0.819843	0	0	0
1500015O10Rik	0.819843	2.22978	0	0
1500016L03Rik	0	1.11489	0	0
1500017E21Rik	0	0	0	0
1500031L02Rik	140.193	183.957	121.738	234.245
1500032L24Rik	805.865	984.447	872.952	877.527
1520402A15Rik	58.2089	113.719	5.93845	40.3448
1600002D24Rik	0	0	0	0
1600002H07Rik	474.017	450.571	455.707	449.798
1600002K03Rik	57.389	81.3869	70.2716	78.478
1600010M07Rik	4.7141	2.22978	0	1.18906
1600012F09Rik	856.736	944.322	981.823	623.02
1600012H06Rik	727.488	985.094	734.111	721.486
1600014C10Rik	699.326	492.781	300.485	385.256
1600014C23Rik	0	1.11489	0	0
1600014K23Rik	0	0	0	0
1600015I10Rik	0	0	0	0
1600016N20Rik	87.7233	32.3318	57.405	46.3734
1600019K03Rik	0	0	0	0
1600020E01Rik	157.41	39.0211	58.3947	55.8859
1600021P15Rik	0	0	0	0
1600025M17Rik	0	0	0	0
1600027N09Rik	170.527	197.335	126.687	285.386
1600029D21Rik	2.05781	0	13.9059	1.18906
1600029I14Rik	0	0	0	0
1600029O15Rik	5.69791	0	13.124	4.31629
1700001C02Rik	0	0	0	0
1700001C19Rik	26.8335	6.68934	3.79071	2.37812
1700001D01Rik	0	0	0	0
1700001F09Rik	0	0	0	13.6147
1700001G11Rik	10.658	10.034	9.89741	10.7015
1700001G17Rik	3.27937	8.91911	5.93845	9.51249
1700001J03Rik	14.6342	1.11489	1.97948	0
1700001J11Rik	15.1261	23.5688	8.85818	5.50535
1700001K19Rik	0.819843	8.91911	0	3.56718
1700001K23Rik	0	0	0	0
1700001L05Rik	95.1018	31.2169	37.6102	27.3484
1700001L19Rik	13.9373	5.57445	2.96922	0
1700001O22Rik	4.91906	5.57445	0	0
1700001P01Rik	0	0	1.97948	2.37812
1700003C15Rik	0	0	0	0
1700003D09Rik	0	0	0	0
1700003E16Rik	20.4961	25.6425	2.96922	2.37812
1700003F12Rik	124.616	10.034	0	4.75624
1700003F17Rik	0	0.713529	0	0
1700003G13Rik	0	0	0	0
1700003G18Rik	0	0	0	1.18906
1700003H04Rik	0	0	0	0
1700003L19Rik	0	0	0	0
1700003M02Rik	0	0	0	1.18906
1700003M07Rik	12.1173	10.4242	16.885	12.937
1700003P14Rik	0	0	0	0
1700006A11Rik	0	0	0	0
1700006E09Rik	0	0	0	0
1700006F04Rik	0	0	0	0
1700006H21Rik	0	0	0	0
1700007B14Rik	0	0	0	0
1700007F19Rik	0.819843	0	0	0
1700007G11Rik	3.27937	2.22978	0	0
1700007I08Rik	6.55875	4.45956	0	0
1700007J10Rik	7.88689	13.0888	18.9634	21.0702
1700007K09Rik	0.819843	1.11489	0	1.18906
1700007K13Rik	0	0	0	0
1700007L15Rik	21.3159	20.068	15.8359	20.214
1700007P06Rik	6.55875	21.8964	2.96922	4.75624
1700008A04Rik	0	0	0	0
1700008F21Rik	5.7389	0	0	1.18906
1700008I05Rik	0.819843	0	0	8.32342
1700008J07Rik	38.5326	109.259	98.9741	153.389
1700008K24Rik	0	0	0	0
1700008O03Rik	0.819843	0	1.97948	1.18906
1700008P02Rik	0	0	0	0
1700008P20Rik	0	0	0	0
1700009C05Rik	0	0	0	0
1700009J07Rik	0	0	0	0
1700009N14Rik	0	0	0	0
1700009P17Rik	54.1097	37.9062	8.90767	3.56718
1700010B08Rik	1.64789	3.34467	6.8985	2.36623
1700010D01Rik	0	0	0	0
1700010I02Rik	3.78768	0	2.46446	6.33769
1700010I14Rik	10.658	0	0	0
1700010J16Rik	0	0	0	0
1700010K23Rik	0	0	0	0
1700010M22Rik	0	0	0	0
1700011A15Rik	0	0	0	0
1700011B04Rik	0	0	0	0
1700011E24Rik	0.819843	0	0	0
1700011F03Rik	0	0	0	0
1700011F14Rik	0	0	0	0
1700011H14Rik	0	0	0	1.18906
1700011I03Rik	1.63969	0	0	0
1700011J10Rik	87.1412	74.7199	42.2719	30.4756
1700011L22Rik	0	0	0	2.37812
1700011M02Rik	0	0	0	0
1700012A03Rik	0	0	0	0
1700012A16Rik	4.91906	7.80423	6.92819	8.32342
1700012B07Rik	0	1.11489	0	0
1700012B09Rik	0	1.11489	0	34.4828
1700012B15Rik	110.253	85.8353	48.4973	67.7765
1700012D01Rik	11.4778	7.80423	0.989741	3.56718
1700012D14Rik	0.819843	2.22978	0	0
1700012I11Rik	0	0	0	0
1700012L04Rik	3.27937	5.57445	0	3.56718
1700012P22Rik	0	0	0	0
1700013D24Rik	0	0	0	0
1700013F07Rik	11.4778	3.34467	0	1.18906
1700013G23Rik	2.45953	8.91911	3.95897	2.37812
1700013G24Rik	0	0	0	0
1700013H16Rik	0	0	0	0
1700013N18Rik	0.819843	0	0	0
1700014N06Rik	0	0	0	0
1700015E13Rik	1.63969	0	4.94871	0
1700015F17Rik	6.55875	0	0.989741	0
1700015G11Rik	0	0	0	0
1700016C15Rik	18.0366	0	20.7846	449.441
1700016D06Rik	13.2487	8.98601	10.3527	10.1546
1700016G22Rik	2.45953	1.11489	0.989741	1.18906
1700016H13Rik	0	0	0	0
1700016K19Rik	7.37859	0	1.97948	0
1700016L04Rik	1.63969	0	0	2.37812
1700016L21Rik	0	0	0	0
1700016M24Rik	0	0	0	0
1700016P04Rik	0	0	0	0
1700017B05Rik	846.923	779.308	1088.72	1254.46
1700017D01Rik	0	0	0	0
1700017G19Rik	0	0	0	0
1700017J07Rik	0	0	0	0
1700017N19Rik	0.819843	0	0	0
1700018A04Rik	19.6762	5.57445	20.7846	3.56718
1700018A14Rik	0	1.11489	0	0
1700018B08Rik	4.09922	5.57445	0	0
1700018B24Rik	0	0	0	0
1700018C11Rik	0	0	0	0
1700018F24Rik	0	0	0	1.18906
1700018G05Rik	0	0	0	0
1700018L02Rik	2.76287	12.8658	0	0
1700018L24Rik	2.45953	2.22978	0	0
1700019A02Rik	0.819843	0	0	0
1700019B03Rik	0.819843	2.22978	0.989741	0
1700019B21Rik	0	0	0	0
1700019D03Rik	0	0	0	0
1700019E08Rik	0	0	0	2.37812
1700019E19Rik	593.567	422.543	414.702	373.365
1700019G17Rik	155.77	8.91911	58.3947	33.2937
1700019G24Rik	0	0	0	0
1700019L03Rik	38.5982	25.0293	29.237	62.8537
1700019M22Rik	0	0	0	0
1700019N12Rik	0	0	0	1.18906
1700019N19Rik	0	0	0	0
1700019O17Rik	0.819843	0	0	0
1700020A23Rik	2.45953	0	0	0
1700020C07Rik	0.819843	0	0	0
1700020D05Rik	27.8747	17.8382	2.96922	2.37812
1700020G17Rik	0	0	0	0
1700020I14Rik	408.266	330.007	602.752	465.589
1700020L24Rik	305.006	47.9402	43.5486	21.4031
1700020M21Rik	0	0	0	1.18906
1700020N01Rik	0	0	0	0
1700020N15Rik	0	0	0	0
1700020N18Rik	0	0	0	0
1700020O03Rik	1183.78	848.408	306.82	501.784
1700021C14Rik	36.0731	45.7105	22.7641	24.9703
1700021F05Rik	398.444	260.884	280.126	391.201
1700021F07Rik	0	0	0	0
1700021K19Rik	850.998	944.311	910.562	881.094
1700021N21Rik	0	0	0	0
1700022A21Rik	0	0	0	0
1700022A22Rik	0	0	1.88051	0
1700022E09Rik	0	0	0	0
1700022H16Rik	0	0	0	0
1700022I11Rik	0	0	0	0
1700022P22Rik	3.27937	0	1.97948	0
1700023A16Rik	0	0	0	0
1700023C21Rik	0	0	0	0
1700023E05Rik	0	0	0	0
1700023F02Rik	0	0	0	0
1700023F06Rik	4.91906	1.11489	3.95897	3.56718
1700023L04Rik	2.45953	0	0.989741	0
1700024B18Rik	0	0	0	0
1700024F13Rik	41.812	24.5276	14.8461	20.214
1700024G13Rik	0	0	0	0
1700024P03Rik	0	0	0	1.18906
1700024P04Rik	0	0	0	0
1700024P16Rik	0	0	0	0
1700025B11Rik	0	0	0	0
1700025C18Rik	0	0	0	0
1700025E21Rik	4.09922	2.22978	0.989741	1.18906
1700025F22Rik	0	0	0	0
1700025F24Rik	0	1.11489	0	0
1700025G04Rik	40.9922	266.592	650.25	308.014
1700025K23Rik	13.1175	28.9871	13.8564	13.6266
1700025K24Rik	0	0	0	1.18906
1700025M24Rik	0	0	0	0
1700025N23Rik	39.0901	37.7725	28.2472	17.1819
1700026D08Rik	0.819843	0	0	0
1700026D11Rik	0	0	0	0
1700026F02Rik	0	2.22978	0	0
1700026J04Rik	1.63969	3.34467	1.158	0
1700026L06Rik	2.45953	17.8382	1.97948	45.1843
1700027A15Rik	0	0	0	0
1700027A23Rik	0	0	0	0
1700027D21Rik	20.4961	1.11489	0.989741	3.56718
1700027F09Rik	0	0	0	0
1700027H10Rik	0	0	0	1.18906
1700027I24Rik	0	0	0	0
1700027J07Rik	0	0	0	0
1700028B04Rik	0	0	0	0
1700028D13Rik	0.852637	0	0	0
1700028E10Rik	1.66428	3.34467	1.97948	0
1700028I16Rik	0.819843	0	0	2.37812
1700028J19Rik	0.819843	1.11489	12.8666	7.13436
1700028K03Rik	26.9319	24.3492	17.756	15.6718
1700028M03Rik	0	0	0	0
1700028P14Rik	1.63969	0	0	0
1700028P15Rik	0.819843	0	0	0
1700029B22Rik	0	0	0	0
1700029F09Rik	520.609	653.281	896.913	734.685
1700029F12Rik	1.00841	1.11489	1.97948	0
1700029G01Rik	163.149	10.034	7.91793	107.027
1700029H14Rik	0	1.11489	0	0
1700029I01Rik	24.9724	2.5531	17.2017	34.126
1700029I15Rik	1.63969	4.45956	0	1.18906
1700029J03Rik	0	0	0	0
1700029J07Rik	106.612	57.9965	7.91793	9.52438
1700029J11Rik	0.819843	1.11489	0.989741	0
1700029M20Rik	0	0	0	0
1700029N11Rik	0	0	0	0
1700029P11Rik	0	0	0	0
1700030A11Rik	0	0	0	0
1700030C10Rik	229.474	111.913	283.581	41.962
1700030F04Rik	0	0	0	0
1700030F18Rik	0	0	0	0
1700030J22Rik	44.2715	31.2169	3.95897	19.025
1700030K09Rik	386.712	259.758	197.285	230.606
1700030L20Rik	0	0	1.59348	1.60523
1700030M09Rik	0	0	0	0
1700030N03Rik	0	1.11489	0	0
1700030O20Rik	0	0	0	0
1700031A10Rik	0	0	0.989741	0
1700031F05Rik	0	0	0	0
1700031M16Rik	0	0	0	0
1700031P21Rik	0	0	0	0
1700034E13Rik	0	0	0	0
1700034F02Rik	4.09922	12.2638	3.95897	0
1700034G24Rik	0	0	0	0
1700034H14Rik	217.259	218.518	590.034	334.126
1700034H15Rik	7.49337	13.3898	5.58214	8.25208
1700034I23Rik	0.819843	2.22978	0	1.18906
1700034J05Rik	0	0	0	0
1700034K08Rik	0	0	1.97948	0
1700034O15Rik	0	0	0	0
1700034P13Rik	5.09943	4.5153	0	1.66468
1700036G14Rik	0	0	0.989741	0
1700037C18Rik	16.3969	35.6765	7.91793	30.9156
1700037H04Rik	956.757	2014.61	1261.86	1332.06
1700039E15Rik	0	0	0	0
1700039E22Rik	2.45953	1.11489	0.989741	0
1700040I03Rik	112.507	94.7656	150.352	107.812
1700040L02Rik	0	0	0	0
1700040N02Rik	0	1.11489	0.989741	0
1700041C23Rik	0	0	0	0
1700041M19Rik	0	0	0	0
1700042B14Rik	0	0	0	0
1700042G07Rik	0	0	0	0
1700042G15Rik	0	1.11489	0	0
1700042O10Rik	0	0	0.989741	0
1700044C05Rik	0.819843	1.11489	0	0
1700044K03Rik	0	0	0	0
1700045H11Rik	0	0	0	0
1700045I19Rik	0	0	0	0
1700046C09Rik	0	0	0	0
1700047G03Rik	0	0	0	0
1700047I17Rik2	1085.36	1043.15	1170.34	914.245
1700047L14Rik	0	0	0	0
1700047M11Rik	0	0	0	0
1700048M11Rik	0.819843	1.11489	0	0
1700048O20Rik	17.0609	14.7277	13.3318	38.0737
1700049E15Rik	0	0	0	0
1700049E22Rik	0	0	0	0
1700049G17Rik	155.205	139.551	116.166	66.9917
1700049L16Rik	0	0	0	0
1700051A21Rik	0	0	0	2.37812
1700052I22Rik	0	0	0	0
1700052K11Rik	28.7109	74.0621	45.7557	47.9548
1700052N19Rik	438.616	414.739	363.235	536.266
1700054A03Rik	0	0	0	0
1700054K19Rik	0	0	0	0
1700054M17Rik	0.819843	0	0	0
1700054N08Rik	79.1477	224.093	109.861	154.578
1700054O13Rik	0	1.11489	0	1.18906
1700055C04Rik	0	0	0	0
1700055N04Rik	0.893629	0	0	0
1700056E22Rik	24.5953	14.4936	38.5999	2.37812
1700057G04Rik	0	0	0	1.18906
1700057H15Rik	0	0	0	0
1700057K13Rik	3.27937	1.11489	0	0
1700058G18Rik	0	0	0	0
1700060C16Rik	0	0	0	0
1700060C20Rik	0	0	0	0
1700061F12Rik	0	0	0	0
1700061G19Rik	1.63969	1.11489	1.97948	4.75624
1700061I17Rik	0.819843	0	4.94871	2.37812
1700061J05Rik	0	0	0	0
1700063A18Rik	0	0	0	0
1700063D05Rik	87.7315	222.733	111.415	200.749
1700063O14Rik	0	0	0	0
1700064J06Rik	0	0	0	0
1700064M15Rik	0	0	0	0
1700065D16Rik	0	8.94141	3.4344	2.72295
1700065I16Rik	0	0	0	0
1700065I17Rik	0	0	0	0
1700065J11Rik	0	0	0	0
1700065J18Rik	0	0	0	0
1700065O20Rik	0	0	0	0
1700066B17Rik	0	0	0	0
1700066B19Rik	0	1.11489	19.8047	6.3258
1700066J24Rik	18.8564	12.2638	1.97948	1.18906
1700066M21Rik	227.097	280.952	341.461	302.033
1700066N21Rik	0	0	0	0
1700066O22Rik	0	0	0.989741	0
1700067G17Rik	0	0	0	0
1700067K01Rik	0.819843	3.34467	2.96922	2.37812
1700067P10Rik	1.63969	0	0	0
1700069L16Rik	0	0	0	0
1700069P05Rik	0	0	0	0
1700071K01Rik	0.819843	2.22978	0	0
1700071M16Rik	0	0	0	0
1700072B07Rik	0	0	0	0
1700072E05Rik	0	0	0	0
1700072O05Rik	0	0	0	0
1700073E17Rik	0.819843	0	2.03887	1.18906
1700074P13Rik	0	0	0	0
1700080E11Rik	0	0	0	0
1700080N15Rik	0	0	0	0
1700080O16Rik	0	0	0	0
1700081H04Rik	0	0	0	0
1700081H22Rik	0	0	0	0
1700081L11Rik	2039.89	1667.9	1554.09	1410.13
1700084C01Rik	1.63969	0	0	0
1700084E18Rik	16.3969	5.57445	0.989741	8.32342
1700084F23Rik	0	0	0	0
1700084J12Rik	0	0.479402	0	0
1700085B03Rik	0	0	0	0
1700085C21Rik	0	0	0	0
1700086L19Rik	0	0	0	0
1700086O06Rik	54.7	120.252	117.413	44.9227
1700088E04Rik	0	17.5818	1.86071	1.80737
1700090G07Rik	0	0	0	0
1700091E21Rik	0	0	0	0
1700092C02Rik	0	0	0	0
1700092C10Rik	0	0	0	0
1700092E19Rik	0	0	0	0
1700092K14Rik	0	0	0	0
1700092M07Rik	7.37859	8.91911	2.96922	11.8906
1700093K21Rik	4.09922	0	0.989741	0
1700094D03Rik	127.518	104.878	112.454	95.648
1700094J05Rik	0	0	0	0
1700094M24Rik	0	0	0	0
1700095A21Rik	0	0	0	0
1700095B10Rik	0	0	0	0
1700095B22Rik	0	0	0	0
1700096J18Rik	0	1.11489	0	0
1700096K18Rik	31.9575	24.7505	19.7948	11.0939
1700097N02Rik	0	0	0	0
1700100L14Rik	0	0	0	0
1700101E01Rik	4.09922	5.57445	0	16.6468
1700101I11Rik	0	0	0	0
1700101O22Rik	0	0	0	0
1700102H20Rik	3.27937	4.45956	6.92819	9.51249
1700102P08Rik	7.37859	11.1489	1.97948	1.18906
1700104A03Rik	0	3.34467	0	0
1700105P06Rik	0	3.34467	0	0
1700106J16Rik	0.819843	0	0	0
1700106N22Rik	177.086	89.1911	32.6615	79.6671
1700108F19Rik	0.819843	0	6.92819	7.13436
1700108J01Rik	0	0	0	0
1700108M19Rik	0	0	0	0
1700109F18Rik	0	0	0	0
1700109G14Rik	0.819843	0	0	0
1700109G15Rik	0	0	0	0
1700109H08Rik	19.6926	9.28703	10.1943	15.2438
1700109I08Rik	0	0	0	0
1700110C19Rik	0.819843	0	3.95897	0
1700110I01Rik	0.0491906	0	0	0
1700110K17Rik	5.49295	0	0.989741	0
1700110M21Rik	2.18898	1.11489	0.989741	1.18906
1700111N16Rik	3.1318	1.05914	0	3.56718
1700112E06Rik	0	5.57445	0	0
1700112H15Rik	6.55875	0	0	0
1700113A16Rik	95.9217	169.419	70.2716	76.1593
1700113H08Rik	0	0	0	0
1700113I22Rik	38.3113	26.3002	38.8078	24.9703
1700119H24Rik	0	0	0	0
1700120C14Rik	0.819843	3.35582	1.98938	1.18906
1700120E14Rik	0	0	0	0
1700120G07Rik	0	0	0	0
1700120K04Rik	11.4778	3.34467	0.989741	1.18906
1700121L16Rik	0	4.45956	0	1.18906
1700121N20Rik	0	0	0	0
1700122O11Rik	0	0	0	0
1700123I01Rik	0.819843	0	1.97948	0
1700123K08Rik	0	0	0	0
1700123L14Rik	0	0	0	0
1700123M08Rik	28.6945	16.7233	12.8666	7.13436
1700123O12Rik	2.45953	2.22978	3.95897	3.56718
1700123O20Rik	425.4	517.944	579.87	518.74
1700123O21Rik	0	0	0	0
1700125D06Rik	0	0	0	0
1700125G02Rik	0	0	0	0
1700125G22Rik	0	2.22978	0	0
1700125H03Rik	0	0	0	0
1700125H20Rik	0	0	0	0
1700126H18Rik	0	0	0	0
1700128A07Rik	0	0	0	0
1700128F08Rik	18.9056	17.4369	6.93809	15.6005
1700129C05Rik	0	0	0	0
1810006J02Rik	0	0	0.989741	0
1810006K21Rik	878.052	1648.75	945.243	1332.94
1810007C17Rik	1.63969	0	0	10.7015
1810007D17Rik	0	0	0	0
1810007I06Rik	2.01681	0	5.93845	0
1810008A18Rik	585.614	812.721	800.572	1161.53
1810008I18Rik	1.63969	0	8.90767	2.37812
1810009A15Rik	920.627	2107.14	1314.38	2520.81
1810009J06Rik	0	0	0	0
1810010D01Rik	4.09922	1.11489	0	0
1810010H24Rik	10.658	10.034	1.97948	1.18906
1810011H11Rik	0	0	0	0
1810011O10Rik	9.01828	5.57445	114.81	160.868
1810012K16Rik	0	0	0	0
1810012P15Rik	274.525	285.412	236.489	123.924
1810013A23Rik	0	0	0	0
1810013D10Rik	473.058	370.143	354.327	313.912
1810013L24Rik	887.595	1160.6	826.434	1193.84
1810014B01Rik	78.6476	133.82	79.7237	111.415
1810014F10Rik	18.8564	5.57445	27.7128	38.0499
1810018F18Rik	0	0	0	0
1810019D21Rik	189.007	141.056	148.036	227.467
1810019J16Rik	0.819843	0	0	2.37812
1810020D17Rik	145.112	137.131	89.0767	55.8859
1810020O05Rik	2.45953	0	0	29.7265
1810021B22Rik	19.6762	10.034	4.94871	2.37812
1810022K09Rik	732.12	704.51	973.658	524.376
1810024B03Rik	2.39394	2.22978	0	2.37812
1810026B05Rik	189.556	180.445	132.101	88.0618
1810026J23Rik	700.146	799.732	771.701	801.427
1810027O10Rik	358.272	333.575	289.994	248.526
1810029B16Rik	581.269	681.197	410.743	771.605
1810030J14Rik	0	0	0	0
1810030N24Rik	145.932	130.442	79.1793	54.6968
1810030O07Rik	847.161	770.076	662.563	725.505
1810031K17Rik	1010.05	857.417	922.439	546.98
1810032O08Rik	255.791	239.701	217.743	211.653
1810033B17Rik	1.63969	0	1.97948	0
1810034E14Rik	6.55875	12.2638	27.7128	2.37812
1810035I16Rik	5.86188	9.28703	6.19578	11.7241
1810035L17Rik	481.248	618.764	683.882	664.685
1810037I17Rik	2065.19	1462.73	1699.39	1529.13
1810041L15Rik	0	1.11489	0.989741	0.535077
1810043G02Rik	293.504	176.153	136.584	230.678
1810043H04Rik	101.661	180.612	170.236	137.931
1810044D09Rik	76.2454	25.6425	16.8256	23.7812
1810046J19Rik	593.509	486.069	550.296	435.196
1810046K07Rik	0	1.11489	0	0
1810048J11Rik	1257.06	797.146	426.579	527.955
1810049H13Rik	34.4334	66.8934	33.6512	45.1843
1810053B23Rik	0	0	0	0
1810055G02Rik	1181.39	1801.66	1238.19	1681.33
1810058I24Rik	876.413	570.823	720.68	356.718
1810062G17Rik	26.235	11.1489	10.8872	29.7265
1810062O18Rik	4.24679	2.67573	0	0
1810063B05Rik	236.189	328.892	216.753	248.514
1810063B07Rik	101.169	131.613	125.113	34.2687
1810064F22Rik	36.5322	57.4725	32.5922	23.2818
1810065E05Rik	0	0	0	0
1810074P20Rik	428.327	223.569	221.722	344.768
2010001E11Rik	17.1593	6.29912	7.63091	7.43163
2010001M06Rik	24.7265	6.68934	0.999639	4.75624
2010001M09Rik	0	0	0	0
2010002M12Rik	19.2827	9.79988	14.3512	7.89536
2010002N04Rik	324.658	683.572	993.7	432.818
2010003K11Rik	9.83812	4.45956	3.95897	10.7015
2010003K15Rik	0	0	0	0
2010003O02Rik	26.235	26.7573	23.7538	24.9703
2010005H15Rik	0	0	0	2.37812
2010009K17Rik	0	0	2.96922	3.56718
2010010A06Rik	1.18877	5.0616	0	0
2010011I20Rik	329.585	224.093	137.574	356.278
2010012O05Rik	51.7813	102.67	81.0697	64.3282
2010015L04Rik	69.9245	62.8463	46.31	76.7658
2010016I18Rik	1.63969	0	2.96922	0
2010106C02Rik	0	0	0	0
2010106E10Rik	0	0	0	0
2010106G01Rik	3303.13	1798.64	1474.76	1939.24
2010107E04Rik	885.431	1080.31	1184.72	944.114
2010107G12Rik	3.30397	2.75378	4.94871	1.18906
2010107G23Rik	131.79	11.1489	35.6307	21.4031
2010107H07Rik	40.9922	124.868	68.2922	99.8811
2010109A12Rik	1.63969	2.22978	0	0
2010109I03Rik	0.5247	1.99565	2.99892	0
2010109K11Rik	53.2898	60.204	380.457	9.51249
2010110P09Rik	0	0	0	0
2010111I01Rik	90.191	388.193	66.1642	85.7669
2010204K13Rik	349.253	506.16	347.241	501.795
2010300C02Rik	3415.74	928.703	566.132	5.9453
2010305A19Rik	139.373	327.777	162.634	347.206
2010308F09Rik	0	0	0	0
2010310C07Rik	0	0	0	0
2010317E24Rik	115.598	468.254	516.645	444.709
2010320M18Rik	90.1828	182.842	58.3947	104.637
2010321M09Rik	904.263	1143.22	908.949	897.776
2200002D01Rik	1389.39	1116.03	2702.86	1589.52
2200002J24Rik	0.819843	0	1.97948	0
2200002K05Rik	304.998	284.341	1068.92	271.106
2210009G21Rik	204.239	182.82	160.526	143.258
2210010C04Rik	0.385326	0	0	0.891795
2210010C17Rik	1.63969	0	14.8461	79.6671
2210012G02Rik	395.025	304.309	235.242	250.606
2210013O21Rik	367.29	200.68	109.861	137.931
2210015D19Rik	79.3035	112.347	127.677	51.1296
2210016F16Rik	266.449	47.9179	12.8666	552.901
2210016L21Rik	765.734	717.989	573.318	598.098
2210018M11Rik	649.316	743.743	1109.21	897.741
2210019I11Rik	3.27937	70.3272	0.989741	28.5375
2210020M01Rik	4.09922	6.68934	2.96922	2.37812
2210021J22Rik	163.149	140.476	125.697	91.5577
2210039B01Rik	153.835	345.649	398.688	456.659
2210403K04Rik	136.094	69.1231	76.2101	46.3734
2210404J11Rik	255.422	268.086	97.5885	123.436
2210404O07Rik	11.0023	11.1489	3.95897	0
2210404O09Rik	214.783	145.081	161.16	140.226
2210407C18Rik	0	0	0	0
2210408F21Rik	70.0064	14.4936	20.7846	4.75624
2210408I21Rik	49.1906	112.604	49.4871	59.453
2210409D07Rik	0	2.22978	1.97948	0
2210409E12Rik	0	0	0	0
2210411K11Rik	201.681	405.82	386.989	449.477
2210414B05Rik	0	0	0	0
2210415F13Rik	0	1.11489	0	0
2210416O15Rik	0	3.45616	0	0
2210417A02Rik	3.27937	16.0433	8.90767	8.8585
2210417K05Rik	21.3159	16.7233	6.92819	3.56718
2210420H20Rik	3.54992	5.83087	0	2.49703
2300002M23Rik	0	0	0	0
2300003K06Rik	0	0	0	0
2300005B03Rik	0	0	0	0
2300009A05Rik	131.175	158.314	52.4563	87.9905
2310001A20Rik	405.003	660.014	323.645	552.913
2310001H17Rik	50.8303	11.1489	8.90767	0
2310001H18Rik	0	0	0	0
2310001K24Rik	3.29577	1.11489	0	0
2310002D06Rik	0	0	0	0
2310002J15Rik	3.27937	2.22978	4.94871	17.8359
2310002L09Rik	0	0	0	0
2310002L13Rik	3.27937	540.721	8.90767	204.507
2310003C23Rik	667.926	945.961	551.128	888.894
2310003F16Rik	1320.68	1768.16	1618.11	2164.07
2310003H01Rik	199.222	288.723	350.368	236.623
2310003L22Rik	337.776	343.386	156.429	266.35
2310004I24Rik	198.402	185.072	117.779	145.065
2310004N24Rik	193.704	344.49	344.826	343.639
2310005A03Rik	5.96026	3.13284	6.41352	6.82521
2310005E17Rik	0	0	0	0
2310005G13Rik	0	0	3.10779	0
2310007B03Rik	0.819843	1.11489	31.6717	520.809
2310007L24Rik	0	0	0	0
2310008H04Rik	538.227	683.795	293.379	446.136
2310008H09Rik	959.332	2174.37	3001.17	3065.65
2310008N11Rik	0	0	0	0
2310009A05Rik	113.138	117.063	90.0665	45.1843
2310009B15Rik	203.321	144.936	247.435	54.6968
2310010J17Rik	9.83812	13.3787	8.90767	5.9453
2310010M20Rik	9.32982	8.60695	5.88896	2.37812
2310011J03Rik	263.99	403.59	343.985	288.942
2310014F07Rik	0.409922	0	0	0
2310014L17Rik	45.0914	73.6273	47.2206	89.2152
2310015A10Rik	70.5065	73.5827	36.6204	35.6718
2310015B20Rik	10.658	1.11489	0	1.18906
2310015D24Rik	0	0	1.20748	2.30678
2310016D03Rik	0	0	0	0
2310016M24Rik	1269.96	884.107	602.772	569.572
2310020H05Rik	0	0	0	0
2310021P13Rik	1707.3	2767.16	1941.87	1716.75
2310022A10Rik	357.46	460.449	576.029	426.873
2310022B05Rik	2219.57	2671.27	1573.69	1879.9
2310028H24Rik	137.767	85.8911	27.7128	37.3722
2310030A07Rik	0	0	0	0
2310030G06Rik	31.9739	7.88227	33.6908	26.1593
2310030N02Rik	162.37	120.419	109.861	148.633
2310033E01Rik	0	0	0	0
2310033P09Rik	168.88	408.05	374.122	362.711
2310034C09Rik	0	0	0	0
2310034G01Rik	36.0731	69.1231	0	34.4828
2310034O05Rik	6.60794	1.11489	4.73096	1.98573
2310035C23Rik	523.88	653.258	615.619	437.574
2310035K24Rik	140.193	291.008	137.574	105.826
2310036O22Rik	2458.74	3469.58	2405.08	2913.08
2310037I24Rik	2162.72	1960.89	2661.34	2402.54
2310039H08Rik	470.59	497.241	273.169	411.415
2310039L15Rik	55.6264	56.3577	38.4613	30.7729
2310040G24Rik	19.6762	10.034	8.90767	53.5077
2310042D19Rik	54.1097	16.4781	11.9066	26.1593
2310042E22Rik	0	0	0	0
2310043J07Rik	3.27937	2.22978	11.8769	34.4946
2310043L19Rik	0	0	0	0
2310043O21Rik	0	0	0	0
2310044G17Rik	555.854	683.427	643.332	815.684
2310044H10Rik	1509.94	1399.23	1830.63	1146.25
2310045N01Rik	452.554	319.973	255.353	291.32
2310046A06Rik	0	0	0	0
2310046K01Rik	355.812	25.6425	15.8359	14.2687
2310046O06Rik	213.184	216.456	235.103	198.49
2310047B19Rik	136.914	141.591	119.759	117.717
2310047M10Rik	269.729	169.463	77.1998	111.772
2310050B05Rik	0	0	0	0
2310050C09Rik	0	0	0	0
2310057J18Rik	0	0	0	0
2310057M21Rik	286.97	312.169	395.897	337.693
2310057N15Rik	0	0	0	0
2310061C15Rik	231.196	576.398	338.323	651.605
2310061I04Rik	1537.91	997.793	963.018	1025.6
2310061J03Rik	5.79629	18.1504	9.45203	6.18312
2310061N02Rik	0	0	0	0
2310065F04Rik	0	0	0	0
2310067B10Rik	1350.28	1198.51	2293.45	989.298
2310068J16Rik	8.33781	6.77853	11.0158	9.66706
2310069B03Rik	0	3.34467	0.989741	3.56718
2310069G16Rik	0	0	0	0
2310079F23Rik	248.413	249.735	188.269	253.27
2310079G19Rik	0	0	0	0
2310081J21Rik	0	0	0	0
2400001E08Rik	1313.18	1427.26	1024.38	1010.64
2400003C14Rik	1537.38	1302.19	1801.19	1455.4
2400009B08Rik	3.27937	11.1489	6.92819	9.51249
2410001C21Rik	1250.26	1403.65	837.321	1315.1
2410002F23Rik	906.722	1160.6	1372.8	1104.64
2410002I01Rik	310.721	301.02	272.179	242.568
2410002O22Rik	622.499	1078.41	1192.77	828.716
2410003K15Rik	300.063	228.563	260.45	305.137
2410003L11Rik	0.819843	0	0	0
2410004A20Rik	1.63969	0	0	0
2410004B18Rik	185.695	430.347	334.533	385.137
2410004I01Rik	0	0	0	0
2410004N09Rik	282.846	220.748	271.189	119.275
2410004P03Rik	8.14105	5.52985	15.9348	10.2021
2410006H16Rik	4058.52	1080.33	557.254	638.93
2410007B07Rik	13.0027	3.33352	9.80834	6.2069
2410012E07Rik	2.31196	2.21863	0	1.18906
2410012M07Rik	0.819843	0	0	0
2410015M20Rik	1102.7	881.877	770.019	686.088
2410016O06Rik	303.342	463.794	591.865	416.171
2410017I17Rik	0.819843	0	0	0
2410017P09Rik	90.8469	145.56	161.882	191.926
2410018L13Rik	49.0758	28.7195	57.4644	20.5826
2410018M08Rik	88.6989	64.92	53.8815	86.7063
2410021H03Rik	5.92747	1.4828	5.92855	6.82521
2410022L05Rik	332.037	421.428	162.318	315.101
2410042D21Rik	1738.72	1026.4	1029.33	1401.9
2410057H14Rik	0	0	0	0
2410066E13Rik	22.9556	37.9062	7.91793	13.0797
2410075B13Rik	27.0548	2.22978	0.989741	2.37812
2410076I21Rik	4.91906	8.91911	15.8359	85.6124
2410088K16Rik	1.07399	1.12604	7.72988	5.38644
2410089E03Rik	2199.34	1720.27	1169.97	1776.43
2410091C18Rik	1005.23	897.753	584.957	722.354
2410114N07Rik	3.32856	6.5221	1.97948	1.20095
2410124H12Rik	18.0366	0	4.94871	0
2410127L17Rik	1447.03	2995.71	1734.03	2586.21
2410131K14Rik	336.136	318.858	232.589	236.623
2410137F16Rik	0	0	0.80169	0
2410137M14Rik	0.819843	0	0	0
2410141K09Rik	0	3.35582	0	0
2500003M10Rik	2361.08	2611.1	2591.14	3010.87
2500004C02Rik	491.832	1404.91	1191.62	478.526
2510002D24Rik	156.238	145.85	104.21	151.272
2510003D18Rik	0	0	0	1.18906
2510003E04Rik	417.3	442.611	369.174	757.432
2510006D16Rik	585.918	757.222	468.346	560.82
2510009E07Rik	29.5144	0	1.97948	0
2510012J08Rik	773.137	1022.43	1104.55	1093.47
2510039O18Rik	551.705	818.295	844.101	872.699
2510049J12Rik	30.0801	16.2551	9.9469	8.02616
2600006L11Rik	0	0	0	0
2610001J05Rik	1410.89	509.504	969.947	569.81
2610002D18Rik	84.4439	217.403	192.01	269.964
2610002I17Rik	169.478	258.788	135.614	179.572
2610002J02Rik	496.005	441.496	280.097	260.404
2610002M06Rik	370.241	376.844	212.824	395.933
2610005L07Rik	1004.15	408.73	331.88	320.488
2610008E11Rik	172.987	96.9954	75.2203	77.2889
2610015P09Rik	159.041	182.842	136.169	114.15
2610016A17Rik	0	0	0	0
2610017I09Rik	0	0	0	0
2610018G03Rik	0.819843	0	0	0
2610019E17Rik	72.1462	119.293	41.5691	102.259
2610019F03Rik	516.501	204.025	289.994	197.384
2610020C07Rik	17.0773	19.2541	21.4576	34.9346
2610020H08Rik	95.9217	83.6167	73.2409	49.9405
2610021K21Rik	72.9661	105.914	92.0459	49.9405
2610027L16Rik	515.788	1004.56	1277.79	1390.17
2610028E06Rik	0.819843	1.11489	0	0
2610028H24Rik	0	0	0	0
2610029G23Rik	592.747	2254.31	650.26	1422.12
2610029I01Rik	147.121	121.646	85.385	62.0214
2610034B18Rik	878.069	1503.99	1082.77	1127.03
2610034M16Rik	0	0	0	0
2610035D17Rik	45.0914	18.9531	85.1178	48.7515
2610035F20Rik	7.37859	6.66704	0	2.37812
2610037D02Rik	22.6933	9.32047	20.8835	11.1891
2610039C10Rik	173.807	418.084	357.297	432.818
2610044O15Rik	404.699	350.086	264.142	242.378
2610100L16Rik	0	0	0	0
2610101N10Rik	2170.95	2402.91	2831.16	2671.77
2610109H07Rik	20.5453	12.3418	0	18.7753
2610203C20Rik	1401.06	869.614	719.542	1047.56
2610203C22Rik	0.819843	0	0	1.18906
2610204G22Rik	4.91906	5.57445	0.989741	2.37812
2610206C17Rik	12.2977	8.91911	5.93845	4.75624
2610301B20Rik	214.02	61.3189	42.5589	109.394
2610301G19Rik	504.425	786.454	963.553	736.397
2610305D13Rik	0.828042	9.81103	0.989741	371.367
2610306M01Rik	75.4256	30.102	44.5384	38.0499
2610307P16Rik	6.55875	1.11489	16.8256	32.1046
2610316D01Rik	0	0	0	1.18906
2610318N02Rik	7.37859	85.8465	62.3537	216.409
2610507B11Rik	9987.62	15615.9	10605.8	14320.3
2610507I01Rik	417.038	359.518	252.76	277.776
2610524H06Rik	223.784	321.891	96.2523	256.266
2610528A11Rik	77.0653	10.034	0.989741	0
2610528E23Rik	322.051	464.909	195.969	457.788
2610528J11Rik	0.819843	0	0	0
2700007P21Rik	1927.42	682.112	681.932	758.597
2700023E23Rik	133.634	208.484	241.497	206.897
2700029M09Rik	492.619	910.865	612.65	1170.02
2700038G22Rik	125.149	433.781	168.721	264.721
2700046A07Rik	0	0	0	0
2700046G09Rik	31.1541	39.0211	13.8564	5.9453
2700049A03Rik	437.362	517.599	602.95	476.813
2700050L05Rik	350.073	392.441	543.368	520.809
2700054A10Rik	429.713	173.822	216.743	156.052
2700060E02Rik	1484.74	2011.26	1526.14	2343.72
2700062C07Rik	45.0914	54.6296	60.3742	244.946
2700069I18Rik	2.55791	2.24093	1.06892	11.3317
2700070H01Rik	5.10762	6.48866	3.00881	5.27943
2700078E11Rik	2598.13	3060.92	4168.48	2659.93
2700081L22Rik	0	0	0	1.18906
2700081O15Rik	1000	1597.64	395.154	1052.85
2700086A05Rik	0	0	0	0
2700089E24Rik	3883.05	1068.34	2113.83	1674.3
2700089I24Rik	1.033	0	0	0
2700090O03Rik	0	2.22978	0	2.37812
2700094K13Rik	327.937	1017.2	762.101	932.426
2700097O09Rik	149.212	176.153	144.502	123.662
2700099C18Rik	124.731	249.98	151.411	144.614
2810001G20Rik	78.705	140.476	34.6409	59.453
2810002D19Rik	252.512	138.246	120.748	112.961
2810002N01Rik	501.966	414.181	408.832	370.654
2810004N23Rik	1713.44	1497.3	1189.67	1274.67
2810006K23Rik	377.169	444.874	281.146	220.678
2810007J24Rik	0	0	0	0
2810008D09Rik	197.566	314.399	127.677	120.095
2810008M24Rik	848.915	1040.19	3693.73	1653.98
2810011L19Rik	0	0	0	0
2810013P06Rik	233.016	195.752	146.007	226.694
2810021B07Rik	271.565	440.928	299.12	461.546
2810021J22Rik	188.056	245.265	39.4214	149.667
2810025M15Rik	378.522	513.072	236.994	227.681
2810029C07Rik	49.1906	28.9871	5.93845	13.0916
2810030E01Rik	31.1623	17.8828	83.1383	89.1795
2810032G03Rik	0	0	0	0
2810046L04Rik	506.663	512.738	714.593	634.851
2810047C21Rik1	2.52512	49.4453	8.47219	35.1605
2810049E08Rik	1.74627	1.63889	0	2.37812
2810055F11Rik	122.977	27.8722	105.902	3.56718
2810055G20Rik	7.37859	0	0.989741	0
2810403A07Rik	1109.62	901.945	1434.79	1289.16
2810403D21Rik	12.2731	13.3787	0.870972	3.56718
2810404M03Rik	0.819843	0	0	0
2810405F15Rik	4.09922	2.22978	0.989741	0
2810405K02Rik	31.2114	0	30.682	7.13436
2810407C02Rik	3185.58	3195.59	5185.31	5977.95
2810408A11Rik	91.0026	12.2638	58.3947	30.9156
2810408I11Rik	132.815	192.876	245.456	91.5577
2810408M09Rik	237.845	331.903	277.9	393.484
2810410L24Rik	27.8747	15.6085	18.8051	36.8728
2810417H13Rik	583.917	3719.97	2515.93	3059.85
2810422J05Rik	728.841	684.576	360.266	406.659
2810422O20Rik	172.167	163.889	151.43	97.503
2810428I15Rik	518.141	686.772	397.876	573.127
2810429I04Rik	7.23922	3.14399	3.95897	12.8894
2810432D09Rik	174.627	173.923	139.554	193.817
2810432L12Rik	619.802	154.97	63.3434	5.9453
2810433D01Rik	0.78705	4.76058	0	3.35315
2810442I21Rik	7.354	25.7539	13.8861	4.75624
2810442N19Rik	0.819843	0	0	0
2810453I06Rik	689.447	688.522	455.776	634.518
2810454H06Rik	14.7572	10.034	6.92819	14.352
2810459M11Rik	0	0	0	2.31867
2810468N07Rik	6.55875	0	3.95897	0
2810471M01Rik	0	1.11489	0	0
2810474O19Rik	3125.05	1616.9	1472.28	1183.48
2900002K06Rik	13.9455	16.7345	10.8872	11.8906
2900005J15Rik	109.015	0	0	0
2900006K08Rik	27.2762	18.4626	7.15583	1.27229
2900008C10Rik	9.01828	0	0.989741	0
2900009J06Rik	10.33	23.7917	14.47	11.2128
2900010M23Rik	1395.37	2618.88	1407.43	1737.25
2900011O08Rik	0	0	0	0
2900026A02Rik	1046.01	542.193	1966.69	2613.88
2900041M22Rik	10.658	0	0	0
2900052N01Rik	0	0	0	0
2900053A13Rik	215.611	186.164	145.492	187.872
2900055J20Rik	0	0	0	0
2900056M20Rik	591.788	181.649	129.884	129.608
2900057B20Rik	0	0	0	0
2900060B14Rik	0	0	0.989741	1.18906
2900064A13Rik	1110.07	1460.51	806.639	1594.53
2900076A07Rik	57.0365	22.2978	14.8461	16.6468
2900079G21Rik	0	0	0	0
2900092C05Rik	1.63969	0	0	1.18906
2900092D14Rik	0.819843	0	0	0
2900092E17Rik	573.89	683.427	624.527	755.054
2900093L17Rik	1.63969	0	0	0
2900097C17Rik	6066.02	5650.26	2921.09	5872.31
3000002C10Rik	67.7765	53.0241	39.9262	57.0392
3010001F23Rik	2.45953	1.11489	0.989741	0
3010026O09Rik	65.5875	89.1911	56.4153	28.5375
3100003L05Rik	0	0	0	0
3110001D03Rik	347.614	267.596	169.246	255.648
3110001I22Rik	54.2654	70.238	58.6422	76.0999
3110002H16Rik	415.972	485.166	911.364	447.717
3110003A17Rik	336.169	482.981	670.055	674.197
3110007F17Rik	0	0	7.91793	0
3110009E18Rik	24.5953	72.4678	38.5999	45.1843
3110009F21Rik	0	3.34467	2.96922	3.56718
3110015C05Rik	0	1.05914	0	1.18906
3110021A11Rik	3.27937	0	0.989741	1.18906
3110021N24Rik	57.43	39.0211	30.682	16.7182
3110035E14Rik	0	0	0	0
3110039I08Rik	0	0	0	0
3110039M20Rik	156.59	308.824	251.394	668.252
3110040N11Rik	192.409	113.719	192.01	134.364
3110043O21Rik	561.593	197.335	231.758	203.329
3110045C21Rik	38.4999	23.4127	27.6336	11.7479
3110047P20Rik	1.63969	0	0	0
3110052M02Rik	85.1653	53.4032	35.888	41.082
3110056K07Rik	27.0548	88.0763	36.6204	51.1296
3110056O03Rik	226.277	404.694	258.322	420.927
3110057O12Rik	33.2774	53.5147	16.2318	19.2747
3110062M04Rik	1096.98	568.571	487.309	151.058
3110070M22Rik	1.63969	1.18178	7.88824	7.13436
3110079O15Rik	3.27937	0	0	0
3110082D06Rik	4.09922	1.11489	0	0
3110082I17Rik	485.142	575.261	291.37	548.502
3110082J24Rik	0.819843	0	0	0.903686
3110099E03Rik	2.45953	1.15948	1.97948	0.927467
3200001D21Rik	2.46773	2.22978	4.94871	4.75624
3200002M19Rik	224.629	454.63	462.061	380.499
3230401D17Rik	763.323	913.094	606.711	1255.65
3300002I08Rik	8.03447	13.7243	0	19.1082
3300005D01Rik	2.45953	2.22978	11.8769	445.898
3425401B19Rik	0	0	0	0
3632451O06Rik	0	1.11489	0	0
3632454L22Rik	1.63969	2.18518	0	1.24851
3830403N18Rik	0	0	0	7.95482
3830406C13Rik	161.509	312.169	104.913	184.304
3830408C21Rik	5.7389	18.9531	5.93845	6.11177
3830417A13Rik	0	0	0	0
3830431G21Rik	5.7389	1.11489	1.10851	0.963139
3930402G23Rik	13.9373	2.22978	19.0525	7.13436
4430402I18Rik	2.46773	10.1901	1.98938	0
4632411B12Rik	2375.71	1022.36	1466.8	847.658
4632415K11Rik	439.436	673.393	103.923	117.717
4632415L05Rik	357.722	275.946	258.926	103.876
4632427E13Rik	9.01828	6.68934	3.95897	2.37812
4632428C04Rik	40.1723	20.068	27.7128	1.18906
4632428N05Rik	1.63969	0	6.46301	2.37812
4632434I11Rik	157.41	353.42	354.327	335.315
4732415M23Rik	8.19843	13.3787	0	4.75624
4732416N19Rik	2.6399	0.969954	0.702716	0
4732418C07Rik	1296.17	1057.55	738.327	928.514
4732456N10Rik	0	0	0	0
4732471D19Rik	599.863	599.119	79.397	629.584
4732471J01Rik	50.7647	11.0263	7.87834	11.5933
4732490B19Rik	0.819843	5.57445	3.95897	3.56718
4732491K20Rik	25.4151	17.8382	13.8564	2.37812
4831426I19Rik	518.986	949.886	109.861	436.385
4831440E17Rik	33.2119	11.1823	11.8769	5.95719
4832428D23Rik	1.87744	1.23753	6.5224	2.67539
4833403I15Rik	0.819843	7.80423	0	8.32342
4833412C05Rik	0	0	0.989741	0
4833417C18Rik	52.7159	192.24	92.62	40.9631
4833418N02Rik	8.19843	11.1489	6.92819	4.75624
4833419F23Rik	1.71347	7.80423	0	1.18906
4833420G17Rik	627.057	658.732	667.105	519.489
4833422C13Rik	4.00084	4.5153	3.98866	4.83948
4833422F24Rik	0	0	0	0
4833423E24Rik	0	0	0	0
4833424O15Rik	0	0	0	0
4833427F10Rik	8.18204	5.34032	7.88824	31.0226
4833427G06Rik	0	0	0	0
4833428L15Rik	0	0	0	0
4833439L19Rik	1506.54	1635.32	1751.67	1543.86
4833442J19Rik	180.103	126.417	21.7743	30.9156
4921501E09Rik	0	0	0	0
4921504E06Rik	0.819843	0	0	0
4921506M07Rik	44.2715	25.6425	23.7538	4.75624
4921507L20Rik	8.19843	4.45956	5.93845	5.9453
4921507P07Rik	155.77	14.4936	94.0254	8.32342
4921508A21Rik	88.0184	77.9977	81.3468	107.729
4921508D12Rik	0	0	0	0
4921509C19Rik	0	0	0	0
4921509O07Rik	0	0	0	0
4921510H08Rik	0	0	0	0
4921511C10Rik	0	2.22978	0.989741	0
4921511C20Rik	0	0	0	0
4921511H03Rik	0	0	0	0
4921511I17Rik	0	0	0	0
4921511M17Rik	0	0	0	0.891795
4921513D23Rik	1685.6	1740.58	1371.78	1796.67
4921513I03Rik	15.4704	10.034	4.99819	12.6397
4921515E04Rik	75.606	151.469	49.1703	58.2996
4921515J06Rik	0	7.80423	13.0151	7.13436
4921517D21Rik	0	0	0	0
4921517D22Rik	0	2.22978	1.97948	3.56718
4921517L17Rik	160.107	50.7832	12.9359	24.1141
4921523A10Rik	14.1013	10.4354	8.46229	7.5981
4921524J17Rik	540.277	305.48	139.554	267.539
4921524L21Rik	0.819843	0	0	0
4921525B02Rik	0	0	0	0
4921525O09Rik	0	0	3.95897	0
4921528I01Rik	0.819843	0	0	0
4921528O07Rik	0	0	0	0
4921530D09Rik	10.658	14.4936	4.94871	2.37812
4921530L18Rik	6.55875	13.3787	14.8461	4.75624
4921530L21Rik	0	0	0	0
4921531C22Rik	70.4901	122.571	94.0254	96.0999
4921531P14Rik	0	0	0	0
4921533I20Rik	0	0	0	0
4921536K21Rik	43.4599	68.0194	16.8454	54.2449
4921539E11Rik	0	0	0	0
4922501C03Rik	786.623	689.024	313.748	435.196
4922501L14Rik	2.45953	0	0	0
4922502D21Rik	0	0	0	0
4922502H24Rik	0	0	0	0
4922502N22Rik	0	0	0	0
4922505E12Rik	0	0	0	0
4922505G16Rik	1.63969	1.11489	1.98938	2.37812
4930401C15Rik	0	0	0	0
4930401O10Rik	0	0	0	0
4930401O12Rik	0	0	0	0
4930402F06Rik	0	0	0	0
4930402F11Rik	0.819843	0	1.1481	0
4930402H24Rik	1031.55	741.602	271.427	575.66
4930403N07Rik	0	0	0	0
4930404A05Rik	0	0	0	0
4930404A10Rik	0	0	0	0
4930404H11Rik	0	0	0	0
4930404H21Rik	0	0	0	0
4930404I05Rik	4.09922	1.11489	4.94871	3.56718
4930404N11Rik	28.6945	22.2978	4.94871	19.025
4930405A10Rik	0	0	0	0
4930405A21Rik	8.19843	10.034	7.91793	4.75624
4930405D11Rik	0	0	0	0
4930405J17Rik	0	0	0	0
4930405P13Rik	74.5402	103.194	81.7823	53.6623
4930406D18Rik	0	0	0	0
4930407I10Rik	0	0	0	0
4930408F14Rik	0	0	0	0
4930412B13Rik	0	0	0	0
4930412C18Rik	16.3969	7.80423	13.8564	2.37812
4930412F15Rik	0.819843	0	0	0
4930412O13Rik	0	0	0	0
4930413E15Rik	0	0	0	0
4930413F20Rik	0	1.10374	0.989741	0
4930413G21Rik	25.4151	37.9062	26.723	23.7812
4930413M19Rik	0	0	0	0
4930414L22Rik	56.766	32.8	22.7443	18.0618
4930414N06Rik	0.975614	0	1.25697	4.45898
4930415F15Rik	0	0	0	0
4930415L06Rik	0	0	0	0
4930415O20Rik	4.09922	3.34467	2.96922	0
4930417G10Rik	7.57535	3.36697	5.04768	0
4930417O13Rik	0	0	0	0
4930417O22Rik	1.95943	1.12604	1.31636	1.3912
4930419G24Rik	0	0	0	0
4930420K17Rik	250.093	151.993	58.5828	107.634
4930422G04Rik	144.292	321.088	384.109	402.949
4930423M02Rik	0	0	0	0
4930425K10Rik	0	0	0	0
4930425O10Rik	0.664073	0	0	0
4930426L09Rik	1.63969	4.45956	0.989741	2.37812
4930427A07Rik	236.607	581.95	419.631	576.195
4930428D18Rik	0	0	0	0
4930428E07Rik	0	0	0	0
4930428E23Rik	0	0	0	0
4930428G15Rik	0	0	0	0
4930428O21Rik	0	0	0	0
4930429B21Rik	0.83624	8.23903	2.99892	2.4019
4930429D17Rik	0.795248	3.34467	0	0
4930429F11Rik	0	0	0	0
4930429F24Rik	0	1.11489	0	1.18906
4930430A15Rik	0	0	0	0
4930430D24Rik	0	0	0	0
4930430F08Rik	397.091	234.863	219.881	203.65
4930430F21Rik	0	0	0	0
4930430J02Rik	0	0	0	0
4930431A04Rik	0	0	0	0
4930431P03Rik	1.66428	0	0	0
4930432J09Rik	2.50052	2.83182	6.85891	6.52794
4930432K09Rik	0	0	0	0
4930432K21Rik	46.7311	42.3658	42.5589	15.4578
4930432M17Rik	0	0	0	0
4930433B08Rik	0	0	0	0
4930433I11Rik	0	0	0	0
4930433N12Rik	0.828042	0	0.989741	0
4930434J06Rik	0	0	0	0
4930435E12Rik	0	0	0	0
4930438E09Rik	0	0	0	0
4930440C22Rik	0	0	0	0
4930441J16Rik	0	0	0	0
4930441O14Rik	8.19843	20.7704	10.8872	8.19263
4930442J19Rik	0	0	0	0
4930442L01Rik	0	0	0	0
4930443G12Rik	0	0	0	0
4930443O20Rik	0.819843	1.11489	1.97948	3.56718
4930444A02Rik	954.937	1076.36	611.442	572.271
4930444F02Rik	0	0	0	0
4930444G20Rik	4.7059	9.51001	10.224	6.44471
4930444M15Rik	0	1.11489	1.97948	0
4930444P10Rik	2.45953	2.22978	0	0
4930447A16Rik	0	0	0	0
4930447C04Rik	0	0	0	0
4930447J18Rik	0	0	0	0
4930447K03Rik	0	0	0.999639	0
4930447N08Rik	0	0	0	0
4930448C13Rik	0	0	0	0
4930448F12Rik	0	0	0	0
4930448H16Rik	0.819843	0	0.989741	0
4930448I06Rik	0	0	0	1.20095
4930448I18Rik	0	0	0.989741	0
4930448K20Rik	0	0	0	0
4930449E01Rik	0	0	0	0
4930449E18Rik	0	0	0	0
4930449I24Rik	0	0	0	0
4930451C15Rik	19.7582	27.1364	11.9561	17.4197
4930451I11Rik	0	0	0	0
4930452A19Rik	0	0	0	0
4930452B06Rik	0	0	36.6204	4.75624
4930452G13Rik	0	0	0	0
4930452N14Rik	0	0	0	0
4930453H23Rik	2.45953	0	0	3.56718
4930453N24Rik	306.621	409.164	322.656	570.749
4930455B14Rik	0	0	0	0
4930455C13Rik	3.77948	0	0	0
4930455C21Rik	405.486	502.202	309.146	503.936
4930455D15Rik	0	0	0	0
4930455F16Rik	0	0	0	0
4930455F23Rik	268.909	169.329	268.22	155.767
4930455H04Rik	0	0	0	0
4930455J16Rik	0	0	0	0
4930456L15Rik	0	1.11489	0	0
4930458L03Rik	0	0	0	0
4930459L07Rik	0	0	0	0
4930461G14Rik	0.819843	40.136	21.7743	26.1593
4930465A12Rik	0	0	0	0
4930465K10Rik	0.819843	7.80423	0.989741	8.32342
4930465M20Rik	0	0	0	0
4930467D21Rik	0	1.11489	0	1.18906
4930467E23Rik	50.9533	0	0	0
4930467K11Rik	0	0	0	0
4930468A15Rik	0	0	0	0
4930469G21Rik	0	4.45956	0	0
4930470H14Rik	433.295	291.555	205.173	253.639
4930470P17Rik	0	0	0	0
4930471C04Rik	0	0	0	0
4930471G03Rik	0	0	0	0
4930471I20Rik	0	0	0	0
4930471M09Rik	0	0	0	0
4930471M23Rik	773.112	649.98	580.978	506.54
4930473A02Rik	0.901828	4.81632	3.24635	6.48038
4930473A06Rik	159.05	62.4338	46.5178	30.5589
4930473O22Rik	0	0	0	0
4930474G06Rik	8.50998	2.36357	4.13712	6.90844
4930474H20Rik	0	0	0	0
4930474M22Rik	0	0	0	0
4930474N05Rik	0	0	0	0
4930474N09Rik	0	0	0	0
4930478L05Rik	0.819843	0	0	0
4930478P22Rik	0	0	0	0
4930479D17Rik	2.45953	0	0	0
4930479M11Rik	0	0	0	0
4930480E11Rik	0	0	0	0
4930480G23Rik	0	0	0	0
4930480K15Rik	0	1.0257	0	0
4930480M12Rik	0	0	2.96922	0
4930481A15Rik	6.05864	24.4272	3.50368	4.87515
4930483J18Rik	2.45953	1.11489	1.97948	3.56718
4930483K19Rik	11.3548	3.64569	3.24635	5.24376
4930483O08Rik	2.91864	0	1.16789	1.18906
4930486F22Rik	0	0	0	0
4930486I03Rik	0.951018	0	0	0
4930486L24Rik	1.63969	0	0.989741	3.56718
4930487D11Rik	0	0	0	0
4930487H11Rik	0	3.34467	0	4.75624
4930488B22Rik	0	2.31897	0.979844	0
4930488L21Rik	0	0	0	0
4930500F04Rik	0	0	0	0
4930500J02Rik	5.00924	7.03495	4.06784	4.28062
4930500L23Rik	0	0	0	0
4930502A04Rik	0	0	0	0
4930502E09Rik	0.819843	1.11489	0.989741	0
4930502E18Rik	0	0	0	0
4930503B20Rik	0	0	0	0
4930503E14Rik	0	0	1.97948	40.4875
4930503E24Rik	0	0	0	0
4930503H13Rik	0	0	0	0
4930503L19Rik	538.645	482.747	1112.46	410.88
4930503O07Rik	0	0	0	0
4930504O13Rik	0	0	0	0
4930505A04Rik	1.63969	1.11489	0	0
4930505G20Rik	0	0	0	0
4930506M07Rik	380.407	1.11489	21.7743	222.354
4930507D05Rik	4.1976	6.82312	8.05649	10.8205
4930509E16Rik	26.235	8.91911	6.92819	5.9453
4930509J09Rik	2.5989	0	0	3.60285
4930509K18Rik	0	0	0	0
4930511A02Rik	0	0	0	0
4930511E03Rik	0	0	0	0
4930511I11Rik	0	0	0	0
4930511M06Rik	387.425	349.529	319.944	381.688
4930511M11Rik	0.819843	1.11489	2.87025	3.65042
4930512B01Rik	1.69708	0	1.00954	1.21284
4930513D17Rik	2.45953	0	3.95897	1.18906
4930513N10Rik	9.86272	63.7382	31.7014	38.0618
4930513O06Rik	0	0	0	0
4930515B02Rik	0	0	0	0
4930515G01Rik	18.8564	28.9871	11.8769	19.025
4930515G16Rik	0	0	0	0
4930515L03Rik	0	0	0	0
4930515L19Rik	0	0	0	0
4930517E11Rik	0	0	0	0
4930518P08Rik	0	0	0	0
4930519D14Rik	0	0	0	0
4930519F09Rik	72.0396	62.1551	41.0941	71.4863
4930519F16Rik	0	0	0	0
4930519F24Rik	0	0	0	0
4930519G04Rik	1.12319	1.9845	4.48353	1.23662
4930519H02Rik	0.901828	0.847316	0.950152	1.07015
4930520O04Rik	9.83812	6.68934	0.989741	0
4930520P13Rik	0	0	0	0
4930521A18Rik	0	0	0.989741	0
4930521E06Rik	0	0	0	0
4930522H14Rik	0	0	0	0
4930522O17Rik	0	0	0	0
4930523C07Rik	449.455	82.4349	617.025	310.095
4930523O13Rik	0	0	0	0
4930524B15Rik	0	0	0	0
4930524C18Rik	0	0	0	0
4930524E20Rik	0	0	0	0
4930524L23Rik	3.36956	12.5648	5.93845	10.8442
4930524N10Rik	0	0	0	0
4930524O05Rik	0	0	1.79143	0
4930524O08Rik	0	0	0	0
4930525D18Rik	2.19718	0	0	0
4930525F21Rik	0.819843	1.11489	0	0
4930525G20Rik	32.7937	12.6763	6.92819	1.31986
4930525M21Rik	0	0	0	0
4930526D03Rik	0	0.568594	0	0
4930526L06Rik	0.819843	5.65249	1.97948	0
4930527F14Rik	0	0	0	0
4930527G23Rik	0	0	0	0
4930528A17Rik	3.59091	11.8513	1.77164	2.35434
4930528D03Rik	15.2573	10.4354	12.0254	10.0238
4930528F23Rik	0	0	0	0
4930528P14Rik	0	0	0	0
4930529C04Rik	0	1.42706	0	0
4930529F22Rik	0	0	0	0
4930529F24Rik	0	0	0	0
4930529K09Rik	0	0	0	0
4930529L06Rik	0	0	0	0
4930529M08Rik	2.56611	1.32672	4.41425	7.70511
4930533B01Rik	0	0	0.989741	0
4930533P14Rik	0	0	0	0
4930534B04Rik	277.927	420.313	392.927	372.176
4930538K18Rik	2.45953	0	0.989741	0
4930539C22Rik	0	0	0	0
4930539E08Rik	29.3504	34.372	17.3403	20.4994
4930539J05Rik	19.6762	35.6765	30.682	35.6718
4930539M17Rik	0	0	0	0
4930539N22Rik	0	0	0	0
4930540M03Rik	0	0	0	0
4930542C21Rik	0	0	0	0
4930542D17Rik	0	0	0	0
4930542H20Rik	0	0	0	0
4930542N07Rik	0	0	0	0
4930543E12Rik	0	0	0	0
4930544D05Rik	0	0	0	0
4930544G11Rik	0	0	0	0
4930544M13Rik	0	0	0	0
4930544O15Rik	1.63969	2.22978	0	1.18906
4930545E07Rik	0	0	0	0
4930545H06Rik	0	0	0	0
4930545L23Rik	0.819843	0	0	0
4930546C10Rik	0	0	0	0
4930546K05Rik	0	0	0.673024	1.18906
4930547C10Rik	0	0	0	0
4930547E08Rik	0	0	0	0
4930547E14Rik	0	0	0	0
4930547N16Rik	183.063	551.29	643.075	663.888
4930548G14Rik	0	0	0	0
4930548H24Rik	1.63969	4.45956	0.989741	2.37812
4930548J01Rik	0	0	0	0
4930548K13Rik	0	0	0	0
4930549C01Rik	0	0	0	0
4930549G23Rik	5.81269	1.99565	1.43512	0
4930550C14Rik	18.0366	6.68934	0.989741	8.32342
4930550L24Rik	0	0	0	0
4930552N02Rik	0	0	0	0
4930552P12Rik	2.45953	0	2.96922	0
4930553E22Rik	0	0	0	0
4930554C24Rik	0	0	0	0
4930555B11Rik	0	0	0	0
4930555G01Rik	0	0	0	0
4930555I21Rik	13.1175	1.11489	0	0
4930556C24Rik	0	0	0	0
4930556G01Rik	0	0	0	0
4930556J02Rik	0	0	0	0
4930556M19Rik	121.657	115.781	41.4405	38.3591
4930556N09Rik	0	0	0	0
4930557A04Rik	0.819843	0	0	1.18906
4930557J02Rik	0	0	0	0
4930558C23Rik	0	0	0	0
4930558G05Rik	0	0	0	0
4930558J18Rik	58.8894	132.672	68.4109	55.2081
4930558K02Rik	0	0	0.989741	0
4930562C15Rik	86.7886	184.024	102.894	131.962
4930562F07Rik	29.1536	4.52645	5.52276	28.7872
4930563D23Rik	0	0	0	0
4930563E18Rik	0	0	0	1.18906
4930563E22Rik	11.5598	30.4365	8.25444	10.8086
4930563F08Rik	0	0	0	0
4930563M20Rik	4.09922	3.13284	1.97948	4.75624
4930564B18Rik	0	0	0	0
4930564D02Rik	0	0	0	1.18906
4930564G21Rik	0	0	0	0
4930564K09Rik	0.713264	1.78382	2.79107	0
4930565A17	0	0	0	0
4930565D16Rik	0	0	0	0
4930565N06Rik	33.8677	10.7141	6.14629	17.1819
4930567H12Rik	0	0	0	0
4930567H17Rik	0	0	0	0
4930567J20Rik	0	0	0	0
4930567K20Rik	0	0	0	0
4930568D16Rik	0	0	0	0
4930568E12Rik	0	0	0	0
4930568G15Rik	0	0	0	0
4930568K20Rik	0	2.70918	0	0
4930570G19Rik	0	0	0	0
4930571K23Rik	0	0	0	0
4930572J05Rik	532.898	124.834	230.56	349.584
4930572K03Rik	0	0	0	0
4930572O13Rik	0	0	0	0
4930573O16Rik	0.78705	0	0	0
4930578C19Rik	0	0	0	0
4930578E11Rik	0.245953	2.09599	0	4.20927
4930578I06Rik	0	1.11489	0	0
4930578M01Rik	0	0	0	0
4930578N16Rik	50.0105	26.7573	12.8666	8.32342
4930578N18Rik	0	0	0	0
4930579C15Rik	4.91906	0	0	0
4930579F01Rik	0	0	0	0
4930579G18Rik	27.9403	33.4467	44.9738	38.1213
4930579G22Rik	3.27937	5.57445	0	1.18906
4930579G24Rik	210.372	347.489	337.561	339.917
4930579K19Rik	5.7389	7.80423	2.96922	0
4930581F22Rik	50.9369	70.238	27.7128	22.5922
4930583H14Rik	2.45953	10.034	0.989741	2.37812
4930583K01Rik	0.819843	0	0	0
4930583P06Rik	0	0	0	0
4930584F24Rik	0	0	0	0
4930588N13Rik	0	0	0	0
4930590J08Rik	4.91906	1.11489	5.93845	1.18906
4930590L20Rik	0	0	0	0
4930591A17Rik	0	0	0	0
4930592A05Rik	0	0	0	0
4930592I03Rik	0	0	0	0
4930593A02Rik	0.819843	0	0	0
4930593C16Rik	0	0.657785	0	0
4930594C11Rik	2.82026	0.356765	0	0
4930595M18Rik	0	0	0	0
4930596D02Rik	0	0	0	0
4930596M17Rik	0	0	0	0
4930597G03Rik	0	0	0	0
4930598F16Rik	0	0	0	0
4930599N23Rik	0	0	0	0
4931402G19Rik	7.74752	8.93026	5.26542	0.618312
4931403E22Rik	0	2.22978	0.989741	0
4931403G20Rik	0.819843	0	0	1.18906
4931406B18Rik	2.58251	2.33012	0	4.6849
4931406C07Rik	1488	772.808	679.952	585.018
4931406H21Rik	0	2.22978	2.96922	2.37812
4931406P16Rik	1006.7	1363.51	1445.92	1128.43
4931407G18Rik	0	0	0	0
4931408A02Rik	45.0914	400.245	166.286	317.479
4931408C20Rik	0	0	0	0
4931408D14Rik	34.4334	18.6632	89.1064	51.1534
4931409K22Rik	0	0	0	0
4931414P19Rik	162.329	166.119	191.02	164.09
4931417E11Rik	0	0	0	0
4931417G12Rik	24.6035	31.2169	42.5589	34.4709
4931419H13Rik	0	0	0	0
4931420L22Rik	0	5.57445	1.97948	1.18906
4931423N10Rik	0	0	0	1.18906
4931428F04Rik	235.935	459.123	89.0866	152.663
4931428L18Rik	4.49274	13.3787	8.69983	11.9976
4931429I11Rik	0.819843	0	0.989741	1.18906
4931429L15Rik	6.92768	9.24243	1.21738	1.23662
4931429P17Rik	0	0	0	0
4931430N09Rik	0	0	0	0
4931431B13Rik	0	0	0	0
4931431C16Rik	1.69708	1.18178	0	0
4931431F19Rik	0	0	0	0
4931440F15Rik	0	1.048	0	0
4931440J10Rik	0.819843	1.11489	0.989741	0
4931440L10Rik	0	0	0	0
4931440P22Rik	5.03384	5.76398	4.94871	2.4019
4932411E22Rik	0	0	0	0
4932411G14Rik	1.63969	0	0	0
4932411L15	407.101	324.344	199.849	218.68
4932411N23Rik	3.74668	0.981103	0.989741	2.35434
4932412D23Rik	0	0	0	0
4932412H11Rik	11.4778	4.45956	4.94871	7.13436
4932413F04Rik	0	0	0	0
4932414J04Rik	0	0	0	0
4932414N04Rik	1.0248	0.613189	5.07737	0
4932415G12Rik	27.8747	44.5956	21.7743	4.75624
4932415M13Rik	0.819843	0	0	0
4932416H05Rik	30.8999	26.8019	41.5196	33.9596
4932416K20Rik	0	0	2.96922	0
4932418E24Rik	0.819843	0	0	0
4932425I24Rik	0	0	0.989741	0
4932429P05Rik	0	0	0	0
4932435O22Rik	0	0	0	0
4932438A13Rik	1676.58	1705.78	842.181	1625.45
4932438H23Rik	0.819843	0	0	2.37812
4932441B19Rik	0	0	0	0
4932441J04Rik	0.819843	0	7.91793	8.32342
4932443I19Rik	0	0	0	0
4932702P03Rik	0	0	0	0
4933400A11Rik	0	0	0	0
4933400B14Rik	0	0	0	0
4933400C05Rik	0.819843	0	0	0
4933400C23	0	0	0	0
4933400F21Rik	0	0	0.989741	0
4933400L20Rik	0	0	0	0
4933401B06Rik	0	0	0	0
4933401D09Rik	1.77086	1.62774	0	2.60404
4933401H06Rik	0	0	0	0
4933401P06Rik	0	0	0	0
4933402C06Rik	0	0	0	0
4933402D24Rik	5.7389	3.34467	8.90767	5.9453
4933402E13Rik	0.819843	0	0	0
4933402J07Rik	0	0	0	0
4933402J10Rik	0	0	0	0
4933402J15Rik	0	0	0	0
4933402N03Rik	0	0	0	0
4933402N22Rik	0	0	0	0
4933402P03Rik	0	0	0	1.18906
4933403F05Rik	1287.2	1325.5	2381.89	1715.29
4933403G14Rik	0	0	0	0
4933403O03Rik	0	0	0	0
4933403O08Rik	0	0	0	0
4933404G15Rik	0	0	0	0
4933404K08Rik	24.8659	44.629	23.4866	36.742
4933404M02Rik	15.8558	0	0	1.18906
4933404O12Rik	95.5364	213.947	58.3551	53.6623
4933405D12Rik	18.6924	15.274	10.6496	15.6599
4933405E24Rik	0	0	0.989741	0
4933405L10Rik	6.55875	3.34467	0	5.9453
4933405O20Rik	0	0	0	0
4933406C10Rik	7.37859	0	1.97948	0
4933406D12Rik	0	0	0	0
4933406F09Rik	0	0	0	0
4933406G16Rik	0	0	0	0
4933406I18Rik	1.63969	1.11489	0	0
4933406J08Rik	0	0	0	0
4933406J10Rik	0	0	0	0
4933406K04Rik	0	0	0	0
4933406M09Rik	0	0	0	0
4933407C03Rik	2918.28	2153.1	3137.71	3020.67
4933407E24Rik	0	0	0	0
4933407G14Rik	2.15619	0	0.999639	0
4933407H18Rik	947.313	346.396	317.499	170.226
4933407I05Rik	0	0	0	0
4933407K13Rik	120.246	101.533	84.9792	87.9905
4933407L21Rik	0	0	0	0
4933407P14Rik	0	0	0	0
4933408B17Rik	14.7654	10.034	21.7842	8.32342
4933408J17Rik	0	0	0	0
4933408N05Rik	29.3012	14.7723	10.8773	10.8442
4933409G03Rik	0	0	0	0
4933409K07Rik	1475.13	1553.4	2410.39	1779.32
4933411E08Rik	12.478	12.1188	12.5895	12.7943
4933411G06Rik	0	0	0	0
4933411G11Rik	0	1.11489	0	2.37812
4933411K16Rik	16.3969	6.68934	3.95897	3.56718
4933411K20Rik	805.898	855.12	485.963	569.56
4933412E12Rik	625.541	214.059	82.1485	53.5077
4933412E24Rik	0	0	0	0
4933412O06Rik	0	0	0	0
4933413G19Rik	1.66428	6.80083	3.01871	8.48989
4933413J09Rik	4.91906	7.80423	10.8872	4.75624
4933413L06Rik	4.99285	1.11489	7.91793	4.86326
4933415F23Rik	0	0	0	0
4933416C03Rik	2.45953	0	0	0
4933416E03Rik	0	0	0	0
4933416I08Rik	0	0	0	0
4933416M06Rik	0	0	0	0
4933416M07Rik	4.91906	7.26908	1.61328	4.58977
4933417A18Rik	0	0	0	1.18906
4933417D19Rik	9.83812	4.45956	0	1.18906
4933417E11Rik	0	0	0	0
4933417G07Rik	0	1.12604	0	0
4933417O13Rik	0	0	0	0
4933421E11Rik	276.287	420.313	209.825	367.42
4933421I07Rik	0	0	0	0
4933421O10Rik	156.852	142.081	110.049	130.262
4933422A05Rik	2.21358	3.34467	0.989741	2.37812
4933422H20Rik	0	0	0	1.18906
4933424B01Rik	1343.05	1184.08	1453.98	948.882
4933424G05Rik	1.63969	0	0.989741	0
4933424G06Rik	0	2.22978	0	0
4933425H06Rik	0	0	0	0
4933425L06Rik	0	0	0	0
4933425O20Rik	1.63969	0	0.989741	0
4933426D04Rik	0	0	0	2.37812
4933426M11Rik	1418.14	1664.54	966.987	813.317
4933427D06Rik	5.68971	0	0	4.66112
4933427D14Rik	283.666	440.381	423.609	768.133
4933427E11Rik	7.37859	4.45956	8.0367	3.56718
4933427E13Rik	0	0	0	0
4933427G17Rik	2.45953	1.11489	0.989741	0
4933427I22Rik	0	0	0	0
4933428C19Rik	0	0	0	0
4933429K18Rik	2.45953	0	0	0
4933429O19Rik	0	0	0	0
4933430H15Rik	21.775	7.44746	18.8744	10.6064
4933430H16Rik	0	0	0	0
4933430I17Rik	7.37859	6.68934	3.95897	8.32342
4933430M04Rik	0	0	0	0
4933430N04Rik	0	0	0	0
4933431E20Rik	710.804	179.676	197.186	79.893
4933431G14Rik	1.52491	1.43821	4.46373	1.10583
4933432B09Rik	43.5583	24.7728	13.8663	27.6932
4933432G23Rik	0	0	0	0
4933432I03Rik	0	0	0	0
4933432I09Rik	0	0	0	0
4933433C11Rik	2.45953	0	0	0
4933433F19Rik	0	0	0	0
4933433G15Rik	4.91086	5.57445	2.96922	3.38882
4933433G19Rik	4.33697	5.84202	1.00954	1.23662
4933433H22Rik	0.819843	1.11489	0.989741	20.214
4933433P14Rik	370.569	398.015	372.143	330.559
4933434E20Rik	1060.91	1092.59	920.459	1219.98
4933434I20Rik	0	0	0	0
4933436C20Rik	41.812	66.8934	13.8564	38.0499
4933436E23Rik	0	0	0	0
4933436H12Rik	0.819843	0	0	0
4933436I01Rik	0	0	0	0
4933437F05Rik	18.0366	3.34467	12.8666	4.75624
4933438B17Rik	0	0	1.97948	1.11772
4933438K21Rik	3.23018	3.33352	0.979844	4.57788
4933439C10Rik	92.0192	79.7146	40.8664	41.2247
4933439F18Rik	981.074	1060.9	958.891	891.7
4933439K11Rik	1.63969	0	0	1.18906
4933440J02Rik	1.63969	0	0	0
4933440M02Rik	0	3.34467	0.989741	0
5031410I06Rik	0	3.34467	0	1.42687
5031414D18Rik	2.45953	1.11489	0	0
5031425E22Rik	41.812	82.5018	93.0357	96.3139
5031425F14Rik	0	0	0	0
5031426D15Rik	10.0267	8.38397	18.429	18.5018
5031434C07Rik	0	0	0	0
5031434O11Rik	17.2167	0	2.96922	2.37812
5031439G07Rik	1815.95	1714.71	1457.89	1789.74
5033403H07Rik	0	0	0	0
5033404E19Rik	0	0	0	0
5033406O09Rik	74.6058	2.22978	38.5999	65.3983
5033411D12Rik	45.0914	22.2978	2.96922	10.7015
5033414D02Rik	640.298	745.861	411.732	412.604
5133401N09Rik	93.1342	135.18	88.0672	89.5363
5330411J11Rik	0	3.34467	1.97948	2.37812
5330413P13Rik	0	0	0	0
5330417C22Rik	232.836	0	4.94871	1.18906
5330426P16Rik	44.2715	6.68934	34.6409	7.13436
5330434G04Rik	0	0	0	0
5330437I02Rik	0	0	0.989741	0
5330439B14Rik	0	0	0	0
5430401F13Rik	0.819843	0	0	0
5430402E10Rik	0	0	0	0
5430402O13Rik	4.91906	0	0	0
5430403N17	0	0	0	0
5430405G05Rik	1.63969	0	0	0
5430405H02Rik	63.5215	32.3541	59.2459	58.4423
5430407P10Rik	408.282	366.821	810.103	321.046
5430411K18Rik	530.865	604.549	723.155	636.944
5430416N02Rik	372.209	139.361	131.636	156.956
5430416O09Rik	7.88689	1.29327	7.88824	0
5430417L22Rik	447.635	527.276	536.499	1078.43
5430419D17Rik	0	1.11489	0	2.37812
5430421F17Rik	6.89488	9.95596	0	2.84185
5430421N21Rik	0.819843	0	0	1.37931
5430425J12Rik	0	0	0	0
5430427M07Rik	5.02564	9.67724	0.603742	17.9429
5430427O19Rik	20.3895	13.0554	2.96922	9.07253
5430428K19Rik	0	0	0	0
5430434I15Rik	0	0	0.989741	2.37812
5430435G22Rik	4.09922	11.1489	8.90767	35.6718
5430437J10Rik	0	0	0	0
5430437P03Rik	2908.64	2429.17	1769.66	2292.9
5430440P10Rik	5.34538	3.19973	2.00917	0
5530400C23Rik	0	0	0	0
5530401A14Rik	0	0	0	0
5530601H04Rik	87.6331	226.668	67.7676	152.093
5730403B10Rik	478.797	375.294	232.757	319.845
5730403I07Rik	13.3798	2.22978	1.93989	0
5730405O15Rik	11.4778	4.45956	2.96922	0
5730408K05Rik	32.7937	84.7316	31.6717	77.2889
5730409E04Rik	227.023	194.727	34.7696	204.4
5730412P04Rik	0	0	0	0
5730416F02Rik	0.819843	0	0	0
5730419I09Rik	722.282	358.994	990.731	762.188
5730420D15Rik	2.45953	0	0	0
5730422E09Rik	4.89447	0	0	1.18906
5730435O14Rik	0	0	0	0
5730437N04Rik	818.614	624.371	607.701	649.108
5730455O13Rik	459.932	512.849	410.743	319.857
5730455P16Rik	480.879	556.073	431.507	432.628
5730457N03Rik	0	0	0	0
5730460C07Rik	0.94282	2.24093	0	0.475624
5730469M10Rik	1569.03	493.74	3272.94	2964.49
5730480H06Rik	23.7755	17.8382	11.8769	17.8359
5730494M16Rik	299.087	717.487	516.17	526.706
5730494N06Rik	819.36	679.971	336.74	465.363
5730507C01Rik	263.875	165.762	189.1	303.543
5730508B09Rik	429.598	231.875	275.148	275.874
5730522E02Rik	0	0	0	0
5730528L13Rik	282.862	228.552	305.83	329.382
5730559C18Rik	1155.97	220.748	2496.95	604.043
5730577I03Rik	83.0911	57.3945	61.4827	66.4447
5730590G19Rik	267.269	742.516	896.706	1029.73
5830403L16Rik	0	0	0	0
5830403M04Rik	0	0	0	0
5830405N20Rik	0	0	0	0
5830411N06Rik	0	0	0	0
5830415F09Rik	76.2454	96.9954	51.4665	84.4233
5830416I19Rik	0	0	0	0
5830416P10Rik	42.4761	62.1997	165.801	282.414
5830417I10Rik	1844.51	1686.07	2488.38	2230.92
5830418K08Rik	1143.38	1203.56	951.31	893.948
5830418P13Rik	0	1.11489	0	0
5830428M24Rik	4.09922	2.22978	0.989741	5.9453
5830432E09Rik	0	0	1.09861	2.44946
5830433M19Rik	186.104	240.816	199.928	204.518
5830473C10Rik	2.45953	3.34467	0	0
5930403L14Rik	0.819843	0	0.989741	3.56718
5930412G12Rik	0	0	0	0
5930416I19Rik	921.578	643.291	1214.4	846.611
5930434B04Rik	484.068	444.005	301.881	450.523
5930438M14	0	0	0	0
6030405A18Rik	1.45112	0	0	0
6030407O03Rik	0	0	0.989741	0
6030408B16Rik	12.7158	9.90022	13.124	6.02854
6030419C18Rik	8.19843	233.012	26.723	129.608
6030422M02Rik	217.234	179.598	150.668	187.015
6030429G01Rik	113.417	92.5358	9.89741	19.025
6030440G07Rik	26.4727	26.0773	20.2996	24.9941
6030446N20Rik	67.2272	42.3658	68.2922	10.7015
6030458C11Rik	832.428	738.893	955.427	828.87
6030466F02Rik	0	0	0	0
6030468B19Rik	1.63969	0	0	0
6030498E09Rik	0	0	0	0
6230400D17Rik	5.7389	18.9531	5.93845	9.51249
6230409E13Rik	1529.01	782.652	77.1998	237.812
6230427J02Rik	4.91906	1.11489	0	2.37812
6330403A02Rik	0	0	0	0
6330403K07Rik	8.19843	24.5276	2.96922	7.13436
6330406I15Rik	13.6422	23.7248	40.7872	25.5291
6330407A03Rik	4.97645	0	2.21702	1.3912
6330407J23Rik	277.927	35.6765	52.4563	8.32342
6330408A02Rik	175.291	171.693	93.0258	84.4233
6330409D20Rik	23.7755	1.11489	0	1.18906
6330409N04Rik	328.823	409.164	250.405	332.925
6330410L21Rik	9.05107	1.34902	3.95897	10.4756
6330415B21Rik	0	0	0	0
6330416G13Rik	185.285	95.8805	37.6102	71.3436
6330418K02Rik	16.7166	23.6245	12.6687	14.2568
6330439K17Rik	36.1715	42.232	5.49306	10.0595
6330503K22Rik	273.902	675.623	559.204	685.838
6330512M04Rik	6.55875	8.94141	12.8666	7.13436
6330527O06Rik	0	0	0	0
6330545A04Rik	16.3969	22.2978	11.8769	3.56718
6330549D23Rik	30.3588	35.2194	17.4491	36.8252
6330578E17Rik	2487.63	1792.33	3759.53	2144.58
6430411K18Rik	0	0	0	0
6430527G18Rik	1424.07	644.406	818.506	1461.03
6430531B16Rik	20.4961	6.68934	2.96922	13.0797
6430548G04	34.9335	27.0472	23.5756	40.321
6430548M08Rik	16.856	48.1298	3.95897	29.7265
6430550D23Rik	26.3088	8.27248	3.95897	1.18906
6430562O15Rik	0.869034	11.6171	5.30501	0
6430571L13Rik	15.577	7.80423	0.989741	0
6430573F11Rik	0	0	0	0
6430584L05	0	0	0	0
6430598A04Rik	409.102	110.374	57.405	262.782
6430704M03Rik	3.27937	0	0	0
6430706D22Rik	3328.55	3025.71	3734.79	2429.27
6530401N04Rik	357.116	454.752	394.927	366.409
6530402F18Rik	6.55875	159.92	0	32.1046
6530411M01Rik	0	0	0	0
6530418L21Rik	5.46836	1.11489	0.999639	2.88942
6530439I21	0	0	0	0
6720401G13Rik	1737.95	663.772	484.043	435.184
6720456B07Rik	2387.38	1153.97	2942.5	1524.38
6720456H20Rik	268.909	340.041	295.933	185.493
6720463M24Rik	158.295	466.024	584.937	512.485
6720468P15Rik	3.27937	0	0	1.18906
6720483E21Rik	6.55875	0	3.18697	2.37812
6720489N17Rik	82.1975	188.751	135.981	89.4293
6820408C15Rik	0.819843	0	0	0
6820431F20Rik	13123.5	5550.38	4078.33	3890.7
7420426K07Rik	0	0	0	0
7420461P10Rik	0	0	0	0
7420700N18Rik	0	1.11489	0.989741	3.44828
7420701I03Rik	0	0	0	0
7530416G11Rik	0	0	0.524563	0
7530420F21Rik	4.09922	17.8382	3.95897	17.8359
7630403G23Rik	0.819843	0	0	0
8030411F24Rik	0	0	0	0
8030423F21Rik	13.88	11.9293	15.6973	8.03805
8030423J24Rik	0	0	0	0
8030442B05Rik	23.5459	12.2749	3.95897	11.9025
8030443G20Rik	0	0	0	0
8030462N17Rik	548.91	564.134	769.029	568.371
8430403D17Rik	3.74668	2.44161	5.16645	8.97741
8430406I07Rik	444.519	690.183	457.26	763.413
8430408G22Rik	0	0	19.2307	7.15815
8430410A17Rik	924.915	608.73	496.85	675.386
8430410K20Rik	1296.12	939.841	842.27	1208.09
8430419L09Rik	121.337	125.982	51.8427	46.3734
8430422H06Rik	0	0	0	0
8430423G03Rik	0	1.11489	0	8.32342
8430427H17Rik	1568.75	189.531	2635.95	2650.43
8430429K09Rik	85.6163	151.012	67.1539	103.639
8430431K14Rik	4.97645	1.14834	2.91974	1.41498
8430436N08Rik	0	0	0	0
8430437L04Rik	0	0	0	0
9030025P20Rik	149.359	224.561	107.486	104.602
9030204H09Rik	0	0	0.999639	0
9030224M15Rik	0.819843	0	0	0
9030404E10Rik	3.27937	0	10.8872	1.18906
9030418K01Rik	2.45953	0	0	0
9030425E11Rik	82.8042	56.8594	139.554	74.9108
9030612E09Rik	2.45953	0	0	0
9030617O03Rik	19.2007	1.37131	232.767	177.444
9030619P08Rik	0	0	0.989741	0
9030624G23Rik	99.1683	59.0891	143.364	69.025
9030624J02Rik	1198.61	1666.76	1550.92	1143.88
9030625A04Rik	224.637	264.229	263.271	186.683
9130008F23Rik	230.36	95.8805	176.184	75.6956
9130011E15Rik	255.791	573.053	308.799	538.644
9130011J15Rik	1332.12	1648.23	849.426	1003.35
9130014G24Rik	0	0	0	0
9130015A21Rik	0	1.11489	0.989741	2.37812
9130015L21Rik	0	0	0	0
9130017N09Rik	1170.74	4.45956	892.747	458.989
9130019O22Rik	61.644	91.7665	57.8108	58.157
9130019P16Rik	2.54971	4.74943	2.04876	0
9130023H24Rik	57.7498	75.6564	112.177	59.9049
9130024F11Rik	44.2715	26.7573	25.7333	34.4828
9130204L05Rik	0	0	0	0
9130206I24Rik	35.2533	138.213	18.8051	82.0452
9130209A04Rik	2.6399	2.47505	0.455281	1.15339
9130221F21Rik	38.0571	41.6634	23.6449	44.7087
9130221H12Rik	133.561	121.456	159.517	114.031
9130227L01Rik	11.2565	6.89002	0	2.54459
9130230L23Rik	11.4778	0	9.89741	0
9130401M01Rik	790.19	1156.55	832.372	1155.77
9130404H23Rik	0	3.34467	0	0
9130409I23Rik	18.7908	3.71258	0	0
9230009I02Rik	0	0	0	0
9230102K24Rik	0	0	0	0
9230102O04Rik	0	0	0	0
9230104L09Rik	11.4778	0	0	0
9230105E05Rik	3.21379	2.26323	2.95933	2.42568
9230107M04Rik	0	0	0	0
9230110C19Rik	168.609	108.345	35.1853	19.0488
9230110F15Rik	0	0	0	0
9230112D13Rik	0	0	0	0
9230112J17Rik	0	0	5.90876	8.48989
9230114K14Rik	28.178	60.0145	19.8542	39.2152
9230115E21Rik	0	0	0	0
9230116N13Rik	7.37859	14.0253	19.6068	9.39358
9330020H09Rik	30.3752	27.8834	34.0273	40.4281
9330111N05Rik	0	0	0	0
9330117O12	0	0	0	0
9330133O14Rik	196.992	140.521	91.0562	117.717
9330151L19Rik	79.1313	79.4024	47.5868	78.0975
9330158H04Rik	53.667	59.5462	97.1926	30.8799
9330159F19Rik	128.469	8.89682	19.6761	2.77051
9330159M07Rik	31.3508	11.1043	8.49198	11.3674
9330162B11Rik	0	0	0	0
9330175E14Rik	0	1.048	0	1.12961
9330175M20Rik	0.819843	1.11489	0	0
9330178D15Rik	0	0	0	0
9330179D12Rik	28.7355	7.80423	4.94871	1.18906
9330182L06Rik	1.63969	1.11489	0	1.18906
9330182O14Rik	0	0	0	0
9430007A20Rik	0	0	0	0
9430008C03Rik	648.201	575.773	492.911	650
9430014N10Rik	0	0	0	0
9430015G10Rik	472.238	675.634	377.101	486.326
9430016H08Rik	266.785	299.058	420.056	269.917
9430018G01Rik	5.71431	12.2638	42.2817	49.0012
9430019J16Rik	0	0	0	0
9430020K01Rik	525.52	330.007	613.659	110.523
9430021M05Rik	0.696867	0	1.158	0
9430023L20Rik	869.034	741.401	518.624	493.46
9430031J16Rik	0	0	0	0
9430032N09Rik	0	0	0	0
9430037G07Rik	45.5505	28.6527	19.0327	21.4982
9430038I01Rik	80.9759	64.9646	66.956	57.5386
9430041J12Rik	0.516501	1.11489	3.32553	1.18906
9430060I03Rik	2.76287	2.30782	3.13748	0
9430069I07Rik	0	0	0	0
9430076C15Rik	1.63969	0	0	0
9430076G02Rik	0	0	0	0
9430083A17Rik	6.19802	3.84637	3.13748	2.50892
9430091E24Rik	21.7914	29.6338	11.5305	14.7919
9530002B09Rik	0	0	0	0
9530003J23Rik	0.819843	0	0	0
9530008L14Rik	67.9322	59.0557	50.7242	91.629
9530026F06Rik	6.66533	7.05725	2.34569	8.18074
9530026P05Rik	4.91906	1.11489	0	3.56718
9530027J09Rik	13.5438	9.15324	21.3685	24.1498
9530036O11Rik	6.21441	0	2.95933	1.30797
9530048J24Rik	3.27937	3.34467	0	0
9530051G07Rik	24.5953	2.22978	4.94871	0
9530052E02Rik	6.05864	2.12944	3.4344	2.98454
9530053A07Rik	0.819843	2.22978	46.5178	19.025
9530059O14Rik	0	0	0	0
9530068E07Rik	3226.08	4752.77	3190.93	3655.17
9530077C05Rik	54.9295	89.1911	28.7025	7.13436
9530080O11Rik	0.828042	0	0	0
9530082P21Rik	258.677	348.258	295.933	213.329
9530091C08Rik	20.8732	26.6347	20.0819	15.8383
9630013A20Rik	0	0	0	0
9630028B13Rik	8.64115	3.64569	3.01871	3.70987
9630028H03Rik	0	0	0	0
9630033F20Rik	1430.64	529.639	1016.44	636.908
9830001H06Rik	568.725	300.92	135.525	1616.21
9830107B12Rik	3.32856	0	2.2863	1.22473
9830132P13	4.66491	15.051	22.0613	9.53627
9830147E19Rik	268.031	188.227	150.728	171.082
9830166K06Rik	0	0	0	0.820452
9930005F22Rik	17.2167	14.4936	4.94871	10.7015
9930012K11Rik	16.3969	35.6765	139.554	70.1546
9930013L23Rik	4.09922	3.34467	59.1865	0
9930014A18Rik	60.6848	30.0128	6.97768	12.176
9930021D14Rik	0	2.0068	2.07846	3.26992
9930021J03Rik	1853.67	1841.81	1325.2	910.916
9930023K05Rik	0.819843	0	0	0
9930104L06Rik	200.099	191.694	129.636	184.411
9930111J21Rik1	42.7794	29.7118	652.269	234.435
9930111J21Rik2	2.73828	1.57199	28.0592	29.0012
A030009H04Rik	18.8564	3.34467	8.90767	16.6468
A130010J15Rik	175.422	152.784	352.506	160.678
A130022J15Rik	1230.08	574.168	670.965	639.727
A130040M12Rik	30138	111636	16383.5	164574
A130049A11Rik	32.9741	27.2702	9.74895	25.7669
A130077B15Rik	2017.74	1691.44	1245.28	1430.8
A1bg	0	0	0	0
A1cf	1.63969	0	0	0
A230001M10Rik	0	0	0.0593845	0
A230020J21Rik	3.11541	1.38246	0	0
A230028O05Rik	0	4.45956	0	2.37812
A230046K03Rik	2698.59	2009.88	2314.68	1691.02
A230050P20Rik	10.2152	0	0	0
A230051G13Rik	178.767	154.189	254.354	202.14
A230056J06Rik	1.64789	0	0	0.214031
A230056P14Rik	80.2791	29.6784	27.8612	1.81926
A230057D06Rik	7.01786	0	1.02933	0
A230065H16Rik	0	0	0	0
A230070E04Rik	0	0	0	0
A230072C01Rik	224.719	183.176	140.108	113.46
A230072E10Rik	50.7073	61.9767	120.729	34.5303
A230073K19Rik	3.41875	7.38057	5.27532	2.65161
A230077H06Rik	3.49253	1.23753	4.69137	2.39001
A230108P19Rik	0	8.91911	1.97948	1.18906
A2ld1	127.896	266.459	88.1266	258.026
A2m	0	0	0	0
A330009N23Rik	29.4652	13.6017	15.8359	17.8359
A330021E22Rik	191.843	109.259	82.1485	206.897
A330023F24Rik	36.893	0	3.95897	5.9453
A330032B11Rik	52.1011	55.7222	53.0798	36.8966
A330035P11Rik	16.1099	15.7311	11.5899	13.6147
A330040F15Rik	1.63969	4.45956	0.989741	4.75624
A330041J22Rik	0.819843	0	0	0
A330048O09Rik	0	0	0.950152	0
A330049M08Rik	28.6945	2.22978	5.93845	17.8359
A330049N07Rik	2.47593	3.34467	5.29512	7.72889
A330050B17Rik	105.407	105.223	64.4223	84.1023
A330050F15Rik	0	0	0	0
A330069E16Rik	253.004	547.466	388.681	297.182
A330070K13Rik	0	0	0	0
A330076C08Rik	0	1.10374	0	0
A330076H08Rik	6.55875	0	0.989741	0
A330093E20Rik	0	0	0	0
A330102I10Rik	1.63969	2.22978	1.97948	0
A3galt2	2.45953	8.91911	0.989741	2.37812
A430005L14Rik	197.582	275.378	186.071	236.623
A430033K04Rik	202.829	154.735	173.739	135.862
A430035B10Rik	4.09922	1.11489	3.95897	0
A430071A18Rik	0.844439	0	0	0
A430078G23Rik	129.248	226.523	133.467	137.229
A430084P05Rik	0	0	0	0
A430088P11Rik	2.0906	8.39512	0	7.89536
A430089I19Rik	1.50031	2.22978	0	1.53389
A430090L17Rik	0	0	0.989741	0
A430092G05Rik	0	0	0.930357	0
A430093F15Rik	5.7389	3.34467	0	1.18906
A430105I19Rik	309.893	188.416	714.118	1027.38
A430107O13Rik	359.911	36.7913	0	10.7015
A430107P09Rik	139.193	92.0341	85.1375	103.246
A430110N23Rik	40.9922	35.6765	1.97948	13.0797
A4galt	0.828042	1.12604	0	0
A4gnt	0	0	0	0
A530006G24Rik	0	0	0	0
A530013C23Rik	1.63969	1.11489	0	0
A530016L24Rik	1.63969	0	0	0
A530032D15Rik	0.918225	0	0	0
A530046M15	0	0	0.989741	0
A530050N04Rik	5.85368	9.19784	7.33398	1.71225
A530053G22Rik	0	0	0	0
A530054K11Rik	195.647	293.941	231.332	206.183
A530058N18Rik	0	0	0	0
A530064D06Rik	5.36178	10.3908	6.83911	5.75505
A530065N20	1.86924	0	0	2.39001
A530072M11Rik	12.2977	7.80423	1.97948	0
A530088E08Rik	0.819843	1.11489	0	0
A530098C11Rik	0	0	0.989741	0
A530099J19Rik	1.63969	0	0	0
A630001G21Rik	0.828042	7.80423	1.97948	14.2687
A630007B06Rik	697.654	715.759	499.819	376.932
A630010A05Rik	2.0988	2.22978	1.83102	4.73246
A630012P03Rik	0	0	0	0
A630019I02Rik	0	0	0	0
A630020A06	26.9483	30.9716	18.5379	35.0892
A630023A22Rik	1.63969	31.8078	1.97948	4.19738
A630033H20Rik	98.8239	19.6778	5.58214	1.18906
A630055G03Rik	428.868	1371.26	1100.09	585.054
A630066F11Rik	9.05107	43.6702	20.0027	22.5922
A630071L07Rik	0.819843	0	0.989741	0
A630072M18Rik	39.4263	38.7424	44.6472	34.1023
A630073D07Rik	0	0	0	0
A630075F10Rik	68.5389	52.79	53.4163	44.5184
A630076J17Rik	0	0	0	1.18906
A630077J23Rik	0	0	0	0
[truncated: 20,485 more rows]

## Sheet: RNAseq_DESeq2_results
Gene	baseMean	log2FoldChange	lfcSE	stat	pvalue	padj
0610007C21Rik	286.772	0.641737	0.557896	1.15028	0.250028	0.717819
0610007L01Rik	1949.42	-0.55648	0.419219	-1.32742	0.184369	0.65393
0610007N19Rik	12.1809	1.45687	2.80489	0.519403	0.60348	NA
0610007P08Rik	779.961	-0.0832212	0.75282	-0.110546	0.911976	0.982422
0610007P14Rik	833.875	0.21285	0.430318	0.494635	0.620858	0.916519
0610007P22Rik	460.171	0.337842	0.435214	0.776266	0.437592	0.8401
0610009B22Rik	332.748	0.198723	0.47388	0.419352	0.674959	0.929599
0610009D07Rik	1122.67	-0.256413	0.331824	-0.772738	0.439677	0.841148
0610009L18Rik	5.61873	2.42749	2.94151	0.825253	0.409228	NA
0610009O20Rik	764.338	-0.35464	0.558079	-0.635466	0.525125	0.87656
0610010B08Rik	720.912	-0.469005	0.510816	-0.918149	0.358541	0.793172
0610010F05Rik	901.826	-0.20988	0.480111	-0.437148	0.662004	0.924611
0610010K14Rik	562.607	0.323884	0.568847	0.56937	0.569105	0.9004
0610010O12Rik	974.092	-0.776277	0.845109	-0.918552	0.35833	0.793172
0610011F06Rik	462.234	0.669838	0.446564	1.49998	0.133619	0.588914
0610011L14Rik	576.437	-0.241091	0.452415	-0.532898	0.594104	0.908735
0610012G03Rik	468.666	-0.0366311	0.542509	-0.0675217	0.946166	0.987807
0610030E20Rik	411.889	0.220787	0.717129	0.307876	0.758176	0.952622
0610031J06Rik	1468.76	0.576847	0.346394	1.66529	0.0958546	0.508402
0610037L13Rik	226.369	0.0955439	0.4782	0.199799	0.841638	0.973261
0610037P05Rik	358.934	-0.139945	0.496834	-0.281675	0.778193	0.957138
0610038B21Rik	7.73649	1.85277	1.93086	0.959555	0.337279	NA
0610039K10Rik	2.34717	2.84226	3.84515	0.73918	0.459798	NA
0610040B10Rik	4.98541	0.104329	2.20755	0.0472601	0.962306	NA
0610040F04Rik	11.1943	-0.78441	1.75438	-0.447114	0.654793	NA
0610040J01Rik	27.1651	5.60571	2.76756	2.02551	0.042815	0.348422
0910001L09Rik	413.891	0.023011	0.502978	0.0457494	0.96351	0.992447
100043387	36.064	0.597981	1.51775	0.393991	0.693588	0.936185
1110001A16Rik	295.994	0.157211	0.632062	0.248728	0.803571	0.964302
1110001J03Rik	152.13	0.296655	0.588858	0.503779	0.614417	0.915117
1110002B05Rik	848.778	-0.10857	0.375743	-0.288948	0.772621	0.955915
1110002L01Rik	365.233	0.619899	0.624595	0.992482	0.320963	0.775204
1110002N22Rik	196.931	0.0475362	0.540899	0.0878837	0.929969	0.98472
1110003E01Rik	1679.4	0.750815	0.686331	1.09396	0.273975	0.739538
1110004E09Rik	383.765	-0.788951	0.700216	-1.12673	0.259858	0.727842
1110004F10Rik	2098.82	-0.54942	0.405173	-1.35601	0.175094	0.644344
1110005A03Rik	281.176	0.348942	0.681213	0.512237	0.608485	0.913489
1110006O24Rik	24.7301	0.402463	1.16366	0.34586	0.729448	0.943711
1110007C09Rik	687.991	-0.576032	0.623859	-0.923337	0.355832	0.793018
1110008F13Rik	2172.61	-0.641741	0.345057	-1.85981	0.0629118	0.422615
1110008J03Rik	152.028	0.507444	0.55584	0.912931	0.361279	0.794138
1110008L16Rik	444.018	-0.295997	0.393086	-0.753009	0.451444	0.847177
1110008P14Rik	264.698	0.0047453	0.514265	0.00922733	0.992638	0.998321
1110012J17Rik	6938.81	0.763111	0.523469	1.4578	0.144897	0.607724
1110012L19Rik	200.182	0.829612	0.735854	1.12741	0.259567	0.72736
1110014N23Rik	828.147	0.514974	0.406804	1.2659	0.205548	0.679282
1110017F19Rik	35.413	-2.39203	1.38877	-1.72241	0.0849956	0.484932
1110018G07Rik	1104.47	0.341363	0.357798	0.954065	0.340051	0.783866
1110018J18Rik	278.939	-0.79296	0.673995	-1.17651	0.239392	0.710345
1110019D14Rik	51.8559	1.15197	0.980945	1.17435	0.240255	0.710641
1110020A21Rik	6.10674	0.664928	2.97019	0.223867	0.822861	NA
1110020G09Rik	981.393	-0.464937	0.504976	-0.920711	0.357201	0.793172
1110021J02Rik	510.745	1.06043	0.467303	2.26925	0.0232531	0.258682
1110021L09Rik	416.199	0.0859154	0.554919	0.154825	0.876959	0.977163
1110028C15Rik	167.299	-0.446768	1.0324	-0.432746	0.665199	0.925153
1110031I02Rik	307.522	1.19253	0.747299	1.59579	0.110536	0.545146
1110032A03Rik	95.8493	0.986234	0.748977	1.31677	0.187914	0.659608
1110032A04Rik	236.455	0.802234	2.04534	0.392224	0.694893	0.936943
1110034A24Rik	658.219	-0.549171	0.565685	-0.970808	0.331644	0.78179
1110034B05Rik	244.792	-0.154541	0.573998	-0.269235	0.787748	0.959897
1110034G24Rik	39.3209	1.41437	0.977284	1.44724	0.147829	0.611785
1110037F02Rik	1718	0.150933	0.394793	0.38231	0.702232	0.938699
1110038B12Rik	1814.72	0.608074	0.539253	1.12762	0.259479	0.72736
1110038D17Rik	299.606	-0.118631	0.510391	-0.232431	0.816203	0.968825
1110038F14Rik	361.751	-0.0383817	0.456995	-0.0839871	0.933067	0.985629
1110046J04Rik	109.423	2.45798	0.993356	2.47442	0.0133452	0.187279
1110049F12Rik	344.132	0.0612469	0.577134	0.106122	0.915485	0.982422
1110051M20Rik	236.989	2.93754	0.590755	4.97252	6.60875e-07	9.50572e-05
1110054M08Rik	45.3822	1.13185	0.901843	1.25504	0.209463	0.682709
1110054O05Rik	401.663	0.290747	0.433314	0.670986	0.50223	0.867146
1110057K04Rik	1402.2	0.168458	0.383434	0.43934	0.660415	0.924611
1110058L19Rik	127.464	0.369555	0.841401	0.439214	0.660506	0.924611
1110059E24Rik	678.067	-0.0416429	0.605305	-0.0687966	0.945152	0.987802
1110059G10Rik	161.969	0.0695658	0.544164	0.12784	0.898276	0.981389
1110065P20Rik	186.474	0.769286	0.668754	1.15033	0.250009	0.717819
1110067D22Rik	1532.56	-1.11031	0.903348	-1.22911	0.219032	0.692788
1190002F15Rik	176.802	0.722901	0.589336	1.22664	0.219959	0.693276
1190002H23Rik	7.53316	4.66679	3.21235	1.45277	0.146288	NA
1190002N15Rik	314.907	1.3754	1.11991	1.22813	0.219398	0.692788
1190005F20Rik	816.442	-0.273338	0.518967	-0.526697	0.598404	0.910112
1190005I06Rik	31.764	0.371964	1.40384	0.264962	0.791039	0.960753
1190007F08Rik	121.381	2.60786	1.56213	1.66942	0.0950338	0.506854
1190007I07Rik	179.807	0.302844	0.548737	0.551894	0.581021	0.903793
1200009I06Rik	84.9264	-0.871087	1.36093	-0.640067	0.522129	0.875501
1200011I18Rik	769.206	-0.174714	0.451947	-0.386581	0.699066	0.938529
1200011M11Rik	928.462	-0.266582	0.383903	-0.694399	0.487432	0.860294
1200014J11Rik	999.503	-0.770615	0.514472	-1.49787	0.134166	0.590253
1200016B10Rik	401.344	0.223657	0.651458	0.343318	0.731359	0.944268
1300001I01Rik	3813.9	-0.419304	0.429938	-0.975266	0.329428	0.781601
1300002E11Rik	81.1018	0.218569	0.751486	0.290849	0.771167	0.955856
1300010F03Rik	617.144	-0.00605354	0.589149	-0.010275	0.991802	0.998321
1300014I06Rik	547.647	0.261469	0.429053	0.609409	0.542253	0.887495
1300018I17Rik	298.24	0.644527	0.530256	1.2155	0.224175	0.698818
1300018J18Rik	280.001	-0.17033	0.5605	-0.30389	0.761211	0.953526
1500001M20Rik	618.879	-0.704455	0.42047	-1.6754	0.0938559	0.504832
1500002O20Rik	544.527	0.346218	0.389695	0.888435	0.374307	0.804057
1500003O03Rik	5414.68	0.577113	0.560208	1.03018	0.302927	0.766436
1500004A13Rik	79.8171	-0.255672	0.728418	-0.350997	0.725591	0.943481
1500010J02Rik	999.627	-0.0814511	0.553248	-0.147223	0.882956	0.978625
1500011B03Rik	101.975	0.344928	0.707284	0.48768	0.625777	0.917648
1500011H22Rik	676.455	-0.238813	0.385001	-0.620291	0.535066	0.883457
1500011K16Rik	277.054	0.114543	0.738765	0.155046	0.876785	0.977163
1500012F01Rik	1298.04	1.22503	0.589605	2.07771	0.0377356	0.33334
1500015A07Rik	41.773	-0.455469	0.936642	-0.486278	0.62677	0.917648
1500031L02Rik	164.941	-0.235643	0.678024	-0.347544	0.728183	0.943711
1500032L24Rik	857.999	-0.0734795	0.368983	-0.199141	0.842153	0.973264
1520402A15Rik	51.4656	1.83762	1.30188	1.41152	0.158092	0.625715
1600002H07Rik	443.276	-0.0744858	0.394757	-0.188688	0.850337	0.974192
1600002K03Rik	69.7906	-0.205751	0.777226	-0.264725	0.791221	0.960753
1600012F09Rik	824.6	0.0588788	0.456634	0.128941	0.897404	0.981345
1600012H06Rik	765.37	0.129928	0.403907	0.321678	0.747697	0.949341
1600014C10Rik	450.367	0.695918	0.474313	1.46721	0.142319	0.602698
1600016N20Rik	54.1242	0.105004	1.01601	0.103349	0.917686	0.982422
1600020E01Rik	74.557	0.6766	1.04617	0.64674	0.5178	0.872829
1600027N09Rik	189.131	-0.262993	0.694319	-0.378779	0.704852	0.939567
1600029D21Rik	4.1921	-3.27806	3.3963	-0.965186	0.334452	NA
1600029O15Rik	5.29784	-1.83911	3.05816	-0.601379	0.547588	NA
1700001C19Rik	9.02755	2.51562	1.96843	1.27798	0.201255	NA
1700001F09Rik	3.25675	-5.30668	4.803	-1.10487	0.269217	NA
1700001G11Rik	10.008	-0.0975548	1.63193	-0.0597788	0.952332	NA
1700001G17Rik	6.72671	-0.44846	2.00072	-0.224149	0.822641	NA
1700001J03Rik	4.01242	2.79015	3.45325	0.807977	0.419104	NA
1700001J11Rik	12.113	1.47639	1.59935	0.923118	0.355946	NA
1700001K19Rik	3.16704	1.36435	3.72478	0.36629	0.714149	NA
1700001L05Rik	45.8268	0.852569	1.10904	0.768747	0.442044	0.842598
1700001L19Rik	5.30725	2.58009	2.94224	0.876913	0.380534	NA
1700001O22Rik	2.45169	4.61125	4.80474	0.959728	0.337192	NA
1700003E16Rik	12.1259	2.99798	1.66756	1.79782	0.0722052	NA
1700003F12Rik	32.5873	4.75328	2.14375	2.21728	0.0266042	0.278167
1700003M07Rik	12.2521	-0.524726	1.52761	-0.343495	0.731226	NA
1700007I08Rik	2.57302	4.68192	4.80379	0.974631	0.329744	NA
1700007J10Rik	14.3927	-1.09941	1.45465	-0.755791	0.449774	0.846045
1700007L15Rik	18.716	0.0967463	1.28089	0.0755307	0.939792	0.986122
1700007P06Rik	8.42465	1.74272	1.93122	0.902393	0.366848	NA
1700008J07Rik	97.849	-0.875964	0.906963	-0.965821	0.334134	0.78222
1700009P17Rik	24.6354	2.7629	1.32875	2.07932	0.0375875	0.332762
1700010B08Rik	2.96713	-0.643517	2.78152	-0.231354	0.817039	NA
1700010I02Rik	2.74689	-1.3522	3.65819	-0.369638	0.711653	NA
1700010I14Rik	2.48491	4.63489	4.80442	0.964714	0.334688	NA
1700011J10Rik	55.6889	1.07173	0.85445	1.25429	0.209738	0.682709
1700012A16Rik	6.80296	-0.368489	1.91317	-0.192606	0.847267	NA
1700012B09Rik	8.84695	-5.12	3.91464	-1.30791	0.190904	NA
1700012B15Rik	74.6207	0.641717	0.76894	0.834548	0.403972	0.821853
1700012D01Rik	5.64197	1.99713	2.24003	0.891564	0.372627	NA
1700012L04Rik	2.9576	1.22988	3.554	0.346055	0.729301	NA
1700013F07Rik	3.75501	3.60537	3.3575	1.07382	0.282902	NA
1700013G23Rik	4.25719	0.72581	2.40547	0.301733	0.762856	NA
1700016C15Rik	121.094	-4.78393	1.95226	-2.45045	0.0142676	0.195337
1700016D06Rik	10.0244	0.0796249	1.64804	0.048315	0.961465	NA
1700016K19Rik	2.22228	1.7711	4.71265	0.375819	0.707052	NA
1700017B05Rik	968.298	-0.631086	0.349752	-1.80438	0.0711713	0.443891
1700018A04Rik	12.0511	-0.0626268	1.90046	-0.0329535	0.973712	NA
1700018B08Rik	2.26054	4.49373	4.80644	0.93494	0.349819	NA
1700018L02Rik	3.44401	5.09956	4.45146	1.14559	0.251964	NA
1700019E19Rik	435.421	0.26076	0.45873	0.568439	0.569737	0.9004
1700019G17Rik	61.5034	0.735023	1.49063	0.493095	0.621946	0.916907
1700019L03Rik	37.3991	-0.618359	1.09314	-0.565672	0.571617	0.900417
1700020D05Rik	12.0195	2.98639	1.68796	1.76923	0.0768555	NA
1700020I14Rik	440.855	-0.640788	0.454233	-1.4107	0.158333	0.62574
1700020L24Rik	98.7004	2.32944	1.1769	1.9793	0.0477821	0.368121
1700020O03Rik	676.901	1.22661	0.499192	2.45718	0.0140033	0.19344
1700021C14Rik	31.0999	0.671642	1.05021	0.639531	0.522478	0.875501
1700021F05Rik	322.396	-0.128205	0.539049	-0.237835	0.812009	0.967199
1700021K19Rik	869.734	-0.102654	0.350484	-0.292892	0.769605	0.955856
1700023F06Rik	3.29997	-0.413863	2.63121	-0.15729	0.875016	NA
1700024F13Rik	24.2875	0.820003	1.20993	0.677728	0.497944	0.864508
1700025G04Rik	313.252	-1.74863	1.01694	-1.71951	0.0855223	0.485466
1700025K23Rik	16.6138	0.53544	1.42128	0.37673	0.706374	0.939567
1700025N23Rik	28.7681	0.653039	1.11946	0.583351	0.559657	0.895985
1700026L06Rik	16.5014	-1.31234	2.126	-0.617281	0.537049	0.884168
1700027D21Rik	6.17882	2.16077	2.57768	0.83826	0.401885	NA
1700028J19Rik	5.49127	-3.49134	2.35069	-1.48524	0.13748	NA
1700028K03Rik	19.7125	0.515082	1.25341	0.410947	0.681112	0.932296
1700029F09Rik	684.104	-0.582179	0.412883	-1.41003	0.15853	0.625763
1700029G01Rik	69.0409	0.498086	1.71846	0.289844	0.771936	0.955856
1700029I01Rik	18.8129	-0.994998	1.75318	-0.56754	0.570347	0.9004
1700029J07Rik	42.7955	3.13767	1.05813	2.96529	0.00302397	0.0715106
1700030C10Rik	161.569	-0.0487864	1.10451	-0.0441702	0.964769	0.992447
1700030J22Rik	23.3699	1.62665	1.45112	1.12096	0.262305	0.728851
1700030K09Rik	257.66	0.492955	0.532586	0.925586	0.354661	0.792451
1700034F02Rik	4.83023	1.91382	3.07723	0.621931	0.533987	NA
1700034H14Rik	334.582	-1.19377	0.556838	-2.14383	0.0320465	0.307205
1700034H15Rik	7.88317	0.676986	1.84212	0.367505	0.713243	NA
1700034P13Rik	2.48679	2.93629	3.70858	0.791758	0.428502	NA
1700037C18Rik	21.8793	0.32764	1.46907	0.223026	0.823515	0.969692
1700037H04Rik	1345.97	0.0924385	0.529476	0.174585	0.861406	0.974697
1700040I03Rik	112.913	-0.41623	0.662822	-0.627966	0.530026	0.879851
1700047I17Rik2	1020.93	-0.0769489	0.377081	-0.204065	0.838303	0.973261
1700048O20Rik	19.9524	-0.816253	1.39054	-0.587003	0.557202	0.895233
1700049G17Rik	114.692	0.580099	0.708057	0.819282	0.412625	0.826792
1700052K11Rik	47.3014	0.0284955	1.03336	0.0275756	0.978001	0.995627
1700052N19Rik	424.978	-0.178128	0.465299	-0.382825	0.70185	0.938699
1700054N08Rik	137.151	0.0921946	0.838202	0.109991	0.912417	0.982422
1700056E22Rik	19.5073	-0.187354	1.81858	-0.103022	0.917945	0.982422
1700063D05Rik	150.233	-0.106164	0.823337	-0.128944	0.897402	0.981345
1700065D16Rik	3.43277	0.625308	3.58766	0.174294	0.861634	NA
1700066B19Rik	6.76093	-4.76597	2.86612	-1.66287	0.0963392	NA
1700066J24Rik	8.06498	3.1794	2.01761	1.57582	0.115067	NA
1700066M21Rik	280.5	-0.447769	0.478578	-0.935625	0.349467	0.789021
1700081L11Rik	1610.85	0.217418	0.34882	0.623296	0.53309	0.882088
1700084E18Rik	7.4512	1.15531	2.2199	0.520433	0.602762	NA
1700086O06Rik	81.1088	-0.00465481	0.994677	-0.00467972	0.996266	0.999135
1700088E04Rik	4.46147	2.83598	3.57782	0.792656	0.427979	NA
1700092M07Rik	7.52164	0.0403825	1.97529	0.0204439	0.983689	NA
1700094D03Rik	106.204	0.0576977	0.6507	0.0886703	0.929344	0.98472
1700096K18Rik	20.689	0.757071	1.29351	0.585284	0.558357	0.895233
1700101E01Rik	6.4055	-0.872651	3.05208	-0.28592	0.774939	NA
1700102H20Rik	5.93385	-1.19282	2.02598	-0.58876	0.556022	NA
1700102P08Rik	5.12796	2.43021	2.28548	1.06333	0.287634	NA
1700106N22Rik	90.2836	1.14818	0.921357	1.24618	0.212699	0.68674
1700108F19Rik	3.72443	-4.03775	3.25289	-1.24128	0.214502	NA
1700109H08Rik	12.7378	0.145214	1.56992	0.0924981	0.926302	NA
1700113A16Rik	98.5374	0.74691	0.741253	1.00763	0.313631	0.772608
1700113I22Rik	30.8006	-0.112829	1.1012	-0.10246	0.918392	0.982422
1700120K04Rik	4.00599	2.66877	2.61519	1.02049	0.307497	NA
1700123M08Rik	15.6437	1.07235	1.46384	0.732555	0.46383	0.852639
1700123O12Rik	2.98749	-0.787938	2.58577	-0.304721	0.760579	NA
1700123O20Rik	496.01	-0.326776	0.414609	-0.788153	0.430607	0.838192
1700128F08Rik	13.9166	0.572626	1.50987	0.379255	0.704498	0.939485
1810006K21Rik	1162	0.0465258	0.522089	0.0891146	0.928991	0.98472
1810007C17Rik	3.04691	-2.77565	4.71536	-0.588639	0.556103	NA
1810008A18Rik	818.214	-0.591312	0.457274	-1.29312	0.195968	0.670371
1810008I18Rik	3.23326	-2.86058	3.45576	-0.827772	0.4078	NA
1810009A15Rik	1668.65	-0.441569	0.627675	-0.703499	0.481745	0.856824
1810010H24Rik	5.63159	2.59097	2.21356	1.1705	0.241799	NA
1810011O10Rik	72.4905	-4.32595	0.897304	-4.82105	1.42805e-06	0.000179993
1810012P15Rik	221.174	0.528011	0.625594	0.844015	0.398661	0.818697
1810013D10Rik	364.944	0.229467	0.453552	0.505934	0.612903	0.914892
1810013L24Rik	985.303	-0.0830852	0.434557	-0.191195	0.848373	0.974192
1810014B01Rik	97.0871	0.0541292	0.758244	0.0713876	0.943089	0.987203
1810014F10Rik	22.2028	-1.52264	1.38897	-1.09624	0.272973	0.739011
1810019D21Rik	170.79	-0.288055	0.615408	-0.468072	0.639733	0.92116
1810020D17Rik	102.435	0.851371	0.707907	1.20266	0.229108	0.702552
1810020O05Rik	7.97515	-3.66672	3.92897	-0.933253	0.35069	NA
1810021B22Rik	8.78322	1.90492	1.87063	1.01833	0.308522	NA
1810022K09Rik	712.641	-0.170295	0.516233	-0.329881	0.74149	0.94718
1810026B05Rik	141.459	0.639049	0.625303	1.02198	0.306789	0.768083
1810026J23Rik	745.413	-0.17358	0.362952	-0.478244	0.632477	0.91957
1810027O10Rik	296.974	0.254465	0.456559	0.557355	0.577285	0.902385
1810029B16Rik	590.98	-0.00479064	0.525305	-0.00911973	0.992724	0.998321
1810030N24Rik	98.2542	0.936741	0.698761	1.34057	0.180059	0.648618
1810030O07Rik	726.026	0.115658	0.36135	0.320072	0.748914	0.949341
1810031K17Rik	806.278	0.236714	0.484661	0.488411	0.625259	0.917256
1810032O08Rik	223.661	0.101148	0.482598	0.209592	0.833986	0.973074
1810034E14Rik	12.0194	-0.799875	1.97261	-0.405491	0.685117	NA
1810035I16Rik	7.59622	-0.285078	1.86163	-0.153133	0.878293	NA
1810035L17Rik	595.716	-0.398629	0.405518	-0.983012	0.325602	0.779676
1810037I17Rik	1635.56	0.0217416	0.389774	0.0557799	0.955517	0.990005
1810043G02Rik	201.735	0.254169	0.657005	0.38686	0.69886	0.938529
1810043H04Rik	143.491	-0.234823	0.679011	-0.345832	0.729469	0.943711
1810044D09Rik	33.9668	1.22733	1.20389	1.01947	0.307979	0.769087
1810046J19Rik	499.624	0.0220787	0.435986	0.0506407	0.959612	0.991575
1810048J11Rik	719.243	1.00178	0.46733	2.14363	0.0320623	0.307205
1810049H13Rik	43.4698	0.257757	1.00355	0.256847	0.797297	0.961696
1810055G02Rik	1429.77	-0.0717643	0.445648	-0.161034	0.872067	0.976227
1810058I24Rik	609.483	0.315548	0.595122	0.530224	0.595957	0.909487
1810062G17Rik	18.8888	-0.212534	1.46997	-0.144584	0.88504	0.978625
1810063B05Rik	248.877	0.175602	0.518561	0.338634	0.734885	0.945059
1810063B07Rik	94.218	0.441627	0.984161	0.448734	0.653623	0.923875
1810064F22Rik	35.3762	0.6658	1.04787	0.635387	0.525176	0.87656
1810074P20Rik	293.754	0.101687	0.631183	0.161106	0.87201	0.976227
2010001E11Rik	8.66102	0.5434	1.83968	0.295378	0.767705	NA
2010001M06Rik	8.73543	2.36364	2.105	1.12287	0.261494	NA
2010002M12Rik	11.7742	0.294831	1.64391	0.179347	0.857665	NA
2010002N04Rik	595.417	-0.611242	0.69847	-0.875116	0.381511	0.80838
2010003K11Rik	7.00615	-0.126383	2.0042	-0.0630589	0.94972	NA
2010003O02Rik	24.6208	0.0162464	1.13846	0.0142705	0.988614	0.997809
2010011I20Rik	252.705	0.068681	0.724709	0.0947704	0.924497	0.982933
2010012O05Rik	72.3678	-0.0138797	0.855986	-0.0162149	0.987063	0.997625
2010015L04Rik	61.3548	0.019318	0.843221	0.0229097	0.981722	0.996377
2010106G01Rik	2047.42	0.475705	0.486486	0.977839	0.328154	0.780699
2010107E04Rik	994.552	-0.222742	0.393123	-0.566596	0.570989	0.900417
2010107G12Rik	2.83748	-0.272694	2.77013	-0.098441	0.921582	NA
2010107G23Rik	47.5577	1.20976	1.46493	0.825814	0.408909	0.823078
2010107H07Rik	80.9724	-0.12367	0.961508	-0.128621	0.897658	0.981379
2010109K11Rik	125.262	-1.8976	1.50903	-1.2575	0.208572	0.682709
2010111I01Rik	149.722	1.56105	0.949671	1.64378	0.100222	0.517822
2010204K13Rik	412.689	-0.0903959	0.512389	-0.17642	0.859964	0.974697
2010300C02Rik	1158.74	2.80474	1.50146	1.86801	0.0617606	0.419026
2010305A19Rik	236.83	-0.225232	0.777466	-0.2897	0.772046	0.955856
2010317E24Rik	378.297	-0.825449	0.814416	-1.01355	0.310799	0.770735
2010320M18Rik	104.686	0.643006	0.828148	0.776438	0.43749	0.8401
2010321M09Rik	932.061	0.0745172	0.373809	0.199345	0.841993	0.973261
2200002D01Rik	1665.75	-0.885408	0.468117	-1.89142	0.0585679	0.410882
2200002K05Rik	476.215	-1.2987	0.791726	-1.64034	0.100934	0.519149
2210009G21Rik	166.319	0.24254	0.544155	0.445718	0.655801	0.923925
2210010C17Rik	23.9836	-5.85444	2.0627	-2.83824	0.00453636	0.0961204
2210012G02Rik	284.58	0.422209	0.478498	0.882362	0.377581	0.805854
2210013O21Rik	194.81	1.0938	0.638788	1.7123	0.0868417	0.488773
2210015D19Rik	89.5537	-0.0240227	0.88453	-0.0271587	0.978333	0.995763
2210016F16Rik	213.722	-0.94317	1.5613	-0.604094	0.545781	0.889493
2210016L21Rik	640.831	0.236416	0.363844	0.649774	0.515838	0.872463
2210018M11Rik	830.08	-0.633296	0.387612	-1.63384	0.102293	0.522622
2210019I11Rik	24.5618	1.22695	2.17431	0.564293	0.572555	0.90056
2210020M01Rik	3.86658	0.900857	2.38427	0.377833	0.705554	NA
2210021J22Rik	125.591	0.37491	0.634723	0.590666	0.554744	0.894657
2210039B01Rik	331.227	-0.881081	0.635153	-1.38719	0.165382	0.635855
2210403K04Rik	78.7822	0.63447	0.871805	0.727765	0.466757	0.853256
2210404J11Rik	177.169	1.14862	0.542688	2.11654	0.0342988	0.317199
2210404O07Rik	6.09845	2.32713	2.7956	0.832427	0.405168	NA
2210404O09Rik	159.113	0.15549	0.603153	0.257795	0.796565	0.961431
2210408F21Rik	26.0949	1.60305	1.58429	1.01184	0.311615	0.771216
2210408I21Rik	65.1784	0.465562	0.91786	0.507225	0.611997	0.914716
2210411K11Rik	352.059	-0.565999	0.592816	-0.954764	0.339697	0.783866
2210417A02Rik	8.74935	0.0196865	1.91854	0.0102612	0.991813	NA
2210417K05Rik	11.5293	1.7432	1.64177	1.06178	0.288336	NA
2210420H20Rik	2.66153	1.81969	3.6376	0.500246	0.616902	NA
2300009A05Rik	102.851	0.943051	0.719658	1.31042	0.190055	0.662461
2310001A20Rik	468.658	0.179695	0.570374	0.315047	0.752726	0.950662
2310001H17Rik	16.7196	2.66982	2.33849	1.14168	0.253586	0.722488
2310002J15Rik	6.98244	-2.13652	2.07979	-1.02728	0.304289	NA
2310002L13Rik	180.217	1.2678	1.94077	0.653247	0.513597	0.872283
2310003C23Rik	737.597	0.0632552	0.495266	0.12772	0.898371	0.981389
2310003F16Rik	1670.02	-0.395282	0.402439	-0.982216	0.325994	0.779676
2310003H01Rik	261.542	-0.378703	0.571225	-0.662967	0.507351	0.869085
2310003L22Rik	265.103	0.587468	0.555996	1.0566	0.290692	0.75509
2310004I24Rik	155.564	0.441806	0.560576	0.788129	0.430621	0.838192
2310004N24Rik	298.392	-0.46395	0.56343	-0.823439	0.410258	0.824292
2310005A03Rik	4.84618	-0.673376	2.22655	-0.30243	0.762324	NA
2310007B03Rik	138.161	-8.26864	1.70449	-4.8511	1.22776e-06	0.000161405
2310008H04Rik	470.678	0.623033	0.486833	1.27977	0.200627	0.674629
2310008H09Rik	2256.76	-1.05753	0.541572	-1.95271	0.0508538	0.383183
2310009A05Rik	87.8691	0.655516	0.801302	0.818064	0.413321	0.826912
2310009B15Rik	157.694	0.0901067	0.958325	0.0940253	0.925089	0.983097
2310010J17Rik	9.16447	0.532443	1.72204	0.309193	0.757175	NA
2310010M20Rik	5.77639	1.08422	2.08844	0.519153	0.603654	NA
2310011J03Rik	315.052	-0.0289712	0.523566	-0.0553343	0.955872	0.990005
2310014L17Rik	61.7378	-0.294524	0.917857	-0.320882	0.7483	0.949341
2310015A10Rik	51.8304	0.889261	0.843546	1.05419	0.291794	0.756302
2310015B20Rik	3.04194	3.26603	3.74346	0.872464	0.382956	NA
2310016M24Rik	797.693	0.771893	0.41997	1.83797	0.0660668	0.43168
2310021P13Rik	1965.33	0.184965	0.434848	0.425355	0.670578	0.927723
2310022A10Rik	443.477	-0.402031	0.472365	-0.851103	0.394712	0.816973
2310022B05Rik	2009.84	0.398059	0.347999	1.14385	0.252685	0.72231
2310028H24Rik	68.4123	1.69066	0.834476	2.02601	0.0427638	0.348422
2310030G06Rik	24.3283	-0.690679	1.39067	-0.496653	0.619434	0.916076
2310030N02Rik	130.898	0.0275205	0.636719	0.0432223	0.965524	0.992447
2310033P09Rik	319.869	-0.460677	0.661166	-0.696764	0.48595	0.859744
2310034G01Rik	33.176	1.52074	2.18357	0.696445	0.48615	0.859782
2310034O05Rik	3.09013	0.465147	2.83589	0.164021	0.869714	NA
2310035C23Rik	539.869	0.0512476	0.461469	0.111053	0.911574	0.982407
2310035K24Rik	162.033	0.716937	0.71291	1.00565	0.314585	0.772697
2310036O22Rik	2720.32	0.0533546	0.387216	0.13779	0.890406	0.980651
2310037I24Rik	2235.52	-0.402505	0.320514	-1.25581	0.209184	0.682709
2310039H08Rik	397.817	0.397573	0.477163	0.833202	0.404731	0.821853
2310039L15Rik	42.7939	0.608841	0.923191	0.659496	0.509577	0.870631
2310040G24Rik	22.5181	-1.16107	1.5522	-0.748017	0.45445	0.848649
2310042D19Rik	25.7944	0.778723	1.38707	0.561414	0.574515	0.901496
2310043J07Rik	12.8843	-3.16094	1.72526	-1.83216	0.0669283	NA
2310044G17Rik	655.511	-0.33794	0.41132	-0.821599	0.411305	0.825717
2310044H10Rik	1428.88	-0.141767	0.437321	-0.324172	0.745808	0.948533
2310045N01Rik	317.699	0.395099	0.491024	0.804642	0.421026	0.831498
2310046K01Rik	96.5284	3.55565	1.35498	2.62413	0.00868715	0.146006
2310046O06Rik	208.955	-0.115279	0.507191	-0.227289	0.820199	0.969426
2310047B19Rik	124.743	0.124328	0.591102	0.210332	0.833408	0.973074
2310047M10Rik	149.96	1.1154	0.662105	1.68462	0.0920621	0.499801
2310057M21Rik	324.446	-0.39896	0.448124	-0.89029	0.37331	0.803427
2310061C15Rik	436.65	-0.392938	0.714245	-0.550144	0.582221	0.903994
2310061I04Rik	1091.12	0.24507	0.426475	0.574642	0.565534	0.898405
2310061J03Rik	9.25258	0.551968	1.82337	0.302718	0.762104	NA
2310067B10Rik	1423.2	-0.475771	0.568144	-0.837411	0.402361	0.821853
2310068J16Rik	8.60658	-0.559536	1.73884	-0.321786	0.747615	NA
2310079F23Rik	227.122	0.0720755	0.511628	0.140875	0.887969	0.980191
2400001E08Rik	1151.18	0.324347	0.332381	0.975827	0.32915	0.781451
2400003C14Rik	1481.83	-0.303706	0.367205	-0.827075	0.408195	0.823078
2400009B08Rik	7.49961	-0.297678	1.95492	-0.152271	0.878973	NA
2410001C21Rik	1159.83	0.200187	0.429784	0.465785	0.64137	0.92116
2410002F23Rik	1106.04	-0.368446	0.39716	-0.927701	0.353563	0.791481
2410002I01Rik	272.322	0.142782	0.459997	0.310399	0.756258	0.951725
2410002O22Rik	905.926	-0.356252	0.518322	-0.687319	0.491882	0.861415
2410003K15Rik	265.258	-0.198678	0.495994	-0.400566	0.68874	0.934162
2410004B18Rik	324.392	-0.327604	0.647669	-0.505821	0.612983	0.914892
2410004N09Rik	215.992	0.257041	0.699185	0.367629	0.71315	0.941208
2410004P03Rik	9.14841	-1.20366	1.75926	-0.684188	0.493857	NA
2410006H16Rik	1499.34	1.99771	0.718027	2.78222	0.0053989	0.108313
2410007B07Rik	7.1283	-0.133792	2.09102	-0.0639841	0.948983	NA
2410015M20Rik	829.608	0.340562	0.38452	0.885681	0.375789	0.804905
2410016O06Rik	432.995	-0.502181	0.525822	-0.955039	0.339558	0.783866
2410017P09Rik	143.528	-0.690654	0.64358	-1.07314	0.283207	0.747694
2410018L13Rik	37.3918	-0.138249	1.17787	-0.117372	0.906565	0.981811
2410018M08Rik	70.6495	0.039822	0.814183	0.0489103	0.960991	0.991985
2410021H03Rik	4.33424	-0.759325	2.4338	-0.311991	0.755047	NA
2410022L05Rik	295.677	0.558176	0.60096	0.928806	0.352989	0.791287
2410042D21Rik	1255.4	0.0814967	0.479545	0.169946	0.865053	0.975544
2410066E13Rik	19.4894	1.43516	1.33983	1.07115	0.284102	0.748585
2410075B13Rik	7.67289	3.03353	2.38532	1.27175	0.203463	NA
2410076I21Rik	28.5672	-2.97585	1.47193	-2.02173	0.0432044	0.350045
2410088K16Rik	3.39325	-2.71216	2.65957	-1.01977	0.307836	NA
2410089E03Rik	1654.01	0.309659	0.424683	0.729154	0.465907	0.853105
2410091C18Rik	772.463	0.438491	0.378837	1.15747	0.247082	0.715637
2410114N07Rik	2.86742	1.36529	2.71537	0.502803	0.615103	NA
2410124H12Rik	5.46014	1.74166	4.32497	0.402699	0.68717	NA
2410127L17Rik	2122.24	-0.0614717	0.545492	-0.11269	0.910276	0.982407
2410131K14Rik	270.903	0.3762	0.452912	0.830626	0.406185	0.822052
2500003M10Rik	2568.2	-0.276391	0.320936	-0.861204	0.389126	0.812735
2500004C02Rik	864.258	0.0740426	0.770104	0.0961462	0.923404	0.98252
2510002D24Rik	134.197	0.136555	0.619927	0.220276	0.825656	0.970821
2510003E04Rik	483.107	-0.489925	0.563434	-0.869534	0.384555	0.809541
2510006D16Rik	571.834	0.280723	0.421982	0.665249	0.505892	0.868574
2510009E07Rik	7.38325	3.76339	3.99121	0.94292	0.345722	NA
2510012J08Rik	971.735	-0.396791	0.384194	-1.03279	0.301704	0.765436
2510039O18Rik	750.589	-0.430997	0.432623	-0.99624	0.319133	0.774089
2510049J12Rik	14.821	1.2979	1.48439	0.874367	0.381918	0.808577
2610001J05Rik	835.81	0.208637	0.686852	0.303758	0.761312	0.953526
2610002D18Rik	186.473	-0.717557	0.760253	-0.94384	0.345251	0.787036
2610002I17Rik	179.01	0.336643	0.608035	0.553658	0.579813	0.903793
2610002J02Rik	354.851	0.688689	0.429459	1.60362	0.108798	0.540591
2610002M06Rik	326.668	0.196782	0.561005	0.350768	0.725763	0.943481
2610005L07Rik	493.197	1.00955	0.629581	1.60353	0.108817	0.540591
2610008E11Rik	101.355	0.719872	0.736432	0.977513	0.328315	0.780778
2610015P09Rik	142.496	0.342286	0.584225	0.58588	0.557956	0.895233
2610019E17Rik	80.7469	0.314023	0.914229	0.343484	0.731235	0.944268
2610019F03Rik	290.863	0.455672	0.712106	0.639893	0.522242	0.875501
2610020C07Rik	22.1159	-0.746152	1.23211	-0.605591	0.544786	0.888988
2610020H08Rik	72.9438	0.434729	0.777156	0.559385	0.575899	0.901833
2610021K21Rik	77.5795	0.221665	0.839249	0.264123	0.791686	0.960753
2610027L16Rik	1025.48	-0.91585	0.512136	-1.78829	0.0737288	0.451543
2610029G23Rik	1184.86	0.359374	0.798235	0.45021	0.652559	0.923875
2610029I01Rik	99.64	0.7602	0.691321	1.09963	0.271492	0.737285
2610034B18Rik	1111.45	0.00488615	0.463731	0.0105366	0.991593	0.998321
2610035D17Rik	48.6726	-1.16964	1.05436	-1.10933	0.267288	0.734022
2610035F20Rik	3.61726	2.37399	3.28668	0.722307	0.470106	NA
2610037D02Rik	15.1839	-0.12772	1.53336	-0.0832942	0.933618	0.985645
2610039C10Rik	336.757	-0.520852	0.658737	-0.790683	0.429129	0.838192
2610044O15Rik	303.04	0.473896	0.452712	1.04679	0.295195	0.759517
2610101N10Rik	2451.3	-0.372085	0.313502	-1.18687	0.235281	0.707915
2610109H07Rik	12.0903	0.789981	2.58941	0.305081	0.760304	NA
2610203C20Rik	973.328	0.258404	0.486917	0.530694	0.595631	0.909487
2610204G22Rik	3.29481	1.5481	2.60516	0.594244	0.552349	NA
2610206C17Rik	7.64505	0.881479	1.84137	0.478707	0.632147	NA
2610301B20Rik	102.273	0.759475	1.03759	0.73196	0.464193	0.852639
2610301G19Rik	729.004	-0.504373	0.479339	-1.05223	0.292696	0.757412
2610305D13Rik	94.9032	-5.36118	2.12285	-2.52546	0.0115546	0.174636
2610306M01Rik	45.3998	0.248955	1.04383	0.238502	0.811492	0.967147
2610307P16Rik	14.0507	-2.7508	1.78004	-1.54535	0.122261	0.569375
2610318N02Rik	91.5106	-1.67944	1.38539	-1.21226	0.225414	0.699291
2610507B11Rik	12238.4	-0.0639852	0.42412	-0.150866	0.880082	0.977993
2610507I01Rik	314.116	0.446402	0.446206	1.00044	0.317098	0.773524
2610524H06Rik	215.149	0.531625	0.750283	0.708567	0.478593	0.855266
2610528A11Rik	20.5674	6.24435	2.36415	2.64127	0.00825959	0.141431
2610528E23Rik	347.431	0.167125	0.660763	0.252928	0.800324	0.963636
2700007P21Rik	970.164	0.751956	0.639706	1.17547	0.239806	0.71051
2700023E23Rik	192.712	-0.497868	0.589141	-0.845074	0.39807	0.818581
2700029M09Rik	774.286	-0.445363	0.59882	-0.743734	0.457038	0.850366
2700038G22Rik	238.962	0.26762	0.835388	0.320354	0.7487	0.949341
2700046G09Rik	21.3913	1.70843	1.3352	1.27953	0.200711	0.674629
2700049A03Rik	494.538	-0.285264	0.432659	-0.659327	0.509686	0.870631
2700050L05Rik	440.945	-0.625135	0.404049	-1.54717	0.121821	0.568756
2700054A10Rik	234.109	0.589427	0.722882	0.815385	0.414852	0.827929
2700060E02Rik	1787.25	-0.248273	0.439404	-0.565023	0.572058	0.900455
2700062C07Rik	99.6001	-1.71112	0.991843	-1.7252	0.0844922	0.484049
2700069I18Rik	4.01096	-1.40544	2.65102	-0.53015	0.596008	NA
2700070H01Rik	4.3889	0.341701	2.25088	0.151808	0.879339	NA
2700078E11Rik	3041.27	-0.379088	0.422854	-0.896498	0.369987	0.800673
2700081O15Rik	969.127	0.745184	0.652255	1.14247	0.253257	0.722488
2700089E24Rik	2107.98	0.278299	0.705138	0.394674	0.693084	0.9359
2700094K13Rik	739.828	-0.436534	0.68812	-0.634386	0.525829	0.877081
2700097O09Rik	143.455	0.171705	0.582931	0.294556	0.768333	0.955808
2700099C18Rik	161.483	0.240586	0.684781	0.351333	0.725339	0.943481
2810001G20Rik	74.819	1.11932	0.866779	1.29136	0.19658	0.670626
2810002D19Rik	149.979	0.636344	0.668315	0.952161	0.341015	0.783866
2810002N01Rik	409.531	0.127652	0.428515	0.297895	0.765783	0.954832
2810004N23Rik	1368.84	0.276586	0.332987	0.830621	0.406188	0.822052
2810006K23Rik	318.102	0.60646	0.477242	1.27076	0.203814	0.678205
2810008D09Rik	181.746	0.938396	0.601073	1.5612	0.118477	0.560426
2810008M24Rik	1789.81	-1.61175	0.556624	-2.89559	0.00378451	0.0844332
2810013P06Rik	193.101	0.103179	0.581469	0.177445	0.859159	0.974666
2810021B07Rik	357.02	-0.197353	0.567681	-0.347648	0.728104	0.943711
2810021J22Rik	147.72	1.11048	0.902971	1.22981	0.218768	0.692788
2810025M15Rik	324.694	0.836118	0.47691	1.7532	0.079568	0.47179
2810029C07Rik	23.0164	1.94587	1.31986	1.47431	0.140399	0.599763
2810030E01Rik	54.7265	-1.91401	0.899285	-2.12837	0.0333065	0.313235
2810046L04Rik	576.923	-0.511155	0.381547	-1.33969	0.180346	0.649224
2810047C21Rik1	22.6496	0.184303	1.90151	0.0969246	0.922786	0.982422
2810055F11Rik	62.9393	0.343007	1.68135	0.204007	0.838348	0.973261
2810055G20Rik	1.9713	2.69743	4.80687	0.561163	0.574687	NA
2810403A07Rik	1154.35	-0.543173	0.363368	-1.49483	0.134959	0.591824
2810403D21Rik	6.6958	2.72781	2.73954	0.995719	0.319387	NA
2810405K02Rik	16.8204	-0.392828	2.56654	-0.153057	0.878353	0.977292
2810407C02Rik	4293.75	-0.911244	0.30249	-3.01248	0.00259127	0.0653468
2810408A11Rik	46.5935	0.100569	1.36359	0.073753	0.941207	0.986508
2810408I11Rik	161.153	-0.161959	0.80407	-0.201424	0.840367	0.973261
2810408M09Rik	300.915	-0.337977	0.528722	-0.639234	0.522671	0.875501
2810410L24Rik	24.0992	-0.452551	1.26181	-0.358651	0.719856	0.942217
2810417H13Rik	2406.44	-0.475805	0.864156	-0.550601	0.581907	0.903994
2810422J05Rik	522.772	0.777828	0.387064	2.00956	0.0444781	0.355185
2810422O20Rik	141.18	0.323735	0.634856	0.509934	0.610097	0.914548
2810428I15Rik	525.156	0.208868	0.472004	0.442513	0.658118	0.924384
2810429I04Rik	6.01571	-0.936787	2.17254	-0.431194	0.666327	NA
2810432D09Rik	165.072	-0.0380969	0.569603	-0.0668833	0.946675	0.987964
2810432L12Rik	198.324	3.36177	1.26229	2.66322	0.00773957	0.135564
2810442I21Rik	12.2293	0.671217	1.79096	0.37478	0.707824	NA
2810453I06Rik	594.832	0.235338	0.420339	0.559878	0.575563	0.901833
2810454H06Rik	11.099	0.130532	1.63651	0.0797626	0.936426	NA
2810468N07Rik	2.5331	0.607349	4.65651	0.13043	0.896226	NA
2810474O19Rik	1774.65	0.729127	0.504179	1.44617	0.14813	0.611999
2900002K06Rik	12.8854	0.323479	1.48403	0.217973	0.82745	NA
2900005J15Rik	25.2314	7.97553	3.85533	2.0687	0.0385741	0.335626
2900006K08Rik	12.5362	2.34057	1.81986	1.28612	0.1984	NA
2900008C10Rik	2.3536	2.98593	4.80173	0.621844	0.534044	NA
2900009J06Rik	13.9523	0.325355	1.53047	0.212585	0.831651	0.972677
2900010M23Rik	1727.78	0.249031	0.492455	0.505693	0.613072	0.914892
2900026A02Rik	1520	-1.63251	0.510648	-3.19694	0.00138895	0.0427741
2900041M22Rik	2.48491	4.63489	4.80442	0.964714	0.334688	NA
2900053A13Rik	177.073	0.159826	0.550862	0.290139	0.77171	0.955856
2900056M20Rik	245.243	1.46788	0.787986	1.86282	0.0624877	0.420691
2900064A13Rik	1202.25	-0.00208504	0.522973	-0.0039869	0.996819	0.999215
2900076A07Rik	26.318	1.22242	1.25128	0.976937	0.3286	0.781001
2900092E17Rik	640.145	-0.237818	0.397492	-0.598297	0.549642	0.891473
2900097C17Rik	4939.48	0.313385	0.482865	0.649013	0.51633	0.872463
3000002C10Rik	51.8937	0.224381	0.876484	0.256002	0.79795	0.961995
3010026O09Rik	57.5802	0.752865	0.927465	0.811745	0.416938	0.829424
3110001D03Rik	250.249	0.432426	0.550642	0.785311	0.432271	0.838928
3110001I22Rik	62.8125	-0.217011	0.807451	-0.268761	0.788114	0.959897
3110002H16Rik	552.654	-0.702272	0.569486	-1.23317	0.217513	0.691264
3110003A17Rik	529.151	-0.820778	0.44479	-1.84532	0.0649916	0.427888
3110009E18Rik	43.7357	0.105986	1.09825	0.0965044	0.92312	0.982422
3110021N24Rik	34.4393	0.91546	1.09257	0.837899	0.402087	0.821853
3110039M20Rik	338.935	-1.08154	0.755535	-1.43148	0.152291	0.620638
3110040N11Rik	153.492	-0.20238	0.673705	-0.300398	0.763874	0.954004
3110043O21Rik	286.483	0.696629	0.727045	0.958165	0.337979	0.783444
3110045C21Rik	23.714	0.594702	1.30964	0.454097	0.649759	0.922896
3110052M02Rik	51.055	0.744643	0.900787	0.826658	0.408431	0.823078
3110056K07Rik	48.941	0.287603	1.10384	0.260548	0.794441	0.960753
3110056O03Rik	317.539	-0.210763	0.615275	-0.342551	0.731936	0.944268
3110057O12Rik	28.9248	1.20346	1.12535	1.06941	0.284886	0.749606
3110062M04Rik	549.667	1.26996	0.775078	1.63849	0.101318	0.5204
3110070M22Rik	4.17653	-2.44798	2.41588	-1.01329	0.310922	NA
3110082I17Rik	457.639	0.234742	0.545093	0.430647	0.666725	0.925863
3200001D21Rik	3.53454	-1.15379	2.44344	-0.4722	0.636784	NA
3200002M19Rik	370.093	-0.419946	0.597561	-0.702768	0.482201	0.856896
3230401D17Rik	858.185	-0.25201	0.540446	-0.4663	0.641001	0.92116
3300002I08Rik	9.58895	0.0366342	2.76605	0.0132442	0.989433	NA
3300005D01Rik	115.133	-6.69865	1.66617	-4.02039	5.81023e-05	0.00383978
3830406C13Rik	183.22	0.610811	0.717883	0.85085	0.394853	0.816973
3830408C21Rik	8.7606	0.945392	1.86137	0.5079	0.611523	NA
3930402G23Rik	10.3165	-0.787474	1.95507	-0.402786	0.687105	NA
4430402I18Rik	3.42405	2.51618	3.40491	0.738987	0.459915	NA
4632411B12Rik	1375.81	0.444637	0.621604	0.715307	0.47442	0.855266
4632415K11Rik	315.739	2.22393	0.524758	4.23802	2.25502e-05	0.00179025
4632415L05Rik	239.061	0.69461	0.716388	0.9696	0.332246	0.781884
4632427E13Rik	5.26444	1.19803	2.14944	0.55737	0.577275	NA
4632428C04Rik	21.387	0.937981	1.86381	0.503261	0.614781	0.915117
4632428N05Rik	2.48032	-2.42247	3.70891	-0.65315	0.513659	NA
4632434I11Rik	292.767	-0.539219	0.644314	-0.836889	0.402655	0.821853
4732415M23Rik	6.22728	2.10257	2.8514	0.737382	0.46089	NA
4732418C07Rik	967.509	0.395644	0.386426	1.02385	0.305905	0.767348
4732471D19Rik	456.563	0.664052	0.982622	0.675796	0.49917	0.865162
4732471J01Rik	18.4301	1.6702	1.58867	1.05132	0.293112	0.757665
4732490B19Rik	3.38808	-0.354322	2.67464	-0.132474	0.894609	NA
4732491K20Rik	14.2068	1.29237	1.72272	0.750188	0.453141	0.84846
4831426I19Rik	479.851	1.33114	0.824668	1.61415	0.106494	0.533502
4831440E17Rik	14.7476	1.19109	1.59816	0.745285	0.4561	0.84992
4832428D23Rik	2.74128	-1.70198	2.79812	-0.60826	0.543015	NA
4833403I15Rik	4.09035	-0.0400599	3.55458	-0.0112699	0.991008	NA
4833417C18Rik	90.5263	0.770482	1.05949	0.727223	0.467089	0.85348
4833418N02Rik	7.46222	0.615639	1.85863	0.331232	0.740469	NA
4833419F23Rik	2.50509	2.94093	3.82514	0.768841	0.441988	NA
4833420G17Rik	598.25	0.00799765	0.409528	0.019529	0.984419	0.996895
4833422C13Rik	3.99663	-0.27739	2.31763	-0.119687	0.904731	NA
4833427F10Rik	12.2188	-1.76543	1.76352	-1.00108	0.316786	NA
4833439L19Rik	1561.99	-0.175136	0.334129	-0.524156	0.60017	0.910504
4833442J19Rik	84.5691	2.43581	0.775001	3.14298	0.00167238	0.0496274
4921506M07Rik	23.5319	1.17535	1.47954	0.794401	0.426962	0.836969
4921507L20Rik	5.94154	-0.0100104	2.02484	-0.00494378	0.996055	NA
4921507P07Rik	65.6261	0.615706	1.63766	0.375966	0.706942	0.939567
4921508A21Rik	85.6857	-0.294849	0.707974	-0.416469	0.677067	0.930196
4921513D23Rik	1595.58	0.00942472	0.356132	0.0264641	0.978887	0.995971
4921513I03Rik	10.0049	0.46431	1.72327	0.269435	0.787595	NA
4921515E04Rik	79.6207	0.97707	0.832672	1.17341	0.240629	0.710956
4921515J06Rik	6.86589	-1.47846	2.89959	-0.509887	0.610131	NA
4921517L17Rik	58.201	2.42135	1.10264	2.19596	0.0280947	0.288401
4921523A10Rik	9.38241	0.566343	1.69271	0.334577	0.737944	NA
4921524J17Rik	299.473	0.954631	0.655793	1.45569	0.145478	0.608585
4921530D09Rik	7.72445	1.66162	1.91156	0.86925	0.384711	NA
4921530L18Rik	9.6097	-0.0954974	1.82625	-0.0522914	0.958296	NA
4921531C22Rik	92.2209	-0.0910743	0.750231	-0.121395	0.903378	0.981389
4921536K21Rik	43.6392	0.568164	1.13503	0.500573	0.616672	0.915975
4922501C03Rik	532.506	0.875507	0.435219	2.01165	0.0442571	0.354115
4930402H24Rik	626.068	0.966031	0.581149	1.66228	0.0964572	0.508801
4930404I05Rik	3.35981	-0.804271	2.60179	-0.309123	0.757228	NA
4930404N11Rik	17.9014	0.997686	1.50224	0.664134	0.506605	0.868574
4930405A21Rik	7.45224	0.411809	1.86209	0.221154	0.824972	NA
4930405P13Rik	75.1152	0.278956	0.797945	0.349594	0.726644	0.943481
4930412C18Rik	9.75554	0.45791	1.94503	0.235426	0.813878	NA
4930413G21Rik	27.4961	0.217999	1.1201	0.194625	0.845687	0.974192
4930414L22Rik	30.7196	1.06011	1.1127	0.952738	0.340723	0.783866
4930415O20Rik	2.49156	1.19567	3.6952	0.323574	0.746261	NA
4930417G10Rik	3.75811	0.989669	3.32933	0.297258	0.76627	NA
4930420K17Rik	135.245	1.18064	0.737189	1.60154	0.109257	0.541757
4930422G04Rik	306.25	-0.861633	0.635409	-1.35603	0.17509	0.644344
4930427A07Rik	440.473	-0.386058	0.655427	-0.589017	0.55585	0.895233
4930429B21Rik	3.36295	0.572109	2.75692	0.207517	0.835606	NA
4930430F08Rik	253.662	0.47111	0.569006	0.827952	0.407698	0.822938
4930432J09Rik	4.08159	-1.44539	2.33108	-0.620054	0.535222	NA
4930432K21Rik	35.453	0.504482	1.1489	0.439099	0.66059	0.924611
4930441O14Rik	11.146	0.535428	1.67368	0.319911	0.749036	NA
4930444A02Rik	771.587	0.673771	0.363509	1.85352	0.0638079	0.42566
4930444G20Rik	7.03358	-0.399841	1.94648	-0.205417	0.837246	NA
4930451C15Rik	18.0073	0.60034	1.32475	0.453173	0.650424	0.922896
4930452B06Rik	10.4706	-6.99478	3.17959	-2.1999	0.0278141	NA
4930453N24Rik	391.194	-0.421019	0.553849	-0.760168	0.447154	0.844699
4930455C21Rik	415.402	0.0579448	0.512472	0.113069	0.909976	0.982407
4930455F23Rik	208.902	-0.0646357	0.656437	-0.0984644	0.921564	0.982422
4930461G14Rik	21.6208	-0.333405	1.98303	-0.168129	0.866482	0.975605
4930465K10Rik	4.34133	-0.208632	2.7521	-0.0758083	0.939572	NA
4930467E23Rik	11.8511	6.88559	4.56573	1.5081	0.131528	NA
4930470H14Rik	284.052	0.556786	0.526564	1.05739	0.290331	0.754729
4930471M23Rik	605.843	0.2817	0.397106	0.709382	0.478087	0.855266
4930473A02Rik	3.46828	-0.868447	2.65026	-0.327684	0.74315	NA
4930473A06Rik	70.8942	1.42936	0.961152	1.48713	0.13698	0.595167
4930474G06Rik	4.91766	-0.0183565	2.27487	-0.00806928	0.993562	NA
4930481A15Rik	8.75543	1.81404	1.95311	0.928796	0.352995	NA
4930483K19Rik	5.20501	0.764299	2.22543	0.343439	0.731269	NA
4930500J02Rik	4.60478	0.516299	2.20762	0.233871	0.815085	NA
4930503E14Rik	10.5683	-7.00569	3.36668	-2.08089	0.0374438	NA
4930503L19Rik	622.575	-0.686893	0.654849	-1.04893	0.294209	0.75854
4930506M07Rik	149.84	0.548016	1.96399	0.279032	0.78022	0.957969
4930507D05Rik	7.19397	-0.894297	1.88862	-0.473519	0.635843	NA
4930509E16Rik	11.4416	1.34498	1.69668	0.792712	0.427946	NA
4930511M06Rik	348.007	-0.0342124	0.437925	-0.0781239	0.93773	0.985679
4930513N10Rik	34.6741	-0.0324294	1.38209	-0.023464	0.98128	0.996357
4930515G01Rik	18.9302	0.528895	1.32497	0.399176	0.689764	0.934398
4930519F09Rik	59.037	0.1456	0.86809	0.167725	0.8668	0.97565
4930520O04Rik	4.11051	3.85366	3.17008	1.21564	0.224123	NA
4930523C07Rik	357.138	-0.913361	0.954341	-0.957059	0.338537	0.783444
4930524L23Rik	7.80566	-0.204603	1.96497	-0.104125	0.91707	NA
4930525G20Rik	12.5694	2.34732	1.88119	1.24779	0.212109	NA
4930528A17Rik	3.92125	2.6217	2.62438	0.998978	0.317805	NA
4930528D03Rik	11.1696	0.107247	1.58796	0.0675373	0.946154	NA
4930529M08Rik	3.61474	-1.72046	2.53001	-0.68002	0.496491	NA
4930534B04Rik	355.49	-0.238126	0.496887	-0.479236	0.631771	0.91957
4930539E08Rik	23.8188	0.642677	1.16658	0.550906	0.581698	0.903994
4930539J05Rik	29.6008	-0.368291	1.11946	-0.32899	0.742163	0.947743
4930547N16Rik	499.634	-0.936814	0.696021	-1.34596	0.178316	0.64802
4930550C14Rik	8.09446	1.32575	2.16197	0.613212	0.539736	NA
4930555I21Rik	3.31931	5.05128	4.67478	1.08054	0.279903	NA
4930556M19Rik	74.9332	1.48063	0.73452	2.01578	0.0438233	0.352489
4930558J18Rik	75.5627	0.525515	0.885192	0.593673	0.552731	0.893028
4930562C15Rik	121.548	0.110244	0.763116	0.144466	0.885132	0.978625
4930562F07Rik	16.0945	-0.103409	1.861	-0.0555664	0.955687	0.990005
4930563E22Rik	14.3945	1.05452	1.54422	0.682882	0.494682	0.863148
4930563M20Rik	3.16389	-0.179497	2.5957	-0.0691517	0.944869	NA
4930565N06Rik	15.8365	0.858452	1.62421	0.528536	0.597127	0.909487
4930572J05Rik	298.484	0.0781528	0.868488	0.0899873	0.928297	0.98472
4930578N16Rik	23.2583	1.74716	1.28136	1.36353	0.172717	0.643509
4930579G18Rik	35.0962	-0.537499	0.997589	-0.538798	0.590027	0.907208
4930579G22Rik	2.36546	2.85028	3.78187	0.753669	0.451048	NA
4930579G24Rik	300.057	-0.38708	0.539904	-0.716943	0.473409	0.855266
4930579K19Rik	3.9177	2.05396	3.18701	0.644478	0.519265	NA
4930581F22Rik	40.9444	1.15836	0.965593	1.19964	0.23028	0.703676
4930583H14Rik	3.76521	1.79515	2.62157	0.684762	0.493494	NA
4930590J08Rik	3.2098	-0.350725	2.80924	-0.124847	0.900645	NA
4931402G19Rik	5.06292	1.58939	2.99746	0.530246	0.595942	NA
4931406C07Rik	845.676	0.730305	0.521076	1.40153	0.161055	0.629292
4931406P16Rik	1201.09	-0.226072	0.414434	-0.545495	0.585413	0.904996
4931408A02Rik	225.413	-0.219252	1.11674	-0.196331	0.844351	0.974192
4931408D14Rik	47.5228	-1.52912	1.01956	-1.49979	0.133669	0.588914
4931414P19Rik	166.027	-0.219371	0.543627	-0.403532	0.686557	0.934024
4931417G12Rik	32.1234	-0.551749	1.04553	-0.527722	0.597692	0.909835
4931428F04Rik	222.599	1.42264	0.690245	2.06107	0.0392963	0.337675
4931428L18Rik	9.0558	-0.288298	1.83476	-0.157131	0.875141	NA
4931429L15Rik	4.16391	2.72616	2.49828	1.09121	0.27518	NA
4931440P22Rik	4.29873	0.40265	2.2992	0.175126	0.860981	NA
4932411L15	275.115	0.705213	0.477723	1.4762	0.139891	0.599478
4932412H11Rik	6.75122	0.303553	1.98839	0.152663	0.878664	NA
4932415G12Rik	23.6433	1.32932	1.45121	0.916007	0.359663	0.793172
4932416H05Rik	31.9156	-0.478335	1.03593	-0.461745	0.644264	0.921691
4932438A13Rik	1408.23	0.354682	0.489705	0.724277	0.468896	0.85461
4932441J04Rik	4.27148	-4.2442	3.1215	-1.35967	0.173936	NA
4933402D24Rik	5.86008	-0.813834	2.05178	-0.396648	0.691627	NA
4933403F05Rik	1640.91	-0.756771	0.384984	-1.96572	0.049331	0.374609
4933404K08Rik	30.8275	0.140764	1.13035	0.124531	0.900895	0.981389
4933404M02Rik	3.92786	3.6529	4.70869	0.775778	0.43788	NA
4933404O12Rik	99.8966	1.36706	0.814118	1.67919	0.0931156	0.503046
4933405D12Rik	13.9564	0.260313	1.46149	0.178115	0.858632	0.974651
4933405L10Rik	3.7924	0.653858	3.36872	0.194097	0.8461	NA
4933406C10Rik	2.22228	1.7711	4.71265	0.375819	0.707052	NA
4933407C03Rik	2731.83	-0.385947	0.359149	-1.07462	0.282547	0.747694
4933407H18Rik	424.324	1.29839	0.741088	1.752	0.0797732	0.47179
4933407K13Rik	94.8974	0.257296	0.665169	0.386814	0.698894	0.938529
4933408B17Rik	13.3834	-0.391998	1.57962	-0.248159	0.804011	0.964372
4933408N05Rik	15.2571	0.966069	1.45374	0.664541	0.506344	0.868574
4933409K07Rik	1761.45	-0.575574	0.375904	-1.53117	0.125727	0.575104
4933411E08Rik	11.4493	-0.124311	1.54904	-0.0802502	0.936038	NA
4933411K16Rik	7.28084	1.51332	1.96051	0.771899	0.440174	NA
4933411K20Rik	652.912	0.549422	0.375172	1.46445	0.143071	0.604835
4933412E12Rik	230.104	2.51983	0.795279	3.16849	0.00153233	0.0466027
4933413G19Rik	4.77348	-0.544089	2.36845	-0.229724	0.818307	NA
4933413J09Rik	6.91868	-0.415575	1.96245	-0.211764	0.832291	NA
4933413L06Rik	4.59997	-1.16726	2.3894	-0.488515	0.625185	NA
4933416M07Rik	3.85183	1.25989	2.49836	0.504289	0.614059	NA
4933417D19Rik	3.63368	3.55332	3.33815	1.06446	0.287121	NA
4933421E11Rik	307.492	0.170032	0.597683	0.284485	0.776039	0.957034
4933421O10Rik	129.781	0.212937	0.593207	0.358959	0.719626	0.942217
4933424B01Rik	1195.19	-0.0356698	0.432898	-0.0823977	0.93433	0.985645
4933426M11Rik	1167.83	0.685228	0.367006	1.86707	0.0618913	0.419215
4933427D14Rik	467.897	-0.820159	0.575464	-1.42521	0.154095	0.622463
4933427E11Rik	5.66022	-0.0670807	2.10578	-0.0318555	0.974587	NA
4933430H15Rik	13.6728	-0.123178	1.63465	-0.0753545	0.939933	0.986122
4933430I17Rik	6.36249	0.0997462	1.98663	0.0502089	0.959956	NA
4933431E20Rik	277.521	1.57359	0.928767	1.69428	0.0902126	0.496149
4933432B09Rik	26.1952	0.625763	1.22886	0.509224	0.610596	0.914716
4933433G15Rik	3.60562	0.744486	2.4288	0.306525	0.759205	NA
4933433G19Rik	2.80759	2.04722	2.78694	0.734575	0.462599	NA
4933433H22Rik	5.73625	-3.55199	2.70579	-1.31274	0.189271	NA
4933433P14Rik	356.237	0.0228521	0.429725	0.0531784	0.95759	0.990865
4933434E20Rik	1040.26	-0.0944117	0.375404	-0.251494	0.801432	0.963889
4933436C20Rik	38.3941	0.970114	1.14298	0.848755	0.396018	0.817857
4933437F05Rik	9.43514	0.169447	1.97726	0.0856979	0.931707	NA
4933439C10Rik	60.2932	0.97272	0.798547	1.21811	0.223181	0.697499
4933439F18Rik	941.491	0.0367656	0.346674	0.106052	0.915541	0.982422
5031425E22Rik	76.6334	-0.714573	0.827361	-0.863677	0.387765	0.811372
5031426D15Rik	13.0792	-1.11798	1.48635	-0.752166	0.451951	NA
5031434O11Rik	5.35917	1.58137	3.23334	0.489082	0.624783	NA
5031439G07Rik	1640.03	0.0168562	0.338856	0.0497444	0.960326	0.991634
5033406O09Rik	43.9883	-0.536945	1.69287	-0.31718	0.751107	0.949937
5033411D12Rik	19.1499	2.21381	1.5255	1.4512	0.146724	0.610151
5033414D02Rik	531.013	0.644411	0.39214	1.64332	0.100317	0.517822
5133401N09Rik	97.4674	0.262212	0.694286	0.377672	0.705674	0.939567
5330417C22Rik	55.8367	5.12164	2.4621	2.08019	0.0375077	0.332762
5330426P16Rik	22.4485	0.172319	1.71075	0.100727	0.919767	0.982422
5430405H02Rik	51.6014	-0.392107	0.933359	-0.420104	0.67441	0.929417
5430407P10Rik	466.288	-0.656166	0.64953	-1.01022	0.312392	0.771808
5430411K18Rik	606.726	-0.366294	0.389305	-0.940893	0.34676	0.78757
5430416N02Rik	191.862	0.722191	0.754473	0.957213	0.33846	0.783444
5430416O09Rik	3.73815	0.173591	3.54281	0.0489982	0.960921	NA
5430417L22Rik	631.81	-0.829084	0.54511	-1.52095	0.128273	0.580313
5430421F17Rik	4.209	2.63164	3.13299	0.839975	0.400922	NA
5430427M07Rik	7.6756	-0.455921	2.92403	-0.155922	0.876094	NA
5430427O19Rik	10.2835	1.40949	1.75949	0.801079	0.423086	NA
5430435G22Rik	14.7062	-1.65044	1.6977	-0.972163	0.330969	0.78179
5430437P03Rik	2265.95	0.290004	0.36067	0.80407	0.421356	0.831558
5430440P10Rik	2.17077	1.7197	3.86977	0.444393	0.656759	NA
5530601H04Rik	127.904	0.421443	0.899741	0.468404	0.639496	0.92116
5730403B10Rik	337.64	0.528078	0.490152	1.07738	0.281312	0.746535
5730403I07Rik	3.83125	3.74948	3.4042	1.10143	0.270711	NA
5730405O15Rik	4.47284	2.29016	3.10537	0.737483	0.460829	NA
5730408K05Rik	54.7548	0.0095664	1.0955	0.00873247	0.993033	0.998321
5730409E04Rik	157.576	0.726156	1.01228	0.717346	0.473161	0.855266
5730419I09Rik	693.442	-0.804179	0.556989	-1.4438	0.148796	0.613565
5730437N04Rik	652.363	0.0954479	0.402566	0.237099	0.81258	0.967495
5730455O13Rik	411.075	0.305551	0.444544	0.687335	0.491872	0.861415
5730455P16Rik	458.62	0.159042	0.402948	0.394695	0.693068	0.9359
5730469M10Rik	2048.85	-1.70413	0.656025	-2.59766	0.00938627	0.153213
5730480H06Rik	17.1714	0.38654	1.35178	0.285949	0.774917	0.957034
5730494M16Rik	498.999	-0.141267	0.621323	-0.227364	0.820141	0.969426
5730494N06Rik	550.977	0.799789	0.439211	1.82097	0.0686119	0.437414
5730507C01Rik	223.415	-0.302163	0.621383	-0.486275	0.626772	0.917648
5730508B09Rik	292.641	0.156333	0.579289	0.26987	0.78726	0.959776
5730528L13Rik	279.007	-0.416884	0.470348	-0.886332	0.375439	0.804781
5730559C18Rik	1104.37	-1.28681	0.995712	-1.29235	0.196237	0.670626
5730577I03Rik	64.4595	0.0364706	0.802956	0.0454205	0.963772	0.992447
5730590G19Rik	719.898	-1.03583	0.650323	-1.59279	0.111207	0.546849
5830415F09Rik	74.5522	0.249093	0.796158	0.312869	0.75438	0.951307
5830416P10Rik	136.183	-2.22	0.703943	-3.15367	0.00161233	0.0484333
5830417I10Rik	2010.85	-0.525018	0.323422	-1.62332	0.10452	0.528171
5830418K08Rik	1011.58	0.241381	0.339202	0.711615	0.476703	0.855266
5830428M24Rik	3.20898	-0.215416	2.72167	-0.0791484	0.936915	NA
5830433M19Rik	201.38	-0.027688	0.526283	-0.0526105	0.958042	0.991117
5930416I19Rik	883.927	-0.504543	0.465512	-1.08385	0.278433	0.742607
5930434B04Rik	405.102	0.201791	0.473492	0.426175	0.66998	0.927548
6030408B16Rik	9.69799	0.06172	1.72641	0.0357505	0.971481	NA
6030419C18Rik	95.5003	0.531319	1.60068	0.331934	0.739939	0.946707
6030422M02Rik	177.109	0.129112	0.54914	0.235117	0.814118	0.967904
6030429G01Rik	55.285	2.73533	0.940202	2.9093	0.00362241	0.082014
6030440G07Rik	23.3559	0.110036	1.17078	0.0939854	0.925121	0.983097
6030446N20Rik	45.5729	0.355114	1.31455	0.270142	0.787051	0.959665
6030458C11Rik	815.327	-0.290346	0.370029	-0.784657	0.432655	0.838928
6230400D17Rik	9.6488	0.571913	1.8108	0.315835	0.752128	NA
6230409E13Rik	618.474	2.77779	0.746604	3.72056	0.00019878	0.0100425
6330403K07Rik	10.182	1.59906	1.83283	0.872451	0.382962	NA
6330406I15Rik	25.0462	-0.95703	1.22547	-0.780947	0.434834	0.83898
6330407J23Rik	88.524	2.24829	1.41826	1.58525	0.11291	0.550269
6330408A02Rik	125.264	0.866462	0.596224	1.45325	0.146155	0.609236
6330409D20Rik	6.10029	4.3542	3.2687	1.33209	0.182831	NA
6330409N04Rik	318.524	0.238917	0.485384	0.492223	0.622561	0.916958
6330410L21Rik	5.73605	-0.497564	2.34972	-0.211754	0.832299	NA
6330416G13Rik	92.9433	1.26907	0.853373	1.48713	0.136982	0.595167
6330418K02Rik	15.5716	0.5679	1.39288	0.407716	0.683482	0.933347
6330439K17Rik	21.6895	2.32362	1.30612	1.77903	0.0752353	0.456083
6330503K22Rik	534.325	-0.493553	0.632185	-0.780709	0.434974	0.83898
6330512M04Rik	8.65603	-0.483805	1.77322	-0.27284	0.784976	NA
6330545A04Rik	12.9421	1.20517	1.64942	0.730659	0.464987	NA
6330549D23Rik	28.311	0.20752	1.1641	0.178267	0.858513	0.974651
6330578E17Rik	2486.34	-0.57341	0.485943	-1.17999	0.238003	0.709358
6430527G18Rik	1053.74	-0.240992	0.615072	-0.39181	0.695198	0.937011
6430531B16Rik	10.3541	0.672467	1.90011	0.35391	0.723406	NA
6430548G04	29.8341	-0.117831	1.1109	-0.106068	0.915528	0.982422
6430548M08Rik	23.4499	0.841738	1.63025	0.516326	0.605627	0.912129
6430550D23Rik	9.24342	2.60256	2.02598	1.2846	0.198934	NA
6430562O15Rik	4.05566	1.14441	3.51815	0.325288	0.744963	NA
6430571L13Rik	5.7095	4.35284	2.90583	1.49797	0.134142	NA
6430598A04Rik	201.206	0.60156	1.06772	0.563406	0.573158	0.900582
6430706D22Rik	3035.67	-0.0646883	0.408996	-0.158163	0.874328	0.976388
6530401N04Rik	380.691	-0.0157849	0.444778	-0.0354894	0.97169	0.994304
6530402F18Rik	46.8405	2.28293	2.36387	0.965761	0.334164	0.78222
6530418L21Rik	2.25096	0.756672	3.06179	0.247134	0.804805	NA
6720401G13Rik	791.107	1.27995	0.62577	2.04541	0.0408149	0.342354
6720456B07Rik	1952.44	-0.44526	0.605019	-0.735944	0.461765	0.852639
6720456H20Rik	263.519	0.229706	0.56568	0.40607	0.684691	0.933955
6720463M24Rik	421.908	-0.92013	0.704416	-1.30623	0.191475	0.663728
6720483E21Rik	2.87426	0.194339	3.67035	0.0529484	0.957773	NA
6720489N17Rik	119.807	0.15701	0.812802	0.193171	0.846825	0.974192
6820431F20Rik	6361.53	1.12197	0.542042	2.0699	0.0384617	0.335394
7530420F21Rik	10.5761	-0.0883377	1.9443	-0.0454342	0.963761	NA
8030423F21Rik	11.2091	0.0304882	1.62567	0.0187542	0.985037	NA
8030442B05Rik	12.1873	1.06107	1.67992	0.631617	0.527637	NA
8030462N17Rik	596.457	-0.373089	0.423341	-0.881296	0.378158	0.806064
8430403D17Rik	4.61389	-1.36306	2.25262	-0.605102	0.545111	NA
8430406I07Rik	571.166	-0.207158	0.539611	-0.383903	0.701051	0.938699
8430408G22Rik	6.54505	-6.3166	3.48925	-1.8103	0.0702489	NA
8430410A17Rik	652.258	0.284576	0.476632	0.597056	0.55047	0.891547
8430410K20Rik	1036.13	0.0210278	0.440749	0.0477092	0.961948	0.992219
8430419L09Rik	82.376	1.2312	0.705971	1.74397	0.0811635	0.474193
8430427H17Rik	1738.33	-1.69532	0.935159	-1.81287	0.0698515	0.440315
8430429K09Rik	97.6827	0.371663	0.781884	0.475343	0.634542	0.920074
8430431K14Rik	2.20587	0.824795	3.06357	0.269226	0.787755	NA
9030025P20Rik	140.106	0.72132	0.627119	1.15021	0.250057	0.717819
9030404E10Rik	3.82145	-1.98091	3.48029	-0.569179	0.569234	NA
9030425E11Rik	86.6555	-0.727924	0.817028	-0.890941	0.372961	0.803209
9030617O03Rik	107.752	-4.4456	1.27083	-3.49819	0.00046843	0.0193481
9030624G23Rik	90.0818	-0.535335	0.855868	-0.625488	0.531651	0.880838
9030624J02Rik	1347.7	-0.018675	0.430134	-0.0434166	0.965369	0.992447
9030625A04Rik	227.466	0.0111639	0.54175	0.0206071	0.983559	0.996866
9130008F23Rik	139.291	0.262825	0.881809	0.298053	0.765663	0.954832
9130011E15Rik	406.197	-0.133148	0.670291	-0.198642	0.842543	0.973531
9130011J15Rik	1161.05	0.582255	0.370275	1.57249	0.115837	0.556252
9130017N09Rik	614.669	-0.313932	1.64003	-0.191419	0.848197	0.974192
9130019O22Rik	64.503	0.310976	0.808266	0.384745	0.700426	0.938699
9130023H24Rik	74.029	-0.486537	0.842808	-0.577281	0.563749	0.897313
9130024F11Rik	31.6965	0.137904	1.08557	0.127034	0.898914	0.981389
9130206I24Rik	65.5149	0.678274	1.26263	0.537189	0.591137	0.907831
9130221F21Rik	35.1754	0.143052	1.05869	0.135121	0.892516	0.980651
9130221H12Rik	127.684	-0.212925	0.633139	-0.336301	0.736644	0.945376
9130227L01Rik	4.64281	2.7986	3.0473	0.918388	0.358416	NA
9130230L23Rik	5.18587	0.0938143	4.40709	0.0212871	0.983017	NA
9130401M01Rik	953.545	-0.133953	0.453575	-0.295327	0.767744	0.955557
9130409I23Rik	4.98812	5.63839	3.93243	1.43382	0.151625	NA
9230104L09Rik	2.67606	4.74152	4.80302	0.987197	0.323546	NA
9230110C19Rik	78.0198	2.25114	0.858139	2.62328	0.00870878	0.146006
9230112J17Rik	3.32738	-5.33905	4.39649	-1.21439	0.224598	NA
9230114K14Rik	34.8237	0.487462	1.14777	0.424704	0.671052	0.927876
9230116N13Rik	11.693	-0.503194	1.64788	-0.305358	0.760093	NA
9330020H09Rik	32.1962	-0.450884	1.02646	-0.43926	0.660473	0.924611
9330133O14Rik	131.157	0.589639	0.637798	0.924491	0.355231	0.792451
9330151L19Rik	68.1699	0.238487	0.804515	0.296436	0.766897	0.955087
9330158H04Rik	58.2534	-0.287813	1.04699	-0.274895	0.783397	0.959158
9330159F19Rik	37.0064	2.55755	1.81703	1.40754	0.159266	0.626508
9330159M07Rik	14.2847	1.04684	1.58168	0.661855	0.508064	0.869727
9330179D12Rik	10.0678	2.44863	2.00842	1.21918	0.222775	NA
9430008C03Rik	572.304	-0.0043439	0.414441	-0.0104813	0.991637	0.998321
9430015G10Rik	484.959	0.307436	0.472774	0.65028	0.515511	0.872339
9430016H08Rik	305.684	-0.395731	0.528363	-0.748977	0.453871	0.84846
9430018G01Rik	26.6975	-2.5104	1.25448	-2.00114	0.0453774	0.357004
9430020K01Rik	382.616	0.127384	0.931914	0.13669	0.891276	0.980651
9430023L20Rik	630.537	0.564503	0.380919	1.48195	0.138354	0.597837
9430037G07Rik	27.135	0.757446	1.14144	0.663591	0.506952	0.868919
9430038I01Rik	64.8952	0.12689	0.784062	0.161837	0.871434	0.976227
9430083A17Rik	3.46599	0.659437	2.47732	0.266189	0.790093	NA
9430091E24Rik	18.0684	0.896589	1.32267	0.67786	0.49786	0.864485
9530008L14Rik	64.8413	-0.281423	0.848731	-0.331581	0.740205	0.946707
9530026F06Rik	5.37332	0.44857	2.19144	0.204692	0.837813	NA
9530026P05Rik	2.29605	0.680079	3.97456	0.171108	0.864139	NA
9530027J09Rik	16.338	-1.11658	1.37528	-0.811894	0.416853	0.829424
9530036O11Rik	2.13606	0.752585	4.06876	0.184967	0.853255	NA
9530051G07Rik	7.51124	2.30928	2.94156	0.785052	0.432423	NA
9530052E02Rik	2.94407	0.25953	2.76523	0.0938549	0.925224	NA
9530053A07Rik	17.2463	-4.57517	1.74146	-2.6272	0.00860903	0.145178
9530068E07Rik	3583.92	0.116983	0.389757	0.300143	0.764068	0.95409
9530077C05Rik	42.7386	1.88836	1.21816	1.55017	0.1211	0.567919
9530082P21Rik	269.671	0.144156	0.538361	0.267768	0.788878	0.960496
9530091C08Rik	19.6493	0.27907	1.26757	0.220161	0.825746	0.970821
9630028B13Rik	4.3355	0.722679	2.31927	0.311598	0.755346	NA
9630033F20Rik	873.411	0.137848	0.667421	0.206538	0.83637	0.973261
9830001H06Rik	639.154	-1.10637	1.09508	-1.01031	0.312346	0.771808
9830132P13	12.2384	-0.870893	1.73253	-0.50267	0.615196	NA
9830147E19Rik	186.642	0.400714	0.563894	0.710619	0.477321	0.855266
9930005F22Rik	11.3261	0.923617	1.62888	0.567027	0.570696	NA
9930012K11Rik	65.0301	-2.12566	0.986455	-2.15485	0.0311735	0.303805
9930013L23Rik	16.5465	-3.09001	2.64293	-1.16916	0.242339	0.712083
9930014A18Rik	25.6474	2.15599	1.2777	1.6874	0.0915261	0.498662
9930021J03Rik	1425.89	0.617451	0.403379	1.5307	0.125844	0.575104
9930104L06Rik	169.782	0.218064	0.572422	0.380949	0.703241	0.938935
9930111J21Rik1	240.447	-3.73847	0.784116	-4.76775	1.86291e-06	0.000217884
9930111J21Rik2	14.9675	-4.05424	1.66045	-2.44165	0.0146204	0.199052
A030009H04Rik	11.5831	-0.295904	1.82565	-0.162081	0.871242	NA
A130010J15Rik	205.785	-0.758512	0.686406	-1.10505	0.269138	0.736133
A130022J15Rik	750.314	0.355796	0.556746	0.639063	0.522782	0.875501
A130040M12Rik	78289	-0.444839	1.06593	-0.417327	0.676439	0.930196
A130049A11Rik	22.3852	0.71955	1.32771	0.541949	0.587853	0.906226
A130077B15Rik	1538.2	0.366872	0.345304	1.06246	0.288027	0.752822
A230046K03Rik	2107.12	0.125426	0.410374	0.305639	0.75988	0.953315
A230050P20Rik	2.29376	4.51974	4.80605	0.940427	0.346999	NA
A230051G13Rik	192.265	-0.560547	0.539075	-1.03983	0.298419	0.76346
A230056P14Rik	32.6498	1.78586	1.74398	1.02401	0.30583	0.767348
A230072C01Rik	158.687	0.583393	0.577221	1.01069	0.312164	0.771808
A230072E10Rik	64.9675	-0.585124	1.04305	-0.560975	0.574815	0.901679
A230073K19Rik	4.1774	0.324995	2.35589	0.13795	0.89028	NA
A230077H06Rik	2.62161	-0.628507	2.80892	-0.223754	0.822949	NA
A230108P19Rik	2.88572	1.37744	3.84405	0.35833	0.720096	NA
A2ld1	178.773	0.0904218	0.862383	0.104851	0.916494	0.982422
A330009N23Rik	18.2784	0.220471	1.36599	0.1614	0.871778	0.976227
A330021E22Rik	142.65	-0.0389819	0.82177	-0.0474365	0.962165	0.992346
A330023F24Rik	11.0859	1.79628	2.79405	0.642893	0.520293	NA
A330032B11Rik	47.3095	0.141738	0.901565	0.157213	0.875077	0.976388
A330035P11Rik	13.3028	0.27662	1.46371	0.188985	0.850104	0.974192
A330040F15Rik	2.86139	-0.0102047	2.82013	-0.00361852	0.997113	NA
A330049M08Rik	13.159	0.287381	1.99038	0.144385	0.885196	NA
A330049N07Rik	4.38764	-1.16321	2.26758	-0.512972	0.607971	NA
A330050B17Rik	86.0357	0.404539	0.699742	0.578126	0.563179	0.897313
A330069E16Rik	359.111	0.118457	0.631027	0.187721	0.851096	0.974267
A3galt2	3.50425	1.66001	2.65649	0.624889	0.532044	NA
A430005L14Rik	216.626	0.0583223	0.550106	0.10602	0.915566	0.982422
A430033K04Rik	160.899	0.0999363	0.590727	0.169175	0.865659	0.975605
A430035B10Rik	2.22062	0.275222	3.9849	0.0690661	0.944937	NA
A430078G23Rik	150.665	0.292527	0.65537	0.446354	0.655342	0.92389
A430088P11Rik	3.98543	0.315552	3.44099	0.0917038	0.926933	NA
A430093F15Rik	2.41698	2.89033	3.75993	0.76872	0.44206	NA
A430105I19Rik	552.925	-1.90888	0.520153	-3.66985	0.000242695	0.0117055
A430107O13Rik	95.1898	5.13306	1.82009	2.82023	0.00479896	0.099613
A430107P09Rik	100.749	0.193014	0.701196	0.275264	0.783113	0.959065
A430110N23Rik	21.6668	2.26315	1.5534	1.4569	0.145143	0.607883
A530050N04Rik	5.47865	0.727502	2.29554	0.31692	0.751305	NA
A530054K11Rik	223.824	0.055598	0.55397	0.100363	0.920056	0.982422
A530064D06Rik	6.18569	0.371159	2.01363	0.184323	0.85376	NA
A530072M11Rik	5.19589	3.19864	2.8992	1.10328	0.269905	NA
A630001G21Rik	6.07266	-1.01616	2.49616	-0.40709	0.683942	NA
A630007B06Rik	550.611	0.580529	0.422986	1.37245	0.169923	0.641424
A630020A06	26.2663	0.00797545	1.17737	0.00677396	0.994595	0.998437
A630023A22Rik	9.07937	2.46738	2.28738	1.07869	0.280724	NA
A630033H20Rik	28.9249	4.12633	1.64258	2.5121	0.0120016	0.178288
A630055G03Rik	845.197	-0.0136709	0.745581	-0.0183359	0.985371	0.99728
A630066F11Rik	22.925	0.201114	1.45267	0.138444	0.88989	0.980651
A630072M18Rik	37.6318	-0.118764	0.975775	-0.121713	0.903126	0.981389
A630075F10Rik	52.3869	0.214334	0.859662	0.249323	0.803111	0.964302
A630089N07Rik	1304.04	0.115984	0.42922	0.27022	0.786991	0.959665
A630095E13Rik	31.6793	-8.59032	3.70516	-2.31848	0.0204235	0.240063
A730008H23Rik	872.341	-0.0730088	0.364735	-0.200169	0.841348	0.973261
A730011L01Rik	422.919	0.462603	0.483763	0.956261	0.338941	0.78364
A730017L22Rik	278.496	0.500827	0.473694	1.05728	0.290385	0.754729
A730020E08Rik	3.32388	-0.192996	3.52273	-0.0547861	0.956309	NA
A730020M07Rik	17.2375	0.375905	1.66932	0.225185	0.821835	0.969426
A730037C10Rik	6.89149	3.54305	2.27076	1.56029	0.118691	NA
A730043L09	4.44519	-0.216578	2.32998	-0.0929525	0.925941	NA
A730082K24Rik	14.4145	-0.105875	1.49089	-0.0710146	0.943386	0.987203
A730090H04Rik	28.1367	2.07555	1.7704	1.17236	0.241052	0.711391
A730090N16Rik	6.03465	1.63392	2.94773	0.5543	0.579374	NA
A730098P11Rik	39.5052	0.480534	1.08392	0.44333	0.657527	0.924227
A830007P12Rik	2195.38	-0.13689	0.498543	-0.274579	0.783639	0.959208
A830010M20Rik	103.244	0.845596	1.0244	0.825453	0.409114	0.823078
A830018L16Rik	12.6999	0.863356	1.57298	0.548866	0.583097	NA
A830052D11Rik	18.7748	0.648031	1.28845	0.502954	0.614997	0.915157
A830080D01Rik	512.859	0.523104	0.438916	1.19181	0.233336	0.705971
A830082K12Rik	73.442	0.459722	1.09044	0.421591	0.673323	0.929111
A830082N09Rik	28.4235	-0.636922	1.30052	-0.489746	0.624314	0.917033
A830093I24Rik	4.42213	0.368415	3.29552	0.111793	0.910988	NA
A930001C03Rik	3.93285	0.612296	2.48475	0.246422	0.805356	NA
A930001N09Rik	497.865	1.97088	0.799572	2.46492	0.0137045	0.19105
A930004D18Rik	143.841	-1.21621	0.60961	-1.99506	0.0460367	0.359787
A930005H10Rik	27.2192	1.27805	1.11801	1.14315	0.252977	0.722471
A930005I04Rik	13.871	1.94557	1.7646	1.10256	0.27022	0.736228
A930007I19Rik	9.50815	2.00672	1.73665	1.15551	0.24788	NA
A930012L18Rik	8.53592	-1.01091	1.90285	-0.531262	0.595237	NA
A930013F10Rik	36.5076	0.531894	0.976112	0.544911	0.585815	0.905349
A930015D03Rik	19.9797	1.39548	1.31404	1.06198	0.288244	0.752822
A930019D19Rik	2.64634	-0.507385	2.82984	-0.179298	0.857704	NA
A930024E05Rik	25.3495	1.13985	1.27499	0.894006	0.371319	0.802066
A930038C07Rik	182.625	2.0254	1.47443	1.37368	0.16954	0.641424
A930041C12Rik	2.80196	-0.780402	3.80826	-0.204924	0.837632	NA
AA388235	79.7545	0.112326	0.877481	0.128009	0.898142	0.981389
AA415398	7.25799	1.17584	1.91316	0.614607	0.538814	NA
AA465934	331.339	-0.382192	0.675272	-0.565983	0.571405	0.900417
AA467197	14.2363	0.898695	1.98776	0.452114	0.651187	0.923062
AA474331	17.8603	1.73472	1.61562	1.07372	0.28295	0.747694
AA543186	9.23823	0.306648	1.73939	0.176296	0.860062	NA
AA792892	3.71491	0.54014	3.45689	0.15625	0.875836	NA
AA960436	524.237	0.536847	0.379129	1.416	0.156776	0.623982
AA986860	349.959	-0.772025	1.48134	-0.521166	0.602251	0.910932
AA987161	150.539	-0.233376	0.606305	-0.384915	0.7003	0.938699
AF366264	12.9171	-0.554524	1.88945	-0.293484	0.769152	NA
AI115009	4.81863	5.58391	4.10994	1.35864	0.174262	NA
AI118078	49.5673	3.66724	1.86559	1.96572	0.0493306	0.374609
AI182371	15.6742	1.48287	1.56056	0.950211	0.342005	0.784494
AI314180	2112.05	0.201987	0.45908	0.439983	0.65995	0.924611
AI314976	577.591	0.120305	0.399618	0.30105	0.763376	0.954004
AI316807	215.5	1.24952	0.676505	1.84702	0.0647447	0.427888
AI317395	4.57484	-0.454193	2.24852	-0.201996	0.83992	NA
AI413582	346.857	0.402184	0.482354	0.833795	0.404397	0.821853
AI414108	27.43	1.71791	2.44097	0.703784	0.481568	0.856708
AI428936	24.8561	-2.24822	1.78035	-1.26279	0.206663	0.680857
AI429214	7.20166	0.0566343	1.86075	0.0304362	0.975719	NA
AI450353	38.3347	-0.135399	1.02201	-0.132483	0.894603	0.980758
AI462493	374.767	-0.581971	0.645746	-0.901239	0.367461	0.799198
AI464131	78.0577	1.42776	0.884006	1.6151	0.106288	0.532792
AI467606	612.516	0.355863	0.529414	0.672182	0.501468	0.866803
AI480653	283.896	0.0542802	0.692293	0.0784064	0.937505	0.985679
AI506816	95.0705	-0.0129008	0.877602	-0.0147001	0.988271	0.997809
AI597468	497.144	0.422528	0.63351	0.666964	0.504795	0.868574
AI597479	596.88	0.0496838	0.525664	0.0945164	0.924699	0.982933
AI607873	8.6598	1.02188	1.94425	0.525589	0.599173	NA
AI646023	2.28212	1.02049	4.67656	0.218214	0.827263	NA
AI661453	832.426	-0.312721	0.450312	-0.694454	0.487397	0.860294
AI662270	59.9619	-7.04936	2.55956	-2.75412	0.00588493	0.114154
AI836003	6.97767	1.30613	4.11342	0.317528	0.750843	NA
AI837181	913.329	0.290243	0.387272	0.749457	0.453582	0.84846
AI846148	381.96	0.0733212	0.497146	0.147484	0.88275	0.978625
AI848100	860.465	-0.0379183	0.497916	-0.0761541	0.939296	0.986075
AI854703	3.62015	1.92445	4.6613	0.412857	0.679711	NA
AI987944	301.918	0.604582	0.569635	1.06135	0.288531	0.752971
AK010878	246.635	-0.424338	0.634915	-0.668339	0.503917	0.868278
AK129341	23.05	-0.0241361	1.33796	-0.0180394	0.985607	0.997313
AU018091	5.27625	-2.5305	2.96222	-0.85426	0.392961	NA
AU019823	455.936	-0.157723	0.44013	-0.358357	0.720076	0.942217
AU019990	2.2306	0.96396	3.85691	0.249931	0.802641	NA
AU021092	7.9392	-5.00951	2.7466	-1.8239	0.0681678	NA
AU022252	148.291	0.335108	0.594001	0.564154	0.572649	0.900563
AU022754	25.2791	0.674925	1.28452	0.525431	0.599283	0.910205
AU023762	15.8693	-0.195586	1.6646	-0.117497	0.906466	0.981811
AU040320	761.223	0.691576	0.665244	1.03958	0.298534	0.76346
AU041133	54.1162	0.543869	0.88307	0.615885	0.537971	0.885024
AV039307	5.7313	1.11588	2.23438	0.499413	0.617488	NA
AV051173	4.00224	-0.095292	3.35853	-0.0283732	0.977365	NA
AW046200	9.14061	1.73746	1.83007	0.949396	0.342419	NA
AW112010	65.7052	0.358546	1.72993	0.207261	0.835806	0.973261
AW146020	244.887	-0.813127	0.673648	-1.20705	0.227412	0.701357
AW146154	130.059	0.626422	0.795175	0.787778	0.430826	0.838192
AW209491	385.942	-0.382986	0.424577	-0.902042	0.367035	0.798924
AW549877	956.19	0.516364	0.528206	0.977581	0.328282	0.780778
AW554918	252.714	-0.337622	0.631621	-0.534533	0.592973	0.908731
AW555464	4526.26	-1.51591	0.498831	-3.03892	0.0023743	0.0625607
AY074887	2.61644	1.91811	2.85479	0.671892	0.501652	NA
AY512931	17.8076	0.709001	1.51001	0.469534	0.638688	0.920923
Aaas	1177.71	0.358655	0.334802	1.07124	0.28406	0.748585
Aacs	947.122	-1.05878	0.470373	-2.25094	0.0243893	0.264347
Aadat	4.937	2.90034	3.19081	0.908966	0.363368	NA
Aagab	457.157	0.272291	0.430622	0.632322	0.527177	0.878159
Aak1	3068.13	-0.0303913	0.521518	-0.0582747	0.95353	0.989295
Aamp	2475.76	-0.0931718	0.411188	-0.226592	0.820741	0.969426
Aars	6618.3	1.2551	0.417591	3.00556	0.00265088	0.0660075
Aars2	386.585	-0.356711	0.450128	-0.792466	0.428089	0.837711
Aarsd1	398.954	-1.23349	0.488978	-2.52258	0.0116496	0.175404
Aasdh	201.27	0.393998	0.512454	0.768845	0.441985	0.842598
Aasdhppt	577.065	0.0101936	0.463212	0.0220062	0.982443	0.996462
Aass	19.8857	-2.067	3.41611	-0.605075	0.545129	0.889107
Aatf	1531.95	-0.34769	0.440455	-0.78939	0.429884	0.838192
Abat	35.1584	3.10478	1.52461	2.03644	0.0417059	0.344393
Abca1	616.904	4.90867	0.762146	6.4406	1.19003e-10	4.69332e-08
Abca13	19.0502	7.56871	4.13218	1.83165	0.0670031	0.432589
Abca17	3.77142	5.23521	4.35533	1.20202	0.229355	NA
Abca2	1585.46	0.292125	0.328542	0.889157	0.373919	0.804041
Abca3	1699.8	0.0814722	0.333797	0.244077	0.807171	0.965169
Abca4	7.99157	0.920723	3.10451	0.296576	0.766791	NA
Abca5	833.779	0.456932	0.603188	0.757527	0.448734	0.845763
Abca6	3.73522	-3.09207	3.33516	-0.927112	0.353868	NA
Abca7	1010.76	-0.230449	0.753855	-0.305694	0.759837	0.953315
Abca8b	25.8796	0.034448	1.17634	0.0292841	0.976638	0.995577
Abcb10	672.814	-0.125442	0.427949	-0.293123	0.769428	0.955856
Abcb1a	953.508	-0.307486	0.860568	-0.357306	0.720863	0.942217
Abcb1b	2250.73	-0.656101	0.771973	-0.849902	0.39538	0.817529
Abcb4	244.024	3.10426	1.22543	2.53321	0.0113024	0.172035
Abcb6	326.144	0.548285	0.855122	0.641177	0.521407	0.875456
Abcb7	1193.02	-0.207314	0.396256	-0.523181	0.600848	0.910932
Abcb8	579.587	0.337274	0.456461	0.738889	0.459974	0.852098
Abcb9	28.2575	2.13993	1.30386	1.64123	0.10075	0.51842
Abcc1	2116.81	0.0727278	0.489289	0.14864	0.881838	0.978625
Abcc10	185.542	1.03519	0.536239	1.93046	0.0535501	0.392223
Abcc2	5.46175	-4.62255	4.29843	-1.0754	0.282195	NA
Abcc3	2106.26	-1.12828	2.22032	-0.508161	0.61134	0.914716
Abcc4	1815.17	-0.252667	0.661086	-0.3822	0.702313	0.938699
Abcc5	2613.57	-0.45409	0.76014	-0.597376	0.550256	0.891547
Abcc6	44.6228	4.27916	2.39567	1.7862	0.0740665	0.452846
Abcc8	10.8121	-4.33057	3.70525	-1.16877	0.242498	NA
Abcd1	368.098	1.28442	0.568396	2.25973	0.023838	0.262266
Abcd2	20.4632	1.45154	1.44858	1.00204	0.316323	0.773524
Abcd3	1884	-0.308785	0.592541	-0.521119	0.602284	0.910932
Abcd4	277.19	1.10368	0.799202	1.38098	0.167286	0.637894
Abce1	9246.96	-0.0832409	0.435487	-0.191144	0.848413	0.974192
Abcf1	6316.24	-0.58865	0.371485	-1.58459	0.11306	0.550269
Abcf2	3642.93	-0.0713405	0.315609	-0.22604	0.82117	0.969426
Abcf3	699.801	0.0963395	0.472939	0.203704	0.838585	0.973261
Abcg1	19.7277	-5.01218	2.5307	-1.98055	0.0476413	0.367548
Abcg2	628.783	-0.123321	1.27763	-0.0965227	0.923105	0.982422
Abcg4	11.4977	3.20322	2.03492	1.57412	0.115459	NA
Abhd1	36.3914	2.67904	1.05186	2.54696	0.0108667	0.167536
Abhd10	158.814	0.06506	0.577092	0.112738	0.910239	0.982407
Abhd11	514.803	0.643482	0.482878	1.3326	0.182663	0.653
Abhd12	1987.1	-0.202164	0.557641	-0.362534	0.716953	0.94207
Abhd13	879.959	0.0439463	0.387678	0.113358	0.909747	0.982407
Abhd14a	394.711	1.04289	0.438992	2.37565	0.0175181	0.219343
Abhd14b	361.301	1.26046	0.647224	1.94748	0.0514771	0.385873
Abhd15	20.0997	0.0635265	1.58629	0.0400472	0.968056	0.993115
Abhd16a	543.533	0.778235	0.526632	1.47776	0.139473	0.598791
Abhd16b	6.71076	1.34054	2.29655	0.583719	0.559409	NA
Abhd2	3712.84	-0.901524	0.433524	-2.07952	0.0375692	0.332762
Abhd3	12.8366	1.52143	1.5782	0.964032	0.33503	NA
Abhd4	559.687	-0.0598175	0.495052	-0.120831	0.903825	0.981389
Abhd5	344.703	0.407852	0.464521	0.878005	0.379941	0.806571
Abhd6	378.55	-0.958694	0.487187	-1.96782	0.0490891	0.373701
Abhd8	546.356	0.323987	0.636834	0.508746	0.61093	0.914716
Abi1	2406.66	0.14287	0.322212	0.443405	0.657473	0.924227
Abi2	877.019	0.463156	0.393476	1.17709	0.239161	0.710231
Abi3	81.6343	-0.823044	1.40612	-0.585329	0.558326	0.895233
Abl1	2607.75	-0.0505228	0.307902	-0.164087	0.869663	0.976227
Abl2	3689.53	-0.34216	0.453989	-0.753674	0.451045	0.846947
Ablim1	1626.14	0.831156	0.685207	1.213	0.22513	0.699094
Ablim2	5.74146	1.71227	3.19235	0.536368	0.591705	NA
Ablim3	12.8152	5.5555	2.79715	1.98613	0.047019	NA
Abr	1757.57	0.0602386	0.35771	0.168401	0.866268	0.975605
Abt1	812.638	-0.200431	0.418934	-0.478431	0.632343	0.91957
Abtb1	127.166	0.795082	0.852142	0.933039	0.3508	0.789558
Abtb2	49.1061	1.10417	1.3614	0.811053	0.417335	0.829424
Acaa1a	852.621	0.838714	0.432136	1.94086	0.0522756	0.389084
Acaa1b	40.6752	-1.98332	1.51569	-1.30852	0.190696	0.663382
Acaa2	908.712	0.381034	0.64901	0.5871	0.557137	0.895233
Acaca	3829.75	-0.0816159	0.390263	-0.20913	0.834347	0.973074
Acacb	41.0756	2.38511	1.55576	1.53308	0.125255	0.575104
Acad10	152.834	0.832707	1.3428	0.620126	0.535175	0.883457
Acad11	320.517	1.10781	0.633307	1.74924	0.0802492	0.472203
Acad12	64.1817	1.20893	0.805778	1.50032	0.133531	0.588914
Acad8	223.678	0.264229	0.512787	0.51528	0.606357	0.912792
Acad9	1284.87	-0.665503	0.400903	-1.66001	0.0969121	0.509612
Acadl	1874.46	-0.896488	0.666001	-1.34608	0.178278	0.64802
Acadm	991.016	-0.432285	0.454105	-0.95195	0.341122	0.783866
Acads	729.439	-0.0692621	0.504837	-0.137197	0.890875	0.980651
Acadsb	588.473	0.933063	0.410392	2.27359	0.0229907	0.257168
Acadvl	1084.62	0.207773	0.454302	0.457345	0.647423	0.922896
Acan	2518.73	-3.92411	0.775707	-5.05875	4.22017e-07	6.61509e-05
Acap1	6.92053	-3.84452	2.64178	-1.45528	0.145592	NA
Acap2	1405.86	0.103881	0.31893	0.325716	0.744639	0.948085
Acap3	402.582	-0.802297	0.702233	-1.1425	0.253248	0.722488
Acat1	1611.77	1.85394	0.57391	3.23037	0.0012363	0.0397807
Acat2	1615.49	0.743444	0.741427	1.00272	0.315996	0.773524
Acat3	12.5561	-0.119805	1.67517	-0.0715182	0.942985	NA
Acbd3	1496.97	0.0420808	0.523659	0.0803591	0.935952	0.985679
Acbd4	225.662	0.695806	0.722692	0.962798	0.335649	0.782952
Acbd5	1388.66	0.389938	0.408965	0.953476	0.340349	0.783866
Acbd6	560.644	-0.107325	0.388881	-0.275985	0.78256	0.959017
Acbd7	3.3135	0.390311	2.67442	0.145943	0.883967	NA
Accn2	293.719	2.64213	1.05285	2.5095	0.0120902	0.179078
Accn3	3.67521	2.52533	2.87096	0.879609	0.379071	NA
Accs	32.2762	0.678667	1.03372	0.656531	0.511483	0.871278
Acd	618.792	0.542749	0.595687	0.911131	0.362227	0.794664
Ace	1003	5.71347	1.23367	4.63128	3.63417e-06	0.000363808
Acer1	4.7128	-1.02173	3.23352	-0.315981	0.752017	NA
Acer2	4.23058	1.10524	2.37229	0.465894	0.641291	NA
Acer3	631.964	-0.99977	0.437263	-2.28643	0.0222292	0.252578
Ache	7.64816	2.94655	3.08469	0.955216	0.339469	NA
Acin1	3312.77	-0.369404	0.320398	-1.15295	0.248929	0.71657
Acly	7245.05	-0.0675572	0.32072	-0.210642	0.833166	0.973074
Acmsd	20.4403	-0.0670446	1.47018	-0.0456028	0.963627	0.992447
Acn9	72.7307	0.404682	0.865113	0.467779	0.639942	0.92116
Acnat1	244.811	0.601466	0.721013	0.834196	0.404171	0.821853
Acnat2	9.6686	-4.5684	3.73722	-1.22241	0.221553	NA
Aco1	1802.93	-0.1123	0.399028	-0.281435	0.778377	0.957138
Aco2	5827.02	-0.0493668	0.29158	-0.169308	0.865555	0.975605
Acot1	11.5016	-7.12789	3.46851	-2.05503	0.039876	NA
Acot11	26.1599	0.5719	1.54032	0.371285	0.710425	0.940719
Acot13	462.436	0.951116	0.492741	1.93025	0.0535753	0.392223
Acot2	243.995	2.00566	1.02944	1.9483	0.0513787	0.385873
Acot7	2617.88	-0.461219	0.478193	-0.964503	0.334794	0.78222
Acot8	162.874	0.42532	0.628084	0.677171	0.498297	0.864743
Acot9	1182.75	0.307711	0.508102	0.605608	0.544775	0.888988
Acox1	2133.23	-0.0158515	0.341843	-0.0463708	0.963015	0.992447
Acox2	22.8828	-4.46713	1.87013	-2.38867	0.0169094	0.214011
Acox3	189.848	0.662027	0.653933	1.01238	0.311358	0.770735
Acp1	2664.14	-0.52844	0.309248	-1.70879	0.0874896	0.48999
Acp2	987.746	0.736289	0.406448	1.81152	0.0700606	0.440618
Acp5	93.2537	3.43076	1.57587	2.17706	0.0294764	0.295635
Acp6	442.972	-0.0246972	0.523425	-0.0471838	0.962367	0.992346
Acpl2	742.187	2.3948	0.43047	5.56321	2.6486e-08	5.60999e-06
Acrbp	72.9927	1.17343	1.20476	0.973994	0.33006	0.78179
Acsbg1	804.785	-1.68675	0.776308	-2.17279	0.0297961	0.297377
Acsf2	752.721	1.92257	0.707364	2.71794	0.00656897	0.122427
Acsf3	215.364	0.0501756	0.570051	0.0880195	0.929861	0.98472
Acsl1	588.123	1.25183	0.687695	1.82032	0.0687097	0.437523
Acsl3	2931.11	0.104419	0.63695	0.163937	0.869781	0.976227
Acsl4	2467.64	0.681144	0.554968	1.22736	0.219688	0.692788
Acsl5	6625.21	-1.06743	0.620479	-1.72034	0.0853711	0.485412
Acsl6	18.038	-1.23895	2.84634	-0.435279	0.66336	0.924721
Acsm2	4.84061	1.37118	2.24051	0.611995	0.540541	NA
Acsm3	5.83434	1.15927	2.35063	0.493173	0.62189	NA
Acss2	129.223	1.10386	0.842345	1.31046	0.190042	0.662461
Acta1	10.8313	-2.88103	1.97057	-1.46203	0.143734	NA
Acta2	2.65672	-1.28771	3.63567	-0.354188	0.723198	NA
Actb	116303	-0.763412	0.343865	-2.22009	0.0264124	0.277421
Actg1	59178.3	-0.869378	0.591252	-1.4704	0.141453	0.600472
Actl6a	1681.02	-0.864578	0.408034	-2.11889	0.0341	0.316306
Actn1	12344.7	-1.14335	0.328885	-3.47646	0.000508083	0.020501
Actn2	6.37932	0.860948	2.89319	0.297577	0.766026	NA
Actn3	9.65482	0.288991	1.98352	0.145696	0.884161	NA
Actn4	11772.7	-0.784726	0.514109	-1.52638	0.126915	0.578057
Actr10	1953.8	0.21574	0.376918	0.572377	0.567066	0.899449
Actr1a	4051.69	-0.592007	0.435832	-1.35834	0.174357	0.644344
Actr1b	1895.81	-0.397794	0.370682	-1.07314	0.283208	0.747694
Actr2	6833.62	-0.533964	0.328287	-1.62652	0.10384	0.526074
Actr3	9489.09	-1.03125	0.573289	-1.79883	0.0720456	0.447576
Actr5	257.165	-0.280948	0.480655	-0.58451	0.558877	0.895317
Actr6	181.273	-0.116853	0.532207	-0.219563	0.826212	0.971104
Actr8	444.475	-0.0565841	0.408158	-0.138633	0.88974	0.980651
Acvr1	1347.4	0.49981	0.353939	1.41214	0.157909	0.625715
Acvr1b	636.481	0.917516	0.545123	1.68314	0.0923485	0.500257
Acvr2a	565.904	0.327297	0.542724	0.603064	0.546466	0.889844
Acvr2b	64.9087	-0.281363	0.910473	-0.30903	0.757299	0.952622
Acy1	343.971	0.762051	0.499713	1.52498	0.127264	0.578629
Acy3	174.078	0.576897	1.3227	0.436151	0.662727	0.924611
Acyp1	141.87	1.22084	0.641936	1.90181	0.0571958	0.40472
Acyp2	13.6181	-0.945726	1.75342	-0.539362	0.589637	0.906855
Ada	95.5886	0.307052	1.4498	0.211789	0.832272	0.972907
Adal	269.833	0.620899	0.577955	1.0743	0.282687	0.747694
Adam10	3954.99	0.37781	0.374795	1.00805	0.313433	0.772431
Adam11	10.5999	-2.35403	1.96856	-1.19582	0.231768	NA
Adam12	35.7814	-0.960858	1.60858	-0.597333	0.550285	0.891547
Adam15	914.1	-1.09316	0.452378	-2.41647	0.0156718	0.204923
Adam17	1885.77	0.103682	0.492061	0.210711	0.833113	0.973074
Adam19	25.8235	-4.79969	1.40562	-3.41465	0.000638633	0.0243998
Adam1a	28.2807	-0.0397278	1.3696	-0.0290068	0.976859	0.995577
Adam21	4.54328	0.152685	2.30801	0.066154	0.947255	NA
Adam22	9.47735	0.250932	1.68532	0.148893	0.881638	NA
Adam28	14.8405	0.132625	1.4877	0.0891482	0.928964	0.98472
Adam32	10.0481	0.628038	1.88242	0.333632	0.738657	NA
Adam33	14.7767	5.75826	2.62994	2.18951	0.02856	0.291259
Adam4	14.2325	-0.279361	1.59501	-0.175147	0.860964	0.974697
Adam5	4.16225	1.55495	2.48601	0.62548	0.531656	NA
Adam8	68.8888	0.388775	0.799015	0.486568	0.626564	0.917648
Adam9	6826.4	-0.776854	0.3504	-2.21705	0.0266199	0.278167
Adamts1	12.1719	-0.604421	2.15175	-0.280897	0.778789	NA
Adamts10	544.311	1.92285	0.744011	2.58444	0.00975386	0.156087
Adamts12	5.29394	0.703895	3.03465	0.231953	0.816575	NA
Adamts14	40.2698	-0.378164	2.10287	-0.179832	0.857284	0.974597
Adamts15	4.3436	1.57705	3.40041	0.463782	0.642804	NA
Adamts17	8.60708	2.77875	1.93597	1.43533	0.151194	NA
Adamts4	30.529	-0.987429	1.27586	-0.773933	0.43897	0.841148
Adamts6	54.7423	-0.484254	1.60496	-0.301724	0.762863	0.954004
Adamts7	29.2447	1.77191	1.88623	0.939392	0.34753	0.787659
Adamts9	280.161	-2.17464	0.665792	-3.26625	0.00108982	0.0365045
Adamtsl4	485.225	2.49838	0.558973	4.46958	7.83719e-06	0.000717913
Adamtsl5	629.049	1.1601	0.816902	1.42012	0.155574	0.623982
Adap1	109.189	-0.100353	1.27226	-0.0788774	0.93713	0.985679
Adap2	10.4814	-2.59419	1.72495	-1.50392	0.132602	NA
Adar	866.715	-0.774463	0.65358	-1.18495	0.236035	0.707915
Adarb1	248.949	-0.427727	1.19319	-0.358473	0.719989	0.942217
Adat1	267.655	0.169819	0.476082	0.356702	0.721315	0.942217
Adat2	109.629	-0.320152	0.733504	-0.43647	0.662496	0.924611
Adat3	66.8642	-0.161217	0.805021	-0.200264	0.841274	0.973261
Adc	47.0383	4.97218	1.74002	2.85755	0.00426923	0.0917322
Adck1	267.913	0.902433	0.503543	1.79216	0.0731066	0.450304
Adck2	175.377	1.36883	0.766467	1.78589	0.0741167	0.452846
Adck3	33.2415	1.55488	1.27081	1.22354	0.221127	0.694949
Adck4	229.188	1.41916	0.674728	2.1033	0.0354396	0.322865
Adck5	250.983	0.683818	0.518044	1.32	0.186835	0.656775
Adcy1	187.274	-5.69868	2.0588	-2.76796	0.00564084	0.111234
Adcy3	16.449	1.11052	1.4529	0.764347	0.444661	0.843782
Adcy5	3.43088	1.17671	2.55622	0.460332	0.645278	NA
Adcy6	2632.28	0.123864	0.656566	0.188654	0.850364	0.974192
Adcy7	85.4561	-1.4268	1.55763	-0.916007	0.359663	0.793172
Adcy8	2.89605	-5.14023	4.65506	-1.10422	0.269496	NA
Adcy9	176.146	1.26002	1.17581	1.07162	0.283891	0.748513
Adcyap1	8.00743	2.20938	2.03407	1.08619	0.277396	NA
Add1	3581.21	0.2124	0.385309	0.551247	0.581464	0.903933
Add2	498.802	-1.45921	1.62661	-0.89709	0.369671	0.800637
Add3	887.871	-1.26087	0.793155	-1.58969	0.111904	0.548783
Adh5	2064.8	-0.415234	0.350834	-1.18356	0.236586	0.708224
Adh7	4.92389	-1.6951	2.43511	-0.69611	0.48636	NA
Adhfe1	13.2766	1.48707	1.50596	0.98746	0.323417	0.777034
Adi1	1069.46	-0.472071	0.429089	-1.10017	0.271258	0.737285
Adipor1	2863.47	-0.168339	0.51216	-0.328684	0.742395	0.947807
Adipor2	4330.64	0.27858	0.76716	0.363132	0.716507	0.94207
Adk	1202.77	-0.486637	0.434689	-1.11951	0.262925	0.729246
Adm	5.63969	4.33496	2.93768	1.47564	0.14004	NA
Adm2	56.9154	2.32967	1.96126	1.18784	0.234896	0.707698
Adnp	3604.45	-0.213313	0.359071	-0.59407	0.552465	0.892979
Adnp2	841.081	-0.276297	0.376181	-0.73448	0.462656	0.852639
Ado	802.951	-0.127339	0.388638	-0.327655	0.743173	0.947807
Adora1	143.073	-5.8016	1.94795	-2.97831	0.00289846	0.0692122
Adora2a	6.37327	-0.746524	2.35893	-0.316467	0.751648	NA
Adora2b	3.8745	1.5061	4.64125	0.324502	0.745558	NA
Adpgk	909.001	0.045867	0.411146	0.111559	0.911173	0.982407
Adprh	612.039	0.986841	0.427755	2.30703	0.0210534	0.244133
Adprhl2	241.801	-0.0823481	0.495007	-0.166357	0.867876	0.975871
Adra1d	64.3389	-0.848979	1.94333	-0.436867	0.662208	0.924611
Adra2a	91.8311	3.16092	1.58186	1.99824	0.0456912	0.358298
Adra2b	3.82666	-0.666746	2.46676	-0.270292	0.786936	NA
Adrb2	73.5768	4.10465	1.74708	2.34943	0.0188019	0.228501
Adrbk1	2565.06	-0.117191	0.416467	-0.281394	0.778409	0.957138
Adrbk2	4.66938	-0.339555	2.30985	-0.147003	0.88313	NA
Adrm1	2365.71	-0.221531	0.42154	-0.525529	0.599216	0.910205
Adsl	2748.32	0.0496678	0.366755	0.135425	0.892276	0.980651
Adss	4172.68	-0.698261	0.385114	-1.81313	0.069812	0.440315
Adssl1	328.936	0.986197	0.734784	1.34216	0.179545	0.648618
Aebp1	99.3716	-3.87946	1.43172	-2.70965	0.00673542	0.12383
Aebp2	2098.89	-0.622366	0.362833	-1.7153	0.0862909	0.487943
Aen	934.112	-0.244805	0.343051	-0.713611	0.475468	0.855266
Aes	4237.12	-0.0237062	0.489094	-0.0484696	0.961342	0.992196
Afap1	390.818	-2.30128	0.817105	-2.81639	0.00485671	0.100389
Afap1l1	4.32781	-0.842971	2.2766	-0.370277	0.711176	NA
Afap1l2	13.6179	0.33452	2.80018	0.119464	0.904908	0.981389
Aff1	2929.03	0.211606	0.875655	0.241655	0.809048	0.965937
Aff2	154.139	2.7092	0.629332	4.30488	1.67077e-05	0.00138958
Aff4	6713.09	-0.416858	0.371774	-1.12127	0.262175	0.728813
Afg3l1	1273.58	0.0818494	0.38819	0.210849	0.833005	0.973074
Afg3l2	1729.29	-0.514939	0.348678	-1.47683	0.13972	0.599166
Afmid	394.382	0.294021	0.419407	0.701039	0.483279	0.857931
Afp	66.7492	-3.76095	1.6625	-2.26223	0.023683	0.261325
Aftph	1281.13	-0.283589	0.364769	-0.777448	0.436894	0.8401
Aga	314.459	0.946767	0.618686	1.53029	0.125946	0.575104
Agap1	2157.4	-0.205382	0.349793	-0.587153	0.557101	0.895233
Agap2	8.75885	-2.52789	2.01693	-1.25333	0.210085	NA
Agap3	1579.91	-0.143041	0.411962	-0.347218	0.728428	0.943711
Agbl3	29.882	1.88743	1.15885	1.62871	0.103375	0.524441
Agbl5	310.2	0.11749	0.584324	0.201071	0.840643	0.973261
Ager	14.1754	1.10797	1.7222	0.643343	0.520001	0.874489
Agfg1	2648.28	-0.575124	0.510893	-1.12572	0.260282	0.728133
Agfg2	450.69	-0.21539	0.676248	-0.318507	0.7501	0.949504
Aggf1	1037.9	-0.696963	0.462232	-1.50782	0.1316	0.585497
Agk	257.717	-0.402792	0.565096	-0.712784	0.47598	0.855266
Agl	975.511	0.306311	0.468735	0.653485	0.513444	0.872283
Agpat1	2549.51	-0.241922	0.341166	-0.709104	0.47826	0.855266
Agpat2	304.591	-0.274246	0.547072	-0.501298	0.616162	0.91562
Agpat3	1147.64	0.131308	0.40452	0.324601	0.745483	0.948533
Agpat4	441.077	-0.37749	0.750097	-0.503255	0.614785	0.915117
Agpat5	1789.49	-0.195889	0.353809	-0.553657	0.579814	0.903793
Agpat6	3680.5	0.667526	0.321656	2.07528	0.0379608	0.33334
Agpat9	215.558	1.16596	0.519862	2.24283	0.0249077	0.267829
Agphd1	157.894	3.60515	1.25002	2.88408	0.00392554	0.0866979
Agps	2817.64	-0.233735	0.346651	-0.674268	0.500141	0.866077
Agrn	2950.51	-1.95475	0.60698	-3.22046	0.00127985	0.0407923
Agt	5.25755	-1.53269	3.02551	-0.50659	0.612443	NA
Agtpbp1	600.637	-0.0588542	0.593682	-0.0991342	0.921032	0.982422
Agtrap	275.364	0.888997	0.580631	1.53109	0.125748	0.575104
Agxt2l2	190.338	-0.764368	0.602435	-1.2688	0.204513	0.678681
Ahctf1	5192.93	-0.685734	0.385034	-1.78097	0.0749173	0.455012
Ahcy	8934.96	-0.870456	0.658243	-1.32239	0.186038	0.656757
Ahcyl1	5183.74	-0.0694536	0.582264	-0.119282	0.905052	0.981389
Ahcyl2	2886.75	1.30908	0.903029	1.44965	0.147155	0.610698
Ahdc1	551.253	-0.208033	0.543696	-0.382627	0.701997	0.938699
Ahi1	198.335	0.777868	1.13189	0.687229	0.491938	0.861415
Ahnak	63031.9	0.118304	0.321237	0.368277	0.712666	0.941208
Ahr	682.46	0.691265	0.821223	0.841751	0.399928	0.819331
Ahsa1	2911.77	-0.717669	0.43109	-1.66478	0.0959574	0.508402
Ahsa2	954.57	-0.73271	0.355996	-2.0582	0.0395711	0.339268
Aif1l	1118.17	0.634539	0.991853	0.639751	0.522334	0.875501
Aifm1	1538.76	-0.31307	0.495481	-0.631851	0.527484	0.878259
Aifm2	236.182	0.403183	0.497395	0.810589	0.417602	0.829424
Aifm3	43.0204	2.66857	1.68485	1.58387	0.113224	0.550845
Aig1	288.533	2.68377	0.885914	3.02938	0.00245054	0.0636504
Aim1	3975.12	-0.741179	0.402752	-1.84029	0.065726	0.430267
Aim1l	9.45573	1.42564	2.94159	0.484651	0.627924	NA
Aim2	178.456	-3.32282	1.42343	-2.33437	0.0195765	0.233146
Aimp1	1571.64	0.0138167	0.316555	0.0436472	0.965186	0.992447
Aimp2	1410.75	-0.545647	0.572249	-0.953514	0.34033	0.783866
Aip	1826	0.301326	0.451152	0.667903	0.504195	0.868278
Aipl1	2.4604	0.942533	2.86751	0.328694	0.742387	NA
Airn	100.113	0.386214	0.86448	0.446758	0.655049	0.92389
Ak1	34.883	-2.0849	1.50512	-1.38521	0.165988	0.636817
Ak2	1500.75	0.0163425	0.518962	0.0314907	0.974878	0.99535
Ak3	2848.08	0.110708	0.573632	0.192994	0.846964	0.974192
Ak4	199.169	1.00497	0.900357	1.11619	0.264341	0.73126
Ak5	879.379	-0.400781	1.07162	-0.373996	0.708407	0.939886
Ak7	2.44211	0.940324	3.01189	0.312204	0.754885	NA
Ak8	4.39574	-0.366802	3.23985	-0.113216	0.909859	NA
Akap1	1820.78	-0.462112	0.492745	-0.937833	0.34833	0.787872
Akap10	733.973	-0.0872871	0.366772	-0.237987	0.811891	0.967199
Akap11	1139.68	1.62708	0.782165	2.08022	0.0375054	0.332762
Akap12	49.0402	0.702626	1.90254	0.36931	0.711897	0.940893
Akap13	1409.38	0.254628	0.57684	0.441418	0.65891	0.924481
Akap17b	70.6914	3.51849	1.32246	2.66056	0.00780109	0.136252
Akap2	2140.7	1.43225	0.479777	2.98525	0.00283347	0.0680589
Akap5	42.6483	-1.1344	0.989775	-1.14612	0.251745	0.720872
Akap6	22.6569	7.81938	2.27178	3.44196	0.000577508	0.0227029
Akap7	142.896	0.439939	0.577889	0.761286	0.446486	0.844529
Akap8	2446.51	-0.527291	0.326963	-1.61269	0.106812	0.534102
Akap8l	608.419	1.39763	0.623866	2.24027	0.0250731	0.268427
Akap9	1891.2	-0.265596	0.374256	-0.709666	0.477911	0.855266
Akirin1	872.839	0.208978	0.433266	0.482333	0.629569	0.919045
Akirin2	895.288	0.0698416	0.375442	0.186025	0.852425	0.974267
Akna	12.4898	2.307	2.26702	1.01764	0.30885	NA
Akr1a1	3439.33	0.308082	0.366065	0.841604	0.40001	0.819331
Akr1b10	154.443	0.472965	0.61455	0.769613	0.44153	0.842598
Akr1b3	472.442	-0.523741	0.761463	-0.687809	0.491573	0.861415
Akr1b7	3.17343	-2.15526	3.48174	-0.619019	0.535904	NA
Akr1b8	1577.25	-1.46423	0.534728	-2.73827	0.00617634	0.117803
Akr1c12	291.505	-1.67807	1.58234	-1.0605	0.288915	0.753235
Akr1c13	698.021	-0.63662	1.54422	-0.412261	0.680148	0.931584
Akr1c14	14.7973	2.34431	1.64784	1.42266	0.154835	0.622959
Akr1c19	105.182	-1.23514	2.58048	-0.478646	0.63219	0.91957
Akr1c20	3.35941	0.211172	2.61216	0.0808421	0.935567	NA
Akr1d1	3.43439	-1.63126	2.64467	-0.616808	0.537361	NA
Akr1e1	419.951	0.287167	0.480363	0.597814	0.549964	0.891523
Akr7a5	224.035	-0.125837	0.482957	-0.260555	0.794435	0.960753
Akt1	7194.96	-0.791566	0.363291	-2.17887	0.0293411	0.29549
Akt1s1	1701.24	-0.0432601	0.391421	-0.110521	0.911997	0.982422
Akt2	2062.62	-0.0107136	0.321313	-0.0333433	0.973401	0.994717
Akt3	634.871	-0.408682	0.795276	-0.513887	0.607331	0.9132
Aktip	871.699	0.631914	0.523847	1.20629	0.227704	0.701462
Alad	593.349	-0.142212	0.544722	-0.261073	0.794036	0.960753
Alas1	816.321	0.668444	0.59551	1.12247	0.261662	0.728391
Alas2	4.7101	-0.519902	2.21328	-0.234901	0.814285	NA
Alcam	2577.49	0.123755	0.68102	0.18172	0.855802	0.974597
Aldh16a1	541.636	-0.545554	0.643802	-0.847394	0.396775	0.818444
Aldh18a1	4745.05	1.24776	0.499875	2.49614	0.0125552	0.181952
Aldh1a1	236.144	-2.02293	1.57492	-1.28446	0.19898	0.674237
Aldh1a3	26.8001	2.21026	1.59396	1.38665	0.165549	0.636135
Aldh1a7	27.006	-0.603466	2.30014	-0.262361	0.793043	0.960753
Aldh1b1	14.5039	3.10392	3.52687	0.880079	0.378817	0.806446
Aldh1l1	8.3116	2.60666	2.63518	0.989175	0.322578	NA
Aldh1l2	328.801	1.11324	1.13332	0.982282	0.325961	0.779676
Aldh2	7280.45	0.245448	0.54719	0.448561	0.653748	0.923875
Aldh3a1	1228.54	0.845366	1.48772	0.568229	0.56988	0.9004
Aldh3a2	1715.12	0.780357	0.608179	1.2831	0.199456	0.674237
Aldh3b1	165.749	-0.336368	0.588498	-0.571571	0.567613	0.899732
Aldh4a1	210.552	0.40202	0.544452	0.738393	0.460275	0.852098
Aldh5a1	91.8603	2.06999	0.689618	3.00164	0.00268529	0.0664583
Aldh6a1	325.55	1.40362	0.674124	2.08214	0.0373294	0.332645
Aldh7a1	1409.61	-0.286919	0.410487	-0.698973	0.484569	0.858995
Aldh9a1	2011.57	0.0312435	0.700226	0.0446192	0.964411	0.992447
Aldoa	12169.3	-0.495449	0.34849	-1.4217	0.155113	0.623203
Aldoart1	55.442	-0.445937	1.02063	-0.436921	0.662169	0.924611
Aldob	2.79573	2.18475	4.70545	0.464303	0.642431	NA
Aldoc	120.546	2.52305	0.947277	2.66348	0.00773372	0.135564
Alg1	381.846	0.343365	0.482443	0.711722	0.476637	0.855266
Alg10b	2864.36	-0.0564846	0.334371	-0.168928	0.865853	0.975605
Alg11	780.468	0.37845	0.497599	0.760552	0.446925	0.844529
Alg12	219.742	0.191088	0.493764	0.387003	0.698754	0.938529
Alg13	438.394	0.101934	0.757899	0.134495	0.893011	0.980755
Alg14	250.862	0.04623	0.483141	0.0956864	0.92377	0.982725
Alg2	695.8	0.560244	0.592094	0.946208	0.344043	0.786525
Alg3	401.525	-0.554749	0.649287	-0.854397	0.392885	0.815607
Alg5	843.142	-0.483367	0.355737	-1.35877	0.174218	0.644344
Alg6	334.79	0.315814	0.585395	0.539488	0.58955	0.906855
Alg8	1298.68	-0.279333	0.4273	-0.653717	0.513294	0.872283
Alg9	397.207	-0.159774	0.409125	-0.390526	0.696147	0.937449
Alkbh1	298.844	-0.0606753	0.447472	-0.135596	0.892141	0.980651
Alkbh2	181.861	1.14244	0.714506	1.59892	0.109839	0.54258
Alkbh3	400.356	0.358221	0.48479	0.738921	0.459955	0.852098
Alkbh4	84.3003	0.104006	0.73191	0.142102	0.886999	0.979668
Alkbh5	2956.58	0.0044322	0.344292	0.0128734	0.989729	0.998138
Alkbh6	180.756	0.0180249	0.621201	0.0290162	0.976852	0.995577
Alkbh7	122.375	-0.0396908	0.912961	-0.0434748	0.965323	0.992447
Alkbh8	285.115	0.0504062	0.475113	0.106093	0.915508	0.982422
Alms1	852.286	-0.386838	0.375776	-1.02944	0.303274	0.766436
Alox12	4.31554	0.0295473	2.50407	0.0117997	0.990585	NA
Alox8	27.8605	-0.00347082	1.19613	-0.00290171	0.997685	0.999297
Aloxe3	3.75689	2.43754	3.24725	0.750647	0.452865	NA
Alpi	24.6832	-4.59995	2.36947	-1.94135	0.0522163	0.389029
Alpk1	194.385	2.03923	0.858865	2.37433	0.0175809	0.219343
Alpk3	2.60083	-1.79476	3.82488	-0.469232	0.638904	NA
Alpl	34.0009	2.63274	2.48035	1.06144	0.28849	0.752971
Als2	1238.9	0.17137	0.533421	0.321266	0.748009	0.949341
Als2cl	1590.73	-1.20065	0.431893	-2.77998	0.00543627	0.108313
Als2cr12	13.9632	-3.15946	1.63249	-1.93536	0.0529461	0.390562
Als2cr4	667.218	0.372983	0.495501	0.752738	0.451608	0.847223
Alx4	2.91768	-0.87087	2.69489	-0.323156	0.746577	NA
Alyref	2582.52	-0.519064	0.705789	-0.735437	0.462073	0.852639
Alyref2	49.2822	-0.330213	0.919371	-0.359173	0.719466	0.942217
Amac1	3.81673	1.82523	2.50734	0.727956	0.46664	NA
Amacr	180.008	1.18913	0.581602	2.04457	0.0408973	0.342354
Ambra1	1012.08	0.244037	0.380864	0.640745	0.521689	0.875501
Amd1	2141.08	-2.68201	3.50075	-0.766122	0.443603	0.843099
Amd2	1101.53	0.129333	4.56229	0.0283483	0.977384	0.995577
Amdhd1	16.9557	3.09671	2.15942	1.43404	0.151559	0.619576
Amdhd2	565.665	0.49039	0.631551	0.776485	0.437463	0.8401
Amfr	2978.95	0.309214	0.347226	0.890527	0.373183	0.803427
Amh	3.5194	0.188494	2.47033	0.0763029	0.939178	NA
Amhr2	17.0461	0.625963	1.93254	0.323907	0.746008	0.94856
Amigo1	197.536	-0.236385	0.649243	-0.364093	0.715789	0.941856
Amigo2	101.906	-1.43284	1.94549	-0.736492	0.461431	0.852639
Amigo3	34.7468	0.412169	1.05121	0.392091	0.694991	0.936943
Ammecr1	199.525	-0.547448	0.638978	-0.856755	0.39158	0.814166
Ammecr1l	1093.51	-0.521835	0.508615	-1.02599	0.304895	0.767322
Amn	7.15722	2.60145	2.73593	0.950844	0.341683	NA
Amn1	147.694	1.30666	1.2161	1.07446	0.282615	0.747694
Amot	273.249	0.903392	0.94909	0.95185	0.341173	0.783866
Amotl1	1005.89	0.851328	1.16534	0.730541	0.465059	0.852639
Amotl2	3207.05	-0.0988195	0.581314	-0.169993	0.865015	0.975544
Ampd2	1879.05	-0.284403	0.331991	-0.856659	0.391633	0.814166
Ampd3	84.2188	1.74905	1.57519	1.11037	0.266838	0.733993
Amph	4.58753	5.5176	4.79542	1.1506	0.249898	NA
Amt	42.5178	3.03629	1.25598	2.41746	0.0156291	0.204585
Amz1	18.1361	2.27172	1.73674	1.30803	0.190862	0.663468
Amz2	735.201	0.312303	0.377483	0.82733	0.40805	0.823078
Anapc1	8604.98	-0.41882	0.416965	-1.00445	0.315162	0.773263
Anapc10	285.988	0.224506	0.49978	0.449209	0.653281	0.923875
Anapc11	2235.87	0.349311	0.456094	0.765874	0.443751	0.843099
Anapc13	545.976	0.259397	0.44512	0.582757	0.560057	0.896238
Anapc16	480.119	0.22078	0.510147	0.432777	0.665177	0.925153
Anapc2	2517.43	0.297055	0.300361	0.988992	0.322667	0.777019
Anapc4	1580.65	-0.208719	0.343067	-0.60839	0.542929	0.887963
Anapc5	4891.97	-0.767921	0.36925	-2.07967	0.0375554	0.332762
Anapc7	886.121	-0.325851	0.36072	-0.903334	0.366349	0.798924
Ang	75.1136	-1.31185	1.18592	-1.10619	0.268643	0.735571
Angel1	59.8628	1.01816	1.01195	1.00614	0.314349	0.772656
Angel2	795.7	0.407552	0.518624	0.785833	0.431965	0.838928
Angpt1	59.5342	7.70692	3.0296	2.54388	0.010963	0.168808
Angpt2	35.527	-0.891462	1.30406	-0.683604	0.494225	0.863148
Angptl1	2.47681	1.82359	2.89455	0.630008	0.528689	NA
Angptl2	145.495	-2.83193	1.01646	-2.78608	0.00533495	0.107455
Angptl4	3685.58	1.34299	0.755508	1.77759	0.0754707	0.456785
Angptl6	131.9	3.4217	1.37737	2.48424	0.012983	0.183928
Angptl7	10.3149	-0.0762878	1.66426	-0.0458388	0.963439	NA
Ank	7792.69	1.4394	0.509595	2.8246	0.00473396	0.0987563
Ank1	630.419	1.66788	0.864752	1.92874	0.0537632	0.392423
Ank2	68.1183	2.50477	1.38363	1.8103	0.0702499	0.441243
Ank3	178.843	0.103941	0.674621	0.154073	0.877552	0.977163
Ankar	2.89255	0.200253	2.61079	0.0767018	0.938861	NA
Ankdd1b	41.1702	-0.950881	1.44835	-0.656526	0.511486	0.871278
Ankfy1	2653.73	-0.205953	0.375925	-0.547857	0.58379	0.904329
Ankhd1	2637.6	-0.368919	0.460883	-0.800461	0.423444	0.834117
Ankib1	1611.85	-0.0444331	0.327371	-0.135727	0.892037	0.980651
Ankle1	377.311	-0.00918238	0.87317	-0.0105161	0.991609	0.998321
Ankle2	1410.22	-0.347499	0.378035	-0.919225	0.357978	0.793172
Ankmy2	390.834	0.469072	0.510363	0.919094	0.358046	0.793172
Ankra2	238.095	0.403836	0.60728	0.664991	0.506056	0.868574
Ankrd1	7523.17	0.663431	0.421811	1.57282	0.115762	0.556252
Ankrd10	1055.29	0.0131741	0.466723	0.0282267	0.977481	0.995577
Ankrd11	5354.58	0.202205	0.397863	0.508228	0.611293	0.914716
Ankrd12	684.067	0.507729	0.465021	1.09184	0.274903	0.739778
Ankrd13a	1785.99	-0.859174	0.361956	-2.3737	0.0176109	0.219343
Ankrd13b	892.417	-0.363674	0.433224	-0.839459	0.401212	0.82077
Ankrd13c	1093.76	-0.419942	0.367733	-1.14198	0.253464	0.722488
Ankrd13d	77.3961	1.52464	1.0293	1.48124	0.138542	0.597837
Ankrd16	185.809	0.440082	0.624844	0.704306	0.481242	0.856708
Ankrd17	5216.3	-0.307578	0.33483	-0.918609	0.3583	0.793172
Ankrd23	74.0266	1.18808	1.08043	1.09964	0.271488	0.737285
Ankrd24	103.969	1.60891	0.834856	1.92717	0.053959	0.393148
Ankrd26	946.057	-0.703622	0.346358	-2.03149	0.0422054	0.346508
Ankrd27	1239.79	-0.448296	0.336074	-1.33392	0.182229	0.652588
Ankrd28	2472.68	-0.45243	0.457446	-0.989035	0.322646	0.777019
Ankrd32	476.895	-0.504195	0.62818	-0.802629	0.422189	0.83253
Ankrd34a	31.431	0.597896	1.70543	0.350584	0.725901	0.943481
Ankrd35	10.8372	1.36973	2.55322	0.53647	0.591634	NA
Ankrd37	33.7039	2.07026	1.04496	1.98118	0.0475713	0.367408
Ankrd39	107.357	0.652817	0.680629	0.959138	0.337489	0.783444
Ankrd40	1531.77	-0.505522	0.365843	-1.3818	0.167033	0.637573
Ankrd42	31.2083	0.451134	1.15399	0.390934	0.695846	0.937352
Ankrd44	230.562	-0.341389	0.490697	-0.695722	0.486603	0.860294
Ankrd46	679.458	0.504072	0.467849	1.07742	0.281291	0.746535
Ankrd49	246.013	0.0916509	0.562344	0.16298	0.870534	0.976227
Ankrd5	5.3455	4.25131	2.92636	1.45276	0.14629	NA
Ankrd50	2633.47	0.23294	0.3652	0.637843	0.523576	0.875683
Ankrd52	2154.24	-0.218639	0.473006	-0.462234	0.643913	0.921539
Ankrd53	2.34717	2.84226	3.84515	0.73918	0.459798	NA
Ankrd54	356.903	0.278232	0.423616	0.656801	0.511309	0.871278
Ankrd6	21.732	-2.18621	1.97474	-1.10709	0.268257	0.735283
Ankrd61	8.03043	-0.531947	1.9447	-0.273537	0.784441	NA
Ankrd9	429.854	1.11941	0.52178	2.14538	0.0319228	0.307205
Anks1	795.839	-0.386286	0.403613	-0.957072	0.338531	0.783444
Anks1b	143.368	-0.237495	1.62302	-0.146329	0.883661	0.978625
Anks3	163.548	0.0682388	0.575906	0.118489	0.90568	0.981663
Anks4b	31.0565	-3.39311	2.28126	-1.48738	0.136914	0.595167
Anks6	173.984	3.70581	0.879776	4.21221	2.5288e-05	0.00195678
Ankzf1	241.612	0.345446	0.747949	0.461857	0.644184	0.921684
Anln	6755.93	0.235256	0.401806	0.585497	0.558214	0.895233
Ano1	5639.66	-0.349499	0.33288	-1.04993	0.293752	0.758169
Ano10	600.201	0.740936	0.568383	1.30359	0.192375	0.665339
Ano6	4168.49	-0.000784658	0.595759	-0.00131707	0.998949	0.999566
Ano7	12.8715	-4.39666	3.53281	-1.24452	0.213307	NA
Ano8	819.161	0.75959	0.552908	1.37381	0.169501	0.641424
Ano9	7.36265	-3.37198	2.39935	-1.40537	0.159911	NA
Anp32a	2875.62	-0.127934	0.423437	-0.302133	0.762551	0.953949
Anp32b	6259.34	-0.139463	0.359314	-0.388137	0.697914	0.938359
Anp32e	3721.55	-1.02186	0.492314	-2.07563	0.0379286	0.33334
Anpep	8.85898	-3.14551	1.87557	-1.6771	0.0935235	NA
Antxr1	830.537	-1.76256	1.41514	-1.2455	0.212948	0.687096
Antxr2	2741.35	0.0432808	0.318498	0.13589	0.891908	0.980651
Antxrl	4.06999	0.0690019	3.44769	0.020014	0.984032	NA
Anubl1	66.3204	0.881699	0.857611	1.02809	0.303909	0.766564
Anxa1	7279.47	0.0779051	0.64184	0.121378	0.903392	0.981389
Anxa10	280.547	-5.26736	1.11873	-4.70835	2.49736e-06	0.000278227
Anxa11	648.842	-0.73024	0.378217	-1.93074	0.0535149	0.392223
Anxa13	3.95591	-0.0549346	3.42268	-0.0160502	0.987194	NA
Anxa2	24627.6	-1.09784	0.375083	-2.92692	0.00342334	0.0789694
Anxa3	12291.3	-1.07487	0.318852	-3.37105	0.000748814	0.0273908
Anxa4	10744.7	-1.81441	0.956315	-1.89729	0.0577898	0.407226
Anxa5	13515.2	-0.706161	0.30616	-2.30651	0.0210823	0.244133
Anxa6	662.912	0.435018	0.882212	0.493099	0.621943	0.916907
Anxa7	2101.81	-0.229735	0.415355	-0.553104	0.580192	0.903793
Anxa8	3683.83	0.0200178	0.404476	0.0494906	0.960528	0.991675
Anxa9	209.621	0.307131	0.710121	0.432505	0.665374	0.925153
Aoc2	148.743	0.724524	0.683925	1.05936	0.289435	0.753864
Aoc3	3.90169	0.460493	2.34589	0.196298	0.844377	NA
Aox1	291.631	1.38999	0.754567	1.8421	0.0654598	0.429813
Aox3	2.10262	4.39459	4.80797	0.914021	0.360706	NA
Ap1ar	1902.93	-0.567459	0.311609	-1.82106	0.0685977	0.437414
Ap1b1	1589.02	0.10097	0.465698	0.216815	0.828353	0.971385
Ap1g1	3458.9	0.205664	0.316769	0.649254	0.516175	0.872463
Ap1g2	285.45	-0.302634	0.72563	-0.417064	0.676632	0.930196
Ap1m1	1605.61	-0.204068	0.522949	-0.390226	0.696369	0.937472
Ap1s1	1845.39	-0.576558	0.507735	-1.13555	0.256145	0.724213
Ap1s2	346.738	-0.945218	0.682655	-1.38462	0.166168	0.636817
Ap1s3	310.748	-0.179025	0.554424	-0.322903	0.746769	0.94887
Ap2a1	2245.2	-0.328102	0.343352	-0.955587	0.339281	0.783833
Ap2a2	4154.72	-0.930244	0.405722	-2.29281	0.021859	0.249531
Ap2b1	4611.82	-0.46939	0.367474	-1.27734	0.201482	0.675622
Ap2m1	4878.94	-0.77432	0.454986	-1.70185	0.0887829	0.492105
Ap2s1	1331.8	-0.497984	0.443045	-1.124	0.261011	0.728384
Ap3b1	1729.32	0.118867	0.353032	0.336702	0.736341	0.945245
Ap3d1	2355.43	0.0648347	0.3193	0.203052	0.839094	0.973261
Ap3m1	1347.97	-0.34785	0.402747	-0.863693	0.387756	0.811372
Ap3m2	372.687	3.08105	0.870348	3.54002	0.000400097	0.0172239
Ap3s1	1091.35	-0.443694	0.484006	-0.916712	0.359293	0.793172
Ap3s2	1003.45	-0.00285857	0.358311	-0.00797792	0.993635	0.998437
Ap4b1	460.255	-0.213631	0.41526	-0.514451	0.606937	0.913169
Ap4e1	528.678	0.294234	0.43384	0.678207	0.49764	0.864348
Ap4m1	254.409	-0.00748021	0.551344	-0.0135672	0.989175	0.997991
Ap4s1	100.848	-0.286039	0.774048	-0.369536	0.711728	0.940893
Apaf1	556.452	-0.0311734	0.40682	-0.076627	0.93892	0.986075
Apba1	34.7977	2.78329	1.63471	1.70262	0.0886396	0.492105
Apba3	514.541	0.52841	0.557729	0.947431	0.343419	0.78641
Apbb1	212.938	0.766481	0.638197	1.20101	0.229747	0.703054
Apbb1ip	9.50461	-0.353577	3.95941	-0.0893005	0.928843	NA
Apbb2	1954.96	-0.053551	0.54709	-0.0978833	0.922025	0.982422
Apbb3	208.135	0.77394	0.823253	0.9401	0.347166	0.787659
Apc	2895.36	-0.518817	0.442805	-1.17166	0.241333	0.711944
Apc2	159.185	0.112594	0.659581	0.170705	0.864456	0.975435
Apcdd1	590.954	1.91722	0.432059	4.43739	9.10565e-06	0.000818571
Apeh	889.416	0.360267	0.350906	1.02668	0.304573	0.766984
Apex1	1873.84	-0.842428	0.512972	-1.64225	0.100538	0.518137
Apex2	317.619	-0.640143	0.654346	-0.978295	0.327928	0.780699
Aph1a	1618.14	-0.524083	0.361306	-1.45052	0.146913	0.610524
Aph1b	261.436	2.86385	0.889438	3.21984	0.0012826	0.0407923
Aph1c	60.6386	2.67049	1.0999	2.42794	0.015185	0.202898
Api5	5020.02	-0.503289	0.484991	-1.03773	0.299397	0.76346
Apip	479.158	0.403446	0.429475	0.939394	0.347528	0.787659
Apitd1	131.742	-0.169407	1.10118	-0.153842	0.877734	0.977163
Aplf	410.791	-0.0764633	0.45301	-0.168789	0.865962	0.975605
Apln	73.2801	-2.95943	1.46541	-2.01951	0.0434337	0.351095
Aplp1	52.6703	7.53056	3.01954	2.49394	0.0126332	0.18257
Aplp2	6151.36	0.742666	0.621784	1.19441	0.232317	0.704965
Apoa1	31.9175	-1.90948	2.24943	-0.848874	0.395951	0.817857
Apoa1bp	639.796	0.0418445	0.506506	0.082614	0.934158	0.985645
Apoa2	14.4228	-0.207399	1.45314	-0.142724	0.886508	0.979668
Apob	5967.54	-0.837982	3.02465	-0.277051	0.781741	0.959017
Apobec1	109.259	2.98473	1.40585	2.12309	0.0337467	0.315461
Apobec2	2.36065	-1.04497	3.80075	-0.274939	0.783363	NA
Apobec3	794.611	0.194252	0.588835	0.329893	0.741481	0.94718
Apobr	256.402	-5.41556	1.56688	-3.45628	0.00054768	0.0218121
Apoc2	404.204	-4.51376	1.49184	-3.02562	0.00248121	0.0639985
Apoe	55.2659	-0.0179336	0.903084	-0.0198582	0.984156	0.996866
Apof	2.91251	1.29992	2.71971	0.477964	0.632676	NA
Apol11b	8.26957	0.197095	2.13678	0.0922392	0.926508	NA
Apol6	5.40802	0.793232	2.18039	0.363803	0.716005	NA
Apol7a	68.0356	1.84543	1.34587	1.37118	0.170318	0.641424
Apol7b	15.5406	-0.045759	1.48676	-0.0307777	0.975447	0.995352
Apol7d	6.67624	1.25386	2.04569	0.612927	0.539924	NA
Apol7e	11.4603	1.00039	1.66626	0.600379	0.548254	NA
Apol8	4.74567	2.29592	2.35532	0.974781	0.329669	NA
Apol9a	4.01471	0.929076	2.4845	0.373949	0.708442	NA
Apol9b	10.9348	-2.22138	2.52164	-0.880927	0.378357	NA
Apold1	11.5833	1.31921	1.7815	0.740505	0.458994	NA
Apom	3.857	-0.381903	2.392	-0.159658	0.87315	NA
Apon	7.91788	0.918226	1.87279	0.4903	0.623922	NA
Apoo	258.395	-0.306031	0.601164	-0.509065	0.610707	0.914716
Apool	138.214	-0.583567	0.57087	-1.02224	0.306667	0.767987
App	2969.12	0.820483	1.26459	0.648811	0.51646	0.872463
Appbp2	1153.6	-0.398807	0.493988	-0.80732	0.419482	0.830657
Appl1	826.323	0.371564	0.632273	0.587663	0.556758	0.895233
Appl2	350.917	-0.939106	0.756692	-1.24107	0.214581	0.689503
Aprt	3895.7	0.108013	0.321645	0.335814	0.737011	0.945448
Aptx	151.358	1.17681	0.58091	2.0258	0.0427849	0.348422
Aqp1	348.218	-7.7607	1.40288	-5.532	3.16607e-08	6.56074e-06
Aqp11	38.16	-0.784211	1.07163	-0.731794	0.464294	0.852639
Aqp3	58.7181	-0.0932164	1.80502	-0.0516429	0.958813	0.991335
Aqp5	6400.75	2.0489	2.83342	0.723118	0.469607	0.854887
Aqp7	5.24012	0.441462	2.29832	0.19208	0.84768	NA
Aqp8	94.4987	-6.76827	1.27223	-5.32002	1.03754e-07	1.89329e-05
Aqr	3742.13	-0.266417	0.364588	-0.730735	0.464941	0.852639
Ar	38.1202	3.92101	3.1352	1.25064	0.211065	0.684642
Araf	1100.5	0.208889	0.361976	0.577079	0.563886	0.897313
Arap1	689.789	-0.931728	0.573004	-1.62604	0.103941	0.526074
Arap2	718.349	1.33707	0.52753	2.53459	0.0112579	0.17162
Arap3	890.8	-6.41191	0.546098	-11.7413	7.82609e-32	3.18939e-28
Arc	135.879	4.65076	1.41865	3.27828	0.0010444	0.0353583
Arcn1	5483.11	-0.0253871	0.329051	-0.0771524	0.938502	0.985919
Areg	1918.01	0.951115	0.747271	1.27278	0.203095	0.6775
Arf1	8606.99	-0.561497	0.387672	-1.44838	0.14751	0.611136
Arf2	646.418	-0.544995	0.734499	-0.741996	0.45809	0.851939
Arf3	3802.51	0.0575691	0.318436	0.180787	0.856535	0.974597
Arf4	3027.93	-0.821899	0.494175	-1.66317	0.0962776	0.508762
Arf5	1297.41	-0.10384	0.461904	-0.224809	0.822128	0.969547
Arf6	8616.62	0.714075	0.32273	2.21261	0.0269246	0.280153
Arfgap1	1027.42	0.188744	0.500853	0.376845	0.706289	0.939567
Arfgap2	1242.01	-0.330101	0.358144	-0.921701	0.356685	0.793172
Arfgap3	421.856	1.16073	0.630735	1.84029	0.065726	0.430267
Arfgef1	3017.93	-0.496268	0.506807	-0.979204	0.327479	0.780699
Arfgef2	1936.08	0.229429	0.351325	0.653037	0.513732	0.872283
Arfip1	2298.02	0.388964	0.419298	0.927656	0.353586	0.791481
Arfip2	1062.21	-0.145461	0.335401	-0.433692	0.664512	0.924795
Arfrp1	489.393	-0.0216953	0.502132	-0.0432064	0.965537	0.992447
Arglu1	1269.86	-0.1988	0.337411	-0.589191	0.555733	0.895233
Arhgap1	2904.06	0.103234	0.422575	0.244297	0.807001	0.965117
Arhgap10	1013.73	1.08625	0.568057	1.91222	0.0558477	0.398256
Arhgap11a	2791.72	-0.4753	0.587483	-0.809044	0.41849	0.829517
Arhgap12	1099.44	-0.262108	0.800817	-0.327301	0.74344	0.947807
Arhgap17	724.947	-0.92261	0.515964	-1.78813	0.0737553	0.451543
Arhgap18	1087.43	0.315803	0.458412	0.688907	0.490882	0.861298
Arhgap19	1656.23	-0.207601	0.715198	-0.29027	0.771609	0.955856
Arhgap21	2788.55	-0.126881	0.404217	-0.313892	0.753603	0.951055
Arhgap22	714.519	-0.371176	0.509971	-0.727838	0.466713	0.853256
Arhgap23	957.95	-0.121544	0.496324	-0.244888	0.806543	0.964907
Arhgap24	14.4055	-2.38734	2.461	-0.97007	0.332012	0.78179
Arhgap26	46.6044	1.32419	1.3481	0.982264	0.32597	0.779676
Arhgap27	794.242	-1.44577	0.492243	-2.93712	0.00331279	0.0770004
Arhgap28	17.7251	7.46702	3.067	2.43463	0.0149068	0.20116
Arhgap29	175.691	0.798254	1.12209	0.711401	0.476836	0.855266
Arhgap31	97.1743	3.12624	1.48623	2.10347	0.0354244	0.322865
Arhgap32	22.4429	0.232275	2.3081	0.100635	0.91984	0.982422
Arhgap33	31.6272	-0.0300084	1.41603	-0.0211919	0.983093	0.99679
Arhgap39	447.655	-0.0186398	0.431339	-0.0432138	0.965531	0.992447
Arhgap4	9.51288	2.6049	2.20637	1.18062	0.237752	NA
Arhgap40	44.6004	-5.10691	1.23523	-4.13437	3.55931e-05	0.00257492
Arhgap42	767.687	0.309664	0.876765	0.353189	0.723946	0.943097
Arhgap44	44.144	-1.8085	1.74786	-1.0347	0.300811	0.764598
Arhgap5	3258.54	0.141685	0.324947	0.436025	0.662818	0.924611
Arhgap6	493.262	1.41179	0.686285	2.05714	0.0396725	0.339593
Arhgap8	169.385	5.00597	0.6829	7.33046	2.29361e-13	1.47587e-10
Arhgap9	16.3947	-5.14885	2.42242	-2.1255	0.0335448	0.314193
Arhgdia	12820.1	-0.399018	0.483372	-0.825489	0.409094	0.823078
Arhgdib	2.42008	-0.118494	3.83812	-0.0308729	0.975371	NA
Arhgdig	234.109	0.210119	0.583009	0.360404	0.718545	0.942217
Arhgef1	1699.55	-0.535194	0.41078	-1.30287	0.192617	0.665553
Arhgef10	980.672	1.40395	0.577905	2.42938	0.0151245	0.202311
Arhgef10l	155.194	0.444889	2.21092	0.201223	0.840524	0.973261
Arhgef11	929.865	-0.268523	0.460337	-0.583318	0.559679	0.895985
Arhgef12	3621.61	0.15266	0.439984	0.346967	0.728616	0.943711
Arhgef15	4.43794	-0.19192	3.28399	-0.0584411	0.953397	NA
Arhgef16	247.748	1.51429	4.56334	0.331838	0.740012	0.946707
Arhgef17	2101.87	-0.900549	0.447443	-2.01266	0.0441508	0.354003
Arhgef18	2375.75	0.27951	0.516366	0.541303	0.588299	0.906226
Arhgef19	175.394	1.28744	0.98122	1.31208	0.189493	0.6614
Arhgef2	3099.34	-0.226943	0.39647	-0.572409	0.567045	0.899449
Arhgef25	293.762	1.20853	0.766967	1.57573	0.115089	0.554238
Arhgef26	124.741	-0.0929868	1.85543	-0.050116	0.96003	0.991593
Arhgef3	263.102	0.157505	0.976709	0.161261	0.871888	0.976227
Arhgef4	27.9124	1.09423	1.27997	0.854891	0.392612	0.815506
Arhgef40	1491.02	-1.92765	0.334967	-5.75473	8.67786e-09	2.21032e-06
Arhgef5	3142.22	-0.748232	1.15017	-0.650541	0.515343	0.872339
Arhgef7	1649.63	0.730222	0.55225	1.32227	0.186079	0.656757
Arhgef9	24.0929	4.16484	2.06329	2.01854	0.0435351	0.351095
Arid1a	3229.63	-0.0491551	0.326617	-0.150498	0.880372	0.978227
Arid1b	2175.62	0.229029	0.359427	0.637206	0.52399	0.876256
Arid2	2256.5	0.301407	0.402169	0.749453	0.453584	0.84846
Arid3a	199.634	-1.12043	0.920057	-1.21778	0.223308	0.697715
Arid3b	130.4	0.949967	0.629885	1.50816	0.131514	0.585324
Arid4a	945.142	-0.0046432	0.471966	-0.009838	0.992151	0.998321
Arid4b	833.244	-0.335025	0.479822	-0.698227	0.485035	0.859427
Arid5a	266.417	-0.282251	0.479784	-0.588288	0.556339	0.895233
Arid5b	993.429	0.725299	0.433854	1.67176	0.0945723	0.506235
Arih1	3198.9	-0.0147155	0.343199	-0.0428774	0.965799	0.992447
Arih2	1099.93	0.0575293	0.331227	0.173685	0.862113	0.97477
Arl1	974.01	0.0514295	0.377894	0.136095	0.891746	0.980651
Arl10	98.2375	-0.766548	0.823582	-0.930748	0.351984	0.790767
Arl13b	223.868	0.483641	0.633359	0.763612	0.445099	0.843948
Arl14	205.86	-0.920276	1.51686	-0.606697	0.544052	0.888441
Arl15	260.044	0.204866	0.673425	0.304215	0.760964	0.953526
Arl16	203.222	0.0399246	0.541647	0.0737096	0.941241	0.986508
Arl2	998.636	0.124667	0.400025	0.311649	0.755307	0.951401
Arl2bp	1661.63	-0.159882	0.397425	-0.402295	0.687467	0.934024
Arl3	1160.73	0.588034	0.487488	1.20625	0.22772	0.701462
Arl4a	278.685	0.383555	0.892608	0.429702	0.667412	0.926205
Arl4c	3256.43	0.153087	0.650521	0.23533	0.813953	0.967904
Arl4d	16.1126	0.349668	1.66579	0.209911	0.833737	0.973074
Arl5a	2397.35	-0.37602	0.31921	-1.17797	0.238808	0.710231
Arl5b	411.466	0.618667	0.433359	1.42761	0.153405	0.621932
Arl5c	8.74501	3.81699	2.53992	1.5028	0.132891	NA
Arl6	148.049	0.618909	0.618486	1.00068	0.31698	0.773524
Arl6ip1	3519.36	-1.02682	0.438028	-2.34419	0.0190685	0.230921
Arl6ip4	814.974	-0.591163	0.457023	-1.29351	0.195835	0.670371
Arl6ip5	2315.44	-0.54448	0.47522	-1.14574	0.251902	0.720872
Arl6ip6	842.009	-0.345195	0.479308	-0.720195	0.471405	0.855167
Arl8a	983.9	0.217801	0.522745	0.416649	0.676935	0.930196
Arl8b	2296.18	0.00989662	0.38782	0.0255186	0.979641	0.996059
Armc1	819.331	-0.321979	0.553532	-0.58168	0.560782	0.896576
Armc10	1174.13	-0.297025	0.419221	-0.708518	0.478624	0.855266
Armc2	9.26027	1.34689	1.86275	0.723068	0.469638	NA
Armc5	402.996	0.0432291	0.437567	0.0987942	0.921302	0.982422
Armc6	248.573	-0.0068399	0.755114	-0.0090581	0.992773	0.998321
Armc7	72.1842	0.73572	0.752329	0.977923	0.328112	0.780699
Armc8	696.291	0.153763	0.360256	0.426815	0.669514	0.9274
Armc9	217.193	0.648285	0.564734	1.14795	0.25099	0.719654
Armcx2	3.02821	-1.1036	4.64501	-0.237588	0.8122	NA
Armcx3	26.8204	6.63705	3.24183	2.04731	0.0406274	0.342354
Armcx4	4.42233	-2.72793	4.53198	-0.601928	0.547222	NA
Armcx5	95.2694	-0.202858	0.803982	-0.252316	0.800797	0.963759
Arnt	1077.77	0.474859	0.361792	1.31252	0.189344	0.661218
Arntl	255.056	1.00018	0.474707	2.10693	0.0351234	0.321903
Arntl2	84.4924	0.363648	0.993753	0.365934	0.714414	0.941592
Arpc1a	1705.04	-0.256847	0.335626	-0.765278	0.444106	0.843458
Arpc1b	6710.61	-0.046586	0.344618	-0.135182	0.892468	0.980651
Arpc2	8155.77	-0.530797	0.628717	-0.844254	0.398528	0.818697
Arpc3	2213.71	-0.209839	0.342628	-0.612441	0.540246	0.886465
Arpc4	3633.76	-0.618823	0.368302	-1.68021	0.0929172	0.502657
Arpc5	3234.29	-0.140324	0.434264	-0.323131	0.746596	0.94887
Arpc5l	944.505	-0.39346	0.350577	-1.12232	0.261725	0.728391
Arpp19	1863.61	-0.320136	0.390033	-0.820791	0.411765	0.825962
Arrb1	854.702	1.91924	0.495212	3.87559	0.000106366	0.00607679
Arrb2	856.195	0.519685	0.447237	1.16199	0.245239	0.713711
Arrdc1	325.498	-0.399586	0.614484	-0.650279	0.515512	0.872339
Arrdc2	116.882	1.57521	0.975936	1.61405	0.106517	0.533502
Arrdc3	453.774	0.874472	0.62603	1.39685	0.162458	0.630343
Arrdc4	33.0203	-3.72534	2.22263	-1.6761	0.0937185	0.504349
Arsa	415.271	2.03453	0.654043	3.1107	0.00186645	0.05304
Arsb	465.642	4.27538	0.716641	5.96586	2.43342e-09	6.6802e-07
Arsg	40.3048	0.897226	1.06322	0.843878	0.398738	0.818697
Arsi	7.72058	-5.13543	3.9726	-1.29271	0.196111	NA
Arsj	6.73833	2.50846	4.10137	0.611616	0.540792	NA
Arsk	303.675	0.560152	0.524111	1.06877	0.285175	0.750119
Art2a-ps	2.69016	-5.03321	4.75119	-1.05936	0.289437	NA
Artn	4.99337	4.02153	4.47843	0.897978	0.369197	NA
Arv1	115.958	-0.107797	0.761184	-0.141618	0.887382	0.979959
Arvcf	110.66	0.566581	1.03543	0.547193	0.584246	0.904329
Arxes2	3.28438	-1.13633	3.64842	-0.311458	0.755452	NA
As3mt	45.4689	-3.19771	1.20639	-2.65064	0.00803396	0.139324
Asah1	4718.53	0.592415	0.462154	1.28186	0.199893	0.674445
Asah2	393.612	2.79174	0.795454	3.50963	0.000448738	0.0187796
Asap1	3918.39	-0.277925	0.349107	-0.796102	0.425973	0.836675
Asap2	2806.41	-0.455632	0.567666	-0.802642	0.422182	0.83253
Asap3	57.645	1.14668	1.15352	0.994068	0.32019	0.774854
Asb1	297.029	-0.160276	0.602719	-0.265922	0.790299	0.960753
Asb13	237.48	-0.0668955	0.640356	-0.104466	0.9168	0.982422
Asb3	299.813	0.292246	0.472493	0.618519	0.536233	0.883847
Asb4	5.32078	4.15096	2.94911	1.40753	0.15927	NA
Asb6	668.135	-0.10558	0.523891	-0.20153	0.840284	0.973261
Asb7	376.443	0.653685	0.558953	1.16948	0.24221	0.712083
Asb8	528.001	-0.0155596	0.498535	-0.0312106	0.975102	0.995352
Ascc1	339.407	0.113292	0.585527	0.193487	0.846578	0.974192
Ascc2	1124.94	0.0690616	0.327472	0.210893	0.832971	0.973074
Ascc3	2339.65	-0.856363	0.44177	-1.93848	0.0525647	0.389949
Asf1a	364.406	-0.779852	0.453772	-1.7186	0.0856876	0.485908
Asf1b	1128.15	-0.203212	0.814257	-0.249568	0.802922	0.964302
Asgr1	14.6964	1.65903	1.44058	1.15164	0.249471	0.717315
Ash1l	3260.7	-0.502444	0.305515	-1.64458	0.100056	0.517466
Ash2l	2233.96	0.353651	0.466172	0.758627	0.448076	0.845658
Asl	513.439	0.196564	0.45665	0.430448	0.66687	0.925863
Asna1	2100.83	0.318033	0.373636	0.851184	0.394667	0.816973
Asns	4739.04	2.25109	0.844191	2.66656	0.00766313	0.134898
Asnsd1	1573.77	-0.207817	0.382414	-0.543435	0.58683	0.906226
Aspa	192.465	3.81633	1.19099	3.20432	0.0013538	0.041852
Aspg	2.29376	4.51974	4.80605	0.940427	0.346999	NA
Asph	1117.6	-0.35788	0.429719	-0.832824	0.404944	0.821853
Asphd2	2.50981	-4.93533	4.80834	-1.02641	0.304698	NA
Aspm	2255.26	-0.889401	0.658968	-1.34969	0.177117	0.646479
Asprv1	2.18115	0.679792	4.05787	0.167524	0.866958	NA
Aspscr1	670.356	0.567001	0.450131	1.25963	0.207801	0.682709
Asrgl1	155.754	1.95543	0.812385	2.40702	0.0160831	0.208739
Aste1	124.135	-0.0940396	0.633235	-0.148507	0.881943	0.978625
Asxl1	2290.32	-0.0451187	0.378175	-0.119306	0.905033	0.981389
Asxl2	1535.27	0.0191094	0.335587	0.0569432	0.95459	0.989724
Asxl3	5.81645	-4.71333	4.25928	-1.1066	0.268466	NA
Atad1	3714.37	-0.131412	0.443702	-0.296171	0.767099	0.955199
Atad2	5468.81	-0.593133	0.627979	-0.94451	0.344909	0.787036
Atad2b	502.385	-0.588373	0.41692	-1.41124	0.158175	0.62574
Atad3a	1569.01	-0.263944	0.508575	-0.518986	0.60377	0.911535
Atad5	932.381	-0.765447	0.673283	-1.13689	0.255586	0.723785
Atat1	320.17	1.1169	0.587732	1.90035	0.0573868	0.40499
Ate1	935.593	-0.267844	0.371673	-0.720644	0.471128	0.855167
Atf1	1679.75	-0.0472992	0.326693	-0.144782	0.884883	0.978625
Atf2	2010.29	0.192029	0.322216	0.595963	0.5512	0.892106
Atf3	211.933	0.217489	0.953185	0.22817	0.819514	0.969426
Atf4	5077.49	1.29338	0.687752	1.88059	0.0600281	0.414927
Atf5	638.871	0.906214	0.925409	0.979258	0.327453	0.780699
Atf6	2472.46	-0.84389	0.371314	-2.27271	0.0230436	0.257335
Atf6b	1501.39	-0.17443	0.517364	-0.337152	0.736003	0.945097
Atf7	367.89	0.820699	0.497	1.65131	0.0986762	0.514682
Atf7ip	1743.69	-0.037608	0.370151	-0.101602	0.919073	0.982422
Atg10	85.7456	1.80401	0.934259	1.93095	0.0534889	0.392223
Atg12	635.415	-0.00670469	0.564956	-0.0118676	0.990531	0.998321
Atg13	776.403	0.830484	0.384228	2.16144	0.0306617	0.301885
Atg14	234.49	0.71646	0.550154	1.30229	0.192818	0.665553
Atg16l1	680.231	-0.0950089	0.487253	-0.194989	0.845401	0.974192
Atg16l2	116.416	0.0721656	0.6293	0.114676	0.908702	0.982407
Atg2a	1347.29	0.442141	0.346971	1.27429	0.202561	0.677044
Atg2b	1461.62	-0.46398	0.399749	-1.16068	0.245773	0.714582
Atg3	700.781	0.909081	0.529794	1.71591	0.0861781	0.487718
Atg4a	206.353	0.878745	0.527282	1.66656	0.0956024	0.507988
Atg4b	829.12	-0.0731231	0.415315	-0.176067	0.860242	0.974697
Atg4c	177.374	1.08203	0.790561	1.36868	0.171099	0.641424
Atg4d	291.362	0.0726472	0.497438	0.146043	0.883888	0.978625
Atg5	647.7	-0.292315	0.376662	-0.776067	0.437709	0.8401
Atg7	554.017	0.270144	0.647508	0.417206	0.676528	0.930196
Atg9a	816.211	0.306971	0.456195	0.672895	0.501014	0.866568
Atg9b	170.675	-0.459418	1.4897	-0.308397	0.75778	0.952622
Athl1	267.752	0.621038	0.609681	1.01863	0.30838	0.769125
Atic	7125.51	-0.553847	0.362593	-1.52746	0.126646	0.577319
Atl1	48.1106	2.93737	1.16251	2.52676	0.0115121	0.174625
Atl2	1267.18	-0.18116	0.337532	-0.536719	0.591462	0.907988
Atl3	4446.87	-0.0390568	0.484973	-0.080534	0.935813	0.985679
Atm	2862.96	0.15847	0.357795	0.442906	0.657834	0.924313
Atmin	636.577	0.0931059	0.500642	0.185973	0.852466	0.974267
Atn1	3940.72	0.212991	0.473647	0.449682	0.65294	0.923875
Atoh8	1454.96	0.704452	1.11923	0.629406	0.529083	0.879048
Atox1	866.562	-0.299072	0.434896	-0.687686	0.49165	0.861415
Atp10a	1081.73	-0.379345	0.72323	-0.524515	0.59992	0.910357
Atp10b	11.961	0.274517	1.66146	0.165226	0.868766	NA
Atp10d	62.3591	0.954687	0.874364	1.09187	0.274892	0.739778
Atp11a	2002.24	2.92388	0.941573	3.10531	0.00190078	0.0531784
Atp11b	1368.01	-0.510351	0.407046	-1.25379	0.209918	0.682709
Atp11c	652.57	-0.112846	0.554323	-0.203575	0.838686	0.973261
Atp13a1	2567.73	0.050486	0.312495	0.161558	0.871654	0.976227
Atp13a2	463.545	0.894274	0.413755	2.16136	0.0306675	0.301885
Atp13a3	4880.59	0.203221	0.468514	0.433756	0.664466	0.924795
Atp1a1	10537.6	-0.23733	0.379683	-0.625075	0.531922	0.880964
Atp1a2	3.47907	-0.541469	2.69233	-0.201115	0.840608	NA
Atp1a3	14.3476	-2.32235	1.91219	-1.2145	0.224558	0.698949
Atp1b1	1853.69	1.49751	0.664147	2.25479	0.0241463	0.263286
Atp1b2	45.4582	0.193356	0.988798	0.195546	0.844965	0.974192
Atp1b3	2921.17	-0.167348	0.395912	-0.42269	0.672522	0.928648
Atp2a1	3.17864	-0.552505	2.53203	-0.218207	0.827268	NA
Atp2a2	11313.7	-0.697614	0.283194	-2.46338	0.0137634	0.191436
Atp2a3	166.182	-6.34647	1.61484	-3.93008	8.49164e-05	0.00506433
Atp2b1	3040.31	-1.01443	0.551565	-1.83919	0.065887	0.430767
Atp2b4	272.363	3.5408	1.74142	2.03328	0.0420237	0.345944
Atp2c1	1737.58	-0.125679	0.32886	-0.382165	0.702339	0.938699
Atp2c2	16.7913	1.88449	1.77654	1.06076	0.288798	0.753168
Atp4a	29.207	-1.91378	3.269	-0.585433	0.558257	0.895233
Atp5a1	15822.9	-0.98387	0.532112	-1.84899	0.0644594	0.427376
Atp5b	19926.4	-0.504021	0.366714	-1.37442	0.16931	0.641259
Atp5c1	3957.65	-0.312577	0.341564	-0.915137	0.36012	0.793711
Atp5d	2459.95	-0.174662	0.313553	-0.557041	0.577499	0.902532
Atp5e	1056.38	-0.126388	0.41686	-0.303191	0.761744	0.953526
Atp5f1	3773.32	-0.702524	0.396563	-1.77153	0.076472	0.459885
Atp5g1	2664.36	0.401376	0.44847	0.89499	0.370793	0.801644
Atp5g2	2926.5	0.332689	0.349551	0.951761	0.341218	0.783866
Atp5g3	3712.83	-0.19323	0.411231	-0.469884	0.638438	0.9209
Atp5h	2899.64	-0.349626	0.454169	-0.769816	0.441409	0.842598
Atp5j	1592.82	-0.188194	0.400438	-0.469971	0.638376	0.9209
Atp5j2	2108.78	-0.54001	0.4091	-1.31999	0.186837	0.656775
Atp5k	436.946	-0.494074	0.473747	-1.04291	0.296991	0.762018
Atp5l	1810.42	0.102221	0.348723	0.29313	0.769423	0.955856
Atp5o	1923.41	-0.219589	0.494702	-0.443883	0.657127	0.924216
Atp5s	134.587	1.57944	0.732442	2.1564	0.0310521	0.30368
Atp5sl	291.255	0.314013	0.571224	0.54972	0.582511	0.904022
Atp6ap1	2827.43	0.1867	0.354251	0.527027	0.598175	0.910007
Atp6ap2	1322.96	0.994408	0.461365	2.15536	0.0311335	0.303805
Atp6v0a1	10086.7	1.74274	1.02262	1.70419	0.0883464	0.492083
Atp6v0a2	1060.17	-0.560595	0.378762	-1.48007	0.138854	0.598016
Atp6v0a4	83.3028	3.17342	0.822567	3.85795	0.000114342	0.0064126
Atp6v0b	1531.68	0.559009	0.361731	1.54537	0.122257	0.569375
Atp6v0c	90.3481	1.23335	0.886065	1.39194	0.16394	0.633479
Atp6v0c-ps2	6153.14	0.496308	0.291584	1.70211	0.0887348	0.492105
Atp6v0d1	1012.12	0.948823	0.35206	2.69506	0.00703756	0.128038
Atp6v0e	1661.09	0.0519449	0.401029	0.129529	0.896939	0.981345
Atp6v0e2	620.335	1.20663	1.00683	1.19845	0.230743	0.704033
Atp6v1a	1839.4	0.611949	0.423851	1.44379	0.148799	0.613565
Atp6v1b2	1475.75	0.549944	0.443584	1.23977	0.215059	0.690088
Atp6v1c1	1613.51	0.740871	0.38318	1.93348	0.0531772	0.391383
Atp6v1c2	59.7793	-5.09127	1.12222	-4.5368	5.71144e-06	0.000545532
Atp6v1d	956.579	0.640233	0.410193	1.56081	0.118569	0.560566
Atp6v1e1	1722.14	0.032195	0.526205	0.0611835	0.951213	0.988722
Atp6v1f	1338.49	0.198768	0.43869	0.453095	0.65048	0.922896
Atp6v1g1	1638.01	0.620358	0.507649	1.22202	0.2217	0.694985
Atp6v1g2	44.1836	0.0595471	0.962994	0.0618354	0.950694	0.988722
Atp6v1h	767.614	-0.0104933	0.567539	-0.0184891	0.985249	0.997279
Atp7a	672.972	0.70435	0.415805	1.69394	0.0902761	0.496275
Atp7b	23.9929	1.2271	1.35476	0.905769	0.365058	0.797638
Atp8a1	205.348	-0.100531	1.84159	-0.0545893	0.956466	0.990324
Atp8a2	14.8597	0.336104	2.38871	0.140705	0.888103	0.980191
Atp8b1	162.092	-3.42914	4.56625	-0.750977	0.452667	0.84846
Atp8b2	864.734	0.242131	0.647691	0.373837	0.708526	0.939886
Atp8b4	6.51399	0.115964	3.10487	0.0373492	0.970207	NA
Atp8b5	11.1366	2.91215	2.10475	1.38361	0.166479	NA
Atp9b	888.31	-0.539508	0.519858	-1.0378	0.299364	0.76346
Atpaf1	213.978	-0.363296	0.662687	-0.548216	0.583543	0.904329
Atpaf2	2499.15	-0.174465	0.648803	-0.268903	0.788005	0.959897
Atpbd4	666.813	0.505806	0.399566	1.26589	0.205552	0.679282
Atpif1	1650.93	0.134468	0.561172	0.23962	0.810625	0.966918
Atr	897.561	0.0670682	0.459925	0.145824	0.88406	0.978625
Atrip	251.361	0.348771	0.503716	0.692396	0.488688	0.860294
Atrn	1314.72	0.063471	0.464676	0.136592	0.891353	0.980651
Atrnl1	1335.91	-0.0361874	0.565333	-0.0640109	0.948962	0.98837
Atrx	4316.91	0.111963	0.327474	0.341898	0.732427	0.944268
Atxn1	422.339	-0.257194	0.688262	-0.373686	0.708638	0.939886
Atxn10	5582.48	0.984049	0.356403	2.76106	0.00576145	0.112703
Atxn1l	1551.64	0.332122	0.367748	0.903126	0.366459	0.798924
Atxn2	2044.46	-0.0249648	0.313975	-0.0795122	0.936625	0.985679
Atxn2l	3508.79	0.17294	0.399764	0.432605	0.665302	0.925153
Atxn3	758.942	0.0136879	0.382164	0.0358169	0.971428	0.994294
Atxn7	398.044	-0.0621613	0.52505	-0.118391	0.905758	0.981663
Atxn7l1	413.276	-0.948885	0.614041	-1.54531	0.12227	0.569375
Atxn7l2	302.842	-0.246838	0.523305	-0.47169	0.637148	0.920342
Atxn7l3	1108.51	-0.360536	0.44069	-0.818117	0.41329	0.826912
Atxn7l3b	1499.42	-0.333154	0.454526	-0.732971	0.463576	0.852639
Auh	189.621	0.846195	0.537244	1.57507	0.115241	0.554481
Aup1	3595.65	-0.150662	0.523814	-0.287626	0.773633	0.956385
Aurka	2160.82	-0.478717	0.681282	-0.702671	0.482261	0.856896
Aurkaip1	1005.13	0.295513	0.555215	0.53225	0.594553	0.909062
Aurkb	1411.13	-0.432828	0.764166	-0.566406	0.571118	0.900417
Auts2	20.8765	-7.9899	3.11922	-2.56151	0.0104219	0.162316
Aven	446.193	-0.829734	0.582784	-1.42374	0.154521	0.622463
Avil	36.6743	0.766851	1.1832	0.648115	0.51691	0.872638
Avl9	1331.71	0.282843	0.633055	0.446791	0.655026	0.92389
Avpi1	2662.49	1.74967	0.518701	3.37317	0.000743081	0.027282
Awat2	12.3673	2.02452	1.56113	1.29682	0.194692	NA
Axin1	1924.08	-0.110127	0.327507	-0.336259	0.736676	0.945376
Axin2	77.9963	1.24269	1.01963	1.21877	0.222933	0.697078
Axl	14745.7	-1.77626	0.605552	-2.9333	0.0033538	0.0776583
Azi1	375.911	-0.0680294	0.414334	-0.16419	0.869582	0.976227
Azi2	797.621	0.0269211	0.385129	0.0699017	0.944272	0.987569
Azin1	2497.5	-0.469062	0.508316	-0.922777	0.356123	0.793172
[truncated: 12,147 more rows]

## Sheet: RNAseq_stably_expr_genes
0610007N19Rik
0610009L18Rik
0610037L13Rik
0610038B21Rik
0610040F04Rik
100043387
1110001J03Rik
1110002N22Rik
1110006O24Rik
1110008J03Rik
1110008L16Rik
1110008P14Rik
1110017F19Rik
1110019D14Rik
1110032A03Rik
1110034G24Rik
1110038F14Rik
1110054M08Rik
1110059G10Rik
1190002H23Rik
1190005I06Rik
1190007I07Rik
1300002E11Rik
1500004A13Rik
1500011B03Rik
1500015A07Rik
1520402A15Rik
1600002H07Rik
1600002K03Rik
1600016N20Rik
1700001C19Rik
1700001G11Rik
1700001J11Rik
1700001L05Rik
1700003E16Rik
1700003M07Rik
1700007J10Rik
1700007L15Rik
1700007P06Rik
1700008J07Rik
1700009P17Rik
1700011J10Rik
1700012B09Rik
1700012B15Rik
1700016D06Rik
1700018A04Rik
1700019L03Rik
1700020D05Rik
1700021C14Rik
1700021K19Rik
1700024F13Rik
1700025K23Rik
1700025N23Rik
1700026L06Rik
1700027D21Rik
1700028J19Rik
1700028K03Rik
1700029I01Rik
1700029J07Rik
1700030J22Rik
1700034H15Rik
1700037C18Rik
1700040I03Rik
1700048O20Rik
1700049G17Rik
1700052K11Rik
1700056E22Rik
1700066B19Rik
1700066J24Rik
1700066M21Rik
1700084E18Rik
1700086O06Rik
1700092M07Rik
1700094D03Rik
1700096K18Rik
1700101E01Rik
1700109H08Rik
1700113A16Rik
1700113I22Rik
1700123M08Rik
1700128F08Rik
1810010H24Rik
1810014B01Rik
1810014F10Rik
1810019D21Rik
1810020D17Rik
1810020O05Rik
1810021B22Rik
1810026B05Rik
1810026J23Rik
1810027O10Rik
1810030N24Rik
1810032O08Rik
1810034E14Rik
1810035I16Rik
1810043H04Rik
1810044D09Rik
1810049H13Rik
1810062G17Rik
1810063B05Rik
1810063B07Rik
1810064F22Rik
2010001E11Rik
2010001M06Rik
2010002M12Rik
2010003K11Rik
2010003O02Rik
2010012O05Rik
2010015L04Rik
2010107H07Rik
2210009G21Rik
2210010C17Rik
2210015D19Rik
2210019I11Rik
2210021J22Rik
2210403K04Rik
2210404O07Rik
2210404O09Rik
2210408F21Rik
2210408I21Rik
2210417A02Rik
2210417K05Rik
2300009A05Rik
2310001H17Rik
2310002J15Rik
2310004I24Rik
2310009A05Rik
2310010J17Rik
2310014L17Rik
2310015A10Rik
2310030G06Rik
2310030N02Rik
2310034G01Rik
2310039L15Rik
2310040G24Rik
2310042D19Rik
2310043J07Rik
2310046O06Rik
2310047B19Rik
2310057M21Rik
2310061J03Rik
2310068J16Rik
2310079F23Rik
2400009B08Rik
2410002I01Rik
2410003K15Rik
2410004P03Rik
2410007B07Rik
2410017P09Rik
2410018L13Rik
2410018M08Rik
2410066E13Rik
2410075B13Rik
2410076I21Rik
2410124H12Rik
2510002D24Rik
2510009E07Rik
2510049J12Rik
2610008E11Rik
2610015P09Rik
2610019E17Rik
2610020C07Rik
2610020H08Rik
2610021K21Rik
2610029I01Rik
2610035D17Rik
2610037D02Rik
2610109H07Rik
2610206C17Rik
2610306M01Rik
2610307P16Rik
2610528A11Rik
2700023E23Rik
2700046G09Rik
2700097O09Rik
2810001G20Rik
2810013P06Rik
2810029C07Rik
2810030E01Rik
2810047C21Rik1
2810403D21Rik
2810405K02Rik
2810408A11Rik
2810410L24Rik
2810422O20Rik
2810429I04Rik
2810432D09Rik
2810442I21Rik
2810454H06Rik
2900002K06Rik
2900006K08Rik
2900009J06Rik
2900053A13Rik
2900076A07Rik
3000002C10Rik
3010026O09Rik
3110001I22Rik
3110009E18Rik
3110021N24Rik
3110040N11Rik
3110045C21Rik
3110052M02Rik
3110056K07Rik
3110057O12Rik
3300002I08Rik
3830408C21Rik
3930402G23Rik
4632428C04Rik
4732415M23Rik
4732471J01Rik
4732491K20Rik
4831440E17Rik
4833427F10Rik
4921506M07Rik
4921508A21Rik
4921513I03Rik
4921515E04Rik
4921515J06Rik
4921523A10Rik
4921530D09Rik
4921530L18Rik
4921531C22Rik
4921536K21Rik
4930404N11Rik
4930405P13Rik
4930412C18Rik
4930413G21Rik
4930414L22Rik
4930432K21Rik
4930441O14Rik
4930451C15Rik
4930452B06Rik
4930461G14Rik
4930467E23Rik
4930481A15Rik
4930503E14Rik
4930509E16Rik
4930511M06Rik
4930513N10Rik
4930515G01Rik
4930519F09Rik
4930524L23Rik
4930525G20Rik
4930528D03Rik
4930539E08Rik
4930539J05Rik
4930550C14Rik
4930556M19Rik
4930558J18Rik
4930562C15Rik
4930562F07Rik
4930563E22Rik
4930565N06Rik
4930578N16Rik
4930579G18Rik
4930581F22Rik
4931408D14Rik
4931414P19Rik
4931417G12Rik
4931428L18Rik
4932415G12Rik
4932416H05Rik
4933404K08Rik
4933405D12Rik
4933407K13Rik
4933408B17Rik
4933408N05Rik
4933411E08Rik
4933411K16Rik
4933421O10Rik
4933430H15Rik
4933432B09Rik
4933433H22Rik
4933433P14Rik
4933436C20Rik
4933437F05Rik
4933439C10Rik
5031425E22Rik
5031426D15Rik
5031434O11Rik
5033406O09Rik
5033411D12Rik
5133401N09Rik
5330426P16Rik
5430405H02Rik
5430427M07Rik
5430427O19Rik
5430435G22Rik
5730408K05Rik
5730480H06Rik
5730528L13Rik
5730577I03Rik
5830415F09Rik
5830433M19Rik
6030408B16Rik
6030422M02Rik
6030440G07Rik
6030446N20Rik
6230400D17Rik
6330403K07Rik
6330406I15Rik
6330408A02Rik
6330409D20Rik
6330418K02Rik
6330439K17Rik
6330512M04Rik
6330545A04Rik
6330549D23Rik
6430531B16Rik
6430548G04
6430548M08Rik
6430550D23Rik
6430571L13Rik
6530401N04Rik
6720489N17Rik
7530420F21Rik
8030423F21Rik
8030442B05Rik
8430408G22Rik
8430419L09Rik
8430429K09Rik
9030425E11Rik
9030624G23Rik
9030625A04Rik
9130019O22Rik
9130023H24Rik
9130024F11Rik
9130221F21Rik
9130221H12Rik
9130230L23Rik
9130409I23Rik
9230114K14Rik
9230116N13Rik
9330020H09Rik
9330133O14Rik
9330151L19Rik
9330158H04Rik
9330159M07Rik
9330179D12Rik
9430018G01Rik
9430037G07Rik
9430038I01Rik
9430091E24Rik
9530008L14Rik
9530027J09Rik
9530051G07Rik
9530053A07Rik
9530077C05Rik
9530091C08Rik
9830132P13
9930005F22Rik
9930013L23Rik
9930014A18Rik
9930104L06Rik
9930111J21Rik2
A030009H04Rik
A130049A11Rik
A230051G13Rik
A230056P14Rik
A230072C01Rik
A230072E10Rik
A330009N23Rik
A330023F24Rik
A330032B11Rik
A330035P11Rik
A330049M08Rik
A330050B17Rik
A430005L14Rik
A430033K04Rik
A430078G23Rik
A430107P09Rik
A430110N23Rik
A530054K11Rik
A530072M11Rik
A630001G21Rik
A630020A06
A630023A22Rik
A630033H20Rik
A630066F11Rik
A630072M18Rik
A630075F10Rik
A730020M07Rik
A730037C10Rik
A730082K24Rik
A730090H04Rik
A730098P11Rik
A830018L16Rik
A830052D11Rik
A830082K12Rik
A830082N09Rik
A930005H10Rik
A930005I04Rik
A930007I19Rik
A930012L18Rik
A930013F10Rik
A930015D03Rik
A930024E05Rik
AA388235
AA415398
AA467197
AA474331
AA543186
AA987161
AF366264
AI115009
AI182371
AI414108
AI428936
AI450353
AI506816
AI607873
AI836003
AK129341
AU021092
AU022252
AU022754
AU023762
AU041133
AW046200
AY512931
Aasdh
Aass
Abca13
Abca4
Abca8b
Abcb9
Abcc2
Abcc8
Abcd2
Abcg1
Abcg4
Abhd1
Abhd10
Abhd15
Abhd16b
Abhd3
Ablim2
Ablim3
Abtb2
Acaa1b
Acad12
Acad8
Acap1
Acat3
Acbd6
Accs
Ache
Acmsd
Acn9
Acnat2
Acot1
Acot11
Acot8
Acox2
Acsf3
Acsl6
Acsm3
Acta1
Actn3
Actr5
Actr6
Actr8
Acvr2b
Acyp2
Adam11
Adam12
Adam19
Adam1a
Adam22
Adam28
Adam32
Adam33
Adam4
Adam8
Adamts1
Adamts14
Adamts17
Adamts4
Adamts7
Adap2
Adat1
Adat2
Adat3
Adck3
Adcy3
Adcyap1
Adhfe1
Adm
Adora2a
Adprhl2
Afap1l2
Agap2
Agbl3
Ager
Aim1l
Ak1
Akap10
Akap5
Akap6
Akap7
Akna
Akr1b10
Akr1c14
Akr7a5
Aldh1a3
Aldh1a7
Aldh1b1
Aldh1l1
Aldh3b1
Aldoart1
Alg12
Alg14
Alg9
Alkbh1
Alkbh4
Alkbh6
Alkbh8
Alox8
Alpi
Als2cr12
Alyref2
Amdhd1
Amhr2
Amigo3
Amn
Amz1
Angel1
Angpt2
Angptl7
Ankdd1b
Ankrd34a
Ankrd35
Ankrd37
Ankrd39
Ankrd42
Ankrd44
Ankrd5
Ankrd6
Ankrd61
Anks3
Anks4b
Ano7
Ano9
Anpep
Anubl1
Ap4b1
Ap4m1
Ap4s1
Apbb1ip
Apc2
Apoa1
Apoa2
Apoe
Apol11b
Apol7b
Apol7d
Apol7e
Apol9b
Apold1
Apon
Apool
Aqp11
Arhgap24
Arhgap26
Arhgap28
Arhgap32
Arhgap33
Arhgap4
Arhgap40
Arhgap9
Arhgef4
Arhgef9
Arid5a
Arl10
Arl16
Arl4d
Arl5c
Armc2
Armc5
Armc7
Armcx5
Arsg
Arsi
Arsj
Artn
Arv1
As3mt
Asap3
Asb4
Asgr1
Aste1
Asxl3
Atg16l2
Atg4d
Atp10b
Atp10d
Atp1a3
Atp1b2
Atp2c2
Atp4a
Atp6v1g2
Atp7b
Atp8a2
Atp8b4
Atp8b5
Auts2
Avil
Awat2
Azi1
B020014A21Rik
B230118H07Rik
B230206H07Rik
B230216N24Rik
B230217C12Rik
B230217O12Rik
B330016D10Rik
B3galt4
B3galt6
B3gat2
B3gnt9-ps
B430319G15Rik
B4galnt2
B630019K06Rik
B930041F14Rik
B930059L03Rik
B9d2
BB283400
BC005561
BC005764
BC017612
BC020402
BC021614
BC021785
BC022687
BC024386
BC024978
BC025920
BC026585
BC029214
BC030307
BC030336
BC031361
BC033916
BC037034
BC037704
BC039771
BC039966
BC052040
BC052688
BC053749
BC060267
BC064078
BC065397
BC067068
BC068157
BC068281
BC090627
BC096441
BC100451
BC125332
Baalc
Bach1
Bach2
Bambi
Bambi-ps1
Banp
Batf3
Bbs1
Bbs10
Bbs5
Bcdin3d
Bche
Bcl10
Bcl11b
Bcl7b
Bcs1l
Bdh1
Bdh2
Bend6
Bend7
Bet1l
Bfsp1
Bmp8a
Bmyc
Bnip1
Bnipl
Bola1
Bpifb4
Bpifc
Brdt
Brf2
Brsk1
Bsn
Btbd16
Btbd17
Btbd8
Bud13
C030034I22Rik
C030037D09Rik
C030039L03Rik
C030048B08Rik
C130036L24Rik
C130083M11Rik
C1qtnf1
C1s
C2cd2
C2cd2l
C2cd4c
C330024D21Rik
C430002E04Rik
C430049B03Rik
C4a
C4b
C4bp
C530005A16Rik
C730027H18Rik
C78339
C8g
C920006O11Rik
Cabp4
Cacna1h
Cacna1i
Cacnb1
Cacng7
Cadps
Cadps2
Cage1
Calcoco2
Calhm2
Calr3
Camk2a
Camk4
Camkk1
Camta1
Capn12
Car14
Car15
Car7
Car9
Carf
Carns1
Casc1
Caskin1
Casp12
Casp7
Cass4
Casz1
Catsper2
Cbfa2t3
Cbll1
Cbln3
Cbr3
Cbr4
Cbs
Cbx8
Ccbe1
Ccbl2
Ccdc103
Ccdc106
Ccdc116
Ccdc120
Ccdc122
Ccdc126
Ccdc134
Ccdc138
Ccdc141
Ccdc142
Ccdc148
Ccdc149
Ccdc15
Ccdc151
Ccdc163
Ccdc164
Ccdc17
Ccdc23
Ccdc24
Ccdc28b
Ccdc3
Ccdc36
Ccdc38
Ccdc39
Ccdc40
Ccdc48
Ccdc51
Ccdc55
Ccdc57
Ccdc59
Ccdc61
Ccdc62
Ccdc63
Ccdc65
Ccdc73
Ccdc74a
Ccdc76
Ccdc78
Ccdc84
Ccdc88b
Ccdc90a
Ccdc90b
Ccdc94
Ccdc96
Cck
Cckbr
Ccl2
Ccl27a
Ccr10
Ccr7
Cd200r2
Cd209c
Cd22
Cd248
Cd274
Cd36
Cd68
Cd84
Cd8a
Cd93
Cdc42ep3
Cdh10
Cdh11
Cdh16
Cdh24
Cdh5
Cdk20
Cdk5r1
Cdkl3
Cdnf
Cdo1
Ceacam1
Ceacam16
Ceacam19
Cecr2
Cela1
Celsr3
Cenpj
Cep63
Cep70
Cep72
Ces1a
Ces1f
Cetn4
Cfp
Cftr
Cgrrf1
Chchd8
Chd5
Chfr
Chmp2a
Chrd
Chrm1
Chrna1
Chrna2
Chrnb2
Chrnb4
Chst12
Chst3
Chst7
Chst8
Cib2
Cideb
Cirbp
Cish
Cklf
Clca2
Clca3
Clca4
Clca6
Clcn1
Clcn2
Cldn1
Cldn18
Cldn20
Cldn4
Cldn7
Clec16a
Clec2e
Clec2g
Clec2h
Clec2l
Clec4a1
Clic3
Clip3
Clp1
Clstn3
Clybl
Cml1
Cnih2
Cnksr2
Cno
Cnr2
Cntd1
Cntf
Coch
Coil
Col11a2
Col12a1
Col15a1
Col16a1
Col3a1
Col4a3
Col9a3
Colec11
Colec12
Commd5
Comp
Comtd1
Copz2
Coq3
Coq4
Coro6
Cox11
Cox16
Cox18
Cox19
Cox7a1
Cpeb3
Cplx2
Cpn1
Cpne4
Cpne7
Cpne9
Cpped1
Cpsf4l
Cpt1b
Cpt2
Cpxm1
Crabp2
Cradd
Crcp
Creb3l3
Creb3l4
Crem
Crisp1
Crtc2
Crx
Cryl1
Csf2
Csn3
Cspg4
Csrnp1
Csrnp2
Ctf1
Cthrc1
Ctla2a
Ctrl
Ctsf
Ctso
Ctsw
Ctu1
Cul9
Cwf19l2
Cx3cr1
Cxcl10
Cxcl2
Cxcr5
Cyb561d1
Cyb561d2
Cyb5d1
Cyb5d2
Cyb5rl
Cybrd1
Cyfip2
Cyp21a1
Cyp27b1
Cyp2c55
Cyp2c68
Cyp2e1
Cyp2j13
Cyp2j5
Cyp2j6
Cyp2u1
Cyp4f14
Cyp4f41-ps
Cysltr1
Cyth1
Cyth4
D030040B21Rik
D11Wsu47e
D130017N08Rik
D130020L05Rik
D130040H23Rik
D16H22S680E
D17Ertd648e
D17H6S53E
D17H6S56E-3
D330012F22Rik
D330022K07Rik
D330023K18Rik
D330028D13Rik
D330041H03Rik
D330045A20Rik
D330050I16Rik
D3Ertd751e
D5Ertd605e
D630003M21Rik
D630029K05Rik
D630039A03Rik
D630045M09Rik
D6Ertd527e
D6Mm5e
D730005E14Rik
D730039F16Rik
D830005E20Rik
D830031N03Rik
D930016D06Rik
D930028M14Rik
D930032P07Rik
D930048N14Rik
D9Ertd402e
Daam2
Dact1
Dact3
Dapk2
Dbndd1
Dcdc2c
Dclk1
Dclk2
Dcxr
Ddb2
Ddit4l
Ddn
Ddr2
Ddx28
Ddx4
Ddx59
Dedd2
Dennd1c
Dennd2c
Dennd2d
Det1
Dexi
Dffa
Dffb
Dgcr14
Dgkq
Dhdh
Dhrs11
Dhx58
Dkk3
Dleu2
Dlgap1
Dll1
Dll4
Dlx1as
Dmbt1
Dmd
Dmpk
Dmrt3
Dnahc11
Dnahc17
Dnahc2
Dnahc7a
Dnaic2
Dnaja4
Dnajb13
Dnajb5
Dnajc12
Dnajc17
Dnajc24
Dnajc27
Dnajc28
Dnajc30
Dnase1
Dnase1l1
Dnase1l2
Dnd1
Dnmt3b
Doc2a
Doc2b
Doc2g
Dok2
Dok3
Dok7
Dolpp1
Dom3z
Dpep2
Dpf1
Dph5
Dppa2
Drp2
Dsc2
Dtwd2
Dub1
Dusp19
Dusp2
Dusp23
Dusp28
Dusp8
Dynlt1b
Dynlt1e
Dynlt1f
Dysf
E030011O05Rik
E130003G02Rik
E130008D07Rik
E130112N10Rik
E130307A14Rik
E130311K13Rik
E130317F20Rik
E230008N13Rik
E230016K23Rik
E230016M11Rik
E230025N22Rik
E2f2
E330020D12Rik
E330023G01
E330033B04Rik
E430018J23Rik
E530011L22Rik
Eaf2
Eapp
Ears2
Ebf4
Ece2
Ecm2
Ecscr
Eda
Edn1
Efcab2
Efcab3
Efcab4a
Efcab5
Efcab7
Efcab8
Efhc1
Efna2
Efna3
Efna4
Efnb3
Efr3b
Egf
Egflam
Egr2
Ehhadh
Eid2
Eid2b
Eid3
Eif2c4
Eif4ebp3
Elavl2
Ell3
Elovl4
Eme2
Endog
Eng
Engase
Enho
Enkur
Eno2
Eno4
Enox
Enpp2
Entpd2
Entpd8
Epb4.2
Epb4.9
Epcam
Epha1
Ephb3
Epor
Eps8l1
Erc2
Ercc8
Ermap
Espnl
Esr1
Esr2
Esx1
Etnk2
Etohd2
Etv1
Evi2a
Evi5l
Exd1
Exoc3l
Exog
Exosc4
F420014N23Rik
F5
F630042J09Rik
F630110N24Rik
F8
F830016B08Rik
F8a
Fa2h
Faah
Fabp2
Fads6
Fahd1
Fahd2a
Fam108a
Fam109a
Fam109b
Fam113b
Fam115c
Fam118b
Fam122b
Fam124a
Fam129c
Fam131a
Fam131b
Fam132a
Fam151b
Fam154b
Fam158a
Fam160b2
Fam161a
Fam161b
Fam164c
Fam165b
Fam167a
Fam169b
Fam176a
Fam176b
Fam187b
Fam188a
Fam188b
Fam18a
Fam23a
Fam25c
Fam26e
Fam35a
Fam40b
Fam53b
Fam55d
Fam57a
Fam57b
Fam69b
Fam71f1
Fam71f2
Fam72a
Fam78b
Fam81a
Fam82b
Fam83a
Fam83e
Fam89a
Fan1
Fancc
Fancf
Fancl
Far2
Fas
Fat4
Fbln5
Fbn1
Fbp2
Fbxl15
Fbxl21
Fbxl22
Fbxo24
Fbxo34
Fbxo41
Fbxo47
Fbxo48
Fbxo7
Fbxw10
Fbxw17
Fbxw9
Fcgrt
Fdxacb1
Fdxr
Fer1l4
Fermt3
Fes
Fetub
Fgf11
Fgf15
Fgf18
Fgf7
Fgfbp1
Fgfbp3
Fgl1
Fhit
Fhl1
Ficd
Figf
Fjx1
Fkbp1b
Fkbpl
Flt3l
Flywch2
Fmo4
Fmo9
Fntb
Foxa3
Foxd2
Foxj1
Foxn1
Foxo3
Foxo6
Foxr1
Foxred1
Fpgt
Frat1
Fry
Fsbp
Fsd1
Ftsj2
Fuca1
Fuca2
Fundc2
Fut2
Fuz
Fxyd3
Fzd3
Fzd8
Fzd9
G530011O06Rik
G630016D24Rik
G630025P09Rik
G630055G22Rik
G630090E17Rik
G730013B05Rik
Gab3
Gabra1
Gabrb2
Gabre
Gad2
Gal3st3
Gal3st4
Galnt14
Galnt9
Galntl4
Galntl6
Galr2
Gamt
Gan
Gas2
Gas6
Gata2
Gata3
Gbp2
Gch1
Gdap10
Gdf1
Gdf11
Gdpd2
Gfod2
Gfra2
Ggn
Gimap1
Gimap8
Gimap9
Gin1
Gja4
Gjb1
Gjc3
Gk5
Gkn1
Glb1l
Glipr2
Glis1
Glmn
Glra2
Glrb
Glt1d1
Glt28d2
Glyctk
Gm10033
Gm10324
Gm10345
Gm10389
Gm10416
Gm10432
Gm10433
Gm10509
Gm10516
Gm10548
Gm10560
Gm10653
Gm10658
Gm10662
Gm10664
Gm10677
Gm10767
Gm10778
Gm10785
Gm10789
Gm10791
Gm10814
Gm10825
Gm10941
Gm11110
Gm11127
Gm1141
Gm11517
Gm11602
Gm11627
Gm11696
Gm11818
Gm11944
Gm11974
Gm12185
Gm12504
Gm12657
Gm12824
Gm12942
Gm13051
Gm13139
Gm13152
Gm13242
Gm13275
Gm13278
Gm13476
Gm13845
Gm14023
Gm14047
Gm14057
Gm14124
Gm14139
Gm14204
Gm14288
Gm14308
Gm14318
Gm14327
Gm14378
Gm14391
Gm14393
Gm14405
Gm14431
Gm14435
Gm14827
Gm14872
Gm15319
Gm15401
Gm15417
Gm15441
Gm15455
Gm15545
Gm15663
Gm15708
Gm15760
Gm16023
Gm16062
Gm16119
Gm16197
Gm16386
Gm16516
Gm16523
Gm16576
Gm16596
Gm166
Gm16617
Gm16675
Gm1673
Gm16793
Gm16796
Gm16845
Gm16853
Gm16861
Gm16880
Gm16907
Gm16973
Gm17066
Gm17762
Gm1821
Gm19434
Gm19510
Gm19589
Gm19619
Gm19705
Gm19757
Gm19782
Gm20125
Gm20172
Gm20199
Gm20257
Gm2027
Gm20324
Gm20337
Gm20362
Gm20597
Gm221
Gm2381
Gm2382
Gm2518
Gm2694
Gm3219
Gm3336
Gm3414
Gm3435
Gm3604
Gm3716
Gm3833
Gm4013
Gm4070
Gm4262
Gm4285
Gm4787
Gm4791
Gm4890
Gm5065
Gm5069
Gm5088
Gm5113
Gm5141
Gm527
Gm5431
Gm5465
Gm5512
Gm5523
Gm5531
Gm5577
Gm5595
Gm5607
Gm5617
Gm5622
Gm5820
Gm5860
Gm5887
Gm5918
Gm6086
Gm6225
Gm6307
Gm6313
Gm6525
Gm6531
Gm6602
Gm6634
Gm6654
Gm6787
Gm6907
Gm6981
Gm7102
Gm7444
Gm7609
Gm805
Gm8234
Gm8267
Gm88
Gm885
Gm8898
Gm9079
Gm9159
Gm9199
Gm9766
Gm9781
Gm9897
Gm9920
Gm9958
Gmppb
Gmpr
Gnal
Gnaz
Gnb1l
Gng13
Gng3
Gng4
Gngt2
Gnrh1
Gp1ba
Gpa33
Gpank1
Gpatch1
Gpatch3
Gpc2
Gpn2
Gpr115
Gpr141
Gpr146
Gpr155
Gpr157
Gpr160
Gpr161
Gpr162
Gpr173
Gpr179
Gpr182
Gpr3
Gpr35
Gpr4
Gpr63
Gpr68
Gpr98
Gprc5c
Gpsm3
Gramd1c
Gramd3
Grap
Greb1
Grhl1
Grhl2
Grik4
Grin1
Grin2d
Grin3b
Grip1
Grk1
Gsg1
Gstm2
Gstm6
Gstm7
Gstp2
Gt(ROSA)26Sor
Gtf2ird2
Gtpbp6
Guca1a
Guca1b
Guca2a
Gucy1a2
Gucy2g
Guk1
Gxylt2
Gyltl1b
Gzme
H19
H2-DMa
H2-K2
H2-Ke2
H2-M3
H2-Q4
H2-Q8
H2-T10
H2afy3
Habp2
Hal
Hao1
Harbi1
Havcr2
Hba-a1
Hbq1b
Hcfc2
Hcls1
Hcrtr1
Hddc3
Hdhd3
Hebp2
Hectd2
Hecw1
Heg1
Helb
Hemk1
Heph
Herc6
Hes7
Hexim2
Hey1
Hfe
Hhat
Hic1
Hic2
Hint2
Hint3
Hipk4
Hist1h1d
Hist1h1e
Hist1h2ac
Hist1h2ad
Hist1h2ae
Hist1h2ag
Hist1h2ao
Hist1h2be
Hist1h2bg
Hist1h2bq
Hist1h2br
Hist1h3b
Hist1h3c
Hist1h3d
Hist1h3g
Hist1h4h
Hist1h4i
Hist1h4n
Hist2h2aa1
Hist2h2aa2
Hist2h2be
Hist2h3b
Hist2h3c1
Hist2h3c2
Hist3h2a
Hist3h2ba
Hist4h4
Hkdc1
Hmgcs2
Hmx2
Homez
Hoxa10
Hoxa2
Hoxa4
Hoxa5
Hoxb3
Hoxb5
Hoxb6
Hoxb7
Hoxc4
Hoxc5
Hoxc8
Hoxc9
Hp
Hpdl
Hpgd
Hpgds
Hps4
Hpse
Hpx
Hrct1
Hrk
Hsd11b2
Hsd17b13
Hsd3b7
Hsf2bp
Hsf4
Hsf5
Hspa12a
Hspa12b
Hspa1l
Hspbap1
Htr1b
Htra3
Htra4
Hvcn1
Hyal1
Hyal3
Hydin
Hyls1
Ica1l
Icam4
Icam5
Icosl
Ido1
Ifi203
Ifi205
Ifi27l1
Ifih1
Ifitm3
Ift88
Igf1
Igfbp6
Ighmbp2
Igsf6
Igsf9b
Igtp
Ihh
Ikzf2
Ikzf4
Il11
Il12rb1
Il12rb2
Il13ra1
Il15
Il17d
Il17rc
Il17re
Il18bp
Il18r1
Il1f9
Il1rap
Il1rl1
Il1rn
Il20rb
Il27ra
Il2ra
Il2rg
Il6ra
Il7
Immp1l
Impg2
Inca1
Ino80b
Insl3
Insl6
Insm1
Iqcd
Iqcg
Iqck
Irf8
Irgm2
Irx1
Isg15
Isl2
Islr
Islr2
Isoc2b
Ispd
Itfg2
Itga10
Itgae
Itgb1bp1
Itgb2
Itgb3bp
Itgb8
Itpka
Ivl
Izumo4
Jmjd7
Jph4
Jrk
Katnal2
Kazn
Kbtbd10
Kbtbd3
Kcnd1
Kcne3
Kcnip4
Kcnj14
Kcnk10
Kcnk2
Kcnk6
Kcnn3
Kctd1
Kctd14
Kctd15
Kctd21
Kdm4b
Kdr
Kif24
Kif26a
Kif26b
Kif27
Kif5a
Kif7
Kif9
Kin
Kiss1r
Kit
Klb
Klc3
Klhdc7a
Klhdc8b
Klhdc9
Klhl15
Klhl18
Klhl25
Klhl28
Klhl30
Klhl36
Klra19
Klra2
Kng1
Kng2
Kptn
Krt10
Krt14
Krt27
Krt6a
Krt78
Krt79
Krtap1-5
L3mbtl4
LOC100503496
LOC100504703
LOC100642166
LOC106740
LOC330599
LOC624759
Lace1
Lag3
Lamc3
Lancl3
Lass3
Lat2
Layn
Lcat
Lce1g
Lck
Lcn2
Lct
Ldoc1l
Lekr1
Lenep
Leng1
Leng9
Leprel2
Letm2
Lgals8
Lgi4
Lhpp
Lhx6
Lilrb4
Limch1
Lin37
Lin52
Lingo1
Lingo3
Lipe
Lipg
Lipi
Lipt1
Lipt2
Lix1
Lman1l
Lman2l
Lmcd1
Lmtk3
Lnx1
Loh12cr1
Lor
Lpcat2
Lpin3
Lpxn
Lrch4-sap25
Lrfn1
Lrmp
Lrpap1
Lrrc14
Lrrc14b
Lrrc15
Lrrc16b
Lrrc17
Lrrc2
Lrrc24
Lrrc28
Lrrc29
Lrrc33
Lrrc39
Lrrc46
Lrrc48
Lrrc56
Lrrc66
Lrrc8e
Lrrn3
Lrrn4cl
Lrtm2
Ltbp2
Ltk
Ly6c2
Ly6g5b
Ly96
Lypd6b
Lyrm1
Lyrm2
Lyrm4
Lysmd1
Lysmd3
Lysmd4
Lyz2
Macc1
Macrod2
Maf
Mafa
Mafb
Mageb16-ps1
Magi2
Magix
Mal2
Mamdc4
Mamld1
Mamstr
Man1c1
Mansc1
Maob
Map3k15
Map3k8
Map6d1
Mapk15
Mapk1ip1
Mapk4
Mapk8ip2
2021-03-04
Marcksl1-ps4
Marveld2
Mast1
Matn3
Matn4
Mblac1
Mblac2
Mboat4
Mcart6
Mcpt8
Mctp1
Mdga1
Me3
Med18
Med27
Med6
Mef2b
Mef2c
Megf11
Megf6
Megf9
Meis1
Mep1a
Mesp2
Mettl15
Mettl17
Mettl2
Mettl22
Mettl5
Mfsd2b
Mfsd8
Mfsd9
Mgam
Mgat5
Mgmt
Micalcl
Mitd1
Mitf
Mkks
Mks1
Mlxipl
Mmaa
Mme
Mmp10
Mmp13
Mmp19
Mmp23
Mmp3
Mnat1
Mndal
Moap1
[truncated: 1,184 more rows]

## Sheet: Stably_ExprGene_ATATC_TSS_peaks
chr	start	end	annotation	SYMBOL
chr1	9690006	9691160	Promoter (<=1kb)	Mybl1
chr1	12981003	12982975	Promoter (<=1kb)	Slco5a1
chr1	16677919	16679592	Promoter (<=1kb)	Ly96
chr1	20941293	20942087	Promoter (<=1kb)	Efhc1
chr1	21068769	21070733	Promoter (<=1kb)	Tram2
chr1	21208418	21209104	Promoter (<=1kb)	Tmem14a
chr1	34858255	34859488	Promoter (<=1kb)	Arhgef4
chr1	36364260	36365028	Promoter (<=1kb)	Arid5a
chr1	36501678	36502472	Promoter (<=1kb)	Lman2l
chr1	36603775	36604504	Promoter (<=1kb)	Ankrd39
chr1	37928450	37930429	Promoter (<=1kb)	Lipt1
chr1	39534953	39535954	Promoter (<=1kb)	Tbc1d8
chr1	40846689	40847873	Promoter (<=1kb)	Mfsd9
chr1	52687296	52688365	Promoter (<=1kb)	Tmem194b
chr1	54982492	54983646	Promoter (<=1kb)	Ankrd44
chr1	55462529	55463182	Promoter (<=1kb)	Plcl1
chr1	57434108	57435219	Promoter (<=1kb)	1700066M21Rik
chr1	58749151	58749716	Promoter (<=1kb)	Als2cr12
chr1	59029854	59031143	Promoter (<=1kb)	Stradb
chr1	59219658	59220295	Promoter (<=1kb)	Mpp4
chr1	60099523	60100276	Promoter (<=1kb)	Ica1l
chr1	60154447	60155604	Promoter (<=1kb)	Carf
chr1	72258402	72259135	Promoter (<=1kb)	Mreg
chr1	74634141	74635103	Promoter (<=1kb)	Bcs1l
chr1	74647351	74648287	Promoter (<=1kb)	Stk36
chr1	74795249	74796274	Promoter (<=1kb)	Prkag3
chr1	75120899	75121997	Promoter (<=1kb)	Nhej1
chr1	75475320	75476390	Promoter (<=1kb)	Tmem198
chr1	87632453	87633420	Promoter (<=1kb)	A630001G21Rik
chr1	89470350	89471833	Promoter (<=1kb)	Neu2
chr1	92865841	92866233	Promoter (<=1kb)	Rab17
chr1	94803269	94804240	Promoter (<=1kb)	Dusp28
chr1	95202201	95202745	Promoter (<=1kb)	Mterfd2
chr1	107252740	107253602	Promoter (<=1kb)	Rnf152
chr1	108757457	108757825	Promoter (<=1kb)	Serpinb5
chr1	121733456	121734506	Promoter (<=1kb)	Ptpn4
chr1	121970165	121971176	Promoter (<=1kb)	Tmem37
chr1	129101275	129103155	Promoter (<=1kb)	Mgat5
chr1	132557995	132558409	Promoter (<=1kb)	C4bp
chr1	133423025	133425629	Promoter (<=1kb)	Fam72a
chr1	133763574	133764235	Promoter (<=1kb)	Rab7l1
chr1	135259855	135260551	Promoter (<=1kb)	Etnk2
chr1	136851560	136852828	Promoter (<=1kb)	Ppp1r12b
chr1	138311546	138312318	Promoter (<=1kb)	9230116N13Rik
chr1	156992829	156994171	Promoter (<=1kb)	Mr1
chr1	157405029	157405926	Promoter (<=1kb)	Acbd6
chr1	159388450	159388765	Promoter (<=1kb)	BC026585
chr1	172207100	172207666	Promoter (<=1kb)	Sh2d1b1
chr1	172519377	172520272	Promoter (<=1kb)	Nos1ap
chr1	173431606	173434225	Promoter (<=1kb)	Alyref2
chr1	174562582	174563524	Promoter (<=1kb)	Dusp23
chr1	175809793	175810828	Promoter (<=1kb)	Mndal
chr1	175872073	175873142	Promoter (<=1kb)	Ifi203
chr1	175961777	175962458	Promoter (<=1kb)	Ifi205
chr1	177622230	177623424	Promoter (<=1kb)	Opn3
chr1	180335583	180337025	Promoter (<=1kb)	Efcab2
chr1	180457346	180459332	Promoter (<=1kb)	Kif26b
chr1	182125354	182126479	Promoter (<=1kb)	Adck3
chr1	188529002	188530859	Promoter (<=1kb)	Tgfb2
chr1	192878881	192879560	Promoter (<=1kb)	Tatdn3
chr1	193916000	193917160	Promoter (<=1kb)	Traf5
chr1	193960325	193962713	Promoter (<=1kb)	Gm10516
chr1	194596410	194597488	Promoter (<=1kb)	Hhat
chr1	196842840	196844695	Promoter (<=1kb)	A330023F24Rik
chr10	4521363	4522883	Promoter (<=1kb)	Mtrf1l
chr10	13220671	13221192	Promoter (<=1kb)	Fuca2
chr10	18265141	18266113	Promoter (<=1kb)	Hebp2
chr10	21878095	21879092	Promoter (<=1kb)	Raet1a
chr10	30337766	30338615	Promoter (<=1kb)	Hint3
chr10	33815938	33816674	Promoter (<=1kb)	Fam26e
chr10	34016980	34017667	Promoter (<=1kb)	Tspyl4
chr10	39618598	39619321	Promoter (<=1kb)	AA474331
chr10	39679591	39680407	Promoter (<=1kb)	G630090E17Rik
chr10	41169760	41170598	Promoter (<=1kb)	Zbtb24
chr10	41209312	41210482	Promoter (<=1kb)	Smpd2
chr10	41737891	41738414	Promoter (<=1kb)	Armc2
chr10	41995485	41998264	Promoter (<=1kb)	Foxo3
chr10	42197856	42198648	Promoter (<=1kb)	Lace1
chr10	43620839	43621837	Promoter (<=1kb)	Rtn4ip1
chr10	57959430	57961168	Promoter (<=1kb)	Ccdc138
chr10	58683815	58685092	Promoter (<=1kb)	2021-09-10
chr10	62382956	62383863	Promoter (<=1kb)	Slc25a16
chr10	62844420	62845815	Promoter (<=1kb)	Dnajc12
chr10	62849134	62849747	Promoter (<=1kb)	Dnajc12
chr10	66747198	66748471	Promoter (<=1kb)	Nrbf2
chr10	67000001	67000742	Promoter (<=1kb)	Egr2
chr10	67375096	67375602	Promoter (<=1kb)	Zfp365
chr10	67442000	67442707	Promoter (<=1kb)	Rtkn2
chr10	74429540	74430147	Promoter (<=1kb)	Gnaz
chr10	74499573	74500241	Promoter (<=1kb)	Rab36
chr10	77531753	77532620	Promoter (<=1kb)	Icosl
chr10	78559942	78560620	Promoter (<=1kb)	2610008E11Rik
chr10	79208923	79209604	Promoter (<=1kb)	Polrmt
chr10	79630234	79631188	Promoter (<=1kb)	Cirbp
chr10	79635631	79636203	Promoter (<=1kb)	1600002K03Rik
chr10	79723497	79724772	Promoter (<=1kb)	Gamt
chr10	80065340	80066107	Promoter (<=1kb)	Adat3
chr10	80828456	80829400	Promoter (<=1kb)	4930404N11Rik
chr10	81067880	81069489	Promoter (<=1kb)	BC025920
chr10	81111504	81112250	Promoter (<=1kb)	Gm10778
chr10	81510517	81511425	Promoter (<=1kb)	Zfp873
chr10	81590443	81591212	Promoter (<=1kb)	AU041133
chr10	81703506	81704340	Promoter (<=1kb)	Zfp938
chr10	82085438	82086431	Promoter (<=1kb)	1190007I07Rik
chr10	82161454	82162751	Promoter (<=1kb)	Hcfc2
chr10	84038752	84040380	Promoter (<=1kb)	Tcp11l2
chr10	84379592	84380588	Promoter (<=1kb)	Ric8b
chr10	85484301	85485327	Promoter (<=1kb)	Fbxo7
chr10	85960904	85962051	Promoter (<=1kb)	Syn3
chr10	86147742	86148882	Promoter (<=1kb)	1810014B01Rik
chr10	89194137	89195401	Promoter (<=1kb)	Actr6
chr10	92951082	92951948	Promoter (<=1kb)	Hal
chr10	93002451	93003068	Promoter (<=1kb)	Amdhd1
chr10	94786023	94787028	Promoter (<=1kb)	Cradd
chr10	110735332	110736149	Promoter (<=1kb)	Bbs10
chr10	119549521	119550370	Promoter (<=1kb)	Helb
chr10	120746252	120748331	Promoter (<=1kb)	Tbc1d30
chr10	122115615	122116547	Promoter (<=1kb)	Ppm1h
chr10	126337752	126338874	Promoter (<=1kb)	Xrcc6bp1
chr10	127648068	127650295	Promoter (<=1kb)	Spryd4
chr10	128327841	128329118	Promoter (<=1kb)	Gdf11
chr11	3794837	3795553	Promoter (<=1kb)	4921536K21Rik
chr11	6504309	6506123	Promoter (<=1kb)	Nacad
chr11	9017605	9018776	Promoter (<=1kb)	Upp1
chr11	16850879	16851785	Promoter (<=1kb)	Fbxo48
chr11	18918735	18920734	Promoter (<=1kb)	Meis1
chr11	22412197	22412973	Promoter (<=1kb)	Tmem17
chr11	22907463	22908665	Promoter (<=1kb)	Fam161a
chr11	23670514	23671654	Promoter (<=1kb)	Rel
chr11	26286893	26287729	Promoter (<=1kb)	Fancl
chr11	26493122	26494148	Promoter (<=1kb)	Vrk2
chr11	29425974	29426676	Promoter (<=1kb)	Mtif2
chr11	30548952	30549676	Promoter (<=1kb)	Acyp2
chr11	32186261	32187236	Promoter (<=1kb)	Hbq1b
chr11	33047222	33048805	Promoter (<=1kb)	Fgf18
chr11	33412768	33413768	Promoter (<=1kb)	Ranbp17
chr11	46268026	46268541	Promoter (<=1kb)	Havcr2
chr11	48639542	48640521	Promoter (<=1kb)	Trim7
chr11	48650756	48652204	Promoter (<=1kb)	Trim7
chr11	49987759	49988637	Promoter (<=1kb)	3010026O09Rik
chr11	50640717	50641519	Promoter (<=1kb)	Zfp354c
chr11	50700822	50701346	Promoter (<=1kb)	Zfp454
chr11	50744725	50746137	Promoter (<=1kb)	Zfp354b
chr11	50872597	50873272	Promoter (<=1kb)	Zfp354a
chr11	51817480	51818026	Promoter (<=1kb)	Cdkl3
chr11	53137988	53138398	Promoter (<=1kb)	Zcchc10
chr11	53270005	53271464	Promoter (<=1kb)	Shroom1
chr11	53793209	53794054	Promoter (<=1kb)	Slc22a21
chr11	54062605	54063428	Promoter (<=1kb)	Csf2
chr11	58012822	58013417	Promoter (<=1kb)	Igtp
chr11	58028230	58028670	Promoter (<=1kb)	Irgm2
chr11	58717077	58718605	Promoter (<=1kb)	Zfp39
chr11	58761817	58762845	Promoter (<=1kb)	Hist3h2ba
chr11	58767414	58768846	Promoter (<=1kb)	Hist3h2a
chr11	58790644	58792351	Promoter (<=1kb)	Trim11
chr11	59004675	59005757	Promoter (<=1kb)	Guk1
chr11	59015496	59016354	Promoter (<=1kb)	Mrpl55
chr11	59120076	59122011	Promoter (<=1kb)	Wnt9a
chr11	59285135	59286260	Promoter (<=1kb)	Zfp867
chr11	61743332	61744209	Promoter (<=1kb)	Akap10
chr11	62388767	62389556	Promoter (<=1kb)	Trpv2
chr11	62544945	62546430	Promoter (<=1kb)	Zfp287
chr11	62602721	62603143	Promoter (<=1kb)	Zfp286
chr11	63892571	63893615	Promoter (<=1kb)	2810001G20Rik
chr11	65619894	65621142	Promoter (<=1kb)	Zkscan6
chr11	66838301	66838925	Promoter (<=1kb)	Tmem220
chr11	67778913	67780211	Promoter (<=1kb)	Stx8
chr11	69208761	69210025	Promoter (<=1kb)	Cyb5d1
chr11	69616206	69617792	Promoter (<=1kb)	G630025P09Rik
chr11	70513436	70514431	Promoter (<=1kb)	Inca1
chr11	70577510	70578309	Promoter (<=1kb)	Zfp3
chr11	72224418	72225650	Promoter (<=1kb)	Smtnl2
chr11	72608876	72610235	Promoter (<=1kb)	Cyb5d2
chr11	72832009	72833248	Promoter (<=1kb)	Camkk1
chr11	73012331	73013237	Promoter (<=1kb)	Shpk
chr11	74738969	74740376	Promoter (<=1kb)	Smg6
chr11	74983709	74984357	Promoter (<=1kb)	Hic1
chr11	75322556	75324581	Promoter (<=1kb)	Rilp
chr11	75992251	75993421	Promoter (<=1kb)	Fam57a
chr11	76015211	76016170	Promoter (<=1kb)	Fam57a
chr11	76891537	76892311	Promoter (<=1kb)	Ccdc55
chr11	77328368	77329351	Promoter (<=1kb)	Abhd15
chr11	77989727	77992842	Promoter (<=1kb)	Nek8
chr11	78310866	78311616	Promoter (<=1kb)	Sarm1
chr11	79967291	79967965	Promoter (<=1kb)	Adap2
chr11	79996851	79997637	Promoter (<=1kb)	Rnf135
chr11	80289928	80290948	Promoter (<=1kb)	Cdk5r1
chr11	83112132	83112754	Promoter (<=1kb)	Pex12
chr11	83222506	83223529	Promoter (<=1kb)	Rasl10b
chr11	84631550	84633340	Promoter (<=1kb)	Mrm1
chr11	84642232	84642921	Promoter (<=1kb)	Dhrs11
chr11	88834973	88835974	Promoter (<=1kb)	Coil
chr11	94409778	94410857	Promoter (<=1kb)	Rsad1
chr11	94537853	94539115	Promoter (<=1kb)	Xylt2
chr11	95375503	95376250	Promoter (<=1kb)	Nxph3
chr11	95994155	95995172	Promoter (<=1kb)	Ttll6
chr11	96804924	96805674	Promoter (<=1kb)	Pnpo
chr11	97745000	97746026	Promoter (<=1kb)	Fbxo47
chr11	98261381	98262516	Promoter (<=1kb)	Pgap3
chr11	98697256	98698496	Promoter (<=1kb)	Rapgefl1
chr11	99442113	99443297	Promoter (<=1kb)	Krtap1-5
chr11	100406630	100407211	Promoter (<=1kb)	Ttc25
chr11	101526599	101527251	Promoter (<=1kb)	Arl4d
chr11	102993561	102994710	Promoter (<=1kb)	Hexim2
chr11	104987093	104988078	Promoter (<=1kb)	Mettl2
chr11	105927085	105927899	Promoter (<=1kb)	Taco1
chr11	106137753	106138023	Promoter (<=1kb)	Tcam1
chr11	106640407	106641387	Promoter (<=1kb)	Polg2
chr11	106888950	106889898	Promoter (<=1kb)	1810010H24Rik
chr11	109471540	109473494	Promoter (<=1kb)	Wipi1
chr11	109856401	109857359	Promoter (<=1kb)	Abca8b
chr11	113033753	113034514	Promoter (<=1kb)	2610035D17Rik
chr11	113062292	113063377	Promoter (<=1kb)	2610035D17Rik
chr11	113544507	113546153	Promoter (<=1kb)	D11Wsu47e
chr11	113569916	113570281	Promoter (<=1kb)	Cpsf4l
chr11	114588570	114588963	Promoter (<=1kb)	Dnaic2
chr11	114598217	114598613	Promoter (<=1kb)	Dnaic2
chr11	115014962	115015589	Promoter (<=1kb)	Rab37
chr11	115048387	115049081	Promoter (<=1kb)	Tmem104
chr11	115138041	115138903	Promoter (<=1kb)	Fdxr
chr11	115158565	115159191	Promoter (<=1kb)	Fads6
chr11	115336658	115337367	Promoter (<=1kb)	Armc7
chr11	115489012	115489825	Promoter (<=1kb)	Slc25a19
chr11	116196533	116197404	Promoter (<=1kb)	Foxj1
chr11	116532317	116533149	Promoter (<=1kb)	1810032O08Rik
chr11	117734556	117734978	Promoter (<=1kb)	Tha1
chr11	118073189	118074431	Promoter (<=1kb)	Cyth1
chr11	118108842	118110631	Promoter (<=1kb)	Cyth1
chr11	118304541	118304910	Promoter (<=1kb)	C1qtnf1
chr11	118337946	118338605	Promoter (<=1kb)	Engase
chr11	118901946	118903051	Promoter (<=1kb)	Cbx8
chr11	119947555	119948497	Promoter (<=1kb)	Azi1
chr11	119959788	119960701	Promoter (<=1kb)	1810043H04Rik
chr11	120050671	120051689	Promoter (<=1kb)	2810410L24Rik
chr11	120469306	120470047	Promoter (<=1kb)	Npb
chr11	120588247	120588910	Promoter (<=1kb)	Dcxr
chr11	120793800	120794448	Promoter (<=1kb)	Ccdc57
chr12	4038586	4039054	Promoter (<=1kb)	Efr3b
chr12	4082501	4083127	Promoter (<=1kb)	Dnajc27
chr12	4483207	4484546	Promoter (<=1kb)	Ncoa1
chr12	4848111	4848693	Promoter (<=1kb)	Fkbp1b
chr12	4849873	4850429	Promoter (<=1kb)	BC068281
chr12	4880915	4881572	Promoter (<=1kb)	Mfsd2b
chr12	8954444	8955158	Promoter (<=1kb)	Matn3
chr12	8980578	8981045	Promoter (<=1kb)	Wdr35
chr12	12947945	12949669	Promoter (<=1kb)	Mycn
chr12	21291420	21292474	Promoter (<=1kb)	Itgb1bp1
chr12	25183194	25184067	Promoter (<=1kb)	Taf1b
chr12	25256693	25257547	Promoter (<=1kb)	Grhl1
chr12	29334150	29334866	Promoter (<=1kb)	Rnaseh1
chr12	37107961	37108980	Promoter (<=1kb)	Ispd
chr12	39505267	39507018	Promoter (<=1kb)	Etv1
chr12	53198463	53198986	Promoter (<=1kb)	Nubpl
chr12	55796371	55799211	Promoter (<=1kb)	Eapp
chr12	58259972	58262105	Promoter (<=1kb)	Slc25a21
chr12	66018519	66019468	Promoter (<=1kb)	Gm527
chr12	72237191	72238417	Promoter (<=1kb)	Timm9
chr12	74224523	74225109	Promoter (<=1kb)	Mnat1
chr12	74387462	74388308	Promoter (<=1kb)	Slc38a6
chr12	76408829	76409855	Promoter (<=1kb)	Rhoj
chr12	77938139	77939022	Promoter (<=1kb)	Fntb
chr12	80190179	80190887	Promoter (<=1kb)	Pigh
chr12	81233356	81234309	Promoter (<=1kb)	2310015A10Rik
chr12	82585662	82586283	Promoter (<=1kb)	Cox16
chr12	82695795	82696706	Promoter (<=1kb)	Med6
chr12	85702488	85703368	Promoter (<=1kb)	Fam161b
chr12	85758050	85758473	Promoter (<=1kb)	Rnf113a2
chr12	88066750	88067629	Promoter (<=1kb)	Angel1
chr12	88783751	88785084	Promoter (<=1kb)	Alkbh1
chr12	99866092	99866982	Promoter (<=1kb)	Spata7
chr12	102137284	102137859	Promoter (<=1kb)	Gpr68
chr12	110073654	110074685	Promoter (<=1kb)	Slc25a29
chr12	110132097	110132715	Promoter (<=1kb)	Wdr25
chr12	113182329	113183086	Promoter (<=1kb)	5033406O09Rik
chr12	113916727	113917565	Promoter (<=1kb)	Zbtb42
chr12	114046800	114047635	Promoter (<=1kb)	BC022687
chr12	114179851	114180617	Promoter (<=1kb)	Nudt14
chr12	120085141	120086093	Promoter (<=1kb)	Sp8
chr12	120476360	120477497	Promoter (<=1kb)	Itgb8
chr13	12552671	12554378	Promoter (<=1kb)	Lgals8
chr13	21454432	21454998	Promoter (<=1kb)	Zscan12
chr13	21532425	21533155	Promoter (<=1kb)	Pgbd1
chr13	21560002	21560742	Promoter (<=1kb)	Nkapl
chr13	22036607	22037555	Promoter (<=1kb)	Zfp184
chr13	22132671	22133365	Promoter (<=1kb)	Hist1h4i
chr13	22134454	22135631	Promoter (<=1kb)	Hist1h2ag
chr13	23646779	23648404	Promoter (<=1kb)	Hist1h1d
chr13	23662653	23663783	Promoter (<=1kb)	Hist1h2ae
chr13	23665705	23666736	Promoter (<=1kb)	Hist1h3d
chr13	23712746	23714572	Promoter (<=1kb)	Hist1h2be
chr13	23775444	23776665	Promoter (<=1kb)	Hist1h2ac
chr13	23837058	23839127	Promoter (<=1kb)	Hist1h3c
chr13	23842902	23844604	Promoter (<=1kb)	Hist1h3b
chr13	25111745	25112634	Promoter (<=1kb)	Mrs2
chr13	35997656	35998481	Promoter (<=1kb)	Rpp40
chr13	36208593	36209921	Promoter (<=1kb)	Lyrm4
chr13	38128640	38129442	Promoter (<=1kb)	Cage1
chr13	38295699	38297217	Promoter (<=1kb)	Snrnp48
chr13	39052027	39052930	Promoter (<=1kb)	Slc35b3
chr13	42395982	42397183	Promoter (<=1kb)	Edn1
chr13	43266511	43269053	Promoter (<=1kb)	Tbc1d7
chr13	43460507	43461297	Promoter (<=1kb)	Sirt5
chr13	45602576	45604231	Promoter (<=1kb)	Gmpr
chr13	46764439	46766220	Promoter (<=1kb)	C78339
chr13	48720428	48721342	Promoter (<=1kb)	Ptpdc1
chr13	50512917	50514012	Promoter (<=1kb)	Fbxw17
chr13	51746655	51747523	Promoter (<=1kb)	Secisbp2
chr13	54676160	54677043	Promoter (<=1kb)	Arl10
chr13	55565471	55567043	Promoter (<=1kb)	Prr7
chr13	56623366	56624228	Promoter (<=1kb)	Fbxl21
chr13	62484293	62485018	Promoter (<=1kb)	Gm3604
chr13	62567812	62568685	Promoter (<=1kb)	Zfp935
chr13	62659582	62660494	Promoter (<=1kb)	Zfp935
chr13	62725191	62725858	Promoter (<=1kb)	6720489N17Rik
chr13	62959623	62960231	Promoter (<=1kb)	Fbp2
chr13	63532015	63533353	Promoter (<=1kb)	Fancc
chr13	67005621	67006550	Promoter (<=1kb)	Gm10767
chr13	67161061	67162270	Promoter (<=1kb)	Zfp712
chr13	67181966	67183218	Promoter (<=1kb)	Zfp708
chr13	67208965	67210095	Promoter (<=1kb)	Zfp708
chr13	67228837	67229829	Promoter (<=1kb)	Zfp759
chr13	67273826	67274697	Promoter (<=1kb)	Rsl1
chr13	67295160	67295888	Promoter (<=1kb)	Zfp455
chr13	67369827	67370970	Promoter (<=1kb)	Zfp458
chr13	67406817	67407896	Promoter (<=1kb)	Zfp457
chr13	67433012	67433880	Promoter (<=1kb)	Zfp595
chr13	67460887	67461809	Promoter (<=1kb)	Zfp595
chr13	67476201	67477557	Promoter (<=1kb)	Zfp456
chr13	67500270	67500961	Promoter (<=1kb)	Zfp429
chr13	67551998	67552856	Promoter (<=1kb)	Zfp874a
chr13	67584727	67585450	Promoter (<=1kb)	Zfp874b
chr13	67600996	67601730	Promoter (<=1kb)	Zfp58
chr13	67626692	67627415	Promoter (<=1kb)	Zfp87
chr13	67653569	67654331	Promoter (<=1kb)	Zfp748
chr13	67738067	67738974	Promoter (<=1kb)	A530054K11Rik
chr13	67880379	67881282	Promoter (<=1kb)	Zfp493
chr13	67914526	67915509	Promoter (<=1kb)	Zfp273
chr13	74146503	74147305	Promoter (<=1kb)	Tppp
chr13	74199320	74200047	Promoter (<=1kb)	Cep72
chr13	74500881	74501654	Promoter (<=1kb)	Lrrc14b
chr13	76154961	76156462	Promoter (<=1kb)	Rfesd
chr13	76718718	76719027	Promoter (<=1kb)	Mctp1
chr13	81771909	81772533	Promoter (<=1kb)	Gpr98
chr13	81796198	81797225	Promoter (<=1kb)	Lysmd3
chr13	93253284	93254243	Promoter (<=1kb)	Fam151b
chr13	97240420	97241252	Promoter (<=1kb)	Ankdd1b
chr13	101386663	101387021	Promoter (<=1kb)	Marveld2
chr13	107811740	107813293	Promoter (<=1kb)	3830408C21Rik
chr13	108948207	108949337	Promoter (<=1kb)	Ercc8
chr14	9091206	9091729	Promoter (<=1kb)	Acox2
chr14	11285513	11286138	Promoter (<=1kb)	Fhit
chr14	21113632	21114067	Promoter (<=1kb)	Nudt13
chr14	22666914	22668372	Promoter (<=1kb)	Comtd1
chr14	28435309	28435919	Promoter (<=1kb)	Erc2
chr14	30791475	30792186	Promoter (<=1kb)	Actr8
chr14	32030752	32031223	Promoter (<=1kb)	Sema3g
chr14	47451519	47452331	Promoter (<=1kb)	Cgrrf1
chr14	47808539	47809402	Promoter (<=1kb)	Gch1
chr14	48092015	48092988	Promoter (<=1kb)	Fbxo34
chr14	52503188	52504828	Promoter (<=1kb)	Mettl17
chr14	52738349	52739199	Promoter (<=1kb)	Rpgrip1
chr14	55094685	55095219	Promoter (<=1kb)	Rem2
chr14	55224726	55225070	Promoter (<=1kb)	4931414P19Rik
chr14	55259945	55260812	Promoter (<=1kb)	Cdh24
chr14	55482376	55483808	Promoter (<=1kb)	Homez
chr14	56109704	56110638	Promoter (<=1kb)	Lrrc16b
chr14	56377063	56377786	Promoter (<=1kb)	Cideb
chr14	56739375	56739976	Promoter (<=1kb)	Gzme
chr14	57190381	57191009	Promoter (<=1kb)	Cenpj
chr14	58016997	58017914	Promoter (<=1kb)	Cryl1
chr14	58042631	58043383	Promoter (<=1kb)	Ift88
chr14	58143588	58144931	Promoter (<=1kb)	Il17d
chr14	60059336	60060108	Promoter (<=1kb)	Setdb2
chr14	61790384	61792443	Promoter (<=1kb)	Sacs
chr14	62218174	62218606	Promoter (<=1kb)	Trim13
chr14	62266846	62268243	Promoter (<=1kb)	Dleu2
chr14	62299599	62301860	Promoter (<=1kb)	Dleu2
chr14	63455894	63457043	Promoter (<=1kb)	Wdfy2
chr14	65058998	65059950	Promoter (<=1kb)	Msra
chr14	66758547	66759852	Promoter (<=1kb)	Chrna2
chr14	70688688	70689556	Promoter (<=1kb)	Ppp3cc
chr14	70977223	70978488	Promoter (<=1kb)	Nudt18
chr14	70999152	70999964	Promoter (<=1kb)	Fam160b2
chr14	76955892	76956872	Promoter (<=1kb)	Serp2
chr14	77436032	77436889	Promoter (<=1kb)	Ccdc122
chr14	79797344	79798015	Promoter (<=1kb)	Mtrf1
chr14	84842992	84843520	Promoter (<=1kb)	Pcdh17
chr14	99498528	99499526	Promoter (<=1kb)	Pibf1
chr14	118635664	118636619	Promoter (<=1kb)	Sox21
chr14	122505998	122506920	Promoter (<=1kb)	A330035P11Rik
chr14	122580522	122581251	Promoter (<=1kb)	Clybl
chr14	122863175	122864914	Promoter (<=1kb)	Zic5
chr14	122933151	122933965	Promoter (<=1kb)	Pcca
chr15	10415435	10417498	Promoter (<=1kb)	Rad1
chr15	12134385	12135421	Promoter (<=1kb)	Mtmr12
chr15	12669406	12670007	Promoter (<=1kb)	Pdzd2
chr15	31382947	31383723	Promoter (<=1kb)	Ropn1l
chr15	35225480	35226247	Promoter (<=1kb)	Osr2
chr15	36103288	36104007	Promoter (<=1kb)	Polr2k
chr15	36108900	36109713	Promoter (<=1kb)	Spag1
chr15	37247502	37248279	Promoter (<=1kb)	Grhl2
chr15	38908461	38910341	Promoter (<=1kb)	Cthrc1
chr15	43701124	43701824	Promoter (<=1kb)	Tmem74
chr15	60654441	60656797	Promoter (<=1kb)	9930014A18Rik
chr15	66392139	66392887	Promoter (<=1kb)	Tmem71
chr15	74538609	74540150	Promoter (<=1kb)	Jrk
chr15	75446623	75447382	Promoter (<=1kb)	Zfp41
chr15	75533849	75535071	Promoter (<=1kb)	Rhpn1
chr15	75671967	75672708	Promoter (<=1kb)	Zc3h3
chr15	75724597	75725312	Promoter (<=1kb)	Naprt1
chr15	75799309	75800056	Promoter (<=1kb)	Zfp707
chr15	75823998	75824297	Promoter (<=1kb)	Mapk15
chr15	76540647	76541313	Promoter (<=1kb)	Lrrc14
chr15	76730003	76731305	Promoter (<=1kb)	Commd5
chr15	76778630	76779529	Promoter (<=1kb)	1110038F14Rik
chr15	81229828	81230772	Promoter (<=1kb)	Xpnpep3
chr15	81957820	81958668	Promoter (<=1kb)	Ccdc134
chr15	83997244	83999430	Promoter (<=1kb)	Pnpla3
chr15	84685689	84687036	Promoter (<=1kb)	Phf21b
chr15	85709193	85710186	Promoter (<=1kb)	Trmu
chr15	88649443	88650294	Promoter (<=1kb)	Alg12
chr15	91021936	91022894	Promoter (<=1kb)	Abcd2
chr15	97997895	97998637	Promoter (<=1kb)	AI836003
chr15	98397692	98398612	Promoter (<=1kb)	9330020H09Rik
chr15	98711263	98712183	Promoter (<=1kb)	Rhebl1
chr15	99304449	99305339	Promoter (<=1kb)	Bcdin3d
chr15	100325061	100326030	Promoter (<=1kb)	Csrnp2
chr15	100429248	100430796	Promoter (<=1kb)	Pou6f1
chr15	100591944	100592758	Promoter (<=1kb)	Slc4a8
chr15	102993554	102994089	Promoter (<=1kb)	Smug1
chr15	103344533	103346266	Promoter (<=1kb)	Pde1b
chr16	3846876	3847493	Promoter (<=1kb)	Zfp174
chr16	3872122	3872895	Promoter (<=1kb)	Zfp597
chr16	3908411	3909280	Promoter (<=1kb)	1700037C18Rik
chr16	4624351	4625235	Promoter (<=1kb)	Pam16
chr16	4639691	4640815	Promoter (<=1kb)	Vasn
chr16	4938692	4939830	Promoter (<=1kb)	Gm16861
chr16	4964026	4964799	Promoter (<=1kb)	Anks3
chr16	5013283	5013995	Promoter (<=1kb)	Rogdi
chr16	8470400	8471688	Promoter (<=1kb)	Mettl22
chr16	10542733	10543483	Promoter (<=1kb)	Dexi
chr16	10545156	10545643	Promoter (<=1kb)	Clec16a
chr16	10784985	10786785	Promoter (<=1kb)	Socs1
chr16	11908966	11909735	Promoter (<=1kb)	Cpped1
chr16	13671734	13673029	Promoter (<=1kb)	3110001I22Rik
chr16	15862432	15863690	Promoter (<=1kb)	Mzt2
chr16	16870530	16871403	Promoter (<=1kb)	Top3b
chr16	17069319	17070480	Promoter (<=1kb)	Ypel1
chr16	17146829	17147450	Promoter (<=1kb)	Ydjc
chr16	17233337	17234834	Promoter (<=1kb)	Hic2
chr16	17276186	17277164	Promoter (<=1kb)	Tmem191c
chr16	17646270	17646907	Promoter (<=1kb)	Ccdc74a
chr16	17911205	17911679	Promoter (<=1kb)	Dgcr14
chr16	18498434	18499148	Promoter (<=1kb)	Gnb1l
chr16	18836427	18837319	Promoter (<=1kb)	2510002D24Rik
chr16	20610705	20612121	Promoter (<=1kb)	Ece2
chr16	20716044	20718141	Promoter (<=1kb)	Clcn2
chr16	20732940	20733943	Promoter (<=1kb)	Chrd
chr16	21204349	21205329	Promoter (<=1kb)	Ephb3
chr16	21946922	21947854	Promoter (<=1kb)	Tmem41a
chr16	22920025	22920581	Promoter (<=1kb)	Fetub
chr16	26581509	26581998	Promoter (<=1kb)	Il1rap
chr16	30008519	30010055	Promoter (<=1kb)	4632428C04Rik
chr16	30283144	30284542	Promoter (<=1kb)	Lrrc15
chr16	32419573	32420416	Promoter (<=1kb)	Tctex1d2
chr16	32867928	32868723	Promoter (<=1kb)	1700021K19Rik
chr16	32877379	32878095	Promoter (<=1kb)	1700021K19Rik
chr16	33684375	33685652	Promoter (<=1kb)	Heg1
chr16	35363305	35364320	Promoter (<=1kb)	Sec22a
chr16	36040890	36041586	Promoter (<=1kb)	Wdr5b
chr16	36827875	36828837	Promoter (<=1kb)	Eaf2
chr16	36874764	36875865	Promoter (<=1kb)	Eaf2
chr16	37539554	37540479	Promoter (<=1kb)	Rabl3
chr16	38088218	38089817	Promoter (<=1kb)	BC031361
chr16	44016343	44016719	Promoter (<=1kb)	Gramd1c
chr16	45742633	45744061	Promoter (<=1kb)	Abhd10
chr16	50732536	50733164	Promoter (<=1kb)	5330426P16Rik
chr16	62786314	62787117	Promoter (<=1kb)	Nsun3
chr16	81200553	81201220	Promoter (<=1kb)	Ncam2
chr16	87354080	87354981	Promoter (<=1kb)	N6amt1
chr16	87440139	87441705	Promoter (<=1kb)	Rwdd2b
chr16	87698904	87700552	Promoter (<=1kb)	Bach1
chr16	91619026	91619519	Promoter (<=1kb)	Dnajc28
chr16	93682744	93683680	Promoter (<=1kb)	Cbr3
chr16	98072696	98073865	Promoter (<=1kb)	Prdm15
chr16	98143480	98144583	Promoter (<=1kb)	C2cd2
chr17	3557235	3558194	Promoter (<=1kb)	Tfb1m
chr17	6600357	6601680	Promoter (<=1kb)	Dynlt1f
chr17	6654847	6655370	Promoter (<=1kb)	Dynlt1f
chr17	6806068	6806709	Promoter (<=1kb)	Dynlt1f
chr17	8564665	8565964	Promoter (<=1kb)	T2
chr17	11032827	11034133	Promoter (<=1kb)	Park2
chr17	13132149	13134006	Promoter (<=1kb)	Acat3
chr17	15700877	15701872	Promoter (<=1kb)	Prdm9
chr17	17539501	17539870	Promoter (<=1kb)	Lix1
chr17	21145570	21146375	Promoter (<=1kb)	Zfp160
chr17	21786918	21788008	Promoter (<=1kb)	3110052M02Rik
chr17	22302317	22303361	Promoter (<=1kb)	Zfp947
chr17	22497812	22498734	Promoter (<=1kb)	Zfp758
chr17	22954305	22955020	Promoter (<=1kb)	Gm16386
chr17	23735627	23736672	Promoter (<=1kb)	Zfp13
chr17	23922403	23923367	Promoter (<=1kb)	Flywch2
chr17	24357410	24358291	Promoter (<=1kb)	1600002H07Rik
chr17	24606742	24607784	Promoter (<=1kb)	Pgp
chr17	25031874	25033660	Promoter (<=1kb)	Eme2
chr17	26917915	26919040	Promoter (<=1kb)	Bnip1
chr17	27109753	27110430	Promoter (<=1kb)	Zbtb9
chr17	30024323	30026395	Promoter (<=1kb)	Mdga1
chr17	31433011	31433831	Promoter (<=1kb)	Slc37a1
chr17	33102420	33103225	Promoter (<=1kb)	Zfp472
chr17	33129848	33130392	Promoter (<=1kb)	Zfp952
chr17	33169818	33170676	Promoter (<=1kb)	Zfp763
chr17	33426183	33426926	Promoter (<=1kb)	Zfp955b
chr17	33495242	33496143	Promoter (<=1kb)	Zfp81
chr17	33531153	33531957	Promoter (<=1kb)	Zfp101
chr17	34077144	34077796	Promoter (<=1kb)	H2-Ke2
chr17	34087893	34088955	Promoter (<=1kb)	B3galt4
chr17	34115585	34116081	Promoter (<=1kb)	H2-K2
chr17	34117900	34118566	Promoter (<=1kb)	AA388235
chr17	34161213	34162093	Promoter (<=1kb)	Ring1
chr17	34271311	34272735	Promoter (<=1kb)	H2-DMa
chr17	34701010	34701977	Promoter (<=1kb)	Notch4
chr17	34781532	34781909	Promoter (<=1kb)	Fkbpl
chr17	35183341	35184048	Promoter (<=1kb)	Msh5
chr17	35786472	35787732	Promoter (<=1kb)	Sfta2
chr17	36130577	36131542	Promoter (<=1kb)	A930015D03Rik
chr17	36258188	36258706	Promoter (<=1kb)	H2-T10
chr17	37003733	37004462	Promoter (<=1kb)	Trim15
chr17	37406873	37408170	Promoter (<=1kb)	H2-M3
chr17	46280893	46281411	Promoter (<=1kb)	Rsph9
chr17	46662562	46662960	Promoter (<=1kb)	Cul9
chr17	56017664	56018681	Promoter (<=1kb)	Zfp119a
chr17	56031132	56032076	Promoter (<=1kb)	Zfp959
chr17	56084150	56085080	Promoter (<=1kb)	Zfp119a
chr17	56098317	56099215	Promoter (<=1kb)	Ccdc94
chr17	56144860	56145136	Promoter (<=1kb)	Stap2
chr17	56464897	56465719	Promoter (<=1kb)	Kdm4b
chr17	56855941	56857361	Promoter (<=1kb)	Vmac
chr17	56896294	56897958	Promoter (<=1kb)	Nrtn
chr17	57244651	57245599	Promoter (<=1kb)	Gm11110
chr17	70318465	70319045	Promoter (<=1kb)	Dlgap1
chr17	71947575	71948865	Promoter (<=1kb)	Trmt61b
chr17	74857482	74858685	Promoter (<=1kb)	Nlrc4
chr17	79753842	79755280	Promoter (<=1kb)	Cdc42ep3
chr17	81463675	81464726	Promoter (<=1kb)	Thumpd2
chr17	87424162	87425179	Promoter (<=1kb)	Pigf
chr18	3280589	3281921	Promoter (<=1kb)	Crem
chr18	3336759	3338038	Promoter (<=1kb)	Crem
chr18	3507377	3508260	Promoter (<=1kb)	Bambi
chr18	4352749	4353670	Promoter (<=1kb)	Map3k8
chr18	9211907	9213804	Promoter (<=1kb)	Fzd8
chr18	10706322	10707214	Promoter (<=1kb)	Abhd3
chr18	12801684	12802655	Promoter (<=1kb)	Ttc39c
chr18	14130860	14131597	Promoter (<=1kb)	Zfp521
chr18	15221541	15223491	Promoter (<=1kb)	Kctd1
chr18	23199619	23200547	Promoter (<=1kb)	Nol4
chr18	24811888	24812680	Promoter (<=1kb)	Mocos
chr18	32297734	32299561	Promoter (<=1kb)	Proc
chr18	34568809	34569293	Promoter (<=1kb)	Pkd2l2
chr18	35821433	35822122	Promoter (<=1kb)	Spata24
chr18	36355644	36357357	Promoter (<=1kb)	Nrg2
chr18	37803586	37804206	Promoter (<=1kb)	Taf7
chr18	37974363	37975185	Promoter (<=1kb)	Pcdhgc4
chr18	39152408	39153331	Promoter (<=1kb)	Arhgap26
chr18	42110460	42111343	Promoter (<=1kb)	Prelid2
chr18	42434601	42435490	Promoter (<=1kb)	Gm4013
chr18	46357613	46359102	Promoter (<=1kb)	Trim36
chr18	49914752	49915835	Promoter (<=1kb)	Dtwd2
chr18	56559672	56560374	Promoter (<=1kb)	Gramd3
chr18	56590998	56592081	Promoter (<=1kb)	Gramd3
chr18	57710850	57712663	Promoter (<=1kb)	4930511M06Rik
chr18	62071100	62071661	Promoter (<=1kb)	Ablim3
chr18	70631372	70632601	Promoter (<=1kb)	Stard6
chr18	74223459	74225026	Promoter (<=1kb)	Mapk4
chr18	77285566	77286409	Promoter (<=1kb)	Katnal2
chr18	78033006	78035144	Promoter (<=1kb)	Pstpip2
chr18	80451967	80453675	Promoter (<=1kb)	Pqlc1
chr19	3282073	3283441	Promoter (<=1kb)	Ighmbp2
chr19	3929177	3929990	Promoter (<=1kb)	Aldh3b1
chr19	4175353	4176012	Promoter (<=1kb)	Carns1
chr19	4496611	4498901	Promoter (<=1kb)	2010003K11Rik
chr19	4942505	4943622	Promoter (<=1kb)	Peli3
chr19	8848687	8849659	Promoter (<=1kb)	Gm2518
chr19	8876519	8877232	Promoter (<=1kb)	Zbtb3
chr19	25684897	25685732	Promoter (<=1kb)	Dmrt3
chr19	29399555	29400142	Promoter (<=1kb)	Insl6
chr19	29441638	29442103	Promoter (<=1kb)	Cd274
chr19	33466005	33467017	Promoter (<=1kb)	Rnls
chr19	34364679	34365775	Promoter (<=1kb)	Fas
chr19	36628461	36629893	Promoter (<=1kb)	Hectd2
chr19	36992882	36994221	Promoter (<=1kb)	Fgfbp3
chr19	37281079	37282641	Promoter (<=1kb)	Cpeb3
chr19	39815386	39815767	Promoter (<=1kb)	Cyp2c68
chr19	41904045	41905688	Promoter (<=1kb)	Frat1
chr19	44619239	44620408	Promoter (<=1kb)	Sec31b
chr19	46402482	46404831	Promoter (<=1kb)	Fbxl15
chr19	46764244	46764839	Promoter (<=1kb)	2010012O05Rik
chr19	46781697	46782712	Promoter (<=1kb)	As3mt
chr19	47251421	47253518	Promoter (<=1kb)	Neurl1a
chr19	57082641	57083289	Promoter (<=1kb)	Afap1l2
chr2	3249576	3250524	Promoter (<=1kb)	Rpp38
chr2	3429403	3430567	Promoter (<=1kb)	Cdnf
chr2	4638484	4639633	Promoter (<=1kb)	Bend7
chr2	9800058	9801616	Promoter (<=1kb)	Gata3
chr2	12340256	12341364	Promoter (<=1kb)	Fam188a
chr2	17948329	17950721	Promoter (<=1kb)	Gm17762
chr2	24934450	24935960	Promoter (<=1kb)	Entpd8
chr2	25110700	25111386	Promoter (<=1kb)	Tmem203
chr2	25315931	25316821	Promoter (<=1kb)	BC029214
chr2	25476703	25477793	Promoter (<=1kb)	Tmem141
chr2	26092491	26093301	Promoter (<=1kb)	Qsox2
chr2	26883284	26883826	Promoter (<=1kb)	Slc2a6
chr2	27280737	27283903	Promoter (<=1kb)	Vav2
chr2	28908398	28910899	Promoter (<=1kb)	1700101E01Rik
chr2	29202082	29202580	Promoter (<=1kb)	Med27
chr2	30026796	30027578	Promoter (<=1kb)	Endog
chr2	30247543	30248952	Promoter (<=1kb)	Dolpp1
chr2	32236948	32237837	Promoter (<=1kb)	1110008P14Rik
chr2	33286439	33287341	Promoter (<=1kb)	Zbtb34
chr2	34813449	34814503	Promoter (<=1kb)	Traf1
chr2	39081221	39082187	Promoter (<=1kb)	Ppp6c
chr2	51827716	51829252	Promoter (<=1kb)	Nmi
chr2	58998479	59000162	Promoter (<=1kb)	Ccdc148
chr2	62483660	62484498	Promoter (<=1kb)	Ifih1
chr2	69484884	69485585	Promoter (<=1kb)	Bbs5
chr2	69723271	69724137	Promoter (<=1kb)	Mettl5
chr2	73224081	73225109	Promoter (<=1kb)	Gpr155
chr2	73418255	73419148	Promoter (<=1kb)	Chrna1
chr2	75776034	75776969	Promoter (<=1kb)	Ttc30b
chr2	75819541	75820270	Promoter (<=1kb)	Ttc30a1
chr2	80456923	80457804	Promoter (<=1kb)	Dusp19
chr2	84567280	84567991	Promoter (<=1kb)	Clp1
chr2	91076732	91078037	Promoter (<=1kb)	Ddb2
chr2	91550321	91551512	Promoter (<=1kb)	Harbi1
chr2	93689433	93690336	Promoter (<=1kb)	Accs
chr2	101468699	101469479	Promoter (<=1kb)	B230118H07Rik
chr2	101518254	101519130	Promoter (<=1kb)	Traf6
chr2	102291040	102292529	Promoter (<=1kb)	Fjx1
chr2	103405337	103406977	Promoter (<=1kb)	Abtb2
chr2	105744196	105745216	Promoter (<=1kb)	Immp1l
chr2	105843092	105843753	Promoter (<=1kb)	Dnajc24
chr2	115406888	115408008	Promoter (<=1kb)	BC052040
chr2	118860341	118861186	Promoter (<=1kb)	Rpusd2
chr2	119372583	119373714	Promoter (<=1kb)	Exd1
chr2	119567829	119568739	Promoter (<=1kb)	Itpka
chr2	121267633	121268684	Promoter (<=1kb)	Ell3
chr2	122293198	122293890	Promoter (<=1kb)	Bambi-ps1
chr2	122463297	122463802	Promoter (<=1kb)	AA467197
chr2	125548956	125550450	Promoter (<=1kb)	Shc4
chr2	127269848	127270542	Promoter (<=1kb)	Fahd2a
chr2	128769162	128770049	Promoter (<=1kb)	Zc3h8
chr2	128792680	128793988	Promoter (<=1kb)	Zc3h6
chr2	129625921	129627821	Promoter (<=1kb)	4932416H05Rik
chr2	130120707	130121683	Promoter (<=1kb)	Ebf4
chr2	130881351	130882356	Promoter (<=1kb)	Adam33
chr2	132512420	132513297	Promoter (<=1kb)	1110034G24Rik
chr2	136537876	136540242	Promoter (<=1kb)	Snap25
chr2	140220736	140221993	Promoter (<=1kb)	Macrod2
chr2	144284609	144285322	Promoter (<=1kb)	Zfp133-ps
chr2	145500314	145501880	Promoter (<=1kb)	BC039771
chr2	150007116	150007605	Promoter (<=1kb)	Gm14139
chr2	150188023	150188937	Promoter (<=1kb)	3300002I08Rik
chr2	150310567	150311237	Promoter (<=1kb)	Zfp345
chr2	151457778	151458447	Promoter (<=1kb)	Snph
chr2	153474922	153475976	Promoter (<=1kb)	Dnmt3b
chr2	154438774	154439947	Promoter (<=1kb)	Zfp341
chr2	155833431	155834259	Promoter (<=1kb)	6430550D23Rik
chr2	155878513	155879014	Promoter (<=1kb)	Fer1l4
chr2	155890815	155891830	Promoter (<=1kb)	Spag4
chr2	158450316	158451297	Promoter (<=1kb)	Actr5
chr2	160698119	160699248	Promoter (<=1kb)	Zhx3
chr2	160712957	160714272	Promoter (<=1kb)	Lpin3
chr2	163646379	163646687	Promoter (<=1kb)	Wisp2
chr2	163872931	163873428	Promoter (<=1kb)	Pabpc1l
chr2	164630141	164630991	Promoter (<=1kb)	Acot8
chr2	166618964	166619796	Promoter (<=1kb)	Trp53rk
chr2	167363225	167363843	Promoter (<=1kb)	Snai1
chr2	175100231	175101271	Promoter (<=1kb)	Gm14288
chr2	175197602	175198359	Promoter (<=1kb)	Gm14431
chr2	175702564	175703155	Promoter (<=1kb)	Gm8898
chr2	175799463	175800705	Promoter (<=1kb)	Gm14288
chr2	175929960	175930565	Promoter (<=1kb)	Gm8898
chr2	175964083	175965220	Promoter (<=1kb)	Gm14308
chr2	176193795	176195112	Promoter (<=1kb)	Gm14308
chr2	176329628	176330220	Promoter (<=1kb)	Gm14288
chr2	180459802	180460233	Promoter (<=1kb)	Slc17a9
chr2	181193601	181194787	Promoter (<=1kb)	Zbtb46
chr2	181332205	181334085	Promoter (<=1kb)	Samd10
chr2	181413485	181415885	Promoter (<=1kb)	Tcea2
chr3	7612609	7613611	Promoter (<=1kb)	Il7
chr3	8666736	8668051	Promoter (<=1kb)	Hey1
chr3	9704857	9705432	Promoter (<=1kb)	Pag1
chr3	10439384	10440467	Promoter (<=1kb)	Snx16
chr3	30754392	30755452	Promoter (<=1kb)	Gpr160
chr3	33742801	33743477	Promoter (<=1kb)	Ccdc39
chr3	37211138	37212782	Promoter (<=1kb)	Cetn4
chr3	37317933	37319466	Promoter (<=1kb)	Nudt6
chr3	40650330	40651301	Promoter (<=1kb)	Mfsd8
chr3	40697638	40698447	Promoter (<=1kb)	3110057O12Rik
chr3	41545404	41547728	Promoter (<=1kb)	Sclt1
chr3	51363533	51365770	Promoter (<=1kb)	5031434O11Rik
chr3	54559149	54560532	Promoter (<=1kb)	Smad9
chr3	55265558	55265930	Promoter (<=1kb)	Dclk1
chr3	63732828	63733600	Promoter (<=1kb)	E130311K13Rik
chr3	65469570	65470657	Promoter (<=1kb)	Lekr1
chr3	66784669	66786767	Promoter (<=1kb)	Shox2
chr3	81736318	81737173	Promoter (<=1kb)	Ctso
chr3	83645028	83645746	Promoter (<=1kb)	Tlr2
chr3	85690882	85692563	Promoter (<=1kb)	Glt28d2
chr3	86596952	86598173	Promoter (<=1kb)	Dclk2
chr3	87733839	87734739	Promoter (<=1kb)	Rrnad1
chr3	88893692	88895443	Promoter (<=1kb)	Rusc1
chr3	89141098	89142192	Promoter (<=1kb)	Efna4
chr3	89716134	89717361	Promoter (<=1kb)	Il6ra
chr3	90017324	90018014	Promoter (<=1kb)	Rps27
chr3	90024013	90024890	Promoter (<=1kb)	Rab13
chr3	90057822	90058819	Promoter (<=1kb)	Crtc2
chr3	94736783	94737229	Promoter (<=1kb)	Selenbp1
chr3	94964007	94964769	Promoter (<=1kb)	Sema6c
chr3	95861581	95862556	Promoter (<=1kb)	Vps45
chr3	96397700	96398398	Promoter (<=1kb)	Polr3gl
chr3	96433521	96434317	Promoter (<=1kb)	6330549D23Rik
chr3	96449208	96449545	Promoter (<=1kb)	Itga10
chr3	96473707	96474375	Promoter (<=1kb)	Ankrd35
chr3	96512036	96512745	Promoter (<=1kb)	Nudt17
chr3	97461594	97462696	Promoter (<=1kb)	Prkab2
chr3	100725760	100726614	Promoter (<=1kb)	Trim45
chr3	101727697	101728522	Promoter (<=1kb)	Slc22a15
chr3	103541739	103542536	Promoter (<=1kb)	Olfml3
chr3	104582895	104584583	Promoter (<=1kb)	Ppm1j
chr3	106285143	106286303	Promoter (<=1kb)	Dennd2d
chr3	107734534	107735047	Promoter (<=1kb)	Gstm7
chr3	107746546	107746958	Promoter (<=1kb)	Gstm6
chr3	108003147	108004030	Promoter (<=1kb)	Cyb561d1
chr3	108393909	108394924	Promoter (<=1kb)	Wdr47
chr3	113332453	113333852	Promoter (<=1kb)	Rnpc3
chr3	115417637	115418215	Promoter (<=1kb)	S1pr1
chr3	115590338	115591579	Promoter (<=1kb)	A930005H10Rik
chr3	116265639	116266311	Promoter (<=1kb)	Lrrc39
chr3	120874166	120874987	Promoter (<=1kb)	Rwdd3
chr3	120965409	120966290	Promoter (<=1kb)	Tmem56
chr3	120994302	120995311	Promoter (<=1kb)	Alg14
chr3	121235036	121235486	Promoter (<=1kb)	Slc44a3
chr3	123393005	123394193	Promoter (<=1kb)	Ndst3
chr3	129427874	129428571	Promoter (<=1kb)	Egf
chr3	134943868	134944417	Promoter (<=1kb)	Bdh2
chr3	135100745	135102510	Promoter (<=1kb)	4930539J05Rik
chr3	135488152	135489684	Promoter (<=1kb)	Slc39a8
chr3	137286302	137287193	Promoter (<=1kb)	Ddit4l
chr3	142282623	142284424	Promoter (<=1kb)	Gbp2
chr3	142363459	142364360	Promoter (<=1kb)	Ccbl2
chr3	145585202	145587902	Promoter (<=1kb)	Bcl10
chr4	6117849	6118641	Promoter (<=1kb)	Ubxn2b
chr4	9696957	9698697	Promoter (<=1kb)	4930412C18Rik
chr4	15940531	15941512	Promoter (<=1kb)	Osgin2
chr4	21806564	21807578	Promoter (<=1kb)	Coq3
chr4	32325223	32326921	Promoter (<=1kb)	Bach2
chr4	32886989	32887715	Promoter (<=1kb)	Lyrm2
chr4	33037481	33038031	Promoter (<=1kb)	Ankrd6
chr4	41411579	41412412	Promoter (<=1kb)	Kif24
chr4	41586936	41587677	Promoter (<=1kb)	Enho
chr4	41720335	41721368	Promoter (<=1kb)	Ccl27a
chr4	42962260	42963296	Promoter (<=1kb)	Dnajb5
chr4	43279844	43280345	Promoter (<=1kb)	Atp8b5
chr4	43669018	43669795	Promoter (<=1kb)	Hint2
chr4	43739765	43740232	Promoter (<=1kb)	Hrct1
chr4	46401843	46403713	Promoter (<=1kb)	5830415F09Rik
chr4	61947165	61947923	Promoter (<=1kb)	Slc31a2
chr4	62095309	62095963	Promoter (<=1kb)	Rnf183
chr4	62162893	62163670	Promoter (<=1kb)	Hdhd3
chr4	70195631	70197322	Promoter (<=1kb)	Megf9
chr4	83063203	83063891	Promoter (<=1kb)	Snapc3
chr4	91043021	91043565	Promoter (<=1kb)	Elavl2
chr4	93001296	93002637	Promoter (<=1kb)	Tusc1
chr4	99495560	99496390	Promoter (<=1kb)	Efcab7
chr4	99768285	99769088	Promoter (<=1kb)	Ror1
chr4	102242152	102243512	Promoter (<=1kb)	Pde4b
chr4	104782253	104782735	Promoter (<=1kb)	Prkaa2
chr4	106323371	106324125	Promoter (<=1kb)	Pars2
chr4	106739044	106740401	Promoter (<=1kb)	Cyb5rl
chr4	106986214	106987254	Promoter (<=1kb)	Yipf1
chr4	107562101	107563022	Promoter (<=1kb)	0610037L13Rik
chr4	107595917	107596526	Promoter (<=1kb)	Cpt2
chr4	109078672	109079995	Promoter (<=1kb)	Ttc39a
chr4	115500273	115501346	Promoter (<=1kb)	Mob3c
chr4	115690031	115691199	Promoter (<=1kb)	Faah
chr4	115725428	115726736	Promoter (<=1kb)	Nsun4
chr4	116269871	116270522	Promoter (<=1kb)	Ccdc17
chr4	116493516	116494495	Promoter (<=1kb)	Hpdl
chr4	118846383	118847124	Promoter (<=1kb)	Zfp691
chr4	118867699	118868420	Promoter (<=1kb)	Ccdc23
chr4	118905021	118906327	Promoter (<=1kb)	AU022252
chr4	119094497	119095729	Promoter (<=1kb)	Ppcs
chr4	119309905	119310413	Promoter (<=1kb)	Guca2a
chr4	120623881	120624878	Promoter (<=1kb)	Zfp69
chr4	120887055	120888037	Promoter (<=1kb)	Rlf
chr4	123019010	123020822	Promoter (<=1kb)	Bmp8a
chr4	123088638	123089975	Promoter (<=1kb)	D830031N03Rik
chr4	123395009	123395806	Promoter (<=1kb)	Ndufs5
chr4	124613910	124614533	Promoter (<=1kb)	9930104L06Rik
chr4	124799602	124800645	Promoter (<=1kb)	Zc3h12a
chr4	124804655	124805458	Promoter (<=1kb)	Zc3h12a
chr4	125734423	125736037	Promoter (<=1kb)	Oscp1
chr4	125998295	125999254	Promoter (<=1kb)	Adprhl2
chr4	126803086	126803537	Promoter (<=1kb)	Gm12942
chr4	126991051	126991602	Promoter (<=1kb)	Gja4
chr4	128287106	128287704	Promoter (<=1kb)	Zscan20
chr4	129233682	129234143	Promoter (<=1kb)	Lck
chr4	129373509	129374361	Promoter (<=1kb)	Tmem39b
chr4	129815685	129816020	Promoter (<=1kb)	Hcrtr1
chr4	132019499	132020150	Promoter (<=1kb)	Med18
chr4	132768051	132769890	Promoter (<=1kb)	Gpr3
chr4	133139977	133140624	Promoter (<=1kb)	Gpn2
chr4	133227286	133228942	Promoter (<=1kb)	Pigv
chr4	133637632	133638291	Promoter (<=1kb)	Aim1l
chr4	133658301	133658845	Promoter (<=1kb)	Ubxn11
chr4	133801239	133801823	Promoter (<=1kb)	Zfp593
chr4	134259445	134260724	Promoter (<=1kb)	Man1c1
chr4	135476317	135476875	Promoter (<=1kb)	Fuca1
chr4	135761921	135762639	Promoter (<=1kb)	Asap3
chr4	138865674	138867181	Promoter (<=1kb)	Akr7a5
chr4	141000297	141001507	Promoter (<=1kb)	Zbtb17
chr4	141100913	141103186	Promoter (<=1kb)	B330016D10Rik
chr4	141179610	141180006	Promoter (<=1kb)	Slc25a34
chr4	147822278	147823056	Promoter (<=1kb)	Mtor
chr4	148478019	148478700	Promoter (<=1kb)	Dffa
chr4	148859062	148860089	Promoter (<=1kb)	Nmnat1
chr4	149049990	149050504	Promoter (<=1kb)	Pik3cd
chr4	149461219	149461982	Promoter (<=1kb)	Gpr157
chr4	151235696	151236946	Promoter (<=1kb)	Camta1
chr4	151362294	151363388	Promoter (<=1kb)	Thap3
chr4	151401168	151402147	Promoter (<=1kb)	Zbtb48
chr4	153330892	153332081	Promoter (<=1kb)	A430005L14Rik
chr4	153348330	153349720	Promoter (<=1kb)	Dffb
chr4	155148528	155148924	Promoter (<=1kb)	Vwa1
chr4	155366248	155367530	Promoter (<=1kb)	B3galt6
chr5	20207325	20209145	Promoter (<=1kb)	Magi2
chr5	23217633	23218839	Promoter (<=1kb)	AI506816
chr5	23670539	23671236	Promoter (<=1kb)	Nupl2
chr5	23953334	23953892	Promoter (<=1kb)	Tmub1
chr5	25035178	25036179	Promoter (<=1kb)	1700096K18Rik
chr5	31251894	31252618	Promoter (<=1kb)	Abhd1
chr5	32912935	32914194	Promoter (<=1kb)	Yes1
chr5	35448004	35448889	Promoter (<=1kb)	Lrpap1
chr5	36099728	36100806	Promoter (<=1kb)	Ablim2
chr5	38870364	38871984	Promoter (<=1kb)	Slc2a9
chr5	48763288	48763928	Promoter (<=1kb)	Pacrgl
chr5	53060519	53061395	Promoter (<=1kb)	Sepsecs
chr5	53174036	53174659	Promoter (<=1kb)	Zcchc4
chr5	54200659	54201501	Promoter (<=1kb)	Tbc1d19
chr5	66395351	66395981	Promoter (<=1kb)	9130230L23Rik
chr5	66650845	66651642	Promoter (<=1kb)	Nsun7
chr5	72594246	72594962	Promoter (<=1kb)	Atp10d
chr5	75551703	75553338	Promoter (<=1kb)	Pdgfra
chr5	76612587	76613748	Promoter (<=1kb)	Tmem165
chr5	77334225	77335020	Promoter (<=1kb)	Aasdh
chr5	88354329	88354696	Promoter (<=1kb)	Csn3
chr5	88993647	88995192	Promoter (<=1kb)	Rufy3
chr5	90652105	90653471	Promoter (<=1kb)	Cox18
chr5	91359906	91361004	Promoter (<=1kb)	Mthfd2l
chr5	92390415	92392519	Promoter (<=1kb)	Thap6
chr5	92777722	92778599	Promoter (<=1kb)	Cxcl10
chr5	93473776	93474414	Promoter (<=1kb)	Sowahb
chr5	101148257	101149060	Promoter (<=1kb)	Hpse
chr5	102910193	102910874	Promoter (<=1kb)	Arhgap24
chr5	103273367	103274582	Promoter (<=1kb)	Arhgap24
chr5	104937014	104937982	Promoter (<=1kb)	BC005561
chr5	107788308	107789142	Promoter (<=1kb)	Brdt
chr5	108026277	108027197	Promoter (<=1kb)	Glmn
chr5	109089075	109090103	Promoter (<=1kb)	Dgkq
chr5	110536150	110537488	Promoter (<=1kb)	Gtpbp6
chr5	110564497	110565263	Promoter (<=1kb)	Chfr
chr5	112771676	112772716	Promoter (<=1kb)	Hps4
chr5	114185275	114186170	Promoter (<=1kb)	Ficd
chr5	114439638	114440035	Promoter (<=1kb)	Ssh1
chr5	114442371	114444215	Promoter (<=1kb)	Ssh1
chr5	114764939	114765432	Promoter (<=1kb)	Myo1h
chr5	114806575	114807616	Promoter (<=1kb)	Myo1h
chr5	115263499	115264142	Promoter (<=1kb)	1500011B03Rik
chr5	116081539	116082673	Promoter (<=1kb)	1110006O24Rik
chr5	121227587	121227836	Promoter (<=1kb)	Oas3
chr5	121262280	121262881	Promoter (<=1kb)	Oas1c
chr5	122068610	122069478	Promoter (<=1kb)	Acad12
chr5	122297970	122299233	Promoter (<=1kb)	Fam109a
chr5	122713966	122714744	Promoter (<=1kb)	Tctn1
chr5	122804018	122804928	Promoter (<=1kb)	Rad9b
chr5	123299643	123300757	Promoter (<=1kb)	Rnf34
chr5	123582278	123582924	Promoter (<=1kb)	Rhof
chr5	124380359	124381001	Promoter (<=1kb)	Ccdc62
chr5	124545089	124546332	Promoter (<=1kb)	Abcb9
chr5	124933073	124933849	Promoter (<=1kb)	Snrnp35
chr5	129513512	129514799	Promoter (<=1kb)	Stx2
chr5	130175572	130176328	Promoter (<=1kb)	Zfp11
chr5	130354858	130355271	Promoter (<=1kb)	Phkg1
chr5	130371207	130371910	Promoter (<=1kb)	2410018M08Rik
chr5	130504959	130505742	Promoter (<=1kb)	Crcp
chr5	132013031	132014728	Promoter (<=1kb)	Auts2
chr5	134659675	134660734	Promoter (<=1kb)	Gtf2ird2
chr5	135422469	135423136	Promoter (<=1kb)	Cldn4
chr5	135499041	135499870	Promoter (<=1kb)	Stx1a
chr5	135539736	135540618	Promoter (<=1kb)	Dnajc30
chr5	135553892	135554646	Promoter (<=1kb)	Vps37d
chr5	135643926	135644936	Promoter (<=1kb)	Bcl7b
chr5	135726609	135727346	Promoter (<=1kb)	Fzd9
chr5	136559470	136560272	Promoter (<=1kb)	Rasa4
chr5	136674383	136675275	Promoter (<=1kb)	Prkrip1
chr5	137505837	137506317	Promoter (<=1kb)	Vgf
chr5	137734488	137736239	Promoter (<=1kb)	Ufsp1
chr5	138311782	138313275	Promoter (<=1kb)	Pilrb2
chr5	138557765	138559085	Promoter (<=1kb)	Zscan21
chr5	138612114	138613783	Promoter (<=1kb)	Ap4m1
chr5	138635246	138636187	Promoter (<=1kb)	Mblac1
chr5	138704566	138705521	Promoter (<=1kb)	BC037034
chr5	138721014	138721715	Promoter (<=1kb)	Gpc2
chr5	138882422	138883152	Promoter (<=1kb)	Zfp157
chr5	139063795	139064377	Promoter (<=1kb)	A430033K04Rik
chr5	139819932	139821642	Promoter (<=1kb)	Cox19
chr5	139856128	139857444	Promoter (<=1kb)	Gpr146
chr5	139865616	139866084	Promoter (<=1kb)	Gpr146
chr5	140301745	140303118	Promoter (<=1kb)	Psmg3
chr5	141211268	141211927	Promoter (<=1kb)	Amz1
chr5	143026669	143027438	Promoter (<=1kb)	Radil
chr5	144518891	144519355	Promoter (<=1kb)	D130017N08Rik
chr5	145962365	145962957	Promoter (<=1kb)	Zkscan14
chr5	145964773	145966337	Promoter (<=1kb)	Zkscan5
chr5	147775115	147775723	Promoter (<=1kb)	Mtif3
chr5	148705931	148706687	Promoter (<=1kb)	Slc46a3
chr5	149552453	149553525	Promoter (<=1kb)	2210417A02Rik
chr5	150920988	150921397	Promoter (<=1kb)	Fry
chr5	151268726	151269179	Promoter (<=1kb)	Fry
chr5	151396262	151397499	Promoter (<=1kb)	N4bp2l1
chr6	6905607	6906575	Promoter (<=1kb)	Acn9
chr6	23082645	23083319	Promoter (<=1kb)	Aass
chr6	29128993	29129682	Promoter (<=1kb)	Prrt4
chr6	29268897	29269247	Promoter (<=1kb)	Fam71f1
chr6	34333981	34335261	Promoter (<=1kb)	Akr1b10
chr6	34730210	34731098	Promoter (<=1kb)	Agbl3
chr6	38612817	38613266	Promoter (<=1kb)	Clec2l
chr6	39067735	39068501	Promoter (<=1kb)	Parp12
chr6	42274039	42275662	Promoter (<=1kb)	Fam131b
chr6	42322370	42323588	Promoter (<=1kb)	Epha1
chr6	42594970	42595612	Promoter (<=1kb)	Fam115c
chr6	47780136	47780871	Promoter (<=1kb)	Zfp786
chr6	49268885	49269665	Promoter (<=1kb)	Ccdc126
chr6	51382494	51382985	Promoter (<=1kb)	Nfe2l3
chr6	54922216	54922851	Promoter (<=1kb)	Nod1
chr6	55153031	55154029	Promoter (<=1kb)	Fam188b
chr6	57530750	57531573	Promoter (<=1kb)	Herc6
chr6	65094643	65095251	Promoter (<=1kb)	Hpgds
chr6	83051219	83052536	Promoter (<=1kb)	Ccdc142
chr6	83074917	83075202	Promoter (<=1kb)	Ino80b
chr6	83105723	83106712	Promoter (<=1kb)	1700003E16Rik
chr6	83660350	83661572	Promoter (<=1kb)	Vax2
chr6	85865424	85866506	Promoter (<=1kb)	Cml1
chr6	88148173	88148859	Promoter (<=1kb)	Gata2
chr6	97756693	97757573	Promoter (<=1kb)	Mitf
chr6	108014804	108015929	Promoter (<=1kb)	Setmar
chr6	113025929	113027667	Promoter (<=1kb)	Gt(ROSA)26Sor
chr6	113421212	113421826	Promoter (<=1kb)	Il17rc
chr6	116599889	116600811	Promoter (<=1kb)	8430408G22Rik
chr6	124492244	124492775	Promoter (<=1kb)	C1s
chr6	124719029	124719837	Promoter (<=1kb)	Eno2
chr6	124813546	124814330	Promoter (<=1kb)	Gpr162
chr6	125165103	125166017	Promoter (<=1kb)	Vamp1
chr6	125553214	125554882	Promoter (<=1kb)	Vwf
chr6	128374386	128375173	Promoter (<=1kb)	Itfg2
chr6	128612180	128612720	Promoter (<=1kb)	Clec2h
chr6	131197095	131197625	Promoter (<=1kb)	Klra2
chr6	134590664	134592036	Promoter (<=1kb)	Loh12cr1
chr6	135147805	135148674	Promoter (<=1kb)	8430419L09Rik
chr7	3616677	3617509	Promoter (<=1kb)	Leng1
chr7	4100704	4102762	Promoter (<=1kb)	Leng9
chr7	4816766	4818139	Promoter (<=1kb)	Isoc2b
chr7	4989577	4990353	Promoter (<=1kb)	Zfp784
chr7	6106588	6108113	Promoter (<=1kb)	Zfp787
chr7	6237685	6238267	Promoter (<=1kb)	Zfp667
chr7	6314965	6316223	Promoter (<=1kb)	Zfp78
chr7	6335647	6336404	Promoter (<=1kb)	Zfp28
chr7	7073462	7074468	Promoter (<=1kb)	Zfp954
chr7	7123789	7124625	Promoter (<=1kb)	Zfp418
chr7	7162193	7162960	Promoter (<=1kb)	Zfp772
chr7	10034172	10034521	Promoter (<=1kb)	2810047C21Rik1
chr7	13007165	13008307	Promoter (<=1kb)	Zfp551
chr7	13466133	13466894	Promoter (<=1kb)	Zfp128
chr7	13550909	13552402	Promoter (<=1kb)	Zfp324
chr7	13619621	13620369	Promoter (<=1kb)	Chmp2a
chr7	13639428	13640464	Promoter (<=1kb)	Mzf1
chr7	16704983	16705779	Promoter (<=1kb)	Kptn
chr7	16858011	16859581	Promoter (<=1kb)	Prr24
chr7	17427992	17428701	Promoter (<=1kb)	Prkd2
chr7	17459563	17460928	Promoter (<=1kb)	Dact3
chr7	19495516	19496268	Promoter (<=1kb)	Ccdc61
chr7	19608746	19610308	Promoter (<=1kb)	Foxa3
chr7	19984880	19985444	Promoter (<=1kb)	Klc3
chr7	24896944	24898426	Promoter (<=1kb)	Zfp112
chr7	24918889	24919445	Promoter (<=1kb)	Zfp235
chr7	25022318	25022977	Promoter (<=1kb)	Zfp109
chr7	25039304	25040047	Promoter (<=1kb)	Zfp108
chr7	25055135	25055671	Promoter (<=1kb)	Zfp93
chr7	25084100	25084802	Promoter (<=1kb)	Zfp61
chr7	25101251	25102185	Promoter (<=1kb)	Zfp94
chr7	25917411	25918558	Promoter (<=1kb)	Pou2f2
chr7	26161497	26163544	Promoter (<=1kb)	4732471J01Rik
chr7	26180452	26181547	Promoter (<=1kb)	Lipe
chr7	26465469	26466206	Promoter (<=1kb)	B9d2
chr7	28458704	28460170	Promoter (<=1kb)	C030039L03Rik
chr7	28474155	28474708	Promoter (<=1kb)	C030039L03Rik
chr7	28516159	28517093	Promoter (<=1kb)	Zfp60
chr7	28623407	28623994	Promoter (<=1kb)	Zfp59
chr7	28645217	28646293	Promoter (<=1kb)	Zfp607
chr7	28763799	28764510	Promoter (<=1kb)	Zfp780b
chr7	29062628	29063136	Promoter (<=1kb)	Eid2b
chr7	30088656	30089944	Promoter (<=1kb)	Dpf1
chr7	30552008	30553861	Promoter (<=1kb)	Zfp84
chr7	30600726	30601466	Promoter (<=1kb)	Zfp790
chr7	30638285	30638900	Promoter (<=1kb)	Zfp940
chr7	30644813	30645329	Promoter (<=1kb)	Zfp420
chr7	30690906	30691702	Promoter (<=1kb)	Zfp27
chr7	30738526	30739348	Promoter (<=1kb)	Zfp74
chr7	30835973	30836691	Promoter (<=1kb)	Zfp14
chr7	30857092	30858898	Promoter (<=1kb)	Zfp82
chr7	30875090	30875860	Promoter (<=1kb)	Zfp82
chr7	30906496	30907503	Promoter (<=1kb)	Zfp382
chr7	30968845	30969411	Promoter (<=1kb)	Cox7a1
chr7	31093398	31093911	Promoter (<=1kb)	Alkbh6
chr7	31106565	31108265	Promoter (<=1kb)	Sdhaf1
chr7	31319776	31320594	Promoter (<=1kb)	Arhgap33
chr7	31344239	31345004	Promoter (<=1kb)	Lin37
chr7	34980682	34981899	Promoter (<=1kb)	Pdcd2l
chr7	36102994	36103611	Promoter (<=1kb)	Gpatch1
chr7	46772844	46773575	Promoter (<=1kb)	Zfp619
chr7	49947873	49948964	Promoter (<=1kb)	Gm5595
chr7	50568070	50569047	Promoter (<=1kb)	Zfp715
chr7	50817326	50818567	Promoter (<=1kb)	Zfp658
chr7	50834717	50835652	Promoter (<=1kb)	Zfp719
chr7	50927004	50927650	Promoter (<=1kb)	Ctu1
chr7	52003544	52004395	Promoter (<=1kb)	Vrk3
chr7	52070936	52072028	Promoter (<=1kb)	Nup62-il4i1
chr7	52151021	52151785	Promoter (<=1kb)	Fuz
chr7	52391558	52393163	Promoter (<=1kb)	Flt3l
chr7	53038727	53039446	Promoter (<=1kb)	Lmtk3
chr7	53151901	53153173	Promoter (<=1kb)	Syngr4
chr7	53894657	53895492	Promoter (<=1kb)	Sergef
chr7	59116949	59117998	Promoter (<=1kb)	Fancf
chr7	59134318	59135075	Promoter (<=1kb)	Gas2
chr7	63049231	63049879	Promoter (<=1kb)	Tubgcp5
chr7	63217369	63218264	Promoter (<=1kb)	A230056P14Rik
chr7	63274099	63275321	Promoter (<=1kb)	Nipa1
chr7	71518148	71519292	Promoter (<=1kb)	Fan1
chr7	73572117	73572610	Promoter (<=1kb)	Aldh1a3
chr7	73984190	73985022	Promoter (<=1kb)	Adamts17
chr7	74367120	74367904	Promoter (<=1kb)	Lysmd4
chr7	74789852	74790732	Promoter (<=1kb)	Lrrc28
chr7	74903845	74905006	Promoter (<=1kb)	Synm
chr7	82992771	82993829	Promoter (<=1kb)	Klhl25
chr7	85991658	85992424	Promoter (<=1kb)	Det1
chr7	86887574	86888266	Promoter (<=1kb)	Pex11a
chr7	87414345	87414849	Promoter (<=1kb)	Vps33b
chr7	87468903	87469673	Promoter (<=1kb)	Rccd1
chr7	87487839	87488191	Promoter (<=1kb)	Hddc3
chr7	88005130	88006221	Promoter (<=1kb)	Zscan2
chr7	88715792	88716854	Promoter (<=1kb)	Whamm
chr7	88933888	88934760	Promoter (<=1kb)	3110040N11Rik
chr7	91234873	91235461	Promoter (<=1kb)	9930013L23Rik
chr7	95578497	95579154	Promoter (<=1kb)	Rab38
chr7	96781038	96781759	Promoter (<=1kb)	Me3
chr7	97624297	97625137	Promoter (<=1kb)	Tmem126b
chr7	99709470	99710475	Promoter (<=1kb)	Ccdc90b
chr7	99784983	99786100	Promoter (<=1kb)	Ankrd42
chr7	104099691	104100509	Promoter (<=1kb)	Nars2
chr7	104480356	104481502	Promoter (<=1kb)	Kctd21
chr7	104601525	104602482	Promoter (<=1kb)	Kctd14
chr7	104886189	104886995	Promoter (<=1kb)	Aqp11
chr7	105986435	105987590	Promoter (<=1kb)	Wnt11
chr7	106976588	106977125	Promoter (<=1kb)	Neu3
chr7	107307618	107309065	Promoter (<=1kb)	Lipt2
chr7	107326914	107327322	Promoter (<=1kb)	Kcne3
chr7	108011315	108012217	Promoter (<=1kb)	Relt
chr7	108449924	108451025	Promoter (<=1kb)	Atg16l2
chr7	109713604	109714317	Promoter (<=1kb)	Trim21
chr7	111392679	111393370	Promoter (<=1kb)	Trim34a
chr7	111501739	111502235	Promoter (<=1kb)	Trim12c
chr7	112702595	112703341	Promoter (<=1kb)	Smpd1
chr7	112748571	112749014	Promoter (<=1kb)	Hpx
chr7	112781744	112782519	Promoter (<=1kb)	Trim3
chr7	125998793	125999736	Promoter (<=1kb)	Iqck
chr7	126937249	126938152	Promoter (<=1kb)	2610020H08Rik
chr7	127317117	127317571	Promoter (<=1kb)	Anks4b
chr7	127820592	127821648	Promoter (<=1kb)	BC030336
chr7	134387442	134388422	Promoter (<=1kb)	Zfp771
chr7	134488683	134489982	Promoter (<=1kb)	Zfp768
chr7	134519170	134519860	Promoter (<=1kb)	Zfp747
chr7	134536580	134537571	Promoter (<=1kb)	E430018J23Rik
chr7	134549891	134550573	Promoter (<=1kb)	Zfp764
chr7	134565069	134565951	Promoter (<=1kb)	Zfp688
chr7	134591830	134592956	Promoter (<=1kb)	Zfp689
chr7	134731499	134732462	Promoter (<=1kb)	Gm166
chr7	134943837	134945179	Promoter (<=1kb)	Hsd3b7
chr7	135380641	135382340	Promoter (<=1kb)	9130023H24Rik
chr7	135561281	135562228	Promoter (<=1kb)	Rgs10
chr7	138505816	138506917	Promoter (<=1kb)	2310057M21Rik
chr7	138514395	138515702	Promoter (<=1kb)	Pstk
chr7	138697198	138698371	Promoter (<=1kb)	Hmx2
chr7	139802201	139802694	Promoter (<=1kb)	Lhpp
chr7	140004723	140005969	Promoter (<=1kb)	Fam53b
chr7	140122476	140123553	Promoter (<=1kb)	Zranb1
chr7	140900325	140901251	Promoter (<=1kb)	Uros
chr7	144085956	144086666	Promoter (<=1kb)	Mgmt
chr7	147178230	147178677	Promoter (<=1kb)	Adam8
chr7	148264919	148266418	Promoter (<=1kb)	Pkp3
chr7	148316847	148317576	Promoter (<=1kb)	Ptdss2
chr7	148599774	148600601	Promoter (<=1kb)	Pddc1
chr7	149280897	149281825	Promoter (<=1kb)	Dusp8
chr7	152100316	152101466	Promoter (<=1kb)	Oraov1
chr7	152469066	152470540	Promoter (<=1kb)	Tpcn2
chr8	4165208	4166671	Promoter (<=1kb)	Evi5l
chr8	4226490	4227096	Promoter (<=1kb)	Lrrc8e
chr8	4612763	4613751	Promoter (<=1kb)	Zfp958
chr8	11476673	11479339	Promoter (<=1kb)	Rab20
chr8	23170324	23171396	Promoter (<=1kb)	Atp7b
chr8	23275822	23277176	Promoter (<=1kb)	Nek3
chr8	23337507	23338245	Promoter (<=1kb)	Thsd1
chr8	23763379	23764300	Promoter (<=1kb)	Polb
chr8	26707342	26708334	Promoter (<=1kb)	Letm2
chr8	28238535	28239405	Promoter (<=1kb)	Brf2
chr8	32221921	32223902	Promoter (<=1kb)	Rnf122
chr8	47084944	47085707	Promoter (<=1kb)	Ankrd37
chr8	63966192	63967078	Promoter (<=1kb)	Cbr4
chr8	70018424	70019404	Promoter (<=1kb)	Nat2
chr8	71612300	71613869	Promoter (<=1kb)	Slc18a1
chr8	71794726	71795242	Promoter (<=1kb)	D130040H23Rik
chr8	72148962	72149793	Promoter (<=1kb)	Zfp868
chr8	72178038	72178976	Promoter (<=1kb)	Zfp964
chr8	72240287	72241303	Promoter (<=1kb)	Zfp869
chr8	72273392	72274202	Promoter (<=1kb)	Zfp963
chr8	72356064	72356813	Promoter (<=1kb)	Pbx4
chr8	72595930	72597057	Promoter (<=1kb)	Tm6sf2
chr8	72662789	72663765	Promoter (<=1kb)	Mef2b
chr8	72676400	72676769	Promoter (<=1kb)	Mef2b
chr8	73894787	73895805	Promoter (<=1kb)	Ocel1
chr8	74082542	74083279	Promoter (<=1kb)	Tmem221
chr8	74431926	74432997	Promoter (<=1kb)	Zfp882
chr8	74474592	74475217	Promoter (<=1kb)	Zfp961
chr8	74958849	74959251	Promoter (<=1kb)	Calr3
chr8	80041289	80042480	Promoter (<=1kb)	0610038B21Rik
chr8	81818412	81819373	Promoter (<=1kb)	Mmaa
chr8	84926205	84927263	Promoter (<=1kb)	Il15
chr8	86590150	86591395	Promoter (<=1kb)	Rfx1
chr8	87583578	87584498	Promoter (<=1kb)	Fbxw9
chr8	89996311	89997178	Promoter (<=1kb)	Gm2694
chr8	106774548	106775585	Promoter (<=1kb)	Cklf
chr8	107057884	107059227	Promoter (<=1kb)	Car7
chr8	107793421	107794045	Promoter (<=1kb)	Hsf4
chr8	107849906	107850680	Promoter (<=1kb)	Lrrc29
chr8	108042320	108043174	Promoter (<=1kb)	Hsd11b2
chr8	108281985	108282831	Promoter (<=1kb)	Gfod2
chr8	112089168	112090191	Promoter (<=1kb)	Txnl4b
chr8	112228500	112231132	Promoter (<=1kb)	Zfp821
chr8	113917303	113918035	Promoter (<=1kb)	Fa2h
chr8	114515897	114516518	Promoter (<=1kb)	Adat1
chr8	116657212	116658161	Promoter (<=1kb)	Nudt7
chr8	118230640	118232354	Promoter (<=1kb)	Maf
chr8	119502358	119503209	Promoter (<=1kb)	1700030J22Rik
chr8	119680860	119682615	Promoter (<=1kb)	Gan
chr8	122385788	122386441	Promoter (<=1kb)	Klhl36
chr8	122637394	122638761	Promoter (<=1kb)	6430548M08Rik
chr8	123158072	123158787	Promoter (<=1kb)	1190005I06Rik
chr8	124473670	124474976	Promoter (<=1kb)	Banp
chr8	125200722	125202855	Promoter (<=1kb)	Cbfa2t3
chr8	125758578	125760440	Promoter (<=1kb)	Spata2l
chr8	127275277	127276012	Promoter (<=1kb)	Fam89a
chr8	127316677	127317524	Promoter (<=1kb)	Trim67
chr8	128092893	128094126	Promoter (<=1kb)	Sipa1l2
chr9	3334967	3335908	Promoter (<=1kb)	Alkbh8
chr9	3403315	3404836	Promoter (<=1kb)	Cwf19l2
chr9	7272275	7272674	Promoter (<=1kb)	Mmp13
chr9	8134051	8134629	Promoter (<=1kb)	AK129341
chr9	15513279	15514924	Promoter (<=1kb)	Slc36a4
chr9	20385570	20386236	Promoter (<=1kb)	Zfp846
chr9	20835168	20836693	Promoter (<=1kb)	Icam5
chr9	21069241	21069978	Promoter (<=1kb)	Atg4d
chr9	21216011	21216783	Promoter (<=1kb)	Qtrt1
chr9	21314125	21315261	Promoter (<=1kb)	Tmed1
chr9	21875074	21876043	Promoter (<=1kb)	Zfp653
chr9	21960045	21961706	Promoter (<=1kb)	Pigyl
chr9	22063952	22064676	Promoter (<=1kb)	Zfp599
chr9	22111698	22112483	Promoter (<=1kb)	Zfp810
chr9	22215638	22216279	Promoter (<=1kb)	9530077C05Rik
chr9	26806681	26807681	Promoter (<=1kb)	Acad8
chr9	26836586	26838503	Promoter (<=1kb)	Vps26b
chr9	27106444	27107200	Promoter (<=1kb)	Igsf9b
chr9	31087304	31088917	Promoter (<=1kb)	Prdm10
chr9	35018192	35019281	Promoter (<=1kb)	Foxred1
chr9	35074942	35075975	Promoter (<=1kb)	Fam118b
chr9	37015479	37016171	Promoter (<=1kb)	Tmem218
chr9	37062771	37063779	Promoter (<=1kb)	Slc37a2
chr9	37155467	37156252	Promoter (<=1kb)	Ccdc15
chr9	37420864	37421717	Promoter (<=1kb)	Spa17
chr9	39999624	40000470	Promoter (<=1kb)	Zfp202
chr9	40964937	40966115	Promoter (<=1kb)	Ubash3b
chr9	42752348	42753247	Promoter (<=1kb)	Grik4
chr9	43874764	43875475	Promoter (<=1kb)	Usp2
chr9	43892625	43893224	Promoter (<=1kb)	Usp2
chr9	44075607	44076460	Promoter (<=1kb)	Nlrx1
chr9	44127941	44128931	Promoter (<=1kb)	C2cd2l
chr9	44204654	44205458	Promoter (<=1kb)	Slc37a4
chr9	44225849	44226437	Promoter (<=1kb)	Ccdc84
chr9	44863083	44864417	Promoter (<=1kb)	Mpzl3
chr9	46090653	46091370	Promoter (<=1kb)	Bud13
chr9	48302994	48303959	Promoter (<=1kb)	Gm5617
chr9	48792865	48793879	Promoter (<=1kb)	Usp28
chr9	50336242	50337079	Promoter (<=1kb)	Pts
chr9	50554249	50554837	Promoter (<=1kb)	2310030G06Rik
chr9	50576039	50576915	Promoter (<=1kb)	Fdxacb1
chr9	50583091	50584174	Promoter (<=1kb)	Alg9
chr9	50884482	50885457	Promoter (<=1kb)	Layn
chr9	53212513	53213594	Promoter (<=1kb)	4930550C14Rik
chr9	54407718	54408376	Promoter (<=1kb)	Cib2
chr9	55388678	55389771	Promoter (<=1kb)	Isl2
chr9	56995799	56996378	Promoter (<=1kb)	Neil1
chr9	57287044	57288123	Promoter (<=1kb)	Ppcdc
chr9	63246447	63247593	Promoter (<=1kb)	2300009A05Rik
chr9	64026522	64027487	Promoter (<=1kb)	Snapc5
chr9	65283417	65284063	Promoter (<=1kb)	Mtfmt
chr9	65917368	65917807	Promoter (<=1kb)	Snx22
chr9	75458535	75459245	Promoter (<=1kb)	Tmod2
chr9	88442063	88443783	Promoter (<=1kb)	Zfp949
chr9	88614130	88615557	Promoter (<=1kb)	Gm2382
chr9	89105323	89106478	Promoter (<=1kb)	Mthfs
chr9	90057487	90058345	Promoter (<=1kb)	Adamts7
chr9	94568988	94571113	Promoter (<=1kb)	Slc9a9
chr9	96019401	96020192	Promoter (<=1kb)	Gk5
chr9	99142771	99144276	Promoter (<=1kb)	Cep70
chr9	102527954	102529124	Promoter (<=1kb)	Cep63
chr9	105033475	105034557	Promoter (<=1kb)	Nudt16
chr9	107198455	107199417	Promoter (<=1kb)	Cish
chr9	107240508	107240981	Promoter (<=1kb)	Hemk1
chr9	107242576	107243143	Promoter (<=1kb)	6430571L13Rik
chr9	107465228	107465851	Promoter (<=1kb)	Tusc2
chr9	107477399	107479367	Promoter (<=1kb)	Hyal1
chr9	107790155	107791198	Promoter (<=1kb)	Mon1a
chr9	107877620	107878301	Promoter (<=1kb)	Uba7
chr9	107951283	107951835	Promoter (<=1kb)	Gmppb
chr9	107955227	107955608	Promoter (<=1kb)	Amigo3
chr9	107981119	107982804	Promoter (<=1kb)	Mst1
chr9	108354711	108355430	Promoter (<=1kb)	Klhdc8b
chr9	108469062	108470148	Promoter (<=1kb)	Ndufaf3
chr9	108961547	108962483	Promoter (<=1kb)	Trex1
chr9	110378596	110379671	Promoter (<=1kb)	Kif9
chr9	110751703	110752217	Promoter (<=1kb)	Prss46
chr9	110782474	110783821	Promoter (<=1kb)	Tmie
chr9	110853492	110854131	Promoter (<=1kb)	Lrrc2
chr9	111592383	111592918	Promoter (<=1kb)	Stac
chr9	119065311	119066377	Promoter (<=1kb)	Acaa1b
chr9	119310818	119312796	Promoter (<=1kb)	Acvr2b
chr9	119353699	119355101	Promoter (<=1kb)	Exog
chr9	119890416	119893992	Promoter (<=1kb)	Csrnp1
chr9	120019301	120020178	Promoter (<=1kb)	Slc25a38
chr9	121404653	121405050	Promoter (<=1kb)	Cck
chr9	122929994	122930715	Promoter (<=1kb)	Tmem42
chrX	7151217	7152175	Promoter (<=1kb)	Ppp1r3f
chrX	7673447	7674308	Promoter (<=1kb)	Gm6787
chrX	9793372	9794277	Promoter (<=1kb)	Rpgr
chrX	19636294	19637002	Promoter (<=1kb)	Chst7
chrX	20538493	20539491	Promoter (<=1kb)	Uxt
chrX	20666069	20666910	Promoter (<=1kb)	Zfp300
chrX	23269754	23271532	Promoter (<=1kb)	Wdr44
chrX	34283544	34284031	Promoter (<=1kb)	Slc25a43
chrX	34730980	34732002	Promoter (<=1kb)	Ndufa1
chrX	45976409	45977223	Promoter (<=1kb)	Slc25a14
chrX	50622011	50623391	Promoter (<=1kb)	Fam122b
chrX	70473198	70474452	Promoter (<=1kb)	F8a
chrX	72329819	72331272	Promoter (<=1kb)	Gab3
chrX	72627504	72628030	Promoter (<=1kb)	Fundc2
chrX	72661488	72662230	Promoter (<=1kb)	Mtcp1
chrX	73009492	73010498	Promoter (<=1kb)	4933407K13Rik
chrX	90920223	90920627	Promoter (<=1kb)	Pcyt1b
chrX	91479555	91480738	Promoter (<=1kb)	Klhl15
chrX	92221347	92222338	Promoter (<=1kb)	Spin4
chrX	92361562	92362103	Promoter (<=1kb)	Arhgef9
chrX	92853530	92854058	Promoter (<=1kb)	Zc4h2
chrX	92906820	92907533	Promoter (<=1kb)	Zc3h12b
chrX	97170536	97171838	Promoter (<=1kb)	Eda
chrX	97925169	97925703	Promoter (<=1kb)	Gdpd2
chrX	99839178	99840142	Promoter (<=1kb)	Phka1
chrX	101677874	101679146	Promoter (<=1kb)	Uprt
chrX	109424560	109425398	Promoter (<=1kb)	Apool
chrX	119510630	119511297	Promoter (<=1kb)	Nap1l3
chrX	130810275	130811696	Promoter (<=1kb)	Trmt2b
chrX	131543261	131544152	Promoter (<=1kb)	Zmat1
chrX	132276737	132277797	Promoter (<=1kb)	Armcx5
chrX	133242307	133243304	Promoter (<=1kb)	Tceal1
chrX	133275709	133277617	Promoter (<=1kb)	BC065397
chrX	133511142	133511725	Promoter (<=1kb)	Tmsb15l
chrX	162878021	162879091	Promoter (<=1kb)	Ofd1
chrX	162947931	162948773	Promoter (<=1kb)	Tceanc
