# Supplementary material for: Smarca4 Inactivation Promotes Lineage-Specific Transformation and Early Metastatic Features in the Lung
Source: Oxford University Press journal article supplement (doi:10.1158/2159-8290.cd-21-0248), 2021-09-24
Supplement: 21598290cd210248-sup-261127_2_supp_7390486_qzc0xy.xlsx [file 21598290cd210248-sup-261127_2_supp_7390486_qzc0xy.xlsx]

## Sheet: DESeq2_norm_counts
Gene	KP_12_6627B	KP_14_2_6766B	KP_15_1_6764B	KP_2_6900B	KPS_10_1_6623B	KPS_13_6616B	KPS_7_1_6933B	KPS_HET_11_6762B	KPS_HET_5_6768B
0610005C13Rik	0	1.19556	5.72082	2.54946	4.93357	5.38814	2.84676	7.73475	1.74625
0610007C21Rik	1183.84	1547.06	1928.63	1147.26	1324.17	1883.15	2053.09	1328.83	1592.58
0610007L01Rik	2424.35	2265.59	2053.77	2433.46	3627.16	3137.69	3276.63	2605.07	2412.45
0610007N19Rik	46.8117	280.957	213.1	107.077	57.2294	133.805	154.864	44.8616	144.939
0610007P08Rik	542.03	602.564	722.253	622.068	599.922	574.735	467.439	805.961	736.92
0610007P14Rik	1119.78	964.82	878.86	852.793	930.471	763.32	769.196	875.574	1244.21
0610007P22Rik	426.233	405.296	502.717	472.924	485.463	585.511	367.802	450.163	418.228
0610008F07Rik	1.23189	4.78225	0	7.64837	1.97343	8.98023	9.10964	3.0939	0
0610009B14Rik	38.1885	45.4314	30.0343	25.4946	20.721	1.79605	0	13.9226	41.037
0610009B22Rik	533.407	649.191	741.561	550.683	634.457	631.31	479.964	476.461	561.421
0610009D07Rik	1786.24	1631.94	1882.86	1444.27	1758.32	1724.2	1950.6	1576.34	2345.22
0610009L18Rik	72.6813	54.9959	55.7779	70.1101	49.3357	48.4933	49.5337	46.4085	79.4546
0610009O20Rik	158.913	112.383	184.496	155.517	188.462	174.217	133.798	165.524	112.633
0610010B08Rik	468.117	407.687	493.42	619.518	447.968	397.824	387.16	522.869	474.981
0610010F05Rik	585.146	797.441	829.518	551.958	829.826	1091.1	951.958	850.823	735.173
0610010K14Rik	408.986	341.931	419.05	381.144	607.816	619.636	523.235	460.991	553.563
0610010O12Rik	3485.01	3284.21	4014.58	2942.07	4427.38	4727.19	5342.24	3875.11	3305.66
0610011F06Rik	1718.48	1278.06	1530.32	1254.33	1166.3	1116.24	1037.36	1560.87	1349.85
0610011L14Rik	793.335	930.149	843.105	833.673	735.102	703.152	1047.04	663.642	1087.92
0610012G03Rik	1018.77	808.201	876.715	930.552	966.979	903.411	940.571	787.398	890.59
0610030E20Rik	683.697	644.409	829.518	1075.87	743.982	734.583	565.937	1118.45	825.979
0610031J06Rik	2984.86	4458.26	3657.75	2982.87	3778.13	3709.73	3796.44	3276.44	2587.95
0610037L13Rik	857.393	459.096	574.227	526.463	775.557	615.146	640.522	552.261	687.151
0610037P05Rik	1023.7	1138.18	1159.18	675.606	952.179	1242.86	1178.56	863.199	819.867
0610038B21Rik	8.6232	8.36895	2.14531	10.1978	0.986713	8.98023	3.41612	13.9226	13.97
0610038L08Rik	9.85509	0	0	1.27473	4.93357	0	0.569353	7.73475	3.49251
0610039K10Rik	2.46377	4.78225	2.14531	7.64837	1.97343	3.59209	8.54029	1.54695	0.873127
0610040B10Rik	27.1015	16.7379	16.4473	5.09891	29.6014	16.1644	30.1757	23.2043	17.4625
0610040F04Rik	7.39132	7.17338	3.57551	0	2.96014	4.49012	11.3871	23.2043	0
0610040J01Rik	1542.32	1920.08	1135.58	1567.92	3986.32	3653.16	2716.95	2080.65	1424.94
0610043K17Rik	1.23189	3.58669	2.86041	0	0.986713	0	0.569353	1.54695	0
0910001L09Rik	1059.42	824.939	928.917	800.53	689.713	721.113	592.127	946.734	1280
100043387	4.92754	0	0	8.9231	0	0	51.2417	52.5963	27.9401
1100001G20Rik	34.4928	60.9737	50.0571	28.044	74.0035	229.894	933.169	38.6738	207.804
1110001A16Rik	432.392	444.75	478.403	333.979	470.662	484.933	465.731	399.113	539.593
1110001J03Rik	452.102	435.185	394.736	435.957	438.101	461.584	379.758	396.019	489.824
1110002B05Rik	1478.26	1255.34	1615.42	1194.42	1848.11	2316	1447.86	1299.44	2157.5
1110002L01Rik	104.71	194.877	215.961	122.374	110.512	204.749	91.0964	95.911	169.387
1110002N22Rik	237.754	282.153	249.571	150.418	223.984	211.035	163.974	198.01	248.841
1110003E01Rik	3215.22	4080.46	4395.02	2456.4	4721.42	6490.01	5127.02	3819.42	3316.14
1110004E09Rik	899.277	468.661	727.259	754.639	765.69	740.869	705.997	863.199	956.075
1110004F10Rik	2157.03	2331.35	2366.27	2128.8	2437.18	2938.33	3094.43	2168.83	2374.03
1110005A03Rik	220.508	124.339	258.152	265.144	332.522	274.795	361.539	249.059	267.177
1110006O24Rik	59.1305	25.1068	25.7437	21.6704	16.7741	32.3288	23.3435	29.3921	25.3207
1110007C09Rik	1148.12	1070.03	1377.29	865.541	994.607	1303.93	1147.25	1113.8	1098.39
1110008F13Rik	3429.57	4949.63	4601.68	3791.04	3288.72	2700.36	3020.99	3146.5	3674.12
1110008J03Rik	161.377	161.401	200.944	210.33	133.206	209.239	140.061	180.993	144.066
1110008L16Rik	322.754	435.185	313.215	428.309	258.519	335.861	300.049	394.472	403.385
1110008P14Rik	1238.05	812.983	836.669	778.859	540.719	683.396	561.382	799.774	1247.7
1110012J17Rik	2291.31	3119.23	2298.34	2179.79	1812.59	1208.74	1587.92	2529.26	2112.1
1110012L19Rik	457.03	500.941	655.033	470.375	409.486	521.752	351.291	411.489	325.677
1110014N23Rik	1372.32	1269.69	1191.36	1240.31	1296.54	1040.81	1085.76	1386.07	1237.22
1110017D15Rik	364.638	98.0362	127.288	280.44	148.007	120.335	165.112	281.545	332.662
1110017F19Rik	146.594	109.992	65.0743	86.6815	268.386	328.677	121.841	99.0049	95.1709
1110018G07Rik	688.624	816.57	855.977	785.233	552.56	628.616	630.273	609.499	699.375
1110018J18Rik	771.161	767.552	1065.5	558.331	452.901	504.689	573.908	628.062	619.047
1110019D14Rik	99.7828	69.3427	69.3649	54.8133	119.392	40.411	28.4676	75.8006	77.7083
1110020A21Rik	33.2609	70.5383	35.04	52.2639	42.4287	36.819	23.9128	32.486	46.2758
1110020G09Rik	553.117	1050.9	653.603	739.343	531.839	424.765	497.614	474.914	1073.95
1110021J02Rik	394.204	329.976	421.195	396.441	335.483	273.897	374.634	484.196	422.594
1110021L09Rik	505.073	797.441	557.779	560.881	443.034	318.798	382.605	372.815	574.518
1110028C15Rik	487.827	502.137	347.54	608.046	524.932	264.917	309.728	425.411	433.944
1110028F11Rik	2.46377	1.19556	1.4302	10.1978	7.89371	1.79605	9.679	18.5634	5.23876
1110028F18Rik	11.087	2.39113	0	1.27473	2.96014	9.87826	10.2483	10.8287	6.11189
1110031I02Rik	528.479	604.955	544.908	332.704	665.045	697.764	606.93	450.163	460.138
1110032A03Rik	618.407	499.746	517.019	467.825	704.513	1024.64	648.493	524.416	469.743
1110032A04Rik	448.407	565.502	568.506	933.101	254.572	439.133	156.003	558.449	550.943
1110032F04Rik	11.087	17.9335	0	0	49.3357	35.9209	14.8032	0	0.873127
1110034A24Rik	426.233	349.105	396.882	452.529	278.253	352.923	350.152	300.108	453.153
1110034B05Rik	215.58	233.135	198.083	342.902	325.615	310.716	302.326	199.557	343.139
1110034G24Rik	92.3915	114.774	117.277	93.0552	154.914	121.233	154.295	44.8616	206.931
1110036E04Rik	1.23189	0	4.29061	0	1.97343	2.69407	1.13871	0	2.61938
1110037F02Rik	636.885	731.685	668.62	755.914	984.74	620.534	569.353	804.414	761.367
1110038B12Rik	369.566	349.105	461.241	404.089	318.708	413.989	284.107	442.428	326.55
1110038D17Rik	538.334	448.336	608.552	506.067	532.825	533.426	733.896	408.395	440.929
1110038F14Rik	441.015	443.554	388.3	384.968	461.782	420.275	419.044	419.224	462.758
1110046J04Rik	120.725	51.4092	127.288	118.55	174.648	246.058	151.448	142.319	63.7383
1110049F12Rik	783.48	644.409	911.04	1086.07	758.783	757.034	842.642	719.332	961.313
1110050K14Rik	7.39132	0	3.57551	3.82419	9.86713	39.513	14.2338	0	3.49251
1110051M20Rik	460.725	457.901	525.6	498.419	652.218	518.159	823.853	491.93	578.883
1110054M08Rik	110.87	59.7782	88.6726	62.4617	78.9371	103.273	66.0449	109.834	77.7083
1110054O05Rik	372.03	321.607	396.882	400.265	507.171	426.561	613.193	423.865	465.377
1110057K04Rik	969.494	993.513	1020.45	1035.08	651.231	911.494	895.592	657.454	948.216
1110058L19Rik	587.61	911.02	676.486	474.199	556.506	554.08	398.547	426.958	598.965
1110059E24Rik	1210.94	1062.86	1102.69	757.189	982.767	1092.89	1076.08	1245.3	1457.25
1110059G10Rik	231.595	270.197	299.628	191.209	358.177	412.193	419.613	309.39	302.102
1110065P20Rik	364.638	288.131	365.417	367.122	403.566	360.107	370.079	323.313	419.101
1110067D22Rik	352.319	352.691	361.126	326.331	717.341	740.869	515.834	383.644	474.108
1190002F15Rik	88.6958	16.7379	12.1567	48.4397	61.1762	35.9209	25.0515	18.5634	68.9771
1190002H23Rik	8952.12	7841.7	15231	7076.02	6080.13	11779.4	13501.1	6809.68	13880.1
1190002N15Rik	261.16	292.913	421.195	582.551	199.316	313.41	163.974	324.86	317.818
1190003J15Rik	560.508	626.475	618.563	471.65	85.8441	297.246	188.456	716.238	543.958
1190005F20Rik	482.899	534.417	452.66	645.013	596.962	376.272	338.196	388.285	407.75
1190005I06Rik	41.8841	19.129	54.3477	30.5935	42.4287	20.6545	42.7015	43.3146	34.9251
1190007F08Rik	875.871	522.461	569.936	559.606	428.234	727.399	534.622	538.339	750.016
1190007I07Rik	135.507	135.099	171.624	175.913	181.555	187.687	133.229	174.805	150.178
1200009I06Rik	65.29	70.5383	82.2367	39.5166	14.8007	23.3486	15.3725	51.0494	55.8802
1200011I18Rik	670.146	827.33	946.795	775.035	1106.11	1132.41	1384.67	891.044	777.957
1200011M11Rik	489.059	609.737	583.523	785.233	694.646	598.982	495.337	504.306	806.77
1200014J11Rik	765.001	480.617	737.985	862.991	655.178	679.804	772.612	793.586	949.963
1200016B10Rik	1682.76	1346.2	1499.57	1305.32	869.295	924.066	870.54	1316.46	1696.49
1300001I01Rik	1831.81	2104.19	1651.17	2360.8	2532.89	1568.85	1990.46	1788.28	1831.82
1300002E11Rik	543.262	484.203	545.623	481.847	710.434	441.827	678.099	428.505	449.661
1300002K09Rik	3.69566	33.4758	30.7494	11.4726	27.628	36.819	26.1902	72.7067	42.7832
1300010F03Rik	794.567	720.925	652.173	752.09	726.221	1274.3	653.048	833.807	511.653
1300014I06Rik	846.306	893.086	1932.92	1487.61	1042.96	1482.64	1837.3	1257.67	1484.32
1300015D01Rik	1.23189	0	0.715102	0	1.97343	3.59209	1.70806	0	7.85815
1300017J02Rik	3.69566	0	0	0	0.986713	1.79605	3.98547	3.0939	0
1300018I17Rik	516.16	527.244	544.193	521.364	515.064	401.416	525.513	512.041	521.257
1300018J18Rik	1017.54	1215.89	1388.73	1130.68	902.843	1243.76	766.349	1031.82	791.053
1500001M20Rik	405.291	502.137	517.019	512.441	296.014	440.031	269.304	428.505	517.765
1500002O10Rik	49.2754	51.4092	21.4531	26.7693	16.7741	10.7763	0	23.2043	23.5744
1500002O20Rik	291.957	329.976	341.104	332.704	470.662	343.045	450.927	262.982	339.647
1500003O03Rik	2410.8	4246.64	4705.37	3061.9	3970.54	5013.66	4883.34	2770.59	3591.17
1500004A13Rik	77.6088	26.3024	77.231	93.0552	50.3224	100.579	46.6869	52.5963	55.007
1500009C09Rik	0	0	0.715102	0	0	0	9.679	3.0939	0
1500009L16Rik	20.9421	33.4758	8.58122	17.8462	3.94685	6.28616	21.0661	27.8451	41.037
1500010J02Rik	576.523	693.427	593.535	620.793	730.168	569.347	893.884	634.25	715.964
1500011B03Rik	611.016	774.725	624.999	414.287	643.337	1197.07	613.193	719.332	678.42
1500011H22Rik	984.277	718.534	838.099	759.738	770.623	611.554	374.634	852.37	1168.24
1500011K16Rik	423.769	416.056	433.352	336.528	304.894	370.884	290.939	332.594	375.445
1500012F01Rik	638.117	823.743	693.649	673.057	516.051	499.301	358.692	754.912	673.181
1500012K07Rik	52.9711	23.9113	29.3192	57.3628	32.5615	26.0427	48.9643	85.0823	46.2758
1500015A07Rik	107.174	82.4939	105.835	132.572	37.4951	80.8221	107.608	213.479	102.156
1500015L24Rik	11.087	7.17338	0	0	25.6546	26.9407	32.4531	6.1878	0
1500015O10Rik	41.8841	49.0181	37.9004	54.8133	31.5748	35.9209	41.5628	15.4695	80.3277
1500016L03Rik	7.39132	5.97782	1.4302	3.82419	3.94685	2.69407	3.41612	3.0939	4.36564
1500017E21Rik	6.15943	2.39113	4.29061	0	9.86713	0	0	0	16.5894
1500031L02Rik	528.479	530.83	451.944	530.287	540.719	390.64	335.918	533.698	404.258
1500032L24Rik	2217.4	1744.33	2110.98	1768.05	1606.37	1935.24	1819.65	1956.89	2356.57
1520402A15Rik	96.0871	157.814	132.294	98.1541	153.927	75.434	135.506	126.85	118.745
1600002D24Rik	11.087	3.58669	0	2.54946	0	2.69407	0	0	0
1600002H07Rik	177.392	173.357	175.2	249.847	133.206	126.621	96.2206	194.916	168.514
1600002K03Rik	304.276	139.881	188.072	206.506	232.864	181.401	216.923	170.165	281.147
1600010M07Rik	6.15943	7.17338	5.72082	10.1978	1.97343	3.59209	22.7741	4.64085	51.5145
1600012F09Rik	1900.8	1833.99	1782.75	1291.3	1914.22	1708.94	1361.89	1639.77	1894.69
1600012H06Rik	1038.48	1364.14	1228.55	1293.85	1422.84	1320.99	1391.5	1282.42	1028.54
1600014C10Rik	273.479	310.847	268.163	280.44	277.266	245.16	241.406	233.59	233.125
1600014C23Rik	0	1.19556	2.14531	5.09891	19.7343	7.18419	1.70806	10.8287	7.85815
1600016N20Rik	96.0871	157.814	148.026	156.792	153.927	203.851	196.996	211.932	70.7233
1600020E01Rik	285.798	316.824	336.098	367.122	257.532	325.084	292.647	300.108	325.677
1600021P15Rik	45.5798	27.498	25.0286	16.5715	26.6413	7.18419	133.798	7.73475	51.5145
1600027N09Rik	266.087	168.574	199.513	244.748	233.851	279.285	249.946	235.137	221.774
1600029D21Rik	2088.05	1350.99	4061.06	3504.23	640.377	858.51	3258.98	2058.99	2450
1600029I14Rik	96.0871	23.9113	26.4588	73.9343	48.349	53.8814	22.2048	35.5799	89.9321
1600029O15Rik	33.2609	10.7601	17.1624	40.7913	19.7343	18.8585	26.1902	30.939	23.5744
1700001C02Rik	168.768	45.4314	27.889	123.649	74.9902	92.4964	81.9868	97.4579	131.842
1700001C19Rik	0	0	2.86041	1.27473	4.93357	13.4703	3.41612	10.8287	2.61938
1700001D01Rik	6.15943	2.39113	2.86041	8.9231	0.986713	7.18419	3.41612	6.1878	9.6044
1700001G17Rik	3.69566	9.56451	17.1624	19.1209	0.986713	3.59209	3.41612	9.28171	12.2238
1700001J11Rik	9.85509	26.3024	21.4531	10.1978	19.7343	1.79605	0	21.6573	23.5744
1700001K19Rik	0	2.39113	0	5.09891	0	0.898023	6.83223	9.28171	5.23876
1700001L05Rik	52.9711	68.1471	40.7608	73.9343	46.3755	54.7794	76.8626	86.6293	69.8502
1700001L19Rik	151.522	34.6713	56.4931	101.978	117.419	52.9834	70.0304	78.8945	96.9171
1700001O22Rik	16.0145	9.56451	18.5926	12.7473	10.8538	30.5328	18.2193	3.0939	8.73127
1700001P01Rik	9.85509	1.19556	1.4302	0	0.986713	3.59209	0	7.73475	3.49251
1700003D09Rik	0	4.78225	0	1.27473	0	5.38814	4.55482	0	5.23876
1700003E16Rik	202.029	68.1471	107.265	131.297	123.339	80.8221	74.5852	94.364	150.178
1700003F12Rik	1.23189	9.56451	2.14531	0	3.94685	20.6545	6.26288	6.1878	6.11189
1700003G18Rik	0	0	0.715102	1.27473	12.8273	0	1.13871	0	2.61938
1700003M02Rik	236.522	51.4092	41.4759	211.605	148.994	96.0885	88.819	174.805	213.916
1700003M07Rik	59.1305	16.7379	11.4416	36.9671	27.628	41.3091	25.0515	35.5799	32.3057
1700007G11Rik	174.928	50.2137	32.8947	113.451	80.9105	59.2695	42.1321	88.1762	68.1039
1700007J10Rik	45.5798	10.7601	16.4473	22.9451	28.6147	31.4308	52.9498	40.2207	33.1788
1700007K13Rik	421.305	106.405	134.439	272.792	161.821	126.621	99.0674	368.174	365.84
1700007L15Rik	80.0726	39.4536	64.3592	38.2419	29.6014	52.0854	37.5773	78.8945	82.9471
1700007P06Rik	11.087	5.97782	12.8718	12.7473	6.90699	8.08221	11.9564	10.8287	18.3357
1700008J07Rik	107.174	68.1471	59.3535	105.802	107.552	81.7201	108.746	74.2536	75.9621
1700008O03Rik	13.5507	2.39113	5.00571	3.82419	3.94685	4.49012	8.54029	0	0.873127
1700008P20Rik	6.15943	0	8.58122	26.7693	14.8007	29.6348	0	17.0165	57.6264
1700009P17Rik	299.348	115.97	123.713	232.001	92.7511	211.035	128.104	230.496	273.289
1700010B08Rik	3.69566	4.78225	0.715102	6.37364	0.986713	3.59209	1.13871	3.0939	0.873127
1700010I02Rik	20.9421	9.56451	2.14531	33.1429	2.96014	10.7763	92.8045	60.3311	21.8282
1700010I14Rik	0	0	0	0	5.92028	7.18419	0	0	0
1700011A15Rik	0	0	5.72082	5.09891	0	6.28616	10.2483	15.4695	0.873127
1700011H14Rik	1.23189	11.9556	0	1.27473	2.96014	3.59209	0	21.6573	0.873127
1700011I03Rik	4.92754	0	0.715102	1.27473	0	1.79605	1.70806	0	0.873127
1700011J10Rik	269.783	188.899	250.286	193.759	124.326	152.664	140.061	177.899	299.483
1700012A16Rik	3.69566	2.39113	7.15102	1.27473	3.94685	0	10.8177	4.64085	0.873127
1700012B09Rik	1.23189	2.39113	0	1.27473	0	0	3.98547	7.73475	11.3507
1700012B15Rik	83.7683	80.1028	76.5159	82.8574	133.206	152.664	160.557	111.38	174.625
1700012D01Rik	41.8841	34.6713	17.1624	22.9451	18.7476	5.38814	10.2483	26.2982	40.1639
1700012D14Rik	4.92754	7.17338	6.43592	7.64837	3.94685	8.98023	14.2338	18.5634	19.2088
1700013F07Rik	36.9566	16.7379	16.4473	52.2639	40.4553	26.9407	37.5773	54.1433	104.775
1700013G23Rik	12.3189	5.97782	4.29061	1.27473	2.96014	11.6743	7.40159	1.54695	4.36564
1700013H16Rik	1.23189	0	25.0286	0	0	6.28616	0	0	7.85815
1700013N18Rik	0	9.56451	0	0	3.94685	2.69407	2.27741	13.9226	34.052
1700015E13Rik	11.087	0	2.86041	1.27473	0	14.3684	5.69353	0	0
1700015F17Rik	7.39132	0	1.4302	0	0	2.69407	0	0	0
1700016C15Rik	20.9421	13.1512	62.929	12.7473	46.3755	82.6181	7.97094	24.7512	7.85815
1700016D06Rik	162.609	51.4092	65.0743	144.044	84.8574	83.5162	152.017	198.01	155.417
1700016G22Rik	3.69566	1.19556	5.72082	0	0	0.898023	0.569353	0	0.873127
1700016H13Rik	8.6232	8.36895	0	5.09891	5.92028	0.898023	3.41612	0	5.23876
1700016K19Rik	241.45	51.4092	97.2539	149.143	151.954	146.378	88.819	131.491	208.677
1700016M24Rik	0	0	0	0	0	8.98023	0	0	0
1700017B05Rik	567.9	879.935	1023.31	827.299	820.946	891.737	1044.19	986.955	704.614
1700018A04Rik	13.5507	7.17338	6.43592	8.9231	3.94685	7.18419	7.97094	13.9226	9.6044
1700018F24Rik	0	0	0	3.82419	7.89371	0	0	0	0
1700018L02Rik	12.3189	19.129	16.4473	6.37364	19.7343	44.0031	31.8838	32.486	23.5744
1700019B03Rik	0	0	0	1.27473	4.93357	4.49012	0	9.28171	0
1700019D03Rik	23.4058	28.6935	2.86041	10.1978	1.97343	8.98023	25.6209	17.0165	40.1639
1700019E19Rik	1075.44	614.52	865.988	786.508	866.334	786.668	1007.75	904.966	1117.6
1700019G17Rik	234.058	701.796	541.332	483.122	283.187	306.226	195.288	400.66	187.722
1700019L03Rik	124.421	22.7157	45.0514	84.1321	31.5748	30.5328	37.5773	74.2536	68.9771
1700019N12Rik	6.15943	0	0	0	5.92028	3.59209	4.55482	0	14.8432
1700020D05Rik	2.46377	0	2.86041	0	0	0	3.98547	6.1878	0.873127
1700020G17Rik	1.23189	1.19556	1.4302	2.54946	1.97343	3.59209	4.55482	6.1878	3.49251
1700020I14Rik	396.667	551.155	800.199	764.837	669.978	561.265	596.112	584.747	672.308
1700020L24Rik	0	2.39113	0.715102	0	1.97343	0.898023	7.97094	0	0.873127
1700020N18Rik	8.6232	0	3.57551	3.82419	6.90699	7.18419	2.27741	0	1.74625
1700020O03Rik	289.493	328.78	513.443	348.001	621.629	372.68	556.827	334.141	298.61
1700021C14Rik	28.3334	35.8669	52.2024	31.8682	25.6546	35.9209	39.8547	52.5963	45.4026
1700021F05Rik	253.769	272.589	289.616	307.21	263.453	254.141	190.733	332.594	310.833
1700021K19Rik	1144.42	1191.98	976.114	994.288	1057.76	489.423	645.077	836.9	674.927
1700022I11Rik	12.3189	0	0	0	1.97343	9.87826	0	0	14.8432
1700022P22Rik	1.23189	0	0	0	1.97343	0	1.70806	7.73475	1.74625
1700023E05Rik	34.4928	23.9113	7.86612	26.7693	9.86713	15.2664	21.6354	13.9226	36.6714
1700023F06Rik	0	11.9556	3.57551	0	5.92028	5.38814	3.98547	0	0
1700023L04Rik	43.116	8.36895	8.58122	14.022	18.7476	14.3684	10.2483	9.28171	17.4625
1700024G13Rik	25.8696	0	6.43592	25.4946	43.4154	26.9407	10.2483	12.3756	7.85815
1700024P16Rik	0	51.4092	25.7437	2.54946	0	0	0	0	5.23876
1700025C18Rik	4.92754	0	0.715102	2.54946	0.986713	0.898023	2.27741	1.54695	2.61938
1700025E21Rik	0	0	0	3.82419	3.94685	0	0	0	8.73127
1700025G04Rik	139.203	26.3024	42.191	38.2419	14.8007	61.0656	38.716	34.0329	108.268
1700025K23Rik	50.5073	69.3427	22.8833	20.3957	50.3224	43.1051	21.6354	80.4414	71.5964
1700025K24Rik	6.15943	2.39113	7.86612	7.64837	5.92028	9.87826	3.41612	7.73475	7.85815
1700025N23Rik	75.1451	40.6492	38.6155	70.1101	35.5217	69.1478	69.461	123.756	82.074
1700026D08Rik	87.4639	39.4536	34.3249	121.099	85.8441	45.7992	50.103	77.3475	159.782
1700026D11Rik	1.23189	2.39113	2.14531	3.82419	2.96014	0	0	3.0939	1.74625
1700026L06Rik	381.885	35.8669	89.3877	189.935	111.499	180.503	54.0885	267.623	295.117
1700027A23Rik	481.668	166.183	197.368	309.759	272.333	166.134	129.243	354.252	464.504
1700027D21Rik	3.69566	0	0	0	2.96014	0	0	0	3.49251
1700028D13Rik	0	0	0	8.9231	5.92028	6.28616	1.13871	9.28171	4.36564
1700028E10Rik	6.15943	2.39113	15.0171	3.82419	7.89371	7.18419	3.41612	32.486	15.7163
1700028J19Rik	39.4204	19.129	12.8718	11.4726	7.89371	11.6743	0	17.0165	11.3507
1700028K03Rik	27.1015	2.39113	7.15102	2.54946	12.8273	22.4506	29.037	7.73475	2.61938
1700028P14Rik	66.5219	11.9556	33.6098	44.6155	28.6147	23.3486	26.1902	27.8451	28.8132
1700029F09Rik	618.407	541.59	530.606	541.76	603.869	634.004	509.001	405.301	589.361
1700029F12Rik	2.46377	3.58669	2.86041	1.27473	2.96014	4.49012	5.69353	7.73475	5.23876
1700029G01Rik	333.841	291.718	344.679	332.704	420.34	495.709	741.867	344.97	448.787
1700029I01Rik	59.1305	109.992	45.7665	135.121	122.352	81.7201	104.761	78.8945	65.4846
1700029I15Rik	6.15943	9.56451	7.15102	3.82419	4.93357	4.49012	7.97094	3.0939	13.97
1700029J07Rik	152.754	129.121	66.5045	100.704	37.4951	149.072	115.579	145.413	112.633
1700029J11Rik	1.23189	0	0	5.09891	0.986713	16.1644	2.84676	0	0
1700030C10Rik	29.5653	21.5201	37.1853	21.6704	21.7077	25.1447	40.424	43.3146	52.3876
1700030J22Rik	110.87	22.7157	52.9175	73.9343	32.5615	28.7367	128.104	133.038	49.7683
1700030K09Rik	209.421	263.024	220.251	191.209	277.266	346.637	225.464	247.512	133.588
1700034E13Rik	0	0	0.715102	2.54946	0	7.18419	0	0	0
1700034F02Rik	8.6232	0	0	3.82419	3.94685	0	4.55482	0	1.74625
1700034H14Rik	396.667	466.27	552.774	550.683	433.167	295.45	367.802	465.632	561.421
1700034H15Rik	32.029	16.7379	15.7322	48.4397	15.7874	32.3288	17.0806	40.2207	38.4176
1700034I23Rik	0	9.56451	0	1.27473	36.5084	2.69407	0	6.1878	0
1700034J05Rik	1.23189	5.97782	0	2.54946	0	9.87826	0	12.3756	1.74625
1700034P13Rik	3.69566	7.17338	11.4416	24.2198	6.90699	17.9605	10.2483	32.486	12.2238
1700037C18Rik	182.319	86.0806	93.6784	130.022	100.645	101.477	117.287	128.397	126.603
1700037H04Rik	698.479	955.255	955.376	619.518	843.64	843.244	1051.03	768.835	772.718
1700040I03Rik	333.841	276.175	305.349	276.616	292.067	258.631	191.303	358.893	308.214
1700040L02Rik	32.029	46.627	31.4645	34.4177	33.5483	35.9209	37.0079	4.64085	46.2758
1700040N02Rik	4.92754	0	0	0	0	1.79605	1.70806	1.54695	0
1700045H11Rik	2.46377	1.19556	2.14531	3.82419	0	0.898023	3.41612	0	2.61938
1700045I19Rik	0	7.17338	6.43592	0	19.7343	0	16.5112	0	0
1700047I17Rik2	3233.7	1697.7	3571.22	2832.45	2850.62	3073.04	5713.45	2250.81	2477.94
1700048M11Rik	1.23189	0	0	5.09891	3.94685	1.79605	9.10964	4.64085	0
1700048O20Rik	81.3045	34.6713	34.3249	52.2639	74.9902	70.9438	50.103	112.927	59.3727
1700049E15Rik	41.8841	133.903	12.8718	130.022	0	4.49012	0	9.28171	45.4026
1700049G17Rik	257.464	173.357	316.79	145.319	107.552	154.46	336.487	278.451	94.2978
1700052K11Rik	146.594	135.099	139.445	91.7805	230.891	255.937	289.801	202.651	225.267
1700052N19Rik	219.276	246.286	283.895	202.682	284.173	347.535	306.881	267.623	185.976
1700054N08Rik	19.7102	5.97782	17.8775	14.022	12.8273	34.1249	17.0806	29.3921	56.7533
1700055N04Rik	16.0145	0	14.302	0	0	0	10.2483	0	4.36564
1700056E22Rik	19.7102	26.3024	5.72082	16.5715	13.814	30.5328	30.1757	7.73475	2.61938
1700057H15Rik	0	0	0.715102	0	0.986713	1.79605	3.98547	1.54695	0.873127
1700061G19Rik	25.8696	10.7601	17.1624	7.64837	12.8273	7.18419	20.4967	12.3756	4.36564
1700061I17Rik	1.23189	1.19556	0.715102	3.82419	3.94685	16.1644	0	4.64085	6.98502
1700061J05Rik	0	0	7.15102	0	0	0	0	0	0
1700063D05Rik	12.3189	13.1512	23.5984	22.9451	18.7476	27.8387	27.3289	46.4085	29.6863
1700064J06Rik	61.5943	10.7601	42.9061	22.9451	26.6413	35.0229	7.40159	32.486	85.5665
1700065D16Rik	18.4783	5.97782	11.4416	15.2967	12.8273	14.3684	12.5258	29.3921	24.4476
1700066B19Rik	163.841	202.05	63.6441	54.8133	138.14	47.5952	47.2563	327.954	100.41
1700066J24Rik	2.46377	1.19556	0	1.27473	0	4.49012	1.13871	1.54695	0
1700066M21Rik	174.928	136.294	188.072	258.77	119.392	220.016	112.162	177.899	157.163
1700067G17Rik	0	0	2.14531	1.27473	0	3.59209	5.12417	0	2.61938
1700067K01Rik	18.4783	0	2.86041	15.2967	1.97343	9.87826	9.679	24.7512	4.36564
1700071M16Rik	0	11.9556	2.86041	29.3188	11.8406	0	14.2338	0	29.6863
1700073E17Rik	6.15943	5.97782	5.72082	15.2967	7.89371	8.98023	8.54029	18.5634	8.73127
1700081L11Rik	716.958	973.189	1005.43	915.255	918.63	1133.31	1129.6	1005.52	911.545
1700084C01Rik	2.46377	0	0	1.27473	1.97343	0	22.2048	0	7.85815
1700084E18Rik	16.0145	27.498	20.0229	8.9231	3.94685	2.69407	6.26288	6.1878	3.49251
1700086L19Rik	11.087	0	0	5.09891	27.628	26.9407	28.4676	0	0
1700086O06Rik	61.5943	59.7782	46.4816	86.6815	93.7378	70.0458	55.7966	46.4085	61.1189
1700088E04Rik	496.45	227.157	175.915	303.385	190.436	212.832	205.536	283.092	339.647
1700092M07Rik	0	0	4.29061	2.54946	1.97343	0	3.98547	7.73475	1.74625
1700094D03Rik	431.16	235.526	223.112	507.342	313.775	414.887	293.217	502.759	488.078
1700096K18Rik	147.826	106.405	126.573	77.7584	92.7511	102.375	126.966	112.927	131.842
1700097N02Rik	3.69566	0	0	6.37364	5.92028	1.79605	0.569353	0	15.7163
1700101E01Rik	27.1015	14.3468	15.7322	11.4726	6.90699	15.2664	20.4967	17.0165	2.61938
1700101I11Rik	3.69566	0	12.1567	5.09891	0	0	0	0	0
1700102H20Rik	11.087	13.1512	12.8718	16.5715	13.814	10.7763	3.98547	6.1878	13.0969
1700102P08Rik	7.39132	7.17338	2.86041	0	1.97343	8.08221	10.2483	0	3.49251
1700105P06Rik	1.23189	0	0	2.54946	3.94685	0	3.98547	0	9.6044
1700106N22Rik	162.609	184.117	120.852	154.242	181.555	78.128	210.661	143.866	154.544
1700109H08Rik	2.46377	2.39113	0	8.9231	3.94685	5.38814	7.40159	9.28171	4.36564
1700110C19Rik	4.92754	0	1.4302	0	1.97343	0	1.13871	4.64085	1.74625
1700110K17Rik	6.15943	0	2.14531	21.6704	8.88042	0	2.27741	0	0.873127
1700110M21Rik	1.23189	4.78225	0	1.27473	0	0	0.569353	4.64085	0
1700112E06Rik	171.232	143.468	163.043	147.869	116.432	119.437	103.622	190.275	185.103
1700113A16Rik	179.855	163.792	175.915	133.847	138.14	159.848	137.783	92.8171	182.484
1700113H08Rik	1.23189	0	7.15102	0	0	0	0	0	0
1700113I22Rik	161.377	172.161	140.16	136.396	83.8706	135.602	53.5192	145.413	140.574
1700120C14Rik	4.92754	0	1.4302	17.8462	2.96014	1.79605	9.679	1.54695	2.61938
1700120E14Rik	23.4058	4.78225	0.715102	8.9231	3.94685	1.79605	1.70806	10.8287	20.0819
1700120K04Rik	9.85509	1.19556	2.14531	1.27473	6.90699	3.59209	3.98547	4.64085	6.11189
1700121L16Rik	3.69566	2.39113	4.29061	3.82419	7.89371	0.898023	1.13871	6.1878	3.49251
1700123I01Rik	2.46377	0	5.72082	3.82419	7.89371	6.28616	6.83223	7.73475	11.3507
1700123M08Rik	18.4783	19.129	25.7437	33.1429	37.4951	43.1051	14.8032	21.6573	40.1639
1700123O20Rik	826.596	1231.43	1056.21	1109.01	994.607	842.346	1070.95	951.375	929.881
1700125D06Rik	4.92754	1.19556	5.00571	7.64837	0.986713	17.0624	3.41612	12.3756	17.4625
1700125G22Rik	0	0	1.4302	5.09891	2.96014	0.898023	1.13871	1.54695	2.61938
1700125H20Rik	4.92754	1.19556	5.72082	0	12.8273	17.9605	17.6499	3.0939	7.85815
1700128F08Rik	97.319	43.0403	30.0343	63.7364	56.2427	66.4537	69.461	78.8945	94.2978
1810006J02Rik	0	0	11.4416	0	0	0	0	0	0.873127
1810006K21Rik	3331.02	3689.51	2781.03	2456.4	2457.9	2548.59	2204.53	2970.15	3018.4
1810007D17Rik	1.23189	1.19556	2.14531	2.54946	0.986713	0.898023	1.13871	6.1878	7.85815
1810007I06Rik	3.69566	7.17338	2.14531	5.09891	0	18.8585	3.41612	4.64085	6.98502
1810008A18Rik	384.349	536.808	523.455	504.793	481.516	652.863	461.745	519.776	480.22
1810008I18Rik	92.3915	62.1693	57.2082	53.5386	45.3888	67.3517	15.9419	77.3475	54.1339
1810009A15Rik	767.465	667.125	594.965	652.661	526.905	607.962	464.022	594.029	766.606
1810010D01Rik	145.363	247.482	150.171	63.7364	14.8007	73.6379	70.5997	140.773	89.9321
1810010H24Rik	894.349	235.526	686.498	191.209	552.56	376.272	408.226	688.393	1108.87
1810011H11Rik	0	0	0	0	2.96014	20.6545	59.782	0	34.052
1810011O10Rik	630.726	720.925	688.643	743.167	60.1895	188.585	112.162	734.802	246.222
1810012K16Rik	4.92754	0	9.29632	11.4726	10.8538	0	4.55482	6.1878	0
1810012P15Rik	152.754	315.629	201.659	184.836	184.515	170.624	312.005	162.43	170.26
1810013A23Rik	2.46377	0	0.715102	6.37364	1.97343	0.898023	0	1.54695	1.74625
1810013D10Rik	1020	1451.41	1459.52	1077.15	1074.53	1234.78	1027.68	1155.57	995.365
1810013L24Rik	1379.71	1021.01	1224.25	1189.32	1475.14	1273.4	1441.6	1198.89	1046.88
1810014B01Rik	140.435	168.574	154.462	118.55	113.472	127.519	54.0885	71.1597	96.9171
1810014F10Rik	243.913	169.77	185.211	246.023	127.286	98.7826	210.661	201.104	219.155
1810018F18Rik	7.39132	4.78225	0	5.09891	0.986713	0	3.98547	3.0939	6.11189
1810019D21Rik	954.712	692.231	650.743	891.035	763.716	854.02	783.429	921.983	802.404
1810019J16Rik	752.682	682.667	823.797	929.277	1054.8	977.947	809.62	725.52	819.867
1810020D17Rik	368.334	344.322	311.784	341.627	335.483	304.43	228.88	408.395	452.28
1810020O05Rik	23.4058	0	3.57551	0	0	3.59209	0	1.54695	10.4775
1810021B22Rik	49.2754	39.4536	17.8775	19.1209	34.535	33.2269	17.0806	13.9226	41.9101
1810022K09Rik	1712.32	1943.99	2126	1593.41	2005.99	2133.7	1733.68	1856.34	1863.25
1810024B03Rik	13.5507	9.56451	10.7265	12.7473	21.7077	17.9605	12.5258	17.0165	12.2238
1810026B05Rik	817.972	462.683	860.268	625.892	946.258	894.431	895.023	1042.64	1136.81
1810026J23Rik	752.682	1025.79	912.47	995.563	1020.26	977.947	877.942	934.358	795.419
1810027O10Rik	1305.8	989.927	991.131	852.793	816.012	1119.84	1107.96	1112.26	1295.72
1810029B16Rik	124.421	157.814	196.653	161.891	178.595	237.976	178.777	163.977	141.447
1810030N24Rik	199.566	246.286	367.562	244.748	292.067	408.601	232.865	283.092	265.431
1810030O07Rik	1162.9	897.868	1080.52	1097.54	1012.37	1092.89	1237.77	1259.22	1183.96
1810031K17Rik	1730.8	2119.73	2018.73	2006.42	1901.4	2037.61	2131.66	1587.17	1559.41
1810032O08Rik	145.363	174.552	184.496	166.989	149.98	132.009	170.806	239.777	205.185
1810033B17Rik	39.4204	43.0403	58.6384	50.9891	168.728	211.933	1060.13	24.7512	333.535
1810034E14Rik	35.7247	26.3024	39.3306	40.7913	9.86713	2.69407	53.5192	35.5799	20.0819
1810035I16Rik	68.9856	16.7379	19.3078	47.165	36.5084	39.513	29.037	57.2372	58.4995
1810035L17Rik	1222.03	857.219	936.068	748.266	757.796	949.211	805.634	781.21	1112.36
1810037I17Rik	2264.21	2925.54	2697.36	1774.42	2132.29	2882.65	2525.65	2722.63	2896.16
1810041L15Rik	2.46377	5.97782	0.715102	0	0	12.5723	0	0	0.873127
1810043G02Rik	471.812	376.603	571.366	447.43	622.616	721.113	413.919	479.555	532.608
1810043H04Rik	490.291	418.447	442.648	386.243	444.021	544.202	479.964	437.787	604.204
1810044D09Rik	44.3479	44.2359	32.1796	16.5715	57.2294	53.8814	48.9643	55.6902	38.4176
1810046J19Rik	1991.96	1768.24	1828.52	1490.16	1599.46	1471.86	1525.87	1481.98	1717.44
1810046K07Rik	3.69566	7.17338	0	0	0	8.08221	4.55482	0	3.49251
1810048J11Rik	545.726	431.598	587.814	795.431	600.909	507.383	483.95	617.233	585.868
1810049H13Rik	151.522	157.814	75.0857	99.4288	110.512	164.338	113.301	134.585	157.163
1810055G02Rik	853.697	815.374	795.908	679.43	976.846	923.168	665.573	754.912	461.884
1810058I24Rik	1388.34	1709.66	1795.62	1551.34	1313.32	1454.8	1344.81	1430.93	1328.03
1810062G17Rik	45.5798	44.2359	40.0457	31.8682	54.2692	86.2102	74.5852	57.2372	57.6264
1810062O18Rik	17.2464	27.498	12.8718	26.7693	19.7343	20.6545	23.3435	30.939	20.0819
1810063B05Rik	408.986	345.518	316.075	356.924	235.825	276.591	191.872	303.202	295.99
1810063B07Rik	501.378	443.554	489.13	483.122	472.636	559.469	459.468	533.698	597.219
1810064F22Rik	184.783	124.339	177.345	151.693	172.675	110.457	120.133	235.137	204.312
1810074P20Rik	665.219	952.864	823.082	722.771	914.683	1112.65	955.943	686.846	684.532
2010001E11Rik	8.6232	26.3024	5.00571	5.09891	12.8273	5.38814	22.7741	21.6573	7.85815
2010001M06Rik	35.7247	5.97782	5.72082	11.4726	37.4951	70.9438	19.9273	4.64085	6.11189
2010001M09Rik	6.15943	0	1.4302	8.9231	1.97343	0	0	7.73475	3.49251
2010002M12Rik	92.3915	19.129	85.8122	42.066	27.628	34.1249	45.5482	47.9555	55.8802
2010002N04Rik	479.204	475.834	375.429	447.43	647.284	499.301	519.819	595.576	558.802
2010003K11Rik	7.39132	11.9556	0	3.82419	18.7476	3.59209	1.13871	18.5634	3.49251
2010003O02Rik	197.102	105.21	103.69	140.22	115.445	148.174	114.44	174.805	226.14
2010005H15Rik	34.4928	14.3468	15.0171	48.4397	10.8538	20.6545	5.12417	9.28171	48.022
2010009K17Rik	2.46377	0	0	3.82419	7.89371	5.38814	3.41612	0	0
2010010A06Rik	0	0	4.29061	0	1.97343	0	0	0	1.74625
2010011I20Rik	920.219	1535.1	1278.6	1426.42	737.075	848.632	1040.21	918.889	1124.59
2010012O05Rik	404.059	303.673	427.631	328.88	368.044	335.861	457.19	262.982	467.123
2010015L04Rik	146.594	59.7782	72.2253	117.275	99.6581	112.253	83.1255	193.369	93.4246
2010016I18Rik	149.058	133.903	142.305	128.748	163.794	140.99	117.287	249.059	106.522
2010106G01Rik	2207.54	3228.02	2831.8	2594.07	3855.09	3869.58	3682.57	2281.75	2641.21
2010107E04Rik	2816.09	2040.83	2555.77	2233.32	2212.21	2362.7	2267.16	2038.88	2924.1
2010107G12Rik	39.4204	10.7601	11.4416	28.044	11.8406	14.3684	30.745	35.5799	42.7832
2010107G23Rik	417.609	538.004	534.896	374.77	767.663	634.004	593.835	453.257	390.288
2010107H07Rik	128.116	161.401	144.451	135.121	193.396	166.134	177.638	176.352	164.148
2010109I03Rik	71.4494	109.992	100.114	90.5057	156.887	139.194	200.982	211.932	162.402
2010109K11Rik	578.987	222.375	732.264	302.111	361.137	232.588	351.86	563.09	378.937
2010110P09Rik	0	0	0	0	0	0	5.69353	0	0
2010111I01Rik	476.74	356.278	384.725	372.221	834.76	1032.73	807.912	479.555	494.19
2010204K13Rik	144.131	161.401	158.753	196.308	129.259	120.335	157.711	171.712	157.163
2010300C02Rik	777.32	981.558	799.484	622.068	563.413	629.514	666.143	957.563	794.546
2010305A19Rik	322.754	187.704	309.639	328.88	427.247	263.121	272.151	363.533	326.55
2010310C07Rik	6.15943	0	0.715102	1.27473	0	2.69407	0	0	0
2010317E24Rik	134.276	44.2359	13.5869	30.5935	43.4154	48.4933	39.2853	35.5799	84.6934
2010320M18Rik	229.131	191.29	163.043	170.814	188.462	240.67	211.23	253.7	221.774
2010321M09Rik	469.349	674.298	542.762	363.298	900.869	855.816	884.205	587.841	494.19
2200002D01Rik	1942.68	1899.75	2513.58	1425.15	1986.25	2566.55	2924.2	2038.88	2005.57
2200002J24Rik	4.92754	15.5423	0	0	0	18.8585	21.6354	0	0
2200002K05Rik	77.6088	221.179	321.796	188.66	183.529	135.602	227.172	123.756	104.775
2210009G21Rik	92.3915	231.939	82.2367	144.044	166.755	113.151	128.674	137.679	124.857
2210010C04Rik	6.15943	5.97782	3.57551	14.022	6.90699	10.7763	6.83223	3.0939	6.98502
2210010C17Rik	627.03	155.423	1124.86	1913.37	245.692	131.111	13.6645	600.217	1379.54
2210012G02Rik	204.493	209.224	269.593	294.462	238.785	191.279	265.888	371.268	318.692
2210013O21Rik	545.726	622.889	530.606	452.529	554.533	728.297	513.556	470.273	477.601
2210015D19Rik	319.059	249.873	348.255	249.847	340.416	400.518	190.733	247.512	274.162
2210016F16Rik	1319.35	1414.35	1318.65	985.365	1639.92	1520.35	1517.33	1073.58	1009.34
2210016L21Rik	337.537	395.732	451.944	418.111	419.353	479.544	397.978	482.649	471.489
2210018M11Rik	590.074	763.965	480.548	783.958	445.994	400.518	309.159	389.832	791.053
2210019I11Rik	2.46377	15.5423	0	0	0.986713	39.513	7.97094	20.1104	1.74625
2210020M01Rik	204.493	50.2137	53.6326	108.352	72.0301	91.5984	100.775	86.6293	150.178
2210021J22Rik	533.407	412.469	510.583	544.309	444.021	322.39	261.902	470.273	548.324
2210039B01Rik	89.9277	70.5383	65.7894	193.759	56.2427	112.253	118.995	213.479	135.335
2210403K04Rik	668.914	552.35	774.455	479.298	786.411	1366.79	1319.76	962.203	910.672
2210404J11Rik	298.116	365.842	232.408	316.133	415.406	429.255	510.709	341.876	287.259
2210404O07Rik	41.8841	117.165	118.707	105.802	14.8007	20.6545	67.1836	66.5189	56.7533
2210404O09Rik	156.45	241.504	218.821	196.308	175.635	279.285	253.931	179.446	199.073
2210407C18Rik	39.4204	45.4314	27.1739	34.4177	506.184	402.314	210.661	146.96	48.8951
2210408F21Rik	188.479	194.877	195.938	133.847	65.1231	139.194	112.732	180.993	157.163
2210408I21Rik	221.74	102.818	98.6841	173.363	144.06	195.769	113.301	167.071	181.611
2210409D07Rik	0	5.97782	4.29061	0	0	0	0	6.1878	0
2210411K11Rik	873.407	712.556	754.433	731.694	842.653	759.728	680.377	611.046	962.186
2210415F13Rik	34.4928	41.8447	20.0229	6.37364	99.6581	119.437	152.017	43.3146	13.0969
2210416O15Rik	1.23189	2.39113	0	0	1.97343	4.49012	0.569353	1.54695	2.61938
2210417A02Rik	14.7826	19.129	23.5984	16.5715	0.986713	11.6743	5.12417	24.7512	12.2238
2210417K05Rik	22.174	29.8891	10.7265	17.8462	11.8406	44.9012	20.4967	15.4695	14.8432
2210420H20Rik	8.6232	0	5.72082	1.27473	1.97343	4.49012	9.10964	6.1878	12.2238
2300002M23Rik	0	28.6935	7.15102	0	11.8406	102.375	25.0515	41.7677	2.61938
2300009A05Rik	209.421	149.445	218.106	145.319	292.067	378.966	266.457	196.463	169.387
2310001A20Rik	1908.19	1952.36	2191.79	1875.13	1914.22	1637.99	1669.34	1551.59	2519.85
2310001H17Rik	23.4058	32.2802	16.4473	6.37364	75.9769	43.1051	47.2563	7.73475	21.8282
2310001K24Rik	20.9421	23.9113	12.1567	10.1978	8.88042	16.1644	6.26288	12.3756	16.5894
2310002D06Rik	23.4058	13.1512	17.1624	8.9231	16.7741	8.08221	13.0951	4.64085	21.8282
2310002J15Rik	16.0145	7.17338	82.9518	16.5715	95.7112	323.288	62.6288	86.6293	46.2758
2310002L13Rik	39.4204	49.0181	160.898	24.2198	4.93357	90.7004	8.54029	40.2207	19.2088
2310003C23Rik	482.899	511.701	431.922	418.111	320.682	293.654	353.568	411.489	339.647
2310003F16Rik	1696.31	1848.34	2025.88	1657.15	1459.35	1533.82	1609.56	1681.54	1903.42
2310003H01Rik	567.9	361.06	402.602	495.869	465.729	420.275	444.664	447.069	491.571
2310003L22Rik	134.276	101.623	122.998	192.484	161.821	179.605	161.696	131.491	261.938
2310004I24Rik	458.262	425.621	527.03	543.034	419.353	291.858	363.816	522.869	446.168
2310004N24Rik	789.639	577.457	863.843	752.09	743.982	718.419	865.416	702.316	703.741
2310005A03Rik	9.85509	7.17338	7.86612	12.7473	10.8538	6.28616	9.679	10.8287	22.7013
2310007B03Rik	1585.44	1970.29	2512.87	1659.7	1275.82	1439.53	1204.18	1765.07	1954.06
2310007L24Rik	556.813	362.256	300.343	435.957	147.02	96.9865	70.0304	485.743	419.974
2310008H04Rik	484.131	462.683	416.904	523.913	983.753	957.293	799.371	538.339	475.854
2310008H09Rik	1242.97	1266.1	1147.02	1260.71	1082.42	1153.06	1091.45	1304.08	1188.33
2310009A05Rik	194.638	269.002	245.995	220.528	295.027	212.832	282.968	187.181	245.349
2310009B15Rik	216.812	225.962	200.944	169.539	210.17	298.144	140.061	111.38	175.499
2310010J17Rik	50.5073	32.2802	50.0571	34.4177	43.4154	55.6774	27.3289	26.2982	39.2907
2310010M20Rik	8.6232	3.58669	2.86041	8.9231	0.986713	3.59209	3.41612	6.1878	11.3507
2310011J03Rik	848.77	683.862	753.002	664.134	718.327	739.073	1000.92	654.36	762.24
2310014F07Rik	0	11.9556	0	3.82419	0	0	6.83223	18.5634	0.873127
2310014L17Rik	186.015	212.81	190.217	286.814	77.9504	109.559	145.754	153.148	288.132
2310015A10Rik	88.6958	155.423	201.659	141.495	163.794	242.466	312.575	122.209	114.38
2310015B20Rik	2.46377	2.39113	0	0	4.93357	0	0	0	0.873127
2310015D24Rik	9.85509	3.58669	1.4302	6.37364	5.92028	2.69407	9.679	23.2043	6.11189
2310016M24Rik	1537.39	1447.83	1671.91	1686.47	1956.65	2089.7	1644.86	1341.21	1981.13
2310021P13Rik	856.161	1133.39	687.928	789.057	791.344	829.774	1100.56	1242.2	911.545
2310022A10Rik	157.681	205.637	120.852	275.341	218.064	160.746	283.538	154.695	226.14
2310022B05Rik	1054.49	1966.7	1263.59	1663.52	914.683	1125.22	1051.03	1375.24	1069.58
2310028H24Rik	92.3915	83.6895	96.5388	81.5826	98.6713	118.539	115.579	129.944	123.984
2310030G06Rik	688.624	841.677	738.7	601.672	573.281	678.906	638.814	535.245	661.831
2310030N02Rik	261.16	130.316	204.519	243.473	210.17	101.477	165.682	157.789	187.722
2310033E01Rik	12.3189	4.78225	7.86612	3.82419	2.96014	35.0229	0	4.64085	18.3357
2310033P09Rik	287.029	249.873	243.135	256.22	276.28	238.874	199.843	281.545	247.968
2310034G01Rik	252.537	92.0584	70.08	107.077	151.954	170.624	107.608	140.773	213.916
2310034O05Rik	12.3189	3.58669	4.29061	5.09891	5.92028	7.18419	9.679	20.1104	13.0969
2310035C23Rik	741.596	775.921	772.31	871.914	1043.94	775.892	926.337	841.541	860.03
2310035K24Rik	449.638	656.364	561.355	429.584	396.659	642.087	696.888	524.416	479.347
2310036O22Rik	1789.93	2020.5	1904.32	1578.11	1681.36	1913.69	1577.11	1599.55	1653.7
2310037I24Rik	1493.05	2245.27	2353.4	2214.2	1969.48	1714.33	1840.15	1952.25	1597.82
2310039H08Rik	420.073	443.554	377.574	424.485	289.107	596.287	417.905	457.897	517.765
2310039L15Rik	251.305	132.708	102.26	257.495	174.648	189.483	174.791	292.374	252.334
2310040G24Rik	101.015	39.4536	91.533	89.231	43.4154	27.8387	23.3435	30.939	85.5665
2310042D19Rik	48.0436	94.4495	99.3992	104.528	78.9371	64.6577	30.745	106.74	107.395
2310043J07Rik	72.6813	180.53	87.2424	48.4397	103.605	324.186	52.3805	286.186	67.2308
2310043L19Rik	0	0	5.72082	0	4.93357	0	5.12417	3.0939	8.73127
2310043O21Rik	0	2.39113	2.14531	6.37364	4.93357	0.898023	2.84676	0	3.49251
2310044G17Rik	850.002	768.747	681.492	829.848	1004.47	829.774	889.329	586.294	700.248
2310044H10Rik	1898.34	2120.93	1639.01	1626.55	1888.57	1840.95	1786.63	1658.33	1779.43
2310045N01Rik	639.349	639.627	612.842	458.902	541.706	462.482	392.853	544.527	567.533
2310046A06Rik	0	0	7.15102	0	0	0	0	0	0
2310046K01Rik	241.45	671.907	844.535	529.012	561.44	834.264	1126.75	504.306	533.481
2310046O06Rik	322.754	212.81	449.799	359.473	435.141	390.64	242.544	337.235	247.968
2310047B19Rik	178.624	248.677	160.183	146.594	235.825	209.239	238.559	133.038	148.432
2310047M10Rik	99.7828	142.272	103.69	91.7805	91.7644	118.539	124.688	137.679	130.096
2310057M21Rik	232.826	144.663	242.42	234.55	307.855	305.328	291.509	244.418	147.559
2310061C15Rik	194.638	306.064	271.739	210.33	180.569	198.463	150.309	232.043	322.184
2310061I04Rik	305.508	254.655	296.767	396.441	260.492	327.779	263.041	354.252	384.176
2310061J03Rik	101.015	84.885	79.3763	58.6375	100.645	123.927	64.9062	92.8171	100.41
2310067B10Rik	1325.51	1598.47	931.063	1380.53	932.444	770.504	1065.83	976.126	1205.79
2310068J16Rik	11.087	25.1068	5.00571	21.6704	7.89371	23.3486	12.5258	9.28171	8.73127
2310069B03Rik	7.39132	27.498	6.43592	10.1978	3.94685	12.5723	1.70806	21.6573	2.61938
2310079F23Rik	139.203	114.774	118.707	188.66	149.98	112.253	175.93	241.324	157.163
2400001E08Rik	1404.35	1808.89	1529.6	1584.49	1686.29	1788.86	1845.27	1223.64	1427.56
2400003C14Rik	2936.82	3628.54	3523.31	3561.59	2871.34	3633.4	3261.25	3669.37	2876.95
2400009B08Rik	50.5073	52.6048	6.43592	50.9891	78.9371	29.6348	79.14	41.7677	27.9401
2410001C21Rik	1760.37	1908.12	2101.68	1857.28	1806.67	1964.87	2087.82	1720.21	1914.77
2410002F23Rik	845.074	1242.19	995.422	1226.29	944.285	1098.28	1096	1695.46	823.359
2410002I01Rik	288.261	227.157	298.198	339.078	409.486	248.752	281.83	343.423	223.521
2410002O22Rik	1173.99	1214.69	830.233	1226.29	1223.52	1262.62	1278.2	935.905	1069.58
2410003K15Rik	492.754	639.627	577.802	420.66	346.336	438.235	359.262	536.792	490.698
2410003L11Rik	2.46377	0	0	0	1.97343	0.898023	7.40159	0	18.3357
2410004A20Rik	14.7826	28.6935	24.3135	16.5715	4.93357	8.08221	4.55482	6.1878	30.5595
2410004B18Rik	242.682	237.917	273.884	299.561	340.416	211.933	206.675	273.81	353.617
2410004I01Rik	0	0	2.86041	5.09891	0	0	0	0	12.2238
2410004N09Rik	94.8552	124.339	112.271	90.5057	74.9902	103.273	68.8917	119.115	117.872
2410004P03Rik	606.088	151.837	197.368	494.595	316.735	169.726	124.119	413.036	382.43
2410006H16Rik	751.451	778.312	870.994	763.562	833.773	718.419	866.555	883.309	764.86
2410007B07Rik	32.029	10.7601	12.8718	21.6704	12.8273	15.2664	13.6645	21.6573	21.8282
2410015M20Rik	1352.61	1371.31	1428.06	1199.52	1012.37	1171.92	984.411	1225.19	1141.18
2410016O06Rik	284.566	176.943	274.599	280.44	177.608	201.157	208.952	241.324	322.184
2410017I17Rik	4.92754	1.19556	1.4302	14.022	5.92028	5.38814	4.55482	3.0939	8.73127
2410017P09Rik	287.029	225.962	301.773	242.198	241.745	236.18	456.621	201.104	309.087
2410018L13Rik	121.957	114.774	181.636	152.967	128.273	140.99	148.601	150.054	148.432
2410018M08Rik	123.189	141.077	93.6784	149.143	102.618	79.9241	74.5852	95.911	96.044
2410021H03Rik	4.92754	5.97782	5.00571	3.82419	3.94685	6.28616	3.98547	15.4695	4.36564
2410022L05Rik	443.479	249.873	384.01	252.396	337.456	317.002	213.507	222.761	386.795
2410042D21Rik	683.697	549.959	984.695	773.76	814.039	1059.67	796.524	615.686	660.084
2410057H14Rik	3.69566	3.58669	9.29632	5.09891	2.96014	23.3486	13.0951	3.0939	1.74625
2410066E13Rik	43.116	66.9516	45.7665	31.8682	11.8406	72.7399	37.5773	29.3921	20.0819
2410075B13Rik	123.189	246.286	193.078	150.418	73.0168	169.726	81.9868	163.977	185.976
2410076I21Rik	2.46377	17.9335	0	2.54946	0.986713	24.2466	4.55482	3.0939	15.7163
2410088K16Rik	4.92754	4.78225	7.15102	7.64837	5.92028	8.98023	14.8032	9.28171	10.4775
2410089E03Rik	588.842	329.976	512.013	657.76	547.626	654.659	581.879	676.018	649.607
2410091C18Rik	665.219	612.129	813.071	776.31	814.039	768.708	662.727	524.416	782.322
2410114N07Rik	20.9421	8.36895	8.58122	21.6704	11.8406	12.5723	17.0806	18.5634	13.97
2410124H12Rik	2.46377	33.4758	5.72082	1.27473	0	0	0	4.64085	14.8432
2410127L17Rik	1457.32	846.459	1351.54	1175.3	1178.14	1206.05	1101.13	997.783	1333.27
2410131K14Rik	290.725	283.349	427.631	392.616	365.084	366.394	379.758	346.517	295.99
2410137M14Rik	2.46377	13.1512	0	2.54946	0	0	1.13871	0	0.873127
2500003M10Rik	1681.52	1868.67	1714.1	1876.4	2493.42	1788.86	2334.35	1763.52	1741.89
2500004C02Rik	354.783	143.468	228.118	322.506	129.259	128.417	227.172	357.346	237.491
2510002D24Rik	817.972	503.332	615.703	509.891	700.567	598.084	571.63	674.471	698.502
2510003E04Rik	958.407	975.58	694.364	917.805	729.181	664.537	822.145	733.255	735.173
2510006D16Rik	1275	931.344	1227.83	1269.63	1245.23	1579.62	1326.02	1201.98	1416.21
2510009E07Rik	1334.13	1837.58	1784.89	1400.93	884.095	737.277	1114.79	1123.09	1298.34
2510012J08Rik	575.291	511.701	589.959	743.167	681.819	566.653	588.141	518.229	529.115
2510039O18Rik	1347.68	961.233	1412.33	1555.17	1690.24	1635.3	1425.09	1421.65	1390.89
2510049J12Rik	156.45	285.74	162.328	118.55	163.794	242.466	126.396	163.977	120.492
2600006L11Rik	8.6232	4.78225	0.715102	6.37364	1.97343	8.98023	10.8177	18.5634	11.3507
2610001J05Rik	1985.8	2195.05	2751.71	2035.74	2462.84	2460.58	2530.2	1902.75	1609.17
2610002D18Rik	11.087	10.7601	3.57551	16.5715	39.4685	31.4308	10.2483	20.1104	18.3357
2610002I17Rik	125.652	245.091	55.7779	122.374	231.878	144.582	139.491	184.087	120.492
2610002J02Rik	691.088	722.12	750.857	845.145	901.856	921.372	814.744	657.454	770.098
2610002M06Rik	631.958	591.804	707.236	653.936	580.188	621.432	842.642	473.367	448.787
2610005L07Rik	1469.64	1384.46	1087.67	1643.13	1092.29	1240.17	961.067	2448.82	1108.87
2610008E11Rik	257.464	607.346	316.075	270.242	253.585	411.295	286.384	434.693	337.027
2610015P09Rik	304.276	197.268	113.701	271.517	226.944	176.911	145.754	306.296	330.915
2610016A17Rik	1.23189	0	0	2.54946	0	0	7.97094	0	0
2610018G03Rik	102.247	106.405	102.975	126.198	97.6846	52.9834	58.6433	64.9719	108.268
2610019E17Rik	38.1885	26.3024	20.738	29.3188	17.7608	48.4933	25.0515	44.8616	28.8132
2610019F03Rik	110.87	83.6895	110.126	146.594	148.007	245.16	53.5192	88.1762	81.2008
2610020C07Rik	18.4783	11.9556	31.4645	24.2198	34.535	39.513	43.2708	71.1597	13.97
2610020H08Rik	102.247	109.992	30.0343	93.0552	90.7776	49.3913	68.3223	131.491	62.8652
2610021K21Rik	75.1451	37.0625	8.58122	17.8462	22.6944	30.5328	18.7886	38.6738	61.1189
2610027L16Rik	1017.54	1329.47	1014.01	1241.59	1064.66	855.816	958.221	1152.48	1003.22
2610028E06Rik	0	5.97782	1.4302	2.54946	1.97343	0	6.83223	3.0939	5.23876
2610028H24Rik	1197.39	374.211	805.92	808.178	586.108	478.646	565.937	940.546	1287.86
2610029G23Rik	752.682	557.133	552.774	656.485	962.046	788.464	858.015	522.869	818.12
2610029I01Rik	112.102	127.925	232.408	145.319	225.957	133.805	178.207	202.651	208.677
2610034B18Rik	712.03	865.588	534.181	602.947	824.892	660.047	574.477	577.013	601.585
2610035D17Rik	181.087	236.722	231.693	175.913	189.449	127.519	58.074	247.512	107.395
2610037D02Rik	56.6668	23.9113	27.1739	45.8902	24.6678	36.819	40.9934	92.8171	47.1489
2610039C10Rik	417.609	245.091	345.394	260.045	212.143	243.364	196.427	261.435	330.042
2610044O15Rik	569.131	528.439	391.876	407.913	391.725	445.42	468.577	539.886	511.653
2610100L16Rik	6.15943	2.39113	1.4302	1.27473	3.94685	3.59209	3.98547	4.64085	1.74625
2610101N10Rik	1102.54	1337.84	1007.58	1260.71	1569.86	1296.75	1333.99	1137.01	1029.42
2610109H07Rik	8.6232	0	2.14531	12.7473	0	8.98023	2.84676	4.64085	15.7163
2610203C20Rik	20.9421	124.339	117.992	54.8133	68.0832	100.579	11.3871	125.303	30.5595
2610203C22Rik	2.46377	0	2.14531	3.82419	0	0	6.26288	4.64085	6.98502
2610204G22Rik	3.69566	17.9335	3.57551	14.022	0.986713	0.898023	7.40159	0	13.0969
2610206C17Rik	50.5073	50.2137	31.4645	61.187	34.535	47.5952	42.7015	47.9555	37.5445
2610301B20Rik	543.262	316.824	524.17	558.331	763.716	730.093	641.661	420.771	693.263
2610301G19Rik	1289.78	1588.9	1403.75	1522.03	1875.74	1313.81	1336.84	1520.65	1373.43
2610305D13Rik	4.92754	0	1.4302	1.27473	0	5.38814	129.243	7.73475	0
2610306M01Rik	189.71	98.0362	120.852	95.6046	74.9902	115.845	75.1546	131.491	134.462
2610307P16Rik	166.305	169.77	85.8122	121.099	16.7741	18.8585	44.4095	112.927	89.9321
2610316D01Rik	0	0	0	0	9.86713	0	0	0	0
2610318N02Rik	32.029	13.1512	0	45.8902	0	2.69407	14.8032	1.54695	16.5894
2610507B11Rik	3590.95	4843.23	4907.74	4306.03	5092.43	4803.53	5021.69	4478.42	3790.25
2610507I01Rik	98.5509	27.498	61.4988	94.3299	57.2294	65.5557	89.9577	168.618	101.283
2610524H06Rik	439.783	438.772	466.246	332.704	490.397	510.077	482.242	518.229	543.085
2610528A11Rik	2.46377	0	0	1.27473	4.93357	0	0	15.4695	9.6044
2610528E23Rik	204.493	185.312	258.867	212.88	165.768	141.888	200.982	180.993	207.804
2610528J11Rik	502.61	644.409	609.267	648.837	597.948	488.525	509.571	508.947	543.085
2700007P21Rik	306.74	431.598	442.648	400.265	339.429	441.827	366.663	324.86	344.885
2700023E23Rik	117.029	22.7157	68.6498	159.341	116.432	91.5984	88.2497	122.209	138.827
2700029M09Rik	363.406	461.488	424.771	411.737	313.775	516.363	318.838	443.975	502.921
2700038G22Rik	187.247	111.187	140.16	286.814	144.06	103.273	126.966	211.932	153.67
2700046G09Rik	29.5653	14.3468	37.9004	16.5715	56.2427	57.4735	19.358	35.5799	18.3357
2700049A03Rik	340.001	304.869	363.272	424.485	217.077	343.943	243.683	276.904	510.78
2700050L05Rik	833.987	543.981	872.424	1024.88	844.627	345.739	641.091	646.625	803.277
2700054A10Rik	19.7102	58.5826	18.5926	43.3408	24.6678	49.3913	87.111	37.1268	37.5445
2700060E02Rik	1834.28	2068.33	1599.68	1663.52	1902.38	1822.09	1667.06	1727.94	1892.94
2700062C07Rik	348.624	180.53	345.394	226.902	321.669	268.509	286.384	267.623	391.161
2700069I18Rik	23.4058	2.39113	9.29632	17.8462	6.90699	10.7763	20.4967	7.73475	12.2238
2700070H01Rik	43.116	27.498	13.5869	36.9671	32.5615	25.1447	28.4676	38.6738	28.8132
2700078E11Rik	756.378	594.195	858.122	729.145	606.829	651.965	604.083	683.752	545.705
2700081L22Rik	4.92754	8.36895	0	0	0	0.898023	0	0	1.74625
2700081O15Rik	43.116	41.8447	50.7722	30.5935	67.0965	47.5952	74.0159	78.8945	61.1189
2700089E24Rik	1617.47	1664.22	1992.99	1567.92	1263.98	1353.32	1356.77	1604.19	1115.86
2700089I24Rik	11.087	11.9556	0	11.4726	5.92028	8.98023	15.3725	13.9226	21.8282
2700090O03Rik	0	0	0	0	0	0.898023	1.70806	7.73475	0.873127
2700094K13Rik	1350.15	915.802	867.419	894.86	915.67	936.638	832.963	863.199	1226.74
2700097O09Rik	376.957	296.5	259.582	396.441	314.762	290.062	240.267	314.031	318.692
2700099C18Rik	72.6813	20.3246	4.29061	48.4397	30.5881	13.4703	37.5773	35.5799	85.5665
2810001G20Rik	131.812	93.254	84.382	62.4617	77.9504	149.97	87.6803	63.425	79.4546
2810002D19Rik	77.6088	78.9072	57.9233	86.6815	59.2028	42.2071	37.5773	61.878	38.4176
2810002N01Rik	654.132	419.643	573.512	601.672	419.353	618.738	618.886	538.339	753.509
2810004N23Rik	811.813	934.931	660.754	736.793	622.616	532.528	519.25	739.443	681.913
2810006K23Rik	337.537	240.308	249.571	286.814	300.948	225.404	196.996	391.379	193.834
2810008D09Rik	186.015	208.028	280.32	257.495	278.253	341.249	240.267	361.987	209.551
2810008M24Rik	1495.51	1293.6	1823.51	1571.74	1330.09	1230.29	1367.02	1279.33	1569.01
2810013P06Rik	375.725	361.06	204.519	293.188	350.283	299.94	166.82	298.562	300.356
2810021B07Rik	735.436	651.582	633.58	838.771	686.753	599.88	494.768	816.79	671.435
2810021J22Rik	234.058	301.282	243.135	262.594	231.878	368.19	267.026	269.169	187.722
2810025M15Rik	52.9711	137.49	32.1796	8.9231	238.785	361.005	219.201	97.4579	77.7083
2810029C07Rik	49.2754	102.818	24.3135	31.8682	0	5.38814	21.6354	38.6738	56.7533
2810030E01Rik	85.0002	37.0625	88.6726	99.4288	29.6014	52.0854	2.27741	15.4695	72.4696
2810032G03Rik	0	10.7601	17.8775	0	0	12.5723	48.395	0	1.74625
2810046L04Rik	356.015	261.828	276.744	294.462	154.914	248.752	321.684	419.224	342.266
2810047C21Rik1	407.754	70.5383	146.596	508.617	75.9769	43.1051	16.5112	89.7232	246.222
2810049E08Rik	18.4783	15.5423	12.8718	16.5715	11.8406	20.6545	15.3725	21.6573	24.4476
2810055F11Rik	38.1885	22.7157	39.3306	22.9451	28.6147	23.3486	6.26288	27.8451	55.8802
2810055G20Rik	107.174	65.756	41.4759	87.9563	41.442	43.1051	19.9273	105.193	74.2158
2810403A07Rik	1709.86	1873.45	2163.18	2318.73	1612.29	1461.08	1746.77	2657.66	1797.77
2810403D21Rik	38.1885	16.7379	26.4588	22.9451	30.5881	44.0031	31.8838	23.2043	34.052
2810405K02Rik	257.464	181.726	251.716	152.967	144.06	154.46	158.849	131.491	203.439
2810407C02Rik	932.538	1064.05	997.567	820.925	955.139	931.25	867.694	1013.25	1188.33
2810408A11Rik	101.015	216.397	128.718	101.978	134.193	202.055	205.536	105.193	53.2608
2810408I11Rik	27.1015	26.3024	5.00571	14.022	16.7741	20.6545	16.5112	17.0165	6.98502
2810408M09Rik	506.305	356.278	551.344	553.232	355.217	380.762	259.625	536.792	550.07
2810410L24Rik	43.116	22.7157	35.04	26.7693	19.7343	17.9605	24.4822	27.8451	9.6044
2810417H13Rik	193.406	53.8004	72.2253	186.11	200.303	123.029	95.0819	129.944	200.819
2810422J05Rik	656.595	789.072	868.134	624.617	699.58	922.27	623.441	816.79	903.687
2810422O20Rik	97.319	72.9294	96.5388	95.6046	107.552	142.786	104.761	133.038	127.477
2810428I15Rik	894.349	834.503	873.855	701.101	673.925	825.283	658.172	846.182	873.127
2810429I04Rik	1.23189	2.39113	0	2.54946	0.986713	0.898023	1.13871	1.54695	0.873127
2810432D09Rik	296.885	157.814	248.855	365.847	410.473	385.252	265.318	264.529	316.072
2810432L12Rik	1129.64	559.524	600.686	610.595	1764.24	1702.65	1361.89	654.36	1139.43
2810433D01Rik	27.1015	39.4536	11.4416	33.1429	32.5615	26.9407	19.9273	24.7512	28.8132
2810442I21Rik	8.6232	0	5.72082	0	0.986713	0.898023	1.13871	13.9226	2.61938
2810442N19Rik	0	0	1.4302	17.8462	0	0.898023	0	1.54695	7.85815
2810453I06Rik	114.565	182.921	185.211	175.913	237.798	207.443	152.587	173.259	236.618
2810454H06Rik	87.4639	38.258	22.8833	52.2639	46.3755	55.6774	19.9273	27.8451	56.7533
2810459M11Rik	251.305	253.46	267.448	402.814	233.851	138.296	118.995	329.501	119.618
2810474O19Rik	3955.59	3391.81	3031.32	3524.62	5357.85	6331.06	4998.35	3098.54	3594.67
2900002K06Rik	6.15943	0	5.00571	5.09891	4.93357	8.98023	9.10964	20.1104	9.6044
2900005J15Rik	234.058	141.077	244.565	127.473	232.864	279.285	191.303	264.529	117.872
2900006K08Rik	68.9856	7.17338	22.8833	57.3628	69.0699	44.9012	46.6869	40.2207	52.3876
2900008C10Rik	7.39132	1.19556	1.4302	3.82419	0	7.18419	11.9564	6.1878	6.11189
2900009J06Rik	24.6377	3.58669	7.15102	15.2967	20.721	6.28616	29.6063	18.5634	0.873127
2900010M23Rik	1209.71	895.477	1015.44	809.453	994.607	1020.15	856.876	1065.85	924.642
2900011O08Rik	0	0	5.72082	0	1.97343	0.898023	0	0	0
2900026A02Rik	758.842	899.064	943.219	736.793	727.208	735.481	919.505	1417.01	580.63
2900041M22Rik	4.92754	0	0	2.54946	6.90699	0	6.26288	0	0.873127
2900053A13Rik	597.465	474.639	501.286	428.309	488.423	528.038	455.482	507.4	454.026
2900056M20Rik	120.725	247.482	181.636	267.693	215.104	195.769	99.0674	174.805	165.021
2900060B14Rik	128.116	60.9737	64.3592	99.4288	62.1629	33.2269	60.3514	86.6293	132.715
2900064A13Rik	1547.25	2070.72	2055.2	1404.75	2005.99	2107.66	2057.64	1602.64	2010.81
2900076A07Rik	94.8552	112.383	95.1086	98.1541	155.901	76.332	37.0079	99.0049	101.283
2900079G21Rik	6.15943	1.19556	0.715102	0	0	0	3.41612	0	3.49251
2900092E17Rik	492.754	436.381	459.811	430.858	512.104	375.374	300.618	464.085	482.839
2900093L17Rik	3.69566	0	0	7.64837	0.986713	8.98023	0	3.0939	4.36564
2900097C17Rik	5963.56	9554.95	8639.86	7765.65	7890.75	9582.81	8134.34	7974.53	6837.46
3000002C10Rik	23.4058	69.3427	45.7665	56.0881	6.90699	13.4703	55.2272	34.0329	51.5145
3010026O09Rik	152.754	57.3871	95.8237	131.297	103.605	88.9043	41.5628	148.507	130.969
3110001D03Rik	469.349	290.522	309.639	274.067	415.406	410.397	323.962	290.827	374.572
3110001I22Rik	72.6813	76.5161	100.829	86.6815	103.605	84.4142	57.5046	89.7232	156.29
3110002H16Rik	1032.32	747.227	1166.33	1217.37	591.041	832.468	737.312	864.746	817.247
3110003A17Rik	670.146	744.836	795.193	634.815	543.679	565.755	801.649	693.034	897.575
3110007F17Rik	16.0145	1.19556	2.14531	1.27473	1.97343	11.6743	0	0	10.4775
3110009E18Rik	78.8407	58.5826	60.7837	42.066	58.2161	61.9636	37.0079	57.2372	60.2458
3110009F21Rik	0	0	55.7779	33.1429	0.986713	0.898023	7.40159	24.7512	6.98502
3110015C05Rik	34.4928	5.97782	17.8775	14.022	1.97343	6.28616	11.3871	47.9555	23.5744
3110021A11Rik	13.5507	21.5201	17.1624	15.2967	18.7476	3.59209	34.7305	18.5634	17.4625
3110021N24Rik	73.9132	40.6492	87.2424	77.7584	108.538	97.8845	108.177	91.2701	96.9171
3110035E14Rik	0	0	0	0	0	0	0	0	28.8132
3110040N11Rik	266.087	178.139	324.656	235.825	274.306	242.466	190.733	256.794	287.259
3110043O21Rik	461.957	271.393	406.178	443.606	497.304	512.771	590.988	546.074	440.929
3110045C21Rik	46.8117	3.58669	0	0	2.96014	1.79605	0	0	0
3110052M02Rik	188.479	157.814	147.311	158.066	242.732	307.124	137.214	151.601	149.305
3110056K07Rik	158.913	38.258	96.5388	142.77	74.9902	126.621	80.2787	109.834	136.208
3110056O03Rik	893.118	626.475	617.848	651.386	979.806	844.142	563.659	727.067	890.59
3110057O12Rik	153.986	72.9294	92.9632	109.627	82.8839	45.7992	37.0079	100.552	131.842
3110062M04Rik	282.102	191.29	290.331	295.737	188.462	227.2	196.427	230.496	199.946
3110070M22Rik	7.39132	4.78225	7.15102	22.9451	16.7741	0	18.2193	6.1878	10.4775
3110082I17Rik	380.653	295.304	432.637	497.144	449.941	416.683	442.387	385.191	596.346
3110099E03Rik	8.6232	4.78225	6.43592	2.54946	20.721	14.3684	9.10964	13.9226	14.8432
3200001D21Rik	18.4783	21.5201	12.8718	28.044	25.6546	37.717	22.7741	35.5799	55.007
3200002M19Rik	206.957	223.57	211.67	203.957	258.519	262.223	281.26	245.965	239.237
3230401D17Rik	1724.64	1826.82	2034.46	1811.39	1766.22	1955.89	2038.28	1647.5	1727.05
3300002I08Rik	39.4204	26.3024	17.1624	20.3957	37.4951	28.7367	42.1321	13.9226	48.8951
3300005D01Rik	8.6232	0	12.1567	3.82419	0	0	2.27741	1.54695	0
3632451O06Rik	0	19.129	0	0	0	0	0	0	0
3632454L22Rik	30.7972	8.36895	4.29061	20.3957	7.89371	14.3684	27.3289	29.3921	22.7013
3830403N18Rik	1.23189	0	2.86041	5.09891	1.97343	0.898023	1.70806	0	0
3830406C13Rik	510.001	675.493	642.162	481.847	407.513	537.916	500.461	496.571	521.257
3830408C21Rik	9.85509	49.0181	17.1624	47.165	27.628	33.2269	30.745	4.64085	41.037
3830431G21Rik	730.509	591.804	1088.39	912.706	294.041	244.262	573.908	923.53	591.98
3930402G23Rik	27.1015	29.8891	29.3192	6.37364	7.89371	4.49012	0	0	13.0969
4430402I18Rik	33.2609	37.0625	25.0286	34.4177	8.88042	43.1051	18.7886	35.5799	45.4026
4632411B12Rik	933.77	1059.27	1193.51	1105.19	1136.69	1374.87	961.067	1399.99	1064.34
4632415K11Rik	277.174	647.996	376.144	326.331	281.213	473.258	460.606	272.263	274.162
4632415L05Rik	558.044	563.111	469.107	434.682	424.287	489.423	391.145	388.285	532.608
4632427E13Rik	144.131	72.9294	144.451	163.165	102.618	102.375	125.258	193.369	141.447
4632428C04Rik	70.2175	81.2983	68.6498	82.8574	31.5748	60.1676	39.2853	40.2207	41.037
4632428N05Rik	3.69566	17.9335	37.9004	6.37364	41.442	81.7201	334.779	0	61.992
4632434I11Rik	67.7537	31.0847	18.5926	72.6595	55.256	52.0854	61.4901	21.6573	25.3207
4732415M23Rik	20.9421	15.5423	22.8833	8.9231	17.7608	11.6743	4.55482	20.1104	27.0669
4732416N19Rik	1.23189	1.19556	2.14531	1.27473	0	0	4.55482	0	0
4732418C07Rik	1146.89	1101.11	1277.17	1147.26	1230.43	1250.05	1177.42	1041.1	1152.53
4732456N10Rik	0	0	0	0	44.4021	0	0	0	0
4732471D19Rik	293.189	144.663	158.753	203.957	227.931	242.466	126.966	267.623	132.715
4732471J01Rik	14.7826	43.0403	18.5926	39.5166	14.8007	19.7565	27.3289	52.5963	30.5595
4732490B19Rik	13.5507	8.36895	22.1682	10.1978	0	5.38814	1.13871	58.7841	18.3357
4732491K20Rik	14.7826	64.5604	33.6098	14.022	48.349	44.9012	38.1466	35.5799	32.3057
4831426I19Rik	30.7972	15.5423	33.6098	11.4726	15.7874	30.5328	33.0225	10.8287	9.6044
4831440E17Rik	29.5653	59.7782	49.342	72.6595	29.6014	39.513	37.5773	91.2701	38.4176
4832428D23Rik	0	3.58669	0	7.64837	4.93357	6.28616	5.12417	0	12.2238
4833403I15Rik	3.69566	57.3871	7.86612	1.27473	0	13.4703	0	7.73475	13.97
4833412C05Rik	0	2.39113	0	0	0	5.38814	1.70806	4.64085	0
4833417C18Rik	24.6377	32.2802	35.04	52.2639	71.0434	45.7992	55.2272	23.2043	34.9251
4833418N02Rik	114.565	26.3024	62.929	40.7913	74.0035	61.9636	69.461	109.834	47.1489
4833419F23Rik	1.23189	15.5423	0	10.1978	9.86713	24.2466	24.4822	13.9226	6.11189
4833420G17Rik	935.002	558.328	388.3	1040.18	826.866	508.281	749.838	710.05	631.271
4833422C13Rik	20.9421	10.7601	3.57551	24.2198	8.88042	9.87826	9.679	10.8287	18.3357
4833423E24Rik	0	0	0	0	11.8406	28.7367	12.5258	0	0
4833427F10Rik	57.8987	11.9556	13.5869	43.3408	42.4287	24.2466	19.9273	51.0494	23.5744
4833427G06Rik	49.2754	17.9335	35.7551	35.6924	57.2294	45.7992	17.6499	69.6128	61.1189
4833439L19Rik	3588.48	4046.98	3604.83	3550.12	3524.54	3694.47	3739.51	2880.42	3012.29
4833442J19Rik	611.016	533.221	618.563	494.595	921.59	1573.34	716.815	426.958	542.212
4921504E06Rik	0	7.17338	0	0	0	1.79605	13.0951	0	0
4921506M07Rik	71.4494	82.4939	34.3249	56.0881	44.4021	86.2102	22.2048	72.7067	41.9101
4921507L20Rik	11.087	3.58669	6.43592	8.9231	3.94685	5.38814	4.55482	4.64085	6.98502
4921507P07Rik	130.58	215.201	107.98	71.3848	39.4685	35.0229	17.6499	97.4579	92.5515
4921508A21Rik	102.247	90.8628	61.4988	110.901	87.8175	111.355	125.827	114.474	118.745
4921509C19Rik	6.15943	0	0	2.54946	0	0	1.13871	3.0939	6.11189
4921511C10Rik	18.4783	8.36895	1.4302	19.1209	18.7476	11.6743	9.10964	4.64085	8.73127
4921513D23Rik	426.233	245.091	267.448	350.55	281.213	308.92	260.764	318.672	275.035
4921513I03Rik	23.4058	10.7601	13.5869	35.6924	30.5881	14.3684	27.3289	23.2043	29.6863
4921515E04Rik	92.3915	50.2137	58.6384	72.6595	73.0168	64.6577	111.024	122.209	109.141
4921515J06Rik	20.9421	7.17338	21.4531	5.09891	2.96014	0	11.9564	20.1104	0
4921517D22Rik	6.15943	0	3.57551	1.27473	0	3.59209	2.84676	0	3.49251
4921517L17Rik	22.174	34.6713	28.6041	43.3408	6.90699	36.819	26.1902	26.2982	22.7013
4921523A10Rik	12.3189	20.3246	19.3078	12.7473	7.89371	16.1644	17.6499	34.0329	24.4476
4921524J17Rik	347.392	292.913	431.206	327.605	282.2	371.782	251.654	318.672	248.841
4921525B02Rik	8.6232	0	0.715102	7.64837	4.93357	0	9.679	7.73475	6.11189
4921530D09Rik	0	5.97782	2.86041	1.27473	0.986713	2.69407	0.569353	1.54695	3.49251
4921530L18Rik	18.4783	16.7379	30.0343	15.2967	13.814	38.615	13.0951	23.2043	33.1788
4921531C22Rik	155.218	112.383	170.909	175.913	90.7776	163.44	141.769	153.148	167.64
4921536K21Rik	25.8696	2.39113	14.302	16.5715	15.7874	11.6743	5.12417	34.0329	12.2238
4922501C03Rik	342.464	333.562	140.16	220.528	393.699	383.456	293.217	318.672	179.864
4922501L14Rik	125.652	32.2802	22.1682	49.7144	41.442	76.332	38.1466	74.2536	34.052
4922505G16Rik	4.92754	1.19556	1.4302	11.4726	9.86713	0.898023	3.41612	1.54695	2.61938
4930402F11Rik	0	1.19556	1.4302	1.27473	0	2.69407	1.70806	1.54695	2.61938
4930402H24Rik	857.393	1004.27	537.042	671.782	632.483	449.91	513.556	609.499	565.787
4930404I05Rik	3.69566	21.5201	0	1.27473	7.89371	3.59209	2.84676	13.9226	0
4930404N11Rik	75.1451	54.9959	54.3477	34.4177	72.0301	67.3517	85.4029	61.878	49.7683
4930405A21Rik	6.15943	2.39113	0.715102	1.27473	6.90699	3.59209	1.13871	9.28171	4.36564
4930405P13Rik	267.319	107.601	120.852	286.814	138.14	200.259	261.902	389.832	278.528
4930412B13Rik	1.23189	0	2.86041	1.27473	0	0	0	6.1878	0
4930412C18Rik	20.9421	0	6.43592	0	18.7476	2.69407	6.26288	0	41.037
4930413F20Rik	23.4058	26.3024	20.738	20.3957	30.5881	52.9834	44.9789	38.6738	37.5445
4930413G21Rik	62.8262	80.1028	94.3935	59.9122	50.3224	88.9043	95.6513	88.1762	71.5964
4930414L22Rik	337.537	169.77	307.494	330.155	215.104	230.792	231.157	300.108	292.498
4930415O20Rik	2.46377	0	0	1.27473	3.94685	3.59209	0	0	0
4930417G10Rik	0	0	22.8833	1.27473	0	0	0	10.8287	0
4930417O22Rik	8.6232	0	5.00571	2.54946	1.97343	11.6743	7.40159	4.64085	6.98502
4930420K17Rik	2516.74	2786.86	2966.96	1754.03	3178.2	3081.12	1950.03	1938.33	3331.85
4930422G04Rik	88.6958	54.9959	27.889	39.5166	77.9504	39.513	48.9643	72.7067	149.305
4930425O10Rik	6.15943	5.97782	5.00571	6.37364	1.97343	8.08221	2.84676	0	7.85815
4930427A07Rik	322.754	186.508	261.012	359.473	151.954	196.667	280.691	262.982	295.99
4930429B21Rik	40.6522	9.56451	45.0514	19.1209	2.96014	29.6348	7.40159	21.6573	19.2088
4930429D17Rik	6.15943	1.19556	2.14531	2.54946	0	0	3.41612	1.54695	2.61938
4930429F24Rik	13.5507	3.58669	19.3078	28.044	8.88042	8.98023	15.9419	9.28171	15.7163
4930430F08Rik	167.537	190.095	210.24	101.978	149.98	157.154	60.3514	160.883	161.529
4930431P03Rik	6.15943	3.58669	5.00571	8.9231	2.96014	13.4703	18.7886	17.0165	4.36564
4930432J09Rik	24.6377	5.97782	12.8718	15.2967	18.7476	17.9605	12.5258	18.5634	19.2088
4930432K21Rik	45.5798	88.4717	36.4702	34.4177	28.6147	60.1676	13.6645	46.4085	32.3057
4930433N12Rik	4.92754	0	0.715102	14.022	1.97343	8.98023	1.70806	4.64085	5.23876
4930440C22Rik	0	4.78225	0	0	0.986713	1.79605	0.569353	1.54695	3.49251
4930441O14Rik	55.4349	0	16.4473	19.1209	4.93357	5.38814	29.037	7.73475	54.1339
4930443O20Rik	12.3189	0	0	0	0	0	2.84676	0	1.74625
4930444A02Rik	716.958	1109.48	778.746	757.189	622.616	674.415	516.403	680.658	590.234
4930444F02Rik	3.69566	0	0	0	0.986713	0	2.84676	0	0.873127
4930444G20Rik	3.69566	10.7601	5.72082	3.82419	0.986713	6.28616	11.3871	1.54695	16.5894
4930444M15Rik	0	0	1.4302	0	4.93357	0	0.569353	1.54695	0.873127
4930444P10Rik	25.8696	2.39113	2.86041	5.09891	22.6944	2.69407	7.97094	10.8287	20.9551
4930448I06Rik	0	2.39113	6.43592	3.82419	6.90699	6.28616	5.12417	7.73475	7.85815
4930451C15Rik	256.232	147.054	119.422	209.056	148.007	132.009	191.303	255.247	323.057
4930452B06Rik	176.16	147.054	152.317	103.253	123.339	175.115	69.461	131.491	147.559
4930453N24Rik	994.132	645.604	817.361	734.244	723.261	788.464	855.168	691.487	740.412
4930455C13Rik	8.6232	1.19556	4.29061	5.09891	4.93357	5.38814	1.70806	12.3756	6.11189
4930455C21Rik	221.74	163.792	155.892	140.22	181.555	104.171	412.211	109.834	96.9171
4930455F23Rik	622.103	326.389	311.784	550.683	463.755	370.884	384.882	624.968	555.309
4930455H04Rik	7.39132	9.56451	0.715102	0	0	5.38814	0.569353	3.0939	15.7163
4930461G14Rik	0	2.39113	0	0	15.7874	0	25.6209	0	0
4930465K10Rik	7.39132	0	5.00571	2.54946	9.86713	0	7.97094	3.0939	0
4930467E23Rik	18.4783	16.7379	0	0	8.88042	0	14.2338	0	8.73127
4930470H14Rik	1364.93	523.657	559.925	1103.92	654.191	911.494	1154.65	1364.41	1117.6
4930471I20Rik	6.15943	3.58669	0.715102	0	2.96014	0	1.13871	3.0939	6.11189
4930471M23Rik	331.377	567.893	368.277	387.518	466.715	367.292	402.532	460.991	397.273
4930473A02Rik	4.92754	5.97782	2.14531	3.82419	2.96014	2.69407	1.13871	3.0939	4.36564
4930473A06Rik	135.507	47.8225	109.411	121.099	85.8441	75.434	80.2787	117.568	122.238
4930474G06Rik	25.8696	11.9556	9.29632	28.044	11.8406	17.9605	21.6354	26.2982	37.5445
4930478L05Rik	8.6232	0	0	2.54946	2.96014	0	1.13871	26.2982	0.873127
4930479D17Rik	4.92754	0	0	1.27473	4.93357	0	0	4.64085	0
4930481A15Rik	20.9421	41.8447	28.6041	6.37364	31.5748	16.1644	14.2338	52.5963	28.8132
4930483J18Rik	0	0	7.15102	5.09891	0	0	0	0	0
4930483K19Rik	7.39132	3.58669	0	1.27473	2.96014	3.59209	3.98547	6.1878	20.0819
4930483O08Rik	4.92754	10.7601	0	15.2967	0	4.49012	5.69353	18.5634	6.11189
4930487H11Rik	3.69566	0	0	0	0	0.898023	1.70806	9.28171	0
4930488B22Rik	7.39132	5.97782	9.29632	6.37364	5.92028	10.7763	8.54029	38.6738	7.85815
4930500J02Rik	13.5507	16.7379	12.8718	20.3957	5.92028	21.5526	32.4531	23.2043	27.9401
4930502A04Rik	6.15943	1.19556	0	1.27473	0	0	3.41612	9.28171	0
4930502E09Rik	11.087	0	0	1.27473	2.96014	7.18419	1.70806	0	0
4930502E18Rik	0	0	0	2.54946	7.89371	0	13.0951	1.54695	28.8132
4930503L19Rik	14.7826	27.498	20.0229	11.4726	22.6944	17.9605	39.8547	32.486	34.052
4930505A04Rik	23.4058	3.58669	1.4302	20.3957	2.96014	5.38814	3.98547	6.1878	15.7163
4930506M07Rik	1086.52	974.384	730.119	902.508	656.164	563.061	971.885	959.11	1116.73
4930507D05Rik	19.7102	23.9113	5.72082	15.2967	4.93357	8.98023	4.55482	13.9226	5.23876
4930509E16Rik	19.7102	1.19556	2.14531	3.82419	4.93357	1.79605	3.98547	6.1878	4.36564
4930509J09Rik	2.46377	1.19556	0	1.27473	1.97343	0.898023	1.70806	0	0
4930509K18Rik	3.69566	3.58669	0	1.27473	1.97343	0	0	4.64085	3.49251
4930511A02Rik	0	2.39113	4.29061	5.09891	0	1.79605	0	1.54695	1.74625
4930511M06Rik	534.639	219.984	293.907	522.639	280.227	391.538	495.906	577.013	447.914
4930511M11Rik	1.23189	0	0	1.27473	0	1.79605	2.84676	0	1.74625
4930512B01Rik	6.15943	4.78225	2.14531	1.27473	1.97343	6.28616	2.84676	9.28171	7.85815
4930513D17Rik	6.15943	0	0.715102	0	21.7077	4.49012	6.83223	0	1.74625
4930513N10Rik	44.3479	37.0625	7.86612	34.4177	13.814	17.0624	2.27741	13.9226	15.7163
4930515G01Rik	2.46377	20.3246	20.0229	1.27473	15.7874	9.87826	1.70806	10.8287	21.8282
4930519F09Rik	144.131	35.8669	78.6612	112.176	49.3357	127.519	117.287	228.949	129.223
4930519H02Rik	3.69566	7.17338	0	10.1978	0.986713	11.6743	0	10.8287	3.49251
4930520O04Rik	1.23189	1.19556	0	1.27473	15.7874	14.3684	0.569353	13.9226	8.73127
4930520P13Rik	1.23189	2.39113	0	1.27473	0	1.79605	0	1.54695	3.49251
4930523C07Rik	1903.26	1615.21	2296.91	1527.12	2355.29	3216.72	2978.28	2738.1	2429.04
4930524L23Rik	9.85509	0	25.7437	6.37364	5.92028	0	0	0	8.73127
4930525D18Rik	2.46377	2.39113	0	0	0.986713	1.79605	0	7.73475	1.74625
4930525G20Rik	20.9421	19.129	21.4531	12.7473	13.814	14.3684	77.432	1.54695	23.5744
4930526L06Rik	11.087	11.9556	8.58122	8.9231	10.8538	17.0624	6.83223	9.28171	15.7163
4930528A17Rik	27.1015	4.78225	29.3192	28.044	28.6147	55.6774	33.5918	29.3921	23.5744
4930528D03Rik	40.6522	5.97782	12.1567	38.2419	31.5748	27.8387	31.8838	54.1433	19.2088
4930529M08Rik	44.3479	16.7379	15.7322	33.1429	25.6546	11.6743	22.7741	60.3311	44.5295
4930533B01Rik	0	0	2.14531	5.09891	3.94685	0	1.70806	0	0
4930534B04Rik	341.232	78.9072	138.015	127.473	157.874	76.332	177.069	182.54	121.365
4930538K18Rik	0	0	5.00571	10.1978	0	20.6545	0.569353	9.28171	9.6044
4930539E08Rik	70.2175	23.9113	30.0343	58.6375	38.4818	74.5359	53.5192	92.8171	75.089
4930539J05Rik	36.9566	37.0625	30.0343	35.6924	17.7608	23.3486	26.7596	29.3921	19.2088
4930544O15Rik	2.46377	0	0	0	5.92028	0	3.41612	1.54695	7.85815
4930545H06Rik	1.23189	1.19556	1.4302	3.82419	7.89371	0	3.41612	3.0939	6.11189
4930545L23Rik	3.69566	0	3.57551	2.54946	2.96014	4.49012	11.3871	0	2.61938
4930546K05Rik	22.174	16.7379	7.86612	17.8462	6.90699	10.7763	10.8177	41.7677	37.5445
4930547N16Rik	87.4639	98.0362	25.0286	19.1209	21.7077	78.128	0	41.7677	56.7533
4930548H24Rik	0	0	0	0	0	3.59209	5.12417	0	0
4930548J01Rik	0	0	0.715102	0	3.94685	0	3.41612	7.73475	1.74625
4930549G23Rik	16.0145	16.7379	7.15102	28.044	9.86713	12.5723	22.2048	43.3146	21.8282
4930550C14Rik	67.7537	16.7379	56.4931	65.0112	10.8538	23.3486	6.26288	17.0165	37.5445
4930552P12Rik	0	0	0	0	0	18.8585	0	0	23.5744
4930555I21Rik	12.3189	2.39113	0.715102	3.82419	0	18.8585	3.98547	10.8287	2.61938
4930556M19Rik	314.131	314.433	228.118	421.935	171.688	227.2	151.448	201.104	371.079
4930557A04Rik	0	0	0	0	10.8538	8.08221	0	0	0
4930558C23Rik	3.69566	0	0.715102	0	0	4.49012	0	0	6.98502
4930558J18Rik	22.174	2.39113	5.72082	17.8462	31.5748	18.8585	20.4967	35.5799	13.0969
4930562C15Rik	351.088	121.947	201.659	304.66	283.187	214.628	331.363	286.186	338.773
4930562F07Rik	189.71	319.216	203.804	160.616	163.794	332.269	237.42	408.395	260.192
4930563E18Rik	12.3189	2.39113	7.86612	6.37364	6.90699	13.4703	10.8177	1.54695	6.98502
4930563E22Rik	33.2609	53.8004	65.0743	8.9231	24.6678	42.2071	58.6433	54.1433	24.4476
4930563M20Rik	7.39132	5.97782	3.57551	1.27473	7.89371	8.08221	7.97094	7.73475	1.74625
4930564K09Rik	20.9421	2.39113	5.72082	12.7473	0	15.2664	13.0951	21.6573	22.7013
4930565N06Rik	6.15943	1.19556	2.14531	5.09891	11.8406	8.08221	9.679	17.0165	6.98502
4930568E12Rik	1.23189	1.19556	0.715102	0	0.986713	3.59209	2.27741	0	3.49251
4930568K20Rik	0	0	0	12.7473	0.986713	16.1644	5.12417	6.1878	7.85815
4930572J05Rik	397.899	248.677	278.89	247.297	287.134	425.663	421.321	341.876	367.587
4930578C19Rik	0	0	1.4302	0	8.88042	0	0	0	5.23876
4930578E11Rik	2.46377	0	0	1.27473	0.986713	0	2.84676	1.54695	3.49251
4930578M01Rik	0	1.19556	0	1.27473	0	4.49012	6.83223	7.73475	2.61938
4930578N16Rik	54.203	22.7157	47.1967	36.9671	57.2294	74.5359	44.4095	68.0658	74.2158
4930579C15Rik	0	0	0	7.64837	3.94685	8.08221	2.27741	3.0939	0
4930579G18Rik	33.2609	13.1512	23.5984	40.7913	20.721	17.0624	27.8983	54.1433	27.0669
4930579G22Rik	22.174	23.9113	18.5926	16.5715	17.7608	23.3486	6.83223	24.7512	32.3057
4930579G24Rik	89.9277	69.3427	47.1967	104.528	138.14	97.8845	42.1321	97.4579	151.924
4930579K19Rik	14.7826	27.498	9.29632	16.5715	23.6811	41.3091	28.4676	24.7512	19.2088
4930581F22Rik	45.5798	101.623	62.2139	109.627	83.8706	50.2893	78.5707	140.773	107.395
4930583H14Rik	0	9.56451	0	5.09891	0	4.49012	3.41612	4.64085	0
4930583K01Rik	0	0	0	0	0.986713	4.49012	2.27741	4.64085	1.74625
4930588N13Rik	30.7972	0	0	7.64837	42.4287	24.2466	4.55482	9.28171	9.6044
4930592I03Rik	2.46377	0	0	0	1.97343	0	7.40159	9.28171	2.61938
4930593C16Rik	0	2.39113	2.14531	1.27473	0	4.49012	0.569353	0	8.73127
4930594C11Rik	18.4783	25.1068	2.14531	21.6704	19.7343	45.7992	48.9643	52.5963	31.4326
4930599N23Rik	4.92754	7.17338	2.86041	10.1978	0	7.18419	4.55482	1.54695	10.4775
4931402G19Rik	22.174	20.3246	6.43592	28.044	10.8538	17.9605	11.9564	20.1104	26.1938
4931403G20Rik	8.6232	1.19556	25.0286	16.5715	9.86713	14.3684	5.12417	10.8287	20.9551
4931406B18Rik	6.15943	2.39113	2.86041	12.7473	2.96014	5.38814	8.54029	6.1878	6.11189
4931406C07Rik	332.609	387.363	290.331	221.803	435.141	407.703	331.363	344.97	346.632
4931406H21Rik	75.1451	66.9516	32.1796	169.539	64.1364	109.559	134.367	244.418	129.223
4931406P16Rik	721.885	1015.03	1263.59	924.178	1075.52	1278.79	1444.45	952.922	1131.57
4931408A02Rik	561.74	491.377	341.819	415.562	608.802	1030.93	592.696	668.283	374.572
4931408D14Rik	30.7972	138.685	152.317	145.319	46.3755	79.9241	104.761	51.0494	71.5964
4931414P19Rik	70.2175	33.4758	47.1967	62.4617	85.8441	31.4308	45.5482	66.5189	23.5744
4931417G12Rik	2.46377	2.39113	0	0	0	0.898023	0.569353	1.54695	6.98502
4931420L22Rik	20.9421	5.97782	2.86041	8.9231	7.89371	8.08221	14.8032	17.0165	3.49251
4931423N10Rik	0	0	0	1.27473	0	12.5723	0	0	7.85815
4931428F04Rik	109.638	202.05	60.0686	217.979	219.05	168.828	261.902	108.287	105.648
4931428L18Rik	20.9421	21.5201	10.7265	22.9451	10.8538	23.3486	14.8032	35.5799	20.0819
4931429I11Rik	38.1885	5.97782	22.8833	53.5386	17.7608	5.38814	27.8983	6.1878	0.873127
4931429L15Rik	4.92754	4.78225	1.4302	8.9231	2.96014	3.59209	1.70806	1.54695	11.3507
4931430N09Rik	25.8696	0	1.4302	10.1978	0	0	0.569353	3.0939	0.873127
4931431C16Rik	16.0145	7.17338	3.57551	12.7473	10.8538	21.5526	29.037	9.28171	30.5595
4931440F15Rik	0	2.39113	0	3.82419	0	0	0.569353	0	22.7013
4931440J10Rik	1.23189	1.19556	2.86041	1.27473	0	0.898023	1.13871	1.54695	0
4931440P22Rik	28.3334	54.9959	27.1739	33.1429	29.6014	44.9012	40.424	38.6738	28.8132
4932411E22Rik	12.3189	9.56451	0	1.27473	0	10.7763	8.54029	0	20.9551
4932411L15	1877.39	950.473	931.778	1683.92	984.74	1426.96	1411.99	2376.12	1855.4
4932412D23Rik	2.46377	0	1.4302	1.27473	0	0	6.83223	1.54695	0
4932412H11Rik	2.46377	0	2.14531	2.54946	1.97343	0	3.98547	0	7.85815
4932414N04Rik	8.6232	10.7601	5.00571	8.9231	19.7343	16.1644	6.83223	17.0165	11.3507
4932415G12Rik	41.8841	107.601	72.2253	52.2639	86.8308	145.48	44.9789	81.9884	111.76
4932416H05Rik	173.696	133.903	136.584	112.176	104.592	196.667	115.579	114.474	93.4246
4932416K20Rik	0	1.19556	0	1.27473	0.986713	1.79605	3.41612	0	0
4932418E24Rik	94.8552	1.19556	10.7265	19.1209	10.8538	2.69407	3.41612	32.486	13.0969
4932425I24Rik	198.334	62.1693	19.3078	82.8574	65.1231	69.1478	19.358	66.5189	112.633
4932438A13Rik	1515.22	1842.36	1243.56	1459.56	1549.14	1265.31	1934.09	1689.27	1622.27
4932438H23Rik	6.15943	3.58669	12.1567	1.27473	0	3.59209	5.69353	0	0.873127
4932443I19Rik	9.85509	7.17338	0	11.4726	0.986713	3.59209	1.70806	15.4695	6.11189
4933400F21Rik	23.4058	3.58669	2.14531	8.9231	17.7608	37.717	31.8838	29.3921	2.61938
4933401D09Rik	6.15943	1.19556	4.29061	8.9231	8.88042	3.59209	14.2338	12.3756	4.36564
4933401H06Rik	2.46377	0	0	2.54946	1.97343	0	1.13871	3.0939	1.74625
4933402N22Rik	0	0	4.29061	0	0	3.59209	0	4.64085	4.36564
4933403F05Rik	1069.28	1231.43	1324.37	1277.28	936.391	784.872	857.445	1208.17	987.507
4933403G14Rik	107.174	51.4092	27.1739	147.869	90.7776	50.2893	114.44	74.2536	49.7683
4933404K08Rik	19.7102	13.1512	12.8718	14.022	12.8273	13.4703	16.5112	32.486	20.0819
4933404M02Rik	333.841	204.441	112.986	184.836	93.7378	129.315	120.133	213.479	190.342
4933404O12Rik	92.3915	60.9737	95.8237	179.737	162.808	74.5359	99.6367	44.8616	75.089
4933405D12Rik	24.6377	13.1512	8.58122	16.5715	17.7608	17.0624	15.3725	23.2043	21.8282
4933406C10Rik	14.7826	8.36895	31.4645	21.6704	13.814	3.59209	10.8177	12.3756	30.5595
4933407C03Rik	1852.76	1131	1348.68	1066.95	1267.93	1502.39	1516.19	1579.44	1543.69
4933407G14Rik	11.087	3.58669	10.7265	22.9451	8.88042	15.2664	11.9564	13.9226	18.3357
4933407H18Rik	322.754	371.82	357.551	314.858	373.964	388.844	314.852	462.538	364.094
4933407K13Rik	240.218	33.4758	97.969	188.66	84.8574	105.069	162.266	298.562	169.387
4933407L21Rik	2.46377	0	0.715102	2.54946	5.92028	0	1.13871	4.64085	2.61938
4933408B17Rik	9.85509	3.58669	5.72082	14.022	12.8273	8.08221	11.9564	10.8287	20.9551
4933408J17Rik	1.23189	3.58669	2.86041	2.54946	1.97343	7.18419	0.569353	4.64085	2.61938
4933408N05Rik	91.1596	53.8004	56.4931	75.209	56.2427	79.9241	82.5561	122.209	73.3427
4933409K07Rik	1528.77	2043.22	1398.02	1515.65	1489.94	1923.57	1211.58	1912.03	1854.52
4933411E08Rik	23.4058	16.7379	4.29061	10.1978	15.7874	20.6545	13.6645	47.9555	7.85815
4933411K16Rik	0	0	12.1567	6.37364	3.94685	3.59209	0	0	0
4933411K20Rik	526.015	437.576	542.047	472.924	378.898	420.275	426.445	437.787	588.488
4933412E12Rik	41.8841	15.5423	45.0514	42.066	91.7644	98.7826	156.003	10.8287	31.4326
4933413J09Rik	19.7102	5.97782	6.43592	10.1978	50.3224	17.0624	64.9062	52.5963	12.2238
4933413L06Rik	17.2464	1.19556	6.43592	10.1978	2.96014	12.5723	11.3871	24.7512	15.7163
4933416M06Rik	0	1.19556	2.86041	2.54946	0	3.59209	1.70806	3.0939	1.74625
4933416M07Rik	17.2464	10.7601	15.7322	17.8462	12.8273	28.7367	50.103	46.4085	5.23876
4933417D19Rik	4.92754	4.78225	17.1624	3.82419	2.96014	2.69407	3.41612	0	2.61938
4933417O13Rik	17.2464	0	0	6.37364	0	0	0	0	1.74625
4933421E11Rik	378.189	436.381	474.113	415.562	382.845	396.028	268.734	512.041	619.92
4933421O10Rik	247.609	197.268	145.881	275.341	215.104	211.035	203.828	273.81	177.245
4933422A05Rik	1.23189	0	2.14531	1.27473	0	0	0	0	9.6044
4933424B01Rik	1091.45	970.798	1171.34	1019.78	932.444	778.586	660.449	864.746	626.905
4933424G05Rik	2.46377	0	0	5.09891	1.97343	0.898023	0	0	34.9251
4933424G06Rik	1.23189	0	0.715102	5.09891	0	0	6.26288	0	4.36564
4933425O20Rik	0	0	0	2.54946	0	0.898023	3.98547	1.54695	4.36564
4933426D04Rik	8.6232	9.56451	12.8718	15.2967	6.90699	3.59209	6.26288	4.64085	12.2238
4933426M11Rik	1421.6	1576.95	1604.69	1653.32	2196.42	2105.86	2045.12	1055.02	1388.27
4933427D06Rik	3.69566	0	0	0	0.986713	0.898023	2.84676	10.8287	6.11189
4933427D14Rik	359.711	132.708	270.309	327.605	361.137	372.68	261.902	422.318	454.026
4933427E11Rik	16.0145	5.97782	5.72082	12.7473	16.7741	12.5723	11.9564	3.0939	6.98502
4933427G17Rik	0	1.19556	1.4302	1.27473	0	8.08221	11.3871	0	0
4933428C19Rik	0	3.58669	1.4302	0	1.97343	1.79605	3.98547	0	3.49251
4933429O19Rik	6.15943	0	1.4302	7.64837	1.97343	0.898023	3.41612	6.1878	1.74625
4933430H15Rik	657.827	39.4536	175.915	447.43	232.864	198.463	186.748	484.196	416.482
4933430I17Rik	11.087	0	15.0171	16.5715	0.986713	2.69407	2.27741	4.64085	2.61938
4933431E20Rik	162.609	148.25	195.938	163.165	222.011	220.914	184.47	165.524	247.095
4933431G14Rik	38.1885	13.1512	11.4416	25.4946	0	13.4703	32.4531	35.5799	35.7982
4933432B09Rik	65.29	51.4092	97.969	103.253	59.2028	68.2498	105.9	207.291	81.2008
4933432I09Rik	0	0	0	0	8.88042	0	0	6.1878	0
4933433C11Rik	6.15943	11.9556	0	8.9231	0	8.98023	2.27741	0	1.74625
4933433G15Rik	11.087	2.39113	12.1567	7.64837	15.7874	8.98023	13.6645	0	13.0969
4933433G19Rik	2.46377	0	0.715102	8.9231	1.97343	0	1.70806	0	0
4933433P14Rik	748.987	700.6	1172.77	920.354	1077.49	718.419	844.919	782.757	777.083
4933434E20Rik	1245.44	1832.8	1558.92	1393.28	1298.51	1226.7	1619.24	1520.65	1553.29
4933436C20Rik	118.261	21.5201	37.9004	59.9122	77.9504	58.3715	54.0885	153.148	80.3277
4933437F05Rik	12.3189	10.7601	0	1.27473	4.93357	0.898023	10.8177	0	3.49251
4933438K21Rik	9.85509	4.78225	0	12.7473	10.8538	5.38814	4.55482	13.9226	6.11189
4933439C10Rik	199.566	139.881	185.926	197.583	182.542	175.115	167.39	136.132	138.827
4933439F18Rik	599.929	639.627	972.539	933.101	881.135	546.896	527.221	539.886	586.742
4933439K11Rik	28.3334	8.36895	13.5869	36.9671	11.8406	0.898023	17.6499	24.7512	26.1938
4933440J02Rik	8.6232	3.58669	1.4302	10.1978	5.92028	1.79605	7.97094	15.4695	10.4775
4933440M02Rik	0	7.17338	20.0229	0	0	0	2.27741	4.64085	0
5031410I06Rik	3.69566	0	3.57551	11.4726	0	0	0	0	0
5031414D18Rik	0	8.36895	0	0	0	14.3684	15.9419	0	2.61938
5031425E22Rik	400.363	200.855	348.97	419.386	312.788	310.716	388.299	380.55	349.251
5031426D15Rik	170	44.2359	62.2139	118.55	103.605	90.7004	117.287	143.866	150.178
5031434O11Rik	14.7826	8.36895	10.7265	7.64837	9.86713	17.9605	12.5258	9.28171	16.5894
5031439G07Rik	460.725	320.411	350.4	257.495	796.278	609.758	895.023	507.4	500.302
5033403H07Rik	27.1015	35.8669	17.1624	45.8902	9.86713	11.6743	3.41612	26.2982	29.6863
5033406O09Rik	131.812	99.2318	120.137	142.77	73.0168	77.23	95.0819	119.115	96.9171
5033411D12Rik	66.5219	133.903	72.9404	47.165	97.6846	114.049	72.8772	105.193	95.1709
5033414D02Rik	558.044	1733.57	1187.78	817.101	318.708	404.11	573.338	1073.58	582.376
5133401N09Rik	476.74	382.58	342.534	330.155	253.585	337.657	341.042	397.566	425.213
5330413P13Rik	18.4783	0	26.4588	15.2967	6.90699	3.59209	1.70806	38.6738	43.6564
5330417C22Rik	1324.28	2937.5	2003.72	1871.3	2919.69	2959.88	1676.17	1523.75	1704.34
5330426P16Rik	147.826	77.7116	87.9575	110.901	74.9902	31.4308	153.156	150.054	122.238
5330437I02Rik	38.1885	16.7379	7.86612	25.4946	43.4154	62.8616	101.914	24.7512	32.3057
5430402O13Rik	19.7102	3.58669	6.43592	10.1978	0	4.49012	9.679	1.54695	0.873127
5430405G05Rik	0	4.78225	0	0	0.986713	0	6.83223	0	0
5430405H02Rik	232.826	247.482	124.428	294.462	235.825	237.976	229.449	292.374	264.558
5430407P10Rik	1135.8	1293.6	1515.3	1121.76	2164.85	2157.95	2363.38	1217.45	729.061
5430411K18Rik	405.291	267.806	440.503	456.353	305.881	516.363	453.205	460.991	451.407
5430416N02Rik	150.29	178.139	147.311	232.001	139.127	154.46	100.206	198.01	157.163
5430416O09Rik	389.276	157.814	191.647	462.727	722.274	449.91	513.556	289.28	274.162
5430417L22Rik	447.175	193.681	308.209	223.078	269.373	194.871	296.633	380.55	421.721
5430419D17Rik	0	0	0	0	0	24.2466	0	0	0
5430421F17Rik	9.85509	10.7601	2.14531	7.64837	24.6678	105.967	9.679	15.4695	9.6044
5430421N21Rik	7.39132	1.19556	4.29061	2.54946	1.97343	11.6743	0	1.54695	0
5430427M07Rik	4.92754	5.97782	5.00571	7.64837	4.93357	6.28616	3.98547	17.0165	10.4775
5430427O19Rik	36.9566	62.1693	25.7437	38.2419	62.1629	68.2498	169.667	61.878	104.775
5430428K19Rik	4.92754	0	0	0	0	1.79605	3.41612	3.0939	7.85815
5430435G22Rik	48.0436	83.6895	79.3763	52.2639	0.986713	22.4506	109.316	29.3921	61.992
5430437J10Rik	7.39132	3.58669	4.29061	10.1978	2.96014	16.1644	15.9419	6.1878	11.3507
5430437P03Rik	1213.41	1109.48	1243.56	917.805	1114	989.622	980.425	1116.9	1002.35
5430440P10Rik	6.15943	16.7379	10.0114	6.37364	0.986713	0.898023	11.9564	10.8287	13.97
5530601H04Rik	182.319	172.161	109.411	132.572	166.755	153.562	247.668	199.557	165.021
5730403B10Rik	1664.28	1624.77	1749.14	1882.77	1747.47	1933.44	2187.45	1769.71	1675.53
5730403I07Rik	12.3189	13.1512	17.8775	28.044	15.7874	14.3684	22.7741	38.6738	33.1788
5730405O15Rik	9.85509	7.17338	5.72082	11.4726	20.721	17.9605	7.40159	7.73475	0
5730408K05Rik	51.7392	14.3468	38.6155	39.5166	32.5615	25.1447	30.745	43.3146	42.7832
5730409E04Rik	105.942	69.3427	85.8122	96.8794	30.5881	129.315	73.4465	80.4414	73.3427
5730419I09Rik	542.03	583.435	579.948	755.914	415.406	366.394	491.921	645.079	692.39
5730420D15Rik	49.2754	46.627	46.4816	39.5166	42.4287	74.5359	70.5997	34.0329	51.5145
5730422E09Rik	6.15943	9.56451	16.4473	7.64837	0.986713	0.898023	4.55482	17.0165	8.73127
5730437N04Rik	845.074	686.254	251.716	850.244	586.108	504.689	885.344	304.749	623.413
5730455O13Rik	236.522	215.201	215.246	187.385	274.306	212.832	177.638	187.181	166.767
5730455P16Rik	432.392	670.711	725.828	423.21	444.021	740.869	808.481	615.686	567.533
5730460C07Rik	6.15943	0	0	6.37364	1.97343	3.59209	4.55482	7.73475	5.23876
5730469M10Rik	6190.23	11402.1	9805.48	5531.05	7004.68	8832.96	5576.81	9037.29	8584.59
5730480H06Rik	29.5653	10.7601	26.4588	10.1978	4.93357	41.3091	17.0806	15.4695	49.7683
5730494M16Rik	227.899	209.224	218.106	294.462	264.439	297.246	350.152	352.705	258.446
5730494N06Rik	1033.55	1196.76	983.98	896.134	988.687	1134.2	1172.87	957.563	1045.13
5730507C01Rik	234.058	174.552	161.613	225.627	297.987	197.565	200.412	281.545	244.476
5730508B09Rik	418.841	428.012	587.099	332.704	963.032	1171.92	740.728	634.25	551.817
5730522E02Rik	1.23189	0	0	1.27473	5.92028	4.49012	0.569353	0	0
5730528L13Rik	57.8987	22.7157	15.0171	17.8462	81.8972	119.437	116.717	38.6738	50.6414
5730559C18Rik	1213.41	2285.92	1707.66	1592.14	1304.44	1255.44	1238.34	1423.19	1166.5
5730577I03Rik	121.957	115.97	75.0857	117.275	99.6581	117.641	94.5126	123.756	82.9471
5730590G19Rik	40.6522	13.1512	0.715102	30.5935	113.472	20.6545	22.7741	97.4579	72.4696
5830411N06Rik	0	0	0	0	0	0	31.3144	0	0
5830415F09Rik	153.986	66.9516	163.758	178.462	150.967	138.296	209.522	78.8945	140.574
5830416P10Rik	144.131	112.383	185.926	127.473	8.88042	42.2071	34.1612	109.834	41.037
5830417I10Rik	1140.73	1062.86	840.245	1186.77	938.365	899.819	1000.35	1215.9	1091.41
5830418K08Rik	268.551	340.736	195.223	254.946	307.855	183.197	282.968	297.015	192.961
5830418P13Rik	1.23189	0	1.4302	2.54946	1.97343	1.79605	4.55482	0	1.74625
5830428M24Rik	299.348	141.077	212.385	140.22	354.23	413.989	356.415	242.871	236.618
5830432E09Rik	4.92754	1.19556	2.14531	6.37364	0.986713	3.59209	7.97094	0	0
5830433M19Rik	287.029	255.851	288.901	398.99	248.652	296.348	212.938	293.921	272.416
5830473C10Rik	0	5.97782	10.7265	2.54946	0.986713	2.69407	2.27741	3.0939	3.49251
5930403L14Rik	343.696	212.81	311.784	323.781	182.542	114.947	204.398	365.08	275.908
5930412G12Rik	11.087	7.17338	3.57551	6.37364	0	3.59209	10.2483	21.6573	3.49251
5930416I19Rik	572.827	546.373	489.845	591.474	361.137	447.216	310.297	419.224	464.504
5930434B04Rik	1175.22	1299.58	1207.09	1167.65	891.989	859.408	764.071	894.138	1048.63
6030407O03Rik	2.46377	3.58669	0	3.82419	0	0	0	0	2.61938
6030408B16Rik	165.073	33.4758	61.4988	140.22	84.8574	132.009	104.192	170.165	128.35
6030419C18Rik	0	4.78225	0	0	3.94685	1.79605	0.569353	0	0
6030422M02Rik	213.116	119.556	88.6726	184.836	149.98	141.888	232.865	303.202	203.439
6030429G01Rik	241.45	117.165	62.2139	135.121	174.648	195.769	154.864	239.777	162.402
6030440G07Rik	16.0145	7.17338	12.8718	21.6704	16.7741	13.4703	14.2338	17.0165	14.8432
6030446N20Rik	157.681	191.29	252.431	173.363	148.007	188.585	270.443	106.74	225.267
6030458C11Rik	708.335	686.254	734.41	1007.04	802.198	537.018	759.517	802.868	743.905
6230400D17Rik	12.3189	23.9113	26.4588	39.5166	31.5748	8.98023	32.4531	63.425	20.9551
6230409E13Rik	30.7972	221.179	8.58122	16.5715	82.8839	172.42	280.691	78.8945	0
6230427J02Rik	8.6232	0	5.00571	0	11.8406	14.3684	4.55482	0	3.49251
6330403K07Rik	17.2464	0	0	2.54946	7.89371	0	0	4.64085	0
6330406I15Rik	135.507	239.113	271.739	70.1101	205.236	566.653	156.572	389.832	277.655
6330407A03Rik	30.7972	1.19556	5.00571	12.7473	10.8538	33.2269	35.2999	21.6573	11.3507
6330407J23Rik	0	9.56451	0	5.09891	0	0.898023	0.569353	3.0939	0
6330408A02Rik	66.5219	179.335	52.2024	110.901	87.8175	48.4933	88.819	94.364	89.059
6330409D20Rik	0	0	0	0	3.94685	3.59209	1.70806	0	0
6330409N04Rik	506.305	512.897	629.29	481.847	624.59	863.898	672.406	440.881	587.615
6330410L21Rik	23.4058	11.9556	10.0114	25.4946	16.7741	24.2466	25.0515	23.2043	35.7982
6330416G13Rik	1048.34	700.6	894.593	1389.45	923.564	696.866	925.198	740.989	1333.27
6330418K02Rik	25.8696	22.7157	45.0514	40.7913	13.814	14.3684	11.9564	44.8616	27.0669
6330439K17Rik	210.653	59.7782	85.8122	135.121	224.971	143.684	105.33	78.8945	112.633
6330503K22Rik	869.712	307.26	449.084	587.65	574.267	431.051	319.976	496.571	784.068
6330512M04Rik	17.2464	14.3468	28.6041	11.4726	15.7874	46.6972	17.6499	41.7677	31.4326
6330545A04Rik	0	3.58669	4.29061	12.7473	3.94685	8.98023	0.569353	3.0939	3.49251
6330549D23Rik	1.23189	0	0.715102	8.9231	3.94685	9.87826	1.13871	29.3921	0
6330578E17Rik	2097.9	2044.41	2301.91	2079.08	2860.48	2595.29	2611.05	1670.71	1971.52
6430527G18Rik	1686.45	2302.66	2233.98	2348.05	1671.49	1549.09	1787.2	1378.33	1713.08
6430531B16Rik	29.5653	5.97782	30.0343	15.2967	34.535	59.2695	35.2999	68.0658	56.7533
6430548G04	35.7247	23.9113	27.1739	48.4397	28.6147	65.5557	22.7741	54.1433	46.2758
6430548M08Rik	285.798	285.74	309.639	304.66	87.8175	248.752	347.305	338.782	413.862
6430550D23Rik	17.2464	22.7157	15.7322	20.3957	39.4685	16.1644	11.9564	32.486	41.037
6430562O15Rik	8.6232	0	0	3.82419	0	0	1.13871	1.54695	0
6430571L13Rik	0	16.7379	0	7.64837	8.88042	13.4703	35.2999	12.3756	6.11189
6430573F11Rik	75.1451	32.2802	32.1796	38.2419	56.2427	34.1249	13.6645	21.6573	48.8951
6430598A04Rik	29.5653	80.1028	26.4588	62.4617	65.1231	67.3517	70.5997	63.425	46.2758
6430704M03Rik	13.5507	0	0	5.09891	0	0	0	0	0
6430706D22Rik	831.523	465.074	597.825	562.155	881.135	970.763	358.692	869.386	454.026
6530401N04Rik	369.566	670.711	441.933	333.979	465.729	476.85	458.898	244.418	431.325
6530402F18Rik	0	22.7157	0	0	0	0	0	0	0
6530418L21Rik	134.276	46.627	50.0571	109.627	106.565	87.1083	255.07	44.8616	195.581
6720401G13Rik	1920.51	1064.05	1972.97	2156.84	1800.75	1576.93	1984.19	2881.97	1629.26
6720456B07Rik	2431.74	2569.27	3168.62	2332.75	2550.65	2474.95	2459.6	1949.16	2430.79
6720456H20Rik	464.421	402.905	493.42	331.429	377.911	418.479	292.078	273.81	509.033
6720463M24Rik	104.71	147.054	85.8122	216.704	139.127	48.4933	70.0304	123.756	171.133
6720468P15Rik	0	13.1512	20.0229	0	0	0	0	9.28171	0
6720483E21Rik	9.85509	8.36895	14.302	0	14.8007	8.08221	0.569353	9.28171	0.873127
6720489N17Rik	208.189	147.054	40.0457	52.2639	133.206	92.4964	95.6513	18.5634	94.2978
6820408C15Rik	155.218	35.8669	82.2367	93.0552	46.3755	43.1051	108.177	81.9884	116.999
6820431F20Rik	10452.6	11262.2	8594.81	10887.5	9134.99	8693.76	6808.89	15098.2	9578.21
7420700N18Rik	1.23189	8.36895	3.57551	10.1978	3.94685	1.79605	3.98547	1.54695	6.11189
7420701I03Rik	3.69566	4.78225	2.14531	2.54946	0.986713	0	1.13871	1.54695	1.74625
7530416G11Rik	0	0	1.4302	0	0	0.898023	6.26288	3.0939	0.873127
7530420F21Rik	7.39132	11.9556	9.29632	3.82419	0	4.49012	0	3.0939	0.873127
8030423F21Rik	103.478	22.7157	24.3135	44.6155	41.442	37.717	52.9498	75.8006	70.7233
8030442B05Rik	81.3045	25.1068	32.1796	24.2198	21.7077	44.9012	51.8111	23.2043	39.2907
8030462N17Rik	140.435	162.597	163.758	274.067	126.299	201.157	362.108	279.998	254.08
8430403D17Rik	49.2754	33.4758	15.0171	48.4397	28.6147	43.1051	42.7015	80.4414	90.8053
8430406I07Rik	314.131	237.917	465.531	527.738	297.987	103.273	133.798	191.822	182.484
8430408G22Rik	2309.79	5792.51	4166.18	1307.87	2469.74	4332.06	2152.72	5770.13	2761.7
8430410A17Rik	917.755	845.264	1057.64	1018.51	791.344	729.195	663.865	957.563	688.024
8430410K20Rik	540.798	916.997	742.991	673.057	792.331	658.251	746.421	723.973	797.165
8430419L09Rik	460.725	234.33	133.009	281.715	98.6713	33.2269	186.178	139.226	320.438
8430427H17Rik	498.914	546.373	565.646	730.42	218.064	246.956	240.836	552.261	429.579
8430429K09Rik	144.131	93.254	109.411	108.352	173.662	218.22	74.5852	159.336	103.902
9030025P20Rik	208.189	272.589	233.838	230.726	253.585	376.272	202.12	287.733	168.514
9030204H09Rik	13.5507	1.19556	3.57551	10.1978	5.92028	6.28616	7.97094	10.8287	10.4775
9030224M15Rik	6.15943	38.258	10.0114	2.54946	16.7741	16.1644	16.5112	4.64085	0
9030404E10Rik	28.3334	27.498	35.04	49.7144	0.986713	32.3288	33.0225	37.1268	11.3507
9030418K01Rik	1.23189	0	0	2.54946	6.90699	38.615	17.0806	0	9.6044
9030425E11Rik	3.69566	56.1915	30.0343	8.9231	45.3888	27.8387	223.186	4.64085	115.253
9030617O03Rik	29.5653	4.78225	40.0457	25.4946	40.4553	32.3288	66.6143	63.425	49.7683
9030619P08Rik	13.5507	10.7601	18.5926	6.37364	0	6.28616	1.13871	4.64085	8.73127
9030624G23Rik	197.102	212.81	261.012	187.385	171.688	313.41	257.347	211.932	232.252
9030624J02Rik	1054.49	1663.03	1244.28	1269.63	1083.41	1456.59	1503.09	1106.07	1280
9030625A04Rik	259.928	155.423	203.089	207.781	297.001	236.18	215.215	207.291	330.042
9130008F23Rik	203.261	283.349	440.503	327.605	1097.23	686.09	516.972	409.942	406.004
9130011E15Rik	226.667	285.74	268.163	314.858	216.09	249.65	309.728	348.064	320.438
9130011J15Rik	2102.83	2417.43	2271.88	1732.36	2035.59	2140.89	2034.3	2297.22	1629.26
9130014G24Rik	75.1451	0	65.0743	105.802	108.538	86.2102	14.2338	102.099	41.9101
9130015A21Rik	3.69566	0	0.715102	1.27473	1.97343	0.898023	1.70806	4.64085	0
9130017N09Rik	389.276	714.947	787.327	456.353	339.429	301.736	281.26	491.93	278.528
9130019O22Rik	253.769	192.486	113.701	138.945	332.522	128.417	150.878	131.491	148.432
9130019P16Rik	2.46377	16.7379	0	5.09891	0.986713	1.79605	0	13.9226	0
9130023H24Rik	184.783	196.072	146.596	197.583	108.538	42.2071	240.836	89.7232	144.066
9130024F11Rik	0	0	0	1.27473	0.986713	0	6.83223	3.0939	0.873127
9130204L05Rik	0	0	0	0	3.94685	71.8419	0	0	0
9130206I24Rik	0	0	11.4416	0	5.92028	1.79605	1.13871	10.8287	0
9130209A04Rik	9.85509	5.97782	2.86041	8.9231	8.88042	8.98023	2.84676	7.73475	6.98502
9130221F21Rik	73.9132	45.4314	67.2196	85.4068	52.2958	66.4537	50.103	150.054	93.4246
9130221H12Rik	43.116	44.2359	48.6269	22.9451	30.5881	60.1676	38.716	80.4414	75.9621
9130227L01Rik	13.5507	14.3468	7.15102	21.6704	10.8538	8.98023	17.6499	26.2982	13.0969
9130230L23Rik	86.232	34.6713	11.4416	44.6155	164.781	106.865	98.498	49.5024	84.6934
9130401M01Rik	450.87	410.078	557.779	427.034	624.59	485.831	479.964	460.991	541.339
9130404H23Rik	8.6232	17.9335	7.86612	14.022	0	0	1.13871	26.2982	0
9130409I23Rik	11.087	7.17338	4.29061	17.8462	5.92028	5.38814	8.54029	3.0939	11.3507
9230102K24Rik	0	0	0	0	0	6.28616	11.3871	0	0
9230104L09Rik	6.15943	326.389	31.4645	16.5715	20.721	23.3486	1.13871	24.7512	8.73127
9230105E05Rik	1.23189	3.58669	7.15102	10.1978	1.97343	5.38814	18.7886	9.28171	19.2088
9230110C19Rik	235.29	247.482	146.596	146.594	232.864	220.016	170.806	108.287	292.498
9230112J17Rik	93.6234	49.0181	112.271	54.8133	170.701	168.828	170.806	103.646	144.066
9230114K14Rik	91.1596	31.0847	50.0571	66.2859	51.3091	55.6774	37.5773	85.0823	79.4546
9230116N13Rik	57.8987	19.129	27.1739	28.044	29.6014	51.1873	37.5773	32.486	32.3057
9330020H09Rik	125.652	96.8407	122.282	72.6595	60.1895	63.7597	84.2642	95.911	65.4846
9330133O14Rik	356.015	418.447	440.503	309.759	242.732	307.124	288.662	354.252	364.967
9330151L19Rik	296.885	62.1693	130.864	172.088	190.436	171.522	116.148	258.341	124.857
9330158H04Rik	81.3045	44.2359	45.7665	54.8133	66.1098	27.8387	84.8336	95.911	86.4396
9330159F19Rik	78.8407	77.7116	55.7779	82.8574	37.4951	45.7992	35.2999	60.3311	83.8202
9330159M07Rik	65.29	109.992	87.2424	50.9891	63.1497	197.565	107.038	165.524	56.7533
9330175E14Rik	8.6232	2.39113	2.86041	3.82419	12.8273	3.59209	6.83223	3.0939	15.7163
9330175M20Rik	2.46377	0	0	0	13.814	0	0	1.54695	0
9330179D12Rik	1.23189	0	2.86041	5.09891	18.7476	33.2269	9.10964	13.9226	0
9330182L06Rik	20.9421	35.8669	58.6384	33.1429	34.535	99.6806	35.2999	15.4695	26.1938
9330182O14Rik	1.23189	0	2.14531	3.82419	0.986713	0.898023	0	1.54695	3.49251
9430008C03Rik	507.537	474.639	607.837	806.903	484.476	402.314	535.192	824.525	562.294
9430015G10Rik	369.566	114.774	220.966	500.968	348.31	165.236	97.3593	358.893	381.557
9430016H08Rik	519.856	575.066	514.158	410.463	490.397	537.916	408.795	394.472	446.168
9430018G01Rik	2.46377	35.8669	1.4302	29.3188	4.93357	6.28616	6.26288	32.486	20.9551
9430020K01Rik	422.537	258.242	208.095	258.77	179.582	763.32	282.399	422.318	357.109
9430021M05Rik	2.46377	19.129	0	5.09891	11.8406	15.2664	2.27741	9.28171	2.61938
9430023L20Rik	1076.67	1310.34	1759.87	1202.07	1628.08	1647.87	1591.34	1259.22	1223.25
9430037G07Rik	67.7537	51.4092	91.533	82.8574	71.0434	220.016	88.819	250.606	71.5964
9430038I01Rik	273.479	208.028	214.531	240.924	150.967	245.16	221.478	281.545	273.289
9430041J12Rik	1.23189	2.39113	3.57551	3.82419	3.94685	2.69407	2.27741	1.54695	0
9430060I03Rik	11.087	0	20.738	8.9231	6.90699	20.6545	1.70806	20.1104	12.2238
9430076C15Rik	0	7.17338	0	0	10.8538	6.28616	10.8177	0	1.74625
9430083A17Rik	109.638	124.339	51.4873	98.1541	116.432	83.5162	97.9287	54.1433	91.6784
9430091E24Rik	36.9566	23.9113	22.1682	15.2967	32.5615	57.4735	15.9419	44.8616	17.4625
9530003J23Rik	40.6522	37.0625	10.7265	49.7144	53.2825	31.4308	7.40159	24.7512	20.0819
9530008L14Rik	80.0726	135.099	212.385	145.319	0	8.98023	27.8983	157.789	198.2
9530026F06Rik	9.85509	4.78225	2.14531	10.1978	14.8007	9.87826	0	0	6.98502
9530026P05Rik	55.4349	57.3871	87.9575	71.3848	21.7077	23.3486	31.3144	116.021	57.6264
9530027J09Rik	4.92754	11.9556	3.57551	11.4726	1.97343	24.2466	11.3871	9.28171	6.11189
9530036O11Rik	131.812	57.3871	63.6441	66.2859	39.4685	39.513	48.9643	88.1762	103.902
9530048J24Rik	0	0	0	2.54946	11.8406	13.4703	2.27741	9.28171	1.74625
9530052E02Rik	9.85509	0	8.58122	16.5715	18.7476	9.87826	11.3871	9.28171	19.2088
9530053A07Rik	200.797	119.556	204.519	124.923	52.2958	145.48	145.754	136.132	185.976
9530059O14Rik	0	21.5201	3.57551	0	0	0.898023	47.2563	1.54695	18.3357
9530068E07Rik	4861.02	5317.87	4972.82	4549.51	6258.72	6085.01	6819.14	4650.13	3846.13
9530077C05Rik	186.015	125.534	110.841	172.088	235.825	198.463	191.303	156.242	200.819
9530080O11Rik	14.7826	14.3468	10.7265	6.37364	21.7077	7.18419	9.10964	12.3756	5.23876
9530082P21Rik	306.74	304.869	355.406	304.66	212.143	305.328	304.034	417.677	350.997
9530091C08Rik	152.754	66.9516	37.9004	67.5606	49.3357	71.8419	64.3369	112.927	113.507
9630028B13Rik	35.7247	2.39113	8.58122	2.54946	9.86713	6.28616	9.679	6.1878	9.6044
9630033F20Rik	114.565	145.859	144.451	105.802	50.3224	185.891	149.74	216.573	144.066
9830001H06Rik	622.103	560.719	330.377	662.859	290.094	202.055	142.908	372.815	363.221
9830107B12Rik	17.2464	28.6935	5.00571	7.64837	12.8273	17.9605	22.2048	27.8451	28.8132
9830132P13	28.3334	9.56451	5.72082	25.4946	12.8273	13.4703	13.0951	10.8287	26.1938
9830147E19Rik	383.117	223.57	263.873	390.067	108.538	176.013	376.912	433.146	247.968
9830166K06Rik	14.7826	5.97782	6.43592	20.3957	12.8273	27.8387	13.6645	20.1104	20.9551
9930005F22Rik	4.92754	8.36895	3.57551	17.8462	7.89371	17.0624	7.40159	30.939	22.7013
9930012K11Rik	546.957	383.776	642.877	656.485	447.968	501.097	695.749	583.2	709.853
9930013L23Rik	1.23189	1.19556	0.715102	0	0	0	1.70806	1.54695	4.36564
9930014A18Rik	364.638	289.326	198.798	420.66	264.439	270.305	120.133	321.766	276.781
9930021D14Rik	0	0	0	10.1978	0	0	0	0	12.2238
9930021J03Rik	757.61	633.649	746.566	594.024	580.188	480.442	437.263	566.184	634.764
9930023K05Rik	12.3189	21.5201	13.5869	8.9231	101.631	349.331	31.8838	27.8451	10.4775
9930104L06Rik	289.493	224.766	330.377	332.704	306.868	365.495	272.151	286.186	133.588
9930111J21Rik1	549.421	438.772	795.193	572.353	2032.63	1120.73	2558.1	1084.41	355.363
9930111J21Rik2	48.0436	44.2359	81.5216	62.4617	111.499	88.9043	146.893	26.2982	0
A030009H04Rik	107.174	96.8407	79.3763	105.802	102.618	156.256	28.4676	89.7232	105.648
A130010J15Rik	208.189	282.153	317.505	325.056	238.785	277.489	477.687	335.688	206.058
A130022J15Rik	635.653	480.617	715.102	633.54	575.254	827.079	912.672	716.238	602.458
A130040M12Rik	18675.4	54713.8	18966.6	14779.2	3302.53	6751.34	79157.1	28282.9	31050.2
A130049A11Rik	27.1015	9.56451	39.3306	21.6704	28.6147	58.3715	52.9498	29.3921	14.8432
A130077B15Rik	3795.44	1672.59	1627.57	3525.9	2332.59	2722.81	3121.76	4419.64	3544.02
A1cf	0	78.9072	20.0229	0	10.8538	0	0.569353	4.64085	0
A230001M10Rik	3.69566	0	2.14531	5.09891	2.96014	4.49012	2.27741	4.64085	2.61938
A230020J21Rik	0	3.58669	1.4302	1.27473	0	0	0	7.73475	5.23876
A230046K03Rik	1075.44	1753.89	1424.48	1727.26	1300.49	1606.56	1274.21	1546.95	1128.08
A230050P20Rik	383.117	237.917	215.961	373.495	498.29	426.561	439.54	323.313	221.774
A230051G13Rik	214.348	148.25	170.909	223.078	192.409	150.868	157.711	95.911	94.2978
A230056J06Rik	18.4783	1.19556	3.57551	22.9451	31.5748	2.69407	4.55482	26.2982	7.85815
A230056P14Rik	40.6522	11.9556	49.342	28.044	20.721	21.5526	29.037	10.8287	18.3357
A230057D06Rik	9.85509	2.39113	2.14531	14.022	4.93357	16.1644	5.12417	41.7677	2.61938
A230065H16Rik	7.39132	0	0	0	5.92028	7.18419	0	10.8287	4.36564
A230072C01Rik	508.769	225.962	341.819	365.847	375.938	437.337	299.48	499.665	433.944
A230072E10Rik	48.0436	11.9556	24.3135	21.6704	28.6147	38.615	35.8692	58.7841	29.6863
A230073K19Rik	57.8987	13.1512	22.8833	20.3957	23.6811	32.3288	47.8256	32.486	3.49251
A230077H06Rik	27.1015	13.1512	15.7322	29.3188	20.721	25.1447	18.2193	35.5799	27.9401
A230108P19Rik	1.23189	0	0.715102	1.27473	0	3.59209	1.13871	10.8287	1.74625
A2ld1	613.479	569.088	750.857	690.903	801.211	1016.56	1016.29	628.062	617.301
A2m	0	0	0	0	0	12.5723	0	0	0.873127
A330009N23Rik	70.2175	47.8225	63.6441	86.6815	97.6846	109.559	72.8772	103.646	88.1859
A330021E22Rik	240.218	90.8628	30.0343	202.682	41.442	115.845	90.5271	306.296	256.699
A330023F24Rik	72.6813	57.3871	55.0628	39.5166	63.1497	25.1447	30.1757	40.2207	1.74625
A330032B11Rik	110.87	66.9516	47.9118	122.374	103.605	90.7004	103.053	125.303	127.477
A330035P11Rik	62.8262	50.2137	14.302	29.3188	38.4818	19.7565	22.2048	18.5634	36.6714
A330040F15Rik	4.92754	14.3468	32.8947	7.64837	0.986713	5.38814	0.569353	26.2982	11.3507
A330041J22Rik	7.39132	35.8669	31.4645	29.3188	48.349	14.3684	34.1612	29.3921	31.4326
A330048O09Rik	0	7.17338	0	5.09891	1.97343	6.28616	0	0	0.873127
A330049M08Rik	230.363	242.699	257.437	158.066	262.466	353.821	54.6579	406.848	344.012
A330049N07Rik	11.087	9.56451	13.5869	7.64837	14.8007	3.59209	15.9419	15.4695	27.0669
A330050B17Rik	235.29	133.903	132.294	200.132	158.861	204.749	195.288	259.888	228.759
A330069E16Rik	289.493	198.464	185.926	305.935	197.343	185.891	254.501	312.484	295.117
A330076C08Rik	6.15943	2.39113	0	1.27473	2.96014	0	1.13871	0	1.74625
A330076H08Rik	12.3189	7.17338	22.1682	10.1978	5.92028	7.18419	5.69353	64.9719	13.97
A330102I10Rik	17.2464	13.1512	10.0114	25.4946	8.88042	8.08221	3.98547	13.9226	0
A3galt2	1.23189	0	1.4302	5.09891	0	16.1644	8.54029	1.54695	27.0669
A430005L14Rik	385.58	316.824	353.26	407.913	637.417	397.824	515.834	304.749	378.064
A430033K04Rik	225.435	247.482	205.949	201.407	315.748	309.818	249.946	361.987	174.625
A430035B10Rik	46.8117	50.2137	18.5926	48.4397	14.8007	26.9407	23.9128	44.8616	27.0669
A430071A18Rik	68.9856	5.97782	40.7608	24.2198	37.4951	29.6348	21.6354	55.6902	62.8652
A430078G23Rik	54.203	70.5383	61.4988	79.0332	58.2161	54.7794	70.0304	92.8171	91.6784
A430084P05Rik	14.7826	8.36895	9.29632	1.27473	18.7476	4.49012	121.272	0	47.1489
A430088P11Rik	12.3189	5.97782	2.86041	3.82419	10.8538	3.59209	4.55482	9.28171	3.49251
A430090L17Rik	9.85509	3.58669	0	6.37364	3.94685	6.28616	10.8177	10.8287	8.73127
A430093F15Rik	0	0	9.29632	0	0	0.898023	2.27741	0	0
A430105I19Rik	608.552	994.709	782.322	652.661	219.05	315.206	492.49	762.647	488.078
A430107O13Rik	4.92754	0	2.14531	10.1978	27.628	5.38814	38.1466	10.8287	0
A430107P09Rik	422.537	178.139	176.63	363.298	282.2	315.206	352.999	556.902	418.228
A430110N23Rik	0	0	0	0	0	0	5.12417	0	2.61938
A4galt	16.0145	1.19556	25.0286	7.64837	39.4685	59.2695	39.2853	10.8287	15.7163
A530006G24Rik	0	0	1.4302	2.54946	0	0	1.13871	7.73475	0.873127
A530013C23Rik	8.6232	0	0	6.37364	0.986713	1.79605	11.9564	0	0
A530032D15Rik	9.85509	9.56451	0.715102	1.27473	16.7741	0.898023	9.679	1.54695	10.4775
A530046M15	7.39132	0	0	0	8.88042	0	0	3.0939	0
A530050N04Rik	14.7826	3.58669	2.86041	11.4726	9.86713	15.2664	19.9273	20.1104	22.7013
A530054K11Rik	279.638	322.802	308.924	302.111	347.323	224.506	302.326	349.611	352.743
A530064D06Rik	25.8696	14.3468	158.038	70.1101	6.90699	27.8387	36.4386	52.5963	23.5744
A530065N20	30.7972	11.9556	12.1567	15.2967	9.86713	16.1644	13.6645	44.8616	14.8432
A530072M11Rik	25.8696	4.78225	15.7322	6.37364	2.96014	3.59209	1.13871	6.1878	6.11189
A530099J19Rik	3.69566	2.39113	0	0	0.986713	0.898023	2.27741	0	0
A630001G21Rik	133.044	76.5161	163.758	121.099	43.4154	64.6577	108.746	105.193	116.126
A630007B06Rik	1160.44	1120.24	1280.03	1029.98	815.025	876.471	895.023	1157.12	1023.31
A630010A05Rik	13.5507	0	2.14531	24.2198	15.7874	8.08221	20.4967	24.7512	16.5894
A630019I02Rik	0	1.19556	2.14531	15.2967	0	8.98023	0	0	10.4775
A630020A06	61.5943	40.6492	128.718	96.8794	158.861	101.477	93.3738	112.927	53.2608
A630023A22Rik	0	0	0	0	7.89371	7.18419	2.84676	0	10.4775
A630033H20Rik	1.23189	1.19556	1.4302	17.8462	4.93357	13.4703	47.8256	0	26.1938
A630055G03Rik	202.029	87.2762	90.1028	169.539	102.618	113.151	162.835	218.12	214.789
A630066F11Rik	50.5073	57.3871	62.929	70.1101	60.1895	73.6379	75.1546	63.425	55.007
A630071L07Rik	43.116	9.56451	0	15.2967	10.8538	0	0	13.9226	12.2238
A630072M18Rik	150.29	117.165	85.8122	127.473	100.645	141.888	123.55	176.352	97.7903
A630075F10Rik	186.015	66.9516	81.5216	170.814	148.007	152.664	161.127	259.888	192.088
A630077J23Rik	14.7826	0	0	17.8462	67.0965	1.79605	1.70806	4.64085	15.7163
A630089N07Rik	2214.93	1115.46	1025.46	2037.02	1535.33	1765.51	2410.07	2502.97	2222.11
A630095N17Rik	2.46377	5.97782	0	3.82419	0	14.3684	3.98547	3.0939	6.11189
A730008H23Rik	213.116	135.099	140.16	173.363	237.798	234.384	74.5852	196.463	135.335
A730011L01Rik	614.711	362.256	534.896	508.617	418.367	324.186	383.744	561.543	606.824
A730017L22Rik	712.03	356.278	365.417	590.199	495.33	555.876	625.719	866.293	681.913
A730020E08Rik	23.4058	8.36895	52.9175	71.3848	20.721	19.7565	35.8692	44.8616	27.9401
A730020M07Rik	7.39132	13.1512	2.14531	2.54946	8.88042	33.2269	21.6354	27.8451	8.73127
A730037C10Rik	32.029	8.36895	13.5869	24.2198	28.6147	27.8387	22.2048	43.3146	27.0669
A730043L09	22.174	7.17338	8.58122	22.9451	14.8007	10.7763	10.2483	20.1104	18.3357
A730069N07Rik	22.174	0	0	30.5935	0	0	0	6.1878	0
A730082K24Rik	50.5073	15.5423	18.5926	56.0881	21.7077	29.6348	31.8838	34.0329	27.0669
A730085A09Rik	7.39132	2.39113	0	11.4726	1.97343	2.69407	4.55482	10.8287	2.61938
A730085K08Rik	0	0	0	0	4.93357	3.59209	2.84676	0	0
A730090H04Rik	9.85509	15.5423	2.14531	10.1978	0.986713	0.898023	4.55482	0	11.3507
A730090N16Rik	0	0	16.4473	1.27473	0	0	3.41612	4.64085	4.36564
A730098P11Rik	172.464	210.419	224.542	165.715	295.027	317.002	354.137	241.324	192.961
A830007P12Rik	1882.32	2251.25	2421.34	2656.53	1836.27	1713.43	1842.43	2424.07	1585.6
A830010M20Rik	9.85509	54.9959	32.8947	54.8133	45.3888	44.9012	47.8256	47.9555	33.1788
A830018L16Rik	27.1015	14.3468	7.86612	44.6155	14.8007	33.2269	46.6869	29.3921	27.0669
A830052D11Rik	94.8552	47.8225	73.6555	117.275	55.256	108.661	83.6949	170.165	93.4246
A830060N17	4.92754	50.2137	37.9004	31.8682	21.7077	0	2.27741	9.28171	33.1788
A830080D01Rik	696.016	985.144	806.635	920.354	672.939	621.432	551.133	761.1	685.405
A830082K12Rik	50.5073	28.6935	21.4531	38.2419	57.2294	61.9636	48.395	80.4414	69.8502
A830082N09Rik	56.6668	17.9335	32.8947	65.0112	35.5217	23.3486	41.5628	71.1597	42.7832
A830093I24Rik	20.9421	27.498	0	3.82419	5.92028	0.898023	10.2483	15.4695	20.9551
A930001A20Rik	1.23189	0	0	0	9.86713	12.5723	0	0	9.6044
A930001C03Rik	61.5943	25.1068	40.0457	30.5935	23.6811	33.2269	32.4531	34.0329	35.7982
A930001N09Rik	1202.32	1603.25	1761.3	1369.06	1863.9	2199.26	1997.29	2153.36	1321.91
A930003A15Rik	8.6232	7.17338	7.86612	6.37364	0.986713	6.28616	18.7886	0	18.3357
A930004D18Rik	153.986	70.5383	244.565	216.704	72.0301	79.9241	65.4756	99.0049	109.141
A930005H10Rik	171.232	296.5	122.998	235.825	367.057	351.127	287.523	245.965	353.617
A930005I04Rik	20.9421	2.39113	7.86612	7.64837	9.86713	3.59209	0.569353	7.73475	0
A930007I19Rik	22.174	23.9113	16.4473	19.1209	7.89371	16.1644	15.3725	17.0165	20.0819
A930011O12Rik	0	1.19556	0	0	1.97343	1.79605	1.70806	4.64085	0
A930012L18Rik	17.2464	4.78225	5.00571	14.022	2.96014	0	5.69353	7.73475	26.1938
A930013F10Rik	29.5653	37.0625	23.5984	42.066	22.6944	41.3091	42.1321	46.4085	27.9401
A930015D03Rik	123.189	82.4939	47.9118	15.2967	88.8042	84.4142	34.7305	81.9884	11.3507
A930017M01Rik	0	0	0	0	0	0	18.2193	0	0
A930018P22Rik	3.69566	0	0	0	7.89371	6.28616	5.12417	0	0
A930019D19Rik	14.7826	1.19556	5.72082	7.64837	3.94685	17.0624	7.40159	15.4695	27.9401
A930024E05Rik	12.3189	14.3468	2.86041	24.2198	23.6811	20.6545	17.0806	32.486	25.3207
A930038C07Rik	3124.06	3738.53	7699.5	3233.99	4236.95	5794.05	7826.32	4006.6	2979.98
A930041C12Rik	0	4.78225	0	0	0	2.69407	0	4.64085	0
AA388235	89.9277	60.9737	45.7665	101.978	58.2161	119.437	90.5271	185.634	56.7533
AA415398	44.3479	64.5604	33.6098	38.2419	22.6944	29.6348	37.0079	41.7677	64.6114
AA465934	408.986	308.455	367.562	360.748	298.974	379.864	232.296	334.141	456.646
AA467197	88.6958	263.024	721.538	168.264	829.826	704.948	171.945	479.555	412.989
AA474331	9.85509	21.5201	20.0229	11.4726	27.628	16.1644	43.2708	7.73475	8.73127
AA536875	9.85509	3.58669	2.86041	11.4726	6.90699	4.49012	7.40159	15.4695	5.23876
AA543186	62.8262	29.8891	30.0343	16.5715	36.5084	18.8585	26.7596	32.486	34.9251
AA792892	0	5.97782	2.14531	2.54946	5.92028	3.59209	2.84676	0	6.11189
AA960436	643.045	793.854	608.552	572.353	614.723	493.913	696.888	714.691	732.554
AA986860	3584.79	2984.13	3487.55	3687.79	5463.43	5704.24	9961.96	3114.01	4192.76
AA987161	427.465	691.036	391.876	325.056	436.127	476.85	210.661	351.158	331.788
AB124611	18.4783	0	10.7265	12.7473	24.6678	13.4703	47.2563	13.9226	20.0819
AF251705	17.2464	0	18.5926	17.8462	74.0035	50.2893	290.939	0	135.335
AF357355	9.85509	1.19556	3.57551	8.9231	0.986713	0	0.569353	1.54695	6.11189
AF357425	9.85509	2.39113	4.29061	3.82419	3.94685	0.898023	1.13871	7.73475	5.23876
AF357426	3.69566	0	0	0	0.986713	0	0	3.0939	3.49251
AF366264	8.6232	5.97782	4.29061	7.64837	0	10.7763	9.679	0	16.5894
AI118078	6.15943	9.56451	0	29.3188	23.6811	67.3517	22.7741	35.5799	0
AI182371	24.6377	37.0625	30.0343	39.5166	8.88042	39.513	22.2048	27.8451	75.9621
AI197445	7.39132	2.39113	0.715102	11.4726	2.96014	6.28616	6.26288	9.28171	11.3507
AI314180	1207.25	1017.42	1563.21	1268.36	1536.31	1515.86	1321.47	1307.17	1457.25
AI314976	591.305	934.931	840.245	623.342	655.178	646.577	807.912	722.426	873.127
AI316807	417.609	469.857	476.258	358.199	672.939	677.11	499.322	454.804	551.817
AI317395	7.39132	8.36895	5.72082	19.1209	117.419	56.5755	42.7015	21.6573	96.044
AI413582	869.712	900.259	943.219	753.365	658.138	628.616	854.029	1073.58	716.838
AI414108	36.9566	16.7379	20.0229	35.6924	41.442	56.5755	9.10964	9.28171	30.5595
AI427809	32.029	4.78225	10.0114	20.3957	8.88042	11.6743	14.8032	15.4695	16.5894
AI428936	198.334	289.326	172.34	195.033	77.9504	94.2924	124.688	114.474	133.588
AI429214	200.797	314.433	213.1	203.957	206.223	140.092	280.122	165.524	156.29
AI450353	34.4928	33.4758	14.302	58.6375	24.6678	27.8387	21.6354	49.5024	20.0819
AI462493	781.016	848.85	844.535	641.189	425.274	627.718	353.568	671.377	751.763
AI463170	28.3334	86.0806	40.7608	16.5715	66.1098	90.7004	46.6869	40.2207	59.3727
AI464131	471.812	466.27	271.739	558.331	194.383	177.809	178.777	368.174	425.213
AI467606	551.885	902.651	775.886	771.211	488.423	396.028	390.007	946.734	727.315
AI480653	425.001	474.639	376.859	353.1	401.592	440.031	404.24	297.015	368.46
AI504432	0	0	12.8718	3.82419	22.6944	5.38814	67.1836	0	27.0669
AI506816	76.3769	33.4758	40.7608	99.4288	68.0832	74.5359	75.1546	92.8171	90.8053
AI507597	38.1885	35.8669	32.1796	20.3957	34.535	17.9605	21.0661	32.486	13.97
AI597468	671.378	987.536	624.284	840.046	641.364	662.741	409.934	645.079	766.606
AI597479	497.682	528.439	366.847	698.551	770.623	478.646	684.362	491.93	480.22
AI607873	34.4928	5.97782	21.4531	3.82419	25.6546	127.519	191.303	0	116.126
AI646023	2.46377	9.56451	2.14531	6.37364	0.986713	9.87826	6.83223	10.8287	13.0969
AI661453	301.812	290.522	201.659	188.66	265.426	383.456	190.733	442.428	269.796
AI662270	9.85509	5.97782	15.0171	11.4726	7.89371	21.5526	60.9207	17.0165	26.1938
AI747448	0	0	0	0	0	38.615	0	0	0
AI836003	12.3189	3.58669	23.5984	12.7473	1.97343	14.3684	5.69353	6.1878	14.8432
AI837181	455.798	625.28	545.623	346.726	381.858	446.318	421.321	467.179	332.662
AI846148	416.378	459.096	287.471	304.66	355.217	367.292	374.634	578.56	303.848
AI847159	19.7102	3.58669	0.715102	17.8462	3.94685	6.28616	0	3.0939	24.4476
AI848100	1217.1	1013.84	1165.62	1064.4	1240.3	1237.48	1345.38	1055.02	1101.89
AI848285	0	0	1.4302	1.27473	0.986713	4.49012	15.9419	0	0
AI987944	274.711	396.927	531.321	447.43	663.071	572.939	657.033	515.135	464.504
AK010878	493.986	414.861	414.759	604.221	385.805	210.137	275.567	454.804	402.512
AK129341	162.609	26.3024	65.7894	71.3848	92.7511	80.8221	53.5192	106.74	147.559
AU015836	0	3.58669	0	8.9231	0	0.898023	0	0	0
AU018091	49.2754	1.19556	86.5273	50.9891	0.986713	15.2664	0	40.2207	44.5295
AU019823	336.305	279.762	376.859	439.781	424.287	490.321	421.89	507.4	458.392
AU019990	18.4783	5.97782	2.14531	8.9231	5.92028	5.38814	18.2193	20.1104	16.5894
AU021034	218.044	89.6673	52.2024	260.045	145.047	86.2102	54.6579	208.838	191.215
AU021092	5871.17	2498.73	3730.69	4099.53	1569.86	1714.33	637.675	3049.04	3399.96
AU022252	246.377	176.943	215.961	235.825	201.29	174.217	189.594	207.291	199.073
AU022751	0	0	0	0	0	9.87826	0	0	0
AU022754	60.3624	22.7157	27.889	48.4397	20.721	73.6379	30.745	89.7232	52.3876
AU022793	8.6232	0	0	6.37364	14.8007	6.28616	33.0225	6.1878	25.3207
AU023762	50.5073	10.7601	20.738	66.2859	13.814	14.3684	47.2563	49.5024	65.4846
AU023871	40.6522	66.9516	28.6041	53.5386	264.439	235.282	300.618	75.8006	90.8053
AU040320	1547.25	1816.06	1553.2	1798.64	1692.21	1551.78	1866.34	1444.85	1421.45
AU040972	3407.4	875.153	1304.35	2713.9	1335.02	1804.13	1405.16	2854.12	3245.41
AU041133	232.826	196.072	189.502	265.144	300.948	227.2	138.922	232.043	337.9
AV039307	8.6232	5.97782	2.14531	7.64837	3.94685	6.28616	5.12417	1.54695	0.873127
AV051173	91.1596	51.4092	40.7608	52.2639	32.5615	26.0427	55.7966	52.5963	46.2758
AW011738	28.3334	9.56451	14.302	33.1429	18.7476	13.4703	11.3871	18.5634	49.7683
AW046200	6.15943	7.17338	8.58122	10.1978	16.7741	14.3684	13.6645	17.0165	13.0969
AW112010	1549.71	1010.25	1121.28	1209.72	1697.15	1325.48	964.484	2444.18	1968.03
AW146020	200.797	94.4495	93.6784	216.704	183.529	87.1083	179.915	150.054	119.618
AW146154	300.58	288.131	359.696	275.341	328.576	241.568	270.443	300.108	256.699
AW209491	587.61	785.485	589.959	712.573	747.929	487.627	425.876	544.527	465.377
AW549542	16.0145	2.39113	5.00571	8.9231	5.92028	4.49012	19.358	15.4695	10.4775
AW549877	1422.83	1352.18	1438.07	1929.94	1218.59	1121.63	1146.68	1138.56	997.111
AW551984	1.23189	0	0	0	0	14.3684	0	0	0
AW554918	177.392	136.294	100.114	155.517	193.396	66.4537	101.914	170.165	160.655
AW555464	4351.02	3584.3	4555.2	4675.7	2995.66	3101.77	3596.6	3816.33	3743.1
AY074887	60.3624	41.8447	30.7494	44.6155	65.1231	58.3715	57.5046	52.5963	54.1339
AY512931	55.4349	23.9113	22.1682	62.4617	26.6413	53.8814	71.7384	38.6738	45.4026
Aaas	349.856	642.018	528.46	462.727	481.516	529.834	699.165	624.968	609.443
Aacs	741.596	1018.62	787.327	848.969	508.157	614.248	578.462	878.668	683.659
Aadac	0	104.014	5.00571	5.09891	13.814	0	0	35.5799	0
Aagab	359.711	541.59	466.962	391.342	776.544	657.353	749.268	513.588	646.987
Aak1	883.262	701.796	987.556	987.915	711.42	726.501	795.955	884.856	821.613
Aamp	6275.23	7689.87	6029.02	6005.25	6826.08	5870.38	6465.57	5892.34	5583.65
Aanat	6.15943	2.39113	1.4302	6.37364	5.92028	4.49012	6.26288	3.0939	0.873127
Aard	1.23189	13.1512	12.8718	10.1978	0	0	0	72.7067	0
Aars	2126.24	2844.25	2567.93	3219.96	3516.65	2876.37	3462.23	2308.05	1739.27
Aars2	303.044	252.264	152.317	396.441	327.589	255.039	249.946	512.041	295.117
Aarsd1	686.161	351.496	506.292	650.112	430.207	321.492	452.635	533.698	653.972
Aasdh	234.058	139.881	208.095	356.924	288.12	208.341	146.893	430.052	209.551
Aasdhppt	625.798	899.064	622.139	711.299	878.175	692.376	638.814	815.243	739.539
Aass	432.392	789.072	276.744	466.551	884.095	129.315	141.769	191.822	466.25
Aatf	640.581	591.804	800.914	684.529	894.949	869.287	605.222	640.438	547.451
Aatk	0	0	1.4302	22.9451	11.8406	52.9834	169.667	7.73475	14.8432
Abat	0	106.405	27.889	6.37364	21.7077	18.8585	0	26.2982	24.4476
Abca1	369.566	439.967	594.25	503.518	823.906	1439.53	1319.76	566.184	628.652
Abca12	0	8.36895	0	0	0	0.898023	1.13871	0	12.2238
Abca13	0	0	0	0	5.92028	7.18419	0	4.64085	0
Abca14	0	2.39113	57.2082	11.4726	0	0	0	24.7512	13.97
Abca17	44.3479	16.7379	23.5984	7.64837	21.7077	1.79605	43.8402	24.7512	57.6264
Abca2	532.175	645.604	632.15	585.1	983.753	858.51	1114.22	657.454	619.92
Abca3	14576.9	13838.6	8900.16	14633.9	12195.8	8285.16	5931.52	8830	11909.5
Abca4	81.3045	102.818	106.55	71.3848	297.987	149.97	285.815	54.1433	115.253
Abca5	825.364	1391.64	1712.67	1147.26	1723.79	1605.67	1762.72	819.884	1257.3
Abca6	2.46377	3.58669	7.15102	10.1978	9.86713	28.7367	6.26288	12.3756	13.97
Abca7	947.321	1139.37	1444.51	1284.93	861.401	1457.49	1725.71	1002.42	871.381
Abca8b	35.7247	69.3427	12.8718	40.7913	21.7077	22.4506	31.3144	47.9555	44.5295
Abca9	0	25.1068	0	10.1978	14.8007	0	5.12417	3.0939	0
Abcb10	242.682	285.74	277.46	207.781	425.274	400.518	428.153	168.618	193.834
Abcb1a	264.856	1023.4	631.435	179.737	85.8441	220.914	60.9207	626.515	282.02
Abcb1b	120.725	1059.27	364.702	75.209	52.2958	226.302	73.4465	866.293	221.774
Abcb4	0	1.19556	1.4302	1.27473	0	9.87826	0.569353	3.0939	2.61938
Abcb6	496.45	327.584	353.26	467.825	229.904	378.068	432.139	453.257	541.339
Abcb7	372.03	396.927	442.648	424.485	642.35	622.33	516.972	358.893	487.205
Abcb8	1090.22	1009.06	656.464	958.596	1452.44	1163.84	1068.11	911.154	922.896
Abcb9	113.334	100.427	75.0857	67.5606	77.9504	109.559	75.7239	78.8945	45.4026
Abcc1	358.479	555.937	666.475	299.561	1226.48	1862.5	1267.38	945.187	427.832
Abcc10	234.058	269.002	238.129	289.363	459.808	299.042	146.324	154.695	221.774
Abcc2	0	0	5.00571	2.54946	0	0.898023	20.4967	0	0
Abcc3	1791.16	2792.84	3144.3	2354.42	2990.73	3017.36	2015.51	3647.71	2149.64
Abcc4	1015.07	1197.95	964.672	836.222	1517.57	1361.4	1204.18	1398.44	1158.64
Abcc5	2494.57	2042.02	2921.91	2476.8	3091.37	2448.91	4753.53	2011.04	1871.11
Abcc8	32.029	418.447	100.829	56.0881	276.28	210.137	170.806	264.529	83.8202
Abcc9	3.69566	1.19556	0	1.27473	0.986713	0.898023	14.8032	1.54695	0
Abcd1	724.349	596.586	559.925	761.013	772.597	831.57	1086.33	450.163	608.57
Abcd2	19.7102	26.3024	6.43592	20.3957	75.9769	82.6181	245.391	21.6573	156.29
Abcd3	3259.57	4386.52	4036.04	4139.04	4869.43	4552.08	4296.91	3616.77	3791.12
Abcd4	411.45	323.998	319.651	325.056	521.971	335.861	611.485	286.186	350.124
Abce1	2462.54	2680.45	2354.83	2629.77	2505.27	2709.34	2678.24	2530.81	2267.51
Abcf1	1573.12	1582.93	1489.56	1395.83	1536.31	1367.69	1300.4	1689.27	1486.94
Abcf2	1724.64	2208.21	1928.63	1913.37	2631.56	2356.41	2235.28	1859.43	1785.55
Abcf3	1052.03	1064.05	1167.05	878.288	1115.97	863	868.263	1045.74	843.441
Abcg1	61.5943	300.086	151.602	103.253	236.811	601.676	1416.55	123.756	369.333
Abcg2	224.203	350.3	130.149	193.759	110.512	175.115	158.849	245.965	323.057
Abcg3	0	0	2.86041	0	1.97343	0	23.3435	0	0
Abcg4	0	0	0	11.4726	0	0	22.7741	0	0
Abcg5	33.2609	40.6492	27.1739	6.37364	11.8406	35.9209	1.70806	7.73475	20.0819
Abcg8	0	0	5.72082	2.54946	1.97343	2.69407	0	0	0
Abhd1	400.363	233.135	243.85	219.253	254.572	264.917	330.794	241.324	357.982
Abhd10	231.595	185.312	298.198	230.726	371.004	262.223	215.215	255.247	207.804
Abhd11	1517.68	1592.49	1591.82	1358.86	1886.6	2044.8	2287.09	1602.64	1599.57
Abhd12	1153.05	1347.4	1790.62	1184.22	1023.22	1301.24	1967.11	929.717	1130.7
Abhd12b	247.609	21.5201	87.9575	164.44	32.5615	3.59209	25.6209	156.242	128.35
Abhd13	1145.65	1407.18	1385.15	1399.65	1229.45	1630.81	1471.78	1624.3	1179.6
Abhd14a	123.189	119.556	56.4931	150.418	349.297	387.946	194.149	91.2701	96.044
Abhd14b	523.552	84.885	80.0914	275.341	858.441	904.309	84.8336	75.8006	57.6264
Abhd15	29.5653	7.17338	9.29632	22.9451	6.90699	7.18419	121.272	12.3756	83.8202
Abhd16a	2049.86	2712.73	2245.42	1987.3	3119.99	2807.22	2888.33	2178.11	1913.02
Abhd16b	9.85509	7.17338	4.29061	6.37364	3.94685	26.9407	23.9128	7.73475	15.7163
Abhd2	2408.34	3097.71	3240.13	3439.22	2899.95	2608.76	3975.79	2507.61	2712.81
Abhd3	333.841	49.0181	58.6384	121.099	124.326	68.2498	301.757	199.557	251.461
Abhd4	3664.86	4634	4981.4	3689.06	2552.63	3268.8	3601.16	3901.41	3464.57
Abhd5	861.088	1345.01	1055.49	673.057	1286.67	945.619	1222.4	827.619	584.122
Abhd6	341.232	380.189	277.46	367.122	834.76	777.688	799.941	379.003	341.393
Abhd8	278.406	475.834	347.54	434.682	437.114	299.042	357.554	323.313	277.655
Abi1	1830.58	2423.41	2685.92	2221.85	2494.41	2198.36	2663.43	2060.54	1741.02
Abi2	522.32	542.786	514.158	543.034	462.769	477.748	434.416	550.715	750.016
Abi3	14.7826	16.7379	5.72082	6.37364	6.90699	73.6379	35.8692	1.54695	9.6044
Abi3bp	18.4783	4.78225	7.86612	8.9231	2.96014	1.79605	19.358	7.73475	2.61938
Abl1	975.654	1333.05	772.31	1031.26	792.331	925.862	942.279	1201.98	733.427
Abl2	485.363	453.119	364.702	449.979	551.573	689.682	462.314	586.294	598.965
Ablim1	296.885	246.286	60.0686	149.143	1296.54	2037.61	528.359	703.863	258.446
Ablim2	2.46377	38.258	31.4645	22.9451	15.7874	2.69407	7.97094	41.7677	24.4476
Ablim3	347.392	188.899	366.132	149.143	1033.09	1163.84	1605.01	637.344	300.356
Abo	3.69566	0	0.715102	0	0	13.4703	0	0	0
Abp1	112.102	47.8225	60.0686	233.275	23.6811	168.828	47.2563	145.413	185.103
Abr	1443.77	1501.63	1455.95	1519.48	1329.1	1406.3	2030.31	1542.31	1440.66
Abra	0	0	0.715102	0	0	0	0.569353	0	9.6044
Abt1	1075.44	830.917	883.151	1200.79	850.547	1000.4	1105.68	1290.16	1140.3
Abtb1	822.9	1091.55	1059.07	866.815	656.164	780.382	964.484	942.093	683.659
Abtb2	279.638	132.708	291.046	348.001	96.6979	235.282	191.303	159.336	196.454
Acaa1a	2940.51	3865.26	2917.62	2418.16	3337.07	3854.32	3749.19	2781.42	2463.09
Acaa1b	0	23.9113	5.00571	0	0	9.87826	81.9868	0	20.9551
Acaa2	5209.65	4270.55	4425.05	4117.37	5050	4007.88	4804.77	3590.47	4314.12
Acaca	869.712	349.105	692.934	1149.81	763.716	1020.15	1026.54	652.813	864.396
Acacb	272.247	139.881	185.926	168.264	204.25	356.515	158.28	139.226	130.096
Acad10	243.913	484.203	427.631	364.572	301.934	351.127	384.882	386.738	248.841
Acad11	443.479	704.187	423.34	379.869	484.476	460.686	627.427	447.069	382.43
Acad12	195.87	216.397	168.049	183.561	222.011	81.7201	162.835	100.552	61.992
Acad8	583.914	687.449	547.768	573.628	715.367	634.902	558.535	518.229	518.638
Acad9	1473.34	1447.83	1415.9	1709.41	1764.24	1638.89	1802.57	1977	1655.45
Acadl	4905.37	4942.46	4661.75	4459	5858.12	3065.85	3732.11	3791.58	4620.59
Acadm	1661.81	2328.96	2656.6	1978.38	1490.92	1617.34	1765.56	2202.86	2013.43
Acads	782.248	702.991	575.657	530.287	695.633	678.008	846.628	603.311	549.197
Acadsb	784.712	1437.07	1169.19	1044	1711.95	1639.79	1770.69	1076.68	1032.91
Acadvl	2182.9	2123.32	2050.91	1604.88	2463.82	2297.14	2465.3	1845.51	1948.82
Acan	32.029	2.39113	40.0457	1.27473	4.93357	140.99	1.70806	12.3756	48.8951
Acap1	19.7102	9.56451	43.6212	24.2198	0	1.79605	24.4822	12.3756	19.2088
Acap2	781.016	1011.45	1000.43	952.222	992.634	904.309	996.937	906.513	762.24
Acap3	418.841	411.274	361.126	400.265	322.655	201.157	383.744	318.672	302.102
Acat1	1663.05	2010.94	1779.89	1738.73	2466.78	2372.58	1470.07	1658.33	1608.3
Acat2	827.828	667.125	705.09	822.2	737.075	816.303	661.588	549.168	901.941
Acat3	13.5507	64.5604	19.3078	28.044	48.349	91.5984	47.2563	72.7067	12.2238
Acbd3	1764.06	2202.23	1482.41	1810.11	1888.57	1546.4	2190.87	1593.36	1860.63
Acbd4	624.566	680.276	866.704	597.848	714.381	1012.97	1014.02	782.757	594.6
Acbd5	1012.61	1481.3	1726.97	1316.79	1403.11	1472.76	1338.55	1282.42	1163.88
Acbd6	351.088	334.758	301.773	265.144	389.752	366.394	312.575	341.876	391.161
Acbd7	2.46377	21.5201	22.8833	0	3.94685	0	0	0	9.6044
Accn1	2.46377	0	0	0	17.7608	1.79605	7.40159	0	2.61938
Accn2	20.9421	19.129	16.4473	25.4946	39.4685	43.1051	79.14	41.7677	63.7383
Accn3	0	5.97782	0.715102	0	1.97343	15.2664	1.70806	0	2.61938
Accn5	0	9.56451	0	19.1209	0	0	0	0	11.3507
Accs	51.7392	19.129	70.08	100.704	65.1231	65.5557	122.98	116.021	109.141
Acd	661.523	755.596	494.135	550.683	530.852	685.192	450.927	652.813	668.816
Ace	203.261	610.933	306.064	191.209	507.171	1083.02	495.906	369.721	229.633
Ace2	309.203	940.909	439.073	360.748	361.137	309.818	222.617	388.285	539.593
Acer1	3.69566	0	4.29061	5.09891	3.94685	3.59209	3.98547	1.54695	9.6044
Acer2	72.6813	148.25	79.3763	50.9891	126.299	403.212	152.017	60.3311	71.5964
Acer3	1932.83	1428.7	2129.57	1555.17	1936.92	2703.05	2358.26	1853.25	1714.82
Ache	19.7102	25.1068	41.4759	34.4177	112.485	128.417	6.83223	12.3756	37.5445
Acin1	1137.03	894.282	885.296	1135.78	1189.98	875.573	1090.31	1104.52	1164.75
Acly	8857.26	11857.6	7986.26	9940.33	8736.36	7306.32	9361.3	6463.16	9249.91
Acmsd	27.1015	11.9556	27.889	48.4397	31.5748	53.8814	51.8111	24.7512	36.6714
Acn9	108.406	141.077	165.189	87.9563	106.565	106.865	151.448	106.74	102.156
Acnat1	501.378	610.933	315.36	623.342	601.895	585.511	540.885	614.14	619.92
Acnat2	0	0	8.58122	0	0	1.79605	0	0	0
Aco1	3794.21	4691.39	4816.21	4999.49	4441.2	3390.04	5776.65	3766.83	4472.16
Aco2	4176.09	4620.85	3974.54	4280.54	5727.87	5107.96	4969.31	3868.92	3616.49
Acot1	442.247	365.842	242.42	401.54	770.623	417.581	397.978	317.125	618.174
Acot10	0	0	2.14531	0	0	3.59209	2.27741	1.54695	0
Acot11	421.305	198.464	306.064	308.484	283.187	293.654	87.6803	317.125	343.139
Acot12	0	20.3246	6.43592	0	0	0	0	0	0
Acot13	996.596	851.241	1011.15	727.87	1197.87	1106.36	1300.97	759.553	949.963
Acot2	445.943	406.492	409.753	614.419	356.204	330.473	439.54	184.087	445.295
Acot3	1.23189	0	1.4302	6.37364	0	0	0	23.2043	12.2238
Acot4	0	0	0	0	0	9.87826	29.037	43.3146	17.4625
Acot6	3.69566	0	14.302	15.2967	25.6546	16.1644	9.10964	10.8287	2.61938
Acot7	2365.22	2101.8	1676.91	1612.53	1069.6	1356.02	840.934	1870.26	1982.87
Acot8	423.769	423.23	368.277	370.946	324.629	257.733	286.384	290.827	369.333
Acot9	1443.77	1457.39	2065.21	1680.09	2326.67	2520.75	2864.41	1666.07	1397
Acox1	2816.09	3239.98	3105.69	2355.7	3423.9	3361.3	3791.89	3469.81	2732.02
Acox2	396.667	384.972	544.193	413.012	130.246	229.894	116.148	587.841	399.019
Acox3	696.016	707.774	710.811	805.629	706.487	817.201	1084.05	703.863	657.465
Acoxl	618.407	133.903	92.2481	166.989	26.6413	42.2071	97.9287	293.921	418.228
Acp1	2495.8	2541.77	2633.01	2226.95	1985.27	2136.4	1928.97	2219.87	2886.56
Acp2	1087.76	1476.52	1465.24	1240.31	1878.7	1523.05	1685.85	974.579	903.687
Acp5	271.015	430.403	190.217	219.253	1559.01	1419.77	1689.84	371.268	596.346
Acp6	710.798	943.3	943.219	1111.56	741.022	426.561	643.369	801.321	713.345
Acpl2	272.247	327.584	281.035	223.078	440.074	539.712	138.922	293.921	348.378
Acpp	32.029	25.1068	60.0686	10.1978	34.535	57.4735	31.3144	17.0165	185.976
Acpt	6.15943	1.19556	0	2.54946	1.97343	0	0	3.0939	4.36564
Acr	0	0	0	0	0	6.28616	3.41612	0	0
Acrbp	75.1451	40.6492	92.9632	152.967	91.7644	64.6577	60.3514	117.568	99.5365
Acrv1	0	4.78225	0	0	0	0	0	6.1878	8.73127
Acsbg1	441.015	301.282	509.153	138.945	122.352	249.65	192.441	689.94	435.691
Acsf2	253.769	245.091	338.958	288.089	213.13	213.73	211.799	207.291	285.513
Acsf3	295.653	417.252	219.536	339.078	296.014	227.2	255.639	303.202	364.094
Acsl1	348.624	663.538	496.996	261.319	1599.46	2314.21	846.058	638.891	392.034
Acsl3	1919.28	3592.67	2791.04	2253.72	2036.58	1712.53	1831.04	2176.56	2271
Acsl4	6448.92	7749.64	6972.96	6819.8	6790.56	5908.99	6121.11	5364.83	6108.4
Acsl5	6687.91	9973.39	8752.85	6956.19	8989.95	7062.06	9363.01	7262.93	6611.32
Acsl6	7.39132	43.0403	31.4645	0	0.986713	12.5723	58.074	1.54695	5.23876
Acsm1	2.46377	0	0	10.1978	19.7343	13.4703	14.2338	10.8287	6.11189
Acsm2	59.1305	35.8669	22.8833	58.6375	27.628	37.717	38.716	68.0658	65.4846
Acsm3	1.23189	0	0	0	53.2825	88.0063	3.98547	0	1.74625
Acss1	1522.61	1350.99	1028.32	1576.84	1226.48	1021.95	735.034	1130.82	1355.97
Acss2	1092.68	1984.64	522.74	309.759	1681.36	814.507	346.166	525.963	653.099
Acss3	124.421	334.758	77.231	152.967	34.535	8.98023	34.1612	66.5189	111.76
Acta1	22.174	28.6935	11.4416	7.64837	16.7741	3.59209	10.2483	7.73475	9.6044
Acta2	2473.63	1164.48	1784.89	4353.2	45.3888	92.4964	67.753	1205.07	1705.22
Actb	165775	161663	191502	159935	202002	178692	236700	150732	164569
Actbl2	0	2.39113	6.43592	0	0	0.898023	0.569353	1.54695	0.873127
Actg1	75035.4	76363	77876	66391.7	89582.7	71333.6	92156	63298.1	70019.6
Actg2	4.92754	0	2.86041	0	0	0	1.13871	0	0.873127
Actl6a	1590.37	1795.74	1693.36	1601.06	1512.63	1375.77	1266.81	1520.65	1773.32
Actn1	1275	1300.77	1568.93	1242.86	1627.09	1642.48	2136.21	1443.31	1347.24
Actn2	0	2.39113	10.0114	5.09891	20.721	4.49012	2.84676	13.9226	6.98502
Actn3	1.23189	17.9335	0	0	0	0	0	0	0
Actn4	11642.6	15592.5	14247	15066	18905.4	18619.6	19987.7	11761.5	12290.1
Actr10	2472.4	2113.76	2575.8	2179.79	2488.49	2906	3040.91	2329.71	2511.99
Actr1a	1904.5	1718.03	1862.13	1740	2079.99	2259.43	2198.84	2079.1	2058.83
Actr1b	2306.09	2789.25	2659.46	2609.37	2905.87	2589.9	2596.82	2097.67	2296.33
Actr2	2482.25	2315.81	3054.2	2461.5	3054.86	3733.08	4309.43	3086.17	2169.72
Actr3	9256.39	11807.4	10536.3	11101.6	10096.1	7381.75	8307.43	7934.31	9567.73
Actr3b	0	0	10.0114	3.82419	0	7.18419	0	0	0
Actr5	312.899	259.437	288.901	252.396	290.094	232.588	380.897	351.158	370.206
Actr6	222.971	399.318	446.939	316.133	198.329	229.894	143.477	264.529	178.118
Actr8	837.683	1145.35	1357.98	1083.52	1043.94	1146.78	1094.3	1324.19	1036.4
Acvr1	295.653	221.179	384.01	215.429	286.147	259.529	313.713	306.296	370.206
Acvr1b	68.9856	98.0362	92.2481	93.0552	222.011	144.582	166.251	170.165	85.5665
Acvr1c	78.8407	176.943	31.4645	117.275	0.986713	0	23.3435	109.834	26.1938
Acvr2a	841.378	839.286	669.335	761.013	628.536	529.834	570.491	626.515	846.934
Acvr2b	113.334	182.921	113.701	89.231	94.7245	165.236	84.2642	142.319	116.126
Acvrl1	6.15943	7.17338	8.58122	38.2419	39.4685	260.427	195.288	9.28171	61.992
Acy1	152.754	410.078	297.482	158.066	310.815	374.476	397.978	247.512	259.319
Acy3	285.798	411.274	363.272	211.605	134.193	214.628	82.5561	267.623	258.446
Acyp1	206.957	219.984	251.001	160.616	177.608	160.746	149.74	128.397	216.536
Acyp2	86.232	150.641	180.206	142.77	93.7378	132.009	92.2351	99.0049	130.969
Ada	20.9421	0	5.72082	15.2967	29.6014	35.0229	17.0806	10.8287	32.3057
Adal	284.566	367.038	240.274	226.902	315.748	302.634	314.283	275.357	325.677
Adam10	1966.09	4392.5	3345.25	3001.99	6125.52	5851.52	6795.79	3510.03	2575.73
Adam11	51.7392	52.6048	12.8718	26.7693	26.6413	25.1447	0	46.4085	34.9251
Adam12	130.58	68.1471	82.2367	108.352	563.413	250.548	725.925	117.568	101.283
Adam15	1043.41	1058.07	771.595	1160	369.031	643.883	637.675	928.171	1065.22
Adam17	1821.96	1391.64	1513.87	2425.81	3373.57	2122.93	3884.69	1095.24	2180.2
Adam19	1772.68	577.457	661.469	1017.23	797.265	327.779	407.657	484.196	1337.63
Adam1a	71.4494	2.39113	25.0286	28.044	18.7476	40.411	57.5046	64.9719	6.11189
Adam1b	27.1015	7.17338	5.72082	42.066	3.94685	4.49012	20.4967	29.3921	10.4775
Adam21	3.69566	0	0	15.2967	0	0.898023	5.12417	0	0
Adam22	503.841	242.699	456.95	563.43	506.184	249.65	166.251	380.55	520.384
Adam23	0	0	0	0	0.986713	0	14.8032	0	2.61938
Adam28	307.972	781.899	428.346	151.693	3252.21	4361.7	914.381	2379.21	693.263
Adam3	0	0	0	0	0	0	13.0951	0	0
Adam30	7.39132	0	0	14.022	0	0	0	26.2982	4.36564
Adam32	6.15943	0	4.29061	7.64837	5.92028	3.59209	5.69353	0	0
Adam33	0	7.17338	0	0	0	16.1644	31.8838	0	11.3507
Adam4	11.087	13.1512	0.715102	26.7693	13.814	6.28616	4.55482	15.4695	5.23876
Adam5	22.174	0	0	0	24.6678	13.4703	0	0	0
Adam7	1.23189	14.3468	7.86612	0	0	3.59209	5.12417	15.4695	6.11189
Adam8	527.247	217.593	265.303	577.452	538.746	709.438	399.686	900.325	581.503
Adam9	4427.4	5776.96	6292.18	4719.05	6447.19	5551.58	6353.98	5497.86	3950.9
Adamdec1	8.6232	10.7601	0	0	35.5217	51.1873	41.5628	21.6573	35.7982
Adamts1	1271.31	1824.43	763.729	1152.35	2440.14	916.882	808.481	541.433	1426.69
Adamts10	939.929	872.762	517.734	748.266	578.214	411.295	458.898	838.447	789.307
Adamts13	0	3.58669	0	0	0	3.59209	1.70806	1.54695	0
Adamts14	0	0	0	0	0	2.69407	9.10964	0	0
Adamts15	8.6232	5.97782	3.57551	24.2198	173.662	234.384	14.8032	49.5024	5.23876
Adamts17	20.9421	26.3024	21.4531	2.54946	18.7476	20.6545	1.70806	10.8287	24.4476
Adamts18	6.15943	95.6451	32.8947	71.3848	1.97343	15.2664	24.4822	29.3921	107.395
Adamts2	0	1.19556	0	8.9231	5.92028	18.8585	23.9128	0	5.23876
Adamts20	9.85509	0	0	0	0	17.9605	0.569353	0	0
Adamts3	19.7102	2.39113	26.4588	0	1.97343	27.8387	11.3871	4.64085	4.36564
Adamts4	25.8696	19.129	12.1567	0	20.721	69.1478	5.69353	3.0939	24.4476
Adamts5	12.3189	1.19556	32.8947	15.2967	43.4154	60.1676	5.69353	21.6573	27.0669
Adamts6	195.87	182.921	70.7951	192.484	164.781	26.9407	30.745	139.226	277.655
Adamts7	9.85509	27.498	5.00571	8.9231	8.88042	2.69407	50.6724	35.5799	23.5744
Adamts8	6.15943	3.58669	0	1.27473	7.89371	14.3684	0	0	27.9401
Adamts9	548.189	292.913	202.374	327.605	371.991	52.0854	187.886	324.86	500.302
Adamtsl1	32.029	0	15.0171	10.1978	15.7874	82.6181	0	12.3756	20.9551
Adamtsl2	0	0	3.57551	15.2967	0	13.4703	0	0	18.3357
Adamtsl3	97.319	54.9959	25.7437	53.5386	98.6713	61.0656	0.569353	47.9555	59.3727
Adamtsl4	449.638	512.897	718.677	439.781	2237.87	2820.69	3655.81	728.614	647.861
Adamtsl5	306.74	325.193	396.166	313.583	267.399	442.725	395.7	383.644	392.034
Adap1	219.276	175.748	250.286	118.55	556.506	424.765	300.049	423.865	206.058
Adap2	17.2464	43.0403	17.8775	12.7473	4.93357	31.4308	78.5707	20.1104	27.0669
Adar	815.509	971.993	1156.32	934.376	1043.94	1023.75	1654.54	1048.83	881.859
Adarb1	25.8696	4.78225	1.4302	8.9231	53.2825	74.5359	67.1836	27.8451	55.007
Adarb2	3.69566	0	0	6.37364	32.5615	0	0.569353	7.73475	1.74625
Adat1	117.029	188.899	177.345	164.44	126.299	101.477	48.9643	202.651	154.544
Adat2	61.5943	106.405	66.5045	77.7584	101.631	252.345	154.295	108.287	49.7683
Adat3	139.203	150.641	126.573	165.715	141.1	164.338	167.39	176.352	119.618
Adc	928.842	209.224	437.642	201.407	218.064	479.544	342.75	188.728	602.458
Adck1	323.986	444.75	217.391	350.55	423.3	326.88	532.914	215.026	313.453
Adck2	452.102	433.99	553.489	429.584	521.971	361.903	400.255	388.285	480.22
Adck3	327.682	447.141	415.474	263.869	393.699	514.567	277.275	218.12	433.071
Adck4	1341.52	1349.79	1622.57	1133.23	1229.45	1866.99	1789.48	1333.47	1219.76
Adck5	696.016	769.943	590.674	657.76	482.503	577.429	698.026	637.344	515.145
Adcy1	0	0	15.0171	39.5166	0	11.6743	0	9.28171	66.3577
Adcy10	1.23189	0	6.43592	2.54946	0	0	0.569353	0	5.23876
Adcy2	1.23189	21.5201	5.00571	8.9231	8.88042	28.7367	35.2999	3.0939	11.3507
Adcy3	1153.05	998.296	1091.96	1134.51	1984.28	1467.37	2615.61	1356.68	1776.81
Adcy4	0	3.58669	17.8775	8.9231	0	39.513	31.3144	3.0939	16.5894
Adcy5	0	5.97782	19.3078	3.82419	4.93357	26.0427	14.8032	0	2.61938
Adcy6	591.305	848.85	600.686	873.189	700.567	437.337	326.239	663.642	680.166
Adcy7	1850.29	518.875	642.162	1188.05	1599.46	664.537	805.634	693.034	1712.2
Adcy8	6.15943	26.3024	37.1853	3.82419	0	13.4703	27.3289	20.1104	0
Adcy9	87.4639	98.0362	153.747	122.374	79.9238	179.605	54.0885	112.927	103.029
Adcyap1	274.711	680.276	376.144	289.363	541.706	307.124	401.394	583.2	283.766
Adcyap1r1	0	0	3.57551	3.82419	104.592	85.3122	1.70806	6.1878	0.873127
Add1	3478.85	5168.42	4367.13	3982.25	3855.09	4202.75	4528.06	3579.64	3301.29
Add2	66.5219	34.6713	137.3	34.4177	0	0	17.0806	24.7512	75.089
Add3	447.175	144.663	154.462	124.923	1060.72	1336.26	806.773	289.28	324.803
Adh1	8.6232	10.7601	40.0457	926.728	5.92028	26.0427	211.799	0	0
Adh5	2179.21	2717.52	2405.6	2466.6	2079.99	1958.59	2201.12	1895.01	2319.03
Adh7	24.6377	41.8447	43.6212	90.5057	128.273	208.341	105.33	40.2207	6.98502
Adhfe1	8.6232	51.4092	12.8718	0	26.6413	28.7367	8.54029	9.28171	2.61938
Adi1	4160.08	4485.76	4910.6	4416.93	3916.27	3216.72	3822.63	3471.36	4370.88
Adig	18.4783	10.7601	20.0229	25.4946	18.7476	13.4703	17.0806	35.5799	32.3057
Adipor1	7056.24	7014.37	7630.14	6392.76	6441.27	6064.35	7064.53	5847.47	5605.48
Adipor2	1821.96	1563.8	1796.34	1468.49	1162.35	1664.04	1725.14	1551.59	1710.46
Adk	3432.04	4506.08	4878.43	3731.13	3985.34	3015.56	4448.92	3013.46	3471.55
Adm	55.4349	118.361	73.6555	19.1209	158.861	310.716	81.4174	244.418	27.0669
Adm2	38.1885	58.5826	97.969	103.253	25.6546	25.1447	58.6433	54.1433	41.037
Adnp	1934.06	942.104	945.365	1264.53	1485.99	1000.4	1283.32	1788.28	1398.75
Adnp2	181.087	466.27	304.633	430.858	414.42	552.284	538.038	577.013	254.953
Ado	574.059	838.09	981.835	847.695	818.972	776.79	930.322	855.464	871.381
Adora1	884.494	1006.66	758.008	1083.52	189.449	114.947	207.244	1031.82	873.127
Adora2a	7.39132	0	0	0	0	6.28616	7.97094	0	6.11189
Adora2b	246.377	334.758	230.978	253.671	89.7909	239.772	179.346	266.076	331.788
Adora3	99.7828	66.9516	138.015	58.6375	24.6678	32.3288	39.2853	91.2701	103.902
Adpgk	263.624	450.728	358.266	386.243	366.071	443.624	300.049	315.578	291.625
Adprh	498.914	457.901	620.708	493.32	767.663	794.751	806.203	430.052	410.37
Adprhl1	19.7102	0	0	0	0	0	8.54029	27.8451	27.0669
Adprhl2	760.074	583.435	614.273	780.134	613.736	718.419	736.173	631.156	645.241
Adra1b	1.23189	7.17338	0	1.27473	18.7476	27.8387	6.26288	15.4695	7.85815
Adra2a	8.6232	14.3468	0	11.4726	20.721	17.0624	61.4901	18.5634	14.8432
Adra2b	18.4783	10.7601	30.7494	17.8462	10.8538	17.0624	11.3871	12.3756	21.8282
Adra2c	0	0	0	0	7.89371	50.2893	11.3871	0	0
Adrb1	206.957	84.885	178.06	184.836	120.379	168.828	103.053	201.104	195.581
Adrb2	1325.51	351.496	903.174	887.211	1142.61	1237.48	1263.96	1132.37	1408.35
Adrb3	1.23189	0	0	0	0.986713	0	11.9564	4.64085	0
Adrbk1	821.668	467.465	585.668	457.628	724.248	494.811	686.07	1024.08	806.77
Adrbk2	1687.68	1967.9	1258.58	1946.51	1515.59	959.089	1556.04	1704.74	2233.46
Adrm1	2777.9	2804.79	3097.11	2437.28	2683.86	3014.66	2956.08	2612.8	2871.72
Adsl	1493.05	1422.72	1674.77	1783.35	2307.92	1703.55	1763.85	1670.71	1431.06
Adss	3583.56	3128.79	4376.42	3652.1	3989.28	4710.13	4512.12	3711.14	3341.46
Adssl1	4142.83	2572.85	5987.55	4039.62	2541.77	3629.81	4147.73	2829.37	4246.89
Aebp1	803.19	468.661	859.553	546.859	129.259	225.404	344.458	405.301	676.674
Aebp2	1208.48	1425.11	1504.57	1544.97	1104.13	1163.84	1244.61	1390.71	1242.46
Aen	545.726	614.52	703.66	725.321	871.268	1113.55	974.732	626.515	508.16
Aes	6340.52	5980.21	6051.19	5949.16	5091.44	4887.94	5242.03	5186.93	4706.16
Afap1	502.61	488.986	676.486	535.386	217.077	284.673	501.6	474.914	363.221
Afap1l1	2064.64	1086.77	1659.04	1417.5	2000.07	1422.47	1937.51	1755.79	2176.71
Afap1l2	40.6522	17.9335	23.5984	12.7473	13.814	96.0885	19.9273	20.1104	5.23876
Aff1	1553.41	2275.16	1725.54	1601.06	1744.51	1755.64	1712.04	1336.57	1552.42
Aff2	6.15943	2.39113	50.0571	24.2198	8.88042	15.2664	38.716	1.54695	2.61938
Aff3	4.92754	1.19556	0	0	4.93357	5.38814	3.98547	1.54695	2.61938
Aff4	4252.47	3932.21	5342.53	5086.17	4837.86	5065.75	5780.07	5658.75	4297.53
Afg3l1	1801.02	1402.4	1656.89	1558.99	1640.9	1954.1	1795.74	1768.16	1582.98
Afg3l2	1733.26	1704.87	1355.12	1516.93	1454.42	1655.95	1451.85	1693.91	1314.06
Afmid	48.0436	92.0584	112.986	94.3299	174.648	304.43	222.617	134.585	134.462
Afp	617.175	1556.62	1440.22	1027.43	84.8574	146.378	284.107	1248.39	694.136
Aftph	1015.07	1321.1	1240.7	1186.77	1259.05	1272.5	1073.23	1209.72	1198.8
Aga	612.247	657.56	661.469	493.32	626.563	821.691	576.754	626.515	486.332
Agap1	595.001	732.881	995.422	978.992	668.005	783.076	896.161	832.26	547.451
Agap3	2144.71	2080.28	2208.95	1898.07	1672.48	1778.98	1886.83	2219.87	1929.61
Agbl2	220.508	96.8407	133.724	131.297	92.7511	59.2695	102.483	122.209	227.013
Agbl3	73.9132	47.8225	173.77	101.978	54.2692	89.8023	81.9868	60.3311	58.4995
Agbl4	0	0	0	2.54946	2.96014	3.59209	0	0	5.23876
Agbl5	359.711	484.203	236.699	326.331	298.974	306.226	265.888	242.871	338.773
Ager	41921.1	25862.4	44465.8	42123.4	14549.1	18881.8	29641.6	26544.1	42768.4
Agfg1	1538.63	2088.65	1555.35	1708.14	1347.85	1541.01	2073.01	1047.29	1684.26
Agfg2	406.522	249.873	402.602	409.188	429.22	327.779	434.416	447.069	343.139
Aggf1	1268.84	1079.59	997.567	1058.02	879.162	1127.92	1046.47	1019.44	1106.25
Agk	360.943	689.84	458.38	492.045	360.15	210.137	244.822	385.191	282.893
Agl	426.233	749.618	732.264	674.331	654.191	503.791	845.489	676.018	545.705
Agmo	29.5653	14.3468	15.7322	50.9891	5.92028	36.819	65.4756	18.5634	69.8502
Agpat1	448.407	460.292	531.321	466.551	468.689	431.051	452.066	423.865	647.861
Agpat2	979.35	1073.62	1110.55	906.332	1189.98	1085.71	1441.03	912.701	969.171
Agpat3	1990.73	1570.97	1582.52	1918.47	2053.35	1727.8	1840.15	1488.17	1905.16
Agpat4	184.783	455.51	297.482	326.331	1037.04	1264.42	431.569	422.318	252.334
Agpat5	543.262	771.139	859.553	971.343	783.451	486.729	532.914	807.508	705.487
Agpat6	2313.48	2846.64	3029.17	3329.59	2844.69	3046.1	2287.66	2563.3	2100.74
Agpat9	218.044	120.752	213.1	173.363	159.848	201.157	271.012	249.059	224.394
Agphd1	27.1015	47.8225	58.6384	26.7693	17.7608	29.6348	46.6869	9.28171	102.156
Agps	1940.22	2325.37	2028.74	2266.47	2701.62	1996.31	2070.74	2318.88	2141.78
Agr2	666.45	3030.75	378.289	622.068	762.73	1988.22	224.894	558.449	280.274
Agr3	87.4639	52.6048	16.4473	40.7913	22.6944	25.1447	27.8983	89.7232	62.8652
Agrn	3788.05	3328.45	4824.08	5476.23	2514.15	2951.8	4125.53	5301.4	3557.12
Agrp	8.6232	3.58669	7.15102	10.1978	3.94685	0	5.69353	1.54695	20.0819
Agt	18.4783	462.683	80.8065	65.0112	0	11.6743	25.0515	111.38	25.3207
Agtpbp1	814.277	608.542	647.882	875.739	993.62	572.041	564.229	547.621	956.948
Agtrap	691.088	420.838	464.816	428.309	518.025	597.185	740.728	573.919	685.405
Agxt	2.46377	0	1.4302	5.09891	0	5.38814	0	0	0
Agxt2l1	0	0	0	0	0	52.0854	0	0	0
Agxt2l2	389.276	316.824	311.069	350.55	293.054	253.243	395.131	382.097	385.049
Ahctf1	1056.96	1043.73	864.558	1347.39	1144.59	1288.66	1487.72	1270.05	956.075
Ahcy	862.32	1318.71	1463.81	1321.89	982.767	802.833	733.326	977.673	1342
Ahcyl1	3167.18	4459.45	4160.46	2985.41	3983.36	3807.62	6836.79	3661.63	3559.74
Ahcyl2	4008.56	6243.23	5750.85	4438.61	10722.6	7590.09	7048.59	3971.02	3857.48
Ahdc1	187.247	117.165	60.7837	132.572	118.406	100.579	82.5561	170.165	137.081
Ahi1	199.566	185.312	133.009	182.286	144.06	96.9865	214.077	123.756	178.118
Ahnak	8939.8	8965.53	11454.5	10137.9	13987.7	18723.8	18313.2	12423.6	10668.7
Ahr	1574.35	2296.68	2033.03	2318.73	1939.88	2131.01	1774.67	2277.11	2133.05
Ahrr	14.7826	0	20.738	3.82419	0	0	1.70806	23.2043	0.873127
Ahsa1	1683.99	2104.19	1984.41	1912.09	1739.58	1549.09	1675.61	1460.32	1840.55
Ahsa2	843.842	771.139	624.999	633.54	685.766	701.356	507.293	648.172	712.472
Ahsg	9.85509	323.998	24.3135	6.37364	0	0	4.55482	4.64085	0.873127
Aicda	0	0	0	0	0.986713	6.28616	2.84676	0	0
Aif1	0	0	0	0	0	6.28616	11.9564	1.54695	0
Aif1l	825.364	1438.26	944.65	945.849	199.316	378.966	446.373	573.919	761.367
Aifm1	1034.78	1087.96	970.393	1352.49	1117.95	1444.02	686.639	1048.83	1146.42
Aifm2	262.392	473.443	498.426	500.968	550.586	769.606	634.259	403.754	546.578
Aifm3	131.812	123.143	124.428	130.022	39.4685	32.3288	58.074	83.5353	68.9771
Aig1	1198.63	757.987	674.341	809.453	1121.89	1434.14	815.882	1420.1	866.142
Aim1	877.103	1023.4	1403.03	843.87	1362.65	1593.99	1438.19	1265.41	627.779
Aim1l	81.3045	87.2762	85.8122	89.231	13.814	24.2466	49.5337	58.7841	47.1489
Aim2	157.681	105.21	413.329	257.495	23.6811	72.7399	105.33	227.402	95.1709
Aimp1	517.392	687.449	595.68	484.397	457.835	543.304	424.168	575.466	571.025
Aimp2	1038.48	1073.62	1066.93	1145.98	811.078	960.885	868.832	968.391	831.217
Aip	1342.76	1512.39	1436.64	1320.62	999.541	1102.77	1237.77	1480.43	1167.37
Aipl1	1.23189	2.39113	0	0	10.8538	0	0.569353	9.28171	0
Aire	0	15.5423	0	0	0	0	0	0	0
Airn	188.479	98.0362	122.282	233.275	89.7909	115.845	128.104	151.601	151.051
Ak1	1966.09	5262.87	964.672	1022.33	1511.65	612.452	626.857	838.447	1803.88
Ak2	1511.52	1042.53	1134.15	1172.75	1501.78	1398.22	1138.71	1011.71	1368.19
Ak3	4130.51	4839.64	4305.63	3457.06	7937.12	7278.48	4336.19	5791.78	4291.42
Ak4	14.7826	46.627	274.599	131.297	118.406	87.1083	14.8032	81.9884	0.873127
Ak5	0	0	7.15102	1.27473	18.7476	76.332	17.6499	4.64085	0
Ak7	571.595	197.268	159.468	395.166	223.984	158.95	231.727	349.611	360.602
Ak8	107.174	39.4536	90.8179	91.7805	40.4553	75.434	61.4901	69.6128	217.409
Akap1	511.233	902.651	660.754	673.057	831.799	754.34	592.127	487.29	588.488
Akap10	465.653	534.417	597.825	472.924	459.808	601.676	556.258	603.311	515.145
Akap11	1244.21	1647.49	1373.71	1389.45	1395.21	1328.18	1458.11	1516.01	1446.77
Akap12	40.6522	49.0181	17.8775	73.9343	203.263	687.886	286.954	106.74	10.4775
Akap13	6017.76	5250.92	4534.46	5668.72	3330.16	4410.19	4571.33	5471.57	5766.13
Akap14	55.4349	11.9556	7.15102	7.64837	7.89371	25.1447	0.569353	13.9226	17.4625
Akap17b	83.7683	47.8225	88.6726	82.8574	48.349	77.23	97.9287	47.9555	77.7083
Akap2	108.406	45.4314	90.1028	44.6155	71.0434	423.867	149.17	83.5353	67.2308
Akap5	1010.15	1278.06	1779.89	2341.68	1523.49	1166.53	2652.05	1246.84	1619.65
Akap6	0	39.4536	0	2.54946	8.88042	26.9407	18.7886	12.3756	0
Akap7	657.827	352.691	518.449	750.815	818.972	361.903	278.983	419.224	815.501
Akap8	1451.16	1636.73	1869.28	1838.16	1783.98	1488.02	1908.47	2269.38	1666.8
Akap8l	1759.13	1353.38	1728.4	1711.96	1213.66	1336.26	1086.89	1843.97	1902.54
Akap9	2115.15	1547.06	1664.04	1840.71	1452.44	1386.55	1409.15	2083.74	1637.11
Akirin1	1469.64	827.33	1262.87	1402.2	1630.05	1576.93	2110.02	1361.32	1462.49
Akirin2	857.393	706.578	740.846	840.046	717.341	712.132	815.313	843.088	812.882
Akna	888.19	816.57	701.515	891.035	306.868	497.505	444.095	700.769	730.808
Aknad1	6.15943	5.97782	2.86041	2.54946	0	3.59209	1.13871	0	0
Akr1a1	13786	12129	13735.7	12614.7	14488.9	14035.2	15028.1	11582	13779.7
Akr1b10	443.479	316.824	391.876	418.111	234.838	254.141	239.698	371.268	491.571
Akr1b3	99.7828	98.0362	233.123	34.4177	189.449	266.713	208.952	0	47.1489
Akr1b7	0	0	10.0114	14.022	28.6147	31.4308	21.0661	4.64085	16.5894
Akr1b8	3859.5	3622.56	5664.32	3079.74	3328.18	3419.67	6650.61	5281.29	3569.34
Akr1c12	114.565	1131	753.717	462.727	96.6979	69.1478	52.9498	426.958	166.767
Akr1c13	556.813	2794.03	2500	1766.77	356.204	325.982	335.918	1777.45	804.15
Akr1c14	190.942	111.187	153.032	71.3848	335.483	165.236	216.354	191.822	302.102
Akr1c18	59.1305	202.05	207.38	95.6046	22.6944	15.2664	9.10964	354.252	56.7533
Akr1c19	983.045	2065.93	1820.65	1789.72	768.65	384.354	695.18	1214.36	1329.77
Akr1c20	3.69566	3.58669	5.72082	5.09891	5.92028	7.18419	1.13871	7.73475	5.23876
Akr1d1	38.1885	19.129	27.889	49.7144	20.721	23.3486	33.0225	57.2372	34.9251
Akr1e1	491.523	697.014	530.606	418.111	561.44	269.407	327.378	434.693	452.28
Akr7a5	1743.12	1190.78	1298.63	1561.54	1246.22	905.207	1035.08	1321.1	1436.29
Akt1	3922.33	1159.7	2877.57	1440.44	3546.25	2009.78	3430.92	3284.18	3223.59
Akt1s1	1109.93	1366.53	981.835	1138.33	1083.41	897.125	921.782	915.795	817.247
Akt2	2458.84	2138.86	1956.52	2369.72	2996.65	2622.23	2912.24	2202.86	2267.51
Akt3	101.015	243.895	332.522	233.275	172.675	325.084	140.63	142.319	213.043
Aktip	1669.21	1886.6	2141.73	1977.1	2016.84	1697.26	1813.39	2096.12	1795.15
Alad	2349.21	1685.74	1822.08	2151.74	1784.96	1510.48	1367.59	1580.98	2257.03
Alas1	3514.57	2747.41	2764.58	2437.28	4213.27	4637.39	4598.66	2841.75	3992.81
Alas2	0	0	0	6.37364	0	0.898023	6.26288	12.3756	0
Alb	373.262	12702.9	2553.63	1253.06	62.1629	31.4308	177.069	2618.99	675.801
Alcam	8091.03	6954.59	7387	6626.04	6734.32	7509.27	4182.47	6953.54	7086.3
Aldh16a1	708.335	619.302	642.877	852.793	719.314	650.169	952.527	676.018	900.194
Aldh18a1	1069.28	1180.02	1436.64	1488.88	1477.11	1136	834.671	918.889	1070.45
Aldh1a1	1968.55	1798.13	1995.85	1473.59	2934.49	3781.58	2582.58	2779.87	2153.13
Aldh1a2	0	52.6048	17.1624	0	34.535	387.946	11.3871	1.54695	66.3577
Aldh1a3	5728.27	2673.28	2890.44	2599.17	2260.56	1196.17	1281.04	2979.43	2780.91
Aldh1a7	1461.02	2681.65	997.567	1022.33	2438.17	1529.33	1573.69	1302.53	1865
Aldh1b1	0	0	0	3.82419	14.8007	19.7565	58.6433	0	16.5894
Aldh1l1	267.319	75.3205	62.929	86.6815	97.6846	165.236	146.324	21.6573	163.275
Aldh1l2	187.247	463.879	107.265	544.309	1.97343	104.171	111.024	160.883	156.29
Aldh2	6982.33	6968.94	5833.8	5824.24	8605.13	7918.77	5381.52	5219.41	5680.57
Aldh3a1	189.71	267.806	189.502	66.2859	774.57	1282.38	269.304	426.958	141.447
Aldh3a2	2218.63	3412.14	2891.16	2371	2113.54	1794.25	2467.57	2410.15	2257.91
Aldh3b1	2283.92	989.927	1566.07	1899.35	677.872	963.579	1013.45	1546.95	2139.16
Aldh3b2	30.7972	27.498	102.975	16.5715	16.7741	132.009	28.4676	32.486	93.4246
Aldh4a1	578.987	371.82	489.13	809.453	465.729	432.847	440.679	442.428	563.167
Aldh5a1	227.899	170.966	151.602	160.616	141.1	159.848	71.7384	129.944	111.76
Aldh6a1	1224.49	1310.34	1531.03	956.046	923.564	1456.59	996.937	809.055	1082.68
Aldh7a1	1475.8	1168.07	1119.13	1026.16	1199.84	1058.77	822.145	1175.68	1101.01
Aldh8a1	0	0	0	1.27473	0	0	5.12417	1.54695	0
Aldh9a1	1177.68	1535.1	978.259	1069.5	1152.48	875.573	1090.31	935.905	1187.45
Aldoa	25870.8	24723.1	32866.8	30407.4	20581.9	25295.5	30503.1	26544.1	24037.2
Aldoart1	20.9421	14.3468	15.7322	17.8462	14.8007	5.38814	22.7741	12.3756	17.4625
Aldob	0	0	0	0	0	0	22.7741	4.64085	0
Aldoc	252.537	610.933	605.691	353.1	551.573	1032.73	1025.97	488.836	679.293
Alg1	585.146	853.632	732.979	529.012	738.062	739.073	766.349	547.621	711.599
Alg10b	231.595	164.988	294.622	238.374	206.223	264.019	178.207	249.059	220.028
Alg11	822.9	907.433	675.771	703.65	829.826	963.579	670.698	637.344	592.854
Alg12	172.464	142.272	220.251	191.209	183.529	211.933	171.375	245.965	187.722
Alg13	72.6813	87.2762	116.562	87.9563	61.1762	140.092	55.2272	176.352	121.365
Alg14	400.363	698.209	363.272	392.616	681.819	457.094	411.073	340.329	414.736
Alg2	918.987	1070.03	977.544	1004.49	1389.29	985.132	882.497	758.006	1109.74
Alg3	510.001	425.621	564.931	532.837	537.759	422.071	534.622	468.726	606.824
Alg5	886.958	1556.62	1195.65	1019.78	1519.54	1569.74	1487.72	1276.23	1073.07
Alg6	216.812	181.726	213.1	200.132	453.888	347.535	228.88	156.242	231.379
Alg8	517.392	604.955	492.705	460.177	746.942	543.304	306.881	464.085	524.75
Alg9	575.291	634.844	542.762	629.716	996.581	610.656	913.242	487.29	425.213
Alk	96.0871	56.1915	25.7437	24.2198	128.273	37.717	17.0806	75.8006	12.2238
Alkbh1	479.204	252.264	393.306	602.947	364.097	353.821	399.116	465.632	518.638
Alkbh2	123.189	233.135	124.428	112.176	124.326	158.052	104.761	134.585	124.857
Alkbh3	510.001	536.808	726.544	540.485	577.227	618.738	803.357	739.443	746.524
Alkbh4	200.797	225.962	175.2	195.033	137.153	302.634	156.003	215.026	214.789
Alkbh5	2458.84	2273.96	2922.62	2699.88	2566.44	2650.07	2552.98	3011.91	2312.91
Alkbh6	891.886	1101.11	755.148	710.024	614.723	751.645	1013.45	792.039	818.994
Alkbh7	391.74	322.802	342.534	378.594	330.549	248.752	185.609	300.108	271.543
Alkbh8	262.392	400.514	204.519	336.528	202.276	438.235	263.041	125.303	151.051
Alms1	309.203	236.722	296.052	379.869	157.874	82.6181	97.9287	289.28	240.983
Alms1-ps2	11.087	0	0	0	0	2.69407	0	0	0
Alox12	54.203	99.2318	70.08	24.2198	16.7741	63.7597	10.2483	60.3311	54.1339
Alox12b	0	0	0	0	0	0	17.6499	0	0
Alox15	0	39.4536	24.3135	12.7473	0	35.0229	74.5852	13.9226	13.97
Alox5	1.23189	16.7379	15.7322	19.1209	47.3622	29.6348	366.663	0	147.559
Alox5ap	3.69566	8.36895	27.1739	33.1429	19.7343	132.907	449.789	37.1268	97.7903
Alox8	36.9566	7.17338	19.3078	25.4946	26.6413	34.1249	35.8692	57.2372	35.7982
Aloxe3	8.6232	15.5423	0.715102	6.37364	10.8538	12.5723	1.70806	7.73475	23.5744
Alpi	9.85509	63.3649	18.5926	0	7.89371	32.3288	0	0	0
Alpk1	554.349	615.715	586.384	567.254	468.689	750.747	803.357	761.1	628.652
Alpk2	49.2754	40.6492	53.6326	75.209	0.986713	0	0	58.7841	35.7982
Alpk3	2.46377	0	1.4302	12.7473	0	0.898023	10.2483	6.1878	0
Alpl	82.5364	20.3246	20.0229	15.2967	266.413	834.264	88.819	15.4695	77.7083
Alppl2	0	0	0	0	0	0	11.9564	0	0
Als2	482.899	460.292	389.015	520.089	609.789	539.712	591.557	406.848	385.922
Als2cl	968.263	747.227	1019.02	1165.1	1965.53	1547.29	1331.72	1294.8	807.643
Als2cr12	6.15943	0	0	2.54946	0	3.59209	1.13871	0	0
Als2cr4	272.247	428.012	298.198	305.935	303.908	179.605	186.748	298.562	326.55
Alyref	1257.76	1175.24	1114.84	1208.44	1680.37	1458.39	1597.03	1390.71	1484.32
Alyref2	91.1596	137.49	67.2196	81.5826	74.9902	69.1478	72.8772	120.662	94.2978
Amacr	266.087	454.314	275.314	295.737	406.526	314.308	182.193	244.418	228.759
Ambp	3.69566	2.39113	35.04	5.09891	11.8406	80.8221	0	15.4695	3.49251
Ambra1	646.74	584.631	720.108	679.43	712.407	783.974	628.565	541.433	400.765
Amd1	1993.19	2279.94	2960.52	2379.92	1739.58	1584.11	2496.61	2247.72	2176.71
Amd2	0	0	0	0	608.802	715.725	0	0	0
Amdhd1	0	0	0	0	1.97343	3.59209	5.69353	0	0
Amdhd2	1037.25	1189.59	1670.48	1312.97	272.333	506.485	368.941	1339.66	1130.7
Amfr	5356.24	5354.93	5846.67	5005.86	5941.99	5282.17	5802.84	5225.6	5043.18
Amhr2	72.6813	87.2762	124.428	66.2859	0	27.8387	32.4531	17.0165	123.984
Amica1	12.3189	15.5423	5.00571	6.37364	13.814	38.615	46.1176	21.6573	24.4476
Amigo1	219.276	248.677	140.16	220.528	454.875	220.914	305.742	210.385	129.223
Amigo2	230.363	185.312	234.553	121.099	283.187	209.239	127.535	29.3921	137.081
Amigo3	93.6234	25.1068	39.3306	130.022	37.4951	62.8616	133.229	88.1762	71.5964
Ammecr1	118.261	117.165	94.3935	152.967	282.2	352.025	228.88	128.397	248.841
Ammecr1l	1103.77	1426.31	1606.12	1442.99	1821.47	1277.89	1686.42	1008.61	1200.55
Amn1	628.262	637.235	657.179	504.793	781.477	583.715	493.059	547.621	406.877
Amot	168.768	321.607	456.95	305.935	231.878	132.009	197.565	275.357	252.334
Amotl1	772.393	945.691	728.689	748.266	546.639	465.176	739.02	617.233	606.824
Amotl2	627.03	1087.96	876.715	701.101	1280.75	1246.46	1359.61	903.419	651.353
Ampd1	0	7.17338	0	2.54946	3.94685	0	5.69353	0	5.23876
Ampd2	1371.09	1258.93	1255	1725.98	1343.9	870.185	1066.97	1140.1	1143.8
Ampd3	351.088	263.024	735.125	645.013	336.469	368.19	862	289.28	514.272
Amph	23.4058	383.776	47.1967	161.891	0	1.79605	11.9564	49.5024	79.4546
Amt	25.8696	34.6713	24.3135	17.8462	6.90699	0.898023	1.70806	17.0165	35.7982
Amy1	9.85509	8.36895	10.7265	3.82419	1.97343	36.819	5.12417	18.5634	1.74625
Amy2a2	3.69566	3.58669	5.72082	2.54946	3.94685	6.28616	4.55482	7.73475	2.61938
Amy2a3	3.69566	3.58669	5.72082	2.54946	3.94685	6.28616	4.55482	7.73475	2.61938
Amy2a4	3.69566	3.58669	5.72082	2.54946	3.94685	6.28616	4.55482	7.73475	2.61938
Amz1	1.23189	45.4314	45.0514	22.9451	0	76.332	236.281	13.9226	161.529
Amz2	609.784	552.35	554.919	488.221	688.726	367.292	602.375	580.107	623.413
Anapc1	1589.13	2266.79	1645.45	2070.16	2144.13	1634.4	2173.79	1692.36	1431.93
Anapc10	471.812	408.883	383.295	379.869	446.981	484.933	428.153	389.832	479.347
Anapc11	1153.05	967.211	1114.84	970.069	1241.29	1115.34	1111.38	866.293	1177.85
Anapc13	620.871	584.631	448.369	333.979	549.599	632.208	460.606	518.229	582.376
Anapc16	618.407	809.397	768.735	712.573	806.145	758.83	766.918	691.487	623.413
Anapc2	3109.28	3724.18	3236.55	3211.04	3134.79	3170.02	3683.14	3066.06	3282.96
Anapc4	2032.61	2207.01	1997.99	2073.98	2212.21	2024.14	1947.19	2001.75	1975.01
Anapc5	4794.5	4431.95	4558.06	4654.03	4397.78	3946.81	4154	4540.3	3878.43
Anapc7	813.045	828.526	800.199	920.354	987.7	877.369	757.808	742.536	894.956
Ang	1088.99	730.489	501.286	773.76	806.145	280.183	264.749	349.611	929.008
Ang2	0	0	0.715102	0	10.8538	6.28616	0	0	5.23876
Ang3	0	54.9959	45.7665	0	0	0	0	24.7512	210.424
Ang4	0	21.5201	6.43592	0	3.94685	1.79605	0	1.54695	85.5665
Ang6	0	8.36895	5.72082	0	0	0	0	1.54695	27.0669
Angel1	107.174	156.619	143.735	109.627	134.193	113.151	242.544	108.287	95.1709
Angel2	858.625	915.802	1285.04	987.915	1217.6	1095.59	896.731	843.088	808.516
Angpt1	6.15943	0	5.00571	10.1978	0.986713	39.513	0	0	17.4625
Angpt2	2.46377	45.4314	60.0686	66.2859	13.814	72.7399	15.3725	51.0494	13.0969
Angptl1	1.23189	5.97782	1.4302	17.8462	16.7741	1.79605	1.70806	32.486	8.73127
Angptl2	464.421	300.086	534.896	330.155	1471.19	1219.52	2697.59	550.715	433.071
Angptl3	1.23189	0	2.14531	6.37364	3.94685	1.79605	10.2483	10.8287	10.4775
Angptl4	2108.99	3504.2	3587.67	1955.43	7507.9	6377.76	10453.9	4167.49	2212.5
Angptl6	30.7972	77.7116	75.0857	122.374	85.8441	27.8387	96.79	68.0658	20.0819
Angptl7	48.0436	10.7601	11.4416	33.1429	17.7608	61.9636	93.9432	37.1268	96.9171
Ank	643.045	1532.71	1782.03	451.254	642.35	1100.08	539.177	1531.48	1169.99
Ank1	45.5798	92.0584	127.288	81.5826	25.6546	124.825	37.5773	129.944	55.8802
[truncated: 15,382 more rows]

## Sheet: KPS_v_KP_DESeq2_enrichment
Gene	baseMean	log2FoldChange	lfcSE	stat	pvalue	padj
0610005C13Rik	3.56837	0.833693	1.56233	0.533623	0.593602	0.814193
0610007C21Rik	1554.29	0.271968	0.237915	1.14313	0.252984	0.522887
0610007L01Rik	2692.91	0.545461	0.120831	4.51423	6.35472e-06	0.000192297
0610007N19Rik	131.516	-0.489905	0.646878	-0.757337	0.448848	0.712508
0610007P08Rik	630.432	-0.188646	0.179412	-1.05147	0.293044	0.568549
0610007P14Rik	933.225	-0.216894	0.191692	-1.13147	0.257858	0.528612
0610007P22Rik	457.149	0.0829801	0.215872	0.384395	0.700686	0.875761
0610008F07Rik	4.09108	0.996541	1.79737	0.554444	0.579275	0.804706
0610009B14Rik	24.0695	-2.23943	1.17488	-1.90609	0.0566382	0.208121
0610009B22Rik	584.273	-0.091897	0.204906	-0.448483	0.653804	0.849128
0610009D07Rik	1788.89	0.102689	0.178323	0.575859	0.564711	0.794271
0610009L18Rik	58.5323	-0.364542	0.396027	-0.920499	0.357312	0.634535
0610009O20Rik	153.994	0.109155	0.310593	0.351439	0.725259	0.887177
0610010B08Rik	468.838	-0.275209	0.200901	-1.36987	0.170728	0.415452
0610010F05Rik	802.549	0.469225	0.211772	2.21571	0.0267117	0.126765
0610010K14Rik	479.595	0.587012	0.17597	3.33585	0.000850376	0.00991607
0610010O12Rik	3933.72	0.493578	0.149707	3.29697	0.000977333	0.0110406
0610011F06Rik	1334.65	-0.386053	0.163726	-2.35792	0.0183777	0.0973435
0610011L14Rik	848.568	-0.0358849	0.229047	-0.156671	0.875505	0.952468
0610012G03Rik	902.576	0.04495	0.142548	0.315333	0.752509	0.899428
0610030E20Rik	802.491	-0.24721	0.237391	-1.04136	0.297708	0.573821
0610031J06Rik	3470.27	0.0951965	0.177844	0.53528	0.592456	0.81354
0610037L13Rik	631.98	0.163974	0.250185	0.65541	0.512204	0.758523
0610037P05Rik	1005.93	0.169927	0.219405	0.774489	0.438642	0.704907
0610038B21Rik	7.84566	-0.699949	1.13644	-0.615915	0.53795	0.776931
0610038L08Rik	3.09556	-0.607388	2.36318	-0.257021	0.797163	NA
0610039K10Rik	3.72951	0.181931	1.33358	0.136424	0.891486	0.95877
0610040B10Rik	20.2216	0.631577	0.74211	0.851056	0.394738	0.669264
0610040F04Rik	6.68686	0.481449	1.69236	0.284483	0.77604	0.908005
0610040J01Rik	2225.32	1.1636	0.228702	5.08786	3.62134e-07	1.67075e-05
0610043K17Rik	1.198	-1.90496	2.71395	-0.701914	0.482733	NA
0910001L09Rik	871.5	-0.437599	0.186505	-2.34631	0.0189602	0.0996663
100043387	16.181	2.32587	2.10362	1.10565	NA	NA
1100001G20Rik	184.124	3.24774	0.754115	4.30669	1.65718e-05	0.000421663
1110001A16Rik	449.951	0.163553	0.204888	0.798257	0.424721	0.693434
1110001J03Rik	431.474	-0.0105018	0.177225	-0.0592568	0.952748	0.983517
1110002B05Rik	1623.6	0.43185	0.235475	1.83395	0.0666615	0.231468
1110002L01Rik	145.509	-0.240515	0.439984	-0.546645	0.584623	0.809247
1110002N22Rik	218.416	-0.207727	0.295023	-0.704105	0.481367	0.735795
1110003E01Rik	4180.12	0.62241	0.217449	2.86232	0.00420553	0.033597
1110004E09Rik	764.629	0.0496517	0.22746	0.218288	0.827205	0.932245
1110004F10Rik	2444.03	0.330298	0.130355	2.53383	0.0112825	0.0691811
1110005A03Rik	261.47	0.57253	0.305106	1.87649	0.0605874	0.217396
1110006O24Rik	28.7567	-0.442042	0.626362	-0.705729	0.480357	0.735177
1110007C09Rik	1124.33	0.0413056	0.193338	0.213645	0.830824	0.934046
1110008F13Rik	3622.51	-0.481675	0.167454	-2.87645	0.0040217	0.0325038
1110008J03Rik	171.291	-0.192634	0.290239	-0.663708	0.506877	0.754065
1110008L16Rik	354.639	-0.327743	0.220769	-1.48456	0.137662	0.366844
1110008P14Rik	833.281	-0.622892	0.242746	-2.56602	0.0102873	0.065081
1110012J17Rik	2126.59	-0.68615	0.198065	-3.46427	0.000531666	0.00675381
1110012L19Rik	455.897	-0.288364	0.234635	-1.22899	0.219077	0.480376
1110014N23Rik	1235.56	-0.152881	0.140806	-1.08576	0.277586	0.552016
1110017D15Rik	213.118	-0.587489	0.456684	-1.28642	0.198296	0.45388
1110017F19Rik	146.825	1.2328	0.43518	2.83284	0.00461358	0.0359796
1110018G07Rik	696.303	-0.38174	0.155537	-2.45434	0.0141143	0.080725
1110018J18Rik	660.128	-0.631966	0.237205	-2.66421	0.00771688	0.0525137
1110019D14Rik	70.5649	-0.231856	0.564707	-0.410578	0.681382	0.865222
1110020A21Rik	41.4472	-0.477718	0.525313	-0.909397	0.36314	0.640228
1110020G09Rik	666.671	-0.627918	0.316014	-1.987	0.0469228	0.183978
1110021J02Rik	381.402	-0.232032	0.202406	-1.14637	0.251643	0.521469
1110021L09Rik	501.438	-0.666045	0.255041	-2.61152	0.00901405	0.0588917
1110028C15Rik	433.831	-0.40819	0.298245	-1.36864	0.171112	0.415941
1110028F11Rik	6.49537	0.791848	1.31753	0.601009	0.547834	0.783387
1110028F18Rik	6.08668	1.09431	1.48235	0.738227	0.460376	0.721383
1110031I02Rik	543.454	0.383587	0.229821	1.66907	0.0951036	0.291725
1110032A03Rik	608.312	0.591444	0.21875	2.70374	0.00685636	0.0483744
1110032A04Rik	497.18	-1.15251	0.367859	-3.13304	0.00173009	0.0172345
1110032F04Rik	14.4393	2.20968	1.54586	1.42942	0.152885	0.390856
1110034A24Rik	373.26	-0.310667	0.228102	-1.36196	0.173209	0.418575
1110034B05Rik	274.562	0.340804	0.294401	1.15762	0.247021	0.515488
1110034G24Rik	122.192	0.458111	0.482182	0.95008	0.342072	0.619779
1110036E04Rik	1.54979	0.425979	2.45904	0.173229	0.862471	NA
1110037F02Rik	725.946	0.0525712	0.223437	0.235284	0.813988	0.925777
1110038B12Rik	374.42	-0.227679	0.233265	-0.976054	0.329038	0.607011
1110038D17Rik	527.862	0.192283	0.20374	0.943765	0.34529	0.622633
1110038F14Rik	426.769	0.0656944	0.16286	0.403379	0.68667	0.868403
1110046J04Rik	132.909	0.865212	0.445121	1.94377	0.0519233	0.196824
1110049F12Rik	829.345	-0.122938	0.217063	-0.56637	0.571142	0.799127
1110050K14Rik	9.09972	2.52193	1.32821	1.89874	0.0575981	0.210412
1110051M20Rik	556.41	0.453694	0.207347	2.18809	0.0286632	0.132242
1110054M08Rik	84.1754	0.0361479	0.401151	0.0901104	0.928199	0.974227
1110054O05Rik	436.328	0.46945	0.201414	2.33077	0.0197656	0.102746
1110057K04Rik	898.058	-0.293113	0.193866	-1.51194	0.13055	0.354662
1110058L19Rik	576.041	-0.398412	0.272259	-1.46336	0.14337	0.376447
1110059E24Rik	1109.77	0.0234174	0.189402	0.123639	0.901601	0.963269
1110059G10Rik	310.456	0.673361	0.225139	2.99087	0.00278188	0.024545
1110065P20Rik	362.386	0.124775	0.198381	0.628967	0.529371	0.770976
1110067D22Rik	469.363	0.916095	0.202139	4.532	5.84287e-06	0.000178848
1190002F15Rik	41.7466	-0.025238	0.824126	-0.030624	0.975569	0.992087
1190002H23Rik	10127.9	0.0967428	0.341882	0.282971	0.777199	0.908154
1190002N15Rik	319.689	-0.789678	0.352837	-2.23808	0.0252155	0.122011
1190003J15Rik	456.549	-1.57859	0.363359	-4.34443	1.39638e-05	0.000366164
1190005F20Rik	469.161	-0.275605	0.255627	-1.07815	0.280965	0.555596
1190005I06Rik	36.6643	-0.0553127	0.58463	-0.0946114	0.924623	0.973169
1190007F08Rik	611.832	-0.16511	0.275329	-0.599681	0.548719	0.783736
1190007I07Rik	160.622	0.110746	0.273452	0.404992	0.685483	0.867841
1200009I06Rik	46.4481	-1.86119	0.489952	-3.79872	0.000145448	0.00243694
1200011I18Rik	945.721	0.584804	0.178188	3.28196	0.00103088	0.0115148
1200011M11Rik	618.621	-0.0495671	0.251056	-0.197434	0.843488	0.939743
1200014J11Rik	744.193	-0.0179447	0.224978	-0.079762	0.936427	0.977138
1200016B10Rik	1278.97	-0.716188	0.158825	-4.50929	6.50461e-06	0.000195716
1300001I01Rik	1962.25	0.0317215	0.200515	0.1582	0.874299	0.951862
1300002E11Rik	529.274	0.247937	0.21263	1.16605	0.243596	0.511721
1300002K09Rik	31.7245	0.592999	0.768996	0.771134	0.440628	0.706576
1300010F03Rik	768.753	0.276958	0.277789	0.997008	0.318761	0.595856
1300014I06Rik	1362.76	0.172604	0.313802	0.55004	0.582292	0.807206
1300015D01Rik	1.89763	2.23869	2.38888	0.937128	0.348693	NA
1300017J02Rik	1.50642	1.32438	2.98462	0.443735	0.657234	NA
1300018I17Rik	509.361	-0.132846	0.166305	-0.79881	0.4244	0.692981
1300018J18Rik	1054.3	-0.29278	0.217572	-1.34566	0.178411	0.42556
1500001M20Rik	432.056	-0.533248	0.237939	-2.24111	0.025019	0.121475
1500002O10Rik	24.804	-2.04097	1.03603	-1.96999	0.0488396	0.188822
1500002O20Rik	351.445	0.379575	0.210725	1.80129	0.0716578	0.242864
1500003O03Rik	3850.45	0.35791	0.237472	1.50716	0.131768	0.357179
1500004A13Rik	64.3765	-0.0605681	0.547749	-0.110576	0.911952	0.967251
1500009C09Rik	1.49867	3.3157	3.65457	0.907274	0.364262	NA
1500009L16Rik	20.114	-0.917021	0.860036	-1.06626	0.286307	0.562083
1500010J02Rik	669.766	0.237213	0.199003	1.19201	0.233259	0.498627
1500011B03Rik	697.375	0.431097	0.297385	1.44963	0.147163	0.382289
1500011H22Rik	786.453	-0.496862	0.266901	-1.8616	0.0626596	0.222177
1500011K16Rik	364.94	-0.323204	0.198736	-1.6263	0.103886	0.308534
1500012F01Rik	625.634	-0.62928	0.197838	-3.18079	0.00146877	0.0151954
1500012K07Rik	44.7212	-0.176781	0.563391	-0.313781	0.753687	0.899958
1500015A07Rik	107.737	-0.499907	0.465434	-1.07407	0.282793	0.557356
1500015L24Rik	12.1663	2.6514	1.62606	1.63057	0.102981	0.30684
1500015O10Rik	43.1635	-0.331461	0.607819	-0.545328	0.585528	0.809614
1500016L03Rik	4.01557	-0.452909	1.25299	-0.361463	0.717753	0.883237
1500017E21Rik	4.36641	0.0159079	2.51128	0.00633459	0.994946	0.998459
1500031L02Rik	471.864	-0.274367	0.228111	-1.20278	0.229063	0.492835
1500032L24Rik	1946.16	-0.133551	0.154977	-0.861752	0.388824	0.663761
1520402A15Rik	121.646	0.00514362	0.372557	0.0138063	0.988985	0.996163
1600002D24Rik	2.21302	-2.27226	3.11329	-0.72986	0.465476	NA
1600002H07Rik	166.141	-0.711236	0.280598	-2.53472	0.0112539	0.0691614
1600002K03Rik	213.471	0.00609488	0.33899	0.0179795	0.985655	0.995506
1600010M07Rik	12.6385	0.398632	1.18467	0.336493	0.736499	0.893389
1600012F09Rik	1703.15	-0.0357238	0.191813	-0.186243	0.852254	0.943212
1600012H06Rik	1263.48	0.16291	0.153927	1.05836	0.289892	0.565536
1600014C10Rik	262.608	-0.15428	0.187533	-0.822682	0.410689	0.682494
1600014C23Rik	6.19479	2.17017	1.4332	1.51421	0.129972	0.353878
1600016N20Rik	155.128	0.404938	0.413178	0.980055	0.327059	0.605041
1600020E01Rik	311.877	-0.161896	0.197552	-0.819512	0.412495	0.683711
1600021P15Rik	37.95	0.969085	0.973909	0.995047	0.319714	0.596726
1600027N09Rik	233.213	0.213188	0.245563	0.868161	0.385306	0.660612
1600029D21Rik	2252.35	-0.794385	0.657924	-1.20741	0.227274	0.491043
1600029I14Rik	52.2598	-0.40951	0.690001	-0.593491	0.552853	0.786314
1600029O15Rik	24.5857	-0.226638	0.677241	-0.33465	0.737889	0.893389
1700001C02Rik	93.8346	-0.131629	0.60522	-0.21749	0.827826	0.93263
1700001C19Rik	4.37813	2.70506	1.68502	1.60536	0.108415	0.316515
1700001D01Rik	5.30148	-0.377909	1.24055	-0.30463	0.760648	0.902311
1700001G17Rik	8.78266	-2.19755	1.07968	-2.03538	0.0418131	0.170171
1700001J11Rik	14.9523	-1.26734	1.27698	-0.99245	0.320978	0.598006
1700001K19Rik	3.30453	0.518394	2.21022	0.234545	0.814562	NA
1700001L05Rik	63.3678	0.022798	0.424268	0.053735	0.957146	0.985076
1700001L19Rik	84.5454	-0.103095	0.56515	-0.182421	0.855252	0.944234
1700001O22Rik	14.2611	0.474884	0.796697	0.596066	0.551131	0.78529
1700001P01Rik	3.14299	-1.05109	2.0272	-0.518492	0.604115	NA
1700003D09Rik	2.35986	1.15248	2.71155	0.425024	0.670819	NA
1700003E16Rik	114.67	-0.454153	0.450881	-1.00726	0.313811	0.590932
1700003F12Rik	6.23396	1.67115	1.42698	1.17111	0.241555	0.509451
1700003G18Rik	2.06391	3.18066	2.80184	1.1352	0.25629	NA
1700003M02Rik	140.404	-0.27905	0.614644	-0.454003	0.649827	0.847724
1700003M07Rik	31.7946	0.0200469	0.702966	0.0285175	0.977249	0.992591
1700007G11Rik	78.8977	-0.610612	0.610669	-0.999906	0.317356	0.594417
1700007J10Rik	31.3475	0.667255	0.663927	1.00501	0.314891	0.59217
1700007K13Rik	228.496	-0.855518	0.468777	-1.825	0.0680011	0.235014
1700007L15Rik	55.9148	-0.484985	0.475978	-1.01892	0.308239	0.585073
1700007P06Rik	10.9771	-0.241259	0.825322	-0.292321	0.770041	0.905467
1700008J07Rik	87.6346	0.23034	0.374304	0.615382	0.538303	0.777299
1700008O03Rik	4.7358	-0.113372	1.29205	-0.0877461	0.930078	0.974849
1700008P20Rik	17.8431	0.511071	1.52982	0.334072	0.738325	0.893389
1700009P17Rik	189.634	-0.418724	0.439643	-0.952418	0.340885	0.61837
1700010B08Rik	2.80569	-1.01964	1.56132	-0.653064	0.513715	NA
1700010I02Rik	28.2772	1.12775	1.16835	0.965251	0.334419	0.611957
1700010I14Rik	1.45605	4.45948	3.64851	1.22227	0.221604	NA
1700011A15Rik	4.85521	1.01802	2.1002	0.484726	0.62787	0.836162
1700011H14Rik	4.83833	-0.738486	2.05178	-0.359925	0.718903	0.883613
1700011I03Rik	1.25496	-0.536477	2.62638	-0.204265	0.838147	NA
1700011J10Rik	199.684	-0.69977	0.292741	-2.39041	0.0168298	0.0911925
1700012A16Rik	3.86567	0.435921	1.6572	0.263046	0.792515	0.914754
1700012B09Rik	3.10762	0.22244	2.19805	0.101199	0.919393	NA
1700012B15Rik	117.298	0.884219	0.297309	2.97407	0.00293878	0.0257155
1700012D01Rik	24.1677	-1.34997	0.709516	-1.90267	0.0570842	0.209111
1700012D14Rik	10.1243	0.488947	0.893169	0.547429	0.584084	0.808845
1700013F07Rik	42.9219	0.204742	0.615625	0.332576	0.739454	0.893476
1700013G23Rik	5.75674	0.308679	1.22756	0.251458	0.80146	0.919823
1700013H16Rik	4.48942	-1.66582	3.01998	-0.551599	0.581223	0.806298
1700013N18Rik	7.38415	0.328716	1.82544	0.180075	0.857094	0.944511
1700015E13Rik	3.92045	0.816942	2.2988	0.355377	0.722307	0.885335
1700015F17Rik	1.27951	-1.30571	3.61057	-0.361636	0.717624	NA
1700016C15Rik	31.0382	0.718375	0.93948	0.764652	0.444479	0.709606
1700016D06Rik	121.884	0.0212381	0.495118	0.042895	0.965785	0.987913
1700016G22Rik	1.43917	-2.43485	2.58885	-0.940514	0.346954	NA
1700016H13Rik	4.17381	-0.685556	1.78755	-0.383517	0.701336	0.876004
1700016K19Rik	140.731	-0.0629718	0.51645	-0.121932	0.902953	0.964066
1700016M24Rik	0.997804	3.91437	3.65669	1.07047	0.284408	NA
1700017B05Rik	860.765	0.155707	0.237472	0.655686	0.512026	0.758344
1700018A04Rik	8.74579	-0.479769	0.902233	-0.531758	0.594894	0.815162
1700018F24Rik	1.30199	1.47542	3.60082	0.409746	0.681992	NA
1700018L02Rik	22.8834	1.22393	0.6761	1.81028	0.0702519	0.240163
1700019B03Rik	2.22001	3.25873	3.20008	1.01833	0.308523	NA
1700019D03Rik	17.6569	-0.391159	1.07844	-0.362707	0.716824	0.883067
1700019E19Rik	891.753	0.086476	0.221226	0.390894	0.695875	0.873797
1700019G17Rik	370.377	-0.907487	0.400371	-2.26662	0.0234137	0.115504
1700019L03Rik	57.6928	-1.04981	0.606724	-1.73029	0.0835781	0.26863
1700019N12Rik	3.89664	1.6306	2.41343	0.675638	0.499271	0.748647
1700020D05Rik	1.81895	0.012691	2.88616	0.0043972	0.996492	NA
1700020G17Rik	2.91197	1.09939	1.43984	0.763553	0.445134	NA
1700020I14Rik	621.919	-0.046045	0.2631	-0.175009	0.861072	0.946068
1700020L24Rik	1.64686	2.22601	2.43554	0.913971	0.360732	NA
1700020N18Rik	3.79308	0.440306	1.61649	0.272384	0.785327	0.911151
1700020O03Rik	407.067	0.480172	0.280527	1.71168	0.0869563	0.275769
1700021C14Rik	38.6333	-0.137548	0.49008	-0.280665	0.778967	0.908804
1700021F05Rik	274.993	-0.254456	0.215434	-1.18113	0.237551	0.504087
1700021K19Rik	890.098	-0.559822	0.262997	-2.12863	0.0332851	0.146239
1700022I11Rik	4.33486	0.362612	3.00307	0.120747	0.903891	0.96435
1700022P22Rik	1.59938	1.91554	2.83121	0.676581	0.498672	NA
1700023E05Rik	21.1558	-0.556408	0.782569	-0.711001	0.477084	0.733267
1700023F06Rik	3.425	0.389121	2.22117	0.175187	0.860932	0.94598
1700023L04Rik	16.0219	-0.355193	0.88405	-0.401779	0.687847	0.868585
1700024G13Rik	17.6265	0.898541	1.15691	0.776671	0.437353	0.704233
1700024P16Rik	9.4379	-7.08941	2.41948	-2.93014	0.00338805	0.0284578
1700025C18Rik	1.83562	-0.51164	1.9256	-0.265704	0.790467	NA
1700025E21Rik	1.83359	0.466707	3.63106	0.128532	0.897728	NA
1700025G04Rik	55.869	-0.683332	0.768176	-0.889552	0.373706	0.649518
1700025K23Rik	47.8033	-0.0903595	0.61423	-0.14711	0.883045	0.95542
1700025K24Rik	6.5414	0.0686697	1.04742	0.0655609	0.947727	0.981916
1700025N23Rik	67.1645	0.0589153	0.480688	0.122564	0.902452	0.963756
1700026D08Rik	77.9131	-0.217377	0.581218	-0.374002	0.708403	0.879739
1700026D11Rik	1.93253	-1.34697	2.11026	-0.638299	0.523279	NA
1700026L06Rik	178.434	-0.595466	0.672917	-0.884903	0.376209	0.651946
1700027A23Rik	282.383	-0.610528	0.421208	-1.44947	0.147207	0.382289
1700027D21Rik	1.12759	0.0901181	3.6538	0.0246642	0.980323	NA
1700028D13Rik	3.99062	1.01715	2.1127	0.481445	0.630201	0.836955
1700028E10Rik	10.4542	-0.204007	1.0316	-0.197757	0.843235	0.939571
1700028J19Rik	14.5365	-1.68815	1.16184	-1.453	0.146224	0.3808
1700028K03Rik	12.6513	1.13823	1.09076	1.04352	0.296705	0.573138
1700028P14Rik	32.3905	-0.586199	0.656423	-0.893021	0.371846	0.647661
1700029F09Rik	552.655	0.0605715	0.195326	0.310105	0.756481	0.901151
1700029F12Rik	4.03366	0.784727	1.24217	0.631737	0.527559	0.769181
1700029G01Rik	417.179	0.764385	0.250457	3.05196	0.0022735	0.0211498
1700029I01Rik	89.247	0.240122	0.470282	0.510591	0.609637	0.824785
1700029I15Rik	6.7953	-0.194747	1.06364	-0.183095	0.854724	0.944111
1700029J07Rik	112.142	-0.151414	0.513615	-0.2948	0.768146	0.904743
1700029J11Rik	2.92541	2.10139	2.4807	0.847094	0.396943	NA
1700030C10Rik	32.5466	0.0825677	0.544261	0.151706	0.879419	0.953587
1700030J22Rik	70.294	-0.0362287	0.730361	-0.0496038	0.960438	0.986341
1700030K09Rik	234.93	0.355803	0.30238	1.17668	0.239325	0.506291
1700034E13Rik	1.16097	1.55565	3.61694	0.4301	0.667123	NA
1700034F02Rik	2.5217	-0.118304	2.62707	-0.0450324	0.964081	NA
1700034H14Rik	454.43	-0.429197	0.223834	-1.91748	0.0551765	0.204767
1700034H15Rik	28.5304	-0.370749	0.666183	-0.556528	0.57785	0.803685
1700034I23Rik	6.24772	2.27651	2.50047	0.910432	0.362595	0.639918
1700034J05Rik	3.75103	0.440096	2.31181	0.190368	0.84902	0.942306
1700034P13Rik	14.0396	0.0114185	0.940446	0.0121416	0.990313	0.996763
1700037C18Rik	118.501	-0.203077	0.360163	-0.563848	0.572858	0.800339
1700037H04Rik	834.232	0.176653	0.210799	0.838016	0.402021	0.675782
1700040I03Rik	289.01	-0.273245	0.231616	-1.17973	0.238106	0.504667
1700040L02Rik	33.548	-0.0239006	0.706342	-0.0338372	0.973007	0.990967
1700040N02Rik	1.10873	-0.053397	3.61822	-0.0147578	0.988225	NA
1700045H11Rik	1.84026	-0.689337	2.05962	-0.334691	0.737858	NA
1700045I19Rik	5.53942	1.81748	2.45102	0.74152	0.458378	0.71974
1700047I17Rik2	3077.88	0.453074	0.295492	1.53329	0.125205	0.346469
1700048M11Rik	2.86936	1.68741	2.25148	0.749469	0.453575	NA
1700048O20Rik	63.4335	0.37067	0.501704	0.738823	0.460014	0.7211
1700049E15Rik	41.984	-5.79346	1.25472	-4.61735	3.88676e-06	0.000127822
1700049G17Rik	207.131	-0.160847	0.510645	-0.314988	0.75277	0.899538
1700052K11Rik	190.829	1.01238	0.263322	3.84466	0.00012072	0.00208858
1700052N19Rik	260.481	0.391113	0.243474	1.60638	0.10819	0.316235
1700054N08Rik	23.0851	0.560518	0.736227	0.761338	0.446455	0.711334
1700055N04Rik	4.99228	-1.13728	2.81763	-0.40363	0.686485	0.868348
1700056E22Rik	17.0202	0.556837	0.82641	0.673802	0.500437	0.749572
1700057H15Rik	1.10038	2.80135	2.66388	1.0516	0.292981	NA
1700061G19Rik	13.1878	-0.178625	0.877607	-0.203537	0.838715	0.937422
1700061I17Rik	4.30043	1.96438	1.7268	1.13759	0.255293	0.525476
1700061J05Rik	0.794558	-3.63891	3.72057	-0.978051	0.328049	NA
1700063D05Rik	24.6693	0.447336	0.609734	0.733658	0.463157	0.72239
1700064J06Rik	36.1471	-0.597316	0.809704	-0.737696	0.460699	0.721534
1700065D16Rik	16.0839	0.0530052	0.718501	0.073772	0.941192	0.978932
1700066B19Rik	127.3	-0.642567	0.646279	-0.994256	0.320098	0.597094
1700066J24Rik	1.34554	0.629991	2.63696	0.238908	0.811177	NA
1700066M21Rik	171.633	-0.333784	0.362543	-0.920673	0.357221	0.634445
1700067G17Rik	1.63952	1.73085	2.82305	0.613114	0.539801	NA
1700067K01Rik	9.69811	-0.333956	1.40044	-0.238465	0.81152	0.924398
1700071M16Rik	11.0995	-0.336112	1.92288	-0.174796	0.86124	0.946171
1700073E17Rik	9.54041	0.0455679	0.906011	0.0502951	0.959887	0.986284
1700081L11Rik	967.714	0.232068	0.176229	1.31686	0.187886	0.439728
1700084C01Rik	3.97498	3.1558	2.54836	1.23837	0.21558	0.475657
1700084E18Rik	10.5603	-2.05335	0.916675	-2.24	0.0250911	0.121684
1700086L19Rik	11.0247	2.79651	1.63894	1.70629	0.0879545	0.277938
1700086O06Rik	64.627	0.203262	0.420598	0.483269	0.628905	0.83634
1700088E04Rik	270.494	-0.564711	0.361961	-1.56015	0.118726	0.335382
1700092M07Rik	2.47555	0.200469	2.27193	0.088237	0.929688	NA
1700094D03Rik	378.873	-0.0343824	0.335995	-0.10233	0.918495	0.970376
1700096K18Rik	113.936	-0.0933158	0.339794	-0.274625	0.783605	0.910776
1700097N02Rik	3.7857	0.139748	2.25172	0.0620626	0.950513	0.982626
1700101E01Rik	14.551	-0.260177	0.896819	-0.290111	0.771731	0.906408
1700101I11Rik	2.32792	-5.16555	3.48791	-1.48099	0.13861	NA
1700102H20Rik	11.2824	-0.513248	0.85377	-0.601155	0.547737	0.783387
1700102P08Rik	4.58018	0.647875	1.61566	0.400997	0.688422	0.868884
1700105P06Rik	2.36867	1.52669	2.71604	0.5621	0.574048	NA
1700106N22Rik	154.508	0.0168069	0.386882	0.0434418	0.965349	0.987913
1700109H08Rik	4.90688	0.7386	1.45732	0.506822	0.61228	0.826493
1700110C19Rik	1.76189	-0.617368	2.45564	-0.251409	0.801498	NA
1700110K17Rik	4.66734	-1.01311	2.03021	-0.499015	0.617769	0.829809
1700110M21Rik	1.38879	-2.66395	3.17289	-0.839597	0.401135	NA
1700112E06Rik	148.942	-0.470763	0.238345	-1.97513	0.0482529	0.187376
1700113A16Rik	151.609	-0.171178	0.316303	-0.541184	0.588381	0.81128
1700113H08Rik	0.931434	-3.8594	3.71459	-1.03898	0.298812	NA
1700113I22Rik	129.897	-0.750458	0.373416	-2.00971	0.044462	0.17728
1700120C14Rik	4.75616	-0.299151	1.61858	-0.184823	0.853368	0.943362
1700120E14Rik	8.46532	-1.93431	1.29351	-1.4954	0.134811	0.36228
1700120K04Rik	4.412	0.423829	1.33709	0.316978	0.75126	0.898851
1700121L16Rik	3.75693	-0.139236	1.39841	-0.0995669	0.920688	0.971146
1700123I01Rik	5.78959	1.18449	1.25124	0.946653	0.343815	0.62144
1700123M08Rik	28.1909	0.389234	0.644997	0.603467	0.546198	0.782453
1700123O20Rik	1001.38	-0.12279	0.181308	-0.677244	0.498251	0.748099
1700125D06Rik	7.78674	0.603485	1.25241	0.481859	0.629906	0.836805
1700125G22Rik	1.74359	0.0263642	2.1551	0.0122334	0.990239	NA
1700125H20Rik	7.91485	2.40375	1.21144	1.98421	0.0472322	0.184625
1700128F08Rik	66.6089	0.139729	0.493103	0.283367	0.776895	0.908154
1810006J02Rik	1.36831	-4.30657	3.70492	-1.16239	0.245076	NA
1810006K21Rik	2828.62	-0.350497	0.166063	-2.11062	0.0348047	0.150663
1810007D17Rik	2.68796	-0.819435	1.58876	-0.515769	0.606016	NA
1810007I06Rik	5.7793	0.721421	1.46786	0.491479	0.623088	0.832929
1810008A18Rik	505.058	0.124915	0.213341	0.585518	0.5582	0.789818
1810008I18Rik	58.3857	-0.636602	0.566106	-1.12453	0.260789	0.532313
1810009A15Rik	626.86	-0.331548	0.189163	-1.75271	0.0796519	0.260439
1810010D01Rik	110.722	-1.51199	0.610287	-2.47751	0.0132303	0.0770252
1810010H24Rik	571.323	-0.172366	0.484583	-0.355701	0.722065	0.885321
1810011H11Rik	13.0499	7.13613	2.11544	3.37335	0.000742589	0.00886706
1810011O10Rik	458.38	-2.53143	0.421024	-6.01255	1.82627e-09	1.47557e-07
1810012K16Rik	5.25477	-0.329421	2.001	-0.164628	0.869237	0.949663
1810012P15Rik	206.079	0.0605385	0.354474	0.170784	0.864394	0.947233
1810013A23Rik	1.74635	-1.35271	2.25731	-0.59926	0.549	NA
1810013D10Rik	1166.22	-0.171948	0.189435	-0.907688	0.364043	0.641043
1810013L24Rik	1250.02	0.214748	0.153891	1.39546	0.162878	0.404343
1810014B01Rik	116.131	-0.57224	0.389873	-1.46776	0.142169	0.374375
1810014F10Rik	189.101	-0.530004	0.337129	-1.57211	0.115925	0.330276
1810018F18Rik	3.4945	-1.3181	1.87707	-0.702212	0.482547	0.736828
1810019D21Rik	812.697	0.00733353	0.19	0.0385976	0.969211	0.989372
1810019J16Rik	841.797	0.248046	0.177554	1.39702	0.162408	0.404042
1810020D17Rik	343.948	-0.240447	0.210063	-1.14464	0.252358	0.522338
1810020O05Rik	4.7331	-2.51012	2.53582	-0.989864	0.322241	0.599685
1810021B22Rik	29.6003	-0.153137	0.700187	-0.218709	0.826877	0.932177
1810022K09Rik	1885.41	0.0850219	0.151441	0.561421	0.574511	0.801416
1810024B03Rik	14.2248	0.574375	0.701245	0.819079	0.412741	0.683906
1810026B05Rik	853.554	0.397194	0.229377	1.73162	0.0833415	0.268369
1810026J23Rik	921.382	0.0562653	0.16759	0.335731	0.737074	0.893389
1810027O10Rik	1065.72	-0.0277669	0.203505	-0.136443	0.891471	0.95877
1810029B16Rik	171.283	0.303873	0.277533	1.09491	0.273558	0.548075
1810030N24Rik	282.246	0.229063	0.304573	0.752079	0.452003	0.714382
1810030O07Rik	1113.89	0.0734941	0.151839	0.484028	0.628366	0.836181
1810031K17Rik	1899.22	0.0397107	0.121635	0.326474	0.744066	0.895736
1810032O08Rik	174.351	-0.152691	0.24328	-0.627634	0.530244	0.771753
1810033B17Rik	221.241	3.32136	0.758307	4.37996	1.18699e-05	0.000320182
1810034E14Rik	29.3212	-0.674048	0.903612	-0.745948	0.455699	0.718083
1810035I16Rik	41.4435	-0.113891	0.630424	-0.180658	0.856636	0.944511
1810035L17Rik	907.756	-0.16795	0.223467	-0.751568	0.452311	0.714655
1810037I17Rik	2535.66	0.0571843	0.197833	0.289053	0.772541	0.906542
1810041L15Rik	2.51135	0.874295	2.76171	0.316577	0.751564	NA
1810043G02Rik	515.225	0.324483	0.249715	1.29941	0.193802	0.448169
1810043H04Rik	471.979	0.171669	0.197974	0.867129	0.385871	0.66099
1810044D09Rik	43.502	0.634715	0.509898	1.24479	0.21321	0.473446
1810046J19Rik	1652.83	-0.208112	0.144088	-1.44434	0.148643	0.384332
1810046K07Rik	2.99984	0.645323	2.55434	0.252638	0.800548	NA
1810048J11Rik	572.879	-0.153499	0.234843	-0.653625	0.513353	0.759673
1810049H13Rik	129.306	0.100779	0.375624	0.268297	0.78847	0.912335
1810055G02Rik	769.644	0.12028	0.229825	0.523356	0.600726	0.818556
1810058I24Rik	1479.65	-0.233917	0.138969	-1.68324	0.0923294	0.286083
1810062G17Rik	54.6287	0.827624	0.40296	2.05386	0.0399892	0.16576
1810062O18Rik	22.1265	0.0241768	0.618223	0.0391068	0.968805	0.989189
1810063B05Rik	303.443	-0.605837	0.218277	-2.77555	0.00551088	0.0410083
1810063B07Rik	504.408	0.0516578	0.162026	0.318825	0.749859	0.898285
1810064F22Rik	164.541	-0.251817	0.295695	-0.851611	0.39443	0.668884
1810074P20Rik	835.399	0.329547	0.177419	1.85746	0.0632464	0.223412
2010001E11Rik	12.8372	0.297261	1.01535	0.292768	0.769699	0.905157
2010001M06Rik	22.0017	1.54817	0.895528	1.72877	0.0838495	0.269112
2010001M09Rik	3.30149	-2.73033	2.20981	-1.23555	0.216627	NA
2010002M12Rik	50.0595	-0.742165	0.619525	-1.19796	0.230933	0.495652
2010002N04Rik	510.964	0.322739	0.185257	1.74211	0.0814886	0.264759
2010003K11Rik	7.63394	0.4359	1.5392	0.2832	0.777024	0.908154
2010003O02Rik	147.247	-0.113037	0.340868	-0.331614	0.740181	0.893531
2010005H15Rik	22.9147	-1.20625	0.88957	-1.35599	0.175101	0.421303
2010009K17Rik	2.55399	1.85162	2.33616	0.792593	0.428015	NA
2010010A06Rik	0.890033	-0.785892	3.67915	-0.213607	0.830853	NA
2010011I20Rik	1092.19	-0.558561	0.221413	-2.52271	0.0116454	0.0706669
2010012O05Rik	372.827	0.0803081	0.270883	0.296468	0.766873	0.904391
2010015L04Rik	108.634	-0.00709494	0.44911	-0.0157978	0.987396	0.995779
2010016I18Rik	147.963	0.0198603	0.353784	0.0561367	0.955233	0.984803
2010106G01Rik	3021.29	0.485489	0.154376	3.14485	0.0016617	0.0167719
2010107E04Rik	2383.45	-0.0806253	0.175275	-0.459994	0.645521	0.846077
2010107G12Rik	24.9981	-0.216787	0.751837	-0.288343	0.773084	0.906634
2010107G23Rik	522.703	0.509546	0.211356	2.41084	0.0159158	0.0878059
2010107H07Rik	160.751	0.330364	0.234186	1.41069	0.158337	0.398572
2010109I03Rik	138.162	0.833562	0.30651	2.71953	0.00653745	0.0465786
2010109K11Rik	413.705	-0.543489	0.410095	-1.32528	0.18508	0.435786
2010110P09Rik	0.632614	3.27866	3.671	0.893122	0.371792	NA
2010111I01Rik	582.123	1.16585	0.184792	6.30899	2.80861e-10	2.92187e-08
2010204K13Rik	155.197	-0.277714	0.258964	-1.0724	0.28354	0.558534
2010300C02Rik	754.623	-0.3591	0.197522	-1.81802	0.069061	0.23752
2010305A19Rik	311.286	0.157507	0.294511	0.534808	0.592782	0.8137
2010310C07Rik	1.20481	-1.18805	3.61362	-0.328769	0.74233	NA
2010317E24Rik	52.6843	-0.343819	0.758308	-0.453403	0.650259	0.847724
2010320M18Rik	207.791	0.181763	0.242192	0.750492	0.452959	0.715357
2010321M09Rik	641.403	0.779757	0.228304	3.41544	0.000636794	0.00784702
2200002D01Rik	2144.74	0.357105	0.214691	1.66335	0.0962432	0.294066
2200002J24Rik	6.77375	1.40705	2.45319	0.573557	0.566268	0.795523
2200002K05Rik	176.009	-0.153851	0.453631	-0.339154	0.734493	0.892369
2210009G21Rik	135.747	-0.0130002	0.425798	-0.0305314	0.975643	0.992098
2210010C04Rik	7.14769	0.151635	1.01904	0.148803	0.881709	0.954681
2210010C17Rik	687.878	-2.87709	1.02935	-2.79507	0.0051888	0.0392725
2210012G02Rik	262.632	-0.0747502	0.2496	-0.29948	0.764574	0.903632
2210013O21Rik	544.001	0.153532	0.201227	0.762978	0.445476	0.710414
2210015D19Rik	291.153	0.0856705	0.30497	0.280914	0.778776	0.908804
2210016F16Rik	1310.91	0.307321	0.159623	1.92529	0.0541928	0.202452
2210016L21Rik	428.26	0.105964	0.18342	0.577715	0.563457	0.793304
2210018M11Rik	550.567	-0.765278	0.30027	-2.54864	0.0108145	0.0672404
2210019I11Rik	9.81482	1.8539	1.83565	1.00994	0.312524	0.588831
2210020M01Rik	101.989	-0.236052	0.552767	-0.427038	0.669352	0.858225
2210021J22Rik	449.742	-0.548389	0.237846	-2.30565	0.0211302	0.107557
2210039B01Rik	117.369	-0.125066	0.502294	-0.248989	0.803369	0.920938
2210403K04Rik	868.984	0.902854	0.251545	3.58924	0.000331647	0.00465095
2210404J11Rik	355.223	0.580248	0.226967	2.55653	0.0105723	0.0661734
2210404O07Rik	67.7189	-1.47303	0.633065	-2.32682	0.0199749	0.103551
2210404O09Rik	211.162	0.217319	0.278519	0.780267	0.435234	0.702609
2210407C18Rik	162.384	3.354	0.473996	7.07601	1.48369e-12	2.95199e-10
2210408F21Rik	152.038	-0.753243	0.34257	-2.1988	0.027892	0.130213
2210408I21Rik	155.38	0.0199043	0.391472	0.0508448	0.959449	0.986025
2210409D07Rik	1.82847	-4.1377	3.70823	-1.11582	0.264501	NA
2210411K11Rik	769.787	-0.0141058	0.202482	-0.0696642	0.944461	0.980369
2210415F13Rik	58.9175	2.2713	0.668084	3.39972	0.000674558	0.00822124
2210416O15Rik	1.64692	1.39994	2.21404	0.632301	0.52719	NA
2210417A02Rik	14.3157	-1.6453	0.915449	-1.79726	0.0722941	0.244363
2210417K05Rik	20.9097	0.360772	0.744181	0.484791	0.627825	0.836162
2210420H20Rik	5.5115	0.415211	1.44788	0.286773	0.774286	0.906985
2300002M23Rik	24.3887	2.37227	1.52377	1.55685	0.119506	0.336669
2300009A05Rik	225.07	0.786678	0.274235	2.86863	0.00412256	0.033163
2310001A20Rik	1913.38	-0.187923	0.185191	-1.01475	0.310223	0.587168
2310001H17Rik	30.4898	1.49798	0.710527	2.10826	0.0350083	0.151133
2310001K24Rik	14.1645	-0.693156	0.789739	-0.877703	0.380105	0.655425
2310002D06Rik	14.1181	-0.311378	0.853802	-0.364696	0.715338	0.882433
2310002J15Rik	81.9161	2.3699	0.843757	2.80874	0.00497353	0.0381696
2310002L13Rik	48.5733	-0.985264	1.00424	-0.981099	0.326544	0.604583
2310003C23Rik	395.964	-0.512958	0.186048	-2.75712	0.00583122	0.0427525
2310003F16Rik	1712.82	-0.236503	0.130454	-1.81292	0.0698435	0.239346
2310003H01Rik	455.193	-0.0411784	0.211993	-0.194245	0.845984	0.940988
2310003L22Rik	160.881	0.284706	0.354946	0.802109	0.42249	0.691456
2310004I24Rik	444.224	-0.448023	0.206794	-2.16652	0.0302716	0.13704
2310004N24Rik	746.323	0.0568992	0.185385	0.306924	0.758901	0.901989
2310005A03Rik	10.8879	-0.0657038	0.831291	-0.0790382	0.937002	0.977152
2310007B03Rik	1707.44	-0.565728	0.191365	-2.95627	0.00311386	0.0267187
2310007L24Rik	319.458	-1.98901	0.327987	-6.06429	1.32536e-09	1.12212e-07
2310008H04Rik	626.916	0.953866	0.167827	5.68361	1.31878e-08	8.60285e-07
2310008H09Rik	1192.91	-0.14768	0.115337	-1.28042	0.200396	0.456324
2310009A05Rik	239.28	0.180289	0.249792	0.721756	0.470445	0.728185
2310009B15Rik	194.279	0.0853243	0.337369	0.252911	0.800337	0.919431
2310010J17Rik	39.9192	0.00054183	0.510218	0.00106196	0.999153	0.999737
2310010M20Rik	5.50298	-1.13201	1.20063	-0.942845	0.34576	0.623151
2310011J03Rik	758.299	0.153556	0.191154	0.803314	0.421793	0.69085
2310014F07Rik	4.67207	-0.75662	2.5664	-0.294818	0.768133	0.904743
2310014L17Rik	183.378	-0.972492	0.359602	-2.70436	0.00684363	0.0483489
2310015A10Rik	171.411	0.704722	0.367873	1.91566	0.0554078	0.205386
2310015B20Rik	1.18462	0.436337	3.60061	0.121184	0.903545	NA
2310015D24Rik	7.65057	0.238283	1.1656	0.204429	0.838018	0.93713
2310016M24Rik	1706.35	0.257812	0.176383	1.46166	0.143833	0.377073
2310021P13Rik	926.885	0.0678704	0.232524	0.291886	0.770374	0.905549
2310022A10Rik	200.299	0.222833	0.370624	0.601238	0.547681	0.783387
2310022B05Rik	1276.01	-0.528851	0.235573	-2.24495	0.0247712	0.120576
2310028H24Rik	104.547	0.323672	0.27731	1.16719	0.243136	0.511231
2310030G06Rik	662.083	-0.187373	0.183142	-1.0231	0.306259	0.583102
2310030N02Rik	184.701	-0.399323	0.363268	-1.09925	0.271658	0.545613
2310033E01Rik	9.97233	0.807663	1.49453	0.540414	0.588912	0.811441
2310033P09Rik	253.419	-0.122724	0.21691	-0.565784	0.571541	0.799233
2310034G01Rik	145.181	0.138591	0.48333	0.286742	0.77431	0.906985
2310034O05Rik	9.03176	0.287387	0.95106	0.302175	0.762518	0.902614
2310035C23Rik	845.498	0.211898	0.158323	1.33839	0.180769	0.428999
2310035K24Rik	537.371	0.142985	0.259579	0.550836	0.581746	0.806776
2310036O22Rik	1746.47	-0.0815253	0.140677	-0.57952	0.562239	0.79264
2310037I24Rik	1931.11	-0.17387	0.18805	-0.924597	0.355176	0.632603
2310039H08Rik	438.294	0.0621368	0.262226	0.236959	0.812688	0.924886
2310039L15Rik	203.044	-0.0455027	0.374684	-0.121443	0.90334	0.96424
2310040G24Rik	59.1484	-1.35648	0.563049	-2.40917	0.015989	0.088061
2310042D19Rik	81.6549	-0.585742	0.472449	-1.2398	0.215049	0.475342
2310043J07Rik	135.831	0.717824	0.707418	1.01471	0.310244	0.587168
2310043L19Rik	3.06708	1.16404	2.51217	0.463362	0.643105	NA
2310043O21Rik	2.56455	0.0886696	1.90551	0.0465333	0.962885	NA
2310044G17Rik	793.357	0.21543	0.162187	1.32828	0.184086	0.434152
2310044H10Rik	1804.31	0.0141193	0.140121	0.100765	0.919737	0.970973
2310045N01Rik	539.98	-0.33834	0.203025	-1.66649	0.0956152	0.292731
2310046A06Rik	0.794558	-3.63891	3.72057	-0.978051	0.328049	NA
2310046K01Rik	649.683	0.555811	0.384508	1.44551	0.148314	0.38392
2310046O06Rik	333.152	0.0790891	0.326689	0.242093	0.808708	0.923343
2310047B19Rik	188.797	0.314193	0.273029	1.15076	0.249829	0.519321
2310047M10Rik	115.588	0.0332561	0.308346	0.107853	0.914112	0.968286
2310057M21Rik	239.014	0.495824	0.289257	1.71413	0.0865054	0.274777
2310061C15Rik	229.593	-0.481471	0.27735	-1.73597	0.0825695	0.267086
2310061I04Rik	315.901	-0.142494	0.230489	-0.618227	0.536426	0.775785
2310061J03Rik	89.6243	0.248018	0.382905	0.647728	0.517161	0.761946
2310067B10Rik	1131.81	-0.502422	0.221024	-2.27315	0.0230169	0.114073
2310068J16Rik	13.8501	-0.0951223	0.882559	-0.10778	0.91417	0.968286
2310069B03Rik	10.4474	-1.09328	1.17948	-0.92692	0.353968	0.631556
2310079F23Rik	155.333	0.0627876	0.335123	0.187357	0.851381	0.943168
2400001E08Rik	1588.77	0.165459	0.139126	1.18927	0.234334	0.499985
2400003C14Rik	3329.17	-0.0680615	0.152685	-0.445763	0.655769	0.850332
2400009B08Rik	46.4396	0.650402	0.742129	0.876401	0.380812	0.656207
2410001C21Rik	1902.42	0.0343521	0.125104	0.274589	0.783632	0.910776
2410002F23Rik	1107.37	-0.0417593	0.259925	-0.160659	0.872362	0.951434
2410002I01Rik	295.523	0.119425	0.286129	0.41738	0.6764	0.862405
2410002O22Rik	1135	0.176963	0.177494	0.997008	0.318761	0.595856
2410003K15Rik	478.019	-0.483999	0.211895	-2.28414	0.0223631	0.111724
2410003L11Rik	3.4525	2.55245	2.54221	1.00403	0.315364	0.592414
2410004A20Rik	15.4088	-1.85967	0.857166	-2.16956	0.0300403	0.136391
2410004B18Rik	271.166	-0.0618496	0.269849	-0.229201	0.818713	0.928337
2410004I01Rik	2.24257	-3.76649	3.717	-1.01332	0.31091	NA
2410004N09Rik	100.679	-0.361848	0.320528	-1.12891	0.258935	0.529888
2410004P03Rik	317.326	-0.833359	0.502424	-1.65868	0.0971809	0.295699
2410006H16Rik	803.47	0.0268004	0.149993	0.178677	0.858191	0.945056
2410007B07Rik	18.0639	-0.464654	0.701768	-0.662119	0.507895	0.755008
2410015M20Rik	1209.62	-0.342306	0.135624	-2.52394	0.0116049	0.0704751
2410016O06Rik	240.864	-0.374824	0.26512	-1.41379	0.157423	0.396975
2410017I17Rik	5.47375	-0.00908584	1.30214	-0.00697762	0.994433	0.998447
2410017P09Rik	277.967	0.239453	0.322519	0.742447	0.457816	0.719399
2410018L13Rik	143.076	-0.0397358	0.283848	-0.139989	0.888668	0.957615
2410018M08Rik	106.241	-0.563923	0.32216	-1.75044	0.0800418	0.261338
2410021H03Rik	5.97654	-0.064092	1.08297	-0.0591815	0.952808	0.983517
2410022L05Rik	311.92	-0.203256	0.332003	-0.612211	0.540398	0.7787
2410042D21Rik	770.901	0.248832	0.231097	1.07674	0.281596	0.555936
2410057H14Rik	7.32462	1.25772	1.12229	1.12067	0.262428	0.534219
2410066E13Rik	39.926	-0.203839	0.673701	-0.302566	0.76222	0.90243
2410075B13Rik	154.184	-0.722197	0.408068	-1.7698	0.0767612	0.254014
2410076I21Rik	7.94945	0.801156	1.64403	0.487312	0.626037	0.835119
2410088K16Rik	8.21912	0.70129	0.919954	0.762309	0.445875	0.710766
2410089E03Rik	577.598	0.188216	0.248706	0.756781	0.449181	0.712681
2410091C18Rik	713.215	0.0609247	0.20562	0.296298	0.767003	0.904391
2410114N07Rik	14.8433	-0.0867681	0.764587	-0.113484	0.909647	0.966546
2410124H12Rik	6.93546	-6.19387	2.0265	-3.05644	0.00223985	0.0209347
2410127L17Rik	1183	-0.0564967	0.21461	-0.263253	0.792356	0.914703
2410131K14Rik	349.785	0.0853553	0.226635	0.37662	0.706456	0.878447
2410137M14Rik	2.24181	-3.39351	2.74912	-1.2344	0.217055	NA
2500003M10Rik	1918.08	0.305393	0.149951	2.03662	0.0416885	0.169707
2500004C02Rik	236.507	-0.693611	0.391429	-1.772	0.0763952	0.25336
2510002D24Rik	632.239	0.0265299	0.219819	0.12069	0.903937	0.96435
2510003E04Rik	803.383	-0.260692	0.179275	-1.45415	0.145905	0.380437
2510006D16Rik	1274.76	0.234411	0.175196	1.338	0.180897	0.42924
2510009E07Rik	1279.46	-0.800596	0.202947	-3.94486	7.9847e-05	0.00151154
2510012J08Rik	589.342	0.0169542	0.186226	0.0910414	0.92746	0.97411
2510039O18Rik	1426.62	0.263	0.186454	1.41053	0.158382	0.398572
2510049J12Rik	171.133	-0.0274783	0.396396	-0.0693203	0.944735	0.980506
2600006L11Rik	8.01996	0.544969	1.17124	0.465292	0.641722	0.84398
2610001J05Rik	2214.87	0.147235	0.155375	0.947608	0.343329	0.621208
2610002D18Rik	17.9542	1.37875	0.834136	1.65291	0.0983488	0.298402
2610002I17Rik	152.158	0.32806	0.491327	0.667701	0.504324	0.752806
2610002J02Rik	786.082	0.224477	0.149786	1.49866	0.133963	0.361181
2610002M06Rik	616.817	0.0778329	0.189007	0.411799	0.680487	0.864775
2610005L07Rik	1381.79	-0.346628	0.269635	-1.28554	0.198602	0.454189
2610008E11Rik	352.679	-0.194126	0.356395	-0.544692	0.585965	0.80995
2610015P09Rik	230.398	-0.273295	0.36892	-0.740799	0.458815	0.720142
2610016A17Rik	1.30581	1.52607	3.60093	0.423798	0.671713	NA
2610018G03Rik	91.1528	-0.653594	0.383911	-1.70246	0.0886688	0.279418
2610019E17Rik	31.0587	0.0928697	0.602002	0.154268	0.877398	0.953085
2610019F03Rik	118.594	0.397485	0.502382	0.791201	0.428827	0.696707
2610020C07Rik	32.063	0.853728	0.703476	1.21359	0.224906	0.487735
2610020H08Rik	82.0195	-0.265707	0.547645	-0.485181	0.627548	0.836082
2610021K21Rik	34.4937	-0.524756	0.778912	-0.673704	0.5005	0.749572
2610027L16Rik	1070.78	-0.261424	0.170124	-1.53666	0.124375	0.345314
2610028E06Rik	3.01065	0.271851	1.91017	0.142317	0.886829	NA
2610028H24Rik	782.756	-0.550959	0.334778	-1.64574	0.0998163	0.301019
2610029G23Rik	718.732	0.466203	0.216631	2.15206	0.031393	0.14022
2610029I01Rik	174.117	0.208986	0.351421	0.59469	0.552051	0.785944
2610034B18Rik	661.418	0.0164678	0.225534	0.0730172	0.941792	0.97926
2610035D17Rik	172.818	-0.728866	0.453799	-1.60614	0.108242	0.316235
2610037D02Rik	44.0098	-0.157711	0.557268	-0.283008	0.77717	0.908154
2610039C10Rik	279.061	-0.546861	0.269736	-2.02739	0.0426222	0.172448
2610044O15Rik	472.736	-0.121273	0.206315	-0.587805	0.556663	0.78889
2610100L16Rik	3.24078	0.469536	1.38432	0.339181	0.734473	NA
2610101N10Rik	1230.63	0.250945	0.159582	1.57251	0.115831	0.330206
2610109H07Rik	6.18888	-0.565852	1.69854	-0.33314	0.739028	0.893446
2610203C20Rik	72.6664	-0.412245	0.828636	-0.497498	0.618838	0.830482
2610203C22Rik	2.92467	0.0312373	2.18824	0.0142751	0.98861	NA
2610204G22Rik	6.84554	-1.61788	1.53416	-1.05457	0.29162	0.567146
2610206C17Rik	44.856	-0.206294	0.456627	-0.451777	0.651429	0.847886
2610301B20Rik	576.899	0.550874	0.26627	2.06885	0.0385598	0.161479
2610301G19Rik	1469.44	0.0556446	0.175568	0.316941	0.751288	0.898851
2610305D13Rik	16.6665	4.56738	1.91512	2.3849	0.0170836	0.0923954
2610306M01Rik	115.127	-0.508839	0.379889	-1.33944	0.180427	0.42861
2610307P16Rik	91.7653	-2.32225	0.485643	-4.78181	1.73725e-06	6.25605e-05
2610316D01Rik	1.09635	4.04677	3.65441	1.10737	0.268135	NA
2610318N02Rik	14.0782	-1.9403	1.67983	-1.15506	0.248064	0.516879
2610507B11Rik	4537.14	0.172271	0.145975	1.18014	0.237943	0.504552
2610507I01Rik	84.9468	0.014847	0.512022	0.0289969	0.976867	0.992591
2610524H06Rik	469.059	0.234517	0.180524	1.29909	0.193913	0.44823
2610528A11Rik	3.74955	0.827082	2.44932	0.337678	0.735606	0.893176
2610528E23Rik	195.443	-0.345056	0.256289	-1.34635	0.178189	0.425222
2610528J11Rik	561.466	-0.177629	0.173785	-1.02212	0.306724	0.583638
2700007P21Rik	377.657	-0.0487172	0.213785	-0.227879	0.81974	0.928669
2700023E23Rik	102.784	0.105157	0.572932	0.183542	0.854373	0.943855
2700029M09Rik	417.475	-0.118347	0.241864	-0.489314	0.624619	0.833996
2700038G22Rik	162.812	-0.53725	0.386484	-1.39009	0.1645	0.406715
2700046G09Rik	31.7082	0.834236	0.683125	1.22121	0.222008	0.48404
2700049A03Rik	336.112	-0.41736	0.293084	-1.42403	0.154437	0.393057
2700050L05Rik	728.515	-0.423806	0.320204	-1.32355	0.185653	0.436681
2700054A10Rik	41.7853	0.628681	0.664153	0.94659	0.343848	0.62144
2700060E02Rik	1797.58	0.00470617	0.140309	0.0335415	0.973243	0.99105
2700062C07Rik	292.977	0.0830849	0.306361	0.271199	0.786238	0.911459
2700069I18Rik	12.342	-0.037942	0.978862	-0.0387613	0.969081	0.989372
2700070H01Rik	30.5365	-0.0650516	0.595213	-0.109291	0.912972	0.967623
2700078E11Rik	670.019	-0.243807	0.184211	-1.32352	0.185662	0.436681
2700081L22Rik	1.7712	-3.53646	3.40305	-1.0392	0.298711	NA
2700081O15Rik	55.0053	0.592794	0.421078	1.4078	0.15919	0.39953
2700089E24Rik	1504.08	-0.369484	0.170601	-2.16577	0.0303288	0.137182
2700089I24Rik	11.171	0.253316	1.19259	0.212409	0.831788	0.934341
2700090O03Rik	1.246	2.15514	3.59	0.600318	0.548295	NA
2700094K13Rik	978.16	-0.169737	0.217746	-0.779518	0.435675	0.703094
2700097O09Rik	311.921	-0.237875	0.23777	-1.00044	0.317098	0.594003
2700099C18Rik	38.7243	-0.41022	0.88169	-0.465265	0.641741	0.84398
2810001G20Rik	92.2655	0.178058	0.419805	0.424144	0.671461	0.859272
2810002D19Rik	60.0449	-0.702365	0.416444	-1.68658	0.0916844	0.28491
2810002N01Rik	577.532	-0.0245789	0.246476	-0.0997215	0.920565	0.971146
2810004N23Rik	693.338	-0.493856	0.1798	-2.7467	0.00601978	0.043752
2810006K23Rik	269.199	-0.209311	0.315084	-0.664303	0.506497	0.754013
2810008D09Rik	262.574	0.29555	0.293812	1.00592	0.314455	0.591789
2810008M24Rik	1440.01	-0.240714	0.163009	-1.47669	0.13976	0.370636
2810013P06Rik	294.495	-0.18124	0.331914	-0.546044	0.585036	0.809318
2810021B07Rik	680.999	-0.268311	0.195678	-1.37119	0.170316	0.414881
2810021J22Rik	262.784	0.151691	0.265346	0.571674	0.567543	0.796753
2810025M15Rik	136.191	2.23958	0.679648	3.29521	0.000983499	0.0110945
2810029C07Rik	36.7474	-2.49575	1.00328	-2.4876	0.0128609	0.0754541
2810030E01Rik	53.563	-1.47872	0.883975	-1.67281	0.0943652	0.290275
2810032G03Rik	10.1501	1.49734	2.09045	0.716275	0.473822	0.730954
2810046L04Rik	297.321	-0.293384	0.293253	-1.00045	0.317094	0.594003
2810047C21Rik1	178.338	-2.65446	0.699625	-3.79412	0.000148167	0.00247208
2810049E08Rik	17.4929	0.0158898	0.640443	0.0248106	0.980206	0.993885
2810055F11Rik	29.459	-0.68645	0.707742	-0.969917	0.332088	0.610216
2810055G20Rik	65.1384	-1.12256	0.513874	-2.1845	0.0289254	0.133142
2810403A07Rik	1926.76	-0.327481	0.186242	-1.75836	0.0786855	0.258126
2810403D21Rik	29.7846	0.443176	0.556868	0.795837	0.426127	0.694731
2810405K02Rik	181.797	-0.470245	0.306779	-1.53285	0.125314	0.346535
2810407C02Rik	974.527	-0.0563906	0.151286	-0.372742	0.70934	0.879739
2810408A11Rik	138.705	0.399591	0.415308	0.962154	0.335972	0.613296
2810408I11Rik	16.7081	0.00127117	0.830061	0.00153142	0.998778	0.999737
2810408M09Rik	449.958	-0.570621	0.238281	-2.39474	0.0166322	0.0905763
2810410L24Rik	25.2519	-0.619718	0.630115	-0.983501	0.325361	0.603024
2810417H13Rik	139.413	0.143232	0.529204	0.270655	0.786656	0.911492
2810422J05Rik	767.132	0.0245671	0.207305	0.118507	0.905666	0.964858
2810422O20Rik	108.667	0.382621	0.29969	1.27672	0.2017	0.458178
2810428I15Rik	797.833	-0.201221	0.16432	-1.22457	0.220736	0.482155
2810429I04Rik	1.29067	-0.571346	2.09724	-0.272428	0.785293	NA
2810432D09Rik	301.227	0.403205	0.323665	1.24575	0.212857	0.472995
2810432L12Rik	1058.11	1.1508	0.296813	3.87718	0.000105675	0.00187457
2810433D01Rik	27.126	-0.0633667	0.633903	-0.0999629	0.920374	0.971146
2810442I21Rik	3.76771	-1.83582	1.94273	-0.944968	0.344675	0.622151
2810442N19Rik	3.28661	-4.07025	2.73807	-1.48654	0.137137	NA
2810453I06Rik	185.146	0.270516	0.30762	0.879384	0.379193	0.654551
2810454H06Rik	45.272	-0.304677	0.653137	-0.466483	0.64087	0.843919
2810459M11Rik	235.032	-0.845527	0.413022	-2.04717	0.0406413	0.16756
2810474O19Rik	4142.65	0.6786	0.147027	4.61549	3.92176e-06	0.000128706
2900002K06Rik	7.66692	0.916108	1.17077	0.782485	0.43393	0.701346
2900005J15Rik	203.67	0.324513	0.38934	0.833496	0.404565	0.678266
2900006K08Rik	45.5191	0.457925	0.725635	0.631068	0.527996	0.769537
2900008C10Rik	5.03128	0.916062	1.52196	0.601897	0.547243	0.783174
2900009J06Rik	14.0802	0.586168	1.14331	0.512696	0.608164	0.823842
2900010M23Rik	976.913	-0.038621	0.184323	-0.209529	0.834035	0.935133
2900011O08Rik	0.954696	-0.635254	3.62361	-0.17531	0.860836	NA
2900026A02Rik	857.528	-0.0715675	0.287279	-0.249122	0.803266	0.920938
2900041M22Rik	2.39111	1.25296	2.61959	0.478305	0.632433	NA
2900053A13Rik	492.785	-0.0294356	0.183284	-0.160601	0.872408	0.951434
2900056M20Rik	185.256	-0.268671	0.391201	-0.686786	0.492218	0.743817
2900060B14Rik	80.8849	-0.759237	0.459883	-1.65093	0.0987522	0.299122
2900064A13Rik	1873.63	0.216585	0.184023	1.17694	0.239218	0.506199
2900076A07Rik	96.6699	-0.164597	0.490102	-0.335842	0.73699	0.893389
2900079G21Rik	1.6643	-0.775811	2.9764	-0.260654	0.794359	NA
2900092E17Rik	439.425	-0.203351	0.223595	-0.909461	0.363107	0.640228
2900093L17Rik	3.19672	0.237417	2.32508	0.102111	0.918668	NA
2900097C17Rik	8038.21	0.0968773	0.178195	0.543658	0.586677	0.810391
3000002C10Rik	39.5283	-0.931416	0.77689	-1.1989	0.230566	0.495065
3010026O09Rik	105.646	-0.491084	0.472482	-1.03937	0.298632	0.574429
3110001D03Rik	350.971	0.189709	0.264285	0.717821	0.472868	0.730104
3110001I22Rik	92.0272	-0.0498379	0.389293	-0.128021	0.898132	0.961499
3110002H16Rik	889.562	-0.531091	0.216848	-2.44914	0.0143196	0.0814311
3110003A17Rik	705.187	-0.157885	0.209406	-0.753966	0.45087	0.713794
3110007F17Rik	4.97282	-0.183853	1.99418	-0.0921947	0.926543	0.974033
3110009E18Rik	57.216	-0.204469	0.429635	-0.475912	0.634137	0.83973
3110009F21Rik	14.4382	-2.81897	1.75238	-1.60865	0.107692	0.315621
3110015C05Rik	18.1719	-1.43533	0.925698	-1.55053	0.121013	0.339233
3110021A11Rik	17.8474	0.183335	0.847128	0.21642	0.828661	0.932932
3110021N24Rik	86.9278	0.580771	0.37088	1.56593	0.117365	0.332913
3110035E14Rik	3.20147	0	3.81694	0	1	NA
3110040N11Rik	250.696	-0.0965712	0.280855	-0.343848	0.730961	0.890609
3110043O21Rik	463.467	0.432164	0.23547	1.83533	0.0664571	0.231061
3110045C21Rik	6.12828	-3.00881	2.66927	-1.1272	0.259656	0.53075
3110052M02Rik	182.183	0.489248	0.32798	1.4917	0.135778	0.363852
3110056K07Rik	107.157	-0.214975	0.505589	-0.425197	0.670693	0.85885
3110056O03Rik	754.899	0.190129	0.244109	0.778871	0.436056	0.703212
3110057O12Rik	91.9545	-0.965534	0.446514	-2.16238	0.0305887	0.137926
3110062M04Rik	233.555	-0.377699	0.249293	-1.51508	0.129752	0.35352
3110070M22Rik	10.4365	0.152902	1.28918	0.118604	0.905589	0.964858
3110082I17Rik	432.921	0.119954	0.249934	0.479943	0.631268	0.837906
3110099E03Rik	10.5951	1.37825	0.884872	1.55757	0.119336	0.336507
3200001D21Rik	28.6274	0.514503	0.582921	0.882628	0.377437	0.65322
3200002M19Rik	237.04	0.338826	0.186298	1.81874	0.0689516	0.237247
3230401D17Rik	1836.92	0.0539269	0.120376	0.447988	0.654162	0.849245
3300002I08Rik	30.4958	0.493058	0.647722	0.761219	0.446526	0.711376
3300005D01Rik	3.15872	-2.9408	2.4496	-1.20052	0.229937	NA
3632451O06Rik	2.12545	-5.02658	3.69441	-1.36059	0.173643	NA
3632454L22Rik	18.393	0.0760141	0.89815	0.0846341	0.932552	0.976156
3830403N18Rik	1.53008	-0.590483	2.35742	-0.250478	0.802217	NA
3830406C13Rik	530.358	-0.261128	0.203475	-1.28334	0.199374	0.454841
3830408C21Rik	28.942	-0.00776674	0.856041	-0.00907286	0.992761	0.997451
3830431G21Rik	661.236	-1.1622	0.34299	-3.38844	0.000702917	0.00848243
3930402G23Rik	13.1293	-2.51911	1.42654	-1.76589	0.0774145	0.255432
4430402I18Rik	31.2807	-0.456734	0.65629	-0.695932	0.486471	0.73991
4632411B12Rik	1136.52	0.108078	0.188272	0.574054	0.565931	0.795261
4632415K11Rik	376.572	-0.00569664	0.338193	-0.0168443	0.986561	0.995506
4632415L05Rik	472.299	-0.219368	0.207118	-1.05915	0.289532	0.564973
4632427E13Rik	132.194	-0.251412	0.361648	-0.695185	0.48694	0.740341
4632428C04Rik	57.2565	-0.793535	0.407847	-1.94567	0.0516944	0.19619
4632428N05Rik	65.093	3.19972	1.16148	2.75488	0.00587145	0.0429682
4632434I11Rik	45.1	0.254174	0.591833	0.429469	0.667582	0.857479
4732415M23Rik	16.6064	-0.620331	0.794266	-0.781011	0.434796	0.702318
4732416N19Rik	1.15581	0.0770133	3.08034	0.0250016	0.980054	NA
4732418C07Rik	1169.33	0.0602941	0.121904	0.494604	0.62088	0.831401
4732456N10Rik	4.93357	6.22231	3.63592	1.71135	0.0870172	0.2759
4732471D19Rik	199.807	-0.00818723	0.402389	-0.0203466	0.983767	0.995124
4732471J01Rik	28.9971	-0.475303	0.65782	-0.722543	0.469961	0.727732
4732490B19Rik	15.3258	-2.66817	1.11764	-2.38733	0.0169711	0.0918652
4732491K20Rik	36.2508	0.460076	0.666299	0.690496	0.489883	0.742262
4831426I19Rik	21.2442	0.206185	0.70037	0.294394	0.768457	0.904966
4831440E17Rik	49.7472	-0.567842	0.532608	-1.06615	0.286354	0.562083
4832428D23Rik	4.42253	0.977616	2.02389	0.483038	0.629069	0.8364
4833403I15Rik	11.711	-1.97576	1.78407	-1.10745	0.268101	0.541543
4833412C05Rik	1.5698	1.98005	3.50292	0.565258	0.571899	NA
4833417C18Rik	41.6023	0.670085	0.495169	1.35324	0.175978	0.422479
4833418N02Rik	67.4443	0.163076	0.584532	0.278986	0.780255	0.909431
4833419F23Rik	11.7336	1.55525	1.30985	1.18735	0.235091	0.5009
4833420G17Rik	705.346	-0.0703341	0.341352	-0.206045	0.836755	0.936613
4833422C13Rik	13.0111	-0.632764	0.902666	-0.700995	0.483306	0.737281
4833423E24Rik	5.90034	6.48165	2.29025	2.8301	0.00465332	0.036254
4833427F10Rik	32.0009	-0.131866	0.764039	-0.17259	0.862974	0.946832
4833427G06Rik	43.3407	0.205456	0.598929	0.343039	0.731569	0.890767
4833439L19Rik	3515.74	-0.0173045	0.100261	-0.172595	0.86297	0.946832
4833442J19Rik	715.368	0.922514	0.27752	3.32414	0.00088692	0.0102002
4921504E06Rik	2.45162	1.48186	3.54625	0.417868	0.676044	NA
4921506M07Rik	56.8656	-0.263559	0.597405	-0.441173	0.659088	0.852274
4921507L20Rik	6.17204	-0.690887	1.03027	-0.670589	0.502482	0.751512
4921507P07Rik	89.6997	-2.10755	0.498737	-4.22578	2.38114e-05	0.000569077
4921508A21Rik	102.637	0.256008	0.345353	0.741293	0.458516	0.719814
4921509C19Rik	2.11704	-2.32394	2.80443	-0.828666	0.407293	NA
4921511C10Rik	11.1447	0.164572	1.03487	0.159027	0.873648	0.951804
4921513D23Rik	303.77	-0.183271	0.258976	-0.707676	0.479147	0.734384
4921513I03Rik	23.1801	0.218888	0.696799	0.314133	0.75342	0.899773
4921515E04Rik	83.7724	0.284921	0.396069	0.719373	0.471911	0.729405
4921515J06Rik	9.96604	-1.44096	1.62564	-0.886396	0.375404	0.65126
4921517D22Rik	2.32678	-0.353018	2.26264	-0.15602	0.876017	NA
4921517L17Rik	27.5229	-0.458999	0.693637	-0.661728	0.508146	0.755126
4921523A10Rik	18.3208	-0.213832	0.685644	-0.311871	0.755138	0.900456
4921524J17Rik	319.141	-0.216397	0.249554	-0.867133	0.385869	0.66099
4921525B02Rik	5.04954	0.226571	1.78595	0.126864	0.899048	0.961962
4921530D09Rik	2.15584	-0.863666	1.87192	-0.46138	0.644526	NA
4921530L18Rik	22.4949	0.100469	0.70738	0.142029	0.887057	0.957126
4921531C22Rik	147.911	-0.217731	0.324002	-0.672005	0.501581	0.750767
4921536K21Rik	15.3308	-0.455714	0.963429	-0.473013	0.636204	0.840789
4922501C03Rik	289.514	0.463062	0.368009	1.25829	0.208287	0.466844
4922501L14Rik	54.8935	-0.141034	0.694026	-0.203211	0.83897	0.937509
4922505G16Rik	4.15261	-0.000424205	1.47464	-0.000287667	0.99977	0.999948
4930402F11Rik	1.38544	0.580759	2.23447	0.259909	0.794934	NA
4930402H24Rik	649.08	-0.528238	0.251376	-2.10139	0.0356071	0.152736
4930404I05Rik	6.08285	-0.470085	1.89081	-0.248616	0.803658	0.921196
4930404N11Rik	61.7042	0.455057	0.415626	1.09487	0.273572	0.548075
4930405A21Rik	3.98061	0.563298	1.44411	0.390066	0.696487	0.873965
4930405P13Rik	227.916	0.0373608	0.429983	0.0868889	0.93076	0.975242
4930412B13Rik	1.28387	-3.2101	3.67014	-0.874653	0.381763	NA
4930412C18Rik	10.6799	0.429147	1.92075	0.223426	0.823204	0.930617
4930413F20Rik	32.8456	0.921099	0.496482	1.85525	0.0635605	0.224272
4930413G21Rik	76.8761	0.0747552	0.404414	0.184848	0.853348	0.943362
4930414L22Rik	268.29	-0.342861	0.283838	-1.20795	0.227068	0.490932
4930415O20Rik	1.25305	1.44034	3.59453	0.400703	0.688639	NA
4930417G10Rik	3.88741	-5.37546	3.50897	-1.53192	0.125542	0.346889
4930417O22Rik	5.42817	0.792701	1.40029	0.566099	0.571326	0.799233
4930420K17Rik	2611.57	0.126222	0.26413	0.477879	0.632736	0.838787
4930422G04Rik	66.6152	0.0757593	0.556053	0.136245	0.891628	0.958817
4930425O10Rik	4.91968	-0.4527	1.35465	-0.334183	0.738241	0.893389
4930427A07Rik	257.559	-0.424559	0.323268	-1.31333	0.189071	0.441466
4930429B21Rik	21.6946	-1.11014	0.936738	-1.18511	0.235972	0.501926
4930429D17Rik	2.18136	-1.31412	2.04228	-0.643455	0.519929	NA
4930429F24Rik	13.6989	-0.508471	0.899103	-0.565532	0.571712	0.799292
4930430F08Rik	151.083	-0.45844	0.421817	-1.08682	0.277115	0.551632
4930431P03Rik	8.91957	1.00717	1.07106	0.94035	0.347038	0.624178
4930432J09Rik	16.1989	0.15787	0.74757	0.211177	0.832749	0.934345
4930432K21Rik	42.9	-0.590365	0.663149	-0.890246	0.373334	0.649175
4930433N12Rik	4.68956	-0.209128	1.63726	-0.12773	0.898362	0.961552
4930440C22Rik	1.46376	-0.089122	2.65305	-0.0335922	0.973202	NA
4930441O14Rik	21.3589	-0.780541	1.30861	-0.596465	0.550865	0.785213
4930443O20Rik	1.8791	-1.6585	3.59303	-0.461588	0.644377	NA
4930444A02Rik	716.3	-0.476541	0.213212	-2.23505	0.0254138	0.122582
4930444F02Rik	0.933585	0.501397	3.63404	0.137973	0.890262	NA
4930444G20Rik	6.75523	0.0706876	1.29527	0.0545736	0.956478	0.985057
4930444M15Rik	1.03924	1.96206	3.31047	0.592684	0.553393	NA
4930444P10Rik	11.2626	0.301683	1.2055	0.250256	0.802389	0.920279
4930448I06Rik	5.1735	0.905189	1.29753	0.697626	0.485411	0.739365
4930451C15Rik	197.932	-0.213191	0.342142	-0.623105	0.533216	0.773413
4930452B06Rik	136.194	-0.243974	0.389977	-0.625612	0.531569	0.772552
4930453N24Rik	776.682	-0.0155427	0.189016	-0.0822298	0.934464	0.976777
4930455C13Rik	5.52506	-0.276755	1.21017	-0.228691	0.819109	0.928463
4930455C21Rik	176.259	0.452895	0.45676	0.991539	0.321423	0.598372
4930455F23Rik	467.862	-0.15385	0.291846	-0.527161	0.598082	0.816859
4930455H04Rik	4.7154	-1.1558	1.92463	-0.600531	0.548152	0.783552
4930461G14Rik	4.8666	4.53704	2.92243	1.55249	0.120545	0.338458
4930465K10Rik	3.9865	0.667263	2.04834	0.325758	0.744608	0.895769
4930467E23Rik	7.4513	-0.184412	2.30096	-0.0801458	0.936121	0.977045
4930470H14Rik	972.753	0.0314641	0.353183	0.0890872	0.929013	0.974368
4930471I20Rik	2.64065	-0.93853	1.99326	-0.470852	0.637746	NA
4930471M23Rik	416.652	-0.00527338	0.244065	-0.0216065	0.982762	0.994949
4930473A02Rik	3.45859	-0.911258	1.3191	-0.690817	0.48968	0.742092
4930473A06Rik	99.467	-0.362054	0.413384	-0.87583	0.381122	0.6566
4930474G06Rik	21.1605	-0.110601	0.711813	-0.155379	0.876523	0.952718
4930478L05Rik	4.71587	-1.02631	2.22464	-0.461335	0.644558	0.845479
4930479D17Rik	1.75297	0.0826806	3.56062	0.0232208	0.981474	NA
4930481A15Rik	26.7941	-0.254446	0.762656	-0.333632	0.738657	0.893389
4930483J18Rik	1.3611	-4.39346	3.70336	-1.18634	0.235486	NA
4930483K19Rik	5.45113	0.235552	1.47353	0.159856	0.872995	0.951659
4930483O08Rik	7.31592	-1.15843	1.62738	-0.71184	0.476564	0.732825
4930487H11Rik	1.73149	-0.0460714	3.49257	-0.0131913	0.989475	NA
4930488B22Rik	11.2009	0.205114	0.931201	0.220268	0.825662	0.931573
4930500J02Rik	19.4029	0.349049	0.762133	0.45799	0.646959	0.846866
4930502A04Rik	2.36973	-0.863543	2.85567	-0.302396	0.76235	NA
4930502E09Rik	2.69045	0.362256	2.53219	0.14306	0.886242	NA
4930502E18Rik	5.98871	3.58717	2.30312	1.55753	0.119345	0.336507
4930503L19Rik	24.5359	0.546308	0.640544	0.852883	0.393724	0.668208
4930505A04Rik	9.22847	-1.55502	1.21187	-1.28316	0.199436	0.454853
4930506M07Rik	884.498	-0.335708	0.236046	-1.42221	0.154965	0.393707
4930507D05Rik	11.3632	-1.38916	0.928619	-1.49595	0.134668	0.362192
4930509E16Rik	5.34931	-0.897545	1.36802	-0.656091	0.511765	0.758028
4930509J09Rik	1.05706	0.335477	2.63969	0.12709	0.89887	NA
4930509K18Rik	2.07376	-1.75984	2.43038	-0.724101	0.469003	NA
4930511A02Rik	1.87443	-2.34602	2.433	-0.964248	0.334922	NA
4930511M06Rik	418.196	-0.010441	0.359379	-0.0290528	0.976822	0.992591
4930511M11Rik	0.988409	1.38446	3.24402	0.426774	0.669544	NA
4930512B01Rik	4.73421	0.0539403	1.25119	0.0431113	0.965613	0.987913
4930513D17Rik	4.62787	2.6964	1.89009	1.4266	0.153695	0.39202
4930513N10Rik	20.7208	-1.49596	0.906286	-1.65065	0.09881	0.299174
4930515G01Rik	11.5685	-0.299566	1.2335	-0.242859	0.808114	0.923021
4930519F09Rik	113.683	0.0846861	0.545773	0.155167	0.876689	0.952835
4930519H02Rik	5.33878	-0.316996	1.88126	-0.168502	0.866189	0.948182
4930520O04Rik	6.34235	3.54545	1.61188	2.19958	0.0278369	0.130088
4930520P13Rik	1.30369	-1.04046	2.72744	-0.381478	0.702849	NA
4930523C07Rik	2339.99	0.63403	0.18915	3.352	0.000802304	0.00945946
4930524L23Rik	6.29155	-2.44481	2.3064	-1.06001	0.289141	0.56465
4930525D18Rik	1.90207	-0.396688	2.48803	-0.159439	0.873323	NA
4930525G20Rik	22.7786	0.928611	0.97376	0.953634	0.340269	0.61754
4930526L06Rik	11.1437	0.186391	0.815106	0.228671	0.819125	0.928463
4930528A17Rik	28.8997	0.811066	0.713771	1.13631	0.255826	0.526261
4930528D03Rik	29.0753	0.336411	0.797041	0.422075	0.672971	0.860168
4930529M08Rik	30.5472	-0.445437	0.650429	-0.684835	0.493448	0.744789
4930533B01Rik	1.43324	0.054648	3.41777	0.0159894	0.987243	NA
4930534B04Rik	155.645	-0.32003	0.530485	-0.603277	0.546324	0.782464
4930538K18Rik	6.14595	0.890649	2.10369	0.423375	0.672022	0.859507
4930539E08Rik	57.4715	0.288012	0.537702	0.535635	0.592211	0.81354
4930539J05Rik	28.4684	-0.615808	0.516881	-1.19139	0.2335	0.499009
4930544O15Rik	2.35614	2.39501	2.6744	0.895533	0.370502	NA
4930545H06Rik	3.13305	0.980075	1.68787	0.580659	0.56147	NA
4930545L23Rik	3.47526	1.35356	1.65961	0.815588	0.414736	0.685766
4930546K05Rik	19.1597	-0.74155	0.702352	-1.05581	0.291055	0.566713
4930547N16Rik	47.5563	-0.789276	1.16982	-0.674697	0.499869	0.749053
4930548H24Rik	0.968474	3.88058	3.6573	1.06105	0.288667	NA
4930548J01Rik	1.95101	2.91326	2.69634	1.08045	0.279942	NA
4930549G23Rik	19.7483	-0.163349	0.768623	-0.212521	0.831701	0.934341
4930550C14Rik	33.4469	-1.94538	0.75031	-2.59277	0.00952068	0.0614022
4930552P12Rik	4.71477	4.98669	3.64305	1.36882	0.171055	0.415931
4930555I21Rik	6.17125	0.675631	1.61951	0.417182	0.676545	0.862521
4930556M19Rik	266.793	-0.800602	0.327415	-2.44522	0.0144764	0.0820644
4930557A04Rik	2.10401	4.99151	3.64301	1.37016	0.170637	NA
4930558C23Rik	1.7651	0.438412	3.48525	0.125791	0.899898	NA
4930558J18Rik	18.6377	0.986195	0.906088	1.08841	0.276414	0.550925
4930562C15Rik	270.388	0.177373	0.37482	0.473221	0.636056	0.840789
4930562F07Rik	252.824	0.163714	0.360661	0.453927	0.649881	0.847724
4930563E18Rik	7.63075	0.523568	1.05367	0.4969	0.619259	0.830482
4930563E22Rik	40.5742	0.0524243	0.73123	0.0716934	0.942846	0.979888
4930563M20Rik	5.73858	0.8146	1.15567	0.70487	0.480891	0.735429
4930564K09Rik	12.7246	-0.128567	1.24423	-0.103331	0.917701	0.970116
4930565N06Rik	7.57805	1.45887	1.06644	1.36799	0.171315	0.416117
4930568E12Rik	1.49903	1.5426	2.20629	0.699181	0.484439	NA
4930568K20Rik	5.45206	1.24098	2.09848	0.591371	0.554272	0.787076
4930572J05Rik	335.149	0.368512	0.265545	1.38776	0.165211	0.407581
4930578C19Rik	1.72771	2.66067	3.64855	0.72924	0.465855	NA
4930578E11Rik	1.40127	0.519454	2.63334	0.19726	0.843624	NA
4930578M01Rik	2.68298	2.70822	2.25224	1.20245	0.229188	NA
4930578N16Rik	53.2821	0.536912	0.473866	1.13305	0.257195	0.527956
4930579C15Rik	2.78319	1.33847	2.59926	0.514943	0.606593	NA
4930579G18Rik	28.6326	-0.328653	0.641935	-0.511972	0.60867	0.823967
4930579G22Rik	20.6942	-0.360667	0.685738	-0.525954	0.59892	0.817538
4930579G24Rik	93.1704	0.253351	0.508244	0.498482	0.618144	0.830156
4930579K19Rik	22.8407	0.883077	0.652553	1.35327	0.175971	0.422479
4930581F22Rik	86.6601	-0.165478	0.444878	-0.371963	0.709921	0.879946
4930583H14Rik	3.02339	-0.461716	2.62227	-0.176075	0.860235	NA
4930583K01Rik	1.57126	3.70692	2.72241	1.36163	0.173315	NA
4930588N13Rik	14.2846	1.31126	1.58038	0.829711	0.406702	0.679559
4930592I03Rik	2.63776	2.42022	2.60429	0.929319	0.352724	NA
4930593C16Rik	2.17799	0.193061	2.42641	0.0795666	0.936582	NA
4930594C11Rik	29.5475	1.19978	0.823168	1.45751	0.144976	0.379037
4930599N23Rik	5.43585	-0.664214	1.44147	-0.460791	0.644948	0.845535
4931402G19Rik	18.2282	-0.488561	0.755038	-0.647068	0.517588	0.762254
4931403G20Rik	12.5069	-0.415843	1.05482	-0.394231	0.693411	0.87194
4931406B18Rik	5.92739	-0.0657125	1.15377	-0.0569545	0.954581	0.984391
4931406C07Rik	344.213	0.3443	0.246608	1.39614	0.162672	0.404262
4931406H21Rik	113.947	0.264762	0.573876	0.461358	0.644542	0.845479
4931406P16Rik	1089.77	0.367147	0.218984	1.67659	0.0936227	0.288629
4931408A02Rik	565.087	0.71807	0.306721	2.34112	0.019226	0.100698
4931408D14Rik	91.2027	-0.598727	0.576128	-1.03923	0.2987	0.574429
4931414P19Rik	51.8076	0.0237555	0.591947	0.0401311	0.967989	0.988846
4931417G12Rik	1.65047	-1.26145	2.60821	-0.483645	0.628638	NA
4931420L22Rik	9.99905	0.108242	1.06608	0.101533	0.919128	0.970529
4931423N10Rik	2.41169	3.67951	3.64925	1.00829	0.313315	NA
4931428F04Rik	161.495	0.560281	0.456688	1.22684	0.219885	0.481217
4931428L18Rik	20.089	-0.209143	0.684808	-0.305404	0.760059	0.902308
4931429I11Rik	19.8552	-0.815119	0.990261	-0.823136	0.410431	0.682386
4931429L15Rik	4.58011	-0.859932	1.34499	-0.639359	0.522589	0.765719
4931430N09Rik	4.67045	-5.03307	2.25392	-2.23303	0.0255469	0.123035
4931431C16Rik	15.6439	1.0783	0.890876	1.21038	0.226133	0.489641
4931440F15Rik	3.27622	-2.42646	3.03022	-0.800752	0.423275	NA
4931440J10Rik	1.12736	-1.24869	2.37616	-0.525509	0.59923	NA
4931440P22Rik	36.2289	0.100203	0.519325	0.192947	0.847	0.941591
4932411E22Rik	7.04775	0.165993	2.05004	0.0809707	0.935465	0.976777
4932411L15	1499.86	-0.0935198	0.287473	-0.325316	0.744942	0.895968
4932412D23Rik	1.50532	0.838262	3.00622	0.278842	0.780366	NA
4932412H11Rik	2.33062	0.166918	2.29281	0.0728006	0.941965	NA
4932414N04Rik	11.6011	0.776079	0.843665	0.91989	0.35763	0.634817
4932415G12Rik	82.7791	0.427331	0.531433	0.80411	0.421333	0.690617
4932416H05Rik	131.233	-0.00262975	0.348384	-0.00754842	0.993977	0.998116
4932416K20Rik	0.963241	1.79761	3.16814	0.567402	0.570441	NA
4932418E24Rik	20.9384	-2.48738	1.22429	-2.0317	0.0421839	0.171111
4932425I24Rik	77.2721	-0.825224	0.745997	-1.1062	0.268639	0.542148
4932438A13Rik	1568.98	0.0643704	0.197225	0.32638	0.744137	0.895736
4932438H23Rik	3.70404	-0.897233	1.71581	-0.52292	0.60103	0.818777
4932443I19Rik	6.26326	-1.75078	1.47719	-1.18521	0.235936	0.501924
4933400F21Rik	17.4927	1.63101	1.08992	1.49645	0.134538	0.361974
4933401D09Rik	7.11292	0.811277	1.14268	0.709975	0.477719	0.733613
4933401H06Rik	1.44061	-0.243329	2.57182	-0.0946136	0.924622	NA
4933402N22Rik	1.87658	0.0932509	3.33584	0.0279542	0.977699	NA
4933403F05Rik	1075.19	-0.512645	0.154064	-3.32749	0.000876337	0.0101132
4933403G14Rik	79.2394	0.0375976	0.617391	0.0608976	0.951441	0.982808
4933404K08Rik	17.2369	-0.055072	0.656912	-0.0838346	0.933188	0.976189
4933404M02Rik	175.901	-0.865268	0.389186	-2.22328	0.0261973	0.125295
4933404O12Rik	98.4285	0.066983	0.492036	0.136134	0.891715	0.958817
4933405D12Rik	17.5744	0.100858	0.684795	0.147282	0.882909	0.955419
4933406C10Rik	16.3828	-1.02844	0.868328	-1.18439	0.236257	0.502271
4933407C03Rik	1423.22	0.082298	0.212403	0.387462	0.698414	0.875076
4933407G14Rik	12.9674	0.000911808	0.866409	0.0010524	0.99916	0.999737
4933407H18Rik	363.475	0.0689943	0.195457	0.35299	0.724096	0.886631
4933407K13Rik	153.385	-0.250913	0.589175	-0.425872	0.670201	0.858697
4933407L21Rik	2.22751	0.720599	2.06542	0.348887	0.727174	NA
4933408B17Rik	10.8705	0.416097	0.890311	0.467362	0.640241	0.843672
4933408J17Rik	3.02396	0.316363	1.5112	0.209346	0.834178	NA
4933408N05Rik	76.7707	0.0832167	0.407705	0.20411	0.838267	0.93713
4933409K07Rik	1653.03	-0.0729669	0.205185	-0.355615	0.722129	0.885321
4933411E08Rik	17.8391	0.301009	0.913063	0.329669	0.74165	0.894611
4933411K16Rik	2.89659	-0.90176	2.91046	-0.309834	0.756687	NA
4933411K20Rik	470.051	-0.276257	0.188096	-1.4687	0.141914	0.373918
4933412E12Rik	59.2616	1.67504	0.561569	2.98278	0.00285643	0.0251331
4933413J09Rik	26.6037	2.07436	0.842202	2.46302	0.0137772	0.0792811
4933413L06Rik	11.3847	0.0497012	1.05991	0.0468921	0.962599	0.98665
4933416M06Rik	1.86064	0.0818588	2.0657	0.0396276	0.96839	NA
4933416M07Rik	22.7666	0.995837	0.872069	1.14192	0.253485	0.523311
4933417D19Rik	4.70957	-1.36088	1.33243	-1.02135	0.307089	0.583665
4933417O13Rik	2.81848	-5.32992	3.55805	-1.49799	0.134136	NA
4933421E11Rik	431.535	-0.291403	0.215966	-1.3493	0.17724	0.42418
4933421O10Rik	216.347	-0.0405685	0.305622	-0.132741	0.894398	0.959776
4933422A05Rik	1.58404	-3.00314	3.44164	-0.872592	0.382885	NA
4933424B01Rik	901.833	-0.429775	0.191483	-2.24445	0.0248032	0.120695
4933424G05Rik	5.03991	-1.00018	2.47536	-0.404056	0.686171	0.868187
4933424G06Rik	1.96382	0.282267	2.9054	0.0971526	0.922605	NA
4933425O20Rik	1.48284	1.47425	3.00991	0.489798	0.624277	NA
4933426D04Rik	8.88699	-1.05178	0.915383	-1.14901	0.250553	0.520295
4933426M11Rik	1671.92	0.435468	0.139749	3.11606	0.00183282	0.0179196
4933427D06Rik	2.81863	0.846608	2.20827	0.38338	0.701438	NA
4933427D14Rik	329.155	0.283339	0.343218	0.825536	0.409067	0.681688
4933427E11Rik	10.2047	0.455223	0.879712	0.517467	0.60483	0.821703
4933427G17Rik	2.59664	2.72354	2.44302	1.11483	0.264924	NA
4933428C19Rik	1.80715	1.04135	2.33136	0.446669	0.655114	NA
4933429O19Rik	3.27329	-0.823892	1.67985	-0.490455	0.623812	NA
4933430H15Rik	315.486	-0.679691	0.644036	-1.05536	0.29126	0.566745
4933430I17Rik	6.21045	-2.41682	1.437	-1.68186	0.0925969	0.286585
4933431E20Rik	189.997	0.315225	0.261314	1.20631	0.227699	0.491562
4933431G14Rik	22.8419	-0.508721	1.09209	-0.465825	0.641341	0.84398
4933432B09Rik	93.3073	-0.0288477	0.484094	-0.0595912	0.952481	0.983499
4933432I09Rik	1.67425	3.89395	3.65705	1.06478	0.286976	NA
4933433C11Rik	4.44912	-0.842241	1.98356	-0.42461	0.671121	0.859058
4933433G15Rik	9.42358	0.614585	1.18269	0.519651	0.603307	0.820685
4933433G19Rik	1.75372	-1.28691	2.77319	-0.464054	0.642609	NA
4933433P14Rik	860.375	-0.0106557	0.234056	-0.0455262	0.963688	0.987448
4933434E20Rik	1472.09	-0.125494	0.180893	-0.693743	0.487843	0.741008
4933436C20Rik	73.4978	0.098161	0.605357	0.162154	0.871185	0.950747
4933437F05Rik	4.94394	-0.113559	1.83374	-0.0619273	0.950621	0.982626
4933438K21Rik	7.57954	0.0310323	1.32987	0.0233347	0.981383	0.994534
4933439C10Rik	169.218	-0.0475928	0.244865	-0.194364	0.845891	0.94095
4933439F18Rik	691.897	-0.272756	0.269068	-1.01371	0.310723	0.587387
4933439K11Rik	18.7322	-1.08771	0.980566	-1.10927	0.267316	0.54085
4933440J02Rik	7.27469	-0.149667	1.1553	-0.129548	0.896924	0.960658
4933440M02Rik	3.7905	-3.11098	2.94505	-1.05634	0.290811	0.566565
5031410I06Rik	2.08264	-4.99821	3.6121	-1.38374	0.166438	NA
5031414D18Rik	4.58873	2.28404	2.75195	0.829969	0.406556	0.679426
5031425E22Rik	345.686	-0.0203443	0.28664	-0.070975	0.943418	0.980047
5031426D15Rik	111.182	0.0780025	0.486897	0.160203	0.872721	0.951575
5031434O11Rik	11.9723	0.372252	0.788878	0.471876	0.637015	0.841512
5031439G07Rik	521.977	1.14366	0.246283	4.64367	3.42272e-06	0.000114213
5033403H07Rik	22.9959	-1.94164	0.727808	-2.66779	0.0076351	0.0520908
5033406O09Rik	106.146	-0.588738	0.306458	-1.9211	0.0547189	0.203769
5033411D12Rik	89.5005	0.241209	0.444175	0.54305	0.587096	0.810501
5033414D02Rik	805.402	-1.31294	0.385867	-3.40257	0.000667564	0.00816727
5133401N09Rik	365.23	-0.298608	0.224348	-1.33101	0.183187	0.432751
5330413P13Rik	17.1968	-1.92291	1.15848	-1.65986	0.0969429	0.295488
5330417C22Rik	2102.29	0.30776	0.283076	1.0872	0.276949	0.551561
5330426P16Rik	106.252	-0.286467	0.533855	-0.536601	0.591544	0.813091
5330437I02Rik	39.2817	1.67198	0.6617	2.52679	0.0115109	0.0701967
5430402O13Rik	6.27998	-1.04804	1.39177	-0.753028	0.451433	0.713976
5430405G05Rik	1.40013	1.14534	3.58317	0.319643	0.749239	NA
5430405H02Rik	239.931	0.0649781	0.315767	0.205778	0.836964	0.936742
5430407P10Rik	1522.13	0.814505	0.205053	3.97217	7.12217e-05	0.00138417
5430411K18Rik	417.533	0.11551	0.270929	0.426347	0.669855	0.858323
5430416N02Rik	161.856	-0.432059	0.309294	-1.39692	0.162437	0.404042
5430416O09Rik	383.405	0.905431	0.389866	2.32242	0.0202106	0.104242
5430417L22Rik	303.921	-0.207658	0.333372	-0.622902	0.533349	0.773413
5430419D17Rik	2.69407	5.34969	3.6403	1.46958	0.141676	NA
5430421F17Rik	21.7551	2.63864	0.987224	2.67278	0.00752246	0.0514768
5430421N21Rik	3.4024	0.226477	1.90614	0.118814	0.905422	NA
5430427M07Rik	7.36207	-0.218357	0.957341	-0.228087	0.819579	0.928567
5430427O19Rik	69.9827	1.30568	0.550875	2.37019	0.0177789	0.0950258
5430428K19Rik	2.34353	0.541194	2.68029	0.201916	0.839982	NA
5430435G22Rik	54.1678	-0.566314	0.973371	-0.581807	0.560697	0.791515
5430437J10Rik	8.67459	0.898632	1.03745	0.866193	0.386384	0.661492
5430437P03Rik	1076.39	-0.126502	0.159307	-0.794073	0.427153	0.695762
5430440P10Rik	8.65803	-1.0426	1.20766	-0.863327	0.387958	0.663045
5530601H04Rik	169.892	0.351515	0.321215	1.09433	0.27381	0.548151
5730403B10Rik	1803.84	0.177874	0.131134	1.35643	0.174964	0.421269
5730403I07Rik	21.7971	-0.00603708	0.640205	-0.00942993	0.992476	0.99737
5730405O15Rik	9.78218	0.845721	1.11615	0.757709	0.448625	0.712485
5730408K05Rik	35.4186	-0.290386	0.573228	-0.506581	0.612449	0.826497
5730409E04Rik	82.7901	-0.20069	0.506404	-0.396305	0.69188	0.871154
5730419I09Rik	563.613	-0.532666	0.197429	-2.69802	0.00697528	0.0489374
5730420D15Rik	50.5569	0.461981	0.435464	1.06089	0.288738	0.564233
5730422E09Rik	8.00077	-2.15058	1.1399	-1.88665	0.059208	0.214088
5730437N04Rik	615.288	0.00274568	0.417677	0.00657368	0.994755	0.998459
5730455O13Rik	208.12	0.0490688	0.250671	0.19575	0.844806	0.940537
5730455P16Rik	603.192	0.238468	0.290698	0.820331	0.412028	0.683293
5730460C07Rik	3.95855	0.142778	1.76213	0.0810256	0.935422	0.976777
5730469M10Rik	7996.13	-0.20591	0.26327	-0.782125	0.434141	0.701475
5730480H06Rik	22.8381	0.127899	0.906161	0.141144	0.887756	0.95741
5730494M16Rik	274.742	0.360081	0.245231	1.46833	0.142015	0.374122
5730494N06Rik	1045.43	0.097235	0.15587	0.623821	0.532745	0.773273
5730507C01Rik	224.204	0.222298	0.277325	0.801578	0.422797	0.691502
5730508B09Rik	647.6	1.11436	0.250095	4.45575	8.36014e-06	0.000241503
5730522E02Rik	1.49849	2.61655	2.83782	0.92203	0.356513	NA
5730528L13Rik	57.8716	1.91357	0.575303	3.32619	0.000880421	0.0101328
5730559C18Rik	1465.23	-0.425185	0.216013	-1.96833	0.0490303	0.189192
5730577I03Rik	105.422	-0.0452821	0.340017	-0.133176	0.894054	0.959702
5730590G19Rik	45.7711	1.30498	1.0074	1.2954	0.195184	0.449567
5830411N06Rik	3.47938	5.72356	3.63809	1.57323	NA	NA
5830415F09Rik	142.379	0.240838	0.420777	0.572366	0.567074	0.796376
5830416P10Rik	89.5591	-2.31983	0.57223	-4.05402	5.03454e-05	0.00105579
5830417I10Rik	1041.83	-0.158545	0.165772	-0.956404	0.338868	0.616219
5830418K08Rik	258.161	-0.0353882	0.313424	-0.112908	0.910103	0.966772
5830418P13Rik	1.69801	1.10533	2.01458	0.548666	0.583235	NA
5830428M24Rik	266.35	0.91801	0.315607	2.90872	0.00362916	0.030008
5830432E09Rik	3.02131	0.221751	1.69639	0.13072	0.895997	NA
5830433M19Rik	283.894	-0.285136	0.247211	-1.15341	0.248741	0.517815
5830473C10Rik	3.53316	-1.2918	1.60127	-0.806735	0.419819	0.689455
5930403L14Rik	259.439	-0.830665	0.301896	-2.75149	0.00593249	0.0433153
5930412G12Rik	7.46664	-0.571074	1.36404	-0.418664	0.675462	0.862055
5930416I19Rik	466.988	-0.561956	0.195157	-2.8795	0.00398302	0.0323241
5930434B04Rik	1034.2	-0.533344	0.135803	-3.92733	8.58939e-05	0.00160091
6030407O03Rik	1.38823	-4.06684	3.48686	-1.16633	0.24348	NA
6030408B16Rik	113.316	0.100631	0.545435	0.184497	0.853624	0.943362
6030419C18Rik	1.23272	0.819008	3.5908	0.228085	0.81958	NA
6030422M02Rik	181.951	0.213837	0.394229	0.542418	0.58753	0.810656
6030429G01Rik	164.823	0.33714	0.446228	0.755532	0.44993	0.71314
6030440G07Rik	14.8964	0.0423709	0.723792	0.0585401	0.953318	0.983796
6030446N20Rik	190.423	0.0632566	0.369228	0.171322	0.863971	0.946965
6030458C11Rik	753.504	-0.163538	0.218752	-0.747596	0.454704	0.717225
6230400D17Rik	28.8437	-0.0665094	0.755845	-0.0879934	0.929882	0.974707
6230409E13Rik	99.1132	1.36787	1.58201	0.864643	0.387235	0.662113
6230427J02Rik	5.32058	1.57657	1.80882	0.871601	0.383426	0.658831
6330403K07Rik	3.59227	-0.918016	3.13265	-0.293047	0.769486	0.905157
6330406I15Rik	256.935	0.785555	0.539255	1.45674	0.145188	0.379467
6330407A03Rik	18.0149	1.10373	1.04005	1.06122	0.288589	0.564181
6330407J23Rik	2.13608	-2.8803	2.90521	-0.991426	0.321477	NA
6330408A02Rik	90.8348	-0.440997	0.512521	-0.860447	0.389543	0.66456
6330409D20Rik	1.02745	3.95779	3.65592	1.08257	0.278999	NA
6330409N04Rik	591.081	0.433556	0.207858	2.08583	0.0369941	0.157106
6330410L21Rik	21.7714	0.332219	0.668316	0.497099	0.619119	0.830482
6330416G13Rik	961.429	-0.248143	0.284825	-0.871213	0.383638	0.658852
6330418K02Rik	27.3884	-1.3397	0.592083	-2.2627	0.0236544	0.11635
6330439K17Rik	128.542	0.363439	0.494764	0.73457	0.462601	0.722085
6330503K22Rik	535.516	-0.325582	0.366826	-0.887565	0.374775	0.650452
6330512M04Rik	25.0005	0.557339	0.704209	0.791439	0.428688	0.696707
6330545A04Rik	4.52305	-0.206176	1.58652	-0.129955	0.896602	0.960658
6330549D23Rik	6.13622	0.89034	1.93651	0.459766	0.645684	0.846151
6330578E17Rik	2248.04	0.334789	0.118671	2.82116	0.00478509	0.0370809
6430527G18Rik	1852.26	-0.360138	0.166721	-2.16012	0.0307636	0.138441
6430531B16Rik	37.1997	1.07685	0.654783	1.6446	0.100053	0.301618
6430548G04	39.1792	0.204984	0.587269	0.349046	0.727054	0.888349
6430548M08Rik	291.373	-0.375632	0.400174	-0.938672	0.347899	0.62479
6430550D23Rik	24.1336	0.23518	0.668348	0.351883	0.724926	0.886991
6430562O15Rik	1.68145	-2.8674	3.486	-0.822547	0.410766	NA
6430571L13Rik	11.1694	1.67534	1.51107	1.10871	0.267554	0.541041
6430573F11Rik	39.159	-0.364825	0.679129	-0.537195	0.591133	0.812965
6430598A04Rik	56.8182	0.455204	0.52617	0.865127	0.386969	0.662015
6430704M03Rik	2.07218	-4.98845	3.69485	-1.35011	0.176981	NA
6430706D22Rik	665.62	0.261845	0.37172	0.704415	0.481175	0.735687
6530401N04Rik	432.601	0.0408453	0.304026	0.134348	0.893127	0.959385
6530402F18Rik	2.52397	-5.27493	3.69184	-1.42881	0.153059	NA
6530418L21Rik	114.419	0.818476	0.636237	1.28643	0.198292	0.45388
6720401G13Rik	1887.5	0.00708704	0.273129	0.0259476	0.979299	0.993587
6720456B07Rik	2485.28	-0.0744125	0.153803	-0.483818	0.628515	0.836181
6720456H20Rik	395.943	-0.224139	0.282528	-0.793335	0.427582	0.696106
6720463M24Rik	122.98	-0.690515	0.486936	-1.41808	0.156167	0.395294
6720468P15Rik	4.71731	-5.82815	3.24926	-1.79368	0.0728637	0.245454
6720483E21Rik	7.34813	-0.0787951	1.54931	-0.0508581	0.959439	0.986025
6720489N17Rik	97.9742	-0.0610183	0.685032	-0.0890737	0.929023	0.974368
6820408C15Rik	84.7802	-0.46783	0.575055	-0.813539	0.415909	0.685994
6820431F20Rik	10056.8	-0.326668	0.192065	-1.70082	0.0889771	0.279703
7420700N18Rik	4.52904	-0.833762	1.32327	-0.630078	0.528644	0.770128
7420701I03Rik	2.0657	-2.16856	1.79449	-1.20845	0.226873	NA
7530416G11Rik	1.39535	2.36769	3.06982	0.771279	0.440541	NA
7530420F21Rik	4.54718	-2.47454	1.71872	-1.43976	0.149935	0.386231
8030423F21Rik	52.6395	-0.13884	0.628271	-0.220987	0.825102	0.931573
8030442B05Rik	38.1917	-0.0368236	0.663169	-0.0555267	0.955719	0.984824
8030462N17Rik	218.278	0.316296	0.405988	0.779078	0.435934	0.703201
8430403D17Rik	47.9862	0.0775035	0.549734	0.140984	0.887883	0.957435
8430406I07Rik	272.742	-1.1182	0.421327	-2.65399	0.00795467	0.0536048
8430408G22Rik	3451.41	-0.185477	0.575999	-0.32201	0.747445	0.897216
8430410A17Rik	852.128	-0.400089	0.17945	-2.22953	0.0257787	0.123851
8430410K20Rik	732.443	0.0271578	0.209352	0.129723	0.896785	0.960658
8430419L09Rik	209.724	-1.38243	0.585071	-2.36284	0.0181356	0.0965836
8430427H17Rik	447.672	-1.31356	0.211213	-6.21911	4.99983e-10	4.82317e-08
8430429K09Rik	131.65	0.447191	0.42849	1.04365	0.29665	0.573138
9030025P20Rik	248.174	0.228937	0.312736	0.732045	0.464141	0.722941
9030204H09Rik	7.77814	-0.062682	1.09112	-0.0574473	0.954189	0.984102
9030224M15Rik	12.341	0.211869	1.19271	0.177637	0.859008	0.945366
9030404E10Rik	28.3779	-0.660857	0.942844	-0.700918	0.483354	0.737283
9030418K01Rik	8.44315	4.55161	1.74114	2.61416	0.0089447	0.0585414
9030425E11Rik	57.2391	1.99905	1.10297	1.81243	0.0699204	0.239493
9030617O03Rik	39.1644	0.890062	0.701592	1.26863	0.204572	0.461357
9030619P08Rik	7.78601	-2.33664	1.26879	-1.84163	0.0655289	0.228992
9030624G23Rik	227.215	0.20406	0.284413	0.717478	0.473079	0.730359
9030624J02Rik	1295.62	0.043983	0.204153	0.215441	0.829423	0.933131
9030625A04Rik	234.661	0.271027	0.292952	0.925157	0.354884	0.632411
9130008F23Rik	485.661	1.28587	0.33013	3.89506	9.81762e-05	0.00177778
9130011E15Rik	282.155	-0.0794368	0.231085	-0.343755	0.73103	0.890609
9130011J15Rik	2073.53	-0.0421624	0.173878	-0.242482	0.808406	0.923123
9130014G24Rik	66.557	0.177611	1.08029	0.164411	0.869408	0.949785
9130015A21Rik	1.65621	0.122165	2.2425	0.0544772	0.956555	NA
9130017N09Rik	448.976	-0.934977	0.317611	-2.94378	0.00324231	0.0275683
9130019O22Rik	176.738	0.223131	0.433547	0.514665	0.606787	0.823238
9130019P16Rik	4.55621	-2.74544	2.27407	-1.20728	0.227324	0.491084
9130023H24Rik	150.045	-0.468008	0.522245	-0.896146	0.370175	0.646274
9130024F11Rik	1.45119	3.01303	3.00861	1.00147	0.316599	NA
9130204L05Rik	8.42097	6.99461	3.04304	2.29856	0.0215301	0.109069
9130206I24Rik	3.45837	0.00382455	2.64464	0.00144615	0.998846	0.999737
9130209A04Rik	7.00485	0.0008882	1.04253	0.000851969	0.99932	0.999823
9130221F21Rik	76.0336	-0.273515	0.402918	-0.678835	0.497242	0.747154
9130221H12Rik	49.4221	0.112501	0.489087	0.230022	0.818075	0.927972
9130227L01Rik	14.8442	-0.156934	0.78774	-0.199221	0.84209	0.939019
9130230L23Rik	75.7	1.48818	0.631911	2.35505	0.01852	0.0978047
9130401M01Rik	493.164	0.196475	0.203366	0.966114	0.333987	0.61188
9130404H23Rik	8.4313	-4.7591	1.91328	-2.4874	0.012868	0.0754679
9130409I23Rik	8.29894	-0.586244	1.0179	-0.575933	0.56466	0.794271
9230102K24Rik	1.96369	4.89808	3.64384	1.34421	0.178881	NA
9230104L09Rik	51.0306	-2.66647	1.22912	-2.16941	0.0300517	0.136394
9230105E05Rik	8.53424	0.669195	1.19946	0.557912	0.576905	0.80295
9230110C19Rik	200.048	0.10015	0.397694	0.251828	0.801174	0.919823
9230112J17Rik	118.641	1.12708	0.389227	2.89569	0.00378323	0.03104
9230114K14Rik	60.8542	-0.30857	0.482235	-0.639875	0.522254	0.765514
9230116N13Rik	35.0448	0.259311	0.579889	0.447174	0.654749	0.849662
9330020H09Rik	87.4493	-0.586547	0.376248	-1.55894	0.119011	0.335927
9330133O14Rik	342.496	-0.448928	0.212981	-2.10783	0.0350454	0.151252
9330151L19Rik	169.257	-0.0546322	0.513306	-0.106432	0.91524	0.968692
9330158H04Rik	65.2503	0.0844385	0.505345	0.167091	0.867298	0.948578
9330159F19Rik	61.9926	-0.898247	0.388988	-2.30919	0.0209329	0.106826
9330159M07Rik	100.394	0.643654	0.549679	1.17096	0.241613	0.509507
9330175E14Rik	6.64008	0.816808	1.17743	0.69372	0.487858	0.741008
9330175M20Rik	1.98052	2.92604	3.63193	0.805643	0.420449	NA
9330179D12Rik	9.35531	3.14157	1.53116	2.05176	0.0401935	0.166344
9330182L06Rik	39.9743	0.594335	0.6438	0.923166	0.355921	0.633265
9330182O14Rik	1.56951	-1.5897	2.29289	-0.693316	0.488111	NA
9430008C03Rik	578.413	-0.337301	0.255175	-1.32184	0.18622	0.437307
9430015G10Rik	284.181	-0.567949	0.524741	-1.08234	0.279101	0.553645
9430016H08Rik	477.477	-0.0778979	0.198462	-0.392507	0.694684	0.872782
9430018G01Rik	15.5559	-1.55524	1.16146	-1.33904	0.180557	0.428767
9430020K01Rik	350.263	0.510163	0.460964	1.10673	0.26841	0.541824
9430021M05Rik	7.55302	0.559283	1.49881	0.37315	0.709037	0.879739
9430023L20Rik	1410.97	0.277271	0.186821	1.48415	0.137769	0.366885
9430037G07Rik	110.626	0.78398	0.563354	1.39163	0.164034	0.406308
9430038I01Rik	234.378	-0.18279	0.257206	-0.710676	0.477285	0.733296
9430041J12Rik	2.38755	0.0922311	1.58387	0.0582313	0.953564	NA
9430060I03Rik	11.3724	-0.0838502	1.30582	-0.0642128	0.948801	0.982234
9430076C15Rik	4.09748	2.39632	2.21711	1.08083	0.279773	0.554426
9430083A17Rik	91.9241	0.0552806	0.426541	0.129602	0.896881	0.960658
9430091E24Rik	29.626	0.518302	0.703024	0.737246	0.460973	0.721565
9530003J23Rik	30.5671	-0.171742	0.809191	-0.212239	0.831921	0.934345
9530008L14Rik	107.305	-3.50707	0.782147	-4.4839	7.32896e-06	0.000215375
9530026F06Rik	6.51605	0.284956	1.66032	0.171628	0.86373	0.94693
9530026P05Rik	58.0203	-1.4138	0.467452	-3.02447	0.00249066	0.0224993
9530027J09Rik	9.43688	0.665916	1.09457	0.608382	0.542934	0.780446
9530036O11Rik	71.017	-0.896658	0.445425	-2.01304	0.0441106	0.176321
9530048J24Rik	4.57397	3.99345	1.95935	2.03815	0.0415346	0.169428
9530052E02Rik	11.5012	0.608007	1.11791	0.543876	0.586527	0.810324
9530053A07Rik	146.159	-0.502771	0.438862	-1.14563	0.25195	0.521902
9530059O14Rik	10.3481	1.36238	2.16077	0.630506	NA	NA
9530068E07Rik	5262.26	0.375152	0.119472	3.14008	0.00168903	0.016919
9530077C05Rik	175.237	0.492199	0.295332	1.6666	0.0955948	0.292728
9530080O11Rik	11.3162	0.123333	0.882371	0.139775	0.888838	0.957668
9530082P21Rik	317.984	-0.214632	0.221303	-0.969853	0.33212	0.610216
9530091C08Rik	81.9017	-0.387863	0.517081	-0.750101	0.453194	0.715553
9630028B13Rik	10.0968	-0.510299	1.16744	-0.437111	0.662031	0.854391
9630033F20Rik	139.697	0.0120859	0.455436	0.026537	0.978829	0.993432
9830001H06Rik	394.128	-1.36374	0.323806	-4.21159	2.53579e-05	0.000601522
9830107B12Rik	18.6939	0.2889	0.812732	0.355468	0.722239	0.885335
9830132P13	16.1698	-0.382157	0.852442	-0.448309	0.65393	0.849128
9830147E19Rik	289.245	-0.510778	0.438169	-1.16571	0.243732	0.511939
9830166K06Rik	15.8875	0.61921	0.805757	0.768483	0.442201	0.707961
9930005F22Rik	13.4129	0.32943	0.909138	0.362354	0.717087	0.883067
9930012K11Rik	574.218	-0.0231791	0.258443	-0.0896877	0.928535	0.974368
9930013L23Rik	1.19591	-0.369458	2.73543	-0.135064	0.892561	NA
9930014A18Rik	280.761	-0.545508	0.370691	-1.4716	0.14113	0.372716
9930021D14Rik	2.49129	-4.11248	3.70876	-1.10886	0.267492	NA
9930021J03Rik	603.41	-0.454765	0.18516	-2.45607	0.0140464	0.0804383
9930023K05Rik	64.1687	3.51202	0.79025	4.4442	8.82208e-06	0.000252912
9930104L06Rik	282.403	0.0955816	0.312601	0.305763	0.759785	0.902294
9930111J21Rik1	1056.33	1.69208	0.385883	4.38495	1.16012e-05	0.000313508
9930111J21Rik2	67.7619	0.969397	0.795356	1.21882	0.222912	0.484977
A030009H04Rik	96.8786	-0.0262293	0.537081	-0.0488367	0.961049	0.986464
A130010J15Rik	296.512	0.228208	0.333354	0.684581	0.493608	0.744789
A130022J15Rik	677.624	0.324721	0.227498	1.42736	0.153476	0.391773
A130040M12Rik	28408.8	0.150921	0.944446	0.159799	NA	NA
A130049A11Rik	31.3154	0.924427	0.668338	1.38317	0.166612	0.409696
A130077B15Rik	2973.59	0.0382506	0.308877	0.123838	0.901444	0.963231
A1cf	12.7771	-2.7125	2.28076	-1.1893	0.234324	0.499985
A230001M10Rik	3.10309	0.250522	1.52681	0.164082	0.869666	NA
A230020J21Rik	2.14057	-3.42534	2.62047	-1.30715	0.191163	NA
A230046K03Rik	1426.37	-0.101471	0.218474	-0.464452	0.642324	0.844389
A230050P20Rik	346.663	0.5903	0.287115	2.05597	0.0397856	0.165172
A230051G13Rik	160.865	-0.179146	0.272232	-0.658063	0.510498	0.756925
A230056J06Rik	13.2416	0.164747	1.27135	0.129585	0.896895	0.960658
A230056P14Rik	25.6076	-0.454154	0.678695	-0.669158	0.503395	0.752138
A230057D06Rik	11.0025	0.312045	1.23944	0.251762	0.801225	0.919823
A230065H16Rik	3.96556	1.25274	2.47191	0.506791	0.612302	0.826493
A230072C01Rik	387.64	0.0401049	0.297002	0.135032	0.892586	0.959176
A230072E10Rik	33.0614	0.378665	0.638885	0.592696	0.553384	0.786659
A230073K19Rik	28.2381	0.282024	0.856994	0.329085	0.742091	0.894716
A230077H06Rik	23.6565	0.00808881	0.610589	0.0132476	0.98943	0.996316
A230108P19Rik	2.28083	0.981306	2.11749	0.463429	0.643057	NA
A2ld1	744.862	0.525275	0.174456	3.01094	0.00260443	0.0233022
A2m	1.49394	4.40086	3.64925	1.20596	0.227832	NA
A330009N23Rik	82.2575	0.475522	0.370579	1.28319	0.199427	0.454853
A330021E22Rik	152.734	-0.766065	0.629924	-1.21612	0.223938	0.486478
A330023F24Rik	42.7872	-0.511016	0.820336	-0.622936	0.533327	0.773413
A330032B11Rik	99.805	0.195721	0.412357	0.474639	0.635044	0.840442
A330035P11Rik	32.4821	-0.543505	0.691754	-0.78569	0.432049	0.699494
A330040F15Rik	11.6012	-2.74187	1.20277	-2.27963	0.0226298	0.112633
A330041J22Rik	29.0827	0.307583	0.725917	0.423716	0.671773	0.859396
A330048O09Rik	2.37833	-0.15537	2.7075	-0.0573852	0.954238	NA
A330049M08Rik	256.708	0.00632335	0.508456	0.0124364	0.990077	0.996616
A330049N07Rik	13.1953	0.126599	0.856696	0.147776	0.88252	0.955193
A330050B17Rik	194.352	0.0917482	0.304655	0.301155	0.763296	0.903086
A330069E16Rik	247.239	-0.198737	0.280223	-0.709208	0.478195	0.733952
A330076C08Rik	1.74115	-0.841706	2.45758	-0.342494	0.731979	NA
A330076H08Rik	16.622	-1.06848	0.884668	-1.20778	0.227133	0.491004
A330102I10Rik	11.1971	-1.24394	1.166	-1.06685	0.286039	0.561876
A3galt2	6.78662	2.10359	1.79449	1.17225	0.241096	0.509074
A430005L14Rik	410.83	0.498964	0.230077	2.16868	0.0301068	0.136488
A430033K04Rik	254.711	0.406517	0.295789	1.37435	0.169333	0.414021
A430035B10Rik	33.5156	-0.893239	0.602567	-1.48239	0.138237	0.367638
A430071A18Rik	38.585	-0.247226	0.753249	-0.328213	0.742751	0.895014
A430078G23Rik	70.3105	-0.113746	0.349101	-0.325825	0.744557	0.895769
A430084P05Rik	25.0424	2.51569	1.38539	1.81587	0.069391	0.238346
A430088P11Rik	6.30625	0.0236598	1.13725	0.0208044	0.983402	0.995029
A430090L17Rik	6.71401	0.540281	1.32932	0.406434	0.684424	0.867286
A430093F15Rik	1.38575	-1.13793	3.59318	-0.316692	0.751478	NA
A430105I19Rik	590.635	-1.14736	0.31878	-3.59923	0.000319161	0.00451564
A430107O13Rik	11.0291	2.475	1.51733	1.63116	0.102857	0.306529
A430107P09Rik	340.682	0.155185	0.359114	0.432132	0.665645	0.856118
A430110N23Rik	0.860395	3.12852	3.67539	0.851206	0.394655	NA
A4galt	23.8284	1.86037	0.869829	2.13878	0.0324532	0.143608
A530006G24Rik	1.52514	-1.22309	3.01263	-0.405987	0.684752	NA
A530013C23Rik	3.304	0.412348	2.44542	0.168621	0.866095	NA
A530032D15Rik	6.7539	0.781649	1.46755	0.532622	0.594295	0.814693
A530046M15	2.15174	0.681384	3.55608	0.191611	0.848047	NA
A530050N04Rik	13.3972	0.908887	0.902363	1.00723	0.313825	0.590932
A530054K11Rik	309.998	-0.058682	0.218577	-0.268472	0.788336	0.912312
A530064D06Rik	46.191	-1.49782	0.888072	-1.68659	0.0916813	0.28491
A530065N20	18.8452	-0.397923	0.768741	-0.517629	0.604717	0.82169
A530072M11Rik	8.08315	-2.40075	1.12952	-2.12546	0.0335482	0.146901
A530099J19Rik	1.13877	-0.108367	3.07021	-0.0352961	0.971844	NA
A630001G21Rik	103.617	-0.768719	0.438765	-1.75201	0.0797727	0.260727
A630007B06Rik	1039.74	-0.413313	0.138916	-2.97526	0.00292738	0.025644
A630010A05Rik	13.9581	0.58555	1.22505	0.477982	0.632663	0.838787
A630019I02Rik	4.23282	-0.639724	2.61574	-0.244567	0.806792	0.922307
A630020A06	94.1934	0.517225	0.51072	1.01274	0.311186	0.587562
A630023A22Rik	3.1558	4.91207	2.65851	1.84768	0.0646488	NA
A630033H20Rik	12.6808	2.04634	1.5528	1.31784	0.187558	0.439282
A630055G03Rik	151.162	-0.113672	0.40095	-0.283507	0.776788	0.908154
A630066F11Rik	63.1497	0.211501	0.355808	0.594424	0.552229	0.785946
A630071L07Rik	11.6642	-2.25073	1.89007	-1.19082	0.233725	0.499236
A630072M18Rik	124.552	0.0269827	0.359447	0.0750671	0.940161	0.978651
A630075F10Rik	157.675	0.289827	0.418829	0.691994	0.488941	0.741662
A630077J23Rik	13.7318	1.53489	1.79813	0.853608	0.393322	0.667856
A630089N07Rik	1869.87	0.253312	0.296143	0.855371	0.392346	0.667055
A630095N17Rik	4.42505	1.01733	1.8075	0.562836	0.573546	0.800802
A730008H23Rik	171.145	0.137187	0.439364	0.312239	0.754859	0.90044
A730011L01Rik	479.46	-0.428494	0.227428	-1.88408	0.0595538	0.215031
A730017L22Rik	583.228	0.146044	0.286114	0.510439	0.609744	0.824787
A730020E08Rik	33.9139	-0.61307	0.769328	-0.79689	0.425515	0.694231
A730020M07Rik	13.9507	1.77195	1.01357	1.74822	0.0804257	0.262054
A730037C10Rik	25.2494	0.429706	0.670351	0.641017	0.521512	0.764953
A730043L09	15.0161	-0.342478	0.787519	-0.434882	0.663648	0.855431
A730069N07Rik	6.55058	-6.49072	3.08064	-2.10694	0.0351225	0.15138
A730082K24Rik	31.6729	-0.331092	0.661515	-0.500506	0.616719	0.82926
A730085A09Rik	4.8806	-0.753704	1.55593	-0.484408	0.628096	0.836181
A730085K08Rik	1.2636	4.25753	3.65119	1.16607	0.243587	NA
A730090H04Rik	6.17009	-2.08116	1.50604	-1.38187	0.167011	0.410169
A730090N16Rik	3.34941	-1.9292	2.63298	-0.732709	0.463736	NA
A730098P11Rik	241.51	0.734148	0.231793	3.16726	0.00153885	0.0158175
A830007P12Rik	2068.14	-0.35758	0.187749	-1.90456	0.056837	0.208573
A830010M20Rik	41.3121	0.274102	0.634593	0.431933	0.66579	0.856118
A830018L16Rik	27.2337	0.445911	0.772695	0.577086	0.563882	0.793643
A830052D11Rik	93.8677	-0.0116303	0.461765	-0.0251866	0.979906	0.99383
A830060N17	21.2617	-1.98431	1.26939	-1.56319	0.118007	0.334313
A830080D01Rik	744.462	-0.470779	0.180344	-2.61046	0.00904209	0.0589607
A830082K12Rik	50.7528	0.695614	0.466186	1.49214	0.135663	0.363848
A830082N09Rik	42.9869	-0.357043	0.601509	-0.593578	0.552794	0.786314
A830093I24Rik	11.7506	-1.17909	1.43116	-0.82387	0.410014	0.682156
A930001A20Rik	3.69731	4.51402	2.82049	1.60044	0.109501	0.31811
A930001C03Rik	35.1703	-0.39812	0.536016	-0.742739	0.45764	0.719356
A930001N09Rik	1719.07	0.444331	0.211236	2.10348	0.0354241	0.152267
A930003A15Rik	8.27039	0.225407	1.39307	0.161806	0.871459	0.950916
A930004D18Rik	123.485	-1.24594	0.445191	-2.79867	0.00513131	0.0389671
A930005H10Rik	270.205	0.700901	0.338686	2.06947	0.0385016	0.161351
A930005I04Rik	6.73456	-1.0732	1.52396	-0.704216	0.481298	0.735769
A930007I19Rik	17.5758	-0.621133	0.657392	-0.944844	0.344738	0.622151
A930011O12Rik	1.25711	2.48252	3.01391	0.823688	0.410117	NA
A930012L18Rik	9.29318	-1.78376	1.25894	-1.41687	0.156521	0.395578
A930013F10Rik	34.7529	0.109803	0.539745	0.203435	0.838795	0.937446
A930015D03Rik	63.3532	0.0428586	0.80619	0.0531619	0.957603	0.985087
A930017M01Rik	2.02437	4.94461	3.64342	1.35713	0.174739	NA
A930018P22Rik	2.55552	2.83014	2.75663	1.02667	0.304576	NA
A930019D19Rik	11.2409	0.37466	1.05774	0.354206	0.723184	0.885865
A930024E05Rik	19.2188	0.626397	0.809013	0.774272	0.43877	0.705017
A930038C07Rik	4737.78	0.419759	0.32689	1.2841	0.199107	0.454557
A930041C12Rik	1.34635	-0.414624	3.64116	-0.113872	0.90934	NA
AA388235	89.9127	0.265179	0.534687	0.495952	0.619928	0.830729
AA415398	41.8307	-0.589407	0.502032	-1.17404	0.240378	0.508047
AA465934	349.741	-0.253485	0.250409	-1.01228	0.311402	0.587691
AA467197	426.754	0.871025	0.634614	1.37253	0.169899	0.414253
AA474331	18.4889	0.882837	0.719148	1.22762	0.219591	0.480775
AA536875	7.47575	-0.123736	1.06585	-0.116091	0.90758	0.965605
AA543186	32.0954	-0.347643	0.631125	-0.55083	0.58175	0.806776
AA792892	3.23818	0.623002	1.76307	0.353362	0.723817	NA
AA960436	652.286	-0.119221	0.196538	-0.606607	0.544112	0.78094
AA986860	4686.74	1.03573	0.228527	4.53218	5.83789e-06	0.000178848
AA987161	404.669	-0.29455	0.353322	-0.833658	0.404474	0.678186
AB124611	17.9279	1.44613	1.04114	1.38899	0.164836	0.407153
AF251705	67.1391	3.36456	1.30339	2.58138	0.00984055	0.063002
AF357355	3.64046	-3.50562	1.79353	-1.9546	0.0506306	0.193444
AF357425	4.36868	-1.38377	1.33126	-1.03945	0.298597	0.574429
AF357426	1.25209	-1.6755	3.70749	-0.451923	0.651325	NA
AF366264	7.06497	0.0522514	1.58145	0.0330402	0.973643	0.991267
AI118078	21.6033	1.76162	1.51034	1.16638	0.243463	0.511525
AI182371	33.9618	-0.476348	0.683048	-0.697386	0.485561	0.739447
AI197445	6.45685	-0.0510526	1.22984	-0.0415117	0.966888	0.988183
AI314180	1354.92	0.204075	0.176909	1.15356	0.248681	0.517757
AI314976	743.894	-0.0880306	0.221424	-0.397566	0.69095	0.87054
AI316807	508.657	0.514916	0.206951	2.48811	0.0128425	0.0754016
AI317395	41.6666	2.84715	0.759865	3.74691	0.000179027	0.00286101
AI413582	821.973	-0.279577	0.207228	-1.34913	0.177296	0.42418
AI414108	28.4864	0.381942	0.800272	0.477265	0.633173	0.839082
AI427809	14.9595	-0.495928	0.863201	-0.574522	0.565614	0.794957
AI428936	155.559	-1.10311	0.319604	-3.45149	0.000557501	0.00703149
AI429214	208.949	-0.15502	0.323145	-0.479722	0.631425	0.837952
AI450353	31.6261	-0.503828	0.665582	-0.756973	0.449066	0.712648
AI462493	660.588	-0.734499	0.235338	-3.12104	0.00180211	0.0177611
AI463170	52.7596	0.656647	0.629324	1.04342	0.296755	0.573165
AI464131	345.834	-1.26496	0.27654	-4.57423	4.77971e-06	0.000152462
AI467606	661.127	-0.822229	0.221974	-3.70417	0.000212084	0.00329662
AI480653	393.437	0.0282353	0.193736	0.145741	0.884126	0.95551
AI504432	15.4477	2.89622	1.74718	1.65765	0.0973872	0.296162
AI506816	72.382	0.223159	0.476798	0.468036	0.639759	0.843252
AI507597	27.4053	-0.374845	0.613623	-0.610872	0.541284	0.779271
AI597468	694.33	-0.451438	0.249407	-1.81005	0.0702885	0.240177
AI597479	555.256	0.303829	0.266256	1.14112	0.253822	0.52375
AI607873	58.4834	2.80243	1.20009	2.33519	0.0195336	0.102013
AI646023	6.90778	0.225451	1.19803	0.188185	0.850731	0.942867
AI661453	281.61	0.187434	0.341211	0.549321	0.582785	0.807608
AI662270	19.5444	1.50978	0.870745	1.73389	0.0829376	0.267668
AI747448	4.29056	6.02159	3.6367	1.65578	0.0977658	0.297143
AI836003	10.5908	-0.843249	1.0719	-0.786686	0.431466	0.698712
AI837181	446.974	-0.245139	0.253882	-0.965562	0.334263	0.61188
AI846148	383.017	-0.00309119	0.288629	-0.0107099	0.991455	0.996992
AI847159	8.84807	-1.63189	1.5652	-1.04261	0.297129	0.573444
AI848100	1160.11	0.192508	0.127749	1.50692	0.131831	0.357288
AI848285	2.6804	3.35859	2.40737	1.39513	0.162978	NA
AI987944	502.563	0.610543	0.24443	2.49782	0.0124959	0.0739944
AK010878	406.295	-0.730501	0.267509	-2.73075	0.00631897	0.0454697
AK129341	89.7196	-0.107714	0.582951	-0.184773	0.853407	0.943362
AU015836	1.48976	-3.44712	3.70291	-0.930924	0.351893	NA
AU018091	32.1101	-3.13424	1.35162	-2.31888	0.0204016	0.104921
AU019823	415	0.314085	0.21222	1.48	0.138873	0.369085
AU019990	11.3058	0.185468	1.02941	0.180169	0.85702	0.944511
AU021034	145.103	-0.70167	0.574668	-1.221	0.222086	0.48404
AU021092	2952.33	-1.63202	0.340858	-4.78798	1.68472e-06	6.10722e-05
AU022252	205.175	-0.215491	0.227591	-0.946833	0.343724	0.621358
AU022751	1.09758	4.05221	3.65432	1.10888	0.267481	NA
AU022754	47.4024	0.0688127	0.638715	0.107736	0.914205	0.968286
AU022793	11.1794	2.30135	1.47987	1.5551	0.119922	0.337376
AU023762	37.6352	-0.54222	0.787688	-0.688368	0.491221	0.74337
AU023871	128.521	2.50534	0.365761	6.84967	7.40225e-12	1.1329e-09
AU040320	1632.42	0.0222304	0.13332	0.166744	0.867571	0.948648
AU040972	2104.96	-0.453857	0.382886	-1.18536	0.235876	0.501863
AU041133	235.617	0.00735252	0.329483	0.0223153	0.982196	0.994695
AV039307	4.68577	-0.231897	1.16773	-0.198587	0.842586	0.939297
AV051173	49.874	-0.613035	0.515307	-1.18965	0.234184	0.499827
AW011738	21.9199	-0.552705	0.754269	-0.732769	0.463699	0.722514
AW046200	11.8925	0.890671	0.752963	1.18289	0.236854	0.50327
AW112010	1476.7	0.119656	0.233648	0.512121	0.608566	0.823967
AW146020	147.317	-0.00751996	0.449623	-0.016725	0.986656	0.995506
AW146154	291.238	-0.130713	0.22035	-0.593207	0.553043	0.786314
AW209491	594.107	-0.273673	0.244838	-1.11777	0.263665	0.535853
AW549542	9.78332	0.325346	1.05961	0.307043	0.75881	0.901989
AW549877	1307.29	-0.401633	0.168009	-2.39054	0.0168238	0.0911925
AW551984	1.73336	3.87252	3.64693	1.06186	0.2883	NA
AW554918	140.211	-0.239223	0.420376	-0.569069	0.569309	0.798125
AW555464	3824.41	-0.409071	0.13826	-2.9587	0.00308943	0.0265808
AY074887	51.7002	0.450369	0.420164	1.07189	0.28377	0.558678
AY512931	44.4793	0.321454	0.613232	0.524195	0.600143	0.818253
Aaas	547.554	0.202525	0.250298	0.809135	0.418437	0.688424
Aacs	739.967	-0.581823	0.18678	-3.11503	0.00183928	0.0179609
Aadac	18.1681	-2.64262	2.29058	-1.15369	NA	NA
Aagab	567.038	0.725258	0.207338	3.49794	0.000468858	0.00607226
Aak1	833.43	-0.257539	0.172254	-1.49511	0.134885	0.362418
Aamp	6293.04	-0.0250922	0.131998	-0.190095	0.849235	0.942336
Aanat	4.11052	0.470555	1.2698	0.370574	0.710955	0.880247
Aard	12.2399	-6.00165	2.13484	-2.81129	0.00493435	0.037942
Aars	2740.11	0.288743	0.184744	1.56294	0.118067	0.334313
Aars2	304.866	0.010204	0.358481	0.0284646	0.977292	0.992591
Aarsd1	509.563	-0.448989	0.274354	-1.63653	0.101729	0.304593
Aasdh	246.88	-0.131528	0.411232	-0.319838	0.749091	0.897787
Aasdhppt	735.827	0.0432008	0.205327	0.2104	0.833356	0.934516
Aass	419.779	-0.351985	0.626701	-0.561649	0.574356	0.801299
Aatf	697.242	0.214296	0.207703	1.03174	0.302194	0.578058
Aatk	31.2716	3.70181	1.42398	2.59961	0.00933284	0.0605095
Abat	25.7755	-1.38568	1.5648	-0.885531	0.375871	0.651811
Abca1	742.815	1.32348	0.251187	5.26888	1.37256e-07	7.07024e-06
Abca12	2.51438	-1.59213	3.26811	-0.487171	0.626137	NA
Abca13	1.9717	4.45946	3.64851	1.22227	0.221606	NA
Abca14	12.1992	-6.93195	2.09965	-3.30148	0.000961747	0.0108723
Abca17	26.8949	-0.0324239	0.992324	-0.0326747	0.973934	0.991373
Abca2	736.543	0.718978	0.162145	4.43416	9.24324e-06	0.000261788
Abca3	11011.3	-0.560912	0.260808	-2.15067	0.0315022	0.140465
Abca4	140.581	1.43162	0.401996	3.56128	0.000369045	0.0050508
Abca5	1360.7	0.418441	0.257021	1.62805	0.103515	0.308
Abca6	10.5124	1.34214	1.00493	1.33555	0.181695	0.430555
Abca7	1192.73	0.163441	0.254635	0.641862	0.520963	0.764678
Abca8b	36.2987	-0.643689	0.650915	-0.988899	0.322713	0.600041
Abca9	6.48038	-0.409023	2.35704	-0.173532	0.862233	0.946755
Abcb10	292.229	0.719693	0.204806	3.51402	0.000441382	0.00579183
Abcb1a	375.072	-2.10064	0.604267	-3.47635	0.000508296	0.00649843
Abcb1b	340.002	-1.78743	1.02162	-1.7496	0.0801867	0.261523
Abcb4	2.22904	1.80784	2.16178	0.836274	0.403001	NA
Abcb6	408.87	-0.242912	0.282282	-0.860532	0.389496	0.664552
Abcb7	473.76	0.535497	0.192403	2.78321	0.0053824	0.0403686
Abcb8	1025.86	0.404294	0.212801	1.89987	0.0574505	0.210119
Abcb9	82.6597	-0.0215751	0.397466	-0.0542817	0.956711	0.985057
Abcc1	845.537	1.6252	0.350666	4.63461	3.57612e-06	0.000118339
Abcc10	256.911	0.225452	0.378815	0.595152	0.551742	0.785764
Abcc2	3.21665	1.9026	2.90971	0.65388	0.513189	NA
Abcc3	2655.96	0.0848192	0.257675	0.329171	0.742027	0.894716
Abcc4	1183.8	0.439127	0.177118	2.47929	0.0131643	0.0767827
Abcc5	2679.03	0.466333	0.23046	2.02349	0.0430224	0.173331
Abcc8	179.218	0.528763	0.747619	0.707262	0.479404	0.734629
Abcc9	2.7112	1.8999	2.10425	0.902887	0.366586	NA
Abcd1	710.122	0.443785	0.214736	2.06665	0.0387667	0.16204
Abcd2	72.753	2.90173	0.768732	3.7747	0.000160202	0.00262609
Abcd3	4105.28	0.20904	0.135201	1.54614	0.12207	0.34104
Abcd4	387.309	0.50744	0.258997	1.95925	0.0500839	0.191851
Abce1	2535.42	0.0560629	0.109864	0.510295	0.609845	0.824787
Abcf1	1491.34	-0.108729	0.128702	-0.844813	0.398215	0.672309
Abcf2	2071.45	0.308417	0.133355	2.31275	0.0207365	0.106198
Abcf3	988.648	-0.134223	0.180012	-0.745635	0.455888	0.718185
Abcg1	373.851	2.28635	0.627261	3.64497	0.000267423	0.00398555
Abcg2	212.434	-0.596297	0.377489	-1.57964	0.114189	0.327208
Abcg3	3.13081	3.49073	3.36697	1.03676	0.299849	NA
Abcg4	3.80519	1.41728	3.52372	0.402211	0.687529	0.868585
Abcg5	20.5271	-0.713856	1.04583	-0.682575	0.494875	0.745569
Abcg8	1.43753	-0.436882	3.45527	-0.126439	0.899384	NA
Abhd1	282.91	0.0504297	0.301707	0.167148	0.867254	0.948578
Abhd10	250.814	0.252813	0.290314	0.870826	0.383849	0.658913
Abhd11	1720.17	0.452242	0.128376	3.5228	0.000427015	0.00565457
Abhd12	1314.14	0.063733	0.257341	0.24766	0.804397	0.921316
Abhd12b	96.4326	-2.66014	0.800605	-3.32266	0.000891645	0.0102398
Abhd13	1385.95	0.113926	0.178758	0.637322	0.523915	0.766608
Abhd14a	174.262	1.47036	0.405208	3.62865	0.000284907	0.00416807
Abhd14b	327.209	1.35446	0.736457	1.83916	0.0658912	0.2297
Abhd15	33.3932	1.39975	1.11803	1.25197	0.210579	0.469899
Abhd16a	2433.55	0.385712	0.149444	2.58099	0.00985175	0.0630266
Abhd16b	11.7716	1.4186	0.967459	1.46632	0.142562	0.374881
Abhd2	2987.81	0.0538857	0.190932	0.282224	0.777772	0.9085
Abhd3	167.55	0.232748	0.687135	0.338723	0.734819	0.892682
Abhd4	3750.88	-0.433639	0.178016	-2.43596	0.0148523	0.0834563
Abhd5	977.898	0.227018	0.262173	0.865911	0.386539	0.661492
Abhd6	499.865	1.23924	0.178047	6.96019	3.39825e-12	5.81612e-10
Abhd8	359.015	-0.0751293	0.260724	-0.288156	0.773227	0.906634
Abi1	2257.72	0.0979757	0.168456	0.581611	0.560829	0.791515
Abi2	533.107	-0.21157	0.170075	-1.24398	0.213508	0.473844
Abi3	19.0201	1.84046	0.999641	1.84112	0.0656043	0.229097
Abi3bp	8.27979	-0.286841	1.19463	-0.240109	0.810246	0.924008
Abl1	967.573	-0.212021	0.24251	-0.874279	0.381967	0.657627
Abl2	515.777	0.374226	0.206391	1.81319	0.0698018	0.239311
Ablim1	619.69	2.77729	0.549456	5.05463	4.31233e-07	1.95353e-05
Ablim2	20.8666	-1.44203	0.980999	-1.46997	0.141571	0.373472
Ablim3	643.467	2.26711	0.37574	6.03373	1.60222e-09	1.33521e-07
Abo	1.98679	2.02853	3.57608	0.567249	0.570545	NA
Abp1	113.728	-0.502401	0.71718	-0.700522	0.483601	0.737448
Abr	1518.83	0.103288	0.175751	0.587694	0.556737	0.78889
Abra	1.20987	-0.195433	3.81685	-0.0512028	0.959164	NA
Abt1	1041.93	-0.0157114	0.188308	-0.0834346	0.933506	0.976383
Abtb1	874.124	-0.261823	0.212931	-1.22962	0.21884	0.480187
Abtb2	214.496	-0.59045	0.413675	-1.42733	0.153485	0.391773
Acaa1a	3147.4	0.264868	0.174918	1.51424	0.129964	0.353878
Acaa1b	15.7486	2.08569	2.17028	0.961025	0.33654	0.613527
Acaa2	4421.1	0.0364929	0.147481	0.247441	0.804567	0.921316
Acaca	821.02	0.292237	0.345559	0.845695	0.397723	0.671882
Acacb	194.965	0.321745	0.373207	0.862109	0.388628	0.663737
Acad10	354.871	-0.135682	0.293398	-0.462448	0.64376	0.8453
Acad11	483.663	0.105746	0.265537	0.398233	0.690458	0.870359
Acad12	154.776	-0.295914	0.389102	-0.760506	0.446952	0.711699
Acad8	593.159	0.0883098	0.169729	0.5203	0.602854	0.82035
Acad9	1653.85	0.199888	0.134466	1.48653	0.13714	0.366066
Acadl	4448.54	-0.168953	0.21401	-0.789464	0.429841	0.697399
Acadm	1968.43	-0.408941	0.183095	-2.23349	0.0255168	0.122972
Acads	662.662	0.194031	0.198695	0.976528	0.328803	0.606906
Acadsb	1296.33	0.622653	0.205884	3.02429	0.00249215	0.0225001
Acadvl	2109.18	0.27494	0.143145	1.9207	0.0547691	0.203873
Acan	31.627	1.36986	1.41952	0.965015	0.334537	0.612049
Acap1	17.2198	-1.44745	1.25008	-1.15788	0.246912	0.515488
Acap2	923.083	0.0425332	0.157455	0.27013	0.78706	0.911698
Acap3	346.649	-0.392039	0.255538	-1.53418	0.124987	0.34639
Acat1	1863.19	0.225215	0.197721	1.13905	0.254682	0.524692
Acat2	743.146	-0.033352	0.213708	-0.156063	0.875983	0.952478
Acat3	44.1775	0.995042	0.777036	1.28056	0.200348	0.45628
Acbd3	1815.4	0.0484459	0.188371	0.257183	0.797038	0.917247
Acbd4	765.346	0.399352	0.221592	1.80219	0.0715149	0.242553
Acbd5	1355.38	0.0198064	0.194307	0.101934	0.918809	0.970529
Acbd6	339.391	0.184148	0.201542	0.913699	0.360875	0.638243
Acbd7	6.71316	-3.20086	2.31072	-1.38522	0.165984	0.408721
Accn1	3.56018	3.94018	2.31408	1.7027	0.0886238	0.279332
Accn2	38.8036	1.41014	0.532919	2.64608	0.00814312	0.0544597
Accn3	3.14002	1.92158	2.19778	0.874328	0.38194	NA
Accn5	4.44846	-5.6102	3.29739	-1.70141	0.0888669	0.279567
Accs	80.0526	0.488011	0.566451	0.861524	0.38895	0.663885
Acd	605.615	-0.147483	0.227034	-0.649607	0.515946	0.761182
Ace	444.102	1.08428	0.45286	2.39429	0.0166527	0.0906501
Ace2	430.154	-0.78399	0.395331	-1.98312	0.0473535	0.184963
Acer1	3.97344	0.226102	1.4812	0.152648	0.878676	0.953473
Acer2	129.417	1.3706	0.524569	2.61281	0.00898013	0.0587491
Acer3	1956.95	0.404573	0.190988	2.11832	0.0341481	0.148751
Ache	46.4851	1.44557	0.864304	1.67252	0.0944212	0.290348
Acin1	1053.06	0.0553098	0.179418	0.308273	0.757875	0.9015
Acly	8862.06	-0.189891	0.188985	-1.00479	0.314996	0.59217
Acmsd	34.8973	0.670597	0.61526	1.08994	0.275739	0.55031
Acn9	119.6	-0.0485469	0.345799	-0.14039	0.888352	0.957615
Acnat1	557.041	0.170329	0.254645	0.668887	0.503567	0.752256
Acnat2	1.15303	-1.88392	3.65484	-0.515459	0.606232	NA
Aco1	4460.91	-0.0122217	0.197712	-0.0618159	0.950709	0.982626
Aco2	4482.51	0.305518	0.110418	2.76693	0.00565873	0.0418541
Acot1	441.503	0.543127	0.351215	1.54642	0.122002	0.34104
Acot10	1.06242	1.74271	3.65564	0.476716	0.633564	NA
Acot11	284.345	-0.481411	0.426534	-1.12866	0.259043	0.53003
Acot12	2.97339	-5.51415	3.68975	-1.49445	0.135057	NA
Acot13	989.065	0.421723	0.179011	2.35585	0.0184805	0.0977027
Acot2	403.578	-0.319937	0.32213	-0.993191	0.320617	0.597711
Acot3	4.94042	-3.93172	2.21592	-1.7743	0.0760131	0.252617
Acot4	11.0769	6.04057	2.05962	2.93286	0.00335853	0.0282994
Acot6	10.8523	1.01368	1.24582	0.81367	0.415834	0.685994
Acot7	1652.91	-0.83317	0.212164	-3.927	8.6011e-05	0.00160121
Acot8	346.125	-0.45336	0.197317	-2.29762	0.0215835	0.10927
Acot9	1935.71	0.628841	0.176229	3.56833	0.000359268	0.00495534
Acox1	3144.04	0.292019	0.15819	1.846	0.0648918	0.22739
Acox2	355.777	-1.45738	0.308949	-4.71722	2.39084e-06	8.30895e-05
Acox3	765.477	0.253935	0.188892	1.34434	0.178838	0.426133
Acoxl	210.053	-2.17705	0.656501	-3.31615	0.000912673	0.0104662
Acp1	2339.4	-0.295496	0.138601	-2.13198	0.0330081	0.14543
Acp2	1359.52	0.363321	0.164088	2.21419	0.026816	0.127146
Acp5	749.68	2.48876	0.300698	8.27661	1.26729e-16	5.93277e-14
Acp6	781.611	-0.619178	0.239615	-2.58406	0.00976452	0.0626701
Acpl2	318.328	0.431896	0.410934	1.05101	0.293254	0.568818
Acpp	50.4131	0.357323	0.831706	0.429627	0.667467	0.857403
Acpt	2.1486	-1.96993	2.44886	-0.804429	0.421149	NA
Acr	1.07803	4.03129	3.65467	1.10305	0.270004	NA
Acrbp	88.4003	-0.325635	0.489008	-0.665908	0.50547	0.753422
Acrv1	2.18904	-3.01867	3.71839	-0.811821	0.416894	NA
Acsbg1	342.274	-0.886664	0.437562	-2.02637	0.0427264	0.17254
Acsf2	250.819	-0.405908	0.234153	-1.73351	0.0830044	0.267825
Acsf3	301.963	-0.289789	0.273757	-1.05856	0.289799	0.565424
Acsl1	840.125	1.84076	0.388631	4.73652	2.17421e-06	7.67338e-05
Acsl3	2287.16	-0.505015	0.215397	-2.34458	0.0190486	0.0999717
Acsl4	6476.14	-0.157741	0.118136	-1.33525	0.181796	0.430714
Acsl5	7962.18	0.0660134	0.180495	0.365735	0.714563	0.882269
Acsl6	17.8128	0.22465	1.46277	0.153578	0.877942	0.953132
Acsm1	8.56007	2.36001	1.47082	1.60455	0.108593	0.316559
Acsm2	46.0144	-0.333496	0.517116	-0.644915	0.518982	0.763319
Acsm3	16.4725	7.21066	1.68127	4.28881	1.79631e-05	0.000451688
Acss1	1216.56	-0.462183	0.228777	-2.02023	0.0433591	0.174192
Acss2	881.213	-0.0453064	0.743088	-0.0609703	0.951383	0.982808
Acss3	105.037	-2.72864	0.623857	-4.37383	1.22087e-05	0.000328252
Acta1	13.1012	-0.776689	0.905621	-0.857632	0.391096	0.665855
Acta2	1432.46	-5.15455	0.402586	-12.8036	1.56517e-37	1.24564e-33
Actb	179063	0.278083	0.133896	2.07686	0.037814	0.159567
Actbl2	1.41272	-2.18437	2.69922	-0.809259	0.418366	NA
Actg1	75784	0.190617	0.129952	1.46682	0.142426	0.374709
Actg2	1.08887	-2.20592	3.69659	-0.596745	0.550678	NA
Actl6a	1569.97	-0.271072	0.131188	-2.0663	0.0388005	0.162139
Actn1	1509.32	0.419698	0.162691	2.57972	0.00988804	0.0631319
Actn2	7.38521	1.05234	1.38186	0.761541	0.446334	0.711267
Actn3	2.12948	-5.02926	3.69438	-1.36133	0.173411	NA
Actn4	15345.8	0.43946	0.127719	3.44084	0.000579921	0.00724868
Actr10	2513.2	0.267689	0.135803	1.97115	0.0487066	0.188445
Actr1a	1988.98	0.270833	0.103275	2.62244	0.00873022	0.0574923
Actr1b	2538.97	0.0576322	0.12062	0.4778	0.632792	0.838787
Actr2	2963	0.52055	0.188549	2.76082	0.00576562	0.0425064
Actr3	9554.33	-0.312778	0.155012	-2.01777	0.0436154	0.174824
Actr3b	2.33553	-0.544618	3.54163	-0.153776	0.877786	NA
Actr5	304.286	0.116027	0.239036	0.485396	0.627396	0.836082
Actr6	266.634	-0.866249	0.326966	-2.64935	0.00806456	0.0541618
Actr8	1118.9	-0.0157762	0.195427	-0.0807272	0.935659	0.976799
Acvr1	294.685	0.0345049	0.274628	0.125642	0.900015	0.962563
Acvr1b	126.767	1.00974	0.36115	2.7959	0.00517552	0.0391907
Acvr1c	62.7646	-3.60119	1.11359	-3.23386	0.00122127	0.0132148
Acvr2a	701.48	-0.431688	0.181662	-2.37632	0.0174861	0.0938074
Acvr2b	122.429	-0.123148	0.399239	-0.308457	0.757734	0.9015
Acvrl1	69.6237	3.46764	0.892526	3.88519	0.000102249	0.00183276
Acy1	289.831	0.503151	0.373108	1.34854	0.177485	0.424369
Acy3	247.71	-1.14984	0.375746	-3.06014	0.00221231	0.0207259
Acyp1	185.732	-0.369911	0.294394	-1.25652	0.208928	0.467986
Acyp2	123.089	-0.406087	0.362115	-1.12143	0.262105	0.533767
Ada	18.5332	1.38421	1.0781	1.28394	0.199163	0.454557
Adal	294.72	0.154101	0.239657	0.643006	0.52022	0.76401
Adam10	4173.82	0.978141	0.246439	3.9691	7.21439e-05	0.00139698
Adam11	30.7894	-1.06776	1.10052	-0.970228	0.331933	0.610216
Adam12	238.673	2.40239	0.401448	5.98431	2.17304e-09	1.70068e-07
Adam15	853.006	-0.871499	0.244501	-3.56439	0.000364697	0.0050042
Adam17	2201.1	0.806641	0.298183	2.70518	0.00682664	0.0482717
Adam19	820.375	-0.979477	0.463382	-2.11376	0.0345361	0.149941
Adam1a	34.9622	0.298225	1.03076	0.289326	0.772332	0.906542
Adam1b	16.7628	-1.05802	1.06018	-0.997967	0.318296	0.595428
Adam21	2.7794	-1.21687	3.03749	-0.400618	0.688701	NA
Adam22	398.882	-0.525517	0.410988	-1.27867	0.201015	0.457306
Adam23	2.04547	4.73831	3.64538	1.29981	0.193665	NA
Adam28	1474.52	2.76731	0.760012	3.64114	0.000271433	0.00403775
Adam3	1.45501	4.47039	3.64838	1.22531	0.220459	NA
Adam30	5.78635	-5.18299	2.62908	-1.97141	0.0486774	0.188424
Adam32	3.70048	0.16782	1.71808	0.0976792	0.922187	0.971915
Adam33	7.39691	3.17457	2.57857	1.23114	0.218272	0.47927
Adam4	10.7873	-0.651076	1.17477	-0.554215	0.579431	0.804828
Adam5	6.70135	1.19973	3.03695	0.395043	0.692811	0.871668
Adam7	5.97138	-0.996863	1.70731	-0.58388	0.559301	0.790577
Adam8	524.144	0.469717	0.382213	1.22894	0.219094	0.480376
Adam9	5446.34	0.205663	0.178604	1.1515	0.249527	0.518976
Adamdec1	22.7901	3.16927	1.17357	2.70054	0.00692277	0.0486704
Adamts1	1238.38	0.148078	0.439385	0.337013	0.736107	0.893239
Adamts10	683.872	-0.671916	0.243693	-2.75722	0.00582946	0.0427525
Adamts13	1.15931	0.994276	3.62007	0.274657	0.78358	NA
Adamts14	1.31152	4.3188	3.65034	1.18312	0.236761	NA
Adamts15	57.7763	3.74818	1.00554	3.72753	0.000193368	0.00305039
Adamts17	16.4037	-0.394002	1.06739	-0.369126	0.712034	0.881107
Adamts18	42.7325	-1.87407	0.98662	-1.89949	0.0575003	0.210157
Adamts2	7.11656	2.71634	1.83705	1.47864	0.139236	0.369617
Adamts20	3.15388	1.33161	3.53084	0.377138	0.706071	NA
Adamts3	10.974	0.167317	1.42496	0.117419	0.906528	0.965279
Adamts4	20.0288	1.15426	1.27226	0.90725	0.364275	0.641106
Adamts5	24.4118	1.22093	1.04064	1.17325	0.240696	0.508349
Adamts6	142.38	-1.1177	0.65955	-1.69463	0.0901451	0.281869
Adamts7	19.187	0.715488	1.0707	0.668242	0.503979	0.752447
Adamts8	6.80256	1.44076	2.08042	0.692533	0.488603	0.741523
Adamts9	312.023	-0.74878	0.550229	-1.36085	0.173561	0.419041
Adamtsl1	20.9978	1.19454	1.56475	0.763408	0.44522	0.710219
Adamtsl2	5.63092	-0.072394	2.87242	-0.0252032	0.979893	0.99383
Adamtsl3	55.4702	-0.11794	1.01041	-0.116725	0.907078	0.965458
Adamtsl4	1356.87	2.45133	0.237249	10.3323	5.03283e-25	6.67563e-22
Adamtsl5	358.132	0.135289	0.238567	0.567088	0.570654	0.798673
Adap1	297.234	1.15724	0.374333	3.09148	0.00199164	0.0191546
Adap2	28.1138	0.762787	0.901253	0.846363	0.39735	0.671602
Adar	1059.01	0.356073	0.22484	1.58367	0.113268	0.325726
Adarb1	35.4288	2.6912	0.854598	3.14908	0.00163783	0.0166152
Adarb2	5.85347	2.14929	2.22679	0.965193	0.334448	0.611957
Adat1	142.405	-0.820405	0.394918	-2.0774	0.0377643	0.1594
Adat2	108.732	1.11964	0.460733	2.43012	0.0150938	0.084357
Adat3	150.103	0.119434	0.272988	0.437505	0.661745	0.854188
Adc	400.962	-0.357253	0.563464	-0.63403	0.526061	0.768406
Adck1	349.806	0.359509	0.310671	1.1572	0.247191	0.515488
Adck2	446.867	-0.129708	0.215895	-0.600792	0.547978	0.783452
Adck3	365.655	0.118111	0.3368	0.350685	0.725825	0.88746
Adck4	1431.81	0.257804	0.198238	1.30048	0.193437	0.447586
Adck5	624.982	-0.208732	0.199919	-1.04408	0.296447	0.573138
Adcy1	15.7608	-1.81627	2.14176	-0.848026	0.396423	0.670741
Adcy10	1.7806	-3.18064	2.91969	-1.08937	0.275989	NA
Adcy2	13.7825	1.41812	1.08378	1.3085	0.190704	0.444091
Adcy3	1508.73	0.886552	0.213332	4.15574	3.24234e-05	0.000737262
Adcy4	13.4331	1.62294	1.59151	1.01975	0.307847	0.584587
Adcy5	8.61206	1.04539	1.45589	0.718044	0.47273	0.730032
Adcy6	635.776	-0.579368	0.288868	-2.00565	0.0448937	0.178153
Adcy7	1074.92	-0.0369537	0.466627	-0.0791932	0.936879	0.977152
Adcy8	14.9312	-0.431973	1.60362	-0.269373	0.787643	0.911988
Adcy9	110.133	-0.148956	0.473267	-0.31474	0.752959	0.899561
Adcyap1	415.298	0.0404463	0.395221	0.102338	0.918488	0.970376
Adcyap1r1	22.8969	5.06833	1.46154	3.46781	0.000524722	0.00667626
Add1	4051.5	-0.0183215	0.158513	-0.115584	0.907982	0.965744
Add2	43.3146	-3.53736	1.21472	-2.91208	0.00359026	0.0298396
Add3	521.006	2.29502	0.427321	5.37072	7.84225e-08	4.21706e-06
Adh1	136.658	-1.59981	1.92463	-0.831229	NA	NA
Adh5	2246.96	-0.231355	0.136454	-1.69548	0.0899839	0.281766
Adh7	76.64	1.55592	0.647095	2.40446	0.0161963	0.089018
Adhfe1	16.5249	0.222111	1.26053	0.176205	0.860133	0.945747
Adi1	4085.69	-0.299324	0.138933	-2.15445	0.0312053	0.139678
Adig	21.3267	-0.185994	0.621312	-0.299356	0.764668	0.903632
Adipor1	6568.51	-0.106584	0.110988	-0.960314	0.336897	0.614066
Adipor2	1607.13	-0.131675	0.180724	-0.728596	0.466249	0.724871
Adk	3831.39	-0.116347	0.187252	-0.621338	0.534377	0.7743
Adm	121.006	1.46036	0.765702	1.90722	0.0564921	0.207712
Adm2	55.8462	-1.02151	0.565374	-1.80679	0.0707954	0.241347
Adnp	1338.09	-0.0164865	0.279567	-0.0589714	0.952975	0.983563
Adnp2	413.284	0.537749	0.380111	1.41472	0.157152	0.396605
Ado	832.734	0.0544286	0.206719	0.263298	0.792321	0.914703
Adora1	683.252	-2.44772	0.245708	-9.96191	2.23716e-23	2.54349e-20
Adora2a	3.08448	1.38018	3.03497	0.45476	0.649282	NA
Adora2b	241.395	-0.648972	0.352976	-1.83857	0.0659785	0.229899
Adora3	72.7601	-1.49983	0.458646	-3.27012	0.00107502	0.0119574
Adpgk	352.867	0.0189612	0.254045	0.0746373	0.940503	0.978706
Adprh	586.654	0.606091	0.167005	3.62917	0.00028433	0.00416346
Adprhl1	9.24028	-0.761342	2.54939	-0.298637	0.765217	0.903661
Adprhl2	675.849	0.0126047	0.17735	0.0710724	0.94334	0.980037
Adra1b	9.53965	2.90182	1.33101	2.18017	0.0292449	0.134108
Adra2a	18.5692	1.96825	1.09932	1.79042	0.0733863	0.246432
Adra2b	16.8157	-0.585696	0.728952	-0.803478	0.421699	0.690805
Adra2c	7.73001	6.87112	2.20062	3.12236	0.00179408	0.0177256
Adrb1	160.409	-0.326536	0.374865	-0.871076	0.383713	0.658852
Adrb2	1072.46	0.486809	0.348556	1.39665	0.16252	0.404091
Adrb3	2.09065	3.73302	3.29491	1.13297	0.257228	NA
Adrbk1	674.268	0.123234	0.264162	0.46651	0.640851	0.843919
Adrbk2	1647.73	-0.351322	0.236114	-1.48793	0.136769	0.365627
Adrm1	2806.24	0.0533445	0.126689	0.421065	0.673708	0.860557
Adsl	1694.55	0.272106	0.167481	1.6247	0.104227	0.309271
Adss	3889.44	0.256614	0.147737	1.73697	0.0823929	0.266717
Adssl1	3793.16	-0.283241	0.283417	-0.999381	0.31761	0.594608
Aebp1	495.484	-1.51977	0.370087	-4.10651	4.01685e-05	0.000883282
Aebp2	1314.32	-0.278896	0.142215	-1.96108	0.0498696	0.191363
Aen	742.606	0.607242	0.183383	3.31133	0.000928523	0.0105812
Aes	5492.84	-0.2609	0.0908823	-2.87075	0.00409501	0.0329693
Afap1	449.439	-0.717316	0.309143	-2.32033	0.0203229	0.104618
Afap1l1	1724.5	0.198493	0.236971	0.837628	0.40224	0.676006
Afap1l2	27.79	0.864472	0.890943	0.970289	0.331902	0.610216
Aff1	1695.15	-0.0420843	0.169698	-0.247995	0.804138	0.921223
Aff2	16.6507	0.0127884	1.10862	0.0115355	0.990796	0.996896
Aff3	2.73296	1.67615	1.87986	0.891634	0.372589	NA
Aff4	4917.04	0.167901	0.165956	1.01172	0.311672	0.588062
Afg3l1	1684.58	0.163043	0.141712	1.15053	0.249926	0.519398
Afg3l2	1542.26	-0.0523277	0.159499	-0.328075	0.742855	0.895014
Afmid	146.462	1.42389	0.373392	3.8134	0.00013707	0.00232955
Afp	788.813	-2.7514	0.424963	-6.47445	9.5159e-11	1.2021e-08
Aftph	1197.44	0.0115625	0.147875	0.078191	0.937676	0.97747
Aga	618.05	0.153464	0.211255	0.726438	0.46757	0.725997
Agap1	781.028	-0.0775383	0.251793	-0.307945	0.758124	0.901671
Agap3	1979.98	-0.227186	0.121845	-1.86456	0.0622438	0.221216
Agbl2	131.788	-0.775953	0.418891	-1.8524	0.0639686	0.225163
Agbl3	82.4859	-0.403909	0.505361	-0.799248	0.424147	0.692763
Agbl4	1.59338	1.85114	3.482	0.531631	0.594981	NA
Agbl5	317.742	-0.275056	0.287227	-0.957623	0.338253	0.615785
Ager	31862	-0.876245	0.27648	-3.16929	0.00152813	0.0157432
Agfg1	1620.46	-0.057862	0.228833	-0.252857	0.800379	0.919431
Agfg2	383.312	0.113602	0.256029	0.443709	0.657253	0.851151
Aggf1	1064.81	-0.112046	0.158022	-0.709053	0.478292	0.733993
Agk	387.156	-0.881923	0.302366	-2.91674	0.00353714	0.0294841
Agl	645.293	0.0492034	0.267295	0.184079	0.853952	0.94346
Agmo	34.1402	0.395684	0.891033	0.444073	0.656989	0.851151
Agpat1	481.122	-0.0824845	0.200743	-0.410896	0.681149	0.865162
Agpat2	1074.27	0.284254	0.159235	1.78512	0.0742416	0.248362
Agpat3	1786.37	0.08613	0.162394	0.530375	0.595852	0.815777
Agpat4	519.087	1.52682	0.405592	3.76443	0.000166932	0.00270301
Agpat5	717.932	-0.388947	0.256909	-1.51395	0.130038	0.353997
Agpat6	2706.82	-0.0795526	0.176374	-0.451046	0.651956	0.848249
Agpat9	203.414	0.217791	0.317422	0.686124	0.492635	0.744129
Agphd1	40.6502	-0.352685	0.797811	-0.442066	0.658442	0.851789
Agps	2198.9	0.0759045	0.154785	0.490385	0.623862	0.833544
Agr2	945.792	-0.24361	0.938967	-0.259445	0.795292	0.916365
Agr3	47.2926	-0.955669	0.620512	-1.54013	0.123529	0.343502
Agrn	3985.2	-0.445325	0.243001	-1.83261	0.066861	0.231959
Agrp	6.75867	-1.17886	1.41489	-0.833185	0.40474	0.678385
Agt	88.934	-3.66253	1.12969	-3.24207	0.00118663	0.0129013
Agtpbp1	731.211	-0.0536216	0.290652	-0.184487	0.853631	0.943362
Agtrap	568.924	0.305339	0.245541	1.24354	0.21367	0.474071
Agxt	1.59789	-0.326152	3.391	-0.0961818	0.923376	NA
Agxt2l1	5.78726	6.45353	3.63513	1.77532	NA	NA
Agxt2l2	341.81	-0.119233	0.227318	-0.524519	0.599918	0.818173
Ahctf1	1162.19	0.279413	0.203499	1.37305	0.169738	0.414183
Ahcy	1089.48	-0.565828	0.22889	-2.47205	0.0134339	0.0778121
Ahcyl1	4069.07	0.400977	0.237877	1.68565	0.091864	0.28514
Ahcyl2	5959	0.7259	0.207067	3.50562	0.00045554	0.00592872
Ahdc1	122.95	-0.305124	0.421715	-0.723532	0.469353	0.72712
Ahi1	161.908	-0.199745	0.358046	-0.557875	0.57693	0.80295
Ahnak	12623.9	0.784378	0.156986	4.99649	5.83843e-07	2.51163e-05
Ahr	2053.17	-0.0775009	0.169907	-0.456136	0.648292	0.847169
Ahrr	7.23669	-3.97634	2.06336	-1.92712	0.0539645	0.202107
Ahsa1	1772.2	-0.215598	0.144334	-1.49375	0.135241	0.363131
Ahsa2	680.953	-0.1868	0.200251	-0.932827	0.350909	0.628141
Ahsg	41.6232	-5.80501	1.53714	-3.77649	NA	NA
Aicda	1.1244	4.09066	3.6537	1.11959	0.262888	NA
Aif1	2.19884	4.94389	3.59944	1.37351	0.169592	NA
Aif1l	723.785	-1.60179	0.308863	-5.18608	2.14766e-07	1.05507e-05
Aifm1	1098.83	-0.0381026	0.253595	-0.15025	0.880568	0.954313
Aifm2	515.557	0.585765	0.276914	2.11533	0.0344019	0.149488
Aifm3	87.9765	-1.54332	0.349195	-4.41965	9.8861e-06	0.000277037
Aig1	1010.95	0.38616	0.2855	1.35258	0.176191	0.422673
Aim1	1159.49	0.497542	0.270519	1.83921	0.0658839	0.2297
Aim1l	59.6835	-1.53613	0.506602	-3.03223	0.00242757	0.0220924
Aim2	162.004	-1.79158	0.602304	-2.97454	0.00293426	0.0256901
Aimp1	539.635	-0.267611	0.195008	-1.37231	0.169967	0.414299
Aimp2	973.935	-0.296389	0.135771	-2.18301	0.0290354	0.133533
Aip	1288.92	-0.332886	0.151511	-2.19711	0.0280127	0.13045
Aipl1	2.7031	2.08771	2.81821	0.740791	0.45882	NA
Aire	1.72693	-4.72641	3.69817	-1.27804	0.201235	NA
Airn	142.052	-0.523489	0.378223	-1.38408	0.166335	0.409269
Ak1	1623.25	-1.32927	0.726784	-1.82898	0.0674025	0.233481
Ak2	1253.28	0.147364	0.198444	0.742596	0.457727	0.719356
Ak3	5151.98	0.639372	0.22671	2.82021	0.00479916	0.0371538
Ak4	85.6094	-0.673747	1.12218	-0.600391	0.548246	0.783552
Ak5	13.9773	4.06938	1.57651	2.58126	0.00984394	0.063002
Ak7	294.263	-0.688847	0.432584	-1.5924	0.111295	0.321619
Ak8	88.1808	-0.476382	0.539953	-0.882266	0.377633	0.653488
Akap1	666.86	0.0790197	0.23685	0.333627	0.738661	0.893389
Akap10	534.113	0.057518	0.188926	0.304448	0.760787	0.902311
Akap11	1422.13	-0.0199737	0.139302	-0.143384	0.885987	0.956734
Akap12	164.089	3.1198	0.712345	4.37962	1.18884e-05	0.000320182
Akap13	5002.36	-0.38681	0.159413	-2.42646	0.0152469	0.0848676
Akap14	16.3536	-0.880644	1.20915	-0.728315	0.466421	0.724894
Akap17b	72.4769	-0.0212767	0.44701	-0.0475978	0.962037	0.986567
Akap2	120.378	1.57099	0.608976	2.57973	0.00988777	0.0631319
Akap5	1624.26	0.152599	0.334379	0.456364	0.648128	0.847169
Akap6	12.1098	0.798399	1.95454	0.408484	0.682919	0.86662
Akap7	552.707	-0.229107	0.413955	-0.55346	0.579949	0.80536
Akap8	1768	0.0235347	0.175909	0.133789	0.893569	0.959464
Akap8l	1548.47	-0.435388	0.150562	-2.89176	0.00383096	0.0313508
Akap9	1681.77	-0.339143	0.16005	-2.11898	0.0340924	0.148671
Akirin1	1455.87	0.515244	0.221899	2.32198	0.0202342	0.104263
Akirin2	782.847	-0.0692399	0.147501	-0.46942	0.63877	0.84264
Akna	664.151	-0.983668	0.209685	-4.69116	2.71657e-06	9.27889e-05
Aknad1	2.47532	-1.47284	1.98844	-0.7407	0.458875	NA
Akr1a1	13464.4	0.151894	0.109554	1.38648	0.165601	0.408283
Akr1b10	351.312	-0.692463	0.212428	-3.25975	0.00111511	0.0122849
Akr1b3	130.847	0.927348	0.833936	1.11201	0.266133	0.538936
Akr1b7	14.0417	2.15902	1.34533	1.60483	0.108532	0.316559
Akr1b8	4275.03	0.138801	0.293054	0.473636	0.635759	0.840759
Akr1c12	363.837	-3.08009	0.599303	-5.13945	2.75542e-07	1.30919e-05
Akr1c13	1246.37	-2.4887	0.440273	-5.65263	1.58008e-08	1.01774e-06
Akr1c14	193.06	0.857782	0.416288	2.06055	0.0393459	0.163902
Akr1c18	113.582	-3.18354	0.692572	-4.59669	4.29251e-06	0.00013887
Akr1c19	1227.96	-1.43418	0.298274	-4.80825	1.52257e-06	5.6756e-05
Akr1c20	5.03542	0.0350734	1.18913	0.029495	0.97647	0.992558
Akr1d1	33.7972	-0.379754	0.575353	-0.660036	0.50923	0.755609
Akr1e1	464.717	-0.470484	0.29905	-1.57326	0.115658	0.329963
Akr7a5	1304.22	-0.44739	0.190333	-2.35056	0.0187451	0.0986659
Akt1	2766.08	0.350095	0.374892	0.933854	0.350379	0.627403
Akt1s1	1025.78	-0.247964	0.167752	-1.47816	0.139364	0.369832
Akt2	2436.16	0.350929	0.128951	2.72141	0.00650033	0.046418
Akt3	211.607	-0.101051	0.452303	-0.223414	0.823213	0.930617
Aktip	1899.27	-0.0592905	0.143607	-0.412867	0.679704	0.864309
Alad	1834.42	-0.365481	0.194239	-1.88161	0.0598896	0.215915
Alas1	3527.52	0.645606	0.175162	3.68577	0.000228016	0.00348639
Alas2	2.87891	0.616357	3.20277	0.192445	0.847394	NA
Alb	2272.03	-5.54623	1.16961	-4.74194	2.11683e-06	7.51778e-05
Alcam	6836.06	-0.242478	0.197233	-1.2294	0.218923	0.480303
Aldh16a1	746.837	0.135146	0.216442	0.624397	0.532367	0.772935
Aldh18a1	1179.11	-0.17226	0.22684	-0.759389	0.44762	0.712096
Aldh1a1	2385.31	0.776175	0.190578	4.07274	4.64641e-05	0.000989617
Aldh1a2	63.5044	3.05086	2.11791	1.4405	0.149726	0.385885
Aldh1a3	2709.92	-1.13711	0.316479	-3.59301	0.000326878	0.00458811
Aldh1a7	1652.37	0.261834	0.347635	0.753185	0.451339	0.713899
Aldh1b1	12.6238	5.10966	1.8308	2.79095	0.00525543	0.0395843
Aldh1l1	120.714	0.150947	0.691351	0.218336	0.827168	0.932245
Aldh1l2	204.116	-2.1659	0.837581	-2.5859	0.00971255	0.0623889
Aldh2	6490.52	0.189487	0.180207	1.05149	0.293032	0.568549
Aldh3a1	400.885	2.11936	0.565378	3.74856	0.00017785	0.00284506
Aldh3a2	2437.37	-0.357576	0.191391	-1.8683	0.0617201	0.219875
Aldh3b1	1453.36	-0.928158	0.284919	-3.25762	0.0011235	0.0123585
Aldh3b2	53.4448	0.400069	0.877532	0.455903	0.64846	0.847169
Aldh4a1	510.471	-0.332188	0.274909	-1.20835	0.226911	0.490793
Aldh5a1	147.275	-0.521106	0.361778	-1.4404	0.149753	0.385887
Aldh6a1	1143.42	-0.158406	0.236008	-0.671187	0.502101	0.751264
Aldh7a1	1127.4	-0.222385	0.194692	-1.14224	0.253353	0.523177
Aldh8a1	0.882873	2.40719	3.67539	0.654948	0.512501	NA
Aldh9a1	1111.36	-0.194558	0.208637	-0.932517	0.35107	0.628313
Aldoa	26758.9	-0.161023	0.169309	-0.951061	0.341574	0.619299
Aldoart1	15.7409	-0.249927	0.767032	-0.325836	0.744549	0.895769
Aldob	3.04611	5.26537	3.64088	1.44618	0.148126	NA
Aldoc	622.296	0.932558	0.358566	2.6008	0.00930071	0.0603503
Alg1	689.275	0.14668	0.214285	0.68451	0.493653	0.744789
Alg10b	227.457	-0.109329	0.285084	-0.383499	0.70135	0.876004
Alg11	756.006	0.0789937	0.193942	0.407305	0.683784	0.867056
Alg12	191.858	0.0529171	0.266231	0.198764	0.842448	0.939297
Alg13	102.076	-0.0985776	0.446034	-0.221009	0.825085	0.931573
Alg14	462.168	0.156011	0.304086	0.513049	0.607917	0.823648
Alg2	1010.64	0.128067	0.214607	0.59675	0.550674	0.785126
Alg3	511.488	-0.0297966	0.200128	-0.148887	0.881642	0.954681
Alg5	1287.26	0.389075	0.207785	1.87249	0.0611382	0.218683
Alg6	247.744	0.755772	0.301109	2.50997	0.0120743	0.0723321
Alg8	517.91	0.0351702	0.294874	0.119272	0.90506	0.964679
Alg9	646.177	0.497146	0.210679	2.35973	0.0182882	0.0970396
Alk	52.593	0.269699	0.871876	0.309332	0.757069	0.901266
Alkbh1	425.447	-0.212757	0.292385	-0.727661	0.466821	0.725128
Alkbh2	137.723	-0.200804	0.367095	-0.547009	0.584373	0.809104
Alkbh3	644.347	0.20356	0.206498	0.985773	0.324245	0.601726
Alkbh4	202.511	-0.00477131	0.332545	-0.0143479	0.988552	0.996062
Alkbh5	2605.51	4.55097e-05	0.147198	0.000309173	0.999753	0.999948
Alkbh6	827.669	-0.122176	0.234023	-0.522071	0.601621	0.819115
Alkbh7	308.026	-0.496981	0.251207	-1.97838	0.0478863	0.186267
Alkbh8	264.873	0.00259902	0.353101	0.00736055	0.994127	0.998204
Alms1	232.281	-1.44076	0.310809	-4.6355	3.56074e-06	0.000118076
Alms1-ps2	1.53123	-1.63175	3.60327	-0.452852	0.650655	NA
Alox12	50.3313	-1.04116	0.739895	-1.40718	0.159375	0.399805
Alox12b	1.9611	4.89899	3.64383	1.34446	0.178799	NA
Alox15	23.7795	0.934779	1.46814	0.636709	0.524314	0.766969
Alox5	71.5602	3.48482	1.27167	2.74034	0.00613758	0.0444458
Alox5ap	89.9699	3.46826	0.932366	3.71984	0.000199347	0.00313278
Alox8	30.9559	0.541564	0.657884	0.823191	0.410399	0.682386
Aloxe3	9.74419	0.103057	1.22226	0.0843168	0.932805	0.976189
Alpi	14.6706	-0.779244	1.89449	-0.41132	0.680838	0.865064
Alpk1	637.361	0.216435	0.221714	0.976193	0.328969	0.606955
Alpk2	34.9261	-7.58224	1.31236	-5.77757	7.57866e-09	5.4094e-07
Alpk3	3.77505	-0.134318	2.30487	-0.0582754	0.953529	0.983816
Alpl	157.873	3.52422	0.809479	4.35369	1.33866e-05	0.000353945
Alppl2	1.32849	4.3399	3.65005	1.18899	0.234442	NA
Als2	487.347	0.328555	0.172579	1.9038	0.0569369	0.208768
Als2cl	1205.18	0.727519	0.237659	3.06118	0.00220466	0.0206699
Als2cr12	1.4933	-0.455781	3.44197	-0.132419	0.894653	NA
Als2cr4	288.862	-0.547773	0.286844	-1.90965	0.0561777	0.206938
Alyref	1374.12	0.409626	0.119339	3.43246	0.000598125	0.00744942
Alyref2	89.9363	-0.379173	0.374499	-1.01248	0.311308	0.587584
Amacr	296.406	-0.103227	0.334219	-0.30886	0.757428	0.901381
Ambp	17.5389	1.39994	1.54523	0.905976	0.364949	0.641997
Ambra1	633.117	0.105086	0.182703	0.575174	0.565173	0.794618
Amd1	2206.48	-0.308712	0.204253	-1.51142	0.130681	0.354897
Amd2	147.17	11.1225	3.63081	3.06338	0.00218853	0.0205879
Amdhd1	1.25101	4.24709	3.65134	1.16316	0.244765	NA
Amdhd2	980.933	-1.76795	0.252294	-7.00751	2.42593e-12	4.33859e-10
Amfr	5428.83	0.0739395	0.104112	0.710191	0.477586	0.733545
Amhr2	61.3293	-2.11766	0.98116	-2.15832	0.0309031	0.138833
Amica1	20.4324	1.76517	0.776271	2.27391	0.0229714	0.113976
Amigo1	238.864	0.661283	0.351894	1.87921	0.0602157	0.216453
Amigo2	173.085	0.0970333	0.509898	0.1903	0.849074	0.942306
Amigo3	75.7157	0.121325	0.664078	0.182696	0.855036	0.944234
Ammecr1	191.459	1.25589	0.337824	3.71759	0.000201129	0.00315406
Ammecr1l	1397.13	0.193147	0.193239	0.999522	0.317542	0.594608
Amn1	582.246	0.0271402	0.22704	0.119539	0.904848	0.964679
Amot	260.267	-0.746017	0.363785	-2.05071	0.0402954	0.166683
Amotl1	685.548	-0.450153	0.209053	-2.15329	0.0312956	0.139964
Amotl2	970.49	0.653933	0.226629	2.88548	0.00390816	0.031819
Ampd1	2.73355	0.420686	2.6425	0.1592	0.873511	NA
Ampd2	1241.77	-0.358903	0.198499	-1.80809	0.0705924	0.240874
Ampd3	484.94	0.0673119	0.446634	0.150709	0.880205	0.95411
Amph	84.3309	-5.00749	1.05966	-4.72556	2.29478e-06	8.02771e-05
Amt	18.3365	-3.07117	0.898461	-3.41826	0.000630236	0.00780659
Amy1	10.7779	0.827498	1.25567	0.659009	0.50989	0.756094
Amy2a2	4.52162	0.321168	1.17374	0.273626	0.784372	0.910952
Amy2a3	4.52162	0.321168	1.17374	0.273626	0.784372	0.910952
Amy2a4	4.52162	0.321168	1.17374	0.273626	0.784372	0.910952
Amz1	66.9694	1.86093	1.35477	1.37361	0.169562	0.414152
Amz2	563.021	0.00389986	0.240041	0.0162466	0.987038	0.99567
Anapc1	1849.79	0.0685247	0.188882	0.36279	0.716762	0.883067
Anapc10	430.345	0.141984	0.180463	0.786773	0.431415	0.698712
Anapc11	1079.7	0.136124	0.163787	0.831103	0.405915	0.67922
Anapc13	525.652	0.139195	0.256502	0.542667	0.587359	0.810519
Anapc16	728.434	0.0948463	0.154304	0.614672	0.538771	0.777622
Anapc2	3290.89	0.00445468	0.123604	0.03604	0.97125	0.989848
Anapc4	2052.43	-0.0119482	0.106649	-0.112033	0.910797	0.966942
Anapc5	4372.87	-0.145931	0.10631	-1.37269	0.169849	0.414253
Anapc7	846.944	0.0559673	0.161484	0.34658	0.728907	0.889384
Ang	636.024	-0.781347	0.456308	-1.71233	0.0868366	0.275609
Ang2	2.56599	4.12426	3.03009	1.3611	0.173482	NA
Ang3	37.3264	-7.42751	3.11743	-2.38257	0.0171922	0.0926991
Ang4	13.4236	-1.90341	1.9618	-0.970234	0.33193	0.610216
Ang6	4.74485	-4.59649	2.7278	-1.68506	0.0919774	0.285437
Angel1	134.5	0.339783	0.369855	0.918694	0.358256	0.635502
Angel2	989.879	0.0781163	0.196433	0.397674	0.690871	0.870534
Angpt1	8.81392	1.3373	2.09475	0.638406	0.52321	0.766068
Angpt2	37.8136	-0.362531	1.00604	-0.360354	0.718582	0.883524
Angptl1	9.77573	0.0290658	1.37601	0.0211232	0.983147	0.995005
Angptl2	889.071	2.13927	0.316037	6.76906	1.29621e-11	1.89283e-09
Angptl3	5.22759	1.1599	1.452	0.798835	0.424386	0.692981
Angptl4	4652.87	1.54026	0.296424	5.19615	2.03456e-07	1.00572e-05
Angptl6	67.1766	-0.122283	0.666808	-0.183386	0.854495	0.943924
Angptl7	45.6778	1.17626	0.792857	1.48357	0.137923	0.36711
Ank	1043.57	-0.536446	0.438483	-1.22342	0.221173	0.482843
Ank1	80.0433	-0.471496	0.646582	-0.729213	0.465871	0.724785
[truncated: 15,382 more rows]

## Sheet: KPSHet_v_KP_DESeq2_enrichment
Gene	baseMean	log2FoldChange	lfcSE	stat	pvalue	padj
0610005C13Rik	3.56837	0.918161	1.78178	0.515305	0.60634	NA
0610007C21Rik	1554.29	0.00860389	0.270385	0.031821	0.974615	1
0610007L01Rik	2692.91	0.129058	0.137779	0.936703	0.348911	0.997447
0610007N19Rik	131.516	-0.765063	0.737458	-1.03743	0.299534	0.997447
0610007P08Rik	630.432	0.307238	0.203513	1.50967	0.131127	0.997447
0610007P14Rik	933.225	0.154829	0.217641	0.711394	0.47684	0.997447
0610007P22Rik	457.149	-0.0594669	0.246818	-0.240934	0.809606	0.997447
0610008F07Rik	4.09108	-1.22716	2.20353	-0.556904	0.577593	NA
0610009B14Rik	24.0695	-0.331878	1.31028	-0.253288	0.800046	0.997447
0610009B22Rik	584.273	-0.253373	0.234256	-1.08161	0.279427	0.997447
0610009D07Rik	1788.89	0.218858	0.202546	1.08054	0.279903	0.997447
0610009L18Rik	58.5323	0.00791996	0.451537	0.01754	0.986006	1
0610009O20Rik	153.994	-0.147036	0.357195	-0.41164	0.680604	0.997447
0610010B08Rik	468.838	0.00409734	0.228702	0.0179156	0.985706	1
0610010F05Rik	802.549	0.195744	0.241345	0.811054	0.417335	0.997447
0610010K14Rik	479.595	0.389526	0.201501	1.93312	0.0532214	0.956384
0610010O12Rik	3933.72	0.064209	0.170197	0.377262	0.705979	0.997447
0610011F06Rik	1334.65	0.00855785	0.185894	0.0460362	0.963281	1
0610011L14Rik	848.568	0.0460772	0.260406	0.176944	0.859553	0.999684
0610012G03Rik	902.576	-0.1123	0.163272	-0.687809	0.491573	0.997447
0610030E20Rik	802.491	0.2647	0.269215	0.983228	0.325495	0.997447
0610031J06Rik	3470.27	-0.264862	0.202124	-1.31039	0.190063	0.997447
0610037L13Rik	631.98	0.0383055	0.284871	0.134466	0.893034	1
0610037P05Rik	1005.93	-0.248997	0.250146	-0.995408	0.319538	0.997447
0610038B21Rik	7.84566	0.945968	1.25111	0.756106	0.449586	0.997447
0610038L08Rik	3.09556	1.02064	2.63505	0.387332	0.69851	NA
0610039K10Rik	3.72951	-1.85046	1.77106	-1.04483	0.296101	NA
0610040B10Rik	20.2216	0.306075	0.855016	0.357976	0.720362	0.997447
0610040F04Rik	6.68686	1.33815	1.90809	0.701303	0.483114	0.997447
0610040J01Rik	2225.32	0.184843	0.260095	0.710678	0.477284	0.997447
0610043K17Rik	1.198	-1.49258	3.10973	-0.479971	0.631248	NA
0910001L09Rik	871.5	0.30347	0.211129	1.43736	0.150615	0.997447
100043387	16.181	3.55616	2.37286	1.49868	NA	NA
1100001G20Rik	184.124	1.50984	0.857785	1.76016	0.0783807	0.997447
1110001A16Rik	449.951	0.154577	0.2339	0.660866	0.508698	0.997447
1110001J03Rik	431.474	0.0501685	0.202748	0.247443	0.804565	0.997447
1110002B05Rik	1623.6	0.319733	0.267413	1.19565	0.231832	0.997447
1110002L01Rik	145.509	-0.262406	0.501894	-0.522832	0.601091	0.997447
1110002N22Rik	218.416	-0.0397486	0.336356	-0.118174	0.90593	1
1110003E01Rik	4180.12	0.0119695	0.246914	0.0484766	0.961336	1
1110004E09Rik	764.629	0.35317	0.258229	1.36766	0.171418	0.997447
1110004F10Rik	2444.03	0.0166546	0.148556	0.11211	0.910736	1
1110005A03Rik	261.47	0.249362	0.348614	0.715297	0.474426	0.997447
1110006O24Rik	28.7567	-0.267018	0.717695	-0.372049	0.709857	0.997447
1110007C09Rik	1124.33	-0.013337	0.22003	-0.0606145	0.951666	1
1110008F13Rik	3622.51	-0.297826	0.190104	-1.56665	0.117196	0.997447
1110008J03Rik	171.291	-0.181076	0.33257	-0.544476	0.586114	0.997447
1110008L16Rik	354.639	0.0921706	0.250851	0.367432	0.713297	0.997447
1110008P14Rik	833.281	0.161909	0.274926	0.588918	0.555916	0.997447
1110012J17Rik	2126.59	-0.0917103	0.224587	-0.408351	0.683016	0.997447
1110012L19Rik	455.897	-0.504255	0.268645	-1.87703	0.0605133	0.982247
1110014N23Rik	1235.56	0.0476003	0.16025	0.297038	0.766437	0.997447
1110017D15Rik	213.118	0.500218	0.516184	0.969069	0.332511	0.997447
1110017F19Rik	146.825	-0.0690122	0.501731	-0.137548	0.890598	1
1110018G07Rik	696.303	-0.263981	0.177762	-1.48503	0.137537	0.997447
1110018J18Rik	660.128	-0.344513	0.269671	-1.27753	0.201415	0.997447
1110019D14Rik	70.5649	0.0665912	0.642214	0.10369	0.917415	1
1110020A21Rik	41.4472	-0.265368	0.601329	-0.441302	0.658994	0.997447
1110020G09Rik	666.671	0.0509495	0.358183	0.142245	0.886887	1
1110021J02Rik	381.402	0.230878	0.229784	1.00476	0.315012	0.997447
1110021L09Rik	501.438	-0.349449	0.289986	-1.20506	0.228182	0.997447
1110028C15Rik	433.831	-0.177095	0.339056	-0.522319	0.601448	0.997447
1110028F11Rik	6.49537	1.6487	1.4775	1.11587	0.26448	0.997447
1110028F18Rik	6.08668	1.21764	1.68364	0.723218	0.469546	0.997447
1110031I02Rik	543.454	-0.144333	0.263108	-0.548567	0.583302	0.997447
1110032A03Rik	608.312	-0.0821325	0.250631	-0.327704	0.743136	0.997447
1110032A04Rik	497.18	-0.180753	0.416427	-0.434057	0.664247	0.997447
1110032F04Rik	14.4393	-3.71191	2.20979	-1.67975	0.0930052	0.997447
1110034A24Rik	373.26	-0.102546	0.259964	-0.394461	0.693241	0.997447
1110034B05Rik	274.562	0.142131	0.336217	0.422737	0.672487	0.997447
1110034G24Rik	122.192	0.281866	0.54969	0.512773	0.60811	0.997447
1110036E04Rik	1.54979	-0.0646893	2.86189	-0.0226037	0.981966	NA
1110037F02Rik	725.946	0.164899	0.254069	0.649034	0.516317	0.997447
1110038B12Rik	374.42	-0.0484141	0.265826	-0.182127	0.855483	0.999684
1110038D17Rik	527.862	-0.30722	0.234074	-1.31249	0.189355	0.997447
1110038F14Rik	426.769	0.0930413	0.186694	0.498363	0.618228	0.997447
1110046J04Rik	132.909	-0.0330537	0.511469	-0.0646249	0.948473	1
1110049F12Rik	829.345	-0.0251025	0.246885	-0.101677	0.919013	1
1110050K14Rik	9.09972	-0.953166	1.68337	-0.566227	0.57124	0.997447
1110051M20Rik	556.41	0.141905	0.237028	0.598685	0.549383	0.997447
1110054M08Rik	84.1754	0.212652	0.457666	0.464646	0.642185	0.997447
1110054O05Rik	436.328	0.255336	0.230481	1.10784	0.267932	0.997447
1110057K04Rik	898.058	-0.320093	0.220974	-1.44856	0.147461	0.997447
1110058L19Rik	576.041	-0.366458	0.309918	-1.18243	0.237034	0.997447
1110059E24Rik	1109.77	0.387292	0.214941	1.80186	0.071568	0.997447
1110059G10Rik	310.456	0.296521	0.258397	1.14754	0.25116	0.997447
1110065P20Rik	362.386	0.104519	0.227062	0.460311	0.645293	0.997447
1110067D22Rik	469.363	0.30377	0.232094	1.30883	0.190593	0.997447
1190002F15Rik	41.7466	0.0939698	0.937964	0.100185	0.920198	1
1190002H23Rik	10127.9	0.0817757	0.387703	0.210923	0.832947	0.997839
1190002N15Rik	319.689	-0.277632	0.400396	-0.693393	0.488063	0.997447
1190003J15Rik	456.549	0.145078	0.40944	0.354334	0.723089	0.997447
1190005F20Rik	469.161	-0.408139	0.291865	-1.39838	0.161999	0.997447
1190005I06Rik	36.6643	0.0872342	0.668165	0.130558	0.896125	1
1190007F08Rik	611.832	0.0300565	0.312825	0.0960807	0.923456	1
1190007I07Rik	160.622	0.0670293	0.313739	0.213647	0.830823	0.997447
1200009I06Rik	46.4481	-0.271271	0.537428	-0.504759	0.613728	0.997447
1200011I18Rik	945.721	0.0491518	0.203765	0.241218	0.809386	0.997447
1200011M11Rik	618.621	0.0913868	0.285412	0.320193	0.748822	0.997447
1200014J11Rik	744.193	0.294003	0.255439	1.15097	0.249744	0.997447
1200016B10Rik	1278.97	0.0484875	0.179812	0.269656	0.787425	0.997447
1300001I01Rik	1962.25	-0.13395	0.227918	-0.587712	0.556726	0.997447
1300002E11Rik	529.274	-0.226447	0.24386	-0.928594	0.353099	0.997447
1300002K09Rik	31.7245	1.52412	0.865936	1.76008	0.0783943	0.997447
1300010F03Rik	768.753	-0.120009	0.316285	-0.379433	0.704366	0.997447
1300014I06Rik	1362.76	0.0874072	0.356224	0.245371	0.806169	0.997447
1300015D01Rik	1.89763	2.96905	2.66005	1.11616	0.264352	NA
1300017J02Rik	1.50642	0.726463	3.43292	0.211617	0.832406	NA
1300018I17Rik	509.361	-0.0294336	0.190147	-0.154794	0.876984	1
1300018J18Rik	1054.3	-0.385071	0.247696	-1.55461	0.120039	0.997447
1500001M20Rik	432.056	-0.0318986	0.270046	-0.118123	0.90597	1
1500002O10Rik	24.804	-0.668065	1.16138	-0.575232	0.565134	0.997447
1500002O20Rik	351.445	-0.0998868	0.242881	-0.411258	0.680883	0.997447
1500003O03Rik	3850.45	-0.180988	0.269625	-0.671258	0.502056	0.997447
1500004A13Rik	64.3765	-0.349318	0.62891	-0.555434	0.578598	0.997447
1500009C09Rik	1.49867	2.21444	4.1805	0.529708	0.596315	NA
1500009L16Rik	20.114	0.781939	0.954454	0.819253	0.412642	0.997447
1500010J02Rik	669.766	0.122015	0.226966	0.537591	0.590859	0.997447
1500011B03Rik	697.375	0.204509	0.338145	0.604797	0.545314	0.997447
1500011H22Rik	786.453	0.293278	0.302303	0.970144	0.331975	0.997447
1500011K16Rik	364.94	-0.18374	0.227243	-0.808562	0.418767	0.997447
1500012F01Rik	625.634	0.0128417	0.224181	0.0572828	0.95432	1
1500012K07Rik	44.7212	0.681111	0.634896	1.07279	0.283365	0.997447
1500015A07Rik	107.737	0.554623	0.524749	1.05693	0.290543	0.997447
1500015L24Rik	12.1663	-0.613234	1.93877	-0.3163	0.751775	0.997447
1500015O10Rik	43.1635	0.0858216	0.690792	0.124236	0.901128	1
1500016L03Rik	4.01557	-0.282159	1.44746	-0.194934	0.845444	NA
1500017E21Rik	4.36641	1.37648	2.82564	0.48714	0.626159	NA
1500031L02Rik	471.864	-0.124383	0.259871	-0.478635	0.632198	0.997447
1500032L24Rik	1946.16	0.138533	0.175985	0.78719	0.431171	0.997447
1520402A15Rik	121.646	0.0173769	0.425818	0.0408083	0.967449	1
1600002D24Rik	2.21302	-4.3264	3.69966	-1.16941	0.24224	NA
1600002H07Rik	166.141	-0.0950507	0.318025	-0.298878	0.765033	0.997447
1600002K03Rik	213.471	0.112602	0.386056	0.291672	0.770538	0.997447
1600010M07Rik	12.6385	1.95957	1.3231	1.48104	0.138597	0.997447
1600012F09Rik	1703.15	0.0544668	0.217899	0.249963	0.802616	0.997447
1600012H06Rik	1263.48	-0.0939746	0.175751	-0.534703	0.592855	0.997447
1600014C10Rik	262.608	-0.278448	0.217054	-1.28285	0.199545	0.997447
1600014C23Rik	6.19479	2.14684	1.61903	1.326	0.184838	0.997447
1600016N20Rik	155.128	0.00422735	0.472574	0.00894538	0.992863	1
1600020E01Rik	311.877	-0.0596393	0.226209	-0.263648	0.792051	0.997447
1600021P15Rik	37.95	0.0630568	1.11476	0.0565655	0.954891	1
1600027N09Rik	233.213	0.0569558	0.281776	0.202131	0.839814	0.998189
1600029D21Rik	2252.35	-0.28722	0.746042	-0.384992	0.700243	0.997447
1600029I14Rik	52.2598	0.201396	0.781927	0.257563	0.796744	0.997447
1600029O15Rik	24.5857	0.0983254	0.771831	0.127393	0.89863	1
1700001C02Rik	93.8346	0.333712	0.68653	0.486086	0.626906	0.997447
1700001C19Rik	4.37813	2.57462	1.89569	1.35814	0.174418	NA
1700001D01Rik	5.30148	0.662373	1.38416	0.478537	0.632268	NA
1700001G17Rik	8.78266	-0.202862	1.15573	-0.175526	0.860666	0.999684
1700001J11Rik	14.9523	0.413741	1.42808	0.289718	0.772032	0.997447
1700001K19Rik	3.30453	1.97825	2.46759	0.801693	0.42273	NA
1700001L05Rik	63.3678	0.410702	0.482159	0.851798	0.394326	0.997447
1700001L19Rik	84.5454	0.0342904	0.643343	0.0533004	0.957493	1
1700001O22Rik	14.2611	-1.21854	0.984018	-1.23833	0.215595	0.997447
1700001P01Rik	3.14299	0.846282	2.22973	0.379545	0.704284	NA
1700003D09Rik	2.35986	0.83749	3.09731	0.270393	0.786858	NA
1700003E16Rik	114.67	-0.0497925	0.512302	-0.0971938	0.922573	1
1700003F12Rik	6.23396	0.930781	1.64306	0.566492	0.571059	0.997447
1700003G18Rik	2.06391	1.41256	3.25245	0.434307	0.664065	NA
1700003M02Rik	140.404	0.527384	0.696003	0.757732	0.448611	0.997447
1700003M07Rik	31.7946	0.136108	0.802303	0.169647	0.865288	0.999684
1700007G11Rik	78.8977	-0.247139	0.694094	-0.35606	0.721796	0.997447
1700007J10Rik	31.3475	0.620678	0.758153	0.818671	0.412974	0.997447
1700007K13Rik	228.496	0.653037	0.528786	1.23498	0.21684	0.997447
1700007L15Rik	55.9148	0.541003	0.534367	1.01242	0.311338	0.997447
1700007P06Rik	10.9771	0.460718	0.930117	0.495334	0.620365	0.997447
1700008J07Rik	87.6346	-0.173497	0.432987	-0.400699	0.688642	0.997447
1700008O03Rik	4.7358	-3.47978	1.95933	-1.77601	0.075732	NA
1700008P20Rik	17.8431	1.85374	1.72552	1.0743	0.282686	0.997447
1700009P17Rik	189.634	0.389523	0.497577	0.782839	0.433721	0.997447
1700010B08Rik	2.80569	-1.0143	1.83275	-0.553432	0.579967	NA
1700010I02Rik	28.2772	1.32533	1.32488	1.00034	0.317145	0.997447
1700010I14Rik	1.45605	0	4.32799	0	1	NA
1700011A15Rik	4.85521	1.5617	2.37389	0.657866	0.510624	NA
1700011H14Rik	4.83833	1.63943	2.26751	0.723007	0.469675	NA
1700011I03Rik	1.25496	-1.65991	3.16732	-0.524072	0.600228	NA
1700011J10Rik	199.684	0.0868805	0.330835	0.26261	0.792851	0.997447
1700012A16Rik	3.86567	-0.469119	1.95122	-0.240424	0.810002	NA
1700012B09Rik	3.10762	3.00279	2.38464	1.25922	0.207951	NA
1700012B15Rik	117.298	0.835441	0.339728	2.45915	0.0139267	0.790732
1700012D01Rik	24.1677	0.202295	0.784544	0.257851	0.796522	0.997447
1700012D14Rik	10.1243	1.5303	0.993992	1.53955	0.12367	0.997447
1700013F07Rik	42.9219	1.39396	0.690539	2.01865	0.0435237	0.926284
1700013G23Rik	5.75674	-0.957468	1.48807	-0.64343	0.519945	NA
1700013H16Rik	4.48942	-0.73523	3.41584	-0.215241	0.829579	NA
1700013N18Rik	7.38415	3.35109	2.00551	1.67094	0.0947335	0.997447
1700015E13Rik	3.92045	-4.15095	2.95358	-1.4054	0.159903	NA
1700015F17Rik	1.27951	-3.36403	4.23691	-0.793983	0.427206	NA
1700016C15Rik	31.0382	-0.783422	1.09115	-0.717977	0.472771	0.997447
1700016D06Rik	121.884	0.742579	0.560305	1.32531	0.185067	0.997447
1700016G22Rik	1.43917	-2.30531	2.9962	-0.769411	0.441649	NA
1700016H13Rik	4.17381	-1.00227	2.07851	-0.482205	0.62966	NA
1700016K19Rik	140.731	0.340312	0.586025	0.580712	0.561435	0.997447
1700016M24Rik	0.997804	0	4.32799	0	1	NA
1700017B05Rik	860.765	0.033328	0.270187	0.123352	0.901828	1
1700018A04Rik	8.74579	0.380924	1.01119	0.376707	0.706391	0.997447
1700018F24Rik	1.30199	-2.13708	4.27775	-0.499579	0.617371	NA
1700018L02Rik	22.8834	1.02964	0.773148	1.33175	0.182941	0.997447
1700019B03Rik	2.22001	3.81561	3.59293	1.06198	0.288246	NA
1700019D03Rik	17.6569	0.828001	1.21242	0.68293	0.494651	0.997447
1700019E19Rik	891.753	0.276405	0.251292	1.09993	0.271361	0.997447
1700019G17Rik	370.377	-0.741151	0.455254	-1.62799	0.103526	0.997447
1700019L03Rik	57.6928	0.0549502	0.683073	0.0804456	0.935883	1
1700019N12Rik	3.89664	2.30794	2.71904	0.848808	0.395988	NA
1700020D05Rik	1.81895	1.36778	3.22738	0.423806	0.671708	NA
1700020G17Rik	2.91197	1.58737	1.61602	0.98227	0.325967	NA
1700020I14Rik	621.919	0.000366121	0.29923	0.00122354	0.999024	1
1700020L24Rik	1.64686	-0.520023	3.0147	-0.172496	0.863048	NA
1700020N18Rik	3.79308	-2.0451	2.10854	-0.969913	0.33209	NA
1700020O03Rik	407.067	-0.229891	0.321395	-0.715293	0.474428	0.997447
1700021C14Rik	38.6333	0.388197	0.5555	0.698824	0.484662	0.997447
1700021F05Rik	274.993	0.194533	0.244731	0.794886	0.42668	0.997447
1700021K19Rik	890.098	-0.511279	0.299069	-1.70957	0.087346	0.997447
1700022I11Rik	4.33486	1.2859	3.39483	0.378783	0.704849	NA
1700022P22Rik	1.59938	3.84844	3.11225	1.23654	0.216256	NA
1700023E05Rik	21.1558	0.149139	0.88481	0.168555	0.866147	0.999684
1700023F06Rik	3.425	-4.18459	2.87042	-1.45783	0.144888	NA
1700023L04Rik	16.0219	-0.444904	1.01864	-0.436761	0.662285	0.997447
1700024G13Rik	17.6265	-0.515532	1.34408	-0.383559	0.701305	0.997447
1700024P16Rik	9.4379	-2.88525	2.48933	-1.15905	0.246437	0.997447
1700025C18Rik	1.83562	0.0672605	2.1824	0.0308195	0.975414	NA
1700025E21Rik	1.83359	2.22561	4.06246	0.547847	0.583797	NA
1700025G04Rik	55.869	0.220012	0.868642	0.253282	0.80005	0.997447
1700025K23Rik	47.8033	0.902444	0.691741	1.3046	0.192029	0.997447
1700025K24Rik	6.5414	0.365947	1.19533	0.306147	0.759493	0.997447
1700025N23Rik	67.1645	0.875626	0.542112	1.61521	0.106265	0.997447
1700026D08Rik	77.9131	0.759204	0.656138	1.15708	0.24724	0.997447
1700026D11Rik	1.93253	0.000381654	2.32603	0.00016408	0.999869	NA
1700026L06Rik	178.434	0.692972	0.76118	0.910392	0.362616	0.997447
1700027A23Rik	282.383	0.506311	0.476183	1.06327	0.287659	0.997447
1700027D21Rik	1.12759	0.96239	4.11603	0.233815	0.815128	NA
1700028D13Rik	3.99062	1.6356	2.38416	0.686027	0.492696	NA
1700028E10Rik	10.4542	1.76996	1.13075	1.5653	0.117513	0.997447
1700028J19Rik	14.5365	-0.55032	1.30506	-0.421682	0.673257	0.997447
1700028K03Rik	12.6513	-0.95746	1.31356	-0.728904	0.466061	0.997447
1700028P14Rik	32.3905	-0.464116	0.752296	-0.616932	0.537279	0.997447
1700029F09Rik	552.655	-0.160186	0.223641	-0.716264	0.473829	0.997447
1700029F12Rik	4.03366	1.32644	1.39649	0.949838	0.342194	NA
1700029G01Rik	417.179	0.287501	0.286329	1.0041	0.315333	0.997447
1700029I01Rik	89.247	-0.274928	0.541078	-0.508111	0.611376	0.997447
1700029I15Rik	6.7953	0.38804	1.20353	0.322419	0.747135	0.997447
1700029J07Rik	112.142	0.20145	0.583293	0.345366	0.729819	0.997447
1700029J11Rik	2.92541	-2.85953	3.1271	-0.914436	0.360488	NA
1700030C10Rik	32.5466	0.794092	0.613376	1.29463	0.195449	0.997447
1700030J22Rik	70.294	0.48541	0.828024	0.586228	0.557723	0.997447
1700030K09Rik	234.93	-0.223837	0.34764	-0.643875	0.519656	0.997447
1700034E13Rik	1.16097	-1.92529	4.28892	-0.448898	0.653505	NA
1700034F02Rik	2.5217	-1.7449	3.14815	-0.554264	0.579398	NA
1700034H14Rik	454.43	0.0640534	0.254026	0.252153	0.800923	0.997447
1700034H15Rik	28.5304	0.486792	0.750419	0.648694	0.516536	0.997447
1700034I23Rik	6.24772	0.171262	2.88707	0.0593203	0.952697	1
1700034J05Rik	3.75103	1.53665	2.60015	0.590987	0.554529	NA
1700034P13Rik	14.0396	0.93099	1.05715	0.880662	0.378501	0.997447
1700037C18Rik	118.501	0.0550969	0.410409	0.134249	0.893206	1
1700037H04Rik	834.232	-0.0678529	0.240333	-0.282329	0.777691	0.997447
1700040I03Rik	289.01	0.15976	0.263125	0.607166	0.543741	0.997447
1700040L02Rik	33.548	-0.468976	0.815056	-0.575391	0.565027	0.997447
1700040N02Rik	1.10873	-0.75874	4.21139	-0.180164	0.857024	NA
1700045H11Rik	1.84026	-0.785864	2.40589	-0.326641	0.743939	NA
1700045I19Rik	5.53942	-4.00364	3.11402	-1.28568	0.198554	NA
1700047I17Rik2	3077.88	-0.261337	0.335483	-0.778988	0.435987	0.997447
1700048M11Rik	2.86936	0.53576	2.61197	0.205117	0.83748	NA
1700048O20Rik	63.4335	0.764082	0.569078	1.34267	0.17938	0.997447
1700049E15Rik	41.984	-1.52946	1.25237	-1.22126	0.221989	0.997447
1700049G17Rik	207.131	-0.268003	0.581075	-0.46122	0.644641	0.997447
1700052K11Rik	190.829	0.737883	0.301503	2.44735	0.0143912	0.790732
1700052N19Rik	260.481	-0.0807217	0.280609	-0.287666	0.773603	0.997447
1700054N08Rik	23.0851	1.5836	0.824897	1.91976	0.0548887	0.958059
1700055N04Rik	4.99228	-1.76792	3.2459	-0.544661	0.585987	NA
1700056E22Rik	17.0202	-1.7748	1.04277	-1.702	0.0887545	0.997447
1700057H15Rik	1.10038	1.87043	3.0899	0.605337	0.544955	NA
1700061G19Rik	13.1878	-0.918768	1.03848	-0.884726	0.376305	0.997447
1700061I17Rik	4.30043	1.77551	1.96045	0.905667	0.365112	NA
1700061J05Rik	0.794558	-3.09303	4.24324	-0.72893	0.466045	NA
1700063D05Rik	24.6693	1.06079	0.687511	1.54294	0.122846	0.997447
1700064J06Rik	36.1471	0.777347	0.909713	0.854497	0.39283	0.997447
1700065D16Rik	16.0839	1.07391	0.801699	1.33954	0.180394	0.997447
1700066B19Rik	127.3	0.820961	0.729478	1.12541	0.260416	0.997447
1700066J24Rik	1.34554	-0.812744	3.17751	-0.25578	0.798121	NA
1700066M21Rik	171.633	-0.179008	0.413244	-0.433178	0.664885	0.997447
1700067G17Rik	1.63952	0.624255	3.27576	0.190568	0.848864	NA
1700067K01Rik	9.69811	0.664075	1.57792	0.420856	0.67386	0.997447
1700071M16Rik	11.0995	0.443458	2.17701	0.2037	0.838588	0.998189
1700073E17Rik	9.54041	0.712754	1.0211	0.698023	0.485163	0.997447
1700081L11Rik	967.714	0.0846509	0.200926	0.421304	0.673533	0.997447
1700084C01Rik	3.97498	2.13524	2.89732	0.736973	0.461139	NA
1700084E18Rik	10.5603	-1.94259	1.08017	-1.79841	0.0721128	0.997447
1700086L19Rik	11.0247	-4.2201	2.33829	-1.80478	0.0711088	0.997447
1700086O06Rik	64.627	-0.229082	0.487787	-0.469636	0.638615	0.997447
1700088E04Rik	270.494	0.0540015	0.410296	0.131616	0.895288	1
1700092M07Rik	2.47555	1.4197	2.53967	0.55901	0.576155	NA
1700094D03Rik	378.873	0.506515	0.380886	1.32983	0.183573	0.997447
1700096K18Rik	113.936	0.0953239	0.387887	0.245752	0.805875	0.997447
1700097N02Rik	3.7857	1.67927	2.51891	0.666666	0.504986	NA
1700101E01Rik	14.551	-0.857182	1.0512	-0.815435	0.414824	0.997447
1700101I11Rik	2.32792	-4.61967	3.98841	-1.15827	0.246753	NA
1700102H20Rik	11.2824	-0.448047	0.986967	-0.453963	0.649855	0.997447
1700102P08Rik	4.58018	-1.21829	1.96807	-0.619029	0.535897	NA
1700105P06Rik	2.36867	2.40122	3.04815	0.787763	0.430835	NA
1700106N22Rik	154.508	-0.0562225	0.44175	-0.127272	0.898725	1
1700109H08Rik	4.90688	1.007	1.65452	0.608638	0.542765	NA
1700110C19Rik	1.76189	0.993628	2.7104	0.366598	0.713919	NA
1700110K17Rik	4.66734	-3.77312	2.6355	-1.43165	0.152244	NA
1700110M21Rik	1.38879	0.331807	3.40889	0.0973357	0.92246	NA
1700112E06Rik	148.942	0.261214	0.268748	0.971966	0.331068	0.997447
1700113A16Rik	151.609	-0.234916	0.362789	-0.647529	0.51729	0.997447
1700113H08Rik	0.931434	-3.31352	4.238	-0.781859	0.434298	NA
1700113I22Rik	129.897	-0.0928872	0.423017	-0.219583	0.826196	0.997447
1700120C14Rik	4.75616	-1.50092	1.94327	-0.772365	0.439898	NA
1700120E14Rik	8.46532	0.731923	1.38551	0.528271	0.597311	0.997447
1700120K04Rik	4.412	0.594107	1.52721	0.389015	0.697265	NA
1700121L16Rik	3.75693	0.42312	1.58277	0.267329	0.789216	NA
1700123I01Rik	5.78959	1.63981	1.40947	1.16342	0.244658	NA
1700123M08Rik	28.1909	0.370485	0.738331	0.501787	0.615817	0.997447
1700123O20Rik	1001.38	-0.166922	0.206621	-0.807867	0.419167	0.997447
1700125D06Rik	7.78674	1.67366	1.40134	1.19433	0.232347	0.997447
1700125G22Rik	1.74359	0.378028	2.4541	0.154039	0.877579	NA
1700125H20Rik	7.91485	0.872539	1.41806	0.615306	0.538352	0.997447
1700128F08Rik	66.6089	0.575813	0.55938	1.02938	0.303303	0.997447
1810006J02Rik	1.36831	-2.42574	4.20565	-0.576783	0.564086	NA
1810006K21Rik	2828.62	-0.0332173	0.188465	-0.176252	0.860096	0.999684
1810007D17Rik	2.68796	1.97636	1.62073	1.21943	0.222682	NA
1810007I06Rik	5.7793	0.381044	1.6879	0.22575	0.821396	NA
1810008A18Rik	505.058	0.0351504	0.24356	0.14432	0.885248	1
1810008I18Rik	58.3857	-0.0163945	0.641581	-0.0255532	0.979614	1
1810009A15Rik	626.86	0.0249588	0.21502	0.116077	0.907592	1
1810010D01Rik	110.722	-0.398442	0.68921	-0.578113	0.563188	0.997447
1810010H24Rik	571.323	0.840267	0.548952	1.53067	0.12585	0.997447
1810011H11Rik	13.0499	6.43586	2.34595	2.74339	0.00608087	0.624091
1810011O10Rik	458.38	-0.507935	0.473489	-1.07275	0.283384	0.997447
1810012K16Rik	5.25477	-1.10345	2.32316	-0.474978	0.634803	NA
1810012P15Rik	206.079	-0.360786	0.406256	-0.888076	0.3745	0.997447
1810013A23Rik	1.74635	-0.513642	2.54003	-0.202219	0.839746	NA
1810013D10Rik	1166.22	-0.221372	0.215687	-1.02636	0.304723	0.997447
1810013L24Rik	1250.02	-0.101657	0.17581	-0.578222	0.563115	0.997447
1810014B01Rik	116.131	-0.786166	0.449073	-1.75064	0.0800074	0.997447
1810014F10Rik	189.101	-0.00503914	0.382537	-0.013173	0.98949	1
1810018F18Rik	3.4945	0.120695	2.08286	0.057947	0.953791	NA
1810019D21Rik	812.697	0.113399	0.216228	0.524439	0.599973	0.997447
1810019J16Rik	841.797	-0.0435178	0.202925	-0.214453	0.830194	0.997447
1810020D17Rik	343.948	0.336422	0.237999	1.41354	0.157496	0.997447
1810020O05Rik	4.7331	-0.15163	2.79944	-0.0541646	0.956804	NA
1810021B22Rik	29.6003	-0.144804	0.802122	-0.180527	0.856739	0.999684
1810022K09Rik	1885.41	0.0114888	0.17234	0.0666637	0.946849	1
1810024B03Rik	14.2248	0.318668	0.813572	0.39169	0.695287	0.997447
1810026B05Rik	853.554	0.65477	0.260314	2.51531	0.0118928	0.783043
1810026J23Rik	921.382	-0.0935149	0.191375	-0.488646	0.625092	0.997447
1810027O10Rik	1065.72	0.219376	0.231113	0.949215	0.342511	0.997447
1810029B16Rik	171.283	-0.076705	0.320213	-0.239544	0.810684	0.997447
1810030N24Rik	282.246	0.0477319	0.34768	0.137287	0.890804	1
1810030O07Rik	1113.89	0.204394	0.172805	1.1828	0.236889	0.997447
1810031K17Rik	1899.22	-0.324068	0.139197	-2.32812	0.0199058	0.839013
1810032O08Rik	174.351	0.400618	0.275591	1.45366	0.146039	0.997447
1810033B17Rik	221.241	1.90261	0.861043	2.20966	0.0271288	0.871696
1810034E14Rik	29.3212	-0.360435	1.02848	-0.350452	0.725999	0.997447
1810035I16Rik	41.4435	0.613581	0.712398	0.86129	0.389078	0.997447
1810035L17Rik	907.756	0.0111454	0.25394	0.0438899	0.964992	1
1810037I17Rik	2535.66	0.217807	0.224522	0.970093	0.332	0.997447
1810041L15Rik	2.51135	-2.07315	3.38149	-0.613089	0.539818	NA
1810043G02Rik	515.225	0.115863	0.284703	0.40696	0.684037	0.997447
1810043H04Rik	471.979	0.266441	0.225664	1.1807	0.237722	0.997447
1810044D09Rik	43.502	0.445993	0.585291	0.762002	0.446059	0.997447
1810046J19Rik	1652.83	-0.144702	0.164039	-0.882118	0.377713	0.997447
1810046K07Rik	2.99984	-0.581437	2.9745	-0.195474	0.845022	NA
1810048J11Rik	572.879	0.0275189	0.267104	0.103027	0.917942	1
1810049H13Rik	129.306	0.276968	0.427776	0.64746	0.517334	0.997447
1810055G02Rik	769.644	-0.374202	0.262523	-1.42541	0.15404	0.997447
1810058I24Rik	1479.65	-0.225753	0.158451	-1.42475	0.15423	0.997447
1810062G17Rik	54.6287	0.506129	0.465064	1.0883	0.276463	0.997447
1810062O18Rik	22.1265	0.27242	0.706235	0.385736	0.699692	0.997447
1810063B05Rik	303.443	-0.251299	0.248734	-1.01032	0.312344	0.997447
1810063B07Rik	504.408	0.240441	0.184813	1.301	0.193259	0.997447
1810064F22Rik	164.541	0.457934	0.334188	1.37029	0.170597	0.997447
1810074P20Rik	835.399	-0.206698	0.203368	-1.01638	0.309449	0.997447
2010001E11Rik	12.8372	0.380578	1.15922	0.328306	0.742681	0.997447
2010001M06Rik	22.0017	-1.42692	1.10904	-1.28663	0.198223	0.997447
2010001M09Rik	3.30149	0.444691	2.3019	0.193184	0.846815	NA
2010002M12Rik	50.0595	-0.206996	0.703248	-0.294343	0.768496	0.997447
2010002N04Rik	510.964	0.378248	0.211227	1.79072	0.0733383	0.997447
2010003K11Rik	7.63394	0.927951	1.74315	0.53234	0.594491	0.997447
2010003O02Rik	147.247	0.56093	0.38555	1.45488	0.145702	0.997447
2010005H15Rik	22.9147	0.0529697	0.997422	0.0531067	0.957647	1
2010009K17Rik	2.55399	-2.84748	2.97676	-0.956573	0.338783	NA
2010010A06Rik	0.890033	-0.296503	4.18446	-0.070858	0.943511	NA
2010011I20Rik	1092.19	-0.33525	0.251595	-1.3325	0.182696	0.997447
2010012O05Rik	372.827	0.000671829	0.308927	0.00217472	0.998265	1
2010015L04Rik	108.634	0.531338	0.508971	1.04395	0.29651	0.997447
2010016I18Rik	147.963	0.349114	0.402072	0.868287	0.385237	0.997447
2010106G01Rik	3021.29	-0.141098	0.175781	-0.80269	0.422154	0.997447
2010107E04Rik	2383.45	0.04248	0.199041	0.213423	0.830997	0.997447
2010107G12Rik	24.9981	0.818117	0.844637	0.968602	0.332744	0.997447
2010107G23Rik	522.703	-0.149002	0.242819	-0.613635	0.539457	0.997447
2010107H07Rik	160.751	0.255982	0.269502	0.949834	0.342197	0.997447
2010109I03Rik	138.162	1.00194	0.348372	2.87607	0.00402656	0.575466
2010109K11Rik	413.705	0.0342963	0.465007	0.0737543	0.941206	1
2010110P09Rik	0.632614	0	4.32799	0	1	NA
2010111I01Rik	582.123	0.293701	0.212708	1.38078	0.167348	0.997447
2010204K13Rik	155.197	-0.00740212	0.295794	-0.0250246	0.980035	1
2010300C02Rik	754.623	0.137974	0.224089	0.615711	0.538085	0.997447
2010305A19Rik	311.286	0.263054	0.335133	0.784925	0.432498	0.997447
2010310C07Rik	1.20481	-3.24637	4.23952	-0.765741	0.44383	NA
2010317E24Rik	52.6843	0.123433	0.860511	0.143442	0.885941	1
2010320M18Rik	207.791	0.334064	0.276421	1.20853	0.226842	0.997447
2010321M09Rik	641.403	0.0756629	0.261129	0.289753	0.772005	0.997447
2200002D01Rik	2144.74	0.0551193	0.24394	0.225955	0.821236	0.997447
2200002J24Rik	6.77375	-4.57552	3.11974	-1.46663	0.142476	0.997447
2200002K05Rik	176.009	-0.829481	0.520339	-1.59411	0.11091	0.997447
2210009G21Rik	135.747	-0.0664292	0.485919	-0.136708	0.891261	1
2210010C04Rik	7.14769	-0.505781	1.20953	-0.418162	0.675829	0.997447
2210010C17Rik	687.878	0.0517161	1.16523	0.0443826	0.964599	1
2210012G02Rik	262.632	0.493747	0.282731	1.74635	0.0807507	0.997447
2210013O21Rik	544.001	-0.182615	0.230611	-0.791872	0.428435	0.997447
2210015D19Rik	291.153	-0.162039	0.348526	-0.464925	0.641985	0.997447
2210016F16Rik	1310.91	-0.275349	0.182665	-1.5074	0.131707	0.997447
2210016L21Rik	428.26	0.248702	0.209251	1.18853	0.234624	0.997447
2210018M11Rik	550.567	-0.144103	0.340442	-0.423281	0.67209	0.997447
2210019I11Rik	9.81482	1.27698	2.08963	0.611103	0.541131	0.997447
2210020M01Rik	101.989	0.192852	0.627366	0.3074	0.758539	0.997447
2210021J22Rik	449.742	0.0275818	0.2697	0.102269	0.918544	1
2210039B01Rik	117.369	0.732979	0.567849	1.2908	0.196773	0.997447
2210403K04Rik	868.984	0.596033	0.286009	2.08396	0.0371636	0.912372
2210404J11Rik	355.223	0.0536005	0.260894	0.20545	0.837221	0.998189
2210404O07Rik	67.7189	-0.640971	0.716172	-0.894996	0.370789	0.997447
2210404O09Rik	211.162	-0.102342	0.320079	-0.319741	0.749165	0.997447
2210407C18Rik	162.384	1.41197	0.543459	2.59811	0.00937372	0.708141
2210408F21Rik	152.038	-0.0799802	0.387965	-0.206153	0.836671	0.998189
2210408I21Rik	155.38	0.22977	0.445304	0.515984	0.605866	0.997447
2210409D07Rik	1.82847	0.248058	4.03018	0.0615502	0.950921	NA
2210411K11Rik	769.787	0.0386777	0.230505	0.167796	0.866744	0.999684
2210415F13Rik	58.9175	0.113113	0.778852	0.145231	0.884529	1
2210416O15Rik	1.64692	1.25846	2.52919	0.497574	0.618785	NA
2210417A02Rik	14.3157	-0.0209111	1.00758	-0.0207539	0.983442	1
2210417K05Rik	20.9097	-0.40412	0.870484	-0.464247	0.642471	0.997447
2210420H20Rik	5.5115	1.23545	1.62805	0.758852	0.447941	NA
2300002M23Rik	24.3887	1.29782	1.73444	0.748266	0.4543	0.997447
2300009A05Rik	225.07	0.0121268	0.316702	0.0382909	0.969456	1
2310001A20Rik	1913.38	0.0403147	0.210261	0.191737	0.847949	0.999112
2310001H17Rik	30.4898	-0.374841	0.842484	-0.444924	0.656375	0.997447
2310001K24Rik	14.1645	-0.200137	0.89863	-0.222714	0.823758	0.997447
2310002D06Rik	14.1181	-0.208394	0.980382	-0.212564	0.831667	0.997447
2310002J15Rik	81.9161	1.0944	0.961491	1.13823	0.255025	0.997447
2310002L13Rik	48.5733	-1.21399	1.14702	-1.05839	0.289878	0.997447
2310003C23Rik	395.964	-0.299731	0.212682	-1.40929	0.158749	0.997447
2310003F16Rik	1712.82	-0.0113503	0.148373	-0.0764979	0.939023	1
2310003H01Rik	455.193	0.0416881	0.24176	0.172436	0.863095	0.999684
2310003L22Rik	160.881	0.522949	0.403473	1.29612	0.194934	0.997447
2310004I24Rik	444.224	-0.0146837	0.234958	-0.062495	0.950169	1
2310004N24Rik	746.323	-0.0863573	0.211689	-0.407943	0.683315	0.997447
2310005A03Rik	10.8879	0.859184	0.92929	0.92456	0.355195	0.997447
2310007B03Rik	1707.44	-0.0557521	0.217064	-0.256846	0.797297	0.997447
2310007L24Rik	319.458	0.130594	0.365668	0.357137	0.720989	0.997447
2310008H04Rik	626.916	0.10343	0.193745	0.533848	0.593447	0.997447
2310008H09Rik	1192.91	0.0191231	0.131602	0.14531	0.884466	1
2310009A05Rik	239.28	-0.100167	0.287254	-0.348705	0.727311	0.997447
2310009B15Rik	194.279	-0.495664	0.388368	-1.27627	0.201859	0.997447
2310010J17Rik	39.9192	-0.34201	0.59252	-0.577213	0.563796	0.997447
2310010M20Rik	5.50298	0.580032	1.30386	0.444856	0.656424	NA
2310011J03Rik	758.299	-0.0566664	0.21826	-0.259627	0.795151	0.997447
2310014F07Rik	4.67207	1.29959	2.87113	0.452638	0.650809	NA
2310014L17Rik	183.378	0.0186361	0.405768	0.0459281	0.963368	1
2310015A10Rik	171.411	-0.317108	0.424771	-0.746539	0.455342	0.997447
2310015B20Rik	1.18462	-1.15788	4.23854	-0.273179	0.784716	NA
2310015D24Rik	7.65057	1.47028	1.29782	1.13288	0.257264	0.997447
2310016M24Rik	1706.35	0.0688773	0.200667	0.343243	0.731416	0.997447
2310021P13Rik	926.885	0.312656	0.263991	1.18434	0.236277	0.997447
2310022A10Rik	200.299	0.011682	0.423101	0.0276106	0.977973	1
2310022B05Rik	1276.01	-0.283454	0.26751	-1.0596	0.289326	0.997447
2310028H24Rik	104.547	0.515361	0.31673	1.62713	0.10371	0.997447
2310030G06Rik	662.083	-0.259358	0.209354	-1.23885	0.215401	0.997447
2310030N02Rik	184.701	-0.278009	0.414188	-0.671213	0.502085	0.997447
2310033E01Rik	9.97233	0.686527	1.70277	0.403182	0.686814	0.997447
2310033P09Rik	253.419	0.0295914	0.24805	0.119296	0.905041	1
2310034G01Rik	145.181	0.449618	0.548702	0.819422	0.412546	0.997447
2310034O05Rik	9.03176	1.39695	1.05734	1.3212	0.186436	0.997447
2310035C23Rik	845.498	0.106817	0.180823	0.590723	0.554706	0.997447
2310035K24Rik	537.371	-0.0643017	0.295912	-0.2173	0.827974	0.997447
2310036O22Rik	1746.47	-0.164698	0.160322	-1.0273	0.30428	0.997447
2310037I24Rik	1931.11	-0.227636	0.213775	-1.06484	0.28695	0.997447
2310039H08Rik	438.294	0.230128	0.298176	0.771783	0.440243	0.997447
2310039L15Rik	203.044	0.553873	0.424469	1.30486	0.19194	0.997447
2310040G24Rik	59.1484	-0.44934	0.635366	-0.707215	0.479433	0.997447
2310042D19Rik	81.6549	0.304432	0.533117	0.571041	0.567972	0.997447
2310043J07Rik	135.831	0.857844	0.802691	1.06871	0.2852	0.997447
2310043L19Rik	3.06708	1.98657	2.82841	0.702361	0.482454	NA
2310043O21Rik	2.56455	-0.558235	2.24263	-0.24892	0.803422	NA
2310044G17Rik	793.357	-0.278238	0.186412	-1.4926	0.135542	0.997447
2310044H10Rik	1804.31	-0.0823087	0.159647	-0.515568	0.606156	0.997447
2310045N01Rik	539.98	-0.0799701	0.231095	-0.346048	0.729307	0.997447
2310046A06Rik	0.794558	-3.09303	4.24324	-0.72893	0.466045	NA
2310046K01Rik	649.683	-0.140995	0.437445	-0.322314	0.747215	0.997447
2310046O06Rik	333.152	-0.205202	0.3728	-0.550434	0.582021	0.997447
2310047B19Rik	188.797	-0.378625	0.317173	-1.19375	0.232577	0.997447
2310047M10Rik	115.588	0.290778	0.351552	0.827128	0.408164	0.997447
2310057M21Rik	239.014	-0.134232	0.332889	-0.403235	0.686775	0.997447
2310061C15Rik	229.593	0.176483	0.314029	0.561995	0.574119	0.997447
2310061I04Rik	315.901	0.239123	0.261925	0.912942	0.361273	0.997447
2310061J03Rik	89.6243	0.256199	0.438001	0.584928	0.558596	0.997447
2310067B10Rik	1131.81	-0.260605	0.251088	-1.0379	0.299315	0.997447
2310068J16Rik	13.8501	-0.792916	1.03882	-0.763285	0.445294	0.997447
2310069B03Rik	10.4474	-0.108786	1.32678	-0.0819928	0.934652	1
2310079F23Rik	155.333	0.502825	0.380219	1.32246	0.186015	0.997447
2400001E08Rik	1588.77	-0.25305	0.159112	-1.59039	0.111748	0.997447
2400003C14Rik	3329.17	-0.0611985	0.173453	-0.352824	0.72422	0.997447
2400009B08Rik	46.4396	-0.200804	0.853488	-0.235275	0.813996	0.997447
2410001C21Rik	1902.42	-0.0689532	0.142666	-0.483321	0.628868	0.997447
2410002F23Rik	1107.37	0.223237	0.294983	0.756777	0.449183	0.997447
2410002I01Rik	295.523	-0.0291063	0.326808	-0.0890622	0.929032	1
2410002O22Rik	1135	-0.14542	0.202552	-0.717937	0.472796	0.997447
2410003K15Rik	478.019	-0.0545482	0.240734	-0.226591	0.820741	0.997447
2410003L11Rik	3.4525	3.97212	2.82301	1.40705	0.159412	NA
2410004A20Rik	15.4088	-0.172141	0.937827	-0.183553	0.854364	0.999684
2410004B18Rik	271.166	0.254589	0.306766	0.829911	0.406589	0.997447
2410004I01Rik	2.24257	1.62453	4.01273	0.404846	0.685591	NA
2410004N09Rik	100.679	0.16555	0.363661	0.455232	0.648942	0.997447
2410004P03Rik	317.326	0.135016	0.568925	0.237317	0.812411	0.997447
2410006H16Rik	803.47	0.0554002	0.171284	0.32344	0.746362	0.997447
2410007B07Rik	18.0639	0.178965	0.793682	0.225487	0.821601	0.997447
2410015M20Rik	1209.62	-0.178941	0.154586	-1.15755	0.247048	0.997447
2410016O06Rik	240.864	0.15242	0.300748	0.506801	0.612294	0.997447
2410017I17Rik	5.47375	0.182655	1.48944	0.122633	0.902398	NA
2410017P09Rik	277.967	-0.0473511	0.368354	-0.128548	0.897715	1
2410018L13Rik	143.076	0.058062	0.324963	0.178673	0.858195	0.999684
2410018M08Rik	106.241	-0.396665	0.369638	-1.07312	0.283219	0.997447
2410021H03Rik	5.97654	0.973927	1.20431	0.808699	0.418689	0.997447
2410022L05Rik	311.92	-0.121652	0.377902	-0.321914	0.747518	0.997447
2410042D21Rik	770.901	-0.230873	0.263806	-0.875163	0.381485	0.997447
2410057H14Rik	7.32462	-1.22578	1.43347	-0.85511	0.39249	0.997447
2410066E13Rik	39.926	-0.933324	0.782913	-1.19212	0.233215	0.997447
2410075B13Rik	154.184	-0.0263544	0.462179	-0.0570221	0.954528	1
2410076I21Rik	7.94945	0.740479	1.87209	0.395535	0.692448	0.997447
2410088K16Rik	8.21912	0.687721	1.05573	0.651417	0.514777	0.997447
2410089E03Rik	577.598	0.344319	0.282636	1.21824	0.223132	0.997447
2410091C18Rik	713.215	-0.130184	0.234672	-0.554748	0.579067	0.997447
2410114N07Rik	14.8433	0.131913	0.874833	0.150787	0.880144	1
2410124H12Rik	6.93546	-0.126808	1.8996	-0.0667548	0.946777	1
2410127L17Rik	1183	-0.0500702	0.243989	-0.205215	0.837404	0.998189
2410131K14Rik	349.785	-0.123106	0.25982	-0.473814	0.635633	0.997447
2410137M14Rik	2.24181	-3.05906	3.15974	-0.968136	0.332977	NA
2500003M10Rik	1918.08	-0.0263406	0.170891	-0.154136	0.877502	1
2500004C02Rik	236.507	0.180121	0.442835	0.406746	0.684195	0.997447
2510002D24Rik	632.239	0.166598	0.250034	0.666302	0.505218	0.997447
2510003E04Rik	803.383	-0.270245	0.204594	-1.32088	0.18654	0.997447
2510006D16Rik	1274.76	0.155789	0.199387	0.781338	0.434604	0.997447
2510009E07Rik	1279.46	-0.392259	0.230414	-1.70241	0.0886787	0.997447
2510012J08Rik	589.342	-0.20743	0.213349	-0.972259	0.330922	0.997447
2510039O18Rik	1426.62	0.0920016	0.212148	0.433667	0.66453	0.997447
2510049J12Rik	171.133	-0.34954	0.453699	-0.770423	0.441049	0.997447
2600006L11Rik	8.01996	1.56714	1.31009	1.19621	0.231616	0.997447
2610001J05Rik	2214.87	-0.354699	0.177167	-2.00206	0.0452784	0.938123
2610002D18Rik	17.9542	0.892135	0.957502	0.931731	0.351475	0.997447
2610002I17Rik	152.158	0.15059	0.559641	0.269084	0.787865	0.997447
2610002J02Rik	786.082	-0.0728289	0.171898	-0.423676	0.671802	0.997447
2610002M06Rik	616.817	-0.488826	0.217543	-2.24704	0.0246376	0.857901
2610005L07Rik	1381.79	0.348216	0.305617	1.13939	0.254541	0.997447
2610008E11Rik	352.679	0.0877563	0.404743	0.21682	0.828349	0.997447
2610015P09Rik	230.398	0.527648	0.41738	1.26419	0.206162	0.997447
2610016A17Rik	1.30581	-2.12251	4.27847	-0.496091	0.61983	NA
2610018G03Rik	91.1528	-0.325368	0.438016	-0.742823	0.457589	0.997447
2610019E17Rik	31.0587	0.359871	0.685898	0.524672	0.599811	0.997447
2610019F03Rik	118.594	-0.414357	0.577013	-0.718108	0.472691	0.997447
2610020C07Rik	32.063	0.955139	0.799974	1.19396	0.232492	0.997447
2610020H08Rik	82.0195	0.211681	0.621397	0.340653	0.733365	0.997447
2610021K21Rik	34.4937	0.537986	0.877501	0.613089	0.539817	0.997447
2610027L16Rik	1070.78	-0.0948085	0.193584	-0.489753	0.624308	0.997447
2610028E06Rik	3.01065	0.761509	2.16335	0.352004	0.724835	NA
2610028H24Rik	782.756	0.485209	0.379051	1.28006	0.200523	0.997447
2610029G23Rik	718.732	0.0954861	0.247194	0.38628	0.69929	0.997447
2610029I01Rik	174.117	0.407713	0.399697	1.02006	0.307702	0.997447
2610034B18Rik	661.418	-0.202125	0.257338	-0.785448	0.432191	0.997447
2610035D17Rik	172.818	-0.224846	0.515011	-0.436584	0.662413	0.997447
2610037D02Rik	44.0098	0.862708	0.625958	1.37822	0.168136	0.997447
2610039C10Rik	279.061	-0.098052	0.30644	-0.319971	0.74899	0.997447
2610044O15Rik	472.736	0.149558	0.234724	0.637165	0.524017	0.997447
2610100L16Rik	3.24078	0.159227	1.61732	0.0984508	0.921574	NA
2610101N10Rik	1230.63	-0.119982	0.182322	-0.658076	0.510489	0.997447
2610109H07Rik	6.18888	0.814086	1.90242	0.427921	0.668709	0.997447
2610203C20Rik	72.6664	-0.0381494	0.940629	-0.0405573	0.967649	1
2610203C22Rik	2.92467	1.47023	2.44055	0.602419	0.546895	NA
2610204G22Rik	6.84554	-0.539071	1.72263	-0.312935	0.75433	0.997447
2610206C17Rik	44.856	-0.176689	0.52585	-0.336007	0.736866	0.997447
2610301B20Rik	576.899	0.201139	0.303387	0.662979	0.507344	0.997447
2610301G19Rik	1469.44	-0.00457174	0.199757	-0.0228865	0.981741	1
2610305D13Rik	16.6665	0.985536	2.22398	0.44314	0.657664	0.997447
2610306M01Rik	115.127	0.0779762	0.430642	0.18107	0.856313	0.999684
2610307P16Rik	91.7653	-0.420752	0.536346	-0.784479	0.432759	0.997447
2610316D01Rik	1.09635	0	4.32799	0	1	NA
2610318N02Rik	14.0782	-1.30553	1.90639	-0.68482	0.493458	0.997447
2610507B11Rik	4537.14	-0.0946206	0.165883	-0.570405	0.568403	0.997447
2610507I01Rik	84.9468	0.935515	0.577783	1.61915	0.105416	0.997447
2610524H06Rik	469.059	0.338154	0.2059	1.64232	0.100524	0.997447
2610528A11Rik	3.74955	3.78846	2.68005	1.41358	0.157486	NA
2610528E23Rik	195.443	-0.147958	0.292961	-0.505042	0.613529	0.997447
2610528J11Rik	561.466	-0.191907	0.19891	-0.964793	0.334649	0.997447
2700007P21Rik	377.657	-0.239841	0.245311	-0.977703	0.328221	0.997447
2700023E23Rik	102.784	0.509209	0.649989	0.783412	0.433385	0.997447
2700029M09Rik	417.475	0.189906	0.274885	0.690857	0.489656	0.997447
2700038G22Rik	162.812	0.0105903	0.438388	0.0241573	0.980727	1
2700046G09Rik	31.7082	0.107262	0.78974	0.135819	0.891964	1
2700049A03Rik	336.112	0.14226	0.332329	0.42807	0.6686	0.997447
2700050L05Rik	728.515	-0.174863	0.363543	-0.480998	0.630518	0.997447
2700054A10Rik	41.7853	0.0975559	0.763179	0.127828	0.898285	1
2700060E02Rik	1797.58	0.0165435	0.15971	0.103584	0.917499	1
2700062C07Rik	292.977	0.259877	0.348404	0.745906	0.455724	0.997447
2700069I18Rik	12.342	-0.387527	1.13426	-0.341656	0.73261	0.997447
2700070H01Rik	30.5365	0.160948	0.679646	0.236811	0.812803	0.997447
2700078E11Rik	670.019	-0.261282	0.210417	-1.24173	0.214334	0.997447
2700081L22Rik	1.7712	-1.86843	3.79881	-0.491846	0.622828	NA
2700081O15Rik	55.0053	0.73814	0.48004	1.53767	0.12413	0.997447
2700089E24Rik	1504.08	-0.334344	0.194164	-1.72197	0.085075	0.997447
2700089I24Rik	11.171	1.07484	1.3445	0.799436	0.424038	0.997447
2700090O03Rik	1.246	4.43246	3.96777	1.11712	0.263945	NA
2700094K13Rik	978.16	0.0560241	0.247352	0.226495	0.820816	0.997447
2700097O09Rik	311.921	-0.0680228	0.271224	-0.250799	0.80197	0.997447
2700099C18Rik	38.7243	0.746267	0.99445	0.750432	0.452995	0.997447
2810001G20Rik	92.2655	-0.374256	0.485099	-0.771503	0.440409	0.997447
2810002D19Rik	60.0449	-0.59703	0.479723	-1.24453	0.213304	0.997447
2810002N01Rik	577.532	0.20269	0.280068	0.723717	0.46924	0.997447
2810004N23Rik	693.338	-0.14522	0.204488	-0.710164	0.477603	0.997447
2810006K23Rik	269.199	0.0650807	0.358242	0.181667	0.855844	0.999684
2810008D09Rik	262.574	0.286262	0.334889	0.854796	0.392664	0.997447
2810008M24Rik	1440.01	-0.117856	0.185424	-0.635604	0.525035	0.997447
2810013P06Rik	294.495	-0.0412784	0.377653	-0.109303	0.912963	1
2810021B07Rik	680.999	0.0569967	0.222397	0.256284	0.797732	0.997447
2810021J22Rik	262.784	-0.193825	0.304755	-0.636002	0.524775	0.997447
2810025M15Rik	136.191	0.598042	0.776367	0.770309	0.441117	0.997447
2810029C07Rik	36.7474	-0.121618	1.1129	-0.109281	0.91298	1
2810030E01Rik	53.563	-0.80784	1.00236	-0.805939	0.420278	0.997447
2810032G03Rik	10.1501	-2.94294	2.62182	-1.12248	0.261659	0.997447
2810046L04Rik	297.321	0.355937	0.332135	1.07166	0.283871	0.997447
2810047C21Rik1	178.338	-0.750115	0.787417	-0.952627	0.340779	0.997447
2810049E08Rik	17.4929	0.549699	0.72492	0.75829	0.448278	0.997447
2810055F11Rik	29.459	0.448341	0.794103	0.564587	0.572355	0.997447
2810055G20Rik	65.1384	0.24814	0.574771	0.43172	0.665945	0.997447
2810403A07Rik	1926.76	0.142195	0.21125	0.673115	0.500874	0.997447
2810403D21Rik	29.7846	0.146279	0.644251	0.227052	0.820383	0.997447
2810405K02Rik	181.797	-0.327759	0.350552	-0.93498	0.349799	0.997447
2810407C02Rik	974.527	0.207997	0.172044	1.20898	0.226672	0.997447
2810408A11Rik	138.705	-0.803862	0.482133	-1.6673	0.095454	0.997447
2810408I11Rik	16.7081	-0.609168	0.970529	-0.627666	0.530223	0.997447
2810408M09Rik	449.958	0.143534	0.269775	0.532052	0.59469	0.997447
2810410L24Rik	25.2519	-0.807635	0.73381	-1.10061	0.271068	0.997447
2810417H13Rik	139.413	0.393944	0.600934	0.655553	0.512112	0.997447
2810422J05Rik	767.132	0.227142	0.235618	0.964027	0.335032	0.997447
2810422O20Rik	108.667	0.521392	0.34222	1.52356	0.12762	0.997447
2810428I15Rik	797.833	0.0573694	0.186981	0.306819	0.758981	0.997447
2810429I04Rik	1.29067	-0.343303	2.42372	-0.141643	0.887362	NA
2810432D09Rik	301.227	0.121542	0.369231	0.329175	0.742023	0.997447
2810432L12Rik	1058.11	0.30936	0.337623	0.916288	0.359516	0.997447
2810433D01Rik	27.126	-0.0370555	0.727723	-0.0509198	0.959389	1
2810442I21Rik	3.76771	1.17909	2.0612	0.57204	0.567295	NA
2810442N19Rik	3.28661	-0.0145592	2.8437	-0.0051198	0.995915	NA
2810453I06Rik	185.146	0.31856	0.350862	0.907936	0.363912	0.997447
2810454H06Rik	45.272	-0.230666	0.74605	-0.309183	0.757183	0.997447
2810459M11Rik	235.032	-0.394136	0.468966	-0.840435	0.400664	0.997447
2810474O19Rik	4142.65	-0.053669	0.167303	-0.320789	0.74837	0.997447
2900002K06Rik	7.66692	1.85235	1.30887	1.41523	0.157001	0.997447
2900005J15Rik	203.67	0.0233509	0.444416	0.0525428	0.958096	1
2900006K08Rik	45.5191	0.252666	0.82836	0.30502	0.760351	0.997447
2900008C10Rik	5.03128	0.847379	1.73806	0.487544	0.625873	NA
2900009J06Rik	14.0802	-0.417151	1.32717	-0.314317	0.75328	0.997447
2900010M23Rik	976.913	0.0170508	0.209799	0.081272	0.935226	1
2900011O08Rik	0.954696	-2.77778	4.25225	-0.653249	0.513596	NA
2900026A02Rik	857.528	0.255864	0.32597	0.78493	0.432494	0.997447
2900041M22Rik	2.39111	-1.76611	3.23132	-0.54656	0.584681	NA
2900053A13Rik	492.785	-0.0600963	0.209727	-0.286545	0.77446	0.997447
2900056M20Rik	185.256	-0.266236	0.446148	-0.596744	0.550678	0.997447
2900060B14Rik	80.8849	0.323225	0.517171	0.624988	0.531979	0.997447
2900064A13Rik	1873.63	0.0304164	0.209256	0.145355	0.884431	1
2900076A07Rik	96.6699	0.000925164	0.55817	0.0016575	0.998678	1
2900079G21Rik	1.6643	-0.164003	3.37444	-0.0486016	0.961237	NA
2900092E17Rik	439.425	0.0579063	0.254408	0.227612	0.819948	0.997447
2900093L17Rik	3.19672	0.418287	2.64694	0.158027	0.874436	NA
2900097C17Rik	8038.21	-0.108157	0.202213	-0.534865	0.592743	0.997447
3000002C10Rik	39.5283	-0.180756	0.879391	-0.205547	0.837145	0.998189
3010026O09Rik	105.646	0.354653	0.533986	0.664162	0.506586	0.997447
3110001D03Rik	350.971	-0.00995443	0.301946	-0.0329675	0.9737	1
3110001I22Rik	92.0272	0.552447	0.440578	1.25391	0.209874	0.997447
3110002H16Rik	889.562	-0.308361	0.246541	-1.25075	0.211027	0.997447
3110003A17Rik	705.187	0.162371	0.237872	0.682598	0.494861	0.997447
3110007F17Rik	4.97282	0.0562829	2.27039	0.0247899	0.980223	NA
3110009E18Rik	57.216	-0.0315634	0.491819	-0.0641768	0.948829	1
3110009F21Rik	14.4382	-0.498334	1.94696	-0.255954	0.797986	0.997447
3110015C05Rik	18.1719	0.976526	1.00982	0.967034	0.333527	0.997447
3110021A11Rik	17.8474	0.0913517	0.97183	0.0939997	0.925109	1
3110021N24Rik	86.9278	0.425417	0.425261	1.00037	0.317132	0.997447
3110035E14Rik	3.20147	6.18833	4.09114	1.51262	0.130377	NA
3110040N11Rik	250.696	0.113382	0.319804	0.354536	0.722938	0.997447
3110043O21Rik	463.467	0.316111	0.26843	1.17763	0.238945	0.997447
3110045C21Rik	6.12828	-5.87851	3.28084	-1.79177	0.0731699	0.997447
3110052M02Rik	182.183	-0.113866	0.377396	-0.301715	0.762869	0.997447
3110056K07Rik	107.157	0.176504	0.574093	0.307448	0.758503	0.997447
3110056O03Rik	754.899	0.216108	0.277515	0.778725	0.436142	0.997447
3110057O12Rik	91.9545	0.119093	0.502336	0.237078	0.812596	0.997447
3110062M04Rik	233.555	-0.303438	0.285548	-1.06265	0.28794	0.997447
3110070M22Rik	10.4365	-0.326467	1.48591	-0.219708	0.826099	0.997447
3110082I17Rik	432.921	0.29362	0.28423	1.03304	0.301587	0.997447
3110099E03Rik	10.5951	1.35447	1.00738	1.34454	0.178773	0.997447
3200001D21Rik	28.6274	1.18432	0.656383	1.8043	0.0711835	0.997447
3200002M19Rik	237.04	0.19651	0.215097	0.913586	0.360934	0.997447
3230401D17Rik	1836.92	-0.132604	0.137497	-0.964414	0.334838	0.997447
3300002I08Rik	30.4958	0.313183	0.743006	0.421508	0.673384	0.997447
3300005D01Rik	3.15872	-3.18314	2.9114	-1.09334	0.274246	NA
3632451O06Rik	2.12545	-4.4807	4.22033	-1.06169	0.288374	NA
3632454L22Rik	18.393	0.716771	1.01557	0.705782	0.480324	0.997447
3830403N18Rik	1.53008	-3.42757	2.94628	-1.16335	0.244686	NA
3830406C13Rik	530.358	-0.18273	0.232161	-0.787086	0.431232	0.997447
3830408C21Rik	28.942	-0.400531	0.983255	-0.407352	0.683749	0.997447
3830431G21Rik	661.236	-0.134969	0.388273	-0.347613	0.728131	0.997447
3930402G23Rik	13.1293	-1.78349	1.61724	-1.1028	0.270114	0.997447
4430402I18Rik	31.2807	0.327593	0.740764	0.442237	0.658318	0.997447
4632411B12Rik	1136.52	0.197152	0.214037	0.92111	0.356993	0.997447
4632415K11Rik	376.572	-0.574535	0.38658	-1.4862	0.137226	0.997447
4632415L05Rik	472.299	-0.131625	0.236362	-0.55688	0.57761	0.997447
4632427E13Rik	132.194	0.34703	0.409657	0.847122	0.396927	0.997447
4632428C04Rik	57.2565	-0.896242	0.474972	-1.88693	0.0591692	0.976172
4632428N05Rik	65.093	0.912175	1.32664	0.687583	0.491715	0.997447
4632434I11Rik	45.1	-1.00237	0.697651	-1.43677	0.150782	0.997447
4732415M23Rik	16.6064	0.464374	0.888508	0.522644	0.601222	0.997447
4732416N19Rik	1.15581	-2.7812	3.70139	-0.751394	0.452416	NA
4732418C07Rik	1169.33	-0.090255	0.139672	-0.646192	0.518155	0.997447
4732456N10Rik	4.93357	0	4.32799	0	1	NA
4732471D19Rik	199.807	-0.00430884	0.458246	-0.00940289	0.992498	1
4732471J01Rik	28.9971	0.518213	0.738921	0.70131	0.483109	0.997447
4732490B19Rik	15.3258	1.4882	1.1371	1.30876	0.190615	0.997447
4732491K20Rik	36.2508	0.092037	0.765437	0.120241	0.904292	1
4831426I19Rik	21.2442	-1.17733	0.847109	-1.38982	0.164582	0.997447
4831440E17Rik	49.7472	0.283352	0.600588	0.47179	0.637077	0.997447
4832428D23Rik	4.42253	1.16726	2.29685	0.508199	0.611314	NA
4833403I15Rik	11.711	-0.687677	2.00876	-0.342339	0.732096	0.997447
4833412C05Rik	1.5698	1.93029	3.96883	0.486362	0.626711	NA
4833417C18Rik	41.6023	-0.294226	0.583344	-0.504378	0.613996	0.997447
4833418N02Rik	67.4443	0.351229	0.664877	0.528261	0.597318	0.997447
4833419F23Rik	11.7336	0.576282	1.50671	0.382477	0.702108	0.997447
4833420G17Rik	705.346	-0.122261	0.387833	-0.315242	0.752578	0.997447
4833422C13Rik	13.0111	0.000258007	1.02218	0.00025241	0.999799	1
4833423E24Rik	5.90034	0	2.91319	0	1	NA
4833427F10Rik	32.0009	0.233315	0.868254	0.268718	0.788147	0.997447
4833427G06Rik	43.3407	0.913478	0.676379	1.35054	0.176842	0.997447
4833439L19Rik	3515.74	-0.327128	0.114482	-2.85746	0.0042704	0.575466
4833442J19Rik	715.368	-0.218525	0.317235	-0.688844	0.490921	0.997447
4921504E06Rik	2.45162	-3.06131	4.24406	-0.721316	0.470715	NA
4921506M07Rik	56.8656	-0.0955743	0.681028	-0.140338	0.888393	1
4921507L20Rik	6.17204	-0.345359	1.18203	-0.292175	0.770152	0.997447
4921507P07Rik	89.6997	-0.466601	0.55492	-0.840845	0.400435	0.997447
4921508A21Rik	102.637	0.359761	0.39441	0.912149	0.36169	0.997447
4921509C19Rik	2.11704	1.10297	2.95592	0.373141	0.709044	NA
4921511C10Rik	11.1447	-0.786262	1.22084	-0.644032	0.519554	0.997447
4921513D23Rik	303.77	-0.118884	0.2956	-0.40218	0.687552	0.997447
4921513I03Rik	23.1801	0.357607	0.795775	0.449382	0.653156	0.997447
4921515E04Rik	83.7724	0.758061	0.448772	1.68919	0.0911831	0.997447
4921515J06Rik	9.96604	-0.469304	1.83533	-0.255706	0.798178	0.997447
4921517D22Rik	2.32678	-0.602629	2.62137	-0.229891	0.818177	NA
4921517L17Rik	27.5229	-0.395735	0.795924	-0.497203	0.619046	0.997447
4921523A10Rik	18.3208	0.839865	0.765261	1.09749	0.272428	0.997447
4921524J17Rik	319.141	-0.308181	0.285678	-1.07877	0.280691	0.997447
4921525B02Rik	5.04954	0.718335	2.02367	0.354966	0.722615	NA
4921530D09Rik	2.15584	0.0136503	2.09957	0.00650144	0.994813	NA
4921530L18Rik	22.4949	0.481647	0.803744	0.599255	0.549003	0.997447
4921531C22Rik	147.911	0.0627784	0.369048	0.170109	0.864924	0.999684
4921536K21Rik	15.3308	0.633797	1.08145	0.586062	0.557834	0.997447
4922501C03Rik	289.514	-0.0583059	0.420118	-0.138785	0.88962	1
4922501L14Rik	54.8935	-0.0884846	0.791005	-0.111863	0.910932	1
4922505G16Rik	4.15261	-1.14471	1.78534	-0.641173	0.52141	NA
4930402F11Rik	1.38544	1.08973	2.52126	0.432218	0.665583	NA
4930402H24Rik	649.08	-0.384778	0.286003	-1.34536	0.178508	0.997447
4930404I05Rik	6.08285	0.0553239	2.1452	0.0257897	0.979425	1
4930404N11Rik	61.7042	0.0217258	0.481493	0.0451217	0.96401	1
4930405A21Rik	3.98061	1.38548	1.6166	0.857037	0.391424	NA
4930405P13Rik	227.916	0.773609	0.486826	1.58909	0.11204	0.997447
4930412B13Rik	1.28387	1.17504	3.97794	0.29539	0.767696	NA
4930412C18Rik	10.6799	1.59222	2.16825	0.734337	0.462744	0.997447
4930413F20Rik	32.8456	0.74858	0.570523	1.31209	0.189488	0.997447
4930413G21Rik	76.8761	0.094389	0.463156	0.203795	0.838513	0.998189
4930414L22Rik	268.29	0.0492008	0.322517	0.152553	0.878751	1
4930415O20Rik	1.25305	-2.10772	4.26904	-0.493724	0.621501	NA
4930417G10Rik	3.88741	-0.176915	3.77539	-0.04686	0.962625	NA
4930417O22Rik	5.42817	0.52785	1.60951	0.327957	0.742944	NA
4930420K17Rik	2611.57	0.072949	0.299738	0.243376	0.807714	0.997447
4930422G04Rik	66.6152	1.08507	0.626531	1.73188	0.0832957	0.997447
4930425O10Rik	4.91968	-0.506952	1.56943	-0.323017	0.746682	NA
4930427A07Rik	257.559	-0.0130259	0.367154	-0.0354779	0.971699	1
4930429B21Rik	21.6946	-0.492073	1.06261	-0.463079	0.643307	0.997447
4930429D17Rik	2.18136	-0.508934	2.30188	-0.221095	0.825018	NA
4930429F24Rik	13.6989	-0.354535	1.03147	-0.343717	0.731059	0.997447
4930430F08Rik	151.083	-0.0571634	0.479172	-0.119296	0.905041	1
4930431P03Rik	8.91957	0.830716	1.22676	0.677164	0.498302	0.997447
4930432J09Rik	16.1989	0.367476	0.853768	0.430416	0.666893	0.997447
4930432K21Rik	42.9	-0.384342	0.756788	-0.507859	0.611552	0.997447
4930433N12Rik	4.68956	0.028561	1.86869	0.015284	0.987806	NA
4930440C22Rik	1.46376	1.10935	2.95786	0.375052	0.707622	NA
4930441O14Rik	21.3589	0.453646	1.47643	0.307258	0.758647	0.997447
4930443O20Rik	1.8791	-1.76588	4.14488	-0.426038	0.67008	NA
4930444A02Rik	716.3	-0.404813	0.242946	-1.66627	0.0956601	0.997447
4930444F02Rik	0.933585	-0.758095	4.25635	-0.178109	0.858637	NA
4930444G20Rik	6.75523	0.626665	1.46613	0.427429	0.669067	0.997447
4930444M15Rik	1.03924	1.36113	3.80154	0.358048	0.720308	NA
4930444P10Rik	11.2626	0.831885	1.36487	0.609495	0.542196	0.997447
4930448I06Rik	5.1735	1.26217	1.46812	0.859719	0.389944	NA
4930451C15Rik	197.932	0.666506	0.386419	1.72483	0.0845586	0.997447
4930452B06Rik	136.194	-0.0517221	0.444317	-0.116408	0.907329	1
4930453N24Rik	776.682	-0.155601	0.21577	-0.72114	0.470823	0.997447
4930455C13Rik	5.52506	0.93403	1.34247	0.695756	0.486581	NA
4930455C21Rik	176.259	-0.722304	0.525626	-1.37418	0.169386	0.997447
4930455F23Rik	467.862	0.383736	0.330883	1.15973	0.246158	0.997447
4930455H04Rik	4.7154	1.11221	2.11882	0.524918	0.59964	NA
4930461G14Rik	4.8666	-1.47715	3.56986	-0.413783	0.679033	NA
4930465K10Rik	3.9865	-1.36056	2.46529	-0.551884	0.581028	NA
4930467E23Rik	7.4513	-0.98374	2.64129	-0.372447	0.70956	0.997447
4930470H14Rik	972.753	0.483183	0.400504	1.20644	0.227649	0.997447
4930471I20Rik	2.64065	0.841641	2.18618	0.384982	0.700251	NA
4930471M23Rik	416.652	0.0516399	0.278116	0.185678	0.852698	0.999684
4930473A02Rik	3.45859	-0.146834	1.48381	-0.0989576	0.921172	NA
4930473A06Rik	99.467	0.213262	0.468547	0.455156	0.648997	0.997447
4930474G06Rik	21.1605	0.784973	0.799727	0.981551	0.326321	0.997447
4930478L05Rik	4.71587	2.29149	2.42109	0.946468	0.34391	NA
4930479D17Rik	1.75297	0.573308	4.0367	0.142024	0.887061	NA
4930481A15Rik	26.7941	0.723905	0.858338	0.84338	0.399016	0.997447
4930483J18Rik	1.3611	-3.84757	4.22816	-0.909988	0.362829	NA
4930483K19Rik	5.45113	2.14587	1.62056	1.32415	0.185453	NA
4930483O08Rik	7.31592	0.674126	1.80974	0.372499	0.709521	0.997447
4930487H11Rik	1.73149	2.33761	3.86696	0.604507	0.545506	NA
4930488B22Rik	11.2009	1.64842	1.03016	1.60015	0.109565	0.997447
4930500J02Rik	19.4029	0.69538	0.865565	0.803383	0.421753	0.997447
4930502A04Rik	2.36973	1.10178	3.17235	0.347309	0.728359	NA
4930502E09Rik	2.69045	-3.84181	3.17601	-1.20964	0.226419	NA
4930502E18Rik	5.98871	4.70738	2.55604	1.84167	0.0655237	0.988876
4930503L19Rik	24.5359	0.847742	0.72755	1.1652	0.243937	0.997447
4930505A04Rik	9.22847	-0.126441	1.34596	-0.0939408	0.925156	1
4930506M07Rik	884.498	0.170368	0.267718	0.636371	0.524535	0.997447
4930507D05Rik	11.3632	-0.775775	1.05499	-0.735336	0.462135	0.997447
4930509E16Rik	5.34931	-0.345332	1.5545	-0.222149	0.824198	NA
4930509J09Rik	1.05706	-2.50141	3.22953	-0.774544	0.438609	NA
4930509K18Rik	2.07376	0.941772	2.58263	0.364656	0.715368	NA
4930511A02Rik	1.87443	-0.840789	2.65909	-0.316194	0.751855	NA
4930511M06Rik	418.196	0.383945	0.407701	0.94173	0.346331	0.997447
4930511M11Rik	0.988409	0.603492	3.76408	0.160329	0.872622	NA
4930512B01Rik	4.73421	1.26496	1.38459	0.913599	0.360928	NA
4930513D17Rik	4.62787	-0.831187	2.39153	-0.347554	0.728175	NA
4930513N10Rik	20.7208	-1.05142	1.03355	-1.01729	0.309015	0.997447
4930515G01Rik	11.5685	0.562371	1.3919	0.404033	0.686189	0.997447
4930519F09Rik	113.683	0.94848	0.617103	1.53699	0.124296	0.997447
4930519H02Rik	5.33878	0.444068	2.12648	0.208828	0.834583	NA
4930520O04Rik	6.34235	3.69525	1.78757	2.0672	0.0387157	0.915852
4930520P13Rik	1.30369	1.08075	2.9472	0.366703	0.713841	NA
4930523C07Rik	2339.99	0.491831	0.214806	2.28965	0.0220414	0.847793
4930524L23Rik	6.29155	-1.2463	2.59434	-0.480393	0.630948	0.997447
4930525D18Rik	1.90207	1.9786	2.69991	0.732839	0.463656	NA
4930525G20Rik	22.7786	-0.527259	1.13423	-0.464861	0.642031	0.997447
4930526L06Rik	11.1437	0.32441	0.934489	0.347152	0.728477	0.997447
4930528A17Rik	28.8997	0.237866	0.822503	0.289197	0.77243	0.997447
4930528D03Rik	29.0753	0.592998	0.905838	0.654641	0.512699	0.997447
4930529M08Rik	30.5472	0.936739	0.725074	1.29192	0.196384	0.997447
4930533B01Rik	1.43324	-3.08231	4.07704	-0.756016	0.449639	NA
4930534B04Rik	155.645	-0.17557	0.603184	-0.291072	0.770996	0.997447
4930538K18Rik	6.14595	1.31163	2.38256	0.550511	0.581969	0.997447
4930539E08Rik	57.4715	0.881619	0.608269	1.44939	0.147228	0.997447
4930539J05Rik	28.4684	-0.538288	0.598829	-0.898901	0.368705	0.997447
4930544O15Rik	2.35614	3.00499	2.99348	1.00384	0.315454	NA
4930545H06Rik	3.13305	1.29067	1.91103	0.675377	0.499436	NA
4930545L23Rik	3.47526	-0.803787	2.05613	-0.390923	0.695855	NA
4930546K05Rik	19.1597	1.30961	0.761613	1.71952	0.0855202	0.997447
4930547N16Rik	47.5563	-0.218265	1.32671	-0.164516	0.869325	0.999684
4930548H24Rik	0.968474	0	4.32799	0	1	NA
4930548J01Rik	1.95101	3.84747	3.00354	1.28098	0.200202	NA
4930549G23Rik	19.7483	0.943185	0.860375	1.09625	0.27297	0.997447
4930550C14Rik	33.4469	-0.902671	0.843671	-1.06993	0.284649	0.997447
4930552P12Rik	4.71477	5.89952	4.09349	1.4412	0.149529	NA
4930555I21Rik	6.17125	0.47765	1.85226	0.257874	0.796504	0.997447
4930556M19Rik	266.793	-0.152257	0.371096	-0.410291	0.681592	0.997447
4930557A04Rik	2.10401	0	4.32799	0	1	NA
4930558C23Rik	1.7651	1.68325	3.91609	0.429829	0.66732	NA
4930558J18Rik	18.6377	1.01627	1.03101	0.985702	0.324279	0.997447
4930562C15Rik	270.388	0.354584	0.425842	0.832665	0.405034	0.997447
4930562F07Rik	252.824	0.611639	0.408994	1.49547	0.134792	0.997447
4930563E18Rik	7.63075	-0.700865	1.26971	-0.551988	0.580957	0.997447
4930563E22Rik	40.5742	-0.0530366	0.835571	-0.0634735	0.949389	1
4930563M20Rik	5.73858	0.00575234	1.36455	0.00421557	0.996636	NA
4930564K09Rik	12.7246	1.09352	1.39813	0.782133	0.434136	0.997447
4930565N06Rik	7.57805	1.72258	1.20366	1.43112	0.152395	0.997447
4930568E12Rik	1.49903	1.21863	2.53271	0.481155	0.630407	NA
4930568K20Rik	5.45206	1.16342	2.38535	0.487737	0.625736	NA
4930572J05Rik	335.149	0.276243	0.302836	0.912188	0.36167	0.997447
4930578C19Rik	1.72771	2.50972	4.13055	0.6076	0.543453	NA
4930578E11Rik	1.40127	1.48393	2.94479	0.503916	0.61432	NA
4930578M01Rik	2.68298	3.13808	2.51197	1.24925	0.211573	NA
4930578N16Rik	53.2821	0.818864	0.538338	1.5211	0.128236	0.997447
4930579C15Rik	2.78319	-0.337955	3.04688	-0.110919	0.911681	NA
4930579G18Rik	28.6326	0.544035	0.722463	0.753028	0.451433	0.997447
4930579G22Rik	20.6942	0.497429	0.77088	0.645274	0.51875	0.997447
4930579G24Rik	93.1704	0.690333	0.576328	1.19781	0.23099	0.997447
4930579K19Rik	22.8407	0.372551	0.755924	0.492842	0.622124	0.997447
4930581F22Rik	86.6601	0.637628	0.502278	1.26947	0.204273	0.997447
4930583H14Rik	3.02339	-0.688231	3.01228	-0.228475	0.819277	NA
4930583K01Rik	1.57126	3.99873	3.05713	1.308	0.190873	NA
4930588N13Rik	14.2846	-0.0151473	1.81547	-0.00834344	0.993343	1
4930592I03Rik	2.63776	3.32495	2.90461	1.14472	0.252326	NA
4930593C16Rik	2.17799	1.59751	2.70329	0.59095	0.554554	NA
4930594C11Rik	29.5475	1.32984	0.933979	1.42385	0.15449	0.997447
4930599N23Rik	5.43585	-0.0207001	1.63217	-0.0126826	0.989881	NA
4931402G19Rik	18.2282	0.287697	0.851271	0.337962	0.735392	0.997447
4931403G20Rik	12.5069	0.30286	1.19223	0.254027	0.799474	0.997447
4931406B18Rik	5.92739	0.0446727	1.32626	0.0336833	0.97313	NA
4931406C07Rik	344.213	0.167165	0.281815	0.593172	0.553066	0.997447
4931406H21Rik	113.947	1.12281	0.648978	1.73011	0.0836101	0.997447
4931406P16Rik	1089.77	0.0867088	0.249234	0.347901	0.727914	0.997447
4931408A02Rik	565.087	0.202013	0.349327	0.578292	0.563067	0.997447
4931408D14Rik	91.2027	-0.92637	0.660516	-1.40249	0.160768	0.997447
4931414P19Rik	51.8076	-0.259416	0.67978	-0.381618	0.702745	0.997447
4931417G12Rik	1.65047	1.85637	2.7298	0.680038	0.49648	NA
4931420L22Rik	9.99905	0.0654053	1.22403	0.0534343	0.957386	1
4931423N10Rik	2.41169	3.60106	4.11915	0.874224	0.381996	NA
4931428F04Rik	161.495	-0.45874	0.524778	-0.87416	0.382031	0.997447
4931428L18Rik	20.089	0.546714	0.771471	0.708664	0.478533	0.997447
4931429I11Rik	19.8552	-3.19295	1.25932	-2.53545	0.0112302	0.76906
4931429L15Rik	4.58011	0.422814	1.48851	0.284051	0.776371	NA
4931430N09Rik	4.67045	-2.27415	2.31834	-0.980939	0.326623	NA
4931431C16Rik	15.6439	1.05138	1.01501	1.03584	0.300278	0.997447
4931440F15Rik	3.27622	2.89552	3.16643	0.914443	0.360484	NA
4931440J10Rik	1.12736	-1.30656	2.79706	-0.467119	0.640415	NA
4931440P22Rik	36.2289	-0.0941738	0.60031	-0.156875	0.875343	0.999684
4932411E22Rik	7.04775	0.877537	2.31968	0.3783	0.705208	0.997447
4932411L15	1499.86	0.636924	0.325814	1.95487	0.0505986	0.956384
4932412D23Rik	1.50532	-0.876277	3.58415	-0.244487	0.806854	NA
4932412H11Rik	2.33062	1.16112	2.57281	0.451303	0.651771	NA
4932414N04Rik	11.6011	0.770911	0.965648	0.798336	0.424676	0.997447
4932415G12Rik	82.7791	0.502133	0.604765	0.830294	0.406373	0.997447
4932416H05Rik	131.233	-0.4246	0.402094	-1.05597	0.290981	0.997447
4932416K20Rik	0.963241	-1.48316	3.79082	-0.391252	0.695611	NA
4932418E24Rik	20.9384	-0.469829	1.35929	-0.345644	0.72961	0.997447
4932425I24Rik	77.2721	-0.0107677	0.844645	-0.0127482	0.989829	1
4932438A13Rik	1568.98	0.128452	0.224058	0.573297	0.566444	0.997447
4932438H23Rik	3.70404	-3.41681	2.3205	-1.47245	0.1409	NA
4932443I19Rik	6.26326	0.603712	1.59818	0.37775	0.705616	0.997447
4933400F21Rik	17.4927	0.740031	1.25085	0.591625	0.554102	0.997447
4933401D09Rik	7.11292	0.685511	1.31054	0.523077	0.600921	0.997447
4933401H06Rik	1.44061	0.971466	2.86201	0.339434	0.734283	NA
4933402N22Rik	1.87658	2.01507	3.71855	0.541895	0.587891	NA
4933403F05Rik	1075.19	-0.161681	0.175158	-0.923055	0.355979	0.997447
4933403G14Rik	79.2394	-0.426977	0.706995	-0.603933	0.545888	0.997447
4933404K08Rik	17.2369	0.807127	0.735673	1.09713	0.272585	0.997447
4933404M02Rik	175.901	-0.0477767	0.440248	-0.108522	0.913581	1
4933404O12Rik	98.4285	-0.827028	0.569168	-1.45305	0.146211	0.997447
4933405D12Rik	17.5744	0.529985	0.77746	0.681687	0.495437	0.997447
4933406C10Rik	16.3828	0.176539	0.97032	0.181939	0.85563	0.999684
4933407C03Rik	1423.22	0.21008	0.241202	0.870973	0.383769	0.997447
4933407G14Rik	12.9674	0.428738	0.984034	0.435694	0.663058	0.997447
4933407H18Rik	363.475	0.26887	0.222818	1.20668	0.227556	0.997447
4933407K13Rik	153.385	0.739856	0.666571	1.10994	0.267024	0.997447
4933407L21Rik	2.22751	1.35372	2.32458	0.582351	0.56033	NA
4933408B17Rik	10.8705	0.966883	1.0054	0.96169	0.336205	0.997447
4933408J17Rik	3.02396	0.479805	1.73004	0.277337	0.781521	NA
4933408N05Rik	76.7707	0.494295	0.462893	1.06784	0.285593	0.997447
4933409K07Rik	1653.03	0.216257	0.232859	0.928705	0.353042	0.997447
4933411E08Rik	17.8391	1.02488	1.03039	0.994657	0.319903	0.997447
4933411K16Rik	2.89659	-4.44645	3.55601	-1.2504	0.211152	NA
4933411K20Rik	470.051	0.0564747	0.214033	0.26386	0.791888	0.997447
4933412E12Rik	59.2616	-0.7417	0.672258	-1.1033	0.269898	0.997447
4933413J09Rik	26.6037	1.61049	0.958668	1.67993	0.0929719	0.997447
4933413L06Rik	11.3847	1.20801	1.18633	1.01827	0.308548	0.997447
4933416M06Rik	1.86064	0.513666	2.34538	0.219012	0.826641	NA
4933416M07Rik	22.7666	0.721828	0.996377	0.724453	0.468788	0.997447
4933417D19Rik	4.70957	-2.42044	1.69163	-1.43083	0.152479	NA
4933417O13Rik	2.81848	-2.70383	3.98047	-0.679274	0.496964	NA
4933421E11Rik	431.535	0.410496	0.244352	1.67994	0.0929693	0.997447
4933421O10Rik	216.347	0.0568179	0.348488	0.163041	0.870486	0.999684
4933422A05Rik	1.58404	2.04405	3.68312	0.554977	0.57891	NA
4933424B01Rik	901.833	-0.515661	0.218519	-2.35979	0.0182851	0.827404
4933424G05Rik	5.03991	3.23917	2.66133	1.21712	0.223557	NA
4933424G06Rik	1.96382	0.352716	3.31332	0.106454	0.915222	NA
4933425O20Rik	1.48284	2.32266	3.37104	0.689005	0.49082	NA
4933426D04Rik	8.88699	-0.425291	1.03813	-0.409669	0.682049	0.997447
4933426M11Rik	1671.92	-0.353436	0.160263	-2.20535	0.0274297	0.871696
4933427D06Rik	2.81863	3.24253	2.40516	1.34815	0.177609	NA
4933427D14Rik	329.155	0.685641	0.38926	1.7614	0.0781715	0.997447
4933427E11Rik	10.2047	-0.946117	1.0782	-0.877495	0.380218	0.997447
4933427G17Rik	2.59664	-2.20598	3.07864	-0.716543	0.473656	NA
4933428C19Rik	1.80715	0.523818	2.69537	0.19434	0.84591	NA
4933429O19Rik	3.27329	0.0449441	1.88818	0.0238029	0.98101	NA
4933430H15Rik	315.486	0.44855	0.729416	0.614944	0.538592	0.997447
4933430I17Rik	6.21045	-1.58034	1.62055	-0.975186	0.329468	0.997447
4933431E20Rik	189.997	0.305589	0.298935	1.02226	0.306658	0.997447
4933431G14Rik	22.8419	0.698077	1.23048	0.567321	0.570496	0.997447
4933432B09Rik	93.3073	0.849777	0.546505	1.55493	0.119963	0.997447
4933432I09Rik	1.67425	3.95042	4.13042	0.95642	0.33886	NA
4933433C11Rik	4.44912	-2.82987	2.47832	-1.14185	0.253516	NA
4933433G15Rik	9.42358	-0.297011	1.38019	-0.215196	0.829614	0.997447
4933433G19Rik	1.75372	-3.81284	3.36526	-1.133	0.257214	NA
4933433P14Rik	860.375	-0.184934	0.266517	-0.693894	0.487749	0.997447
4933434E20Rik	1472.09	0.0276995	0.205555	0.134755	0.892806	1
4933436C20Rik	73.4978	0.974639	0.683885	1.42515	0.154114	0.997447
4933437F05Rik	4.94394	-1.71327	2.19961	-0.778894	0.436042	NA
4933438K21Rik	7.57954	0.556763	1.50674	0.369514	0.711745	0.997447
4933439C10Rik	169.218	-0.394172	0.28473	-1.38437	0.166245	0.997447
4933439F18Rik	691.897	-0.481377	0.306567	-1.57022	0.116364	0.997447
4933439K11Rik	18.7322	0.229727	1.09857	0.209114	0.834359	0.998169
4933440J02Rik	7.27469	1.14031	1.28369	0.888308	0.374375	0.997447
4933440M02Rik	3.7905	-1.59006	3.28067	-0.484674	0.627907	NA
5031410I06Rik	2.08264	-4.45232	4.12762	-1.07867	0.280736	NA
5031414D18Rik	4.58873	-0.614368	3.2411	-0.189556	0.849657	NA
5031425E22Rik	345.686	0.0912325	0.326253	0.279637	0.779756	0.997447
5031426D15Rik	111.182	0.578679	0.551967	1.04839	0.294457	0.997447
5031434O11Rik	11.9723	0.3357	0.908442	0.369534	0.71173	0.997447
5031439G07Rik	521.977	0.536594	0.281166	1.90846	0.0563316	0.967266
5033403H07Rik	22.9959	-0.160652	0.79492	-0.202099	0.83984	0.998189
5033406O09Rik	106.146	-0.197937	0.349522	-0.566309	0.571184	0.997447
5033411D12Rik	89.5005	0.320842	0.506404	0.63357	0.526362	0.997447
5033414D02Rik	805.402	-0.377155	0.437169	-0.862722	0.38829	0.997447
5133401N09Rik	365.23	0.105232	0.25493	0.41279	0.679761	0.997447
5330413P13Rik	17.1968	1.44325	1.25065	1.154	0.248499	0.997447
5330417C22Rik	2102.29	-0.333556	0.321614	-1.03713	0.299674	0.997447
5330426P16Rik	106.252	0.359638	0.60476	0.594679	0.552058	0.997447
5330437I02Rik	39.2817	0.391722	0.767186	0.510596	0.609634	0.997447
5430402O13Rik	6.27998	-3.08674	1.83406	-1.68301	0.0923738	0.997447
5430405G05Rik	1.40013	-2.47294	4.26301	-0.580093	0.561852	NA
5430405H02Rik	239.931	0.312533	0.35898	0.870615	0.383964	0.997447
5430407P10Rik	1522.13	-0.384528	0.234301	-1.64117	0.100762	0.997447
5430411K18Rik	417.533	0.216144	0.308214	0.701278	0.48313	0.997447
5430416N02Rik	161.856	0.00393759	0.351538	0.0112011	0.991063	1
5430416O09Rik	383.405	-0.0906449	0.445014	-0.20369	0.838596	0.998189
5430417L22Rik	303.921	0.453361	0.377612	1.2006	0.229906	0.997447
5430419D17Rik	2.69407	0	4.32799	0	1	NA
5430421F17Rik	21.7551	0.731154	1.14717	0.637353	0.523895	0.997447
5430421N21Rik	3.4024	-2.55553	2.48478	-1.02847	0.303728	NA
5430427M07Rik	7.36207	1.21763	1.04823	1.1616	0.245396	0.997447
5430427O19Rik	69.9827	1.04294	0.627588	1.66183	0.0965469	0.997447
5430428K19Rik	2.34353	2.185	2.98615	0.731714	0.464343	NA
5430435G22Rik	54.1678	-0.523185	1.10755	-0.472378	0.636657	0.997447
5430437J10Rik	8.67459	0.492643	1.19851	0.411046	0.681039	0.997447
5430437P03Rik	1076.39	-0.0834738	0.181547	-0.459791	0.645667	0.997447
5430440P10Rik	8.65803	0.3391	1.34434	0.252243	0.800854	0.997447
5530601H04Rik	169.892	0.290494	0.366885	0.791786	0.428485	0.997447
5730403B10Rik	1803.84	-0.00690124	0.149569	-0.0461409	0.963198	1
5730403I07Rik	21.7971	1.00787	0.715431	1.40877	0.158904	0.997447
5730405O15Rik	9.78218	-1.24795	1.37085	-0.910349	0.362638	0.997447
5730408K05Rik	35.4186	0.255087	0.649881	0.392513	0.694679	0.997447
5730409E04Rik	82.7901	-0.219683	0.578647	-0.379649	0.704206	0.997447
5730419I09Rik	563.613	0.121633	0.223631	0.5439	0.586511	0.997447
5730420D15Rik	50.5569	-0.0754838	0.507357	-0.148779	0.881728	1
5730422E09Rik	8.00077	0.343864	1.19785	0.287067	0.774061	0.997447
5730437N04Rik	615.288	-0.500678	0.475023	-1.05401	0.291879	0.997447
5730455O13Rik	208.12	-0.274526	0.289472	-0.948369	0.342942	0.997447
5730455P16Rik	603.192	0.0694095	0.330737	0.209863	0.833774	0.998017
5730460C07Rik	3.95855	1.07151	1.97963	0.541269	0.588322	NA
5730469M10Rik	7996.13	0.0978939	0.298555	0.327892	0.742993	0.997447
5730480H06Rik	22.8381	0.767333	1.02515	0.748509	0.454153	0.997447
5730494M16Rik	274.742	0.360856	0.27991	1.28918	0.197334	0.997447
5730494N06Rik	1045.43	-0.0361123	0.177949	-0.202936	0.839185	0.998189
5730507C01Rik	224.204	0.403642	0.31573	1.27844	0.201094	0.997447
5730508B09Rik	647.6	0.421251	0.285316	1.47643	0.139827	0.997447
5730522E02Rik	1.49849	-1.47367	3.45978	-0.425945	0.670148	NA
5730528L13Rik	57.8716	0.670521	0.663896	1.00998	0.312505	0.997447
5730559C18Rik	1465.23	-0.393627	0.245546	-1.60307	0.108919	0.997447
5730577I03Rik	105.422	-0.0616746	0.39022	-0.158051	0.874417	0.999684
5730590G19Rik	45.7711	2.00723	1.13925	1.76189	0.0780883	0.997447
5830411N06Rik	3.47938	0	4.32799	0	NA	NA
5830415F09Rik	142.379	-0.352292	0.483164	-0.729136	0.465919	0.997447
5830416P10Rik	89.5591	-0.930117	0.641236	-1.45051	0.146917	0.997447
5830417I10Rik	1041.83	0.126039	0.188403	0.668986	0.503505	0.997447
5830418K08Rik	258.161	-0.115584	0.357763	-0.323076	0.746638	0.997447
5830418P13Rik	1.69801	-0.45589	2.47565	-0.18415	0.853896	NA
5830428M24Rik	266.35	0.272952	0.361285	0.755504	0.449947	0.997447
5830432E09Rik	3.02131	-4.08661	2.35897	-1.73237	0.0832071	NA
5830433M19Rik	283.894	-0.11993	0.282101	-0.425133	0.67074	0.997447
5830473C10Rik	3.53316	-0.568161	1.81053	-0.313809	0.753666	NA
5930403L14Rik	259.439	0.101892	0.3409	0.298892	0.765022	0.997447
5930412G12Rik	7.46664	0.823598	1.52187	0.541176	0.588386	0.997447
5930416I19Rik	466.988	-0.313133	0.222586	-1.40679	0.159489	0.997447
5930434B04Rik	1034.2	-0.317212	0.154901	-2.04783	0.0405767	0.923897
6030407O03Rik	1.38823	-0.868632	3.83552	-0.22647	0.820836	NA
6030408B16Rik	113.316	0.578511	0.618447	0.935426	0.349569	0.997447
6030419C18Rik	1.23272	-2.47294	4.26301	-0.580093	0.561852	NA
6030422M02Rik	181.951	0.742553	0.446707	1.66228	0.0964561	0.997447
6030429G01Rik	164.823	0.534647	0.506874	1.05479	0.29152	0.997447
6030440G07Rik	14.8964	0.143144	0.83157	0.172138	0.863329	0.999684
6030446N20Rik	190.423	-0.216193	0.422309	-0.511932	0.608699	0.997447
6030458C11Rik	753.504	-0.0197073	0.248794	-0.0792115	0.936864	1
6230400D17Rik	28.8437	0.710972	0.8534	0.833106	0.404785	0.997447
6230409E13Rik	99.1132	-0.817646	1.80094	-0.454011	0.649821	0.997447
6230427J02Rik	5.32058	-0.892974	2.18144	-0.409351	0.682282	NA
6330403K07Rik	3.59227	-1.11363	3.58536	-0.310603	0.756102	NA
6330406I15Rik	256.935	0.894257	0.611866	1.46153	0.143871	0.997447
6330407A03Rik	18.0149	0.409097	1.19432	0.342534	0.731949	0.997447
6330407J23Rik	2.13608	-1.28636	3.1912	-0.403096	0.686878	NA
6330408A02Rik	90.8348	-0.153682	0.583185	-0.263522	0.792149	0.997447
6330409D20Rik	1.02745	0	4.32799	0	1	NA
6330409N04Rik	591.081	-0.0486873	0.238035	-0.204538	0.837933	0.998189
6330410L21Rik	21.7714	0.759505	0.757711	1.00237	0.316166	0.997447
6330416G13Rik	961.429	0.0431991	0.323253	0.133639	0.893688	1
6330418K02Rik	27.3884	0.0791594	0.65322	0.121183	0.903546	1
6330439K17Rik	128.542	-0.352343	0.567295	-0.621093	0.534538	0.997447
6330503K22Rik	535.516	0.212623	0.415958	0.511165	0.609236	0.997447
6330512M04Rik	25.0005	1.01055	0.797248	1.26755	0.20496	0.997447
6330545A04Rik	4.52305	-0.637414	1.84871	-0.344789	0.730253	NA
6330549D23Rik	6.13622	2.44547	2.16795	1.12801	0.259314	0.997447
6330578E17Rik	2248.04	-0.225338	0.135816	-1.65913	0.0970886	0.997447
6430527G18Rik	1852.26	-0.469907	0.189832	-2.47538	0.0133095	0.789943
6430531B16Rik	37.1997	1.61244	0.739205	2.18131	0.0291605	0.87427
6430548G04	39.1792	0.572603	0.666947	0.858543	0.390593	0.997447
6430548M08Rik	291.373	0.344925	0.453309	0.760904	0.446714	0.997447
6430550D23Rik	24.1336	0.959248	0.753058	1.2738	0.202733	0.997447
6430562O15Rik	1.68145	-2.11291	3.95618	-0.534078	0.593288	NA
6430571L13Rik	11.1694	0.605666	1.73412	0.349264	0.726891	0.997447
6430573F11Rik	39.159	-0.317219	0.776732	-0.408402	0.682979	0.997447
6430598A04Rik	56.8182	0.145209	0.603973	0.240423	0.810002	0.997447
6430704M03Rik	2.07218	-4.44256	4.22071	-1.05256	0.292541	NA
6430706D22Rik	665.62	0.105689	0.422256	0.250295	0.802359	0.997447
6530401N04Rik	432.601	-0.421421	0.347304	-1.21341	0.224975	0.997447
6530402F18Rik	2.52397	-4.72904	4.21808	-1.12114	0.262229	NA
6530418L21Rik	114.419	0.508245	0.723916	0.702077	0.482631	0.997447
6720401G13Rik	1887.5	0.3417	0.309793	1.103	0.270028	0.997447
6720456B07Rik	2485.28	-0.261275	0.175021	-1.49282	0.135485	0.997447
6720456H20Rik	395.943	-0.107715	0.321597	-0.334938	0.737672	0.997447
6720463M24Rik	122.98	0.0952291	0.55106	0.172811	0.8628	0.999684
6720468P15Rik	4.71731	-0.855765	3.4704	-0.24659	0.805226	NA
6720483E21Rik	7.34813	-0.728389	1.79579	-0.40561	0.685029	0.997447
6720489N17Rik	97.9742	-0.97074	0.78554	-1.23576	0.216547	0.997447
6820408C15Rik	84.7802	0.123598	0.651892	0.189598	0.849624	0.999684
6820431F20Rik	10056.8	0.260402	0.217775	1.19574	0.231799	0.997447
7420700N18Rik	4.52904	-0.552617	1.52128	-0.363257	0.716413	NA
7420701I03Rik	2.0657	-0.985125	1.96274	-0.501914	0.615728	NA
7530416G11Rik	1.39535	2.06416	3.48926	0.591576	0.554135	NA
7530420F21Rik	4.54718	-2.08907	1.98275	-1.05363	0.292054	NA
8030423F21Rik	52.6395	0.592376	0.710467	0.833783	0.404403	0.997447
8030442B05Rik	38.1917	-0.368291	0.763373	-0.482452	0.629485	0.997447
8030462N17Rik	218.278	0.528417	0.46106	1.14609	0.251758	0.997447
8430403D17Rik	47.9862	1.24247	0.616166	2.01646	0.0437522	0.926284
8430406I07Rik	272.742	-1.04654	0.480027	-2.18018	0.0292444	0.87427
8430408G22Rik	3451.41	0.32962	0.653124	0.504682	0.613782	0.997447
8430410A17Rik	852.128	-0.22646	0.204351	-1.10819	0.267779	0.997447
8430410K20Rik	732.443	0.082594	0.238279	0.346628	0.728871	0.997447
8430419L09Rik	209.724	-0.267381	0.66191	-0.403954	0.686247	0.997447
8430427H17Rik	447.672	-0.256665	0.237801	-1.07933	0.28044	0.997447
8430429K09Rik	131.65	0.205444	0.489369	0.419814	0.674622	0.997447
9030025P20Rik	248.174	-0.0578614	0.357692	-0.161763	0.871492	0.999684
9030204H09Rik	7.77814	0.594681	1.2318	0.482774	0.629256	0.997447
9030224M15Rik	12.341	-2.76087	1.5353	-1.79826	0.0721363	0.997447
9030404E10Rik	28.3779	-0.550149	1.07598	-0.511302	0.60914	0.997447
9030418K01Rik	8.44315	2.47614	1.98336	1.24846	0.211864	0.997447
9030425E11Rik	57.2391	1.28332	1.2534	1.02387	0.305896	0.997447
9030617O03Rik	39.1644	1.16793	0.795575	1.46804	0.142094	0.997447
9030619P08Rik	7.78601	-0.871529	1.39511	-0.624701	0.532167	0.997447
9030624G23Rik	227.215	0.0481868	0.325471	0.148052	0.882301	1
9030624J02Rik	1295.62	-0.131596	0.232321	-0.56644	0.571095	0.997447
9030625A04Rik	234.661	0.385511	0.333575	1.15569	0.247806	0.997447
9130008F23Rik	485.661	0.376535	0.376471	1.00017	0.317228	0.997447
9130011E15Rik	282.155	0.286608	0.26268	1.09109	0.275232	0.997447
9130011J15Rik	2073.53	-0.12038	0.197696	-0.608917	0.542579	0.997447
9130014G24Rik	66.557	0.224661	1.22671	0.183142	0.854687	0.999684
9130015A21Rik	1.65621	0.67032	2.53632	0.264289	0.791558	NA
9130017N09Rik	448.976	-0.613213	0.360995	-1.69867	0.089381	0.997447
9130019O22Rik	176.738	-0.316484	0.496084	-0.637964	0.523497	0.997447
9130019P16Rik	4.55621	0.184957	2.45009	0.0754901	0.939825	NA
9130023H24Rik	150.045	-0.627744	0.595735	-1.05373	0.292006	0.997447
9130024F11Rik	1.45119	2.58322	3.42105	0.755096	0.450192	NA
9130204L05Rik	8.42097	0	3.69606	0	1	1
9130206I24Rik	3.45837	0.871341	2.98712	0.291699	0.770516	NA
9130209A04Rik	7.00485	0.107828	1.19846	0.0899722	0.928309	1
9130221F21Rik	76.0336	0.834183	0.451379	1.84807	0.0645915	0.985802
9130221H12Rik	49.4221	0.969706	0.550126	1.7627	0.0779516	0.997447
9130227L01Rik	14.8442	0.471719	0.890331	0.529824	0.596234	0.997447
9130230L23Rik	75.7	0.61625	0.722757	0.852638	0.39386	0.997447
9130401M01Rik	493.164	0.118929	0.232251	0.512071	0.608601	0.997447
9130404H23Rik	8.4313	0.103023	1.80301	0.0571395	0.954434	1
9130409I23Rik	8.29894	-0.427804	1.17222	-0.364953	0.715146	0.997447
9230102K24Rik	1.96369	0	4.32799	0	1	NA
9230104L09Rik	51.0306	-2.517	1.40268	-1.79443	0.0727452	0.997447
9230105E05Rik	8.53424	1.36676	1.35114	1.01156	0.311746	0.997447
9230110C19Rik	200.048	0.0567617	0.453014	0.125298	0.900288	1
9230112J17Rik	118.641	0.674303	0.445505	1.51357	0.130135	0.997447
9230114K14Rik	60.8542	0.466187	0.544382	0.85636	0.391799	0.997447
9230116N13Rik	35.0448	-0.0255031	0.668922	-0.0381257	0.969587	1
9330020H09Rik	87.4493	-0.383463	0.430783	-0.890155	0.373383	0.997447
9330133O14Rik	342.496	-0.0858701	0.242425	-0.354212	0.72318	0.997447
9330151L19Rik	169.257	0.208501	0.582898	0.357698	0.720569	0.997447
9330158H04Rik	65.2503	0.691495	0.571866	1.20919	0.22659	0.997447
9330159F19Rik	61.9926	-0.0198184	0.437213	-0.0453289	0.963845	1
9330159M07Rik	100.394	0.493589	0.625942	0.788555	0.430372	0.997447
9330175E14Rik	6.64008	1.13203	1.33461	0.848209	0.396321	0.997447
9330175M20Rik	1.98052	0.256089	4.26531	0.0600399	0.952124	NA
9330179D12Rik	9.35531	1.55694	1.75849	0.885387	0.375948	0.997447
9330182L06Rik	39.9743	-0.827332	0.758096	-1.09133	0.275129	0.997447
9330182O14Rik	1.56951	0.50324	2.44052	0.206202	0.836633	NA
9430008C03Rik	578.413	0.208287	0.289349	0.719844	0.471621	0.997447
9430015G10Rik	284.181	0.297093	0.594383	0.499834	0.617192	0.997447
9430016H08Rik	477.477	-0.262835	0.227524	-1.15519	0.248011	0.997447
9430018G01Rik	15.5559	0.635243	1.28364	0.494878	0.620686	0.997447
9430020K01Rik	350.263	0.442232	0.523515	0.844735	0.398259	0.997447
9430021M05Rik	7.55302	-0.176466	1.7327	-0.101845	0.91888	1
9430023L20Rik	1410.97	-0.109236	0.212872	-0.513155	0.607843	0.997447
9430037G07Rik	110.626	1.12574	0.638663	1.76265	0.0779595	0.997447
9430038I01Rik	234.378	0.244981	0.292136	0.838585	0.401702	0.997447
9430041J12Rik	2.38755	-2.12928	2.15633	-0.987455	0.32342	NA
9430060I03Rik	11.3724	0.64833	1.47622	0.439181	0.66053	0.997447
9430076C15Rik	4.09748	-0.92032	2.73289	-0.336758	0.7363	NA
9430083A17Rik	91.9241	-0.378799	0.491809	-0.770216	0.441172	0.997447
9430091E24Rik	29.626	0.326569	0.80542	0.405463	0.685137	0.997447
9530003J23Rik	30.5671	-0.620354	0.932288	-0.665411	0.505788	0.997447
9530008L14Rik	107.305	0.312949	0.857283	0.365047	0.715076	0.997447
9530026F06Rik	6.51605	-0.887274	1.94282	-0.456693	0.647892	0.997447
9530026P05Rik	58.0203	0.335882	0.514614	0.652689	0.513957	0.997447
9530027J09Rik	9.43688	-0.052068	1.27472	-0.0408466	0.967418	1
9530036O11Rik	71.017	0.273251	0.499075	0.547515	0.584025	0.997447
9530048J24Rik	4.57397	3.23741	2.19591	1.47429	0.140402	NA
9530052E02Rik	11.5012	0.717484	1.27302	0.563609	0.57302	0.997447
9530053A07Rik	146.159	-0.0114127	0.498049	-0.0229147	0.981718	1
9530059O14Rik	10.3481	0.676036	2.46109	0.27469	NA	NA
9530068E07Rik	5262.26	-0.214367	0.136016	-1.57604	0.115017	0.997447
9530077C05Rik	175.237	0.274014	0.338416	0.809697	0.418114	0.997447
9530080O11Rik	11.3162	-0.424376	1.03597	-0.409642	0.682068	0.997447
9530082P21Rik	317.984	0.269244	0.25113	1.07213	0.283662	0.997447
9530091C08Rik	81.9017	0.483613	0.584008	0.828093	0.407618	0.997447
9630028B13Rik	10.0968	-0.625595	1.34586	-0.464828	0.642054	0.997447
9630033F20Rik	139.697	0.493622	0.516458	0.955783	0.339182	0.997447
9830001H06Rik	394.128	-0.562414	0.366701	-1.53372	0.1251	0.997447
9830107B12Rik	18.6939	0.965332	0.917165	1.05252	0.292562	0.997447
9830132P13	16.1698	0.131037	0.967507	0.135438	0.892266	1
9830147E19Rik	289.245	0.11013	0.496716	0.221716	0.824535	0.997447
9830166K06Rik	15.8875	0.804207	0.917306	0.876706	0.380646	0.997447
9930005F22Rik	13.4129	1.64477	1.0114	1.62623	0.103901	0.997447
9930012K11Rik	574.218	0.214295	0.293591	0.729912	0.465444	0.997447
9930013L23Rik	1.19591	1.92596	2.94048	0.65498	0.512481	NA
9930014A18Rik	280.761	-0.0881164	0.420727	-0.209439	0.834106	0.998101
9930021D14Rik	2.49129	1.27855	4.00509	0.319232	0.749551	NA
9930021J03Rik	603.41	-0.185058	0.210865	-0.877615	0.380153	0.997447
9930023K05Rik	64.1687	0.421441	0.923532	0.456336	0.648148	0.997447
9930104L06Rik	282.403	-0.498825	0.358855	-1.39005	0.164515	0.997447
9930111J21Rik1	1056.33	0.286023	0.438793	0.651839	0.514505	0.997447
9930111J21Rik2	67.7619	-2.23486	0.950386	-2.35153	0.0186966	0.827404
A030009H04Rik	96.8786	0.00897347	0.611865	0.0146658	0.988299	1
A130010J15Rik	296.512	-0.0697591	0.380457	-0.183356	0.854519	0.999684
A130022J15Rik	677.624	0.0950844	0.259304	0.366691	0.713849	0.997447
A130040M12Rik	28408.8	0.147486	1.07091	0.137721	NA	NA
A130049A11Rik	31.3154	-0.173075	0.780467	-0.221758	0.824502	0.997447
A130077B15Rik	2973.59	0.584739	0.350214	1.66966	0.0949868	0.997447
A1cf	12.7771	-3.46098	2.65409	-1.30402	0.192228	0.997447
A230001M10Rik	3.10309	0.401308	1.7491	0.229437	0.81853	NA
A230020J21Rik	2.14057	2.04057	2.67115	0.763928	0.44491	NA
A230046K03Rik	1426.37	-0.162135	0.248347	-0.652857	0.513848	0.997447
A230050P20Rik	346.663	-0.152916	0.329326	-0.464329	0.642412	0.997447
A230051G13Rik	160.865	-0.990499	0.32112	-3.08451	0.00203886	0.509258
A230056J06Rik	13.2416	0.562899	1.44265	0.390183	0.696401	0.997447
A230056P14Rik	25.6076	-1.14395	0.800426	-1.42918	0.152954	0.997447
A230057D06Rik	11.0025	1.64446	1.38767	1.18506	0.235995	0.997447
A230065H16Rik	3.96556	2.05378	2.78653	0.73704	0.461098	NA
A230072C01Rik	387.64	0.371978	0.337172	1.10323	0.269926	0.997447
A230072E10Rik	33.0614	0.730631	0.725246	1.00742	0.313731	0.997447
A230073K19Rik	28.2381	-0.70074	0.994323	-0.704741	0.480972	0.997447
A230077H06Rik	23.6565	0.577657	0.690684	0.836355	0.402955	0.997447
A230108P19Rik	2.28083	2.95863	2.30319	1.28458	0.198939	NA
A2ld1	744.862	-0.0771226	0.200303	-0.385029	0.700216	0.997447
A2m	1.49394	1.4455	4.30466	0.3358	0.737022	NA
A330009N23Rik	82.2575	0.514311	0.423525	1.21436	0.224611	0.997447
A330021E22Rik	152.734	1.00095	0.7104	1.409	0.158837	0.997447
A330023F24Rik	42.7872	-1.45758	0.951276	-1.53224	0.125464	0.997447
A330032B11Rik	99.805	0.546274	0.468296	1.16651	0.243407	0.997447
A330035P11Rik	32.4821	-0.48266	0.792867	-0.608753	0.542688	0.997447
A330040F15Rik	11.6012	0.306908	1.26396	0.242815	0.808149	0.997447
A330041J22Rik	29.0827	0.223079	0.830531	0.268597	0.788239	0.997447
A330048O09Rik	2.37833	-2.49164	3.31347	-0.751972	0.452068	NA
A330049M08Rik	256.708	0.75581	0.575968	1.31224	0.189438	0.997447
A330049N07Rik	13.1953	1.02372	0.960954	1.06531	0.286734	0.997447
A330050B17Rik	194.352	0.480268	0.345874	1.38856	0.164965	0.997447
A330069E16Rik	247.239	0.313168	0.317808	0.985402	0.324427	0.997447
A330076C08Rik	1.74115	-1.38825	2.91472	-0.47629	0.633868	NA
A330076H08Rik	16.622	1.5755	0.954106	1.65129	0.0986801	0.997447
A330102I10Rik	11.1971	-1.29993	1.34904	-0.963597	0.335248	0.997447
A3galt2	6.78662	2.91039	2.0135	1.44544	0.148334	0.997447
A430005L14Rik	410.83	-0.0959303	0.264311	-0.362945	0.716646	0.997447
A430033K04Rik	254.711	0.27774	0.337559	0.822792	0.410626	0.997447
A430035B10Rik	33.5156	-0.192112	0.681726	-0.281802	0.778095	0.997447
A430071A18Rik	38.585	0.76026	0.849304	0.895157	0.370703	0.997447
A430078G23Rik	70.3105	0.478157	0.394838	1.21102	0.225888	0.997447
A430084P05Rik	25.0424	1.49417	1.57671	0.947652	0.343307	0.997447
A430088P11Rik	6.30625	0.0150832	1.31146	0.0115011	0.990824	1
A430090L17Rik	6.71401	1.00496	1.5046	0.667927	0.50418	0.997447
A430093F15Rik	1.38575	-3.46521	4.23483	-0.818265	0.413206	NA
A430105I19Rik	590.635	-0.282703	0.361008	-0.783093	0.433572	0.997447
A430107O13Rik	11.0291	0.294414	1.76899	0.16643	0.867818	0.999684
A430107P09Rik	340.682	0.775175	0.406835	1.90538	0.0567304	0.969309
A430110N23Rik	0.860395	2.75849	4.19333	0.657829	0.510648	NA
A4galt	23.8284	0.0775794	1.01846	0.0761729	0.939282	1
A530006G24Rik	1.52514	2.09158	3.19807	0.654015	0.513102	NA
A530013C23Rik	3.304	-4.12092	3.09496	-1.33149	0.183026	NA
A530032D15Rik	6.7539	0.21434	1.69158	0.126709	0.89917	1
A530046M15	2.15174	-0.276793	4.09246	-0.0676347	0.946076	NA
A530050N04Rik	13.3972	1.41518	1.01825	1.38981	0.164587	0.997447
A530054K11Rik	309.998	0.210921	0.248904	0.847398	0.396773	0.997447
A530064D06Rik	46.191	-0.829999	1.00706	-0.824182	0.409836	0.997447
A530065N20	18.8452	0.755548	0.859167	0.879396	0.379186	0.997447
A530072M11Rik	8.08315	-1.10423	1.2419	-0.889147	0.373924	0.997447
A530099J19Rik	1.13877	-2.8172	3.68402	-0.764709	0.444445	NA
A630001G21Rik	103.617	-0.161154	0.497496	-0.323931	0.74599	0.997447
A630007B06Rik	1039.74	-0.0770718	0.158037	-0.487683	0.625774	0.997447
A630010A05Rik	13.9581	1.06151	1.38734	0.765141	0.444188	0.997447
A630019I02Rik	4.23282	0.19098	2.95875	0.0645475	0.948534	NA
A630020A06	94.1934	0.00469571	0.585115	0.00802529	0.993597	1
A630023A22Rik	3.1558	4.74341	2.98396	1.58964	0.111917	NA
A630033H20Rik	12.6808	1.30642	1.76955	0.738276	0.460347	0.997447
A630055G03Rik	151.162	0.661285	0.453364	1.45862	0.144671	0.997447
A630066F11Rik	63.1497	-0.0307629	0.413166	-0.0744564	0.940647	1
A630071L07Rik	11.6642	-0.375299	2.1155	-0.177405	0.859191	0.999684
A630072M18Rik	124.552	0.184437	0.409857	0.450005	0.652707	0.997447
A630075F10Rik	157.675	0.841102	0.474417	1.77292	0.0762425	0.997447
A630077J23Rik	13.7318	0.338905	2.05627	0.164815	0.869089	0.999684
A630089N07Rik	1869.87	0.564356	0.335865	1.68031	0.0928976	0.997447
A630095N17Rik	4.42505	0.620251	2.07282	0.29923	0.764765	NA
A730008H23Rik	171.145	0.00188026	0.500776	0.00375469	0.997004	1
A730011L01Rik	479.46	0.210212	0.257653	0.815873	0.414573	0.997447
A730017L22Rik	583.228	0.614037	0.324418	1.89273	0.0583933	0.974798
A730020E08Rik	33.9139	-0.108929	0.873428	-0.124714	0.90075	1
A730020M07Rik	13.9507	1.53659	1.15314	1.33253	0.182686	0.997447
A730037C10Rik	25.2494	0.848425	0.759824	1.11661	0.264163	0.997447
A730043L09	15.0161	0.347446	0.889165	0.390755	0.695978	0.997447
A730069N07Rik	6.55058	-2.11247	3.28893	-0.642296	0.520681	0.997447
A730082K24Rik	31.6729	-0.200228	0.756857	-0.264552	0.791355	0.997447
A730085A09Rik	4.8806	0.337369	1.74266	0.193594	0.846494	NA
A730085K08Rik	1.2636	0	4.32799	0	1	NA
A730090H04Rik	6.17009	-0.679689	1.66905	-0.407231	0.683839	0.997447
A730090N16Rik	3.34941	0.00229503	2.92245	0.000785309	0.999373	NA
A730098P11Rik	241.51	0.158623	0.267854	0.592201	0.553716	0.997447
A830007P12Rik	2068.14	-0.201787	0.213242	-0.946286	0.344003	0.997447
A830010M20Rik	41.3121	0.0846427	0.727075	0.116415	0.907323	1
A830018L16Rik	27.2337	0.27663	0.884322	0.312816	0.754421	0.997447
A830052D11Rik	93.8677	0.656199	0.522427	1.25606	0.209095	0.997447
A830060N17	21.2617	-0.548131	1.42589	-0.384412	0.700673	0.997447
A830080D01Rik	744.462	-0.237309	0.205363	-1.15556	0.247862	0.997447
A830082K12Rik	50.7528	1.12314	0.527569	2.12889	0.0332632	0.891969
A830082N09Rik	42.9869	0.3991	0.679572	0.587281	0.557015	0.997447
A830093I24Rik	11.7506	0.489169	1.60094	0.305551	0.759947	0.997447
A930001A20Rik	3.69731	3.89565	3.17668	1.22633	0.220076	NA
A930001C03Rik	35.1703	-0.170735	0.613662	-0.278224	0.78084	0.997447
A930001N09Rik	1719.07	0.225156	0.240047	0.937967	0.348261	0.997447
A930003A15Rik	8.27039	0.318896	1.58872	0.200725	0.840914	0.998189
A930004D18Rik	123.485	-0.721292	0.505813	-1.42601	0.153867	0.997447
A930005H10Rik	270.205	0.543594	0.385603	1.40973	0.158621	0.997447
A930005I04Rik	6.73456	-1.39033	1.77421	-0.783635	0.433254	0.997447
A930007I19Rik	17.5758	-0.127405	0.748063	-0.170313	0.864764	0.999684
A930011O12Rik	1.25711	2.79811	3.39621	0.823894	0.41	NA
A930012L18Rik	9.29318	0.746924	1.36055	0.548987	0.583015	0.997447
A930013F10Rik	34.7529	0.16237	0.61886	0.262369	0.793037	0.997447
A930015D03Rik	63.3532	-0.539993	0.921858	-0.585767	0.558032	0.997447
A930017M01Rik	2.02437	0	4.32799	0	1	NA
A930018P22Rik	2.55552	-2.08042	3.39968	-0.611946	0.540574	NA
A930019D19Rik	11.2409	1.57989	1.18187	1.33677	0.181297	0.997447
A930024E05Rik	19.2188	1.12309	0.91488	1.22758	0.219605	0.997447
A930038C07Rik	4737.78	-0.349484	0.370929	-0.942185	0.346098	0.997447
A930041C12Rik	1.34635	0.946941	4.07924	0.232137	0.816432	NA
AA388235	89.9127	0.69425	0.606344	1.14498	0.252218	0.997447
AA415398	41.8307	0.249115	0.565264	0.440706	0.659426	0.997447
AA465934	349.741	0.133128	0.28448	0.467971	0.639805	0.997447
AA467197	426.754	0.521204	0.720286	0.723607	0.469307	0.997447
AA474331	18.4889	-0.934796	0.882408	-1.05937	0.289432	0.997447
AA536875	7.47575	0.570324	1.20172	0.474592	0.635078	0.997447
AA543186	32.0954	-0.0440278	0.719626	-0.0611815	0.951215	1
AA792892	3.23818	0.255363	2.03712	0.125355	0.900242	NA
AA960436	652.286	0.145621	0.223467	0.651644	0.514631	0.997447
AA986860	4686.74	0.0889323	0.259498	0.34271	0.731817	0.997447
AA987161	404.669	-0.426318	0.402339	-1.0596	0.289327	0.997447
AB124611	17.9279	0.703876	1.1941	0.58946	0.555553	0.997447
AF251705	67.1391	2.33629	1.47827	1.58042	0.114011	0.997447
AF357355	3.64046	-0.575419	1.74468	-0.329813	0.741542	NA
AF357425	4.36868	0.343604	1.43864	0.23884	0.81123	NA
AF357426	1.25209	1.85375	4.0115	0.462108	0.644004	NA
AF366264	7.06497	0.354823	1.798	0.197343	0.843559	0.9986
AI118078	21.6033	0.655149	1.72345	0.380138	0.703843	0.997447
AI182371	33.9618	0.674464	0.766803	0.879578	0.379088	0.997447
AI197445	6.45685	0.941554	1.37684	0.68385	0.49407	0.997447
AI314180	1354.92	0.128374	0.201289	0.637758	0.523631	0.997447
AI314976	743.894	0.094452	0.251703	0.375252	0.707473	0.997447
AI316807	508.657	0.226551	0.236616	0.95746	0.338335	0.997447
AI317395	41.6666	2.56614	0.858584	2.98881	0.00280064	0.534153
AI413582	821.973	0.0431199	0.235393	0.183183	0.854655	0.999684
AI414108	28.4864	-0.430425	0.926624	-0.464509	0.642283	0.997447
AI427809	14.9595	-0.0576302	0.982181	-0.0586757	0.95321	1
AI428936	155.559	-0.780066	0.3651	-2.13658	0.0326321	0.887862
AI429214	208.949	-0.535037	0.371289	-1.44103	0.149577	0.997447
AI450353	31.6261	-0.0245145	0.756169	-0.0324194	0.974138	1
AI462493	660.588	-0.130141	0.266844	-0.487706	0.625758	0.997447
AI463170	52.7596	0.218576	0.720895	0.3032	0.761737	0.997447
AI464131	345.834	-0.151956	0.31169	-0.487524	0.625887	0.997447
AI467606	661.127	0.155419	0.250837	0.619601	0.535521	0.997447
AI480653	393.437	-0.28643	0.223256	-1.28297	0.199503	0.997447
AI504432	15.4477	1.67757	1.98885	0.84349	0.398954	0.997447
AI506816	72.382	0.561106	0.54156	1.03609	0.300159	0.997447
AI507597	27.4053	-0.473746	0.709759	-0.667474	0.504469	0.997447
AI597468	694.33	-0.143594	0.283314	-0.506836	0.61227	0.997447
AI597479	555.256	-0.103514	0.303784	-0.34075	0.733292	0.997447
AI607873	58.4834	1.82471	1.3627	1.33904	0.180557	0.997447
AI646023	6.90778	1.24014	1.33989	0.925558	0.354675	0.997447
AI661453	281.61	0.533354	0.387233	1.37734	0.168406	0.997447
AI662270	19.5444	1.02718	0.996547	1.03074	0.302661	0.997447
AI747448	4.29056	0	4.32799	0	1	NA
AI836003	10.5908	-0.305289	1.21781	-0.250687	0.802056	0.997447
AI837181	446.974	-0.307778	0.289715	-1.06235	0.288078	0.997447
AI846148	383.017	0.262423	0.32791	0.800292	0.423542	0.997447
AI847159	8.84807	0.419853	1.73435	0.242081	0.808717	0.997447
AI848100	1160.11	-0.0482093	0.146372	-0.329361	0.741883	0.997447
AI848285	2.6804	-1.71085	3.03305	-0.564068	0.572708	NA
AI987944	502.563	0.243945	0.278977	0.874426	0.381886	0.997447
AK010878	406.295	-0.169117	0.30346	-0.557298	0.577324	0.997447
AK129341	89.7196	0.645367	0.659649	0.978349	0.327902	0.997447
AU015836	1.48976	-3.86407	4.22791	-0.913944	0.360746	NA
AU018091	32.1101	-0.151061	1.49651	-0.100943	0.919596	1
AU019823	415	0.429398	0.241683	1.7767	0.0756178	0.997447
AU019990	11.3058	1.06315	1.15728	0.918664	0.358272	0.997447
AU021034	145.103	0.370974	0.64974	0.570958	0.568028	0.997447
AU021092	2952.33	-0.328719	0.386227	-0.851103	0.394712	0.997447
AU022252	205.175	-0.107139	0.261022	-0.41046	0.681468	0.997447
AU022751	1.09758	0	4.32799	0	1	NA
AU022754	47.4024	0.833701	0.72156	1.15541	0.247921	0.997447
AU022793	11.1794	2.11237	1.67634	1.26011	0.20763	0.997447
AU023762	37.6352	0.640938	0.886793	0.722759	0.469828	0.997447
AU023871	128.521	0.830004	0.425124	1.95238	0.0508929	0.956384
AU040320	1632.42	-0.227844	0.152323	-1.49579	0.134709	0.997447
AU040972	2104.96	0.555862	0.433982	1.28084	0.200249	0.997447
AU041133	235.617	0.372621	0.374088	0.996079	0.319212	0.997447
AV039307	4.68577	-2.37397	1.62031	-1.46513	0.142884	NA
AV051173	49.874	-0.250896	0.587376	-0.427146	0.669273	0.997447
AW011738	21.9199	0.701484	0.842554	0.832569	0.405088	0.997447
AW046200	11.8925	0.895991	0.862052	1.03937	0.298633	0.997447
AW112010	1476.7	0.851173	0.264719	3.21538	0.00130271	0.411154
AW146020	147.317	-0.166341	0.513132	-0.324168	0.745811	0.997447
AW146154	291.238	-0.142136	0.252572	-0.562754	0.573602	0.997447
AW209491	594.107	-0.406532	0.27928	-1.45564	0.145492	0.997447
AW549542	9.78332	0.685513	1.20323	0.569725	0.568864	0.997447
AW549877	1307.29	-0.525048	0.191662	-2.73945	0.00615423	0.624091
AW551984	1.73336	-0.610767	4.32799	-0.14112	0.887775	NA
AW554918	140.211	0.219029	0.477064	0.459119	0.646149	0.997447
AW555464	3824.41	-0.183421	0.156992	-1.16835	0.242667	0.997447
AY074887	51.7002	0.275473	0.484293	0.568814	0.569482	0.997447
AY512931	44.4793	0.0470222	0.703481	0.0668421	0.946707	1
Aaas	547.554	0.315235	0.284563	1.10779	0.267954	0.997447
Aacs	739.967	-0.122595	0.212099	-0.578007	0.563259	0.997447
Aadac	18.1681	-0.686937	2.57907	-0.266351	NA	NA
Aagab	567.038	0.401249	0.23676	1.69475	0.0901224	0.997447
Aak1	833.43	-0.0626757	0.196107	-0.3196	0.749271	0.997447
Aamp	6293.04	-0.17991	0.149939	-1.19989	0.230183	0.997447
Aanat	4.11052	-1.10278	1.59885	-0.689734	0.490362	NA
Aard	12.2399	1.94888	2.0231	0.963311	0.335391	0.997447
Aars	2740.11	-0.41147	0.210287	-1.95671	0.050382	0.956384
Aars2	304.866	0.548162	0.406354	1.34898	0.177344	0.997447
Aarsd1	509.563	0.116513	0.311089	0.374534	0.708007	0.997447
Aasdh	246.88	0.443383	0.466119	0.951223	0.341491	0.997447
Aasdhppt	735.827	0.121523	0.233667	0.520069	0.603015	0.997447
Aass	419.779	-0.575683	0.711728	-0.808852	0.4186	0.997447
Aatf	697.242	-0.19713	0.237519	-0.829953	0.406565	0.997447
Aatk	31.2716	0.916398	1.63737	0.559677	0.575699	0.997447
Abat	25.7755	-0.471277	1.7717	-0.266002	0.790238	0.997447
Abca1	742.815	0.324326	0.286826	1.13074	0.258164	0.997447
Abca12	2.51438	1.56402	3.57873	0.437032	0.662088	NA
Abca13	1.9717	3.53043	4.1471	0.851301	0.394602	NA
Abca14	12.1992	0.112021	1.98493	0.0564356	0.954995	1
Abca17	26.8949	0.840698	1.12119	0.749824	0.453361	0.997447
Abca2	736.543	0.0912368	0.186417	0.489423	0.624542	0.997447
Abca3	11011.3	-0.324528	0.295772	-1.09722	0.272544	0.997447
Abca4	140.581	-0.0843497	0.46647	-0.180826	0.856504	0.999684
Abca5	1360.7	-0.288513	0.292547	-0.986212	0.324029	0.997447
Abca6	10.5124	1.16862	1.14736	1.01853	0.308427	0.997447
Abca7	1192.73	-0.363127	0.289879	-1.25268	0.210321	0.997447
Abca8b	36.2987	0.228325	0.734109	0.311023	0.755783	0.997447
Abca9	6.48038	-2.57191	2.80266	-0.917669	0.358792	0.997447
Abcb10	292.229	-0.481327	0.241615	-1.99212	0.0463581	0.939971
Abcb1a	375.072	-0.210128	0.682619	-0.307826	0.758215	0.997447
Abcb1b	340.002	0.4252	1.15655	0.367645	0.713138	0.997447
Abcb4	2.22904	1.52583	2.46426	0.619185	0.535794	NA
Abcb6	408.87	0.276465	0.320118	0.863633	0.38779	0.997447
Abcb7	473.76	0.0530136	0.221163	0.239703	0.81056	0.997447
Abcb8	1025.86	-0.0164202	0.242532	-0.0677033	0.946022	1
Abcb9	82.6597	-0.533011	0.461777	-1.15426	0.248394	0.997447
Abcc1	845.537	0.541853	0.398854	1.35853	0.174297	0.997447
Abcc10	256.911	-0.448525	0.433692	-1.0342	0.301042	0.997447
Abcc2	3.21665	-3.16441	3.57485	-0.885186	0.376056	NA
Abcc3	2655.96	0.200436	0.292342	0.685621	0.492952	0.997447
Abcc4	1183.8	0.348196	0.201538	1.72769	0.0840435	0.997447
Abcc5	2679.03	-0.356194	0.262023	-1.3594	0.17402	0.997447
Abcc8	179.218	0.19519	0.849385	0.229801	0.818246	0.997447
Abcc9	2.7112	-1.17934	2.67467	-0.44093	0.659264	NA
Abcd1	710.122	-0.314442	0.246147	-1.27746	0.20144	0.997447
Abcd2	72.753	2.31016	0.871419	2.65103	0.00802471	0.687871
Abcd3	4105.28	-0.094594	0.153754	-0.615229	0.538404	0.997447
Abcd4	387.309	-0.113615	0.297009	-0.382531	0.702068	0.997447
Abce1	2535.42	-0.0782795	0.125301	-0.624734	0.532146	0.997447
Abcf1	1491.34	0.0710352	0.146489	0.48492	0.627733	0.997447
Abcf2	2071.45	-0.0932853	0.152205	-0.612895	0.539946	0.997447
Abcf3	988.648	-0.142275	0.205103	-0.693674	0.487887	0.997447
Abcg1	373.851	0.68039	0.713393	0.953738	0.340216	0.997447
Abcg2	212.434	0.345758	0.426589	0.810519	0.417642	0.997447
Abcg3	3.13081	-1.81636	4.04398	-0.44915	0.653323	NA
Abcg4	3.80519	-3.73754	4.2299	-0.883599	0.376913	NA
Abcg5	20.5271	-0.93438	1.20194	-0.777395	0.436926	0.997447
Abcg8	1.43753	-3.28907	4.10869	-0.800515	0.423413	NA
Abhd1	282.91	0.133438	0.343574	0.388382	0.697733	0.997447
Abhd10	250.814	-0.0362627	0.332433	-0.109083	0.913137	1
Abhd11	1720.17	0.0789622	0.146672	0.538358	0.59033	0.997447
Abhd12	1314.14	-0.409956	0.292807	-1.40009	0.161486	0.997447
Abhd12b	96.4326	0.126639	0.892417	0.141906	0.887154	1
Abhd13	1385.95	0.0689505	0.203357	0.339062	0.734563	0.997447
Abhd14a	174.262	-0.256099	0.469718	-0.545218	0.585603	0.997447
Abhd14b	327.209	-1.85368	0.845169	-2.19327	0.0282881	0.87427
Abhd15	33.3932	1.49263	1.26788	1.17726	0.239091	0.997447
Abhd16a	2433.55	-0.137603	0.170317	-0.807925	0.419134	0.997447
Abhd16b	11.7716	0.790608	1.11581	0.708553	0.478602	0.997447
Abhd2	2987.81	-0.222784	0.216952	-1.02688	0.304476	0.997447
Abhd3	167.55	0.68383	0.779131	0.877682	0.380116	0.997447
Abhd4	3750.88	-0.204602	0.202026	-1.01275	0.311179	0.997447
Abhd5	977.898	-0.481247	0.298924	-1.60993	0.107413	0.997447
Abhd6	499.865	0.0781584	0.206983	0.377607	0.705722	0.997447
Abhd8	359.015	-0.355616	0.298577	-1.19104	0.23364	0.997447
Abi1	2257.72	-0.270571	0.191775	-1.41088	0.158281	0.997447
Abi2	533.107	0.298955	0.192906	1.54975	0.121202	0.997447
Abi3	19.0201	-0.898683	1.20993	-0.742757	0.457629	0.997447
Abi3bp	8.27979	-0.984439	1.4056	-0.70037	0.483697	0.997447
Abl1	967.573	-0.0889428	0.275561	-0.322771	0.746869	0.997447
Abl2	515.777	0.437528	0.235	1.86182	0.0626281	0.985802
Ablim1	619.69	1.3557	0.623969	2.1727	0.0298032	0.87427
Ablim2	20.8666	0.468342	1.08894	0.430088	0.667132	0.997447
Ablim3	643.467	0.828993	0.427793	1.93783	0.0526434	0.956384
Abo	1.98679	-2.36148	4.26753	-0.553359	0.580018	NA
Abp1	113.728	0.547534	0.811378	0.67482	0.49979	0.997447
Abr	1518.83	0.0106058	0.199967	0.0530376	0.957702	1
Abra	1.20987	3.8885	4.1122	0.945601	0.344352	NA
Abt1	1041.93	0.284808	0.213827	1.33195	0.182875	0.997447
Abtb1	874.124	-0.243277	0.242405	-1.0036	0.315574	0.997447
Abtb2	214.496	-0.561456	0.471452	-1.19091	0.23369	0.997447
Acaa1a	3147.4	-0.211508	0.198906	-1.06336	0.28762	0.997447
Acaa1b	15.7486	0.547526	2.47555	0.221173	0.824957	0.997447
Acaa2	4421.1	-0.188388	0.167598	-1.12405	0.260993	0.997447
Acaca	821.02	-0.0115097	0.392673	-0.0293112	0.976616	1
Acacb	194.965	-0.509316	0.429514	-1.1858	0.235703	0.997447
Acad10	354.871	-0.263878	0.334815	-0.788128	0.430622	0.997447
Acad11	483.663	-0.234807	0.303246	-0.77431	0.438748	0.997447
Acad12	154.776	-1.24235	0.452315	-2.74664	0.0060209	0.624091
Acad8	593.159	-0.205494	0.195015	-1.05374	0.292004	0.997447
Acad9	1653.85	0.263903	0.153005	1.72479	0.0845648	0.997447
Acadl	4448.54	-0.172752	0.242853	-0.711342	0.476872	0.997447
Acadm	1968.43	-0.0338183	0.207783	-0.162757	0.870709	0.999684
Acads	662.662	-0.16922	0.227375	-0.744235	0.456734	0.997447
Acadsb	1296.33	-0.0726185	0.234766	-0.309322	0.757076	0.997447
Acadvl	2109.18	-0.0691616	0.163162	-0.423884	0.67165	0.997447
Acan	31.627	0.693161	1.61498	0.429206	0.667773	0.997447
Acap1	17.2198	-0.619974	1.41426	-0.438374	0.661115	0.997447
Acap2	923.083	-0.169367	0.180137	-0.94021	0.34711	0.997447
Acap3	346.649	-0.358216	0.291855	-1.22738	0.219681	0.997447
Acat1	1863.19	-0.138853	0.224933	-0.617307	0.537032	0.997447
Acat2	743.146	-0.0536592	0.243393	-0.220463	0.825511	0.997447
Acat3	44.1775	0.424239	0.888391	0.477536	0.63298	0.997447
Acbd3	1815.4	-0.0701358	0.214174	-0.327472	0.743311	0.997447
Acbd4	765.346	-0.0117621	0.252832	-0.0465215	0.962895	1
Acbd5	1355.38	-0.180404	0.221207	-0.815542	0.414762	0.997447
Acbd6	339.391	0.229819	0.230352	0.997689	0.31843	0.997447
Acbd7	6.71316	-1.26776	2.55749	-0.495704	0.620104	0.997447
Accn1	3.56018	1.24046	2.72699	0.454882	0.649194	NA
Accn2	38.8036	1.38013	0.606044	2.27728	0.0227693	0.849346
Accn3	3.14002	-0.268284	2.6258	-0.102172	0.91862	NA
Accn5	4.44846	-0.323167	3.52025	-0.0918022	0.926855	NA
Accs	80.0526	0.896833	0.64218	1.39654	0.162551	0.997447
Acd	605.615	0.103974	0.258054	0.402915	0.68701	0.997447
Ace	444.102	-0.132019	0.51607	-0.255816	0.798093	0.997447
Ace2	430.154	-0.142073	0.448194	-0.316991	0.75125	0.997447
Acer1	3.97344	0.797477	1.67359	0.476505	0.633715	NA
Acer2	129.417	-0.410161	0.606349	-0.676444	0.498759	0.997447
Acer3	1956.95	0.017212	0.217249	0.0792268	0.936852	1
Ache	46.4851	-0.262282	0.997913	-0.26283	0.792681	0.997447
Acin1	1053.06	0.164888	0.204059	0.808041	0.419067	0.997447
Acly	8862.06	-0.297707	0.214422	-1.38842	0.165011	0.997447
Acmsd	34.8973	0.102331	0.710992	0.143928	0.885558	1
Acn9	119.6	-0.272944	0.398046	-0.68571	0.492896	0.997447
Acnat1	557.041	0.269806	0.289518	0.931914	0.351381	0.997447
Acnat2	1.15303	-3.35152	4.23718	-0.790979	0.428957	NA
Aco1	4460.91	-0.151154	0.224427	-0.673511	0.500622	0.997447
Aco2	4482.51	-0.187948	0.125835	-1.49361	0.135277	0.997447
Acot1	441.503	0.3704	0.399305	0.927612	0.353609	0.997447
Acot10	1.06242	0.299009	4.2662	0.070088	0.944124	NA
Acot11	284.345	0.0979236	0.483621	0.20248	0.839541	0.998189
Acot12	2.97339	-4.96826	4.21624	-1.17836	0.238652	NA
Acot13	989.065	-0.0678803	0.204638	-0.331709	0.740109	0.997447
Acot2	403.578	-0.568055	0.367551	-1.54551	0.122222	0.997447
Acot3	4.94042	2.98371	2.12776	1.40228	0.160833	NA
Acot4	11.0769	7.25927	2.26765	3.20123	0.00136842	0.411154
Acot6	10.8523	-0.35102	1.45692	-0.240933	0.809607	0.997447
Acot7	1652.91	-0.00886601	0.24036	-0.0368864	0.970576	1
Acot8	346.125	-0.258494	0.225618	-1.14572	0.251912	0.997447
Acot9	1935.71	-0.119708	0.200919	-0.595803	0.551307	0.997447
Acox1	3144.04	0.105721	0.179766	0.588102	0.556464	0.997447
Acox2	355.777	0.17895	0.346848	0.515933	0.605901	0.997447
Acox3	765.477	-0.101559	0.215999	-0.470185	0.638223	0.997447
Acoxl	210.053	0.495729	0.737551	0.672128	0.501502	0.997447
Acp1	2339.4	0.0464566	0.157362	0.295221	0.767825	0.997447
Acp2	1359.52	-0.49001	0.188147	-2.6044	0.00920348	0.708141
Acp5	749.68	0.806217	0.343197	2.34914	0.018817	0.827404
Acp6	781.611	-0.292777	0.272204	-1.07558	0.282114	0.997447
Acpl2	318.328	0.219338	0.46741	0.469263	0.638882	0.997447
Acpp	50.4131	1.66974	0.937472	1.78111	0.0748944	0.997447
Acpt	2.1486	0.614401	2.61211	0.235213	0.814044	NA
Acr	1.07803	0	4.32799	0	1	NA
Acrbp	88.4003	0.262293	0.554181	0.473299	0.636	0.997447
Acrv1	2.18904	2.65319	4.00294	0.662812	0.507451	NA
Acsbg1	342.274	0.692258	0.494022	1.40127	0.161133	0.997447
Acsf2	250.819	-0.188154	0.267478	-0.70344	0.481782	0.997447
Acsf3	301.963	0.074808	0.311105	0.240459	0.809974	0.997447
Acsl1	840.125	0.217353	0.442491	0.491204	0.623282	0.997447
Acsl3	2287.16	-0.247127	0.244465	-1.01089	0.312069	0.997447
Acsl4	6476.14	-0.286248	0.13425	-2.13221	0.0329899	0.891969
Acsl5	7962.18	-0.222479	0.204845	-1.08608	0.277443	0.997447
Acsl6	17.8128	-2.56049	1.7521	-1.46138	0.143911	0.997447
Acsm1	8.56007	1.45115	1.68257	0.86246	0.388435	0.997447
Acsm2	46.0144	0.607212	0.581336	1.04451	0.296249	0.997447
Acsm3	16.4725	1.5921	2.13448	0.745896	0.45573	0.997447
Acss1	1216.56	-0.137913	0.259711	-0.531026	0.595401	0.997447
Acss2	881.213	-0.729122	0.843293	-0.864613	0.387251	0.997447
Acss3	105.037	-0.945062	0.696788	-1.35631	0.175	0.997447
Acta1	13.1012	-1.00011	1.05649	-0.94664	0.343822	0.997447
Acta2	1432.46	-0.747435	0.445633	-1.67724	0.0934952	0.997447
Actb	179063	-0.106419	0.151835	-0.700885	0.483375	0.997447
Actbl2	1.41272	-0.917542	2.98051	-0.307848	0.758198	NA
Actg1	75784	-0.149086	0.147379	-1.01158	0.31174	0.997447
Actg2	1.08887	-1.85648	4.21699	-0.440238	0.659765	NA
Actl6a	1569.97	-0.0187279	0.149211	-0.125513	0.900118	1
Actn1	1509.32	0.0492969	0.185486	0.265771	0.790415	0.997447
Actn2	7.38521	1.21442	1.56869	0.774158	0.438837	0.997447
Actn3	2.12948	-4.48337	4.2203	-1.06233	0.288084	NA
Actn4	15345.8	-0.233288	0.145009	-1.60878	0.107664	0.997447
Actr10	2513.2	0.0517803	0.1546	0.334931	0.737677	0.997447
Actr1a	1988.98	0.195495	0.117873	1.65852	0.0972125	0.997447
Actr1b	2538.97	-0.237368	0.137635	-1.72462	0.0845958	0.997447
Actr2	2963	0.0258929	0.214304	0.120823	0.903831	1
Actr3	9554.33	-0.286501	0.175891	-1.62886	0.103343	0.997447
Actr3b	2.33553	-4.02554	4.2256	-0.952655	0.340765	NA
Actr5	304.286	0.3737	0.271911	1.37434	0.169335	0.997447
Actr6	266.634	-0.652746	0.372604	-1.75185	0.0797998	0.997447
Actr8	1118.9	0.0907908	0.22216	0.408673	0.68278	0.997447
Acvr1	294.685	0.275561	0.312322	0.882298	0.377616	0.997447
Acvr1b	126.767	0.525064	0.414246	1.26752	0.204971	0.997447
Acvr1c	62.7646	-0.575596	1.23453	-0.466246	0.641039	0.997447
Acvr2a	701.48	-0.0734171	0.206526	-0.355486	0.722226	0.997447
Acvr2b	122.429	0.0477943	0.454949	0.105054	0.916333	1
Acvrl1	69.6237	1.27064	1.0216	1.24377	0.213583	0.997447
Acy1	289.831	-0.00785376	0.425764	-0.0184463	0.985283	1
Acy3	247.71	-0.27497	0.425095	-0.646843	0.517734	0.997447
Acyp1	185.732	-0.274628	0.336713	-0.815614	0.414721	0.997447
Acyp2	123.089	-0.281923	0.413993	-0.680986	0.49588	0.997447
Ada	18.5332	1.06176	1.22864	0.864178	0.38749	0.997447
Adal	294.72	0.107881	0.273998	0.393728	0.693782	0.997447
Adam10	4173.82	-0.0625688	0.279874	-0.22356	0.823099	0.997447
Adam11	30.7894	0.177417	1.2414	0.142917	0.886356	1
Adam12	238.673	0.169219	0.464282	0.364474	0.715504	0.997447
Adam15	853.006	-0.015054	0.276832	-0.0543797	0.956633	1
Adam17	2201.1	-0.125298	0.338762	-0.36987	0.71148	0.997447
Adam19	820.375	-0.143175	0.525225	-0.272597	0.785163	0.997447
Adam1a	34.9622	0.152539	1.17379	0.129954	0.896603	1
Adam1b	16.7628	-0.045516	1.19428	-0.0381116	0.969599	1
Adam21	2.7794	-4.46649	3.68117	-1.21333	0.225002	NA
Adam22	398.882	0.0295174	0.466062	0.0633336	0.949501	1
Adam23	2.04547	2.75848	4.19333	0.657826	0.51065	NA
Adam28	1474.52	1.87913	0.861871	2.1803	0.0292354	0.87427
Adam3	1.45501	0	4.32799	0	1	NA
Adam30	5.78635	1.52214	2.67478	0.569071	0.569308	NA
Adam32	3.70048	-4.40065	2.38682	-1.84373	0.0652219	NA
Adam33	7.39691	1.69108	2.9377	0.575647	0.564854	0.997447
Adam4	10.7873	-0.327417	1.33975	-0.244387	0.806931	0.997447
Adam5	6.70135	-4.6922	3.72187	-1.26071	0.207413	0.997447
Adam7	5.97138	0.864749	1.89501	0.456331	0.648152	0.997447
Adam8	524.144	0.900921	0.43334	2.07902	0.0376157	0.912372
Adam9	5446.34	-0.167836	0.202805	-0.827573	0.407912	0.997447
Adamdec1	22.7901	2.59937	1.32779	1.95766	0.0502701	0.956384
Adamts1	1238.38	-0.346793	0.498838	-0.695202	0.486929	0.997447
Adamts10	683.872	0.0817789	0.275998	0.296303	0.766999	0.997447
Adamts13	1.15931	-0.300856	4.23206	-0.0710897	0.943326	NA
Adamts14	1.31152	0	4.32799	0	1	NA
Adamts15	57.7763	1.36743	1.15135	1.18767	0.234963	0.997447
Adamts17	16.4037	-0.00645674	1.2135	-0.00532074	0.995755	1
Adamts18	42.7325	0.415444	1.10221	0.376918	0.706234	0.997447
Adamts2	7.11656	0.140691	2.16441	0.0650023	0.948172	1
Adamts20	3.15388	-3.51938	4.23378	-0.831262	0.405826	NA
Adamts3	10.974	-1.44346	1.67961	-0.8594	0.39012	0.997447
Adamts4	20.0288	-0.0332973	1.46167	-0.0227802	0.981826	1
Adamts5	24.4118	0.647578	1.18875	0.544753	0.585923	0.997447
Adamts6	142.38	0.380937	0.744602	0.511598	0.608932	0.997447
Adamts7	19.187	1.21025	1.21197	0.998579	0.317999	0.997447
Adamts8	6.80256	2.36992	2.34424	1.01096	0.312036	0.997447
Adamts9	312.023	0.269355	0.623093	0.432287	0.665533	0.997447
Adamtsl1	20.9978	0.223367	1.7859	0.125073	0.900466	1
Adamtsl2	5.63092	0.969099	3.24761	0.298404	0.765395	NA
Adamtsl3	55.4702	-0.106323	1.1487	-0.0925598	0.926253	1
Adamtsl4	1356.87	0.372614	0.271358	1.37314	0.169708	0.997447
Adamtsl5	358.132	0.207586	0.271928	0.763387	0.445233	0.997447
Adap1	297.234	0.714423	0.426142	1.67649	0.0936421	0.997447
Adap2	28.1138	0.0594645	1.03495	0.0574563	0.954182	1
Adar	1059.01	-0.00820882	0.256014	-0.032064	0.974421	1
Adarb1	35.4288	2.04755	0.970436	2.10993	0.0348642	0.900238
Adarb2	5.85347	0.918569	2.55156	0.360002	0.718845	NA
Adat1	142.405	0.137499	0.445668	0.308525	0.757683	0.997447
Adat2	108.732	0.00661739	0.531502	0.0124503	0.990066	1
Adat3	150.103	0.0170001	0.313954	0.0541485	0.956817	1
Adc	400.962	-0.164992	0.639458	-0.258018	0.796393	0.997447
Adck1	349.806	-0.332226	0.355851	-0.933609	0.350506	0.997447
Adck2	446.867	-0.104709	0.246483	-0.424812	0.670973	0.997447
Adck3	365.655	-0.154854	0.383913	-0.403358	0.686685	0.997447
Adck4	1431.81	-0.0945525	0.225706	-0.41892	0.675275	0.997447
Adck5	624.982	-0.23756	0.228217	-1.04094	0.297905	0.997447
Adcy1	15.7608	1.4751	2.39393	0.616182	0.537774	0.997447
Adcy10	1.7806	0.0483006	3.09551	0.0156035	0.987551	NA
Adcy2	13.7825	-0.302009	1.27692	-0.236514	0.813034	0.997447
Adcy3	1508.73	0.518718	0.242497	2.13907	0.0324303	0.886777
Adcy4	13.4331	0.374281	1.82494	0.205092	0.8375	0.998189
Adcy5	8.61206	-2.36802	1.87377	-1.26377	0.206312	0.997447
Adcy6	635.776	-0.115883	0.327774	-0.353547	0.723678	0.997447
Adcy7	1074.92	0.197389	0.529272	0.372945	0.70919	0.997447
Adcy8	14.9312	-0.897299	1.83597	-0.488733	0.625031	0.997447
Adcy9	110.133	-0.0998582	0.539623	-0.185052	0.853189	0.999684
Adcyap1	415.298	0.0946113	0.448976	0.210727	0.8331	0.997839
Adcyap1r1	22.8969	0.833847	1.7366	0.480161	0.631113	0.997447
Add1	4051.5	-0.304949	0.180162	-1.69264	0.0905245	0.997447
Add2	43.3146	-0.448923	1.34035	-0.334931	0.737677	0.997447
Add3	521.006	0.497574	0.487268	1.02115	0.307183	0.997447
Adh1	136.658	-10.1712	2.61423	-3.89068	NA	NA
Adh5	2246.96	-0.211459	0.155298	-1.36164	0.173312	0.997447
Adh7	76.64	-1.12438	0.764453	-1.47083	0.141336	0.997447
Adhfe1	16.5249	-1.64641	1.48783	-1.10659	0.268473	0.997447
Adi1	4085.69	-0.195882	0.157803	-1.24131	0.214493	0.997447
Adig	21.3267	0.858087	0.693089	1.23806	0.215694	0.997447
Adipor1	6568.51	-0.294939	0.126184	-2.33737	0.0194201	0.832343
Adipor2	1607.13	-0.0275244	0.205388	-0.134012	0.893393	1
Adk	3831.39	-0.351384	0.212694	-1.65207	0.0985212	0.997447
Adm	121.006	1.01912	0.869876	1.17157	0.24137	0.997447
Adm2	55.8462	-0.654414	0.644497	-1.01539	0.309922	0.997447
Adnp	1338.09	0.325708	0.317126	1.02706	0.304392	0.997447
Adnp2	413.284	0.263677	0.432281	0.609966	0.541885	0.997447
Ado	832.734	0.090169	0.235221	0.383338	0.701469	0.997447
Adora1	683.252	0.0294678	0.272978	0.107949	0.914036	1
Adora2a	3.08448	0.759342	3.46484	0.219157	0.826528	NA
Adora2b	241.395	0.168492	0.399353	0.421913	0.673088	0.997447
Adora3	72.7601	0.0985576	0.508942	0.193652	0.846449	0.99863
Adpgk	352.867	-0.265689	0.291009	-0.912992	0.361247	0.997447
Adprh	586.654	-0.305174	0.193892	-1.57394	0.115501	0.997447
Adprhl1	9.24028	2.48527	2.84906	0.872311	0.383039	0.997447
Adprhl2	675.849	-0.0993718	0.202747	-0.490127	0.624044	0.997447
Adra1b	9.53965	2.30136	1.50842	1.52568	0.127089	0.997447
Adra2a	18.5692	0.973868	1.26006	0.772876	0.439596	0.997447
Adra2b	16.8157	-0.181531	0.831473	-0.218324	0.827177	0.997447
Adra2c	7.73001	0	2.82469	0	1	1
Adrb1	160.409	0.276336	0.424763	0.650565	0.515327	0.997447
Adrb2	1072.46	0.551808	0.395478	1.39529	0.162928	0.997447
Adrb3	2.09065	2.80415	3.74734	0.748305	0.454276	NA
Adrbk1	674.268	0.649534	0.299441	2.16916	0.0300708	0.87427
Adrbk2	1647.73	0.200542	0.267728	0.749051	0.453826	0.997447
Adrm1	2806.24	-0.01935	0.14416	-0.134225	0.893224	1
Adsl	1694.55	-0.0402935	0.190769	-0.211216	0.832719	0.997825
Adss	3889.44	-0.0644953	0.167955	-0.384004	0.700976	0.997447
Adssl1	3793.16	-0.242343	0.321527	-0.753726	0.451013	0.997447
Aebp1	495.484	-0.306322	0.418395	-0.732134	0.464087	0.997447
Aebp2	1314.32	-0.111536	0.161926	-0.68881	0.490943	0.997447
Aen	742.606	-0.194137	0.21085	-0.920737	0.357188	0.997447
Aes	5492.84	-0.298391	0.103455	-2.88427	0.00392321	0.575466
Afap1	449.439	-0.397437	0.351291	-1.13136	0.257903	0.997447
Afap1l1	1724.5	0.337127	0.268934	1.25357	0.209999	0.997447
Afap1l2	27.79	-0.937402	1.04754	-0.894857	0.370864	0.997447
Aff1	1695.15	-0.307342	0.193346	-1.58959	0.111927	0.997447
Aff2	16.6507	-3.28744	1.45252	-2.26326	0.0236196	0.850321
Aff3	2.73296	0.502576	2.20672	0.227748	0.819842	NA
Aff4	4917.04	0.0965228	0.188384	0.512374	0.608389	0.997447
Afg3l1	1684.58	0.061095	0.161437	0.378445	0.7051	0.997447
Afg3l2	1542.26	-0.0700768	0.181553	-0.385986	0.699507	0.997447
Afmid	146.462	0.625735	0.428454	1.46045	0.144166	0.997447
Afp	788.813	-0.257914	0.478665	-0.538819	0.590012	0.997447
Aftph	1197.44	0.0155474	0.168558	0.0922373	0.926509	1
Aga	618.05	-0.127375	0.241428	-0.527589	0.597785	0.997447
Agap1	781.028	-0.262657	0.286719	-0.916077	0.359626	0.997447
Agap3	1979.98	-0.0075622	0.138583	-0.0545678	0.956483	1
Agbl2	131.788	0.268905	0.472308	0.569342	0.569124	0.997447
Agbl3	82.4859	-0.748935	0.58148	-1.28798	0.197753	0.997447
Agbl4	1.59338	2.14114	3.932	0.544541	0.586069	NA
Agbl5	317.742	-0.268058	0.327709	-0.817975	0.413371	0.997447
Ager	31862	-0.155186	0.313495	-0.495019	0.620587	0.997447
Agfg1	1620.46	-0.332833	0.26021	-1.27909	0.200865	0.997447
Agfg2	383.312	0.102678	0.291856	0.35181	0.724981	0.997447
Aggf1	1064.81	-0.0492307	0.180056	-0.273419	0.784531	0.997447
Agk	387.156	-0.585418	0.343947	-1.70206	0.088744	0.997447
Agl	645.293	-0.0819496	0.30426	-0.269341	0.787667	0.997447
Agmo	34.1402	0.69176	1.01141	0.683959	0.494001	0.997447
Agpat1	481.122	0.173243	0.228433	0.758397	0.448214	0.997447
Agpat2	1074.27	-0.112994	0.182162	-0.620291	0.535066	0.997447
Agpat3	1786.37	-0.0553341	0.184836	-0.299369	0.764659	0.997447
Agpat4	519.087	0.0915746	0.462513	0.197993	0.84305	0.998521
Agpat5	717.932	-0.0569004	0.291719	-0.195052	0.845352	0.99863
Agpat6	2706.82	-0.305246	0.200525	-1.52223	0.127951	0.997447
Agpat9	203.414	0.381505	0.361239	1.0561	0.290922	0.997447
Agphd1	40.6502	0.484491	0.901932	0.53717	0.59115	0.997447
Agps	2198.9	0.0593002	0.175976	0.336979	0.736133	0.997447
[truncated: 15,591 more rows]

## Sheet: KPSHet_v_KPS_DESeq2_enrichment
Gene	baseMean	log2FoldChange	lfcSE	stat	pvalue	padj
[truncated: 17,381 more rows]
